# Supplementary material for: HIF-1α is required for disturbed flow-induced metabolic reprogramming in human and porcine vascular endothelium
Source: eLife journal article supplement (doi:10.7554/elife.25217), 2017-05-30
Supplement: supp [file elife-25217-supp-v1.zip]

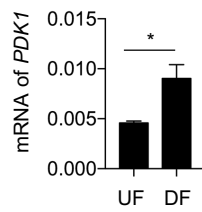

**Figure 5 – figure supplement 2. Differential flow regulates PDK1.** HAECs were subjected to either UF or DF for 24 hours prior to cell lysis, RNA purification, and qRT-PCR for *PDK1* (n = 4).
