# Supplementary material for: HIF-1α is required for disturbed flow-induced metabolic reprogramming in human and porcine vascular endothelium
Source: eLife journal article supplement (doi:10.7554/elife.25217), 2017-05-30
Supplement: supp [file elife-25217-supp-v1.zip]

Archive with 29 entries (29 files):
- elife_poa_e25217_Figure_5_figure_supplement_3.pdf
- elife_poa_e25217_Figure_1_figure_supplement_4.pdf
- elife_poa_e25217_Figure_1_figure_supplement_2.pdf
- elife_poa_e25217_Figure_1_figure_supplement_7.pdf
- elife_poa_e25217_Figure_3_figure_supplement_1.pdf
- elife_poa_e25217_Figure_6_figure_supplement_4.pdf
- elife_poa_e25217_Figure_2_figure_supplement_1.pdf
- elife_poa_e25217_Figure_1_source_data_1.xlsx
- elife_poa_e25217_Figure_6_figure_supplement_5.pdf
- elife_poa_e25217_Figure_4_figure_supplement_2.pdf
- elife_poa_e25217_Figure_1_figure_supplement_6.pdf
- elife_poa_e25217_Figure_6_figure_supplement_1.pdf
- elife_poa_e25217_Figure_5_figure_supplement_1.pdf
- elife_poa_e25217_Figure_6_figure_supplement_3.pdf
- elife_poa_e25217_Figure_6_figure_supplement_2.pdf
- elife_poa_e25217_Figure_1_figure_supplement_1.pdf
- elife_poa_e25217_Figure_5_figure_supplement_2.pdf
- elife_poa_e25217_Figure_2_figure_supplement_2.pdf
- elife_poa_e25217_Figure_3_figure_supplement_2.pdf
- elife_poa_e25217_Figure_2_source_data_3.xlsx
- elife_poa_e25217_Figure_1_source_data_2.xlsx
- elife_poa_e25217_Figure_1_figure_supplement_8.pdf
- elife_poa_e25217_Figure_1_figure_supplement_3.pdf
- elife_poa_e25217_Figure_1_figure_supplement_5.pdf
- elife_poa_e25217_Figure_2_source_data_2.xlsx
- elife_poa_e25217_Figure_4_figure_supplement_1.pdf
- elife_poa_e25217_Figure_7_figure_supplement_1.pdf
- elife_poa_e25217_Image_analysis_algorithm.m
- elife_poa_e25217_Figure_2_source_data_1.xlsx
