# Supplementary material for: HIF-1α is required for disturbed flow-induced metabolic reprogramming in human and porcine vascular endothelium
Source: eLife journal article supplement (doi:10.7554/elife.25217), 2017-05-30
Supplement: supp [file elife-25217-supp-v1.zip]

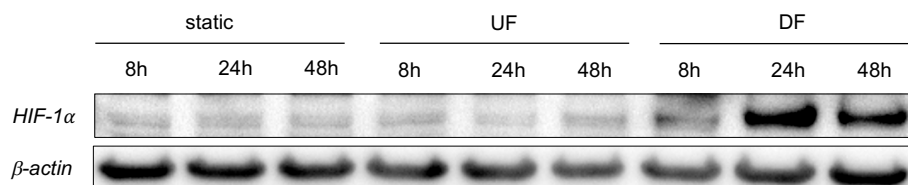

**Figure 2 – figure supplement 1. *HIF-1 $\alpha$*  under static, unidirectional flow, and disturbed flow.** HAECs were treated with either UF or DF, or no flow for 8, 24, or 48h prior to cell lysis and Western blotting.
