# Supplementary material for: HIF-1α is required for disturbed flow-induced metabolic reprogramming in human and porcine vascular endothelium
Source: eLife journal article supplement (doi:10.7554/elife.25217), 2017-05-30
Supplement: supp [file elife-25217-supp-v1.zip]

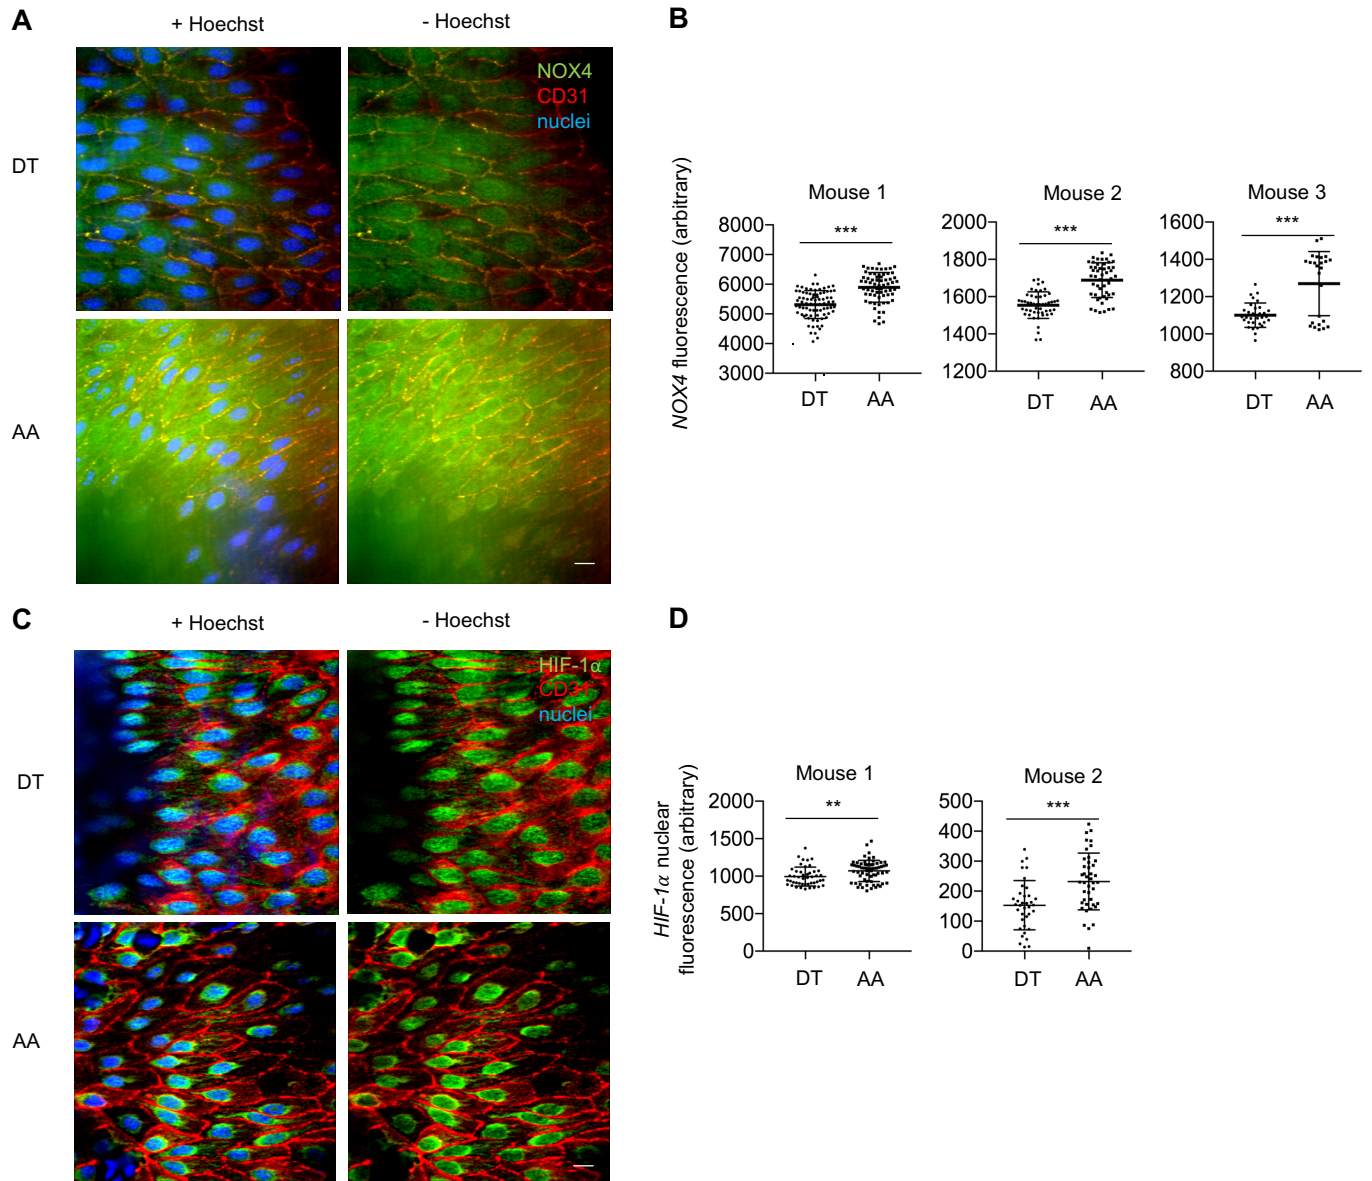

**Figure 7 – figure supplement 1. *NOX4* and *HIF-1 $\alpha$*  immunofluorescence in descending thoracic aorta (DT) and aortic arch (AA).** Mice were anesthetized and perfused with fixative prior to immunofluorescence staining. **A.** *NOX4* has higher fluorescence in the AA than DT. **B.** Quantification of fluorescence 26-50 cells per region per mouse. **C.** *HIF-1 $\alpha$*  has higher nuclear fluorescence in AA than DT. **D.** Quantification of *HIF-1 $\alpha$*  nuclear fluorescence 37-64 cells per region per mouse. Scale bar: 10  $\mu$ m. \*\*  $p < 0.005$ , \*\*\*  $p < 0.0005$  by non-parametric Kolmogorov-Smirnov test.
