# Supplementary material for: HIF-1α is required for disturbed flow-induced metabolic reprogramming in human and porcine vascular endothelium
Source: eLife journal article supplement (doi:10.7554/elife.25217), 2017-05-30
Supplement: supp [file elife-25217-supp-v1.zip]

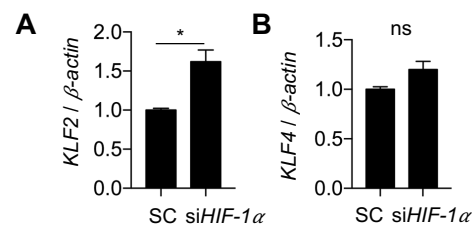

**Figure 6 – figure supplementary 5. Disturbed flow stabilization of *HIF-1 $\alpha$*  reduces *KLF2*.** HAECs were treated with either control siRNA or siRNA targeting *HIF-1 $\alpha$*  for 24 hours prior to DF for 48 hours, followed by cell lysis, RNA purification, and qRT-PCR (n = 4). **A.** *KLF2* is increased under siHIF-1 $\alpha$  and disturbed flow. **B.** *KLF4* is not significant (n = 4, p = 0.057).
