# Supplementary material for: HIF-1α is required for disturbed flow-induced metabolic reprogramming in human and porcine vascular endothelium
Source: eLife journal article supplement (doi:10.7554/elife.25217), 2017-05-30
Supplement: supp [file elife-25217-supp-v1.zip › elife_poa_e25217_Figure_1_figure_supplement_2.pdf]

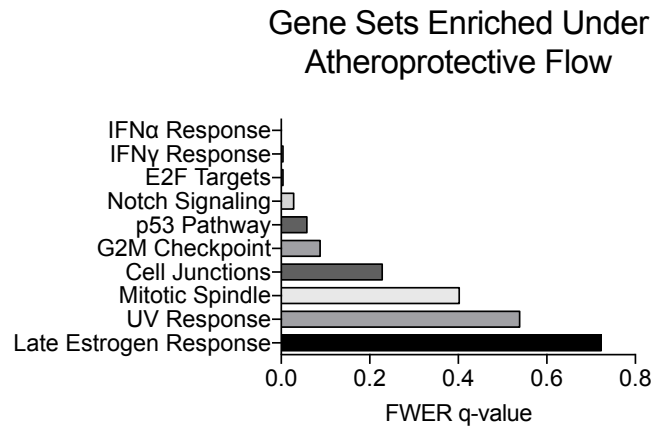

**Figure 1 – figure supplement 2. Gene set enrichment analysis of RNA-seq dataset of top 10 pathways enriched under unidirectional flow compared to disturbed flow.** Primary HAECs were subjected to either UF or DF for 24 hours before cell lysates were collected.
