# Supplementary material for: HIF-1α is required for disturbed flow-induced metabolic reprogramming in human and porcine vascular endothelium
Source: eLife journal article supplement (doi:10.7554/elife.25217), 2017-05-30
Supplement: supp [file elife-25217-supp-v1.zip › elife_poa_e25217_Figure_1_figure_supplement_5.pdf]

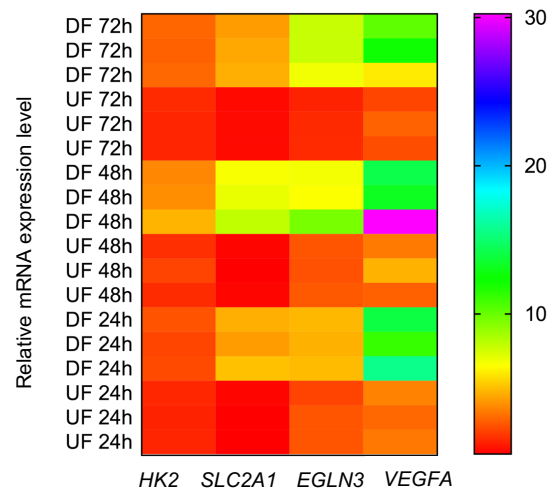

**Figure 1 – figure supplement 5. Persistence of glycolytic and hypoxia genes under disturbed or unidirectional flow.** HAECs were subjected to either DF or UF for 24, 48, or 72h prior to cell lysis, RNA purification, and qRT-PCR. Fold change of expression of *HK2*, *SLC2A1*, *EGLN3*, and *VEGFA*, relative to cells not treated with flow at each time point, are given above according to the color-code legend (n = 3 for each time point and each condition).
