# Supplementary material for: HIF-1α is required for disturbed flow-induced metabolic reprogramming in human and porcine vascular endothelium
Source: eLife journal article supplement (doi:10.7554/elife.25217), 2017-05-30
Supplement: supp [file elife-25217-supp-v1.zip › elife_poa_e25217_Figure_1_figure_supplement_6.pdf]

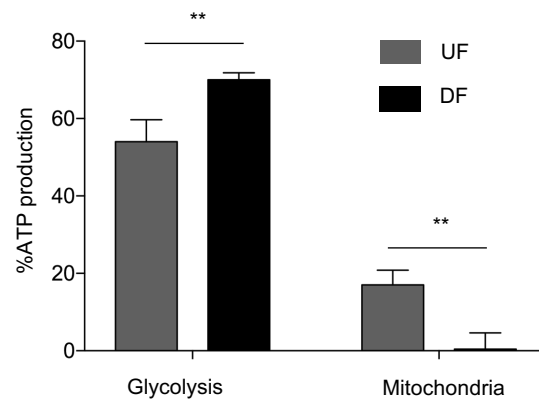

**Figure 1 – figure supplement 6. Mitochondrial ATP production is dependent on flow.**

HAECs were subjected to either DF or UF for 48 hours. 20,000 cells were then reseeded in either media, media with 2-deoxyglucose, or rotenone and antimycin. The ATP production was then quantified with a luciferase assay (n=4 for each condition, technical replicates). DF ATP production comes almost exclusively from glycolysis, compared to UF, which uses mitochondria for a portion (~17%) of ATP production.
