# Supplementary material for: HIF-1α is required for disturbed flow-induced metabolic reprogramming in human and porcine vascular endothelium
Source: eLife journal article supplement (doi:10.7554/elife.25217), 2017-05-30
Supplement: supp [file elife-25217-supp-v1.zip › elife_poa_e25217_Figure_1_figure_supplement_7.pdf]

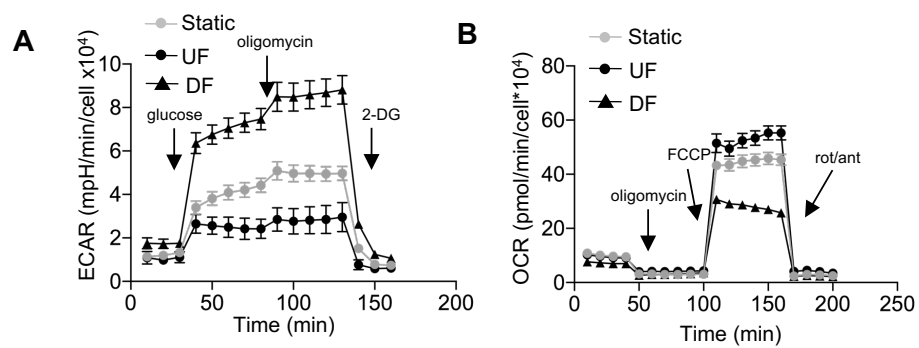

**Figure 1 – figure supplement 7. Glycolysis stress test and mitochondria stress test for HAEC after 48h of static, unidirectional flow, and disturbed flow.** In **(A)**, arrows indicate injection of glucose, oligomycin A, and 2-deoxyglucose (2DG) ( $n = 6$  for each data point). **B**. Arrows denote addition of oligomycin, carbonyl cyanide-4-(trifluoromethoxy)phenylhydrazone (FCCP), and rotenone/antimycin ( $n = 6$  for each data point).
