# Supplementary material for: HIF-1α is required for disturbed flow-induced metabolic reprogramming in human and porcine vascular endothelium
Source: eLife journal article supplement (doi:10.7554/elife.25217), 2017-05-30
Supplement: supp [file elife-25217-supp-v1.zip › elife_poa_e25217_Figure_1_figure_supplement_8.pdf]

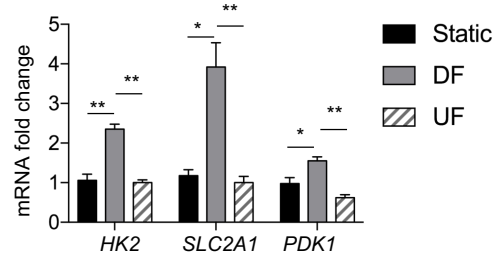

**Figure 1 – figure supplement 8. Comparison of glycolytic gene expression under disturbed flow, unidirectional flow, and static conditions.** HAECs were subjected to either no flow (static), DF or UF for 48 hours prior to cell lysis, RNA purification, and qRT-PCR. Fold change of expression of *HK2*, *SLC2A1*, and *PDK1* are shown (relative to static) (n = 3). \* p < 0.05; \*\* p < 0.005.
