# Supplementary material for: HIF-1α is required for disturbed flow-induced metabolic reprogramming in human and porcine vascular endothelium
Source: eLife journal article supplement (doi:10.7554/elife.25217), 2017-05-30
Supplement: supp [file elife-25217-supp-v1.zip › elife_poa_e25217_Figure_1_source_data_1.xlsx]

## Sheet: All Genes
test_id	gene_id	gene	locus	sample_1	sample_2	status	value_1	value_2	log2(fold_change)	test_stat	p_value	q_value	significant
ENSG00000000938.11	ENSG00000000938.11	FGR	chr1:27612063-27635277	Prone	Prot	OK	0.293711	0.944903	1.68577	1.15569	5e-05	0.00034525	yes
ENSG00000000971.14	ENSG00000000971.14	CFH	chr1:196651877-196747504	Prone	Prot	OK	40.4094	47.3499	0.228672	1.11673	5e-05	0.00034525	yes
ENSG00000001084.9	ENSG00000001084.9	GCLC	chr6:53497340-53617171	Prone	Prot	OK	8.43003	10.6323	0.334847	1.2111	5e-05	0.00034525	yes
ENSG00000001460.16	ENSG00000001460.16	STPG1	chr1:24307555-24472976	Prone	Prot	OK	2.02533	3.50278	0.790342	1.05857	5e-05	0.00034525	yes
ENSG00000001461.15	ENSG00000001461.15	NIPAL3	chr1:24307555-24472976	Prone	Prot	OK	6.75992	10.6572	0.65675	2.40013	5e-05	0.00034525	yes
ENSG00000001561.6	ENSG00000001561.6	ENPP4	chr6:46129992-46146699	Prone	Prot	OK	3.73356	4.65194	0.317283	1.42917	5e-05	0.00034525	yes
ENSG00000001617.10	ENSG00000001617.10	SEMA3F	chr3:49940006-50189075	Prone	Prot	OK	52.3976	69.5452	0.40845	1.13381	5e-05	0.00034525	yes
ENSG00000001630.14	ENSG00000001630.14	CYP51A1	chr7:92112150-92180725	Prone	Prot	OK	22.586	27.0628	0.260882	1.3327	5e-05	0.00034525	yes
ENSG00000002549.11	ENSG00000002549.11	LAP3	chr4:17577191-17614571	Prone	Prot	OK	52.6661	103.886	0.98006	5.87289	5e-05	0.00034525	yes
ENSG00000003096.12	ENSG00000003096.12	KLHL13	chrX:117897812-118117340	Prone	Prot	OK	5.21395	7.24407	0.474424	1.4365	5e-05	0.00034525	yes
ENSG00000003400.13	ENSG00000003400.13	CASP10	chr2:201182880-201229406	Prone	Prot	OK	11.9433	18.3058	0.616097	2.36167	5e-05	0.00034525	yes
ENSG00000003402.18	ENSG00000003402.18	CFLAR	chr2:201116103-201176687	Prone	Prot	OK	76.8914	103.9	0.434299	1.3704	5e-05	0.00034525	yes
ENSG00000003436.13	ENSG00000003436.13	TFPI	chr2:187001875-187565760	Prone	Prot	OK	301.003	207.504	-0.536636	-1.29862	5e-05	0.00034525	yes
ENSG00000003989.15	ENSG00000003989.15	SLC7A2	chr8:17497087-17570573	Prone	Prot	OK	5.74897	3.62511	-0.665276	-2.39088	5e-05	0.00034525	yes
ENSG00000004660.13	ENSG00000004660.13	CAMKK1	chr17:3860314-3894891	Prone	Prot	OK	1.59407	4.05332	1.34638	4.43676	5e-05	0.00034525	yes
ENSG00000005238.18	ENSG00000005238.18	FAM214B	chr9:35104111-35116341	Prone	Prot	OK	12.5715	16.657	0.405974	1.5126	5e-05	0.00034525	yes
ENSG00000005469.10	ENSG00000005469.10	CROT	chr7:87345680-87399795	Prone	Prot	OK	4.7922	9.57477	0.998551	2.20868	5e-05	0.00034525	yes
ENSG00000005486.15	ENSG00000005486.15	RHBDD2	chr7:75842601-75888926	Prone	Prot	OK	12.6489	15.9859	0.337785	1.18432	5e-05	0.00034525	yes
ENSG00000005884.16	ENSG00000005884.16	ITGA3	chr17:50055967-50090481	Prone	Prot	OK	37.7354	64.9183	0.782707	2.826	5e-05	0.00034525	yes
ENSG00000006042.10	ENSG00000006042.10	TMEM98	chr17:32927909-32945106	Prone	Prot	OK	42.937	35.4848	-0.275023	-1.33539	5e-05	0.00034525	yes
ENSG00000006282.18	ENSG00000006282.18	SPATA20	chr17:50532542-50555852	Prone	Prot	OK	24.5461	30.9312	0.333573	1.34939	5e-05	0.00034525	yes
ENSG00000006327.12	ENSG00000006327.12	TNFRSF12A	chr16:3014711-3022383	Prone	Prot	OK	24.0089	10.6935	-1.16684	-3.22787	5e-05	0.00034525	yes
ENSG00000006451.6	ENSG00000006451.6	RALA	chr7:39623482-39708124	Prone	Prot	OK	145.157	94.6405	-0.617089	-3.27672	5e-05	0.00034525	yes
ENSG00000006468.12	ENSG00000006468.12	ETV1	chr7:13891227-13991425	Prone	Prot	OK	2.44948	1.36505	-0.843523	-0.865353	5e-05	0.00034525	yes
ENSG00000006638.10	ENSG00000006638.10	TBXA2R	chr19:3594505-3606840	Prone	Prot	OK	0.597024	1.57162	1.3964	1.34089	5e-05	0.00034525	yes
ENSG00000007080.9	ENSG00000007080.9	CCDC124	chr19:17933015-17943991	Prone	Prot	OK	10.6831	13.7752	0.366734	1.30944	5e-05	0.00034525	yes
ENSG00000007541.13	ENSG00000007541.13	PIGQ	chr16:566994-584136	Prone	Prot	OK	17.107	21.5189	0.331018	1.23929	5e-05	0.00034525	yes
ENSG00000008130.14	ENSG00000008130.14	NADK	chr1:1751231-1780457	Prone	Prot	OK	24.2629	37.4836	0.627509	2.33101	5e-05	0.00034525	yes
ENSG00000008282.6	ENSG00000008282.6	SYPL1	chr7:106090502-106112576	Prone	Prot	OK	40.6299	46.9144	0.207491	1.19044	5e-05	0.00034525	yes
ENSG00000008294.19	ENSG00000008294.19	SPAG9	chr17:50962173-51120865	Prone	Prot	OK	38.9173	51.4971	0.404079	1.31956	5e-05	0.00034525	yes
ENSG00000008311.13	ENSG00000008311.13	AASS	chr7:122075646-122144280	Prone	Prot	OK	12.8047	10.3105	-0.31256	-1.54269	5e-05	0.00034525	yes
ENSG00000008517.15	ENSG00000008517.15	IL32	chr16:3065296-3087100	Prone	Prot	OK	13.765	19.3244	0.489423	1.65183	5e-05	0.00034525	yes
ENSG00000010278.10	ENSG00000010278.10	CD9	chr12:6199714-6238271	Prone	Prot	OK	595.177	719.581	0.273837	1.70005	5e-05	0.00034525	yes
ENSG00000010295.18	ENSG00000010295.18	IFFO1	chr12:6538374-6556083	Prone	Prot	OK	12.2205	17.3299	0.503952	2.35987	5e-05	0.00034525	yes
ENSG00000010327.9	ENSG00000010327.9	STAB1	chr3:52495337-52770949	Prone	Prot	OK	100.519	66.4941	-0.596163	-1.69303	5e-05	0.00034525	yes
ENSG00000011405.12	ENSG00000011405.12	PIK3C2A	chr11:17074388-17207983	Prone	Prot	OK	23.9253	37.0157	0.629601	1.39901	5e-05	0.00034525	yes
ENSG00000011451.16	ENSG00000011451.16	WIZ	chr19:15419979-15449951	Prone	Prot	OK	6.14811	7.93888	0.368793	1.22217	5e-05	0.00034525	yes
ENSG00000012061.14	ENSG00000012061.14	ERCC1	chr19:45379633-45478828	Prone	Prot	OK	41.001	33.7007	-0.282884	-1.14358	5e-05	0.00034525	yes
ENSG00000013364.17	ENSG00000013364.17	MVP	chr16:29806105-29848039	Prone	Prot	OK	94.3037	125.281	0.409778	1.60172	5e-05	0.00034525	yes
ENSG00000013375.14	ENSG00000013375.14	PGM3	chr6:83067665-83198932	Prone	Prot	OK	28.6564	17.3813	-0.721325	-1.75468	5e-05	0.00034525	yes
ENSG00000013563.12	ENSG00000013563.12	DNASE1L1	chrX:154389954-154421726	Prone	Prot	OK	28.5378	50.2809	0.817136	1.10229	5e-05	0.00034525	yes
ENSG00000013583.7	ENSG00000013583.7	HEBP1	chr12:12927725-13000273	Prone	Prot	OK	14.2753	19.9425	0.482327	1.86888	5e-05	0.00034525	yes
ENSG00000013619.12	ENSG00000013619.12	MAMLD1	chrX:150361421-150514178	Prone	Prot	OK	0.534887	1.05098	0.974428	1.04192	5e-05	0.00034525	yes
ENSG00000013810.17	ENSG00000013810.17	TACC3	chr4:1721489-1745176	Prone	Prot	OK	6.19268	8.48672	0.454644	1.05936	5e-05	0.00034525	yes
ENSG00000014164.6	ENSG00000014164.6	ZC3H3	chr8:143437654-143541453	Prone	Prot	OK	2.32639	3.08445	0.406919	1.17724	5e-05	0.00034525	yes
ENSG00000015133.17	ENSG00000015133.17	CCDC88C	chr14:91271322-91417844	Prone	Prot	OK	11.3688	16.7659	0.560456	1.38876	5e-05	0.00034525	yes
ENSG00000015413.8	ENSG00000015413.8	DPEP1	chr16:89613307-89638456	Prone	Prot	OK	0.799155	1.64756	1.04378	0.731433	5e-05	0.00034525	yes
ENSG00000018408.13	ENSG00000018408.13	WWTR1	chr3:149517234-149736714	Prone	Prot	OK	78.1559	59.438	-0.394968	-2.12829	5e-05	0.00034525	yes
ENSG00000019991.14	ENSG00000019991.14	HGF	chr7:81699005-81770438	Prone	Prot	OK	1.19751	2.02875	0.760548	1.06325	5e-05	0.00034525	yes
ENSG00000020181.16	ENSG00000020181.16	GPR124	chr8:37784190-37849904	Prone	Prot	OK	8.44508	13.1255	0.636184	1.66485	5e-05	0.00034525	yes
ENSG00000021355.11	ENSG00000021355.11	SERPINB1	chr6:2832331-2842006	Prone	Prot	OK	29.0999	41.7241	0.51987	2.28997	5e-05	0.00034525	yes
ENSG00000022567.8	ENSG00000022567.8	SLC45A4	chr8:141207165-141308305	Prone	Prot	OK	5.01198	2.36367	-1.08435	-1.72845	5e-05	0.00034525	yes
ENSG00000023330.13	ENSG00000023330.13	ALAS1	chr3:52198085-52214327	Prone	Prot	OK	19.6982	22.9506	0.220468	1.13594	5e-05	0.00034525	yes
ENSG00000023909.8	ENSG00000023909.8	GCLM	chr1:93885204-93909456	Prone	Prot	OK	16.1214	21.6724	0.42688	1.56818	5e-05	0.00034525	yes
ENSG00000024422.10	ENSG00000024422.10	EHD2	chr19:47607523-47743134	Prone	Prot	OK	13.9251	22.8456	0.714226	3.25936	5e-05	0.00034525	yes
ENSG00000025708.11	ENSG00000025708.11	TYMP	chr22:50523567-50532580	Prone	Prot	OK	5.50327	2.72604	-1.01348	-1.79757	5e-05	0.00034525	yes
ENSG00000030110.11	ENSG00000030110.11	BAK1	chr6:33540045-33593338	Prone	Prot	OK	11.3375	13.6526	0.26807	1.23568	5e-05	0.00034525	yes
ENSG00000030582.15	ENSG00000030582.15	GRN	chr17:44345245-44353102	Prone	Prot	OK	279.279	364.611	0.384651	2.06257	5e-05	0.00034525	yes
ENSG00000031081.9	ENSG00000031081.9	ARHGAP31	chr3:119294372-119420714	Prone	Prot	OK	16.813	25.0298	0.574065	1.14418	5e-05	0.00034525	yes
ENSG00000033327.11	ENSG00000033327.11	GAB2	chr11:78215296-78574874	Prone	Prot	OK	11.3821	7.59951	-0.582785	-2.2734	5e-05	0.00034525	yes
ENSG00000033867.15	ENSG00000033867.15	SLC4A7	chr3:27372720-27484420	Prone	Prot	OK	31.9856	22.775	-0.489971	-1.86496	5e-05	0.00034525	yes
ENSG00000034053.13	ENSG00000034053.13	APBA2	chr15:28884482-29118315	Prone	Prot	OK	10.7753	8.43561	-0.353165	-1.16017	5e-05	0.00034525	yes
ENSG00000034677.10	ENSG00000034677.10	RNF19A	chr8:100157905-100414459	Prone	Prot	OK	31.4859	22.1656	-0.506382	-1.59113	5e-05	0.00034525	yes
ENSG00000035664.10	ENSG00000035664.10	DAPK2	chr15:63907035-64072033	Prone	Prot	OK	4.21243	2.10757	-0.999071	-1.36408	5e-05	0.00034525	yes
ENSG00000035862.11	ENSG00000035862.11	TIMP2	chr17:78852976-78925387	Prone	Prot	OK	61.6884	73.601	0.254727	1.55314	5e-05	0.00034525	yes
ENSG00000038945.13	ENSG00000038945.13	MSR1	chr8:16107877-16567490	Prone	Prot	OK	5.39849	2.60773	-1.04976	-1.37432	5e-05	0.00034525	yes
ENSG00000039560.12	ENSG00000039560.12	RAI14	chr5:34656236-34832627	Prone	Prot	OK	74.7345	43.6871	-0.774568	-1.84237	5e-05	0.00034525	yes
ENSG00000044090.7	ENSG00000044090.7	CUL7	chr6:43037616-43075099	Prone	Prot	OK	17.0286	10.3262	-0.721648	-3.29964	5e-05	0.00034525	yes
ENSG00000046647.12	ENSG00000046647.12	GEMIN8	chrX:14008278-14029893	Prone	Prot	OK	9.39293	6.89908	-0.445171	-1.31644	5e-05	0.00034525	yes
ENSG00000046889.17	ENSG00000046889.17	PREX2	chr8:67952117-68237030	Prone	Prot	OK	17.6514	12.1972	-0.533239	-1.64638	5e-05	0.00034525	yes
ENSG00000047648.20	ENSG00000047648.20	ARHGAP6	chrX:11137542-11665701	Prone	Prot	OK	1.17883	1.72483	0.549089	1.33578	5e-05	0.00034525	yes
ENSG00000048740.16	ENSG00000048740.16	CELF2	chr10:11005295-11336675	Prone	Prot	OK	3.61956	4.63089	0.355476	1.0702	5e-05	0.00034525	yes
ENSG00000049130.12	ENSG00000049130.12	KITLG	chr12:88492792-88598218	Prone	Prot	OK	4.729	9.06491	0.938759	2.55521	5e-05	0.00034525	yes
ENSG00000049192.13	ENSG00000049192.13	ADAMTS6	chr5:65148735-65481920	Prone	Prot	OK	5.94109	9.58879	0.690622	1.76023	5e-05	0.00034525	yes
ENSG00000049239.11	ENSG00000049239.11	H6PD	chr1:9234774-9271337	Prone	Prot	OK	13.2269	10.7912	-0.293615	-1.58763	5e-05	0.00034525	yes
ENSG00000049540.15	ENSG00000049540.15	ELN	chr7:74027788-74069907	Prone	Prot	OK	0.575438	11.654	4.34002	1.80789	5e-05	0.00034525	yes
ENSG00000050165.16	ENSG00000050165.16	DKK3	chr11:11963105-12009769	Prone	Prot	OK	83.7319	55.7447	-0.586943	-3.31467	5e-05	0.00034525	yes
ENSG00000050405.12	ENSG00000050405.12	LIMA1	chr12:50175787-50283546	Prone	Prot	OK	14.0685	18.2606	0.376265	1.50829	5e-05	0.00034525	yes
ENSG00000050820.15	ENSG00000050820.15	BCAR1	chr16:75226073-75268053	Prone	Prot	OK	67.6974	42.1312	-0.684212	-2.78824	5e-05	0.00034525	yes
ENSG00000051009.9	ENSG00000051009.9	FAM160A2	chr11:6211334-6234711	Prone	Prot	OK	7.53933	10.0648	0.416813	1.38432	5e-05	0.00034525	yes
ENSG00000052126.13	ENSG00000052126.13	PLEKHA5	chr12:19129751-19376400	Prone	Prot	OK	4.70535	3.18515	-0.562942	-1.21709	5e-05	0.00034525	yes
ENSG00000052795.11	ENSG00000052795.11	FNIP2	chr4:158769137-159038760	Prone	Prot	OK	6.38814	9.3741	0.553284	1.65418	5e-05	0.00034525	yes
ENSG00000052802.11	ENSG00000052802.11	MSMO1	chr4:165327622-165343160	Prone	Prot	OK	18.0055	21.9289	0.284393	1.42761	5e-05	0.00034525	yes
ENSG00000053501.11	ENSG00000053501.11	USE1	chr19:17215345-17219829	Prone	Prot	OK	8.92943	6.56426	-0.443936	-1.20596	5e-05	0.00034525	yes
ENSG00000054219.10	ENSG00000054219.10	LY75	chr2:159712456-159904749	Prone	Prot	OK	39.3165	24.6615	-0.672876	-2.46977	5e-05	0.00034525	yes
ENSG00000055070.15	ENSG00000055070.15	SZRD1	chr1:16352574-16437424	Prone	Prot	OK	18.7017	23.7248	0.343224	1.28437	5e-05	0.00034525	yes
ENSG00000055813.5	ENSG00000055813.5	CCDC85A	chr2:55952157-56386173	Prone	Prot	OK	3.27379	4.75271	0.53779	1.48385	5e-05	0.00034525	yes
ENSG00000057252.11	ENSG00000057252.11	SOAT1	chr1:179293713-179358680	Prone	Prot	OK	8.27015	12.4352	0.588438	1.94283	5e-05	0.00034525	yes
ENSG00000057608.15	ENSG00000057608.15	GDI2	chr10:5765222-5842132	Prone	Prot	OK	155.395	132.829	-0.226368	-1.35938	5e-05	0.00034525	yes
ENSG00000057704.9	ENSG00000057704.9	TMCC3	chr12:94567123-94650562	Prone	Prot	OK	10.7947	8.09179	-0.415788	-2.07253	5e-05	0.00034525	yes
ENSG00000058668.13	ENSG00000058668.13	ATP2B4	chr1:203626560-203744081	Prone	Prot	OK	16.2589	24.7544	0.606458	2.542	5e-05	0.00034525	yes
ENSG00000059122.15	ENSG00000059122.15	FLYWCH1	chr16:2911936-2954276	Prone	Prot	OK	13.4862	17.9127	0.409496	1.30962	5e-05	0.00034525	yes
ENSG00000059573.7	ENSG00000059573.7	ALDH18A1	chr10:95605928-95656706	Prone	Prot	OK	26.7501	21.4072	-0.321444	-1.42668	5e-05	0.00034525	yes
ENSG00000059804.14	ENSG00000059804.14	SLC2A3	chr12:7919229-7936275	Prone	Prot	OK	68.3302	46.8096	-0.54572	-2.32491	5e-05	0.00034525	yes
ENSG00000060069.15	ENSG00000060069.15	CTDP1	chr18:79679800-79756623	Prone	Prot	OK	8.31641	10.3406	0.314287	1.2921	5e-05	0.00034525	yes
ENSG00000060237.15	ENSG00000060237.15	WNK1	chr12:752592-911452	Prone	Prot	OK	12.9302	25.0591	0.954595	2.34016	5e-05	0.00034525	yes
ENSG00000060491.15	ENSG00000060491.15	OGFR	chr20:62796452-62814000	Prone	Prot	OK	14.6813	18.5036	0.333824	1.29675	5e-05	0.00034525	yes
ENSG00000060762.17	ENSG00000060762.17	MPC1	chr6:166364918-166383013	Prone	Prot	OK	13.393	19.8488	0.567568	2.23203	5e-05	0.00034525	yes
ENSG00000061656.8	ENSG00000061656.8	SPAG4	chr20:35615891-35621049	Prone	Prot	OK	10.2179	3.08828	-1.72623	-2.68717	5e-05	0.00034525	yes
ENSG00000062598.16	ENSG00000062598.16	ELMO2	chr20:46364550-46459276	Prone	Prot	OK	8.42552	11.4417	0.44147	1.35201	5e-05	0.00034525	yes
ENSG00000063660.7	ENSG00000063660.7	GPC1	chr2:240435670-240468078	Prone	Prot	OK	12.1647	19.9555	0.714086	2.28805	5e-05	0.00034525	yes
ENSG00000064393.14	ENSG00000064393.14	HIPK2	chr7:139561569-140020325	Prone	Prot	OK	4.34142	5.57088	0.359738	1.62264	5e-05	0.00034525	yes
ENSG00000064601.15	ENSG00000064601.15	CTSA	chr20:45888624-45912155	Prone	Prot	OK	79.3428	106.684	0.427173	1.82123	5e-05	0.00034525	yes
ENSG00000064651.12	ENSG00000064651.12	SLC12A2	chr5:128083765-128189688	Prone	Prot	OK	13.2719	23.7219	0.837838	3.53849	5e-05	0.00034525	yes
ENSG00000064666.13	ENSG00000064666.13	CNN2	chr19:1026580-1039068	Prone	Prot	OK	45.6857	36.4159	-0.327176	-1.54206	5e-05	0.00034525	yes
ENSG00000064687.11	ENSG00000064687.11	ABCA7	chr19:1040100-1065572	Prone	Prot	OK	3.65438	9.36338	1.3574	1.72874	5e-05	0.00034525	yes
ENSG00000064692.17	ENSG00000064692.17	SNCAIP	chr5:122311296-122479087	Prone	Prot	OK	10.0877	4.14517	-1.28309	-2.83227	5e-05	0.00034525	yes
ENSG00000064989.11	ENSG00000064989.11	CALCRL	chr2:187001875-187565760	Prone	Prot	OK	239.635	381.371	0.670356	1.60675	5e-05	0.00034525	yes
ENSG00000064999.13	ENSG00000064999.13	ANKS1A	chr6:34889264-35091413	Prone	Prot	OK	4.61263	5.94966	0.367219	1.32422	5e-05	0.00034525	yes
ENSG00000065054.12	ENSG00000065054.12	SLC9A3R2	chr16:2025355-2039026	Prone	Prot	OK	34.6663	189.211	2.44839	13.0258	5e-05	0.00034525	yes
ENSG00000065057.6	ENSG00000065057.6	NTHL1	chr16:2039814-2135898	Prone	Prot	OK	10.2655	19.9183	0.956292	1.38513	5e-05	0.00034525	yes
ENSG00000065357.18	ENSG00000065357.18	DGKA	chr12:55901412-55954027	Prone	Prot	OK	11.9863	20.6431	0.784275	1.77487	5e-05	0.00034525	yes
ENSG00000065427.13	ENSG00000065427.13	KARS	chr16:75627473-75761872	Prone	Prot	OK	52.4406	44.718	-0.229828	-1.07657	5e-05	0.00034525	yes
ENSG00000065485.16	ENSG00000065485.16	PDIA5	chr3:123067061-123274130	Prone	Prot	OK	31.6223	22.6993	-0.478291	-2.13764	5e-05	0.00034525	yes
ENSG00000065613.12	ENSG00000065613.12	SLK	chr10:103967200-104029233	Prone	Prot	OK	14.5801	20.3709	0.482507	2.76432	5e-05	0.00034525	yes
ENSG00000065618.15	ENSG00000065618.15	COL17A1	chr10:104031285-104086002	Prone	Prot	OK	0.551059	5.40779	3.29476	2.71902	5e-05	0.00034525	yes
ENSG00000065717.13	ENSG00000065717.13	TLE2	chr19:2997637-3047635	Prone	Prot	OK	23.6792	12.1025	-0.968321	-3.0008	5e-05	0.00034525	yes
ENSG00000065802.10	ENSG00000065802.10	ASB1	chr2:238426741-238452250	Prone	Prot	OK	6.94903	4.70232	-0.563437	-1.01684	5e-05	0.00034525	yes
ENSG00000065809.12	ENSG00000065809.12	FAM107B	chr10:14518556-14774897	Prone	Prot	OK	101.953	58.7374	-0.79555	-3.77683	5e-05	0.00034525	yes
ENSG00000065833.8	ENSG00000065833.8	ME1	chr6:83210388-83431071	Prone	Prot	OK	8.71347	10.6194	0.285383	1.48565	5e-05	0.00034525	yes
ENSG00000066027.10	ENSG00000066027.10	PPP2R5A	chr1:212285536-212361863	Prone	Prot	OK	18.567	15.7439	-0.237947	-1.28131	5e-05	0.00034525	yes
ENSG00000066279.15	ENSG00000066279.15	ASPM	chr1:197084127-197146694	Prone	Prot	OK	3.98012	5.65981	0.507942	2.29942	5e-05	0.00034525	yes
ENSG00000066322.11	ENSG00000066322.11	ELOVL1	chr1:43363396-43368074	Prone	Prot	OK	53.8533	81.9617	0.605915	3.25403	5e-05	0.00034525	yes
ENSG00000066735.13	ENSG00000066735.13	KIF26A	chr14:104138722-104180894	Prone	Prot	OK	3.10905	7.7037	1.30908	5.91781	5e-05	0.00034525	yes
ENSG00000067057.15	ENSG00000067057.15	PFKP	chr10:3066332-3172841	Prone	Prot	OK	153.785	77.2456	-0.99339	-4.24724	5e-05	0.00034525	yes
ENSG00000067113.15	ENSG00000067113.15	PPAP2A	chr5:55307759-55535050	Prone	Prot	OK	9.875	39.0637	1.98397	4.74946	5e-05	0.00034525	yes
ENSG00000067177.13	ENSG00000067177.13	PHKA1	chrX:72578813-72714319	Prone	Prot	OK	2.41583	1.88909	-0.354825	-1.32674	5e-05	0.00034525	yes
ENSG00000067182.6	ENSG00000067182.6	TNFRSF1A	chr12:6328756-6342114	Prone	Prot	OK	40.0092	54.1882	0.437646	1.78783	5e-05	0.00034525	yes
ENSG00000067445.19	ENSG00000067445.19	TRO	chrX:54920461-54931431	Prone	Prot	OK	1.65421	0.901446	-0.875834	-0.601777	5e-05	0.00034525	yes
ENSG00000067560.9	ENSG00000067560.9	RHOA	chr3:49359144-49416475	Prone	Prot	OK	267.417	327.185	0.291016	1.80204	5e-05	0.00034525	yes
ENSG00000067836.11	ENSG00000067836.11	ROGDI	chr16:4796967-4802950	Prone	Prot	OK	3.09336	4.6795	0.597178	0.96887	5e-05	0.00034525	yes
ENSG00000068001.12	ENSG00000068001.12	HYAL2	chr3:50317789-50328251	Prone	Prot	OK	193.781	345.694	0.835069	4.94771	5e-05	0.00034525	yes
ENSG00000068079.6	ENSG00000068079.6	IFI35	chr17:43006724-43014456	Prone	Prot	OK	5.72254	8.73676	0.610442	1.38082	5e-05	0.00034525	yes
ENSG00000068305.16	ENSG00000068305.16	MEF2A	chr15:99565416-99733561	Prone	Prot	OK	16.0278	22.8482	0.511502	1.6011	5e-05	0.00034525	yes
ENSG00000069399.11	ENSG00000069399.11	BCL3	chr19:44747704-44760044	Prone	Prot	OK	2.0466	4.20359	1.03839	1.36421	5e-05	0.00034525	yes
ENSG00000069849.9	ENSG00000069849.9	ATP1B3	chr3:141876123-141926514	Prone	Prot	OK	100.015	121.661	0.282651	1.50576	5e-05	0.00034525	yes
ENSG00000070366.12	ENSG00000070366.12	SMG6	chr17:2054153-2381058	Prone	Prot	OK	16.4822	10.3238	-0.674934	-1.28778	5e-05	0.00034525	yes
ENSG00000070423.16	ENSG00000070423.16	RNF126	chr19:647525-663277	Prone	Prot	OK	11.5172	15.9495	0.469724	1.54381	5e-05	0.00034525	yes
ENSG00000070495.13	ENSG00000070495.13	JMJD6	chr17:76712831-76726799	Prone	Prot	OK	10.7864	7.92032	-0.445584	-1.30041	5e-05	0.00034525	yes
ENSG00000070610.13	ENSG00000070610.13	GBA2	chr9:35696947-35749228	Prone	Prot	OK	52.9096	30.3491	-0.801875	-1.28349	5e-05	0.00034525	yes
ENSG00000071054.14	ENSG00000071054.14	MAP4K4	chr2:101696849-101894689	Prone	Prot	OK	122.613	92.2142	-0.411048	-1.73104	5e-05	0.00034525	yes
ENSG00000071073.11	ENSG00000071073.11	MGAT4A	chr2:98619105-98731126	Prone	Prot	OK	35.416	56.8277	0.682191	2.19309	5e-05	0.00034525	yes
ENSG00000071242.10	ENSG00000071242.10	RPS6KA2	chr6:166409363-166957191	Prone	Prot	OK	35.6027	26.6045	-0.420319	-1.92854	5e-05	0.00034525	yes
ENSG00000071246.9	ENSG00000071246.9	VASH1	chr14:76762188-76826246	Prone	Prot	OK	129.257	97.3401	-0.409133	-1.37545	5e-05	0.00034525	yes
ENSG00000071282.10	ENSG00000071282.10	LMCD1	chr3:7952804-8611924	Prone	Prot	OK	1.25677	3.4841	1.47107	2.0051	5e-05	0.00034525	yes
ENSG00000071575.10	ENSG00000071575.10	TRIB2	chr2:12716888-12742734	Prone	Prot	OK	9.90116	6.54629	-0.59692	-1.77796	5e-05	0.00034525	yes
ENSG00000071794.14	ENSG00000071794.14	HLTF	chr3:149030126-149102823	Prone	Prot	OK	11.6893	9.52957	-0.294709	-1.01718	5e-05	0.00034525	yes
ENSG00000071967.10	ENSG00000071967.10	CYBRD1	chr2:171522246-171558133	Prone	Prot	OK	28.7718	35.4336	0.300465	1.17157	5e-05	0.00034525	yes
ENSG00000072062.12	ENSG00000072062.12	PRKACA	chr19:14091687-14118084	Prone	Prot	OK	4.5166	6.08567	0.430179	1.0403	5e-05	0.00034525	yes
ENSG00000072163.17	ENSG00000072163.17	LIMS2	chr2:127638380-127681786	Prone	Prot	OK	5.62875	15.0746	1.42124	4.14817	5e-05	0.00034525	yes
ENSG00000072210.17	ENSG00000072210.17	ALDH3A2	chr17:19648135-19677598	Prone	Prot	OK	16.7405	25.2135	0.590852	1.97287	5e-05	0.00034525	yes
ENSG00000072682.17	ENSG00000072682.17	P4HA2	chr5:132184875-132395614	Prone	Prot	OK	27.0323	17.5814	-0.620633	-2.12455	5e-05	0.00034525	yes
ENSG00000072864.11	ENSG00000072864.11	NDE1	chr16:15643266-15857033	Prone	Prot	OK	14.4582	19.1756	0.407384	1.36553	5e-05	0.00034525	yes
ENSG00000072954.5	ENSG00000072954.5	TMEM38A	chr19:16661126-16690029	Prone	Prot	OK	1.73437	4.949	1.51272	2.28392	5e-05	0.00034525	yes
ENSG00000073350.12	ENSG00000073350.12	LLGL2	chr17:75525079-75575208	Prone	Prot	OK	4.11026	6.85767	0.738487	1.24921	5e-05	0.00034525	yes
ENSG00000073417.13	ENSG00000073417.13	PDE8A	chr15:84980439-85139145	Prone	Prot	OK	14.5026	9.18754	-0.65856	-2.01333	5e-05	0.00034525	yes
ENSG00000073711.9	ENSG00000073711.9	PPP2R3A	chr3:135965672-136147891	Prone	Prot	OK	4.61534	3.61127	-0.353929	-1.3865	5e-05	0.00034525	yes
ENSG00000074219.12	ENSG00000074219.12	TEAD2	chr19:49331616-49388081	Prone	Prot	OK	26.6775	22.7611	-0.229055	-1.10606	5e-05	0.00034525	yes
ENSG00000074527.10	ENSG00000074527.10	NTN4	chr12:95551581-95791152	Prone	Prot	OK	103.01	60.2658	-0.773371	-3.98285	5e-05	0.00034525	yes
ENSG00000074657.12	ENSG00000074657.12	ZNF532	chr18:58862599-58986480	Prone	Prot	OK	19.7775	13.4074	-0.56083	-1.45076	5e-05	0.00034525	yes
ENSG00000074695.5	ENSG00000074695.5	LMAN1	chr18:59327822-59359962	Prone	Prot	OK	41.9748	30.6559	-0.453359	-2.45018	5e-05	0.00034525	yes
ENSG00000074800.12	ENSG00000074800.12	ENO1	chr1:8861001-8879894	Prone	Prot	OK	537.891	371.751	-0.532977	-3.0981	5e-05	0.00034525	yes
ENSG00000075420.11	ENSG00000075420.11	FNDC3B	chr3:172039627-172401665	Prone	Prot	OK	69.7434	44.0219	-0.663835	-2.54089	5e-05	0.00034525	yes
ENSG00000076321.9	ENSG00000076321.9	KLHL20	chr1:173714940-173786702	Prone	Prot	OK	21.09	11.5991	-0.862547	-2.51054	5e-05	0.00034525	yes
ENSG00000077549.16	ENSG00000077549.16	CAPZB	chr1:19338775-19485539	Prone	Prot	OK	104.351	84.2162	-0.309269	-1.6878	5e-05	0.00034525	yes
ENSG00000078269.12	ENSG00000078269.12	SYNJ2	chr6:157981886-158099176	Prone	Prot	OK	24.984	39.6322	0.66567	2.35695	5e-05	0.00034525	yes
ENSG00000078401.6	ENSG00000078401.6	EDN1	chr6:12290362-12297194	Prone	Prot	OK	211.207	64.26	-1.71666	-10.78	5e-05	0.00034525	yes
ENSG00000078596.9	ENSG00000078596.9	ITM2A	chrX:79360383-79367667	Prone	Prot	OK	3.38556	5.79383	0.775121	1.58371	5e-05	0.00034525	yes
ENSG00000079102.15	ENSG00000079102.15	RUNX1T1	chr8:91954966-92103286	Prone	Prot	OK	4.20292	7.11326	0.759121	1.14416	5e-05	0.00034525	yes
ENSG00000079150.16	ENSG00000079150.16	FKBP7	chr2:178463663-178478600	Prone	Prot	OK	12.28	7.78075	-0.658333	-1.77209	5e-05	0.00034525	yes
ENSG00000079257.6	ENSG00000079257.6	LXN	chr3:158644277-158692575	Prone	Prot	OK	124.109	66.3535	-0.903359	-4.52484	5e-05	0.00034525	yes
ENSG00000079332.13	ENSG00000079332.13	SAR1A	chr10:70147288-70170523	Prone	Prot	OK	41.6294	35.5997	-0.225738	-1.27991	5e-05	0.00034525	yes
ENSG00000079432.6	ENSG00000079432.6	CIC	chr19:42268536-42295797	Prone	Prot	OK	8.24574	14.6239	0.82661	2.07021	5e-05	0.00034525	yes
ENSG00000079459.11	ENSG00000079459.11	FDFT1	chr8:11795572-11839309	Prone	Prot	OK	37.7989	47.206	0.320626	1.39641	5e-05	0.00034525	yes
ENSG00000079691.16	ENSG00000079691.16	LRRC16A	chr6:25279077-25620530	Prone	Prot	OK	3.40312	6.44535	0.9214	3.61137	5e-05	0.00034525	yes
ENSG00000079739.14	ENSG00000079739.14	PGM1	chr1:63440769-63660245	Prone	Prot	OK	19.7449	9.94626	-0.989256	-3.58398	5e-05	0.00034525	yes
ENSG00000079999.12	ENSG00000079999.12	KEAP1	chr19:10486119-10503741	Prone	Prot	OK	31.5496	38.7778	0.297608	1.38284	5e-05	0.00034525	yes
ENSG00000081041.8	ENSG00000081041.8	CXCL2	chr4:74097034-74099293	Prone	Prot	OK	1.39564	2.83379	1.0218	1.55696	5e-05	0.00034525	yes
ENSG00000081803.14	ENSG00000081803.14	CADPS2	chr7:122318424-122886759	Prone	Prot	OK	21.2829	25.9157	0.284136	1.56773	5e-05	0.00034525	yes
ENSG00000081913.12	ENSG00000081913.12	PHLPP1	chr18:62715449-62980433	Prone	Prot	OK	1.96334	2.8158	0.520231	1.00717	5e-05	0.00034525	yes
ENSG00000082126.16	ENSG00000082126.16	MPP4	chr2:201644869-201698694	Prone	Prot	OK	1.67543	0.834361	-1.00579	-1.51455	5e-05	0.00034525	yes
ENSG00000082397.14	ENSG00000082397.14	EPB41L3	chr18:5392380-5630700	Prone	Prot	OK	16.4235	8.30381	-0.983915	-2.37078	5e-05	0.00034525	yes
ENSG00000082512.13	ENSG00000082512.13	TRAF5	chr1:211326614-211374946	Prone	Prot	OK	8.16899	5.47442	-0.577452	-1.68155	5e-05	0.00034525	yes
ENSG00000082781.10	ENSG00000082781.10	ITGB5	chr3:124761947-124901418	Prone	Prot	OK	71.9786	54.3615	-0.404983	-1.45062	5e-05	0.00034525	yes
ENSG00000083444.15	ENSG00000083444.15	PLOD1	chr1:11934204-11975538	Prone	Prot	OK	154.3	101.288	-0.607272	-3.21788	5e-05	0.00034525	yes
ENSG00000084072.15	ENSG00000084072.15	PPIE	chr1:39692181-39788861	Prone	Prot	OK	17.2972	14.214	-0.283224	-1.23799	5e-05	0.00034525	yes
ENSG00000084090.12	ENSG00000084090.12	STARD7	chr2:96184858-96242621	Prone	Prot	OK	67.6931	91.4724	0.434327	2.10027	5e-05	0.00034525	yes
ENSG00000084112.13	ENSG00000084112.13	SSH1	chr12:108778143-108857590	Prone	Prot	OK	7.08619	13.7072	0.951856	2.23455	5e-05	0.00034525	yes
ENSG00000084734.7	ENSG00000084734.7	GCKR	chr2:27496841-27523684	Prone	Prot	OK	0.770279	3.12152	2.0188	1.97519	5e-05	0.00034525	yes
ENSG00000085063.13	ENSG00000085063.13	CD59	chr11:33698260-33736445	Prone	Prot	OK	599.432	1441.4	1.2658	5.10174	5e-05	0.00034525	yes
ENSG00000085117.10	ENSG00000085117.10	CD82	chr11:44564426-44620363	Prone	Prot	OK	40.5573	21.0453	-0.946462	-2.53108	5e-05	0.00034525	yes
ENSG00000085276.16	ENSG00000085276.16	MECOM	chr3:169083498-169663618	Prone	Prot	OK	52.8586	42.0474	-0.330122	-1.2164	5e-05	0.00034525	yes
ENSG00000085365.16	ENSG00000085365.16	SCAMP1	chr5:78360582-78479071	Prone	Prot	OK	25.4469	19.815	-0.360894	-1.68146	5e-05	0.00034525	yes
ENSG00000085563.13	ENSG00000085563.13	ABCB1	chr7:87503632-87832296	Prone	Prot	OK	4.97415	9.1333	0.876686	1.68034	5e-05	0.00034525	yes
ENSG00000085662.12	ENSG00000085662.12	AKR1B1	chr7:134442349-134459284	Prone	Prot	OK	131.921	191.771	0.539709	3.34373	5e-05	0.00034525	yes
ENSG00000085871.7	ENSG00000085871.7	MGST2	chr4:139665767-140154184	Prone	Prot	OK	53.5064	37.9053	-0.497313	-1.76188	5e-05	0.00034525	yes
ENSG00000086061.14	ENSG00000086061.14	DNAJA1	chr9:33025210-33039907	Prone	Prot	OK	52.2782	63.7041	0.285177	1.72084	5e-05	0.00034525	yes
ENSG00000086062.11	ENSG00000086062.11	B4GALT1	chr9:33104081-33179983	Prone	Prot	OK	7.42765	9.41025	0.341327	1.67452	5e-05	0.00034525	yes
ENSG00000086598.9	ENSG00000086598.9	TMED2	chr12:123575890-123598577	Prone	Prot	OK	102.447	88.3491	-0.213594	-1.33324	5e-05	0.00034525	yes
ENSG00000086991.11	ENSG00000086991.11	NOX4	chr11:89324355-89498187	Prone	Prot	OK	18.9949	6.81203	-1.47945	-4.03044	5e-05	0.00034525	yes
ENSG00000087086.12	ENSG00000087086.12	FTL	chr19:48965300-48966878	Prone	Prot	OK	2354.37	2960.69	0.330592	1.69612	5e-05	0.00034525	yes
ENSG00000087206.15	ENSG00000087206.15	UIMC1	chr5:176905004-177022633	Prone	Prot	OK	21.4243	16.528	-0.374332	-1.5226	5e-05	0.00034525	yes
ENSG00000087253.10	ENSG00000087253.10	LPCAT2	chr16:55508997-55586670	Prone	Prot	OK	23.8763	18.2913	-0.384419	-1.28606	5e-05	0.00034525	yes
ENSG00000087266.14	ENSG00000087266.14	SH3BP2	chr4:2793022-2841098	Prone	Prot	OK	28.1605	69.9667	1.31299	4.07896	5e-05	0.00034525	yes
ENSG00000087274.15	ENSG00000087274.15	ADD1	chr4:2843856-2930076	Prone	Prot	OK	66.7676	111.11	0.73477	2.87041	5e-05	0.00034525	yes
ENSG00000087303.15	ENSG00000087303.15	NID2	chr14:51989474-52069228	Prone	Prot	OK	23.6264	30.7579	0.380559	1.4279	5e-05	0.00034525	yes
ENSG00000087842.9	ENSG00000087842.9	PIR	chrX:15384798-15556529	Prone	Prot	OK	47.6366	61.8305	0.376249	1.07004	5e-05	0.00034525	yes
ENSG00000087903.11	ENSG00000087903.11	RFX2	chr19:5978402-6199572	Prone	Prot	OK	4.32706	1.87312	-1.20794	-1.10144	5e-05	0.00034525	yes
ENSG00000088038.16	ENSG00000088038.16	CNOT3	chr19:54137727-54159882	Prone	Prot	OK	1.82878	2.94058	0.685216	1.40561	5e-05	0.00034525	yes
ENSG00000088280.17	ENSG00000088280.17	ASAP3	chr1:23428562-23484568	Prone	Prot	OK	5.10531	13.032	1.35198	3.47691	5e-05	0.00034525	yes
ENSG00000088325.14	ENSG00000088325.14	TPX2	chr20:31739270-31801805	Prone	Prot	OK	4.94771	7.27297	0.555784	2.69442	5e-05	0.00034525	yes
ENSG00000088340.14	ENSG00000088340.14	FER1L4	chr20:35558736-35607562	Prone	Prot	OK	3.49232	0.753083	-2.2133	-1.84629	5e-05	0.00034525	yes
ENSG00000088387.16	ENSG00000088387.16	DOCK9	chr13:98793486-99086625	Prone	Prot	OK	147.708	104.393	-0.500724	-1.6954	5e-05	0.00034525	yes
ENSG00000088756.11	ENSG00000088756.11	ARHGAP28	chr18:6727052-6915716	Prone	Prot	OK	3.92885	1.87908	-1.06408	-1.52553	5e-05	0.00034525	yes
ENSG00000088826.16	ENSG00000088826.16	SMOX	chr20:4120979-4187747	Prone	Prot	OK	8.74833	5.70135	-0.617706	-1.34464	5e-05	0.00034525	yes
ENSG00000088832.13	ENSG00000088832.13	FKBP1A	chr20:1309908-1393172	Prone	Prot	OK	204.924	171.143	-0.259889	-1.43266	5e-05	0.00034525	yes
ENSG00000088882.7	ENSG00000088882.7	CPXM1	chr20:2794068-2800637	Prone	Prot	OK	1.98651	1.33154	-0.577138	-1.40057	5e-05	0.00034525	yes
ENSG00000089060.10	ENSG00000089060.10	SLC8B1	chr12:113298758-113391625	Prone	Prot	OK	10.8002	17.3311	0.682302	2.35684	5e-05	0.00034525	yes
ENSG00000089127.11	ENSG00000089127.11	OAS1	chr12:112906776-113017751	Prone	Prot	OK	2.03088	5.33523	1.39345	1.54203	5e-05	0.00034525	yes
ENSG00000089327.13	ENSG00000089327.13	FXYD5	chr19:35154729-35169883	Prone	Prot	OK	29.0733	43.7476	0.589512	2.96026	5e-05	0.00034525	yes
ENSG00000090238.10	ENSG00000090238.10	YPEL3	chr16:30092313-30104116	Prone	Prot	OK	24.4755	19.1868	-0.351225	-1.2051	5e-05	0.00034525	yes
ENSG00000090339.7	ENSG00000090339.7	ICAM1	chr19:10251900-10289019	Prone	Prot	OK	12.4931	20.0745	0.684235	1.75192	5e-05	0.00034525	yes
ENSG00000090776.5	ENSG00000090776.5	EFNB1	chrX:68828996-68842147	Prone	Prot	OK	16.5415	51.2141	1.63045	9.35801	5e-05	0.00034525	yes
ENSG00000090861.14	ENSG00000090861.14	AARS	chr16:70252294-70289543	Prone	Prot	OK	18.4049	22.9085	0.315789	1.46157	5e-05	0.00034525	yes
ENSG00000090971.4	ENSG00000090971.4	NAT14	chr19:55485003-55487568	Prone	Prot	OK	15.6298	11.5295	-0.438972	-1.16842	5e-05	0.00034525	yes
ENSG00000091136.12	ENSG00000091136.12	LAMB1	chr7:107890969-108003255	Prone	Prot	OK	245.431	187.681	-0.387035	-1.05798	5e-05	0.00034525	yes
ENSG00000091409.13	ENSG00000091409.13	ITGA6	chr2:172427353-172608669	Prone	Prot	OK	45.4313	76.5138	0.752034	2.89361	5e-05	0.00034525	yes
ENSG00000091428.16	ENSG00000091428.16	RAPGEF4	chr2:172677140-173052893	Prone	Prot	OK	5.36967	8.65405	0.688543	1.6172	5e-05	0.00034525	yes
ENSG00000091490.9	ENSG00000091490.9	SEL1L3	chr4:25747426-25929874	Prone	Prot	OK	63.824	78.8378	0.304789	1.57179	5e-05	0.00034525	yes
ENSG00000091527.14	ENSG00000091527.14	CDV3	chr3:133573729-133590261	Prone	Prot	OK	66.2106	79.1715	0.257919	1.33267	5e-05	0.00034525	yes
ENSG00000091879.12	ENSG00000091879.12	ANGPT2	chr8:6403550-6708209	Prone	Prot	OK	95.9869	20.1776	-2.25008	-10.6364	5e-05	0.00034525	yes
ENSG00000091972.17	ENSG00000091972.17	CD200	chr3:112302477-112362812	Prone	Prot	OK	6.93105	3.12513	-1.14916	-3.56162	5e-05	0.00034525	yes
ENSG00000092445.10	ENSG00000092445.10	TYRO3	chr15:41557674-41583586	Prone	Prot	OK	5.54416	8.09906	0.546785	1.34693	5e-05	0.00034525	yes
ENSG00000092531.8	ENSG00000092531.8	SNAP23	chr15:42491232-42548802	Prone	Prot	OK	60.7948	48.6293	-0.322123	-1.12882	5e-05	0.00034525	yes
ENSG00000092820.16	ENSG00000092820.16	EZR	chr6:158765740-158820593	Prone	Prot	OK	22.0117	26.8433	0.286295	1.68756	5e-05	0.00034525	yes
ENSG00000095370.18	ENSG00000095370.18	SH2D3C	chr9:127738316-127778741	Prone	Prot	OK	22.893	32.5707	0.508668	2.46273	5e-05	0.00034525	yes
ENSG00000095383.18	ENSG00000095383.18	TBC1D2	chr9:98198998-98255721	Prone	Prot	OK	1.50334	5.9165	1.97657	5.27194	5e-05	0.00034525	yes
ENSG00000095564.12	ENSG00000095564.12	BTAF1	chr10:91923768-92030325	Prone	Prot	OK	12.3749	10.4849	-0.239109	-1.08594	5e-05	0.00034525	yes
ENSG00000096060.13	ENSG00000096060.13	FKBP5	chr6:35573584-35728583	Prone	Prot	OK	8.10303	13.8978	0.77832	4.21247	5e-05	0.00034525	yes
ENSG00000096433.9	ENSG00000096433.9	ITPR3	chr6:33620364-33711727	Prone	Prot	OK	16.2864	34.1068	1.06639	6.27213	5e-05	0.00034525	yes
ENSG00000097007.16	ENSG00000097007.16	ABL1	chr9:130713945-130887675	Prone	Prot	OK	23.9357	17.2076	-0.476116	-1.27388	5e-05	0.00034525	yes
ENSG00000097021.18	ENSG00000097021.18	ACOT7	chr1:6264268-6394391	Prone	Prot	OK	21.1528	29.5274	0.481211	2.41913	5e-05	0.00034525	yes
ENSG00000097096.8	ENSG00000097096.8	SYDE2	chr1:85156872-85201046	Prone	Prot	OK	1.02326	0.703155	-0.541261	-1.29063	5e-05	0.00034525	yes
ENSG00000099194.5	ENSG00000099194.5	SCD	chr10:100347123-100364834	Prone	Prot	OK	29.7799	41.6212	0.48298	3.0759	5e-05	0.00034525	yes
ENSG00000099250.16	ENSG00000099250.16	NRP1	chr10:33177491-33336262	Prone	Prot	OK	141.267	100.599	-0.489804	-2.28214	5e-05	0.00034525	yes
ENSG00000099260.9	ENSG00000099260.9	PALMD	chr1:99645942-99694541	Prone	Prot	OK	44.2243	36.4226	-0.280006	-1.74657	5e-05	0.00034525	yes
ENSG00000099282.8	ENSG00000099282.8	TSPAN15	chr10:69451472-69507669	Prone	Prot	OK	15.8329	8.10691	-0.965698	-3.44303	5e-05	0.00034525	yes
ENSG00000099860.7	ENSG00000099860.7	GADD45B	chr19:2476121-2478259	Prone	Prot	OK	26.8074	18.1842	-0.559944	-1.59354	5e-05	0.00034525	yes
ENSG00000099864.16	ENSG00000099864.16	PALM	chr19:709092-748330	Prone	Prot	OK	3.87632	18.4115	2.24785	7.95372	5e-05	0.00034525	yes
ENSG00000099875.13	ENSG00000099875.13	MKNK2	chr19:2037464-2051244	Prone	Prot	OK	62.659	118.826	0.923258	3.25714	5e-05	0.00034525	yes
ENSG00000099953.8	ENSG00000099953.8	MMP11	chr22:23763020-23784316	Prone	Prot	OK	5.90089	3.94363	-0.581409	-0.945776	5e-05	0.00034525	yes
ENSG00000099998.16	ENSG00000099998.16	GGT5	chr22:24219653-24245142	Prone	Prot	OK	16.7195	32.9791	0.980018	2.81402	5e-05	0.00034525	yes
ENSG00000100033.15	ENSG00000100033.15	PRODH	chr22:18906027-18936553	Prone	Prot	OK	0.106102	1.00653	3.24587	0.530366	5e-05	0.00034525	yes
ENSG00000100034.12	ENSG00000100034.12	PPM1F	chr22:21919419-21982816	Prone	Prot	OK	64.1858	79.8253	0.314593	1.08272	5e-05	0.00034525	yes
ENSG00000100036.12	ENSG00000100036.12	SLC35E4	chr22:30635651-30669016	Prone	Prot	OK	5.60141	12.3753	1.14361	3.93382	5e-05	0.00034525	yes
ENSG00000100065.13	ENSG00000100065.13	CARD10	chr22:37490361-37519542	Prone	Prot	OK	20.8596	30.8604	0.565049	2.63523	5e-05	0.00034525	yes
ENSG00000100106.18	ENSG00000100106.18	TRIOBP	chr22:37681672-37776556	Prone	Prot	OK	23.489	42.529	0.856465	3.77571	5e-05	0.00034525	yes
ENSG00000100219.15	ENSG00000100219.15	XBP1	chr22:28772673-28848559	Prone	Prot	OK	43.1355	32.4183	-0.412065	-1.7977	5e-05	0.00034525	yes
ENSG00000100234.11	ENSG00000100234.11	TIMP3	chr22:32512551-33058372	Prone	Prot	OK	2.17079	1.39096	-0.642134	-2.03998	5e-05	0.00034525	yes
ENSG00000100243.19	ENSG00000100243.19	CYB5R3	chr22:42617839-42649568	Prone	Prot	OK	29.4225	36.9676	0.329342	1.7555	5e-05	0.00034525	yes
ENSG00000100280.15	ENSG00000100280.15	AP1B1	chr22:29327679-29423193	Prone	Prot	OK	50.4605	40.8779	-0.303834	-1.67097	5e-05	0.00034525	yes
ENSG00000100292.15	ENSG00000100292.15	HMOX1	chr22:35380360-35394214	Prone	Prot	OK	69.4586	208.861	1.58832	8.90164	5e-05	0.00034525	yes
ENSG00000100300.16	ENSG00000100300.16	TSPO	chr22:43151513-43163242	Prone	Prot	OK	218.894	257.69	0.235405	1.43446	5e-05	0.00034525	yes
ENSG00000100311.15	ENSG00000100311.15	PDGFB	chr22:39223358-39244751	Prone	Prot	OK	43.925	15.4504	-1.50739	-6.81011	5e-05	0.00034525	yes
ENSG00000100316.14	ENSG00000100316.14	RPL3	chr22:39312881-39320389	Prone	Prot	OK	1058.84	877.172	-0.271551	-1.49818	5e-05	0.00034525	yes
ENSG00000100342.19	ENSG00000100342.19	APOL1	chr22:36253009-36267530	Prone	Prot	OK	10.6123	21.1882	0.997518	4.06475	5e-05	0.00034525	yes
ENSG00000100345.19	ENSG00000100345.19	MYH9	chr22:36281280-36388018	Prone	Prot	OK	270.645	209.815	-0.367282	-1.36987	5e-05	0.00034525	yes
ENSG00000100353.16	ENSG00000100353.16	EIF3D	chr22:36510849-36529436	Prone	Prot	OK	105.247	89.8915	-0.227521	-1.37424	5e-05	0.00034525	yes
ENSG00000100364.17	ENSG00000100364.17	KIAA0930	chr22:45190337-45240769	Prone	Prot	OK	25.0344	30.5466	0.287099	1.22728	5e-05	0.00034525	yes
ENSG00000100368.12	ENSG00000100368.12	CSF2RB	chr22:36913627-36940449	Prone	Prot	OK	4.15191	6.02428	0.537012	2.22536	5e-05	0.00034525	yes
ENSG00000100403.11	ENSG00000100403.11	ZC3H7B	chr22:41301521-41360147	Prone	Prot	OK	23.146	20.1249	-0.201779	-1.24248	5e-05	0.00034525	yes
ENSG00000100422.12	ENSG00000100422.12	CERK	chr22:46684410-46738261	Prone	Prot	OK	54.1944	27.9777	-0.953869	-4.78625	5e-05	0.00034525	yes
ENSG00000100439.9	ENSG00000100439.9	ABHD4	chr14:22595807-22613215	Prone	Prot	OK	3.60735	5.72332	0.665913	1.24524	5e-05	0.00034525	yes
ENSG00000100441.8	ENSG00000100441.8	KHNYN	chr14:24426531-24442905	Prone	Prot	OK	32.2778	24.0656	-0.423571	-1.41703	5e-05	0.00034525	yes
ENSG00000100504.15	ENSG00000100504.15	PYGL	chr14:50848121-50944736	Prone	Prot	OK	24.3421	13.0397	-0.900538	-4.27965	5e-05	0.00034525	yes
ENSG00000100558.7	ENSG00000100558.7	PLEK2	chr14:67386982-67412200	Prone	Prot	OK	1.70399	2.58236	0.59978	0.895821	5e-05	0.00034525	yes
ENSG00000100605.15	ENSG00000100605.15	ITPK1	chr14:92936913-93116320	Prone	Prot	OK	19.5062	26.2808	0.430077	1.44705	5e-05	0.00034525	yes
ENSG00000100625.8	ENSG00000100625.8	SIX4	chr14:60709527-60724348	Prone	Prot	OK	1.87776	1.05368	-0.833571	-1.81012	5e-05	0.00034525	yes
ENSG00000100883.10	ENSG00000100883.10	SRP54	chr14:34920857-35029567	Prone	Prot	OK	26.2255	21.4603	-0.289301	-1.11964	5e-05	0.00034525	yes
ENSG00000100890.14	ENSG00000100890.14	KIAA0391	chr14:35044906-35317493	Prone	Prot	OK	20.5151	29.3187	0.515135	1.2197	5e-05	0.00034525	yes
ENSG00000100906.9	ENSG00000100906.9	NFKBIA	chr14:35401510-35404749	Prone	Prot	OK	59.7265	108.64	0.863118	4.49522	5e-05	0.00034525	yes
ENSG00000100934.13	ENSG00000100934.13	SEC23A	chr14:39031918-39109646	Prone	Prot	OK	64.7362	48.0219	-0.430879	-2.13097	5e-05	0.00034525	yes
ENSG00000100968.12	ENSG00000100968.12	NFATC4	chr14:24365672-24379604	Prone	Prot	OK	45.6317	25.8955	-0.817334	-2.32509	5e-05	0.00034525	yes
ENSG00000100994.10	ENSG00000100994.10	PYGB	chr20:25248068-25390983	Prone	Prot	OK	23.8027	33.088	0.475186	2.49761	5e-05	0.00034525	yes
ENSG00000101057.14	ENSG00000101057.14	MYBL2	chr20:43667018-43716496	Prone	Prot	OK	1.72876	2.88326	0.737966	2.30323	5e-05	0.00034525	yes
ENSG00000101134.10	ENSG00000101134.10	DOK5	chr20:54475596-54651171	Prone	Prot	OK	7.88639	11.2118	0.507575	1.80048	5e-05	0.00034525	yes
ENSG00000101160.12	ENSG00000101160.12	CTSZ	chr20:58995184-59007247	Prone	Prot	OK	78.7088	69.3253	-0.183144	-1.08493	5e-05	0.00034525	yes
ENSG00000101187.14	ENSG00000101187.14	SLCO4A1	chr20:62640718-62685785	Prone	Prot	OK	1.12425	6.0959	2.43887	3.15643	5e-05	0.00034525	yes
ENSG00000101194.16	ENSG00000101194.16	SLC17A9	chr20:62952646-62969585	Prone	Prot	OK	8.93307	5.90557	-0.597079	-1.31516	5e-05	0.00034525	yes
ENSG00000101224.16	ENSG00000101224.16	CDC25B	chr20:3786771-3806121	Prone	Prot	OK	9.47233	33.0812	1.80422	7.31169	5e-05	0.00034525	yes
ENSG00000101265.14	ENSG00000101265.14	RASSF2	chr20:4780022-4823645	Prone	Prot	OK	36.2654	12.8736	-1.49418	-9.12461	5e-05	0.00034525	yes
ENSG00000101331.14	ENSG00000101331.14	CCM2L	chr20:32010449-32032180	Prone	Prot	OK	6.89348	17.5247	1.34609	4.93124	5e-05	0.00034525	yes
ENSG00000101333.15	ENSG00000101333.15	PLCB4	chr20:9068762-9481242	Prone	Prot	OK	0.492643	1.37802	1.48398	0.895345	5e-05	0.00034525	yes
ENSG00000101347.8	ENSG00000101347.8	SAMHD1	chr20:36876120-36951843	Prone	Prot	OK	8.40805	10.6658	0.343145	1.68522	5e-05	0.00034525	yes
ENSG00000101384.10	ENSG00000101384.10	JAG1	chr20:10637683-10994924	Prone	Prot	OK	19.1609	25.2725	0.399404	1.52861	5e-05	0.00034525	yes
ENSG00000101412.12	ENSG00000101412.12	E2F1	chr20:33675682-33686404	Prone	Prot	OK	1.38494	2.07646	0.584296	1.36025	5e-05	0.00034525	yes
ENSG00000101447.12	ENSG00000101447.12	FAM83D	chr20:38926311-38953106	Prone	Prot	OK	4.05108	8.20945	1.01898	3.96386	5e-05	0.00034525	yes
ENSG00000101452.13	ENSG00000101452.13	DHX35	chr20:38962298-39039723	Prone	Prot	OK	2.87312	4.14635	0.529224	1.4671	5e-05	0.00034525	yes
ENSG00000101608.11	ENSG00000101608.11	MYL12A	chr18:3247480-3261850	Prone	Prot	OK	275.419	207.337	-0.409648	-2.51837	5e-05	0.00034525	yes
ENSG00000101665.7	ENSG00000101665.7	SMAD7	chr18:48919852-48950711	Prone	Prot	OK	9.48986	4.63445	-1.03399	-2.71291	5e-05	0.00034525	yes
ENSG00000101670.10	ENSG00000101670.10	LIPG	chr18:49560698-49599182	Prone	Prot	OK	39.0755	13.9544	-1.48555	-5.76959	5e-05	0.00034525	yes
ENSG00000101695.7	ENSG00000101695.7	RNF125	chr18:32018371-32470484	Prone	Prot	OK	0.339253	1.42109	2.06657	1.11149	5e-05	0.00034525	yes
ENSG00000101751.9	ENSG00000101751.9	POLI	chr18:54268345-54321266	Prone	Prot	OK	13.5541	9.3571	-0.534594	-1.80026	5e-05	0.00034525	yes
ENSG00000101844.16	ENSG00000101844.16	ATG4A	chrX:108091667-108154671	Prone	Prot	OK	8.36274	10.6475	0.348465	1.31265	5e-05	0.00034525	yes
ENSG00000101846.6	ENSG00000101846.6	STS	chrX:7219455-7354810	Prone	Prot	OK	1.35604	2.10409	0.633803	2.43943	5e-05	0.00034525	yes
ENSG00000101974.13	ENSG00000101974.13	ATP11C	chrX:139726345-139945276	Prone	Prot	OK	19.8475	28.0799	0.500586	2.23071	5e-05	0.00034525	yes
ENSG00000102024.16	ENSG00000102024.16	PLS3	chrX:115518181-115650861	Prone	Prot	OK	156.032	132.797	-0.232617	-1.3956	5e-05	0.00034525	yes
ENSG00000102030.14	ENSG00000102030.14	NAA10	chrX:153861513-153935223	Prone	Prot	OK	50.8999	75.8121	0.574765	2.22585	5e-05	0.00034525	yes
ENSG00000102038.14	ENSG00000102038.14	SMARCA1	chrX:129446500-129523500	Prone	Prot	OK	15.9177	13.3545	-0.253302	-1.42763	5e-05	0.00034525	yes
ENSG00000102144.12	ENSG00000102144.12	PGK1	chrX:78065187-78129296	Prone	Prot	OK	123.618	93.707	-0.399662	-1.59264	5e-05	0.00034525	yes
ENSG00000102172.14	ENSG00000102172.14	SMS	chrX:21940572-21994835	Prone	Prot	OK	49.8083	29.3232	-0.764344	-4.42029	5e-05	0.00034525	yes
ENSG00000102189.15	ENSG00000102189.15	EEA1	chr12:92721504-92929331	Prone	Prot	OK	5.33	6.76007	0.342901	1.11772	5e-05	0.00034525	yes
ENSG00000102265.10	ENSG00000102265.10	TIMP1	chrX:47561099-47619853	Prone	Prot	OK	77.2584	90.832	0.233508	1.07773	5e-05	0.00034525	yes
ENSG00000102316.15	ENSG00000102316.15	MAGED2	chrX:54807598-54816012	Prone	Prot	OK	122.938	84.9182	-0.533789	-2.71887	5e-05	0.00034525	yes
ENSG00000102349.13	ENSG00000102349.13	KLF8	chrX:56232420-56287889	Prone	Prot	OK	0.649259	1.93766	1.57745	2.63536	5e-05	0.00034525	yes
ENSG00000102359.5	ENSG00000102359.5	SRPX2	chrX:100644217-100671299	Prone	Prot	OK	60.4144	35.0843	-0.784067	-4.31735	5e-05	0.00034525	yes
ENSG00000102409.9	ENSG00000102409.9	BEX4	chrX:103215091-103217246	Prone	Prot	OK	20.6307	17.1006	-0.270749	-1.26586	5e-05	0.00034525	yes
ENSG00000102452.14	ENSG00000102452.14	NALCN	chr13:100708324-101416492	Prone	Prot	OK	1.2319	0.480232	-1.35908	-1.318	5e-05	0.00034525	yes
ENSG00000102471.12	ENSG00000102471.12	NDFIP2	chr13:79477363-79556075	Prone	Prot	OK	12.9964	9.8133	-0.405298	-1.66474	5e-05	0.00034525	yes
ENSG00000102575.9	ENSG00000102575.9	ACP5	chr19:11559373-11619135	Prone	Prot	OK	1.19085	14.8173	3.63721	2.85168	5e-05	0.00034525	yes
ENSG00000102738.7	ENSG00000102738.7	MRPS31	chr13:40729134-40771173	Prone	Prot	OK	6.54858	4.99863	-0.38965	-1.22871	5e-05	0.00034525	yes
ENSG00000102755.9	ENSG00000102755.9	FLT1	chr13:28300343-28495128	Prone	Prot	OK	111.667	38.5176	-1.53561	-8.33436	5e-05	0.00034525	yes
ENSG00000102760.12	ENSG00000102760.12	RGCC	chr13:41457558-41470882	Prone	Prot	OK	78.3932	27.6349	-1.50424	-7.36622	5e-05	0.00034525	yes
ENSG00000102804.13	ENSG00000102804.13	TSC22D1	chr13:44432142-44580432	Prone	Prot	OK	22.0959	29.8286	0.432918	1.79358	5e-05	0.00034525	yes
ENSG00000102908.19	ENSG00000102908.19	NFAT5	chr16:69565093-69704666	Prone	Prot	OK	9.87604	13.8626	0.489191	1.25883	5e-05	0.00034525	yes
ENSG00000102935.10	ENSG00000102935.10	ZNF423	chr16:49487523-49857919	Prone	Prot	OK	0.446964	1.30857	1.54976	1.25744	5e-05	0.00034525	yes
ENSG00000102981.8	ENSG00000102981.8	PARD6A	chr16:67660945-67662778	Prone	Prot	OK	2.56673	3.72323	0.536622	1.13644	5e-05	0.00034525	yes
ENSG00000102996.4	ENSG00000102996.4	MMP15	chr16:58025565-58046901	Prone	Prot	OK	5.14376	7.6858	0.579373	2.15832	5e-05	0.00034525	yes
ENSG00000103018.15	ENSG00000103018.15	CYB5B	chr16:69424524-69466266	Prone	Prot	OK	97.4912	127.762	0.390111	1.89681	5e-05	0.00034525	yes
ENSG00000103034.13	ENSG00000103034.13	NDRG4	chr16:58462845-58513628	Prone	Prot	OK	45.0425	75.4238	0.743732	2.8118	5e-05	0.00034525	yes
ENSG00000103145.9	ENSG00000103145.9	HCFC1R1	chr16:3022619-3039133	Prone	Prot	OK	15.7081	22.2043	0.499335	1.2196	5e-05	0.00034525	yes
ENSG00000103168.15	ENSG00000103168.15	TAF1C	chr16:84145286-84187070	Prone	Prot	OK	20.4256	29.1399	0.512618	1.49949	5e-05	0.00034525	yes
ENSG00000103174.10	ENSG00000103174.10	NAGPA	chr16:4882506-5097808	Prone	Prot	OK	15.5308	19.7703	0.348199	1.10023	5e-05	0.00034525	yes
ENSG00000103197.15	ENSG00000103197.15	TSC2	chr16:2039814-2135898	Prone	Prot	OK	29.011	43.605	0.587893	1.54543	5e-05	0.00034525	yes
ENSG00000103222.17	ENSG00000103222.17	ABCC1	chr16:15949576-16143074	Prone	Prot	OK	9.97252	12.9986	0.382321	1.3117	5e-05	0.00034525	yes
ENSG00000103249.16	ENSG00000103249.16	CLCN7	chr16:1444933-1475580	Prone	Prot	OK	34.6561	47.0051	0.439709	1.35661	5e-05	0.00034525	yes
ENSG00000103326.9	ENSG00000103326.9	CAPN15	chr16:527716-554636	Prone	Prot	OK	10.0295	14.7523	0.556685	1.60122	5e-05	0.00034525	yes
ENSG00000103404.13	ENSG00000103404.13	USP31	chr16:23061405-23149270	Prone	Prot	OK	10.4957	8.00386	-0.391035	-1.45062	5e-05	0.00034525	yes
ENSG00000103490.13	ENSG00000103490.13	PYCARD	chr16:31201484-31203452	Prone	Prot	OK	18.4401	12.7477	-0.532611	-1.45774	5e-05	0.00034525	yes
ENSG00000103591.11	ENSG00000103591.11	AAGAB	chr15:67201032-67530143	Prone	Prot	OK	13.4979	16.2898	0.271229	1.09653	5e-05	0.00034525	yes
ENSG00000103657.12	ENSG00000103657.12	HERC1	chr15:63608617-63833942	Prone	Prot	OK	32.7381	22.0466	-0.570415	-1.17353	5e-05	0.00034525	yes
ENSG00000103769.8	ENSG00000103769.8	RAB11A	chr15:65611365-65891991	Prone	Prot	OK	121.232	175.748	0.535734	2.27995	5e-05	0.00034525	yes
ENSG00000103811.14	ENSG00000103811.14	CTSH	chr15:78921057-78949574	Prone	Prot	OK	2.16923	3.96649	0.870676	1.17672	5e-05	0.00034525	yes
ENSG00000103855.16	ENSG00000103855.16	CD276	chr15:73683965-73714518	Prone	Prot	OK	31.2548	44.8346	0.520535	2.0763	5e-05	0.00034525	yes
ENSG00000104365.12	ENSG00000104365.12	IKBKB	chr8:42271301-42332653	Prone	Prot	OK	20.2289	27.935	0.465651	1.41328	5e-05	0.00034525	yes
ENSG00000104368.16	ENSG00000104368.16	PLAT	chr8:42175232-42207724	Prone	Prot	OK	22.0636	51.7658	1.23033	6.21025	5e-05	0.00034525	yes
ENSG00000104419.13	ENSG00000104419.13	NDRG1	chr8:133237170-133302022	Prone	Prot	OK	62.8802	46.0561	-0.449214	-1.71952	5e-05	0.00034525	yes
ENSG00000104497.12	ENSG00000104497.12	SNX16	chr8:81791822-81842866	Prone	Prot	OK	4.90059	6.12011	0.320601	1.0007	5e-05	0.00034525	yes
ENSG00000104522.14	ENSG00000104522.14	TSTA3	chr8:143612617-143618048	Prone	Prot	OK	30.8628	44.1046	0.515062	2.3851	5e-05	0.00034525	yes
ENSG00000104613.10	ENSG00000104613.10	INTS10	chr8:19817139-19852083	Prone	Prot	OK	33.7322	25.8688	-0.382913	-1.27918	5e-05	0.00034525	yes
ENSG00000104660.16	ENSG00000104660.16	LEPROTL1	chr8:30095397-30183640	Prone	Prot	OK	25.464	16.6552	-0.612487	-1.67068	5e-05	0.00034525	yes
ENSG00000104687.11	ENSG00000104687.11	GSR	chr8:30678060-30727926	Prone	Prot	OK	17.7299	22.4373	0.339715	1.7542	5e-05	0.00034525	yes
ENSG00000104756.14	ENSG00000104756.14	KCTD9	chr8:25427846-25458476	Prone	Prot	OK	9.1236	13.126	0.524757	1.26665	5e-05	0.00034525	yes
ENSG00000104765.13	ENSG00000104765.13	BNIP3L	chr8:26379258-26514092	Prone	Prot	OK	87.0699	47.0354	-0.888428	-4.27406	5e-05	0.00034525	yes
ENSG00000104783.10	ENSG00000104783.10	KCNN4	chr19:43766532-43781257	Prone	Prot	OK	0.37589	4.27397	3.50719	2.14519	5e-05	0.00034525	yes
ENSG00000104853.14	ENSG00000104853.14	CLPTM1	chr19:44954584-44993341	Prone	Prot	OK	17.3157	22.5504	0.381073	1.57945	5e-05	0.00034525	yes
ENSG00000104904.11	ENSG00000104904.11	OAZ1	chr19:2252251-2354806	Prone	Prot	OK	587.044	516.669	-0.184228	-1.09603	5e-05	0.00034525	yes
ENSG00000104953.17	ENSG00000104953.17	TLE6	chr19:2977445-2995184	Prone	Prot	OK	2.26059	0.521373	-2.11631	-1.51993	5e-05	0.00034525	yes
ENSG00000104967.6	ENSG00000104967.6	NOVA2	chr19:45933733-45973546	Prone	Prot	OK	1.22882	2.29175	0.899173	1.16056	5e-05	0.00034525	yes
ENSG00000105193.7	ENSG00000105193.7	RPS16	chr19:39433206-39435948	Prone	Prot	OK	116.991	177.937	0.604976	3.11471	5e-05	0.00034525	yes
ENSG00000105202.6	ENSG00000105202.6	FBL	chr19:39834457-39846414	Prone	Prot	OK	43.9429	35.5318	-0.306522	-1.36389	5e-05	0.00034525	yes
ENSG00000105327.14	ENSG00000105327.14	BBC3	chr19:47220821-47232766	Prone	Prot	OK	13.9748	26.1066	0.901593	3.91899	5e-05	0.00034525	yes
ENSG00000105329.8	ENSG00000105329.8	TGFB1	chr19:41262495-41440717	Prone	Prot	OK	43.4489	27.0605	-0.683133	-1.6865	5e-05	0.00034525	yes
ENSG00000105402.6	ENSG00000105402.6	NAPA	chr19:47484281-47515240	Prone	Prot	OK	38.9838	47.5258	0.285836	1.27442	5e-05	0.00034525	yes
ENSG00000105538.7	ENSG00000105538.7	RASIP1	chr19:48720586-48740721	Prone	Prot	OK	27.8943	37.3526	0.421239	2.20738	5e-05	0.00034525	yes
ENSG00000105711.9	ENSG00000105711.9	SCN1B	chr19:35030683-35040448	Prone	Prot	OK	14.7766	18.1928	0.300048	1.15783	5e-05	0.00034525	yes
ENSG00000105829.10	ENSG00000105829.10	BET1	chr7:93962761-94011113	Prone	Prot	OK	28.107	20.9339	-0.425089	-1.85189	5e-05	0.00034525	yes
ENSG00000105835.10	ENSG00000105835.10	NAMPT	chr7:106248284-106286326	Prone	Prot	OK	137.216	92.1122	-0.574986	-1.97866	5e-05	0.00034525	yes
ENSG00000105889.13	ENSG00000105889.13	STEAP1B	chr7:22419443-22665533	Prone	Prot	OK	6.71658	9.50642	0.501175	1.33956	5e-05	0.00034525	yes
ENSG00000105953.13	ENSG00000105953.13	OGDH	chr7:44606571-44709066	Prone	Prot	OK	12.9355	25.2027	0.962246	4.44329	5e-05	0.00034525	yes
ENSG00000106003.11	ENSG00000106003.11	LFNG	chr7:2512528-2529177	Prone	Prot	OK	2.36824	7.43167	1.64987	4.07995	5e-05	0.00034525	yes
ENSG00000106009.14	ENSG00000106009.14	BRAT1	chr7:2537876-2555727	Prone	Prot	OK	12.4765	16.3018	0.385818	1.4888	5e-05	0.00034525	yes
ENSG00000106070.16	ENSG00000106070.16	GRB10	chr7:50590062-50793462	Prone	Prot	OK	111.38	71.8289	-0.632852	-2.38861	5e-05	0.00034525	yes
ENSG00000106077.17	ENSG00000106077.17	ABHD11	chr7:73736093-73738867	Prone	Prot	OK	1.20222	2.27708	0.921491	0.93729	5e-05	0.00034525	yes
ENSG00000106086.17	ENSG00000106086.17	PLEKHA8	chr7:30027403-30130483	Prone	Prot	OK	7.0032	5.65824	-0.307659	-1.2047	5e-05	0.00034525	yes
ENSG00000106211.8	ENSG00000106211.8	HSPB1	chr7:76302543-76304295	Prone	Prot	OK	205.213	266.064	0.37465	2.17119	5e-05	0.00034525	yes
ENSG00000106366.8	ENSG00000106366.8	SERPINE1	chr7:101127088-101139266	Prone	Prot	OK	736.549	245.47	-1.58524	-8.40688	5e-05	0.00034525	yes
ENSG00000106397.10	ENSG00000106397.10	PLOD3	chr7:101205976-101224190	Prone	Prot	OK	46.166	58.663	0.345619	1.23156	5e-05	0.00034525	yes
ENSG00000106404.12	ENSG00000106404.12	CLDN15	chr7:101232091-101238820	Prone	Prot	OK	5.15011	46.3382	3.16953	10.535	5e-05	0.00034525	yes
ENSG00000106537.7	ENSG00000106537.7	TSPAN13	chr7:16753534-16784536	Prone	Prot	OK	25.8552	15.8332	-0.707504	-3.41123	5e-05	0.00034525	yes
ENSG00000106638.14	ENSG00000106638.14	TBL2	chr7:73568931-73578791	Prone	Prot	OK	13.5783	10.8218	-0.327358	-1.08758	5e-05	0.00034525	yes
ENSG00000106688.10	ENSG00000106688.10	SLC1A1	chr9:4490443-4666674	Prone	Prot	OK	8.54403	5.62252	-0.6037	-2.15566	5e-05	0.00034525	yes
ENSG00000106714.16	ENSG00000106714.16	CNTNAP3	chr9:39072766-39288315	Prone	Prot	OK	13.9037	10.9138	-0.349318	-1.2285	5e-05	0.00034525	yes
ENSG00000106733.19	ENSG00000106733.19	NMRK1	chr9:75060572-75088217	Prone	Prot	OK	31.8348	20.8702	-0.609162	-2.485	5e-05	0.00034525	yes
ENSG00000106780.8	ENSG00000106780.8	MEGF9	chr9:120600812-120714470	Prone	Prot	OK	12.8441	10.346	-0.312031	-1.80447	5e-05	0.00034525	yes
ENSG00000106853.15	ENSG00000106853.15	PTGR1	chr9:111525158-111599855	Prone	Prot	OK	70.9031	97.9416	0.466073	2.70491	5e-05	0.00034525	yes
ENSG00000106991.12	ENSG00000106991.12	ENG	chr9:127815011-127854756	Prone	Prot	OK	38.616	22.7123	-0.765722	-3.7164	5e-05	0.00034525	yes
ENSG00000106992.16	ENSG00000106992.16	AK1	chr9:127866479-127905408	Prone	Prot	OK	52.7007	36.6957	-0.522212	-1.27915	5e-05	0.00034525	yes
ENSG00000107104.17	ENSG00000107104.17	KANK1	chr9:212823-746106	Prone	Prot	OK	13.7491	10.4379	-0.397506	-1.8967	5e-05	0.00034525	yes
ENSG00000107130.8	ENSG00000107130.8	NCS1	chr9:130172577-130237304	Prone	Prot	OK	11.5124	8.18898	-0.491437	-1.70363	5e-05	0.00034525	yes
ENSG00000107201.8	ENSG00000107201.8	DDX58	chr9:32455704-32526324	Prone	Prot	OK	6.30795	8.58576	0.444775	2.38485	5e-05	0.00034525	yes
ENSG00000107249.20	ENSG00000107249.20	GLIS3	chr9:3824126-4348392	Prone	Prot	OK	2.97028	8.07049	1.44206	2.30826	5e-05	0.00034525	yes
ENSG00000107281.8	ENSG00000107281.8	NPDC1	chr9:137007226-137046203	Prone	Prot	OK	57.8564	93.4791	0.692167	2.84031	5e-05	0.00034525	yes
ENSG00000107438.7	ENSG00000107438.7	PDLIM1	chr10:95237571-95291024	Prone	Prot	OK	44.1172	32.7469	-0.429985	-2.27758	5e-05	0.00034525	yes
ENSG00000107554.14	ENSG00000107554.14	DNMBP	chr10:99875576-100009919	Prone	Prot	OK	16.4475	9.34604	-0.815442	-3.46011	5e-05	0.00034525	yes
ENSG00000107625.11	ENSG00000107625.11	DDX50	chr10:68901277-68946847	Prone	Prot	OK	15.1482	12.5192	-0.275	-1.28276	5e-05	0.00034525	yes
ENSG00000107731.11	ENSG00000107731.11	UNC5B	chr10:71212569-71302864	Prone	Prot	OK	3.86241	2.84421	-0.441472	-1.97113	5e-05	0.00034525	yes
ENSG00000107738.18	ENSG00000107738.18	C10orf54	chr10:71396933-71815947	Prone	Prot	OK	6.26732	12.1888	0.959634	2.14143	5e-05	0.00034525	yes
ENSG00000107833.9	ENSG00000107833.9	NPM3	chr10:101781324-101783413	Prone	Prot	OK	19.1792	13.9451	-0.459788	-1.60645	5e-05	0.00034525	yes
ENSG00000107872.11	ENSG00000107872.11	FBXL15	chr10:102402616-102423136	Prone	Prot	OK	2.32275	3.97437	0.774894	1.15913	5e-05	0.00034525	yes
ENSG00000107984.8	ENSG00000107984.8	DKK1	chr10:52314295-52318042	Prone	Prot	OK	10.0231	6.43218	-0.639957	-1.73025	5e-05	0.00034525	yes
ENSG00000108100.16	ENSG00000108100.16	CCNY	chr10:35247024-35572669	Prone	Prot	OK	67.9015	35.0944	-0.952203	-3.63996	5e-05	0.00034525	yes
ENSG00000108175.15	ENSG00000108175.15	ZMIZ1	chr10:79069034-79316528	Prone	Prot	OK	3.70812	8.1782	1.1411	2.09285	5e-05	0.00034525	yes
ENSG00000108219.13	ENSG00000108219.13	TSPAN14	chr10:80454165-80535942	Prone	Prot	OK	61.0192	74.5883	0.289688	1.35001	5e-05	0.00034525	yes
ENSG00000108262.14	ENSG00000108262.14	GIT1	chr17:29560546-30186475	Prone	Prot	OK	16.7486	27.6537	0.723428	1.83949	5e-05	0.00034525	yes
ENSG00000108387.13	ENSG00000108387.13	2016-09-04	chr17:58519836-58692055	Prone	Prot	OK	3.81283	1.85681	-1.03804	-1.30973	5e-05	0.00034525	yes
ENSG00000108406.8	ENSG00000108406.8	DHX40	chr17:59565524-59608345	Prone	Prot	OK	19.5417	16.137	-0.276178	-1.20265	5e-05	0.00034525	yes
ENSG00000108551.4	ENSG00000108551.4	RASD1	chr17:17494436-17496395	Prone	Prot	OK	10.6658	3.10011	-1.7826	-5.41106	5e-05	0.00034525	yes
ENSG00000108602.16	ENSG00000108602.16	ALDH3A1	chr17:19737681-19748943	Prone	Prot	OK	0.465383	2.6142	2.48988	1.17514	5e-05	0.00034525	yes
ENSG00000108622.9	ENSG00000108622.9	ICAM2	chr17:63996070-64020634	Prone	Prot	OK	215.36	281.37	0.385721	2.29749	5e-05	0.00034525	yes
ENSG00000108798.7	ENSG00000108798.7	ABI3	chr17:49202790-49223225	Prone	Prot	OK	7.68666	20.8857	1.44209	5.12008	5e-05	0.00034525	yes
ENSG00000108828.14	ENSG00000108828.14	VAT1	chr17:43014604-43025123	Prone	Prot	OK	173.406	199.364	0.201255	1.193	5e-05	0.00034525	yes
ENSG00000108829.9	ENSG00000108829.9	LRRC59	chr17:50373219-50397888	Prone	Prot	OK	39.2733	34.1096	-0.20337	-1.21483	5e-05	0.00034525	yes
ENSG00000108840.14	ENSG00000108840.14	HDAC5	chr17:44076745-44123702	Prone	Prot	OK	18.3449	30.8149	0.748247	2.07139	5e-05	0.00034525	yes
ENSG00000108861.7	ENSG00000108861.7	DUSP3	chr17:43766120-43778988	Prone	Prot	OK	36.6713	44.5988	0.282353	1.49723	5e-05	0.00034525	yes
ENSG00000108932.10	ENSG00000108932.10	SLC16A6	chr17:68259181-68763882	Prone	Prot	OK	4.44988	0.596207	-2.89988	-1.14291	5e-05	0.00034525	yes
ENSG00000108960.6	ENSG00000108960.6	MMD	chr17:55392612-55421992	Prone	Prot	OK	3.45045	2.44221	-0.498599	-1.26398	5e-05	0.00034525	yes
ENSG00000109079.8	ENSG00000109079.8	TNFAIP1	chr17:28335601-28347009	Prone	Prot	OK	23.3972	29.3688	0.327952	1.71514	5e-05	0.00034525	yes
ENSG00000109089.7	ENSG00000109089.7	CDR2L	chr17:74987631-75005800	Prone	Prot	OK	7.10538	10.4019	0.549865	2.58876	5e-05	0.00034525	yes
ENSG00000109099.12	ENSG00000109099.12	PMP22	chr17:15229776-15265707	Prone	Prot	OK	26.6677	76.9583	1.52898	8.34744	5e-05	0.00034525	yes
ENSG00000109458.7	ENSG00000109458.7	GAB1	chr4:143336761-143474568	Prone	Prot	OK	10.7497	7.17942	-0.582356	-1.41862	5e-05	0.00034525	yes
ENSG00000109654.13	ENSG00000109654.13	TRIM2	chr4:153152341-153339320	Prone	Prot	OK	3.54454	6.31978	0.834277	1.90366	5e-05	0.00034525	yes
ENSG00000109689.13	ENSG00000109689.13	STIM2	chr4:26857677-27025381	Prone	Prot	OK	5.8017	9.65217	0.734378	1.68623	5e-05	0.00034525	yes
ENSG00000109790.15	ENSG00000109790.15	KLHL5	chr4:39045038-39126857	Prone	Prot	OK	24.5641	31.2801	0.348698	1.98928	5e-05	0.00034525	yes
ENSG00000109861.14	ENSG00000109861.14	CTSC	chr11:88293591-88337787	Prone	Prot	OK	57.4083	44.5793	-0.364884	-1.4896	5e-05	0.00034525	yes
ENSG00000110042.6	ENSG00000110042.6	DTX4	chr11:59171429-59212951	Prone	Prot	OK	0.228798	1.10372	2.27023	1.27717	5e-05	0.00034525	yes
ENSG00000110047.16	ENSG00000110047.16	EHD1	chr11:64851641-64888296	Prone	Prot	OK	25.6862	40.624	0.661337	2.66703	5e-05	0.00034525	yes
ENSG00000110080.17	ENSG00000110080.17	ST3GAL4	chr11:126355639-127006058	Prone	Prot	OK	14.2836	11.2953	-0.338636	-1.15704	5e-05	0.00034525	yes
ENSG00000110092.3	ENSG00000110092.3	CCND1	chr11:69641086-69675416	Prone	Prot	OK	28.542	37.5226	0.394673	1.23163	5e-05	0.00034525	yes
ENSG00000110171.17	ENSG00000110171.17	TRIM3	chr11:6448612-6474459	Prone	Prot	OK	6.8385	10.1236	0.565977	1.36936	5e-05	0.00034525	yes
ENSG00000110429.12	ENSG00000110429.12	FBXO3	chr11:33740938-33774543	Prone	Prot	OK	11.4509	14.5462	0.345178	1.41434	5e-05	0.00034525	yes
ENSG00000110492.14	ENSG00000110492.14	MDK	chr11:46380755-46383837	Prone	Prot	OK	90.0507	73.7689	-0.287725	-1.55833	5e-05	0.00034525	yes
ENSG00000110660.13	ENSG00000110660.13	SLC35F2	chr11:107790990-107928293	Prone	Prot	OK	30.6345	21.5392	-0.508191	-2.26749	5e-05	0.00034525	yes
ENSG00000110811.18	ENSG00000110811.18	P3H3	chr12:6821544-6839851	Prone	Prot	OK	41.6525	32.5697	-0.354871	-1.55973	5e-05	0.00034525	yes
ENSG00000110841.12	ENSG00000110841.12	PPFIBP1	chr12:27523430-27695564	Prone	Prot	OK	35.1961	45.531	0.371434	1.367	5e-05	0.00034525	yes
ENSG00000110852.4	ENSG00000110852.4	CLEC2B	chr12:9852983-9870136	Prone	Prot	OK	19.4619	16.3452	-0.251781	-1.14503	5e-05	0.00034525	yes
ENSG00000110880.9	ENSG00000110880.9	CORO1C	chr12:108645108-108731596	Prone	Prot	OK	67.9722	101.011	0.571491	2.53045	5e-05	0.00034525	yes
ENSG00000110888.16	ENSG00000110888.16	CAPRIN2	chr12:30709551-30754951	Prone	Prot	OK	7.8363	11.7022	0.578531	1.42708	5e-05	0.00034525	yes
ENSG00000110931.17	ENSG00000110931.17	CAMKK2	chr12:121237690-121298308	Prone	Prot	OK	11.3043	13.6074	0.267513	1.10191	5e-05	0.00034525	yes
ENSG00000111057.9	ENSG00000111057.9	KRT18	chr12:52897186-52952901	Prone	Prot	OK	43.6451	37.6639	-0.212637	-1.12465	5e-05	0.00034525	yes
ENSG00000111077.16	ENSG00000111077.16	TNS2	chr12:53006157-53079420	Prone	Prot	OK	35.6601	62.7077	0.81433	0.724052	5e-05	0.00034525	yes
ENSG00000111145.6	ENSG00000111145.6	ELK3	chr12:96194381-96269835	Prone	Prot	OK	20.8434	28.3625	0.444391	1.86878	5e-05	0.00034525	yes
ENSG00000111229.14	ENSG00000111229.14	ARPC3	chr12:110372899-110450422	Prone	Prot	OK	153.911	125.113	-0.29887	-1.62653	5e-05	0.00034525	yes
ENSG00000111237.17	ENSG00000111237.17	VPS29	chr12:110491096-110532086	Prone	Prot	OK	46.6245	55.293	0.246009	1.22102	5e-05	0.00034525	yes
ENSG00000111321.9	ENSG00000111321.9	LTBR	chr12:6346842-6391571	Prone	Prot	OK	50.5312	60.1706	0.251883	1.22102	5e-05	0.00034525	yes
ENSG00000111331.11	ENSG00000111331.11	OAS3	chr12:112906776-113017751	Prone	Prot	OK	2.09239	3.60526	0.784952	1.12114	5e-05	0.00034525	yes
ENSG00000111335.11	ENSG00000111335.11	OAS2	chr12:112906776-113017751	Prone	Prot	OK	2.92924	7.53925	1.3639	2.39908	5e-05	0.00034525	yes
ENSG00000111341.8	ENSG00000111341.8	MGP	chr12:14803571-14906586	Prone	Prot	OK	464.856	340.387	-0.449611	-2.00724	5e-05	0.00034525	yes
ENSG00000111348.7	ENSG00000111348.7	ARHGDIB	chr12:14942016-14961728	Prone	Prot	OK	139.103	114.513	-0.280637	-1.76507	5e-05	0.00034525	yes
ENSG00000111371.14	ENSG00000111371.14	SLC38A1	chr12:46183062-46270017	Prone	Prot	OK	31.3498	21.7554	-0.527081	-2.18135	5e-05	0.00034525	yes
ENSG00000111602.10	ENSG00000111602.10	TIMELESS	chr12:56416372-56449403	Prone	Prot	OK	2.7677	4.42852	0.67814	2.091	5e-05	0.00034525	yes
ENSG00000111669.13	ENSG00000111669.13	TPI1	chr12:6867118-6923698	Prone	Prot	OK	357.723	187.154	-0.934617	-5.51581	5e-05	0.00034525	yes
ENSG00000111674.7	ENSG00000111674.7	ENO2	chr12:6867118-6923698	Prone	Prot	OK	15.8617	7.2058	-1.13832	-1.36067	5e-05	0.00034525	yes
ENSG00000111801.14	ENSG00000111801.14	BTN3A3	chr6:26440471-26453415	Prone	Prot	OK	7.32626	9.73178	0.409627	1.26614	5e-05	0.00034525	yes
ENSG00000111885.6	ENSG00000111885.6	MAN1A1	chr6:119177208-119349761	Prone	Prot	OK	14.9184	23.4865	0.654734	3.9291	5e-05	0.00034525	yes
ENSG00000111906.16	ENSG00000111906.16	HDDC2	chr6:125119048-125302078	Prone	Prot	OK	5.8557	3.63577	-0.687582	-1.25234	5e-05	0.00034525	yes
ENSG00000111911.6	ENSG00000111911.6	HINT3	chr6:125956780-125980244	Prone	Prot	OK	8.91158	6.60271	-0.432623	-2.0562	5e-05	0.00034525	yes
ENSG00000112414.13	ENSG00000112414.13	GPR126	chr6:142301853-142446266	Prone	Prot	OK	6.55124	3.7041	-0.822645	-1.72006	5e-05	0.00034525	yes
ENSG00000112473.15	ENSG00000112473.15	SLC39A7	chr6:33193587-33204439	Prone	Prot	OK	41.1738	35.1414	-0.228557	-1.1748	5e-05	0.00034525	yes
ENSG00000112559.12	ENSG00000112559.12	MDFI	chr6:41636881-41654246	Prone	Prot	OK	20.8789	15.3054	-0.448009	-1.70196	5e-05	0.00034525	yes
ENSG00000112576.11	ENSG00000112576.11	CCND3	chr6:41934932-42050357	Prone	Prot	OK	25.1949	53.8103	1.09475	4.03537	5e-05	0.00034525	yes
ENSG00000112697.14	ENSG00000112697.14	TMEM30A	chr6:75252923-75284968	Prone	Prot	OK	289.25	232.244	-0.316674	-1.41355	5e-05	0.00034525	yes
ENSG00000112715.19	ENSG00000112715.19	VEGFA	chr6:43770183-43786487	Prone	Prot	OK	24.5819	7.14974	-1.78164	-4.00172	5e-05	0.00034525	yes
ENSG00000112759.15	ENSG00000112759.15	SLC29A1	chr6:44219504-44234151	Prone	Prot	OK	63.4913	115.698	0.865734	5.28343	5e-05	0.00034525	yes
ENSG00000112893.8	ENSG00000112893.8	MAN2A1	chr5:109689365-109869625	Prone	Prot	OK	37.0983	30.1055	-0.301328	-1.78314	5e-05	0.00034525	yes
ENSG00000112977.14	ENSG00000112977.14	DAP	chr5:10679229-10770294	Prone	Prot	OK	23.7171	33.3719	0.492707	2.28906	5e-05	0.00034525	yes
ENSG00000113083.11	ENSG00000113083.11	LOX	chr5:121961960-122078285	Prone	Prot	OK	60.3936	38.8522	-0.636399	-3.25884	5e-05	0.00034525	yes
ENSG00000113328.17	ENSG00000113328.17	CCNG1	chr5:163437568-163446151	Prone	Prot	OK	142.22	115.613	-0.298828	-1.58977	5e-05	0.00034525	yes
ENSG00000113369.7	ENSG00000113369.7	ARRDC3	chr5:91368723-91439085	Prone	Prot	OK	58.5536	14.3351	-2.0302	-6.98794	5e-05	0.00034525	yes
ENSG00000113384.12	ENSG00000113384.12	GOLPH3	chr5:32124703-32174350	Prone	Prot	OK	39.7799	34.7515	-0.194966	-1.1507	5e-05	0.00034525	yes
ENSG00000113448.15	ENSG00000113448.15	PDE4D	chr5:58969037-60547657	Prone	Prot	OK	15.1535	11.5466	-0.39219	-1.39498	5e-05	0.00034525	yes
ENSG00000113504.18	ENSG00000113504.18	SLC12A7	chr5:1050375-1112035	Prone	Prot	OK	8.29634	11.161	0.42792	1.37526	5e-05	0.00034525	yes
ENSG00000113615.11	ENSG00000113615.11	SEC24A	chr5:134601143-134727823	Prone	Prot	OK	9.9832	6.54763	-0.60853	-1.97048	5e-05	0.00034525	yes
ENSG00000113719.14	ENSG00000113719.14	ERGIC1	chr5:172834274-172952685	Prone	Prot	OK	40.4601	33.2342	-0.283833	-1.55541	5e-05	0.00034525	yes
ENSG00000113739.9	ENSG00000113739.9	STC2	chr5:173314712-173329503	Prone	Prot	OK	5.77175	2.37319	-1.28218	-1.81325	5e-05	0.00034525	yes
ENSG00000113851.12	ENSG00000113851.12	CRBN	chr3:3126915-3179710	Prone	Prot	OK	23.4943	30.0546	0.35528	1.39798	5e-05	0.00034525	yes
ENSG00000114166.7	ENSG00000114166.7	KAT2B	chr3:20040022-20154404	Prone	Prot	OK	10.659	15.3219	0.523533	1.71506	5e-05	0.00034525	yes
ENSG00000114268.10	ENSG00000114268.10	PFKFB4	chr3:48517683-48563773	Prone	Prot	OK	1.70669	0.806281	-1.08185	-0.955419	5e-05	0.00034525	yes
ENSG00000114315.3	ENSG00000114315.3	HES1	chr3:194136144-194138732	Prone	Prot	OK	43.4482	33.8585	-0.359776	-1.96652	5e-05	0.00034525	yes
ENSG00000114346.12	ENSG00000114346.12	ECT2	chr3:172750681-172821474	Prone	Prot	OK	10.2279	13.8509	0.437463	1.27023	5e-05	0.00034525	yes
ENSG00000114354.11	ENSG00000114354.11	TFG	chr3:100709330-100748966	Prone	Prot	OK	34.7526	30.0154	-0.211417	-1.18667	5e-05	0.00034525	yes
ENSG00000114378.15	ENSG00000114378.15	HYAL1	chr3:50299888-50312381	Prone	Prot	OK	1.30888	4.51295	1.78574	2.96983	5e-05	0.00034525	yes
ENSG00000114480.11	ENSG00000114480.11	GBE1	chr3:81489698-81762161	Prone	Prot	OK	62.3185	31.5629	-0.981433	-5.67263	5e-05	0.00034525	yes
ENSG00000114541.13	ENSG00000114541.13	FRMD4B	chr3:69169989-69542583	Prone	Prot	OK	57.0076	87.7273	0.621873	1.94792	5e-05	0.00034525	yes
ENSG00000114698.13	ENSG00000114698.13	PLSCR4	chr3:146192338-146251179	Prone	Prot	OK	103.2	87.1762	-0.243443	-1.31219	5e-05	0.00034525	yes
ENSG00000114735.8	ENSG00000114735.8	HEMK1	chr3:50558024-50596168	Prone	Prot	OK	9.09029	6.41193	-0.503568	-1.48679	5e-05	0.00034525	yes
ENSG00000114770.15	ENSG00000114770.15	ABCC5	chr3:183919933-184018015	Prone	Prot	OK	7.04213	9.43554	0.422093	1.58578	5e-05	0.00034525	yes
ENSG00000114812.11	ENSG00000114812.11	VIPR1	chr3:42489298-42537573	Prone	Prot	OK	2.38594	3.64223	0.610265	0.968726	5e-05	0.00034525	yes
ENSG00000114861.17	ENSG00000114861.17	FOXP1	chr3:70954692-71628558	Prone	Prot	OK	17.1742	29.1352	0.76252	2.23911	5e-05	0.00034525	yes
ENSG00000115129.12	ENSG00000115129.12	TP53I3	chr2:24076525-24201698	Prone	Prot	OK	36.4174	43.5871	0.259271	1.17969	5e-05	0.00034525	yes
ENSG00000115183.12	ENSG00000115183.12	TANC1	chr2:158968633-159232659	Prone	Prot	OK	20.8258	25.8412	0.311303	1.69861	5e-05	0.00034525	yes
ENSG00000115226.8	ENSG00000115226.8	FNDC4	chr2:27491882-27495245	Prone	Prot	OK	21.7338	30.1143	0.470511	2.18104	5e-05	0.00034525	yes
ENSG00000115267.5	ENSG00000115267.5	IFIH1	chr2:162267078-162318703	Prone	Prot	OK	3.97432	5.82945	0.552651	1.97009	5e-05	0.00034525	yes
ENSG00000115275.10	ENSG00000115275.10	MOGS	chr2:74461056-74465410	Prone	Prot	OK	41.7045	33.869	-0.300239	-1.64173	5e-05	0.00034525	yes
ENSG00000115286.18	ENSG00000115286.18	NDUFS7	chr19:1383526-1396467	Prone	Prot	OK	28.9277	38.1188	0.39805	1.49068	5e-05	0.00034525	yes
ENSG00000115306.14	ENSG00000115306.14	SPTBN1	chr2:54456284-54680045	Prone	Prot	OK	143.75	238.923	0.732985	3.1949	5e-05	0.00034525	yes
ENSG00000115363.12	ENSG00000115363.12	EVA1A	chr2:75469301-75569722	Prone	Prot	OK	23.6557	9.80668	-1.27035	-3.10561	5e-05	0.00034525	yes
ENSG00000115380.17	ENSG00000115380.17	EFEMP1	chr2:55865966-55924139	Prone	Prot	OK	658.161	325.145	-1.01736	-4.62133	5e-05	0.00034525	yes
ENSG00000115414.17	ENSG00000115414.17	FN1	chr2:215360439-215436172	Prone	Prot	OK	516.136	742.327	0.524304	1.09047	5e-05	0.00034525	yes
ENSG00000115484.13	ENSG00000115484.13	CCT4	chr2:61868088-62147247	Prone	Prot	OK	77.8766	67.6167	-0.20381	-1.01438	5e-05	0.00034525	yes
ENSG00000115594.10	ENSG00000115594.10	IL1R1	chr2:102064543-102182108	Prone	Prot	OK	2.07598	4.99291	1.26609	2.91261	5e-05	0.00034525	yes
ENSG00000115604.9	ENSG00000115604.9	IL18R1	chr2:102311501-102398775	Prone	Prot	OK	4.34374	9.62638	1.14806	1.97408	5e-05	0.00034525	yes
ENSG00000115641.17	ENSG00000115641.17	FHL2	chr2:105357711-105438513	Prone	Prot	OK	68.5828	43.137	-0.668921	-3.66741	5e-05	0.00034525	yes
ENSG00000115657.11	ENSG00000115657.11	ABCB6	chr2:219209767-219229717	Prone	Prot	OK	11.0802	16.5737	0.580917	1.35002	5e-05	0.00034525	yes
ENSG00000115756.11	ENSG00000115756.11	HPCAL1	chr2:10302888-10427617	Prone	Prot	OK	30.3563	35.4612	0.224247	1.13596	5e-05	0.00034525	yes
ENSG00000115758.11	ENSG00000115758.11	ODC1	chr2:10439967-10448504	Prone	Prot	OK	28.0864	33.5775	0.257621	1.31301	5e-05	0.00034525	yes
ENSG00000115762.15	ENSG00000115762.15	PLEKHB2	chr2:131104846-131353709	Prone	Prot	OK	31.2304	36.4115	0.221446	1.16322	5e-05	0.00034525	yes
ENSG00000115866.9	ENSG00000115866.9	DARS	chr2:135906676-136022593	Prone	Prot	OK	35.5702	21.6671	-0.715164	-3.57889	5e-05	0.00034525	yes
ENSG00000115875.17	ENSG00000115875.17	SRSF7	chr2:38743598-38751494	Prone	Prot	OK	50.3271	39.9489	-0.33318	-1.52005	5e-05	0.00034525	yes
ENSG00000115884.9	ENSG00000115884.9	SDC1	chr2:20200796-20225433	Prone	Prot	OK	0.264049	1.10035	2.05908	0.979051	5e-05	0.00034525	yes
ENSG00000115963.12	ENSG00000115963.12	RND3	chr2:150468194-150539011	Prone	Prot	OK	14.023	8.87728	-0.659605	-1.95682	5e-05	0.00034525	yes
ENSG00000116016.12	ENSG00000116016.12	EPAS1	chr2:46293666-46386703	Prone	Prot	OK	77.737	149.106	0.939662	4.96818	5e-05	0.00034525	yes
ENSG00000116044.14	ENSG00000116044.14	NFE2L2	chr2:177227594-177543836	Prone	Prot	OK	18.3896	23.7742	0.370509	1.10485	5e-05	0.00034525	yes
ENSG00000116106.10	ENSG00000116106.10	EPHA4	chr2:221418026-221574454	Prone	Prot	OK	10.8619	21.6282	0.993637	2.29278	5e-05	0.00034525	yes
ENSG00000116133.10	ENSG00000116133.10	DHCR24	chr1:54849632-54888850	Prone	Prot	OK	10.5709	18.1174	0.777277	4.01824	5e-05	0.00034525	yes
ENSG00000116157.5	ENSG00000116157.5	GPX7	chr1:52602371-52609051	Prone	Prot	OK	16.7661	10.3294	-0.698789	-2.8874	5e-05	0.00034525	yes
ENSG00000116191.16	ENSG00000116191.16	RALGPS2	chr1:178724305-178921841	Prone	Prot	OK	8.33924	4.60584	-0.856453	-1.69544	5e-05	0.00034525	yes
ENSG00000116260.15	ENSG00000116260.15	QSOX1	chr1:180154833-180204030	Prone	Prot	OK	88.0945	73.8888	-0.253696	-1.21143	5e-05	0.00034525	yes
ENSG00000116285.11	ENSG00000116285.11	ERRFI1	chr1:8004403-8026308	Prone	Prot	OK	25.1165	6.59983	-1.92813	-8.35683	5e-05	0.00034525	yes
ENSG00000116478.10	ENSG00000116478.10	HDAC1	chr1:32292085-32333635	Prone	Prot	OK	65.741	86.7246	0.399648	2.03926	5e-05	0.00034525	yes
ENSG00000116584.16	ENSG00000116584.16	ARHGEF2	chr1:155946850-156007070	Prone	Prot	OK	38.6839	52.3063	0.435252	1.73652	5e-05	0.00034525	yes
ENSG00000116675.14	ENSG00000116675.14	DNAJC6	chr1:65248218-65416006	Prone	Prot	OK	1.84016	0.979808	-0.909257	-0.975817	5e-05	0.00034525	yes
ENSG00000116678.17	ENSG00000116678.17	LEPR	chr1:65420586-65641559	Prone	Prot	OK	12.9001	5.1709	-1.3189	-2.44956	5e-05	0.00034525	yes
ENSG00000116679.14	ENSG00000116679.14	IVNS1ABP	chr1:185296387-185317329	Prone	Prot	OK	34.8532	25.1717	-0.469486	-1.80088	5e-05	0.00034525	yes
ENSG00000116711.9	ENSG00000116711.9	PLA2G4A	chr1:186828952-186988981	Prone	Prot	OK	7.35798	9.56775	0.37887	1.87642	5e-05	0.00034525	yes
ENSG00000116717.10	ENSG00000116717.10	GADD45A	chr1:67685060-67688338	Prone	Prot	OK	23.8558	30.2992	0.344939	1.43958	5e-05	0.00034525	yes
ENSG00000116786.10	ENSG00000116786.10	PLEKHM2	chr1:15684331-15749896	Prone	Prot	OK	19.4658	23.6777	0.282586	1.36657	5e-05	0.00034525	yes
ENSG00000116815.14	ENSG00000116815.14	CD58	chr1:116514534-116571039	Prone	Prot	OK	8.06049	12.2257	0.600982	2.10054	5e-05	0.00034525	yes
ENSG00000116918.12	ENSG00000116918.12	TSNAX	chr1:231528652-232041272	Prone	Prot	OK	21.7255	13.7296	-0.662106	-2.40623	5e-05	0.00034525	yes
ENSG00000116954.7	ENSG00000116954.7	RRAGC	chr1:38838197-38941799	Prone	Prot	OK	20.2853	25.6552	0.338818	1.69182	5e-05	0.00034525	yes
ENSG00000116962.13	ENSG00000116962.13	NID1	chr1:235975829-236065162	Prone	Prot	OK	37.3685	57.7374	0.627683	4.00832	5e-05	0.00034525	yes
ENSG00000116991.9	ENSG00000116991.9	SIPA1L2	chr1:232397964-232561558	Prone	Prot	OK	6.10649	2.75747	-1.147	-2.50299	5e-05	0.00034525	yes
ENSG00000117000.8	ENSG00000117000.8	RLF	chr1:40161372-40240921	Prone	Prot	OK	7.39989	4.75705	-0.637439	-3.51013	5e-05	0.00034525	yes
ENSG00000117020.15	ENSG00000117020.15	AKT3	chr1:243256033-243851079	Prone	Prot	OK	31.0144	23.2269	-0.417143	-1.17779	5e-05	0.00034525	yes
ENSG00000117139.15	ENSG00000117139.15	KDM5B	chr1:202724490-202809470	Prone	Prot	OK	16.6334	13.3531	-0.316904	-1.17194	5e-05	0.00034525	yes
ENSG00000117143.12	ENSG00000117143.12	UAP1	chr1:162561505-162599842	Prone	Prot	OK	19.7639	13.6094	-0.538266	-2.35704	5e-05	0.00034525	yes
ENSG00000117226.10	ENSG00000117226.10	GBP3	chr1:89006665-89022894	Prone	Prot	OK	8.27531	12.471	0.591687	2.14703	5e-05	0.00034525	yes
ENSG00000117228.9	ENSG00000117228.9	GBP1	chr1:89052318-89065360	Prone	Prot	OK	6.51251	8.46086	0.377592	1.19583	5e-05	0.00034525	yes
ENSG00000117318.8	ENSG00000117318.8	ID3	chr1:23557917-23559794	Prone	Prot	OK	99.1791	42.3112	-1.229	-6.15586	5e-05	0.00034525	yes
ENSG00000117385.14	ENSG00000117385.14	P3H1	chr1:42746334-42767084	Prone	Prot	OK	53.8135	42.3624	-0.345184	-1.76569	5e-05	0.00034525	yes
ENSG00000117394.18	ENSG00000117394.18	SLC2A1	chr1:42925374-42983358	Prone	Prot	OK	52.2279	9.24231	-2.49849	-7.14564	5e-05	0.00034525	yes
ENSG00000117399.12	ENSG00000117399.12	CDC20	chr1:43358954-43363203	Prone	Prot	OK	6.88425	9.0585	0.395972	1.16649	5e-05	0.00034525	yes
ENSG00000117411.15	ENSG00000117411.15	B4GALT2	chr1:43978942-43991170	Prone	Prot	OK	27.0379	22.1785	-0.285821	-1.22791	5e-05	0.00034525	yes
ENSG00000117448.12	ENSG00000117448.12	AKR1A1	chr1:45550542-45570049	Prone	Prot	OK	70.5462	55.4712	-0.346831	-1.8199	5e-05	0.00034525	yes
ENSG00000117450.12	ENSG00000117450.12	PRDX1	chr1:45493865-45523047	Prone	Prot	OK	299.369	364.18	0.282729	1.77351	5e-05	0.00034525	yes
ENSG00000117461.13	ENSG00000117461.13	PIK3R3	chr1:46040139-46185958	Prone	Prot	OK	3.87525	6.17296	0.671675	1.92884	5e-05	0.00034525	yes
ENSG00000117569.17	ENSG00000117569.17	PTBP2	chr1:96721664-96823738	Prone	Prot	OK	9.14594	13.1061	0.519035	1.54557	5e-05	0.00034525	yes
ENSG00000117586.9	ENSG00000117586.9	TNFSF4	chr1:173183733-173207313	Prone	Prot	OK	4.82047	3.12093	-0.6272	-1.91059	5e-05	0.00034525	yes
ENSG00000117592.8	ENSG00000117592.8	PRDX6	chr1:173477265-173488807	Prone	Prot	OK	100.479	82.1598	-0.290383	-1.67829	5e-05	0.00034525	yes
ENSG00000117632.19	ENSG00000117632.19	STMN1	chr1:25884180-25906991	Prone	Prot	OK	79.9728	96.2749	0.26765	1.63494	5e-05	0.00034525	yes
ENSG00000117643.13	ENSG00000117643.13	MAN1C1	chr1:25617467-25786207	Prone	Prot	OK	5.23412	9.27149	0.824853	3.17712	5e-05	0.00034525	yes
ENSG00000117713.16	ENSG00000117713.16	ARID1A	chr1:26696032-26782104	Prone	Prot	OK	1.91725	2.75401	0.522496	1.24247	5e-05	0.00034525	yes
ENSG00000117724.11	ENSG00000117724.11	CENPF	chr1:214603194-214664588	Prone	Prot	OK	4.54742	6.13821	0.432769	1.39247	5e-05	0.00034525	yes
ENSG00000117758.12	ENSG00000117758.12	STX12	chr1:27773182-27824452	Prone	Prot	OK	32.2009	25.3029	-0.347803	-1.47995	5e-05	0.00034525	yes
ENSG00000117791.14	ENSG00000117791.14	2016-03-02	chr1:220748224-220784815	Prone	Prot	OK	3.96063	6.4256	0.698102	1.22322	5e-05	0.00034525	yes
ENSG00000117868.14	ENSG00000117868.14	ESYT2	chr7:158730994-158830253	Prone	Prot	OK	26.7975	33.0892	0.304261	1.72387	5e-05	0.00034525	yes
ENSG00000117984.11	ENSG00000117984.11	CTSD	chr11:1732409-1764025	Prone	Prot	OK	160.401	203.607	0.344109	2.11949	5e-05	0.00034525	yes
ENSG00000118193.10	ENSG00000118193.10	KIF14	chr1:200551496-200620734	Prone	Prot	OK	1.53735	1.87474	0.286252	1.21276	5e-05	0.00034525	yes
ENSG00000118257.15	ENSG00000118257.15	NRP2	chr2:205681989-205798133	Prone	Prot	OK	30.4586	38.7917	0.348896	1.25228	5e-05	0.00034525	yes
ENSG00000118407.13	ENSG00000118407.13	FILIP1	chr6:75285013-75493738	Prone	Prot	OK	17.0406	8.85884	-0.943783	-5.17965	5e-05	0.00034525	yes
ENSG00000118523.5	ENSG00000118523.5	CTGF	chr6:131948175-132077393	Prone	Prot	OK	296.066	149.58	-0.984997	-5.88042	5e-05	0.00034525	yes
ENSG00000118564.13	ENSG00000118564.13	FBXL5	chr4:15604538-15738313	Prone	Prot	OK	36.1247	49.7028	0.460344	1.98476	5e-05	0.00034525	yes
ENSG00000118600.10	ENSG00000118600.10	TMEM5	chr12:63558912-63823895	Prone	Prot	OK	6.81519	4.84829	-0.491277	-1.48403	5e-05	0.00034525	yes
ENSG00000118680.11	ENSG00000118680.11	MYL12B	chr18:3261908-3278284	Prone	Prot	OK	306.227	226.412	-0.435651	-2.79431	5e-05	0.00034525	yes
ENSG00000118689.13	ENSG00000118689.13	FOXO3	chr6:108559834-108684774	Prone	Prot	OK	6.45486	7.64725	0.244556	1.33815	5e-05	0.00034525	yes
ENSG00000118816.8	ENSG00000118816.8	CCNI	chr4:77047157-77076005	Prone	Prot	OK	74.4659	58.8196	-0.340282	-1.98718	5e-05	0.00034525	yes
ENSG00000118855.17	ENSG00000118855.17	MFSD1	chr3:158696891-158829719	Prone	Prot	OK	41.1471	50.0593	0.282849	1.37217	5e-05	0.00034525	yes
ENSG00000118900.13	ENSG00000118900.13	UBN1	chr16:4803202-4882360	Prone	Prot	OK	14.6801	23.829	0.698854	1.89973	5e-05	0.00034525	yes
ENSG00000119138.4	ENSG00000119138.4	KLF9	chr9:70384596-70414624	Prone	Prot	OK	11.0928	14.9948	0.434841	2.48826	5e-05	0.00034525	yes
ENSG00000119280.15	ENSG00000119280.15	C1orf198	chr1:230837118-230869589	Prone	Prot	OK	6.64407	8.34444	0.328747	1.41829	5e-05	0.00034525	yes
ENSG00000119326.13	ENSG00000119326.13	CTNNAL1	chr9:108934180-109013529	Prone	Prot	OK	54.1249	21.3037	-1.34519	-6.42701	5e-05	0.00034525	yes
ENSG00000119403.12	ENSG00000119403.12	PHF19	chr9:120855651-120894896	Prone	Prot	OK	15.0235	21.2408	0.499616	1.54303	5e-05	0.00034525	yes
ENSG00000119408.15	ENSG00000119408.15	NEK6	chr9:124257605-124353307	Prone	Prot	OK	15.4904	10.962	-0.498864	-1.90525	5e-05	0.00034525	yes
ENSG00000119630.12	ENSG00000119630.12	PGF	chr14:74941833-74955784	Prone	Prot	OK	475.018	275.132	-0.787859	-4.66917	5e-05	0.00034525	yes
ENSG00000119669.4	ENSG00000119669.4	IRF2BPL	chr14:77024542-77031572	Prone	Prot	OK	6.97841	13.3749	0.938556	4.30465	5e-05	0.00034525	yes
ENSG00000119673.13	ENSG00000119673.13	ACOT2	chr14:73567619-73575658	Prone	Prot	OK	2.51104	4.13943	0.721148	1.63706	5e-05	0.00034525	yes
ENSG00000119711.11	ENSG00000119711.11	ALDH6A1	chr14:73851843-74084493	Prone	Prot	OK	10.7901	6.85307	-0.654889	-1.64318	5e-05	0.00034525	yes
ENSG00000119714.9	ENSG00000119714.9	GPR68	chr14:91232531-91253925	Prone	Prot	OK	1.07196	2.07457	0.952558	1.57809	5e-05	0.00034525	yes
ENSG00000119718.9	ENSG00000119718.9	EIF2B2	chr14:75002910-75012851	Prone	Prot	OK	92.3264	68.6521	-0.427439	-2.11981	5e-05	0.00034525	yes
ENSG00000119777.17	ENSG00000119777.17	TMEM214	chr2:27032909-27041695	Prone	Prot	OK	23.1173	17.6024	-0.3932	-1.37731	5e-05	0.00034525	yes
ENSG00000119862.11	ENSG00000119862.11	LGALSL	chr2:64453968-64461381	Prone	Prot	OK	2.41783	4.22439	0.805033	1.7712	5e-05	0.00034525	yes
ENSG00000119900.7	ENSG00000119900.7	OGFRL1	chr6:71221456-71420769	Prone	Prot	OK	4.07877	2.98718	-0.449351	-1.21254	5e-05	0.00034525	yes
ENSG00000119917.12	ENSG00000119917.12	IFIT3	chr10:89213568-89414557	Prone	Prot	OK	2.36417	4.75024	1.00667	1.35048	5e-05	0.00034525	yes
ENSG00000119922.8	ENSG00000119922.8	IFIT2	chr10:89213568-89414557	Prone	Prot	OK	1.57684	3.48924	1.14588	1.63749	5e-05	0.00034525	yes
ENSG00000119950.19	ENSG00000119950.19	MXI1	chr10:110207604-110287365	Prone	Prot	OK	10.641	5.01574	-1.08509	-4.38897	5e-05	0.00034525	yes
ENSG00000119977.19	ENSG00000119977.19	TCTN3	chr10:95663395-95694143	Prone	Prot	OK	19.6199	27.2232	0.472521	1.55529	5e-05	0.00034525	yes
ENSG00000119986.6	ENSG00000119986.6	AVPI1	chr10:97677423-97687323	Prone	Prot	OK	1.17637	2.39238	1.0241	1.96395	5e-05	0.00034525	yes
ENSG00000120129.5	ENSG00000120129.5	DUSP1	chr5:172758225-172777774	Prone	Prot	OK	25.1933	30.7687	0.288421	1.53668	5e-05	0.00034525	yes
ENSG00000120156.19	ENSG00000120156.19	TEK	chr9:27109140-27230175	Prone	Prot	OK	38.2785	63.9874	0.741253	4.70748	5e-05	0.00034525	yes
ENSG00000120254.14	ENSG00000120254.14	MTHFD1L	chr6:150865548-151228447	Prone	Prot	OK	19.9213	13.2818	-0.584862	-1.8951	5e-05	0.00034525	yes
ENSG00000120256.8	ENSG00000120256.8	LRP11	chr6:149724314-149923121	Prone	Prot	OK	11.0955	17.9937	0.697508	1.38896	5e-05	0.00034525	yes
ENSG00000120279.6	ENSG00000120279.6	MYCT1	chr6:152697894-152724567	Prone	Prot	OK	60.5199	49.5527	-0.288445	-1.71328	5e-05	0.00034525	yes
ENSG00000120526.9	ENSG00000120526.9	NUDCD1	chr8:109240918-109345953	Prone	Prot	OK	15.021	11.283	-0.41283	-1.53079	5e-05	0.00034525	yes
ENSG00000120594.15	ENSG00000120594.15	PLXDC2	chr10:19816238-20289856	Prone	Prot	OK	1.49948	0.936643	-0.678894	-1.50125	5e-05	0.00034525	yes
ENSG00000120693.12	ENSG00000120693.12	SMAD9	chr13:36844830-36920765	Prone	Prot	OK	1.70706	2.61898	0.617488	1.50209	5e-05	0.00034525	yes
ENSG00000120694.18	ENSG00000120694.18	HSPH1	chr13:31134973-31162388	Prone	Prot	OK	21.9449	30.1457	0.458063	2.35301	5e-05	0.00034525	yes
ENSG00000120742.9	ENSG00000120742.9	SERP1	chr3:150541993-150630445	Prone	Prot	OK	60.2691	46.9579	-0.360053	-1.20653	5e-05	0.00034525	yes
ENSG00000120802.12	ENSG00000120802.12	TMPO	chr12:98512972-98550379	Prone	Prot	OK	25.0833	30.9856	0.304871	1.29002	5e-05	0.00034525	yes
ENSG00000120805.12	ENSG00000120805.12	ARL1	chr12:101393119-101407820	Prone	Prot	OK	27.3482	22.9231	-0.254644	-1.1792	5e-05	0.00034525	yes
ENSG00000120820.11	ENSG00000120820.11	GLT8D2	chr12:103988983-104064183	Prone	Prot	OK	3.40513	6.09555	0.840048	2.19702	5e-05	0.00034525	yes
ENSG00000120833.12	ENSG00000120833.12	SOCS2	chr12:93542462-93583487	Prone	Prot	OK	6.30372	8.5839	0.445431	1.25155	5e-05	0.00034525	yes
ENSG00000120837.6	ENSG00000120837.6	NFYB	chr12:104117076-104138289	Prone	Prot	OK	8.59772	11.8661	0.464816	1.71766	5e-05	0.00034525	yes
ENSG00000120889.11	ENSG00000120889.11	TNFRSF10B	chr8:22687658-23083619	Prone	Prot	OK	113.699	71.7157	-0.664857	-3.13434	5e-05	0.00034525	yes
ENSG00000120896.12	ENSG00000120896.12	SORBS3	chr8:22440818-22575788	Prone	Prot	OK	8.67439	11.7022	0.431939	0.969683	5e-05	0.00034525	yes
ENSG00000120913.22	ENSG00000120913.22	PDLIM2	chr8:22578278-22604150	Prone	Prot	OK	39.7924	24.1992	-0.717534	-1.78627	5e-05	0.00034525	yes
ENSG00000121060.13	ENSG00000121060.13	TRIM25	chr17:56887908-56914038	Prone	Prot	OK	19.2688	35.1746	0.868271	2.30665	5e-05	0.00034525	yes
ENSG00000121310.15	ENSG00000121310.15	ECHDC2	chr1:52895909-52927212	Prone	Prot	OK	17.0208	11.3255	-0.587721	-1.63066	5e-05	0.00034525	yes
ENSG00000121671.10	ENSG00000121671.10	CRY2	chr11:45847117-45883248	Prone	Prot	OK	3.34248	4.85407	0.538275	1.00735	5e-05	0.00034525	yes
ENSG00000121691.4	ENSG00000121691.4	CAT	chr11:34438924-34472062	Prone	Prot	OK	22.5955	28.4898	0.334406	1.37993	5e-05	0.00034525	yes
ENSG00000121858.9	ENSG00000121858.9	TNFSF10	chr3:172505507-172523507	Prone	Prot	OK	23.4496	36.6422	0.64394	3.40296	5e-05	0.00034525	yes
ENSG00000121966.6	ENSG00000121966.6	CXCR4	chr2:136114348-136118165	Prone	Prot	OK	182.194	40.4249	-2.17216	-12.9974	5e-05	0.00034525	yes
ENSG00000122026.9	ENSG00000122026.9	RPL21	chr13:27251308-27256691	Prone	Prot	OK	579.442	505.435	-0.197139	-1.25691	5e-05	0.00034525	yes
ENSG00000122218.13	ENSG00000122218.13	COPA	chr1:160289272-160358952	Prone	Prot	OK	59.3213	48.0145	-0.305079	-1.30452	5e-05	0.00034525	yes
ENSG00000122359.16	ENSG00000122359.16	ANXA11	chr10:80150888-80205572	Prone	Prot	OK	38.0723	55.3716	0.540402	1.77025	5e-05	0.00034525	yes
ENSG00000122378.12	ENSG00000122378.12	FAM213A	chr10:80407828-80437115	Prone	Prot	OK	202.262	166.248	-0.282883	-1.55947	5e-05	0.00034525	yes
ENSG00000122386.9	ENSG00000122386.9	ZNF205	chr16:3110459-3142805	Prone	Prot	OK	12.4864	17.0408	0.448639	1.62963	5e-05	0.00034525	yes
ENSG00000122515.13	ENSG00000122515.13	ZMIZ2	chr7:44748580-44769881	Prone	Prot	OK	7.16923	11.3363	0.661064	1.67429	5e-05	0.00034525	yes
ENSG00000122565.17	ENSG00000122565.17	CBX3	chr7:26189926-26213356	Prone	Prot	OK	105.354	85.095	-0.308099	-1.30267	5e-05	0.00034525	yes
ENSG00000122641.9	ENSG00000122641.9	INHBA	chr7:41667167-41779388	Prone	Prot	OK	14.712	4.89214	-1.58846	-6.68247	5e-05	0.00034525	yes
ENSG00000122644.11	ENSG00000122644.11	ARL4A	chr7:12686855-12690934	Prone	Prot	OK	28.3413	44.85	0.662202	3.1191	5e-05	0.00034525	yes
ENSG00000122694.14	ENSG00000122694.14	GLIPR2	chr9:36136535-36163913	Prone	Prot	OK	2.9636	4.58433	0.62936	1.78105	5e-05	0.00034525	yes
ENSG00000122862.4	ENSG00000122862.4	SRGN	chr10:69088105-69104811	Prone	Prot	OK	183.457	283.81	0.629486	4.02319	5e-05	0.00034525	yes
ENSG00000122863.5	ENSG00000122863.5	CHST3	chr10:71964364-72013564	Prone	Prot	OK	3.32862	4.2938	0.367329	1.75395	5e-05	0.00034525	yes
ENSG00000122884.11	ENSG00000122884.11	P4HA1	chr10:73007216-73096974	Prone	Prot	OK	45.2222	17.3881	-1.37893	-7.0574	5e-05	0.00034525	yes
ENSG00000123080.9	ENSG00000123080.9	CDKN2C	chr1:50960744-50974633	Prone	Prot	OK	6.45411	8.43014	0.385339	1.31487	5e-05	0.00034525	yes
ENSG00000123131.11	ENSG00000123131.11	PRDX4	chrX:23664261-23686399	Prone	Prot	OK	94.9409	81.1181	-0.227006	-1.29779	5e-05	0.00034525	yes
ENSG00000123136.13	ENSG00000123136.13	DDX39A	chr19:14408818-14419383	Prone	Prot	OK	33.0655	39.659	0.262322	1.18578	5e-05	0.00034525	yes
ENSG00000123146.18	ENSG00000123146.18	CD97	chr19:14380500-14408725	Prone	Prot	OK	1.92499	3.27384	0.766136	0.893183	5e-05	0.00034525	yes
ENSG00000123159.14	ENSG00000123159.14	GIPC1	chr19:14477759-14496149	Prone	Prot	OK	45.12	61.5314	0.447555	2.1757	5e-05	0.00034525	yes
ENSG00000123179.12	ENSG00000123179.12	EBPL	chr13:49660722-49691475	Prone	Prot	OK	57.2265	72.1681	0.334679	1.72749	5e-05	0.00034525	yes
ENSG00000123473.14	ENSG00000123473.14	STIL	chr1:47250138-47314147	Prone	Prot	OK	1.91842	3.27074	0.769696	1.52021	5e-05	0.00034525	yes
ENSG00000123607.13	ENSG00000123607.13	TTC21B	chr2:165857474-165953843	Prone	Prot	OK	8.50946	5.67027	-0.58565	-1.64365	5e-05	0.00034525	yes
ENSG00000123609.9	ENSG00000123609.9	NMI	chr2:151270464-151290057	Prone	Prot	OK	6.64564	9.3699	0.495625	1.56204	5e-05	0.00034525	yes
ENSG00000123700.4	ENSG00000123700.4	KCNJ2	chr17:70166960-70180048	Prone	Prot	OK	3.47698	2.80696	-0.308826	-1.19005	5e-05	0.00034525	yes
ENSG00000123728.8	ENSG00000123728.8	RAP2C	chrX:132203023-132489968	Prone	Prot	OK	13.1657	10.7024	-0.298852	-1.35173	5e-05	0.00034525	yes
ENSG00000123933.13	ENSG00000123933.13	MXD4	chr4:2247431-2262294	Prone	Prot	OK	41.2158	51.57	0.323333	1.47301	5e-05	0.00034525	yes
ENSG00000124098.9	ENSG00000124098.9	FAM210B	chr20:56358914-56368663	Prone	Prot	OK	28.8059	34.3614	0.254424	1.39989	5e-05	0.00034525	yes
ENSG00000124126.12	ENSG00000124126.12	PREX1	chr20:48624251-48849458	Prone	Prot	OK	33.4629	45.0766	0.429817	1.50861	5e-05	0.00034525	yes
ENSG00000124151.17	ENSG00000124151.17	NCOA3	chr20:47501901-47786616	Prone	Prot	OK	9.08546	12.1236	0.416184	0.983829	5e-05	0.00034525	yes
ENSG00000124201.13	ENSG00000124201.13	ZNFX1	chr20:49219294-49295738	Prone	Prot	OK	11.5953	18.6364	0.684579	3.01103	5e-05	0.00034525	yes
ENSG00000124212.5	ENSG00000124212.5	PTGIS	chr20:49503873-49568146	Prone	Prot	OK	11.8359	5.88377	-1.00836	-3.62468	5e-05	0.00034525	yes
ENSG00000124216.3	ENSG00000124216.3	SNAI1	chr20:49982998-49988886	Prone	Prot	OK	3.84463	2.42906	-0.662447	-1.66069	5e-05	0.00034525	yes
ENSG00000124299.12	ENSG00000124299.12	PEPD	chr19:33386949-33521794	Prone	Prot	OK	44.7071	55.1997	0.304158	1.59321	5e-05	0.00034525	yes
ENSG00000124370.9	ENSG00000124370.9	MCEE	chr2:71109683-71130239	Prone	Prot	OK	6.77983	4.66444	-0.539545	-1.31046	5e-05	0.00034525	yes
ENSG00000124588.18	ENSG00000124588.18	NQO2	chr6:2987966-3028869	Prone	Prot	OK	12.8051	17.1995	0.425656	1.31954	5e-05	0.00034525	yes
ENSG00000124593.13	ENSG00000124593.13	PRICKLE4	chr6:41770175-41895361	Prone	Prot	OK	9.55132	27.8817	1.54555	4.53727	5e-05	0.00034525	yes
ENSG00000124749.15	ENSG00000124749.15	COL21A1	chr6:56056589-56394094	Prone	Prot	OK	1.42042	0.559966	-1.34291	-0.809435	5e-05	0.00034525	yes
ENSG00000124762.12	ENSG00000124762.12	CDKN1A	chr6:36676459-36687339	Prone	Prot	OK	47.0829	60.5139	0.362064	2.03028	5e-05	0.00034525	yes
ENSG00000124766.5	ENSG00000124766.5	SOX4	chr6:21592768-21598619	Prone	Prot	OK	63.9462	40.2594	-0.667534	-4.27677	5e-05	0.00034525	yes
ENSG00000124767.6	ENSG00000124767.6	GLO1	chr6:38675924-38703141	Prone	Prot	OK	55.6195	46.8674	-0.247008	-1.50291	5e-05	0.00034525	yes
ENSG00000124772.10	ENSG00000124772.10	CPNE5	chr6:36740774-36840002	Prone	Prot	OK	6.05509	3.38201	-0.840267	-3.2407	5e-05	0.00034525	yes
ENSG00000124785.7	ENSG00000124785.7	NRN1	chr6:5997998-6007605	Prone	Prot	OK	41.3933	31.092	-0.412853	-2.27211	5e-05	0.00034525	yes
ENSG00000124831.17	ENSG00000124831.17	LRRFIP1	chr2:237627575-237842808	Prone	Prot	OK	77.5774	107.876	0.475659	1.88099	5e-05	0.00034525	yes
ENSG00000125148.6	ENSG00000125148.6	MT2A	chr16:56608198-56609497	Prone	Prot	OK	78.1848	44.8478	-0.801849	-3.55984	5e-05	0.00034525	yes
ENSG00000125257.12	ENSG00000125257.12	ABCC4	chr13:95019828-95301446	Prone	Prot	OK	6.60001	8.68788	0.396535	1.52497	5e-05	0.00034525	yes
ENSG00000125266.6	ENSG00000125266.6	EFNB2	chr13:106489730-106535114	Prone	Prot	OK	39.2564	33.0243	-0.249401	-1.57897	5e-05	0.00034525	yes
ENSG00000125347.12	ENSG00000125347.12	IRF1	chr5:132481608-132490798	Prone	Prot	OK	5.52979	12.5336	1.1805	3.48863	5e-05	0.00034525	yes
ENSG00000125378.14	ENSG00000125378.14	BMP4	chr14:53949735-53958761	Prone	Prot	OK	38.2666	18.964	-1.01282	-3.04644	5e-05	0.00034525	yes
ENSG00000125629.13	ENSG00000125629.13	INSIG2	chr2:118088451-118110997	Prone	Prot	OK	12.6161	6.85354	-0.880344	-2.42579	5e-05	0.00034525	yes
ENSG00000125810.9	ENSG00000125810.9	CD93	chr20:23079348-23086340	Prone	Prot	OK	190.795	125.266	-0.607024	-3.54401	5e-05	0.00034525	yes
ENSG00000125817.7	ENSG00000125817.7	CENPB	chr20:3783850-3786690	Prone	Prot	OK	30.0433	40.5427	0.4324	2.53227	5e-05	0.00034525	yes
ENSG00000125843.9	ENSG00000125843.9	AP5S1	chr20:3808356-3828837	Prone	Prot	OK	6.03417	8.92372	0.564491	1.68644	5e-05	0.00034525	yes
ENSG00000125844.14	ENSG00000125844.14	RRBP1	chr20:17613677-17682295	Prone	Prot	OK	58.4504	49.092	-0.251724	-1.18308	5e-05	0.00034525	yes
ENSG00000125845.6	ENSG00000125845.6	BMP2	chr20:6767663-6780280	Prone	Prot	OK	7.41845	6.22824	-0.252295	-1.19386	5e-05	0.00034525	yes
ENSG00000125864.10	ENSG00000125864.10	BFSP1	chr20:17493904-17569220	Prone	Prot	OK	2.49257	4.36635	0.808792	2.30491	5e-05	0.00034525	yes
ENSG00000125868.14	ENSG00000125868.14	DSTN	chr20:17569862-17609919	Prone	Prot	OK	119.29	156.238	0.389268	2.26932	5e-05	0.00034525	yes
ENSG00000125910.5	ENSG00000125910.5	S1PR4	chr19:3172345-3180332	Prone	Prot	OK	1.16132	2.49864	1.10538	1.40629	5e-05	0.00034525	yes
ENSG00000125945.13	ENSG00000125945.13	ZNF436	chr1:23359447-23371839	Prone	Prot	OK	8.2372	11.3889	0.467397	2.40438	5e-05	0.00034525	yes
ENSG00000125968.8	ENSG00000125968.8	ID1	chr20:31605282-31606515	Prone	Prot	OK	19.9281	68.197	1.7749	7.92415	5e-05	0.00034525	yes
ENSG00000126254.10	ENSG00000126254.10	RBM42	chr19:35629029-35637686	Prone	Prot	OK	21.8153	26.3583	0.272915	1.31926	5e-05	0.00034525	yes
ENSG00000126261.11	ENSG00000126261.11	UBA2	chr19:34428351-34471251	Prone	Prot	OK	44.9179	34.3416	-0.387334	-1.30532	5e-05	0.00034525	yes
ENSG00000126351.11	ENSG00000126351.11	THRA	chr17:40019096-40100725	Prone	Prot	OK	8.5481	11.2064	0.390649	1.06643	5e-05	0.00034525	yes
ENSG00000126391.12	ENSG00000126391.12	FRMD8	chr11:65386598-65413525	Prone	Prot	OK	23.0811	37.2999	0.692459	2.78696	5e-05	0.00034525	yes
ENSG00000126457.19	ENSG00000126457.19	PRMT1	chr19:49675785-49690575	Prone	Prot	OK	75.9064	64.08	-0.244348	-1.21333	5e-05	0.00034525	yes
ENSG00000126524.8	ENSG00000126524.8	SBDS	chr7:66987676-67239519	Prone	Prot	OK	27.415	32.5961	0.249734	1.27991	5e-05	0.00034525	yes
ENSG00000126709.13	ENSG00000126709.13	IFI6	chr1:27666060-27703063	Prone	Prot	OK	15.8682	24.5824	0.631484	2.08734	5e-05	0.00034525	yes
ENSG00000126759.11	ENSG00000126759.11	CFP	chrX:47624212-47630305	Prone	Prot	OK	0.4479	1.90556	2.08897	1.39055	5e-05	0.00034525	yes
ENSG00000126785.11	ENSG00000126785.11	RHOJ	chr14:63204113-63293219	Prone	Prot	OK	79.8947	61.1679	-0.385324	-1.32871	5e-05	0.00034525	yes
ENSG00000126803.9	ENSG00000126803.9	HSPA2	chr14:64388030-64546173	Prone	Prot	OK	0.875385	2.3469	1.42277	0.95624	5e-05	0.00034525	yes
ENSG00000126878.11	ENSG00000126878.11	AIF1L	chr9:131096475-131123152	Prone	Prot	OK	31.4084	53.861	0.778091	4.55206	5e-05	0.00034525	yes
ENSG00000127511.8	ENSG00000127511.8	SIN3B	chr19:16829399-16880353	Prone	Prot	OK	22.8004	31.3339	0.458664	1.72698	5e-05	0.00034525	yes
ENSG00000127526.12	ENSG00000127526.12	SLC35E1	chr19:16479056-16660442	Prone	Prot	OK	13.3371	10.0182	-0.412824	-1.00147	5e-05	0.00034525	yes
ENSG00000127528.5	ENSG00000127528.5	KLF2	chr19:16324816-16327874	Prone	Prot	OK	3.94787	55.3465	3.80935	11.4564	5e-05	0.00034525	yes
ENSG00000127533.3	ENSG00000127533.3	F2RL3	chr19:16888859-16892606	Prone	Prot	OK	4.6562	8.97848	0.947317	1.99011	5e-05	0.00034525	yes
ENSG00000127663.13	ENSG00000127663.13	KDM4B	chr19:4969112-5153595	Prone	Prot	OK	12.0069	9.622	-0.319449	-1.25403	5e-05	0.00034525	yes
ENSG00000127824.12	ENSG00000127824.12	TUBA4A	chr2:219229756-219278170	Prone	Prot	OK	6.1405	10.7645	0.809858	1.4013	5e-05	0.00034525	yes
ENSG00000127920.5	ENSG00000127920.5	GNG11	chr7:93921698-93928610	Prone	Prot	OK	163.99	120.757	-0.441501	-2.81124	5e-05	0.00034525	yes
ENSG00000127946.15	ENSG00000127946.15	HIP1	chr7:75533299-75738962	Prone	Prot	OK	8.11902	11.4905	0.501063	1.36004	5e-05	0.00034525	yes
ENSG00000128050.7	ENSG00000128050.7	PAICS	chr4:56435740-56464579	Prone	Prot	OK	21.1224	17.0662	-0.30763	-1.13779	5e-05	0.00034525	yes
ENSG00000128052.8	ENSG00000128052.8	KDR	chr4:55053059-55125589	Prone	Prot	OK	76.4689	122.323	0.677752	3.35903	5e-05	0.00034525	yes
ENSG00000128245.13	ENSG00000128245.13	YWHAH	chr22:31933520-31957603	Prone	Prot	OK	30.2508	46.8982	0.632563	3.63205	5e-05	0.00034525	yes
ENSG00000128271.18	ENSG00000128271.18	ADORA2A	chr22:24270816-24528390	Prone	Prot	OK	47.0621	22.3941	-1.07145	-2.67095	5e-05	0.00034525	yes
ENSG00000128272.13	ENSG00000128272.13	ATF4	chr22:39519694-39522685	Prone	Prot	OK	128.843	95.7954	-0.427584	-2.69983	5e-05	0.00034525	yes
ENSG00000128284.18	ENSG00000128284.18	APOL3	chr22:36140329-36166177	Prone	Prot	OK	19.673	45.5206	1.2103	4.28491	5e-05	0.00034525	yes
ENSG00000128294.14	ENSG00000128294.14	TPST2	chr22:26521982-26596717	Prone	Prot	OK	32.9664	42.7855	0.376125	1.74105	5e-05	0.00034525	yes
ENSG00000128335.12	ENSG00000128335.12	APOL2	chr22:36226202-36239954	Prone	Prot	OK	14.1034	19.6118	0.475677	1.7909	5e-05	0.00034525	yes
ENSG00000128567.15	ENSG00000128567.15	PODXL	chr7:131500261-131558217	Prone	Prot	OK	89.5961	150.806	0.751184	3.54947	5e-05	0.00034525	yes
ENSG00000128578.8	ENSG00000128578.8	STRIP2	chr7:129434432-129488399	Prone	Prot	OK	1.45749	2.46694	0.759238	1.70088	5e-05	0.00034525	yes
ENSG00000128591.14	ENSG00000128591.14	FLNC	chr7:128830376-128910719	Prone	Prot	OK	22.6587	33.1741	0.549989	2.54386	5e-05	0.00034525	yes
ENSG00000128602.8	ENSG00000128602.8	SMO	chr7:129188871-129213545	Prone	Prot	OK	2.78722	1.73441	-0.684381	-1.39687	5e-05	0.00034525	yes
ENSG00000128641.16	ENSG00000128641.16	MYO1B	chr2:191229164-191425389	Prone	Prot	OK	16.1059	9.0111	-0.837817	-2.81076	5e-05	0.00034525	yes
ENSG00000128654.12	ENSG00000128654.12	MTX2	chr2:176269394-176338025	Prone	Prot	OK	14.6133	10.4559	-0.482969	-1.98398	5e-05	0.00034525	yes
ENSG00000128656.12	ENSG00000128656.12	CHN1	chr2:174799362-175005369	Prone	Prot	OK	8.01716	13.937	0.797758	2.46427	5e-05	0.00034525	yes
ENSG00000128849.10	ENSG00000128849.10	CGNL1	chr15:57375966-57550727	Prone	Prot	OK	19.4603	23.1553	0.250807	1.35309	5e-05	0.00034525	yes
ENSG00000128917.6	ENSG00000128917.6	DLL4	chr15:40929339-40939072	Prone	Prot	OK	94.3221	54.2746	-0.797319	-4.55214	5e-05	0.00034525	yes
ENSG00000129048.6	ENSG00000129048.6	ACKR4	chr3:132558137-132874223	Prone	Prot	OK	1.95396	3.94881	1.01502	1.21257	5e-05	0.00034525	yes
ENSG00000129083.11	ENSG00000129083.11	COPB1	chr11:14443439-14643635	Prone	Prot	OK	82.2031	66.8731	-0.297766	-1.41075	5e-05	0.00034525	yes
ENSG00000129250.10	ENSG00000129250.10	KIF1C	chr17:4997947-5028401	Prone	Prot	OK	59.8003	83.0969	0.474641	1.4558	5e-05	0.00034525	yes
ENSG00000129353.13	ENSG00000129353.13	SLC44A2	chr19:10602456-10644559	Prone	Prot	OK	43.5826	52.2442	0.26152	1.14808	5e-05	0.00034525	yes
ENSG00000129355.6	ENSG00000129355.6	CDKN2D	chr19:10566461-10569059	Prone	Prot	OK	2.64983	6.34857	1.26053	2.91097	5e-05	0.00034525	yes
ENSG00000129422.12	ENSG00000129422.12	MTUS1	chr8:17576432-17800917	Prone	Prot	OK	157.73	122.75	-0.361735	-1.47755	5e-05	0.00034525	yes
ENSG00000129467.12	ENSG00000129467.12	ADCY4	chr14:24318348-24340045	Prone	Prot	OK	29.8606	60.2503	1.01273	3.30784	5e-05	0.00034525	yes
ENSG00000129474.14	ENSG00000129474.14	AJUBA	chr14:22929608-22982642	Prone	Prot	OK	14.0514	9.43573	-0.574512	-1.53665	5e-05	0.00034525	yes
ENSG00000129521.12	ENSG00000129521.12	EGLN3	chr14:33924230-34462774	Prone	Prot	OK	15.4509	0.689733	-4.48551	-3.62031	5e-05	0.00034525	yes
ENSG00000129538.12	ENSG00000129538.12	RNASE1	chr14:20801227-20803278	Prone	Prot	OK	119.116	259.929	1.12575	6.67227	5e-05	0.00034525	yes
ENSG00000129562.9	ENSG00000129562.9	DAD1	chr14:22564904-22589269	Prone	Prot	OK	191.462	165.364	-0.211415	-1.25893	5e-05	0.00034525	yes
ENSG00000129657.13	ENSG00000129657.13	SEC14L1	chr17:77086715-77217101	Prone	Prot	OK	169.242	123.196	-0.458136	-1.50433	5e-05	0.00034525	yes
ENSG00000129757.11	ENSG00000129757.11	CDKN1C	chr11:2883212-2885881	Prone	Prot	OK	5.01839	2.0986	-1.2578	-2.26522	5e-05	0.00034525	yes
ENSG00000129824.14	ENSG00000129824.14	RPS4Y1	chrY:2841485-2932000	Prone	Prot	OK	249.225	212.159	-0.232303	-1.4215	5e-05	0.00034525	yes
ENSG00000130024.13	ENSG00000130024.13	PHF10	chr6:169702189-169738992	Prone	Prot	OK	33.3388	17.4439	-0.934481	-3.61276	5e-05	0.00034525	yes
ENSG00000130052.12	ENSG00000130052.12	STARD8	chrX:68647665-68725842	Prone	Prot	OK	7.0895	14.3404	1.01633	4.23157	5e-05	0.00034525	yes
ENSG00000130066.15	ENSG00000130066.15	SAT1	chrX:23783172-23786226	Prone	Prot	OK	209.95	126.814	-0.727334	-4.53099	5e-05	0.00034525	yes
ENSG00000130164.10	ENSG00000130164.10	LDLR	chr19:11089361-11155808	Prone	Prot	OK	9.65783	20.7777	1.10527	3.12078	5e-05	0.00034525	yes
ENSG00000130202.8	ENSG00000130202.8	PVRL2	chr19:44846174-44903689	Prone	Prot	OK	39.83	47.8461	0.264544	1.24877	5e-05	0.00034525	yes
ENSG00000130300.7	ENSG00000130300.7	PLVAP	chr19:17351447-17377350	Prone	Prot	OK	3.39883	8.07502	1.24843	2.3822	5e-05	0.00034525	yes
ENSG00000130303.11	ENSG00000130303.11	BST2	chr19:17402938-17405648	Prone	Prot	OK	38.9516	47.1184	0.274607	1.29977	5e-05	0.00034525	yes
ENSG00000130309.9	ENSG00000130309.9	COLGALT1	chr19:17555593-17583162	Prone	Prot	OK	53.9389	71.3444	0.403474	2.098	5e-05	0.00034525	yes
ENSG00000130340.13	ENSG00000130340.13	SNX9	chr6:157700386-157945077	Prone	Prot	OK	24.8731	19.5304	-0.348861	-2.08876	5e-05	0.00034525	yes
ENSG00000130429.11	ENSG00000130429.11	ARPC1B	chr7:99325897-99466331	Prone	Prot	OK	182.275	240.772	0.40155	1.57373	5e-05	0.00034525	yes
ENSG00000130449.5	ENSG00000130449.5	ZSWIM6	chr5:61332272-61546170	Prone	Prot	OK	7.65362	5.49661	-0.4776	-2.43284	5e-05	0.00034525	yes
ENSG00000130513.6	ENSG00000130513.6	GDF15	chr19:18374730-18389176	Prone	Prot	OK	58.0852	49.5082	-0.230504	-1.20051	5e-05	0.00034525	yes
ENSG00000130522.5	ENSG00000130522.5	JUND	chr19:18279759-18281622	Prone	Prot	OK	11.9342	21.2259	0.830724	3.15242	5e-05	0.00034525	yes
ENSG00000130584.9	ENSG00000130584.9	ZBTB46	chr20:63743665-63831244	Prone	Prot	OK	4.30808	8.29537	0.945262	2.48585	5e-05	0.00034525	yes
ENSG00000130589.15	ENSG00000130589.15	HELZ2	chr20:63558085-63574239	Prone	Prot	OK	6.10123	10.7444	0.816412	2.00281	5e-05	0.00034525	yes
ENSG00000130695.12	ENSG00000130695.12	CEP85	chr1:26234152-26279038	Prone	Prot	OK	3.60076	4.92552	0.451976	1.19811	5e-05	0.00034525	yes
ENSG00000130702.12	ENSG00000130702.12	LAMA5	chr20:62302092-62367312	Prone	Prot	OK	19.8197	38.1213	0.943661	1.85907	5e-05	0.00034525	yes
ENSG00000130707.16	ENSG00000130707.16	ASS1	chr9:130444928-130501274	Prone	Prot	OK	3.02472	13.3726	2.1444	5.05045	5e-05	0.00034525	yes
ENSG00000130755.11	ENSG00000130755.11	GMFG	chr19:39328352-39342372	Prone	Prot	OK	27.9741	13.6914	-1.03083	-3.23146	5e-05	0.00034525	yes
ENSG00000130766.4	ENSG00000130766.4	SESN2	chr1:28259526-28282491	Prone	Prot	OK	3.77736	5.00683	0.40652	1.59664	5e-05	0.00034525	yes
ENSG00000130821.14	ENSG00000130821.14	SLC6A8	chrX:153669729-153696593	Prone	Prot	OK	27.611	11.2239	-1.29867	-3.38371	5e-05	0.00034525	yes
ENSG00000131016.15	ENSG00000131016.15	AKAP12	chr6:151239998-151358557	Prone	Prot	OK	108.744	50.6214	-1.10311	-6.62785	5e-05	0.00034525	yes
ENSG00000131019.9	ENSG00000131019.9	ULBP3	chr6:150063149-150069095	Prone	Prot	OK	1.6641	1.02174	-0.703715	-1.05234	5e-05	0.00034525	yes
ENSG00000131196.16	ENSG00000131196.16	NFATC1	chr18:79395855-79529325	Prone	Prot	OK	5.48456	9.52262	0.795981	2.21549	5e-05	0.00034525	yes
ENSG00000131238.15	ENSG00000131238.15	PPT1	chr1:40072704-40097703	Prone	Prot	OK	42.0185	49.7798	0.244534	1.33506	5e-05	0.00034525	yes
ENSG00000131386.16	ENSG00000131386.16	GALNT15	chr3:16174648-16231992	Prone	Prot	OK	32.4812	8.06705	-2.00949	-6.79645	5e-05	0.00034525	yes
ENSG00000131389.15	ENSG00000131389.15	SLC6A6	chr3:14402575-14542081	Prone	Prot	OK	18.5303	10.4681	-0.823895	-2.27385	5e-05	0.00034525	yes
ENSG00000131446.14	ENSG00000131446.14	MGAT1	chr5:180790540-180815652	Prone	Prot	OK	61.8816	80.344	0.37668	2.04854	5e-05	0.00034525	yes
ENSG00000131475.5	ENSG00000131475.5	VPS25	chr17:42773435-42779599	Prone	Prot	OK	23.3048	19.1017	-0.286928	-1.28566	5e-05	0.00034525	yes
ENSG00000131477.9	ENSG00000131477.9	RAMP2	chr17:42753913-42763041	Prone	Prot	OK	31.7342	105.524	1.73345	7.29373	5e-05	0.00034525	yes
ENSG00000131711.13	ENSG00000131711.13	MAP1B	chr5:72107233-72209570	Prone	Prot	OK	10.5521	16.552	0.649476	1.51882	5e-05	0.00034525	yes
ENSG00000131724.9	ENSG00000131724.9	IL13RA1	chrX:118727571-118794539	Prone	Prot	OK	28.4303	21.7223	-0.388249	-2.13592	5e-05	0.00034525	yes
ENSG00000131747.13	ENSG00000131747.13	TOP2A	chr17:40388515-40417950	Prone	Prot	OK	9.59145	13.6295	0.506911	2.17408	5e-05	0.00034525	yes
ENSG00000131773.12	ENSG00000131773.12	KHDRBS3	chr8:135457456-135656722	Prone	Prot	OK	6.79885	3.94396	-0.785646	-1.2855	5e-05	0.00034525	yes
ENSG00000131873.5	ENSG00000131873.5	CHSY1	chr15:101175722-101251932	Prone	Prot	OK	23.2343	19.9963	-0.216523	-1.12363	5e-05	0.00034525	yes
ENSG00000131979.17	ENSG00000131979.17	GCH1	chr14:54842007-54902852	Prone	Prot	OK	1.66135	5.35503	1.68854	3.26009	5e-05	0.00034525	yes
ENSG00000131981.14	ENSG00000131981.14	LGALS3	chr14:55124109-55145413	Prone	Prot	OK	60.5158	85.2225	0.493923	2.73644	5e-05	0.00034525	yes
ENSG00000132002.6	ENSG00000132002.6	DNAJB1	chr19:14514769-14565980	Prone	Prot	OK	15.6943	20.0911	0.356321	1.37201	5e-05	0.00034525	yes
ENSG00000132005.7	ENSG00000132005.7	RFX1	chr19:13961537-14007039	Prone	Prot	OK	1.47113	3.08177	1.06684	1.14777	5e-05	0.00034525	yes
ENSG00000132024.16	ENSG00000132024.16	CC2D1A	chr19:13882347-13930879	Prone	Prot	OK	4.60658	6.22647	0.43472	1.31865	5e-05	0.00034525	yes
ENSG00000132170.18	ENSG00000132170.18	PPARG	chr3:12287367-12434356	Prone	Prot	OK	6.14855	3.71492	-0.726917	-1.84066	5e-05	0.00034525	yes
ENSG00000132274.14	ENSG00000132274.14	TRIM22	chr11:5663556-5938619	Prone	Prot	OK	46.2926	59.2615	0.356315	1.36703	5e-05	0.00034525	yes
ENSG00000132357.12	ENSG00000132357.12	CARD6	chr5:40841183-40860175	Prone	Prot	OK	11.5484	14.6168	0.339932	1.9291	5e-05	0.00034525	yes
ENSG00000132359.12	ENSG00000132359.12	RAP1GAP2	chr17:2777055-3037739	Prone	Prot	OK	2.49702	1.36073	-0.875821	-1.72172	5e-05	0.00034525	yes
ENSG00000132376.18	ENSG00000132376.18	INPP5K	chr17:1494570-1516888	Prone	Prot	OK	16.111	25.7773	0.678057	2.16592	5e-05	0.00034525	yes
ENSG00000132432.12	ENSG00000132432.12	SEC61G	chr7:54752249-54804928	Prone	Prot	OK	143.133	114.31	-0.324408	-1.6702	5e-05	0.00034525	yes
ENSG00000132470.12	ENSG00000132470.12	ITGB4	chr17:75721327-75765711	Prone	Prot	OK	3.56252	37.3869	3.39156	7.3823	5e-05	0.00034525	yes
ENSG00000132471.10	ENSG00000132471.10	WBP2	chr17:75845698-75856507	Prone	Prot	OK	16.8387	22.2537	0.402265	1.79561	5e-05	0.00034525	yes
ENSG00000132481.5	ENSG00000132481.5	TRIM47	chr17:75874160-75879546	Prone	Prot	OK	25.4096	46.5603	0.873725	3.11144	5e-05	0.00034525	yes
ENSG00000132622.9	ENSG00000132622.9	HSPA12B	chr20:3732666-3753111	Prone	Prot	OK	1.27726	20.821	4.02692	11.6378	5e-05	0.00034525	yes
ENSG00000132646.9	ENSG00000132646.9	PCNA	chr20:5114952-5126626	Prone	Prot	OK	23.9763	31.4314	0.390597	2.02442	5e-05	0.00034525	yes
ENSG00000132670.19	ENSG00000132670.19	PTPRA	chr20:2835313-3039076	Prone	Prot	OK	13.5657	18.3007	0.431939	1.3629	5e-05	0.00034525	yes
ENSG00000132718.8	ENSG00000132718.8	SYT11	chr1:155859508-155885199	Prone	Prot	OK	8.90053	11.8641	0.414635	2.34861	5e-05	0.00034525	yes
ENSG00000132906.16	ENSG00000132906.16	CASP9	chr1:15456727-15526534	Prone	Prot	OK	4.58718	3.2782	-0.484701	-1.19993	5e-05	0.00034525	yes
ENSG00000132963.7	ENSG00000132963.7	POMP	chr13:28659103-28678925	Prone	Prot	OK	72.9728	56.8805	-0.359425	-2.11483	5e-05	0.00034525	yes
ENSG00000132970.11	ENSG00000132970.11	WASF3	chr13:26557702-26688948	Prone	Prot	OK	5.58876	3.87405	-0.528685	-2.35002	5e-05	0.00034525	yes
ENSG00000133019.10	ENSG00000133019.10	CHRM3	chr1:239386564-239916955	Prone	Prot	OK	0.725553	2.5633	1.82085	1.82107	5e-05	0.00034525	yes
ENSG00000133026.11	ENSG00000133026.11	MYH10	chr17:8413130-8630761	Prone	Prot	OK	39.8373	30.4052	-0.389802	-1.02367	5e-05	0.00034525	yes
ENSG00000133056.12	ENSG00000133056.12	PIK3C2B	chr1:204377849-204494724	Prone	Prot	OK	15.9939	34.2611	1.09905	2.34438	5e-05	0.00034525	yes
ENSG00000133101.8	ENSG00000133101.8	CCNA1	chr13:36431519-36442882	Prone	Prot	OK	1.89401	1.30322	-0.539362	-1.19274	5e-05	0.00034525	yes
ENSG00000133110.13	ENSG00000133110.13	POSTN	chr13:37562582-37598844	Prone	Prot	OK	98.7812	83.8373	-0.236643	-1.26899	5e-05	0.00034525	yes
ENSG00000133119.11	ENSG00000133119.11	RFC3	chr13:33818048-33966558	Prone	Prot	OK	1.83915	2.67338	0.539622	1.30516	5e-05	0.00034525	yes
ENSG00000133256.11	ENSG00000133256.11	PDE6B	chr4:625583-670782	Prone	Prot	OK	1.97075	0.974976	-1.01531	-0.788902	5e-05	0.00034525	yes
ENSG00000133321.9	ENSG00000133321.9	RARRES3	chr11:63536808-63546462	Prone	Prot	OK	2.18283	3.57718	0.712622	1.23119	5e-05	0.00034525	yes
ENSG00000133401.14	ENSG00000133401.14	PDZD2	chr5:31639409-32121941	Prone	Prot	OK	2.90466	1.47654	-0.97615	-1.24376	5e-05	0.00034525	yes
ENSG00000133466.12	ENSG00000133466.12	C1QTNF6	chr22:37125837-37199385	Prone	Prot	OK	8.58429	11.7561	0.45364	1.87069	5e-05	0.00034525	yes
ENSG00000133561.14	ENSG00000133561.14	GIMAP6	chr7:150625374-150632648	Prone	Prot	OK	76.8903	90.2704	0.231452	1.24478	5e-05	0.00034525	yes
ENSG00000133574.8	ENSG00000133574.8	GIMAP4	chr7:150567276-150573955	Prone	Prot	OK	57.6279	50.4601	-0.191623	-1.12569	5e-05	0.00034525	yes
ENSG00000133687.14	ENSG00000133687.14	TMTC1	chr12:29500839-29784759	Prone	Prot	OK	2.92105	13.2054	2.17657	7.15585	5e-05	0.00034525	yes
ENSG00000133703.10	ENSG00000133703.10	KRAS	chr12:25195215-25250936	Prone	Prot	OK	9.68791	13.015	0.425916	1.99597	5e-05	0.00034525	yes
ENSG00000133731.8	ENSG00000133731.8	IMPA1	chr8:81657960-81686693	Prone	Prot	OK	13.6925	10.7225	-0.352748	-1.16498	5e-05	0.00034525	yes
ENSG00000133800.7	ENSG00000133800.7	LYVE1	chr11:10541271-10693988	Prone	Prot	OK	14.2343	23.8552	0.744939	2.73892	5e-05	0.00034525	yes
ENSG00000133816.12	ENSG00000133816.12	MICAL2	chr11:12094007-12263789	Prone	Prot	OK	27.8029	17.3798	-0.677827	-2.31636	5e-05	0.00034525	yes
ENSG00000133872.12	ENSG00000133872.12	SARAF	chr8:30063011-30083467	Prone	Prot	OK	178.126	111.46	-0.676368	-3.87549	5e-05	0.00034525	yes
ENSG00000134057.13	ENSG00000134057.13	CCNB1	chr5:69167009-69178245	Prone	Prot	OK	15.1363	19.1941	0.342651	1.39998	5e-05	0.00034525	yes
ENSG00000134072.9	ENSG00000134072.9	CAMK1	chr3:9749943-9855138	Prone	Prot	OK	8.92163	16.1776	0.858616	1.43141	5e-05	0.00034525	yes
ENSG00000134107.4	ENSG00000134107.4	BHLHE40	chr3:4896808-4985323	Prone	Prot	OK	19.0247	14.0831	-0.43391	-1.94483	5e-05	0.00034525	yes
ENSG00000134138.18	ENSG00000134138.18	MEIS2	chr15:36889203-37101299	Prone	Prot	OK	25.6332	61.8818	1.2715	5.3178	5e-05	0.00034525	yes
ENSG00000134243.10	ENSG00000134243.10	SORT1	chr1:109309567-109397951	Prone	Prot	OK	15.2142	18.9746	0.31865	1.66957	5e-05	0.00034525	yes
ENSG00000134291.10	ENSG00000134291.10	TMEM106C	chr12:47963568-47968878	Prone	Prot	OK	24.752	31.9454	0.368064	1.39737	5e-05	0.00034525	yes
ENSG00000134323.10	ENSG00000134323.10	MYCN	chr2:15920398-15947007	Prone	Prot	OK	1.81579	2.55226	0.491181	1.28025	5e-05	0.00034525	yes
ENSG00000134333.12	ENSG00000134333.12	LDHA	chr11:18394387-18408425	Prone	Prot	OK	162.443	121.315	-0.421179	-2.40711	5e-05	0.00034525	yes
ENSG00000134352.18	ENSG00000134352.18	IL6ST	chr5:55935094-55994993	Prone	Prot	OK	136.668	193.976	0.505207	1.27104	5e-05	0.00034525	yes
ENSG00000134508.11	ENSG00000134508.11	CABLES1	chr18:23134563-23437961	Prone	Prot	OK	22.1275	16.0958	-0.459159	-1.36505	5e-05	0.00034525	yes
ENSG00000134531.8	ENSG00000134531.8	EMP1	chr12:13196715-13219939	Prone	Prot	OK	112.587	146.227	0.377166	1.23216	5e-05	0.00034525	yes
ENSG00000134668.11	ENSG00000134668.11	SPOCD1	chr1:31789129-31816051	Prone	Prot	OK	6.6184	2.96432	-1.15878	-2.85816	5e-05	0.00034525	yes
ENSG00000134686.15	ENSG00000134686.15	PHC2	chr1:33306765-33431052	Prone	Prot	OK	37.3697	31.2064	-0.260027	-1.20807	5e-05	0.00034525	yes
ENSG00000134690.9	ENSG00000134690.9	CDCA8	chr1:37692417-37709719	Prone	Prot	OK	1.556	2.18318	0.488586	1.33546	5e-05	0.00034525	yes
ENSG00000134759.12	ENSG00000134759.12	ELP2	chr18:36129443-36187448	Prone	Prot	OK	36.4157	28.4796	-0.354631	-1.25616	5e-05	0.00034525	yes
ENSG00000134802.16	ENSG00000134802.16	SLC43A3	chr11:57386793-57427580	Prone	Prot	OK	51.1758	38.03	-0.428324	-1.7817	5e-05	0.00034525	yes
ENSG00000134824.12	ENSG00000134824.12	FADS2	chr11:61680432-61867354	Prone	Prot	OK	53.6758	82.083	0.612812	2.1269	5e-05	0.00034525	yes
ENSG00000134900.10	ENSG00000134900.10	TPP2	chr13:102597002-102679958	Prone	Prot	OK	17.0293	24.3299	0.514709	1.58119	5e-05	0.00034525	yes
ENSG00000134901.11	ENSG00000134901.11	KDELC1	chr13:102784280-102799007	Prone	Prot	OK	9.97083	11.7111	0.232092	1.00598	5e-05	0.00034525	yes
ENSG00000134954.13	ENSG00000134954.13	ETS1	chr11:128458760-128587558	Prone	Prot	OK	35.3887	46.3703	0.389911	1.95623	5e-05	0.00034525	yes
ENSG00000134970.13	ENSG00000134970.13	TMED7	chr5:115578641-115632992	Prone	Prot	OK	53.6956	44.0004	-0.287287	-1.73166	5e-05	0.00034525	yes
ENSG00000134986.12	ENSG00000134986.12	NREP	chr5:111496032-112017309	Prone	Prot	OK	68.0347	48.2152	-0.496784	-1.65468	5e-05	0.00034525	yes
ENSG00000135046.12	ENSG00000135046.12	ANXA1	chr9:73151756-73170393	Prone	Prot	OK	101.848	118.137	0.214038	1.34476	5e-05	0.00034525	yes
ENSG00000135052.15	ENSG00000135052.15	GOLM1	chr9:86026145-86100173	Prone	Prot	OK	18.9414	23.8806	0.334296	1.54796	5e-05	0.00034525	yes
ENSG00000135063.16	ENSG00000135063.16	FAM189A2	chr9:69324571-69392455	Prone	Prot	OK	13.2662	4.9561	-1.42047	-5.21074	5e-05	0.00034525	yes
ENSG00000135069.12	ENSG00000135069.12	PSAT1	chr9:78297142-78330093	Prone	Prot	OK	1.99131	2.90812	0.546368	1.50713	5e-05	0.00034525	yes
ENSG00000135074.14	ENSG00000135074.14	ADAM19	chr5:157260121-157575775	Prone	Prot	OK	11.5955	33.1285	1.51451	7.15916	5e-05	0.00034525	yes
ENSG00000135124.13	ENSG00000135124.13	P2RX4	chr12:121209856-121234106	Prone	Prot	OK	19.6045	15.3399	-0.353891	-1.53959	5e-05	0.00034525	yes
ENSG00000135218.16	ENSG00000135218.16	CD36	chr7:80312573-80679277	Prone	Prot	OK	1.73301	0.511447	-1.76063	-0.862342	5e-05	0.00034525	yes
ENSG00000135312.5	ENSG00000135312.5	HTR1B	chr6:77462204-77463464	Prone	Prot	OK	13.1414	7.31803	-0.844586	-2.84029	5e-05	0.00034525	yes
ENSG00000135318.10	ENSG00000135318.10	NT5E	chr6:85449583-85495791	Prone	Prot	OK	68.559	81.861	0.255831	1.47086	5e-05	0.00034525	yes
ENSG00000135324.5	ENSG00000135324.5	MRAP2	chr6:84033755-84090881	Prone	Prot	OK	9.1139	3.71676	-1.29402	-5.03451	5e-05	0.00034525	yes
ENSG00000135363.10	ENSG00000135363.10	LMO2	chr11:33858575-33892289	Prone	Prot	OK	62.6099	100.484	0.682507	4.06175	5e-05	0.00034525	yes
ENSG00000135451.11	ENSG00000135451.11	TROAP	chr12:49292630-49331731	Prone	Prot	OK	4.6194	7.00099	0.599853	1.12778	5e-05	0.00034525	yes
ENSG00000135480.13	ENSG00000135480.13	KRT7	chr12:52232519-52309163	Prone	Prot	OK	15.6955	5.6768	-1.4672	-2.93068	5e-05	0.00034525	yes
ENSG00000135547.7	ENSG00000135547.7	HEY2	chr6:125578557-125761269	Prone	Prot	OK	2.94952	4.88315	0.727331	2.49535	5e-05	0.00034525	yes
ENSG00000135604.9	ENSG00000135604.9	STX11	chr6:144150525-144188370	Prone	Prot	OK	2.56883	1.44013	-0.834912	-1.90968	5e-05	0.00034525	yes
ENSG00000135631.14	ENSG00000135631.14	RAB11FIP5	chr2:72942035-73156721	Prone	Prot	OK	21.4743	27.9389	0.379665	1.54541	5e-05	0.00034525	yes
ENSG00000135643.4	ENSG00000135643.4	KCNMB4	chr12:70366275-70434292	Prone	Prot	OK	2.25131	1.30362	-0.788242	-1.62486	5e-05	0.00034525	yes
ENSG00000135698.8	ENSG00000135698.8	MPHOSPH6	chr16:82147797-82170226	Prone	Prot	OK	12.7086	8.76521	-0.535951	-1.75601	5e-05	0.00034525	yes
ENSG00000135709.11	ENSG00000135709.11	KIAA0513	chr16:85027750-85094230	Prone	Prot	OK	1.47595	2.28405	0.629949	1.08147	5e-05	0.00034525	yes
ENSG00000135766.8	ENSG00000135766.8	EGLN1	chr1:231363750-231425044	Prone	Prot	OK	38.3816	14.5833	-1.3961	-4.71772	5e-05	0.00034525	yes
ENSG00000135823.12	ENSG00000135823.12	STX6	chr1:180913153-181023121	Prone	Prot	OK	23.3204	15.0378	-0.633004	-2.92181	5e-05	0.00034525	yes
ENSG00000135899.15	ENSG00000135899.15	SP110	chr2:230121369-230313215	Prone	Prot	OK	2.58385	4.05745	0.651054	1.18368	5e-05	0.00034525	yes
ENSG00000135919.11	ENSG00000135919.11	SERPINE2	chr2:223975111-224039319	Prone	Prot	OK	22.0494	36.4418	0.724855	3.93408	5e-05	0.00034525	yes
ENSG00000135926.11	ENSG00000135926.11	TMBIM1	chr2:218270391-218368099	Prone	Prot	OK	81.7686	115.232	0.494923	2.52511	5e-05	0.00034525	yes
ENSG00000135956.7	ENSG00000135956.7	TMEM127	chr2:96248515-96265994	Prone	Prot	OK	16.2625	23.5178	0.532199	2.15357	5e-05	0.00034525	yes
ENSG00000135966.11	ENSG00000135966.11	TGFBRAP1	chr2:105264390-105330529	Prone	Prot	OK	19.3756	15.6127	-0.311524	-1.70202	5e-05	0.00034525	yes
ENSG00000136026.12	ENSG00000136026.12	CKAP4	chr12:106237876-106347015	Prone	Prot	OK	53.5293	44.9824	-0.250967	-1.38095	5e-05	0.00034525	yes
ENSG00000136068.13	ENSG00000136068.13	FLNB	chr3:58008399-58172251	Prone	Prot	OK	174.483	146.858	-0.248668	-0.909645	5e-05	0.00034525	yes
ENSG00000136108.13	ENSG00000136108.13	CKAP2	chr13:52455428-52476628	Prone	Prot	OK	8.68312	10.2142	0.234286	1.1833	5e-05	0.00034525	yes
ENSG00000136114.14	ENSG00000136114.14	THSD1	chr13:52377166-52406494	Prone	Prot	OK	7.95972	13.0268	0.710689	3.66165	5e-05	0.00034525	yes
ENSG00000136141.13	ENSG00000136141.13	LRCH1	chr13:46553167-46753040	Prone	Prot	OK	5.31749	3.82297	-0.476052	-1.69062	5e-05	0.00034525	yes
ENSG00000136144.10	ENSG00000136144.10	RCBTB1	chr13:49531945-49585583	Prone	Prot	OK	14.7626	18.6971	0.340865	1.73959	5e-05	0.00034525	yes
ENSG00000136153.18	ENSG00000136153.18	LMO7	chr13:75549479-75859870	Prone	Prot	OK	7.60847	21.349	1.48849	3.38684	5e-05	0.00034525	yes
ENSG00000136158.9	ENSG00000136158.9	SPRY2	chr13:80335975-80340951	Prone	Prot	OK	6.13272	4.58692	-0.419002	-1.59092	5e-05	0.00034525	yes
ENSG00000136205.15	ENSG00000136205.15	TNS3	chr7:47275153-47582558	Prone	Prot	OK	13.3079	9.61838	-0.468418	-1.16556	5e-05	0.00034525	yes
ENSG00000136235.14	ENSG00000136235.14	GPNMB	chr7:23235966-23275108	Prone	Prot	OK	1.13085	1.87352	0.728344	0.668861	5e-05	0.00034525	yes
ENSG00000136237.17	ENSG00000136237.17	RAPGEF5	chr7:22118237-22357144	Prone	Prot	OK	56.1979	101.95	0.859273	2.94344	5e-05	0.00034525	yes
ENSG00000136240.8	ENSG00000136240.8	KDELR2	chr7:6409125-6484242	Prone	Prot	OK	77.4171	63.4966	-0.285973	-1.55419	5e-05	0.00034525	yes
ENSG00000136247.13	ENSG00000136247.13	ZDHHC4	chr7:6577433-6589374	Prone	Prot	OK	20.6554	16.3328	-0.33875	-1.27098	5e-05	0.00034525	yes
ENSG00000136261.13	ENSG00000136261.13	BZW2	chr7:16646130-16719898	Prone	Prot	OK	46.7982	34.0143	-0.460313	-2.64729	5e-05	0.00034525	yes
ENSG00000136383.6	ENSG00000136383.6	ALPK3	chr15:84816679-84873482	Prone	Prot	OK	12.4353	7.08724	-0.811141	-2.22299	5e-05	0.00034525	yes
ENSG00000136630.12	ENSG00000136630.12	HLX	chr1:220832762-220885059	Prone	Prot	OK	9.93475	6.56032	-0.598717	-1.71116	5e-05	0.00034525	yes
ENSG00000136717.13	ENSG00000136717.13	BIN1	chr2:127048026-127107355	Prone	Prot	OK	14.7837	20.173	0.448414	1.91856	5e-05	0.00034525	yes
ENSG00000136720.6	ENSG00000136720.6	HS6ST1	chr2:128236715-128318577	Prone	Prot	OK	7.59855	11.8852	0.645369	2.78251	5e-05	0.00034525	yes
ENSG00000136824.17	ENSG00000136824.17	SMC2	chr9:104094259-104141417	Prone	Prot	OK	4.47284	5.61671	0.328534	1.39765	5e-05	0.00034525	yes
ENSG00000136826.13	ENSG00000136826.13	KLF4	chr9:107484851-107490482	Prone	Prot	OK	0.866985	15.1812	4.13014	5.94206	5e-05	0.00034525	yes
ENSG00000136869.13	ENSG00000136869.13	TLR4	chr9:117704331-117716871	Prone	Prot	OK	25.7438	34.8099	0.435273	2.09962	5e-05	0.00034525	yes
ENSG00000136877.13	ENSG00000136877.13	FPGS	chr9:127794596-127814327	Prone	Prot	OK	26.8756	33.5147	0.318497	1.19311	5e-05	0.00034525	yes
ENSG00000136999.4	ENSG00000136999.4	NOV	chr8:119416305-119462350	Prone	Prot	OK	0.736988	8.53409	3.53353	5.48839	5e-05	0.00034525	yes
ENSG00000137033.10	ENSG00000137033.10	IL33	chr9:6215785-6257983	Prone	Prot	OK	42.0673	31.5582	-0.414685	-2.40637	5e-05	0.00034525	yes
ENSG00000137154.11	ENSG00000137154.11	RPS6	chr9:19375450-19380254	Prone	Prot	OK	965.069	796.573	-0.276825	-1.53485	5e-05	0.00034525	yes
ENSG00000137198.8	ENSG00000137198.8	GMPR	chr6:16238579-16295549	Prone	Prot	OK	13.5243	17.182	0.34535	1.52356	5e-05	0.00034525	yes
ENSG00000137225.11	ENSG00000137225.11	CAPN11	chr6:44158810-44184402	Prone	Prot	OK	1.79631	4.84572	1.43168	2.75922	5e-05	0.00034525	yes
ENSG00000137309.18	ENSG00000137309.18	HMGA1	chr6:34236872-34246231	Prone	Prot	OK	221.769	173.299	-0.355794	-2.26906	5e-05	0.00034525	yes
ENSG00000137310.10	ENSG00000137310.10	TCF19	chr6:31158541-31180731	Prone	Prot	OK	2.2847	3.94435	0.787784	1.91427	5e-05	0.00034525	yes
ENSG00000137331.11	ENSG00000137331.11	IER3	chr6:30742928-30744554	Prone	Prot	OK	327.617	203.756	-0.685169	-4.35735	5e-05	0.00034525	yes
ENSG00000137393.9	ENSG00000137393.9	RNF144B	chr6:18387349-18468874	Prone	Prot	OK	28.0449	22.5972	-0.311592	-1.44571	5e-05	0.00034525	yes
ENSG00000137404.13	ENSG00000137404.13	NRM	chr6:30688046-30691420	Prone	Prot	OK	4.94175	8.20757	0.731934	2.01187	5e-05	0.00034525	yes
ENSG00000137501.15	ENSG00000137501.15	SYTL2	chr11:85694223-85811159	Prone	Prot	OK	1.48116	0.557478	-1.40974	-0.75518	5e-05	0.00034525	yes
ENSG00000137507.10	ENSG00000137507.10	LRRC32	chr11:76657055-76670747	Prone	Prot	OK	45.0696	29.5383	-0.609568	-3.14719	5e-05	0.00034525	yes
ENSG00000137573.12	ENSG00000137573.12	SULF1	chr8:69466623-69660915	Prone	Prot	OK	2.88657	14.4235	2.32099	3.40591	5e-05	0.00034525	yes
ENSG00000137575.10	ENSG00000137575.10	SDCBP	chr8:58552923-58582860	Prone	Prot	OK	157.36	228.844	0.540292	3.24607	5e-05	0.00034525	yes
ENSG00000137710.13	ENSG00000137710.13	RDX	chr11:110174879-110296722	Prone	Prot	OK	91.7189	115.138	0.328075	1.75622	5e-05	0.00034525	yes
ENSG00000137727.11	ENSG00000137727.11	ARHGAP20	chr11:110577041-110713189	Prone	Prot	OK	1.74666	3.56859	1.03075	4.26024	5e-05	0.00034525	yes
ENSG00000137731.12	ENSG00000137731.12	FXYD2	chr11:117427772-117877486	Prone	Prot	OK	3.46388	6.37893	0.880924	1.2707	5e-05	0.00034525	yes
ENSG00000137801.10	ENSG00000137801.10	THBS1	chr15:39581078-39599466	Prone	Prot	OK	2447.09	962.826	-1.34572	-1.31676	5e-05	0.00034525	yes
ENSG00000137818.10	ENSG00000137818.10	RPLP1	chr15:69452783-69456194	Prone	Prot	OK	311.928	385.772	0.306539	1.39167	5e-05	0.00034525	yes
ENSG00000137834.13	ENSG00000137834.13	SMAD6	chr15:66702227-66782848	Prone	Prot	OK	30.393	12.4232	-1.2907	-4.3095	5e-05	0.00034525	yes
ENSG00000137876.8	ENSG00000137876.8	RSL24D1	chr15:55180805-55197067	Prone	Prot	OK	40.4146	34.7514	-0.217804	-1.20271	5e-05	0.00034525	yes
ENSG00000137936.15	ENSG00000137936.15	BCAR3	chr1:93561785-93847150	Prone	Prot	OK	10.1897	13.996	0.457909	1.86337	5e-05	0.00034525	yes
ENSG00000137962.11	ENSG00000137962.11	ARHGAP29	chr1:94148987-94275068	Prone	Prot	OK	63.7774	51.5129	-0.308113	-1.78231	5e-05	0.00034525	yes
ENSG00000137965.9	ENSG00000137965.9	IFI44	chr1:78649795-78664078	Prone	Prot	OK	10.6759	14.7078	0.462225	1.51225	5e-05	0.00034525	yes
ENSG00000137968.15	ENSG00000137968.15	SLC44A5	chr1:75202130-75611116	Prone	Prot	OK	3.49562	1.993	-0.81061	-2.79575	5e-05	0.00034525	yes
ENSG00000138030.11	ENSG00000138030.11	KHK	chr2:27086746-27119115	Prone	Prot	OK	0.837368	1.68947	1.01264	1.03888	5e-05	0.00034525	yes
ENSG00000138061.10	ENSG00000138061.10	CYP1B1	chr2:37923186-38239590	Prone	Prot	OK	0.0438669	1.05172	4.58348	0.331709	5e-05	0.00034525	yes
ENSG00000138135.6	ENSG00000138135.6	CH25H	chr10:89205628-89207314	Prone	Prot	OK	1.16119	0.545955	-1.08875	-1.55207	5e-05	0.00034525	yes
ENSG00000138160.5	ENSG00000138160.5	KIF11	chr10:92593285-92655395	Prone	Prot	OK	3.34198	4.07006	0.284346	1.30982	5e-05	0.00034525	yes
ENSG00000138162.16	ENSG00000138162.16	TACC2	chr10:121989173-122254545	Prone	Prot	OK	6.74484	14.4683	1.10103	2.58627	5e-05	0.00034525	yes
ENSG00000138166.5	ENSG00000138166.5	DUSP5	chr10:110497837-110511544	Prone	Prot	OK	8.12605	21.5917	1.40985	6.75906	5e-05	0.00034525	yes
ENSG00000138172.9	ENSG00000138172.9	CALHM2	chr10:103446785-103452402	Prone	Prot	OK	15.4425	31.1045	1.01021	4.585	5e-05	0.00034525	yes
ENSG00000138180.14	ENSG00000138180.14	CEP55	chr10:93496631-93529092	Prone	Prot	OK	6.21494	8.03371	0.370327	1.6619	5e-05	0.00034525	yes
ENSG00000138185.15	ENSG00000138185.15	ENTPD1	chr10:95711778-96090238	Prone	Prot	OK	34.9189	84.458	1.27423	4.64141	5e-05	0.00034525	yes
ENSG00000138279.14	ENSG00000138279.14	ANXA7	chr10:73375100-73414076	Prone	Prot	OK	36.6178	43.8468	0.259928	1.19938	5e-05	0.00034525	yes
ENSG00000138411.9	ENSG00000138411.9	HECW2	chr2:196194369-196593692	Prone	Prot	OK	17.3833	31.8445	0.873346	2.7967	5e-05	0.00034525	yes
ENSG00000138413.12	ENSG00000138413.12	IDH1	chr2:208236226-208266074	Prone	Prot	OK	38.3097	54.032	0.496102	2.86762	5e-05	0.00034525	yes
ENSG00000138434.15	ENSG00000138434.15	SSFA2	chr2:181891832-181930738	Prone	Prot	OK	71.3623	106.268	0.574468	2.36054	5e-05	0.00034525	yes
ENSG00000138439.11	ENSG00000138439.11	FAM117B	chr2:202635187-202769757	Prone	Prot	OK	1.51317	0.969957	-0.641584	-1.19516	5e-05	0.00034525	yes
ENSG00000138448.10	ENSG00000138448.10	ITGAV	chr2:186590064-186765965	Prone	Prot	OK	94.8809	79.0477	-0.263394	-1.22352	5e-05	0.00034525	yes
ENSG00000138449.9	ENSG00000138449.9	SLC40A1	chr2:189560578-189583758	Prone	Prot	OK	14.7919	17.7662	0.264323	1.09715	5e-05	0.00034525	yes
ENSG00000138463.8	ENSG00000138463.8	DIRC2	chr3:122794794-122881139	Prone	Prot	OK	7.78648	10.1941	0.388696	1.46569	5e-05	0.00034525	yes
ENSG00000138496.15	ENSG00000138496.15	PARP9	chr3:122527923-122575203	Prone	Prot	OK	6.19048	12.4719	1.01056	3.44609	5e-05	0.00034525	yes
ENSG00000138604.8	ENSG00000138604.8	GLCE	chr15:69160583-69272217	Prone	Prot	OK	55.1606	35.1119	-0.651679	-3.90086	5e-05	0.00034525	yes
ENSG00000138606.18	ENSG00000138606.18	SHF	chr15:45092649-45201175	Prone	Prot	OK	2.43482	1.18272	-1.0417	-1.09546	5e-05	0.00034525	yes
ENSG00000138617.13	ENSG00000138617.13	PARP16	chr15:65234459-65300618	Prone	Prot	OK	2.56748	1.40679	-0.867941	-1.39196	5e-05	0.00034525	yes
ENSG00000138639.16	ENSG00000138639.16	ARHGAP24	chr4:85475113-86002670	Prone	Prot	OK	21.0644	16.5992	-0.3437	-1.3728	5e-05	0.00034525	yes
ENSG00000138642.13	ENSG00000138642.13	HERC6	chr4:88378738-88443111	Prone	Prot	OK	1.84392	3.01253	0.708201	1.21573	5e-05	0.00034525	yes
ENSG00000138674.15	ENSG00000138674.15	SEC31A	chr4:82818660-83012926	Prone	Prot	OK	87.3565	68.2835	-0.355378	-1.26858	5e-05	0.00034525	yes
ENSG00000138678.9	ENSG00000138678.9	AGPAT9	chr4:83535913-83605875	Prone	Prot	OK	2.29813	5.09048	1.14734	1.60078	5e-05	0.00034525	yes
ENSG00000138685.11	ENSG00000138685.11	FGF2	chr4:122826707-122922968	Prone	Prot	OK	3.90635	9.72516	1.3159	5.76937	5e-05	0.00034525	yes
ENSG00000138709.16	ENSG00000138709.16	LARP1B	chr4:128061267-128222931	Prone	Prot	OK	6.47736	5.27244	-0.296934	-1.16459	5e-05	0.00034525	yes
ENSG00000138722.8	ENSG00000138722.8	MMRN1	chr4:89879531-89954629	Prone	Prot	OK	396.457	262.629	-0.594138	-2.54505	5e-05	0.00034525	yes
ENSG00000138768.13	ENSG00000138768.13	USO1	chr4:75724592-75814286	Prone	Prot	OK	36.1147	30.6664	-0.235927	-1.20973	5e-05	0.00034525	yes
ENSG00000138801.7	ENSG00000138801.7	PAPSS1	chr4:107590275-107720452	Prone	Prot	OK	52.9518	67.1914	0.343597	1.89545	5e-05	0.00034525	yes
ENSG00000138835.21	ENSG00000138835.21	RGS3	chr9:113444730-113597743	Prone	Prot	OK	166.08	139.683	-0.249723	-1.24579	5e-05	0.00034525	yes
ENSG00000139117.12	ENSG00000139117.12	CPNE8	chr12:38646821-38909592	Prone	Prot	OK	8.61036	15.465	0.844862	2.21668	5e-05	0.00034525	yes
ENSG00000139132.13	ENSG00000139132.13	FGD4	chr12:32399528-32646050	Prone	Prot	OK	8.45116	6.71304	-0.332182	-1.13781	5e-05	0.00034525	yes
ENSG00000139146.12	ENSG00000139146.12	FAM60A	chr12:31280421-31327058	Prone	Prot	OK	24.6369	15.9805	-0.624503	-2.89615	5e-05	0.00034525	yes
ENSG00000139174.9	ENSG00000139174.9	PRICKLE1	chr12:42238446-42590355	Prone	Prot	OK	5.42267	14.8261	1.45106	1.57155	5e-05	0.00034525	yes
ENSG00000139211.6	ENSG00000139211.6	AMIGO2	chr12:47075706-47236662	Prone	Prot	OK	6.30091	9.82451	0.640826	2.92231	5e-05	0.00034525	yes
ENSG00000139289.12	ENSG00000139289.12	PHLDA1	chr12:76025446-76033932	Prone	Prot	OK	10.7311	13.0434	0.281518	1.58994	5e-05	0.00034525	yes
ENSG00000139318.7	ENSG00000139318.7	DUSP6	chr12:89347231-89353271	Prone	Prot	OK	158.646	66.5909	-1.25241	-5.47858	5e-05	0.00034525	yes
ENSG00000139405.14	ENSG00000139405.14	RITA1	chr12:113185525-113192368	Prone	Prot	OK	8.6581	11.416	0.398935	1.40341	5e-05	0.00034525	yes
ENSG00000139508.13	ENSG00000139508.13	SLC46A3	chr13:28700063-28718970	Prone	Prot	OK	16.386	12.4505	-0.396263	-1.91145	5e-05	0.00034525	yes
ENSG00000139549.2	ENSG00000139549.2	DHH	chr12:49089420-49094819	Prone	Prot	OK	0.626382	3.99013	2.67132	4.07416	5e-05	0.00034525	yes
ENSG00000139718.9	ENSG00000139718.9	SETD1B	chr12:121804179-121832584	Prone	Prot	OK	0.741892	1.10563	0.575586	1.66997	5e-05	0.00034525	yes
ENSG00000139880.18	ENSG00000139880.18	CDH24	chr14:23047061-23057538	Prone	Prot	OK	6.12222	8.07701	0.399766	1.65471	5e-05	0.00034525	yes
ENSG00000140092.13	ENSG00000140092.13	FBLN5	chr14:91869411-91947987	Prone	Prot	OK	6.46029	4.39449	-0.555902	-1.30295	5e-05	0.00034525	yes
ENSG00000140105.16	ENSG00000140105.16	WARS	chr14:100333787-100530303	Prone	Prot	OK	34.5595	55.7406	0.689645	2.42719	5e-05	0.00034525	yes
ENSG00000140263.12	ENSG00000140263.12	SORD	chr15:45023103-45077185	Prone	Prot	OK	3.96646	1.77006	-1.16405	-2.05891	5e-05	0.00034525	yes
ENSG00000140319.9	ENSG00000140319.9	SRP14	chr15:40035738-40039188	Prone	Prot	OK	84.3741	125.987	0.578407	3.44438	5e-05	0.00034525	yes
ENSG00000140374.14	ENSG00000140374.14	ETFA	chr15:76059836-76311472	Prone	Prot	OK	56.2169	48.5123	-0.212654	-1.11049	5e-05	0.00034525	yes
ENSG00000140406.3	ENSG00000140406.3	MESDC1	chr15:81000943-81005788	Prone	Prot	OK	4.23422	8.7379	1.04519	4.70081	5e-05	0.00034525	yes
ENSG00000140416.18	ENSG00000140416.18	TPM1	chr15:63042631-63071915	Prone	Prot	OK	140.888	56.508	-1.31802	-6.60678	5e-05	0.00034525	yes
ENSG00000140464.18	ENSG00000140464.18	PML	chr15:73994672-74047812	Prone	Prot	OK	11.5149	15.7642	0.453149	1.53594	5e-05	0.00034525	yes
ENSG00000140465.12	ENSG00000140465.12	CYP1A1	chr15:74719541-74725610	Prone	Prot	OK	33.0381	48.7009	0.559817	3.27046	5e-05	0.00034525	yes
ENSG00000140497.15	ENSG00000140497.15	SCAMP2	chr15:74843729-74873365	Prone	Prot	OK	24.801	32.2103	0.377125	1.52934	5e-05	0.00034525	yes
ENSG00000140511.10	ENSG00000140511.10	HAPLN3	chr15:88877287-88895626	Prone	Prot	OK	39.094	45.4132	0.216165	1.14382	5e-05	0.00034525	yes
ENSG00000140545.13	ENSG00000140545.13	MFGE8	chr15:88898682-88913411	Prone	Prot	OK	23.6063	18.5905	-0.344603	-1.45227	5e-05	0.00034525	yes
ENSG00000140564.9	ENSG00000140564.9	FURIN	chr15:90868591-90883458	Prone	Prot	OK	29.7413	36.7389	0.304842	1.64007	5e-05	0.00034525	yes
ENSG00000140575.11	ENSG00000140575.11	IQGAP1	chr15:90388217-90502243	Prone	Prot	OK	39.9171	48.5043	0.281106	1.01968	5e-05	0.00034525	yes
ENSG00000140650.10	ENSG00000140650.10	PMM2	chr16:8674564-8869012	Prone	Prot	OK	14.9005	10.955	-0.443774	-1.16573	5e-05	0.00034525	yes
ENSG00000140682.17	ENSG00000140682.17	TGFB1I1	chr16:31470203-31477960	Prone	Prot	OK	30.7037	19.5124	-0.654021	-2.80016	5e-05	0.00034525	yes
ENSG00000140688.15	ENSG00000140688.15	C16orf58	chr16:31483001-31509309	Prone	Prot	OK	17.2972	12.7634	-0.438523	-1.44398	5e-05	0.00034525	yes
ENSG00000140743.6	ENSG00000140743.6	CDR2	chr16:22345935-22536521	Prone	Prot	OK	13.6082	10.0899	-0.431563	-1.20549	5e-05	0.00034525	yes
ENSG00000140853.14	ENSG00000140853.14	NLRC5	chr16:56989484-57083531	Prone	Prot	OK	6.86142	11.5682	0.75358	1.49762	5e-05	0.00034525	yes
ENSG00000140937.12	ENSG00000140937.12	CDH11	chr16:64943752-65126112	Prone	Prot	OK	8.82674	12.9317	0.550957	1.24137	5e-05	0.00034525	yes
ENSG00000140941.11	ENSG00000140941.11	MAP1LC3B	chr16:87083561-87404779	Prone	Prot	OK	25.5908	33.2292	0.376828	1.644	5e-05	0.00034525	yes
ENSG00000141232.4	ENSG00000141232.4	TOB1	chr17:50862222-50910232	Prone	Prot	OK	4.00417	6.54236	0.708309	2.46614	5e-05	0.00034525	yes
ENSG00000141349.7	ENSG00000141349.7	G6PC3	chr17:44070734-44076344	Prone	Prot	OK	11.9516	18.2289	0.60902	2.05581	5e-05	0.00034525	yes
ENSG00000141424.11	ENSG00000141424.11	SLC39A6	chr18:36108531-36129385	Prone	Prot	OK	6.50468	5.07826	-0.357145	-1.43024	5e-05	0.00034525	yes
ENSG00000141428.15	ENSG00000141428.15	C18orf21	chr18:35972082-35979286	Prone	Prot	OK	11.122	7.94096	-0.486035	-1.53074	5e-05	0.00034525	yes
ENSG00000141448.7	ENSG00000141448.7	GATA6	chr18:22169442-22205229	Prone	Prot	OK	4.20482	5.28603	0.330142	1.21475	5e-05	0.00034525	yes
ENSG00000141505.10	ENSG00000141505.10	ASGR1	chr17:7173430-7179564	Prone	Prot	OK	8.51892	5.86236	-0.53919	-1.31952	5e-05	0.00034525	yes
ENSG00000141519.13	ENSG00000141519.13	CCDC40	chr17:80036631-80100613	Prone	Prot	OK	1.80984	1.00371	-0.850514	-0.711104	5e-05	0.00034525	yes
ENSG00000141526.13	ENSG00000141526.13	SLC16A3	chr17:82228396-82273731	Prone	Prot	OK	87.0098	38.5665	-1.17383	-3.72355	5e-05	0.00034525	yes
ENSG00000141562.16	ENSG00000141562.16	NARF	chr17:82454272-82490537	Prone	Prot	OK	47.3415	30.7281	-0.623546	-2.61524	5e-05	0.00034525	yes
ENSG00000141696.11	ENSG00000141696.11	P3H4	chr17:41801946-41812604	Prone	Prot	OK	23.7073	16.7118	-0.504468	-1.58171	5e-05	0.00034525	yes
ENSG00000141753.6	ENSG00000141753.6	IGFBP4	chr17:40443460-40457731	Prone	Prot	OK	241.122	315.187	0.386442	2.449	5e-05	0.00034525	yes
ENSG00000141756.17	ENSG00000141756.17	FKBP10	chr17:41812679-41823217	Prone	Prot	OK	104.437	85.2809	-0.292346	-1.38533	5e-05	0.00034525	yes
ENSG00000141933.8	ENSG00000141933.8	TPGS1	chr19:489175-519654	Prone	Prot	OK	6.34588	10.5634	0.735177	1.80108	5e-05	0.00034525	yes
ENSG00000142002.15	ENSG00000142002.15	DPP9	chr19:4675223-4724673	Prone	Prot	OK	13.3767	17.8178	0.413595	1.36942	5e-05	0.00034525	yes
ENSG00000142089.14	ENSG00000142089.14	IFITM3	chr11:318639-330122	Prone	Prot	OK	96.6257	140.57	0.54081	3.07649	5e-05	0.00034525	yes
ENSG00000142156.13	ENSG00000142156.13	COL6A1	chr21:45981736-46005050	Prone	Prot	OK	13.9796	17.7807	0.346988	1.75147	5e-05	0.00034525	yes
ENSG00000142207.6	ENSG00000142207.6	URB1	chr21:32291812-32393026	Prone	Prot	OK	7.25825	5.45307	-0.412554	-1.3432	5e-05	0.00034525	yes
ENSG00000142227.9	ENSG00000142227.9	EMP3	chr19:48296456-48330553	Prone	Prot	OK	40.1928	72.6093	0.853217	3.58913	5e-05	0.00034525	yes
ENSG00000142494.12	ENSG00000142494.12	SLC47A1	chr17:19495384-19597922	Prone	Prot	OK	2.13616	3.14499	0.558031	0.924846	5e-05	0.00034525	yes
ENSG00000142634.11	ENSG00000142634.11	EFHD2	chr1:15409894-15430343	Prone	Prot	OK	13.1523	20.4104	0.633991	3.14775	5e-05	0.00034525	yes
ENSG00000142657.19	ENSG00000142657.19	PGD	chr1:10398591-10420144	Prone	Prot	OK	61.9206	73.8304	0.253797	1.37169	5e-05	0.00034525	yes
ENSG00000142661.17	ENSG00000142661.17	MYOM3	chr1:24040834-24112175	Prone	Prot	OK	0.0912462	1.09299	3.58237	0.992792	5e-05	0.00034525	yes
ENSG00000142669.12	ENSG00000142669.12	SH3BGRL3	chr1:26279175-26320523	Prone	Prot	OK	35.6392	64.7653	0.861755	3.68611	5e-05	0.00034525	yes
ENSG00000142686.7	ENSG00000142686.7	C1orf216	chr1:35713874-35719472	Prone	Prot	OK	6.83376	8.54139	0.321791	1.24217	5e-05	0.00034525	yes
ENSG00000142694.6	ENSG00000142694.6	EVA1B	chr1:36306386-36329221	Prone	Prot	OK	42.6081	56.3295	0.402765	1.56602	5e-05	0.00034525	yes
ENSG00000142871.14	ENSG00000142871.14	CYR61	chr1:85580760-85583962	Prone	Prot	OK	39.4507	18.6342	-1.0821	-4.97715	5e-05	0.00034525	yes
ENSG00000142910.14	ENSG00000142910.14	TINAGL1	chr1:31576484-31587686	Prone	Prot	OK	88.8227	107.886	0.280505	1.52983	5e-05	0.00034525	yes
ENSG00000142949.15	ENSG00000142949.15	PTPRF	chr1:43525186-43623666	Prone	Prot	OK	41.2171	19.9129	-1.04954	-5.39426	5e-05	0.00034525	yes
ENSG00000143067.4	ENSG00000143067.4	ZNF697	chr1:119619421-119647773	Prone	Prot	OK	7.18589	8.60902	0.260682	1.3366	5e-05	0.00034525	yes
ENSG00000143079.13	ENSG00000143079.13	CTTNBP2NL	chr1:112396180-112463456	Prone	Prot	OK	14.6862	20.9779	0.51441	1.99572	5e-05	0.00034525	yes
ENSG00000143127.11	ENSG00000143127.11	ITGA10	chr1:145891207-145910189	Prone	Prot	OK	104.833	128.701	0.295923	1.37875	5e-05	0.00034525	yes
ENSG00000143179.11	ENSG00000143179.11	UCK2	chr1:165724292-165911618	Prone	Prot	OK	24.1385	18.9866	-0.34636	-1.06025	5e-05	0.00034525	yes
ENSG00000143258.14	ENSG00000143258.14	USP21	chr1:161159449-161165723	Prone	Prot	OK	4.74913	6.59275	0.473218	1.123	5e-05	0.00034525	yes
ENSG00000143320.7	ENSG00000143320.7	CRABP2	chr1:156699605-156705816	Prone	Prot	OK	1.37713	0.360874	-1.9321	-0.987828	5e-05	0.00034525	yes
ENSG00000143344.14	ENSG00000143344.14	RGL1	chr1:183636084-183928531	Prone	Prot	OK	12.0288	9.16795	-0.391822	-2.23295	5e-05	0.00034525	yes
ENSG00000143369.13	ENSG00000143369.13	ECM1	chr1:150508061-150513789	Prone	Prot	OK	1.82327	3.56085	0.965699	2.12637	5e-05	0.00034525	yes
ENSG00000143384.11	ENSG00000143384.11	MCL1	chr1:150548561-150579738	Prone	Prot	OK	69.1101	84.3981	0.288313	1.75943	5e-05	0.00034525	yes
ENSG00000143387.11	ENSG00000143387.11	CTSK	chr1:150796207-150808323	Prone	Prot	OK	22.2489	14.3444	-0.633246	-3.07991	5e-05	0.00034525	yes
ENSG00000143393.15	ENSG00000143393.15	PI4KB	chr1:151280023-151327715	Prone	Prot	OK	12.3192	16.0587	0.382438	1.29602	5e-05	0.00034525	yes
ENSG00000143420.16	ENSG00000143420.16	ENSA	chr1:150600850-150629612	Prone	Prot	OK	36.5047	45.1087	0.305325	1.32655	5e-05	0.00034525	yes
ENSG00000143499.12	ENSG00000143499.12	SMYD2	chr1:214281101-214337131	Prone	Prot	OK	14.785	11.9192	-0.310841	-1.25392	5e-05	0.00034525	yes
ENSG00000143515.15	ENSG00000143515.15	ATP8B2	chr1:154325552-154351307	Prone	Prot	OK	25.334	55.7419	1.13769	3.73812	5e-05	0.00034525	yes
ENSG00000143537.12	ENSG00000143537.12	ADAM15	chr1:155033823-155062775	Prone	Prot	OK	133.938	337.155	1.33185	6.82857	5e-05	0.00034525	yes
ENSG00000143669.12	ENSG00000143669.12	LYST	chr1:235661040-235883640	Prone	Prot	OK	3.221	5.88084	0.868512	1.73116	5e-05	0.00034525	yes
ENSG00000143772.8	ENSG00000143772.8	ITPKB	chr1:226631689-226739323	Prone	Prot	OK	22.3861	26.603	0.248984	1.42355	5e-05	0.00034525	yes
ENSG00000143774.15	ENSG00000143774.15	GUK1	chr1:228139961-228148984	Prone	Prot	OK	125.37	183.537	0.549887	3.04127	5e-05	0.00034525	yes
ENSG00000143799.11	ENSG00000143799.11	PARP1	chr1:226360690-226408079	Prone	Prot	OK	17.2387	21.9925	0.351366	1.49329	5e-05	0.00034525	yes
ENSG00000143816.7	ENSG00000143816.7	WNT9A	chr1:227918655-227947898	Prone	Prot	OK	4.75059	6.19288	0.382503	1.6271	5e-05	0.00034525	yes
ENSG00000143819.11	ENSG00000143819.11	EPHX1	chr1:225810091-225882369	Prone	Prot	OK	6.14345	13.3437	1.11904	2.81139	5e-05	0.00034525	yes
ENSG00000143842.13	ENSG00000143842.13	SOX13	chr1:204073114-204127743	Prone	Prot	OK	6.98258	17.9146	1.3593	3.41909	5e-05	0.00034525	yes
ENSG00000143845.13	ENSG00000143845.13	ETNK2	chr1:204131061-204152003	Prone	Prot	OK	5.11013	3.34719	-0.610409	-1.15956	5e-05	0.00034525	yes
ENSG00000143847.14	ENSG00000143847.14	PPFIA4	chr1:203026497-203078740	Prone	Prot	OK	1.58735	0.155501	-3.35162	-0.715452	5e-05	0.00034525	yes
ENSG00000143869.6	ENSG00000143869.6	GDF7	chr2:20666663-20679245	Prone	Prot	OK	1.26786	0.736695	-0.783253	-2.58071	5e-05	0.00034525	yes
ENSG00000143878.9	ENSG00000143878.9	RHOB	chr2:20447073-20449445	Prone	Prot	OK	321.332	181.967	-0.820386	-5.16873	5e-05	0.00034525	yes
ENSG00000144063.3	ENSG00000144063.3	MALL	chr2:110083869-110116566	Prone	Prot	OK	18.8722	55.2488	1.54968	7.08877	5e-05	0.00034525	yes
ENSG00000144136.9	ENSG00000144136.9	SLC20A1	chr2:112645856-112663827	Prone	Prot	OK	32.6899	45.5831	0.479653	1.91106	5e-05	0.00034525	yes
ENSG00000144152.11	ENSG00000144152.11	FBLN7	chr2:112138384-112188216	Prone	Prot	OK	4.22414	2.73554	-0.626832	-1.48298	5e-05	0.00034525	yes
ENSG00000144230.15	ENSG00000144230.15	GPR17	chr2:127638380-127681786	Prone	Prot	OK	1.18679	2.33516	0.976465	1.15876	5e-05	0.00034525	yes
ENSG00000144476.5	ENSG00000144476.5	ACKR3	chr2:236567786-236582358	Prone	Prot	OK	9.04933	4.36284	-1.05254	-3.05635	5e-05	0.00034525	yes
ENSG00000144560.12	ENSG00000144560.12	VGLL4	chr3:11272308-11771350	Prone	Prot	OK	45.5143	54.3948	0.257148	1.11276	5e-05	0.00034525	yes
ENSG00000144645.12	ENSG00000144645.12	OSBPL10	chr3:31657889-32077580	Prone	Prot	OK	18.3532	12.3249	-0.574461	-1.39115	5e-05	0.00034525	yes
ENSG00000144655.13	ENSG00000144655.13	CSRNP1	chr3:39141854-39154562	Prone	Prot	OK	8.23278	5.09167	-0.693242	-2.98463	5e-05	0.00034525	yes
ENSG00000144668.10	ENSG00000144668.10	ITGA9	chr3:37452114-37861780	Prone	Prot	OK	0.332269	2.40829	2.85759	2.06654	5e-05	0.00034525	yes
ENSG00000144724.17	ENSG00000144724.17	PTPRG	chr3:61561568-62369330	Prone	Prot	OK	18.4689	37.5565	1.02396	5.43921	5e-05	0.00034525	yes
ENSG00000144746.6	ENSG00000144746.6	ARL6IP5	chr3:69084943-69106066	Prone	Prot	OK	67.1355	91.0971	0.44033	2.6183	5e-05	0.00034525	yes
ENSG00000144749.12	ENSG00000144749.12	LRIG1	chr3:66133609-66501263	Prone	Prot	OK	22.7456	14.5278	-0.646773	-2.07808	5e-05	0.00034525	yes
ENSG00000144815.13	ENSG00000144815.13	NXPE3	chr3:101779201-101861022	Prone	Prot	OK	6.01874	10.2473	0.767708	1.96914	5e-05	0.00034525	yes
ENSG00000144824.18	ENSG00000144824.18	PHLDB2	chr3:111674675-111976517	Prone	Prot	OK	17.1505	13.4846	-0.346934	-1.23134	5e-05	0.00034525	yes
ENSG00000144959.8	ENSG00000144959.8	NCEH1	chr3:172630248-172711218	Prone	Prot	OK	3.22431	5.49799	0.769912	2.20988	5e-05	0.00034525	yes
ENSG00000145220.12	ENSG00000145220.12	LYAR	chr4:4267700-4290169	Prone	Prot	OK	4.84451	8.05985	0.734403	2.6821	5e-05	0.00034525	yes
ENSG00000145247.10	ENSG00000145247.10	OCIAD2	chr4:48885018-48906937	Prone	Prot	OK	41.1601	26.7275	-0.622921	-2.3186	5e-05	0.00034525	yes
ENSG00000145284.10	ENSG00000145284.10	SCD5	chr4:82629538-82798857	Prone	Prot	OK	30.2792	25.5863	-0.242954	-1.40181	5e-05	0.00034525	yes
ENSG00000145335.14	ENSG00000145335.14	SNCA	chr4:89551355-89841978	Prone	Prot	OK	45.767	36.5059	-0.32618	-1.5976	5e-05	0.00034525	yes
ENSG00000145365.10	ENSG00000145365.10	TIFA	chr4:112274541-112442620	Prone	Prot	OK	8.34648	5.51206	-0.598576	-1.39068	5e-05	0.00034525	yes
ENSG00000145555.13	ENSG00000145555.13	MYO10	chr5:16661913-16936276	Prone	Prot	OK	36.1454	23.6511	-0.611907	-2.38148	5e-05	0.00034525	yes
ENSG00000145632.13	ENSG00000145632.13	PLK2	chr5:58453981-58460260	Prone	Prot	OK	162.45	250.752	0.626266	2.04151	5e-05	0.00034525	yes
ENSG00000145780.7	ENSG00000145780.7	FEM1C	chr5:115520907-115544894	Prone	Prot	OK	6.09195	7.08757	0.218385	1.14482	5e-05	0.00034525	yes
ENSG00000145817.15	ENSG00000145817.15	YIPF5	chr5:144158158-144170714	Prone	Prot	OK	38.804	28.2106	-0.459968	-2.00464	5e-05	0.00034525	yes
ENSG00000145907.13	ENSG00000145907.13	G3BP1	chr5:151742315-151812785	Prone	Prot	OK	58.1334	70.1071	0.270195	1.2333	5e-05	0.00034525	yes
ENSG00000145911.5	ENSG00000145911.5	N4BP3	chr5:178113442-178126087	Prone	Prot	OK	18.5635	11.5542	-0.684053	-3.9853	5e-05	0.00034525	yes
ENSG00000145990.9	ENSG00000145990.9	GFOD1	chr6:13357829-13487662	Prone	Prot	OK	9.77778	16.2889	0.736308	3.44703	5e-05	0.00034525	yes
ENSG00000146054.16	ENSG00000146054.16	TRIM7	chr5:181191923-181205293	Prone	Prot	OK	5.20774	7.64615	0.554076	1.11133	5e-05	0.00034525	yes
ENSG00000146072.6	ENSG00000146072.6	TNFRSF21	chr6:47231531-47309905	Prone	Prot	OK	10.9047	9.35507	-0.221132	-1.14162	5e-05	0.00034525	yes
ENSG00000146242.7	ENSG00000146242.7	TPBG	chr6:82363205-82370828	Prone	Prot	OK	6.00562	4.38888	-0.45246	-1.71388	5e-05	0.00034525	yes
ENSG00000146281.5	ENSG00000146281.5	PM20D2	chr6:89146049-89165565	Prone	Prot	OK	3.42295	2.57888	-0.408497	-1.62133	5e-05	0.00034525	yes
ENSG00000146376.9	ENSG00000146376.9	ARHGAP18	chr6:129576131-129710225	Prone	Prot	OK	42.5095	29.1585	-0.54387	-3.41217	5e-05	0.00034525	yes
ENSG00000146433.8	ENSG00000146433.8	TMEM181	chr6:158536435-158635428	Prone	Prot	OK	29.0053	20.9677	-0.468144	-2.84659	5e-05	0.00034525	yes
ENSG00000146674.13	ENSG00000146674.13	IGFBP3	chr7:45912244-45921874	Prone	Prot	OK	5.11546	0.855832	-2.57946	-2.89662	5e-05	0.00034525	yes
ENSG00000146729.8	ENSG00000146729.8	GBAS	chr7:55887276-56000181	Prone	Prot	OK	21.5094	17.4496	-0.301771	-1.13928	5e-05	0.00034525	yes
ENSG00000146858.7	ENSG00000146858.7	ZC3HAV1L	chr7:139025705-139036029	Prone	Prot	OK	5.42275	3.73571	-0.537642	-1.63504	5e-05	0.00034525	yes
ENSG00000146859.6	ENSG00000146859.6	TMEM140	chr7:134986507-135170795	Prone	Prot	OK	13.3117	17.6098	0.403683	1.68113	5e-05	0.00034525	yes
ENSG00000147044.19	ENSG00000147044.19	CASK	chrX:41514933-41923463	Prone	Prot	OK	6.21562	9.51109	0.613714	1.31395	5e-05	0.00034525	yes
ENSG00000147065.15	ENSG00000147065.15	MSN	chrX:65588376-65741931	Prone	Prot	OK	137.474	154.514	0.168581	1.05189	5e-05	0.00034525	yes
ENSG00000147155.9	ENSG00000147155.9	EBP	chrX:48521157-48528716	Prone	Prot	OK	14.7077	19.6726	0.419614	1.31986	5e-05	0.00034525	yes
ENSG00000147202.16	ENSG00000147202.16	DIAPH2	chrX:96684662-97642589	Prone	Prot	OK	9.94639	8.44047	-0.23685	-1.25852	5e-05	0.00034525	yes
ENSG00000147251.14	ENSG00000147251.14	DOCK11	chrX:118495897-118686163	Prone	Prot	OK	1.52893	1.97449	0.368961	1.559	5e-05	0.00034525	yes
ENSG00000147274.13	ENSG00000147274.13	RBMX	chrX:136840930-136880764	Prone	Prot	OK	93.8234	73.8815	-0.344735	-1.86859	5e-05	0.00034525	yes
ENSG00000147383.9	ENSG00000147383.9	NSDHL	chrX:152830966-152869729	Prone	Prot	OK	4.56868	6.23687	0.449045	1.56082	5e-05	0.00034525	yes
ENSG00000147408.13	ENSG00000147408.13	CSGALNACT1	chr8:19404160-19758029	Prone	Prot	OK	93.6158	68.3927	-0.45291	-1.39387	5e-05	0.00034525	yes
ENSG00000147454.12	ENSG00000147454.12	SLC25A37	chr8:23528804-23575463	Prone	Prot	OK	32.2691	17.4119	-0.890081	-3.3003	5e-05	0.00034525	yes
ENSG00000147509.12	ENSG00000147509.12	RGS20	chr8:53851807-53959303	Prone	Prot	OK	2.75936	1.60502	-0.781737	-1.00294	5e-05	0.00034525	yes
ENSG00000147526.18	ENSG00000147526.18	TACC1	chr8:38728185-38853028	Prone	Prot	OK	77.7282	113.646	0.548042	2.08321	5e-05	0.00034525	yes
ENSG00000147642.15	ENSG00000147642.15	SYBU	chr8:109573977-109691791	Prone	Prot	OK	1.39826	2.90799	1.05639	0.886205	5e-05	0.00034525	yes
ENSG00000147697.7	ENSG00000147697.7	GSDMC	chr8:129748195-129786888	Prone	Prot	OK	0.127387	1.98736	3.96357	1.00567	5e-05	0.00034525	yes
ENSG00000147852.14	ENSG00000147852.14	VLDLR	chr9:2422701-2660053	Prone	Prot	OK	0.969983	0.293324	-1.72546	-1.30429	5e-05	0.00034525	yes
ENSG00000147862.13	ENSG00000147862.13	NFIB	chr9:14081842-14398983	Prone	Prot	OK	38.2454	32.3669	-0.240769	-1.15306	5e-05	0.00034525	yes
ENSG00000147872.8	ENSG00000147872.8	PLIN2	chr9:19108374-19149290	Prone	Prot	OK	39.9162	28.1198	-0.505391	-2.69501	5e-05	0.00034525	yes
ENSG00000148110.14	ENSG00000148110.14	HIATL1	chr9:94374550-94461042	Prone	Prot	OK	17.3783	20.854	0.263036	1.48905	5e-05	0.00034525	yes
ENSG00000148120.13	ENSG00000148120.13	C9orf3	chr9:94726700-95087218	Prone	Prot	OK	18.6391	45.0467	1.27309	4.7234	5e-05	0.00034525	yes
ENSG00000148154.8	ENSG00000148154.8	UGCG	chr9:111896765-111935369	Prone	Prot	OK	16.3696	10.2185	-0.679832	-2.68188	5e-05	0.00034525	yes
ENSG00000148175.11	ENSG00000148175.11	STOM	chr9:121338987-121370304	Prone	Prot	OK	137	179.122	0.386769	1.99731	5e-05	0.00034525	yes
ENSG00000148180.15	ENSG00000148180.15	GSN	chr9:121178136-121332843	Prone	Prot	OK	230.511	338.607	0.554776	2.99439	5e-05	0.00034525	yes
ENSG00000148248.12	ENSG00000148248.12	SURF4	chr9:133361448-133376166	Prone	Prot	OK	104.75	89.6516	-0.224549	-1.34179	5e-05	0.00034525	yes
ENSG00000148288.10	ENSG00000148288.10	GBGT1	chr9:133152947-133163945	Prone	Prot	OK	18.3564	14.0303	-0.387742	-1.41484	5e-05	0.00034525	yes
ENSG00000148331.10	ENSG00000148331.10	ASB6	chr9:129608883-129642169	Prone	Prot	OK	6.82811	8.44385	0.306413	1.18975	5e-05	0.00034525	yes
ENSG00000148400.9	ENSG00000148400.9	NOTCH1	chr9:136494443-136545862	Prone	Prot	OK	30.402	42.2109	0.47345	2.11521	5e-05	0.00034525	yes
ENSG00000148411.6	ENSG00000148411.6	NACC2	chr9:136006536-136095285	Prone	Prot	OK	8.76072	10.2271	0.223279	1.16731	5e-05	0.00034525	yes
ENSG00000148488.14	ENSG00000148488.14	ST8SIA6	chr10:17318382-17454330	Prone	Prot	OK	2.0721	5.91744	1.51388	3.82098	5e-05	0.00034525	yes
ENSG00000148672.8	ENSG00000148672.8	GLUD1	chr10:87050485-87191468	Prone	Prot	OK	42.7448	53.9903	0.336951	1.78406	5e-05	0.00034525	yes
ENSG00000148677.6	ENSG00000148677.6	ANKRD1	chr10:90912095-90921276	Prone	Prot	OK	53.5125	37.9811	-0.494596	-3.0432	5e-05	0.00034525	yes
ENSG00000148700.12	ENSG00000148700.12	ADD3	chr10:109940103-110135565	Prone	Prot	OK	36.4685	29.0899	-0.326133	-1.00728	5e-05	0.00034525	yes
ENSG00000148737.14	ENSG00000148737.14	TCF7L2	chr10:112950249-113167678	Prone	Prot	OK	0.817486	1.64732	1.01086	0.656951	5e-05	0.00034525	yes
ENSG00000148841.14	ENSG00000148841.14	ITPRIP	chr10:104309697-104338404	Prone	Prot	OK	19.3908	28.7585	0.568615	3.28176	5e-05	0.00034525	yes
ENSG00000148843.12	ENSG00000148843.12	PDCD11	chr10:103396647-103446292	Prone	Prot	OK	17.4214	8.14691	-1.09654	-3.2387	5e-05	0.00034525	yes
ENSG00000148926.8	ENSG00000148926.8	ADM	chr11:10304679-10307397	Prone	Prot	OK	138.488	35.8029	-1.95161	-8.73294	5e-05	0.00034525	yes
ENSG00000149091.14	ENSG00000149091.14	DGKZ	chr11:46332904-46380554	Prone	Prot	OK	20.1201	24.8273	0.303288	1.25296	5e-05	0.00034525	yes
ENSG00000149115.12	ENSG00000149115.12	TNKS1BP1	chr11:57299637-57324952	Prone	Prot	OK	29.8007	42.1171	0.499062	1.56558	5e-05	0.00034525	yes
ENSG00000149218.4	ENSG00000149218.4	ENDOD1	chr11:95089809-95132645	Prone	Prot	OK	10.6511	20.0176	0.910259	5.31537	5e-05	0.00034525	yes
ENSG00000149380.10	ENSG00000149380.10	P4HA3	chr11:74012713-74324705	Prone	Prot	OK	17.6028	9.62481	-0.870973	-3.06611	5e-05	0.00034525	yes
ENSG00000149564.10	ENSG00000149564.10	ESAM	chr11:124752582-124765936	Prone	Prot	OK	110.407	130.025	0.235962	1.44803	5e-05	0.00034525	yes
ENSG00000149573.7	ENSG00000149573.7	MPZL2	chr11:118253402-118264536	Prone	Prot	OK	141.124	189.744	0.427093	2.26942	5e-05	0.00034525	yes
ENSG00000149639.13	ENSG00000149639.13	SOGA1	chr20:36777441-36863686	Prone	Prot	OK	2.58417	4.29078	0.731539	1.90537	5e-05	0.00034525	yes
ENSG00000149782.10	ENSG00000149782.10	PLCB3	chr11:64251522-64269150	Prone	Prot	OK	18.328	29.9	0.706096	2.5911	5e-05	0.00034525	yes
ENSG00000149798.4	ENSG00000149798.4	CDC42EP2	chr11:65314817-65322429	Prone	Prot	OK	10.5089	21.4312	1.0281	4.79383	5e-05	0.00034525	yes
ENSG00000149925.15	ENSG00000149925.15	ALDOA	chr16:30053089-30070457	Prone	Prot	OK	569.017	343.653	-0.727516	-3.79852	5e-05	0.00034525	yes
ENSG00000149930.16	ENSG00000149930.16	TAOK2	chr16:29973640-29992261	Prone	Prot	OK	38.0885	44.4399	0.222501	1.28872	5e-05	0.00034525	yes
ENSG00000150048.9	ENSG00000150048.9	CLEC1A	chr12:10069553-10111627	Prone	Prot	OK	5.86371	4.22707	-0.472156	-1.20835	5e-05	0.00034525	yes
ENSG00000150093.17	ENSG00000150093.17	ITGB1	chr10:32900318-33082102	Prone	Prot	OK	397.442	331.145	-0.263282	-1.17203	5e-05	0.00034525	yes
ENSG00000150347.13	ENSG00000150347.13	ARID5B	chr10:61901299-62096944	Prone	Prot	OK	1.13267	1.88808	0.737198	2.66095	5e-05	0.00034525	yes
ENSG00000150510.14	ENSG00000150510.14	FAM124A	chr13:51222333-51284241	Prone	Prot	OK	1.91059	3.59325	0.911271	2.29651	5e-05	0.00034525	yes
ENSG00000150540.12	ENSG00000150540.12	HNMT	chr2:137964019-138016364	Prone	Prot	OK	9.20006	5.02579	-0.872293	-1.93891	5e-05	0.00034525	yes
ENSG00000150630.3	ENSG00000150630.3	VEGFC	chr4:176669620-176792727	Prone	Prot	OK	4.46606	1.72499	-1.37241	-3.69826	5e-05	0.00034525	yes
ENSG00000150712.9	ENSG00000150712.9	MTMR12	chr5:32226993-32313009	Prone	Prot	OK	14.4629	10.7894	-0.422749	-1.64237	5e-05	0.00034525	yes
ENSG00000150756.12	ENSG00000150756.12	FAM173B	chr5:10226329-10249915	Prone	Prot	OK	6.84114	9.71154	0.505463	1.28254	5e-05	0.00034525	yes
ENSG00000150764.12	ENSG00000150764.12	DIXDC1	chr11:111927143-112022584	Prone	Prot	OK	8.25484	6.65776	-0.310205	-1.30014	5e-05	0.00034525	yes
ENSG00000150938.8	ENSG00000150938.8	CRIM1	chr2:36355925-36646087	Prone	Prot	OK	166.441	102.817	-0.694931	-2.2745	5e-05	0.00034525	yes
ENSG00000150961.13	ENSG00000150961.13	SEC24D	chr4:118722822-118838683	Prone	Prot	OK	22.3165	17.4536	-0.35459	-1.2148	5e-05	0.00034525	yes
ENSG00000150977.10	ENSG00000150977.10	RILPL2	chr12:123410682-123436717	Prone	Prot	OK	4.03299	5.70582	0.500586	2.48143	5e-05	0.00034525	yes
ENSG00000151135.8	ENSG00000151135.8	TMEM263	chr12:106955718-106987166	Prone	Prot	OK	33.8326	26.3111	-0.362738	-1.78014	5e-05	0.00034525	yes
ENSG00000151151.5	ENSG00000151151.5	IPMK	chr10:58191516-58267934	Prone	Prot	OK	3.74642	2.86303	-0.387972	-1.72636	5e-05	0.00034525	yes
ENSG00000151176.6	ENSG00000151176.6	PLBD2	chr12:113298758-113391625	Prone	Prot	OK	5.42999	7.79711	0.521988	1.2999	5e-05	0.00034525	yes
ENSG00000151276.22	ENSG00000151276.22	MAGI1	chr3:65353524-66038834	Prone	Prot	OK	13.8849	7.34954	-0.917794	-2.8729	5e-05	0.00034525	yes
ENSG00000151338.17	ENSG00000151338.17	MIPOL1	chr14:37197912-37552361	Prone	Prot	OK	5.97377	4.03854	-0.564809	-1.45438	5e-05	0.00034525	yes
ENSG00000151458.10	ENSG00000151458.10	ANKRD50	chr4:124664051-124712732	Prone	Prot	OK	11.3856	9.35	-0.284166	-1.68202	5e-05	0.00034525	yes
ENSG00000151640.11	ENSG00000151640.11	DPYSL4	chr10:132186899-132205776	Prone	Prot	OK	7.79922	4.9717	-0.649591	-1.78161	5e-05	0.00034525	yes
ENSG00000151689.11	ENSG00000151689.11	INPP1	chr2:189879608-190371665	Prone	Prot	OK	14.8729	21.1943	0.510995	1.65478	5e-05	0.00034525	yes
ENSG00000151692.13	ENSG00000151692.13	RNF144A	chr2:6912276-7077880	Prone	Prot	OK	4.03653	2.46608	-0.710899	-1.17091	5e-05	0.00034525	yes
ENSG00000152128.13	ENSG00000152128.13	TMEM163	chr2:134455758-134719000	Prone	Prot	OK	2.16925	1.35063	-0.683565	-1.45194	5e-05	0.00034525	yes
ENSG00000152137.5	ENSG00000152137.5	HSPB8	chr12:119178641-119221131	Prone	Prot	OK	2.34996	4.31587	0.877018	2.23795	5e-05	0.00034525	yes
ENSG00000152192.7	ENSG00000152192.7	POU4F1	chr13:77895480-78659179	Prone	Prot	OK	2.33877	3.26974	0.483425	1.24834	5e-05	0.00034525	yes
ENSG00000152332.14	ENSG00000152332.14	UHMK1	chr1:162497250-162529629	Prone	Prot	OK	25.7239	22.5168	-0.192108	-1.19716	5e-05	0.00034525	yes
ENSG00000152377.11	ENSG00000152377.11	SPOCK1	chr5:136975297-137598379	Prone	Prot	OK	30.505	17.1861	-0.827801	-1.72212	5e-05	0.00034525	yes
ENSG00000152558.13	ENSG00000152558.13	TMEM123	chr11:102396331-102498801	Prone	Prot	OK	97.762	112.687	0.204973	1.27762	5e-05	0.00034525	yes
ENSG00000152642.9	ENSG00000152642.9	GPD1L	chr3:32105688-32168713	Prone	Prot	OK	5.51389	9.31693	0.756785	3.04355	5e-05	0.00034525	yes
ENSG00000152661.7	ENSG00000152661.7	GJA1	chr6:121435691-121449727	Prone	Prot	OK	145.549	81.186	-0.842203	-5.37921	5e-05	0.00034525	yes
ENSG00000152689.16	ENSG00000152689.16	RASGRP3	chr2:33436323-33564750	Prone	Prot	OK	28.4099	46.492	0.710587	2.16629	5e-05	0.00034525	yes
ENSG00000152749.7	ENSG00000152749.7	GPR180	chr13:94601902-94634645	Prone	Prot	OK	4.46123	3.51484	-0.343983	-1.76398	5e-05	0.00034525	yes
ENSG00000152778.8	ENSG00000152778.8	IFIT5	chr10:89414585-89421001	Prone	Prot	OK	4.66757	5.74665	0.30005	1.38998	5e-05	0.00034525	yes
ENSG00000152804.9	ENSG00000152804.9	HHEX	chr10:92689950-92695646	Prone	Prot	OK	48.6652	41.5479	-0.228118	-1.23437	5e-05	0.00034525	yes
ENSG00000152939.13	ENSG00000152939.13	MARVELD2	chr5:69415111-69444330	Prone	Prot	OK	2.13458	1.40584	-0.602521	-1.25532	5e-05	0.00034525	yes
ENSG00000152952.10	ENSG00000152952.10	PLOD2	chr3:146064041-146163653	Prone	Prot	OK	116.265	49.8305	-1.22232	-5.64911	5e-05	0.00034525	yes
ENSG00000152953.11	ENSG00000152953.11	STK32B	chr4:5051441-5500998	Prone	Prot	OK	9.16981	7.30972	-0.327074	-1.44966	5e-05	0.00034525	yes
ENSG00000153048.9	ENSG00000153048.9	CARHSP1	chr16:8674564-8869012	Prone	Prot	OK	35.7793	55.6588	0.637484	1.91519	5e-05	0.00034525	yes
ENSG00000153179.10	ENSG00000153179.10	RASSF3	chr12:64610512-64697567	Prone	Prot	OK	20.0995	24.0343	0.257936	1.26982	5e-05	0.00034525	yes
ENSG00000153208.15	ENSG00000153208.15	MERTK	chr2:111898478-112029561	Prone	Prot	OK	23.9856	15.4264	-0.636764	-2.26672	5e-05	0.00034525	yes
ENSG00000153233.11	ENSG00000153233.11	PTPRR	chr12:70638072-70920843	Prone	Prot	OK	2.97537	4.04406	0.442736	1.306	5e-05	0.00034525	yes
ENSG00000153310.17	ENSG00000153310.17	FAM49B	chr8:129832300-130017129	Prone	Prot	OK	15.9015	19.7094	0.309728	1.14357	5e-05	0.00034525	yes
ENSG00000153714.5	ENSG00000153714.5	LURAP1L	chr9:12685438-12822131	Prone	Prot	OK	1.41371	2.13597	0.595407	1.10703	5e-05	0.00034525	yes
ENSG00000153904.17	ENSG00000153904.17	DDAH1	chr1:85266247-85578363	Prone	Prot	OK	15.2443	11.026	-0.467363	-1.54306	5e-05	0.00034525	yes
ENSG00000153989.7	ENSG00000153989.7	NUS1	chr6:117675501-117710640	Prone	Prot	OK	7.42047	6.14397	-0.272339	-1.37085	5e-05	0.00034525	yes
ENSG00000154016.12	ENSG00000154016.12	GRAP	chr17:18950344-19047637	Prone	Prot	OK	32.3431	16.159	-1.00112	-3.92724	5e-05	0.00034525	yes
ENSG00000154122.11	ENSG00000154122.11	ANKH	chr5:14704803-14871778	Prone	Prot	OK	6.77234	11.0474	0.705985	1.2954	5e-05	0.00034525	yes
ENSG00000154174.7	ENSG00000154174.7	TOMM70A	chr3:100363430-100456319	Prone	Prot	OK	17.1003	14.5005	-0.237913	-1.17107	5e-05	0.00034525	yes
ENSG00000154262.11	ENSG00000154262.11	ABCA6	chr17:69078701-69141888	Prone	Prot	OK	18.1898	13.8015	-0.398307	-1.57567	5e-05	0.00034525	yes
ENSG00000154529.13	ENSG00000154529.13	CNTNAP3B	chr9:41890313-42129510	Prone	Prot	OK	26.9326	18.0529	-0.577128	-1.65986	5e-05	0.00034525	yes
ENSG00000154556.16	ENSG00000154556.16	SORBS2	chr4:185585443-185956652	Prone	Prot	OK	18.0905	25.3884	0.488942	1.36757	5e-05	0.00034525	yes
ENSG00000154639.17	ENSG00000154639.17	CXADR	chr21:17512381-17593579	Prone	Prot	OK	5.27738	1.96661	-1.42411	-2.91039	5e-05	0.00034525	yes
ENSG00000154640.13	ENSG00000154640.13	BTG3	chr21:17593652-17633199	Prone	Prot	OK	11.8258	7.97123	-0.569066	-1.63464	5e-05	0.00034525	yes
ENSG00000154734.13	ENSG00000154734.13	ADAMTS1	chr21:26835746-26845409	Prone	Prot	OK	3.41912	38.0053	3.4745	9.87332	5e-05	0.00034525	yes
ENSG00000154783.9	ENSG00000154783.9	FGD5	chr3:14818961-15065335	Prone	Prot	OK	27.9316	35.4386	0.343426	1.37067	5e-05	0.00034525	yes
ENSG00000154822.14	ENSG00000154822.14	PLCL2	chr3:16802650-17090594	Prone	Prot	OK	2.1282	2.66402	0.323974	1.18507	5e-05	0.00034525	yes
ENSG00000155011.7	ENSG00000155011.7	DKK2	chr4:106921801-107301870	Prone	Prot	OK	3.03473	6.0413	0.993291	3.61804	5e-05	0.00034525	yes
ENSG00000155016.16	ENSG00000155016.16	CYP2U1	chr4:107824562-107978799	Prone	Prot	OK	4.76819	7.16122	0.586762	1.90765	5e-05	0.00034525	yes
ENSG00000155090.13	ENSG00000155090.13	KLF10	chr8:102648778-102655902	Prone	Prot	OK	11.658	15.0048	0.364112	1.96412	5e-05	0.00034525	yes
ENSG00000155093.16	ENSG00000155093.16	PTPRN2	chr7:157539055-158587788	Prone	Prot	OK	1.31052	0.857191	-0.612448	-1.53462	5e-05	0.00034525	yes
ENSG00000155096.12	ENSG00000155096.12	AZIN1	chr8:102826356-102977876	Prone	Prot	OK	30.6207	24.7053	-0.309688	-1.53458	5e-05	0.00034525	yes
ENSG00000155189.10	ENSG00000155189.10	AGPAT5	chr8:6708356-6759666	Prone	Prot	OK	34.9393	27.7508	-0.33232	-1.75338	5e-05	0.00034525	yes
ENSG00000155254.11	ENSG00000155254.11	MARVELD1	chr10:97713172-97718152	Prone	Prot	OK	26.0767	36.7132	0.493537	2.62824	5e-05	0.00034525	yes
ENSG00000155304.5	ENSG00000155304.5	HSPA13	chr21:14371114-14383484	Prone	Prot	OK	17.2219	14.5325	-0.244964	-1.4091	5e-05	0.00034525	yes
ENSG00000155363.17	ENSG00000155363.17	MOV10	chr1:112673140-112700746	Prone	Prot	OK	21.0293	26.7914	0.34937	1.21058	5e-05	0.00034525	yes
ENSG00000155366.15	ENSG00000155366.15	RHOC	chr1:112701105-112715477	Prone	Prot	OK	272.986	377.022	0.465823	2.88723	5e-05	0.00034525	yes
ENSG00000155380.10	ENSG00000155380.10	SLC16A1	chr1:112911846-112999496	Prone	Prot	OK	27.2337	33.0358	0.278638	1.32557	5e-05	0.00034525	yes
ENSG00000155849.14	ENSG00000155849.14	ELMO1	chr7:36854360-37449249	Prone	Prot	OK	11.3483	17.1833	0.598531	1.42874	5e-05	0.00034525	yes
ENSG00000155903.10	ENSG00000155903.10	RASA2	chr3:141487046-141615342	Prone	Prot	OK	5.52088	4.27871	-0.367723	-1.05066	5e-05	0.00034525	yes
ENSG00000155962.11	ENSG00000155962.11	CLIC2	chrX:155276210-155334657	Prone	Prot	OK	7.94624	16.6321	1.06562	3.43313	5e-05	0.00034525	yes
ENSG00000156049.6	ENSG00000156049.6	GNA14	chr9:77423078-77648307	Prone	Prot	OK	3.22373	4.68588	0.539588	1.7769	5e-05	0.00034525	yes
ENSG00000156273.14	ENSG00000156273.14	BACH1	chr21:29193479-29940033	Prone	Prot	OK	13.9692	9.33969	-0.580805	-1.29174	5e-05	0.00034525	yes
ENSG00000156298.11	ENSG00000156298.11	TSPAN7	chrX:37349274-38688920	Prone	Prot	OK	21.7252	35.2416	0.697908	1.28085	5e-05	0.00034525	yes
ENSG00000156384.13	ENSG00000156384.13	SFR1	chr10:104122057-104126385	Prone	Prot	OK	5.94489	10.7179	0.850299	2.596	5e-05	0.00034525	yes
ENSG00000156466.9	ENSG00000156466.9	GDF6	chr8:96142329-96160792	Prone	Prot	OK	1.46202	0.22734	-2.68504	-2.25163	5e-05	0.00034525	yes
ENSG00000156521.12	ENSG00000156521.12	TYSND1	chr10:70137980-70146676	Prone	Prot	OK	2.52014	3.51995	0.482051	1.58275	5e-05	0.00034525	yes
ENSG00000156587.14	ENSG00000156587.14	UBE2L6	chr11:57551655-57568284	Prone	Prot	OK	32.0008	38.0047	0.24807	1.33114	5e-05	0.00034525	yes
ENSG00000156642.15	ENSG00000156642.15	NPTN	chr15:73443157-73634134	Prone	Prot	OK	41.733	58.2928	0.482128	2.17976	5e-05	0.00034525	yes
ENSG00000156804.6	ENSG00000156804.6	FBXO32	chr8:123497888-123541206	Prone	Prot	OK	7.14634	4.07992	-0.808663	-1.57144	5e-05	0.00034525	yes
ENSG00000157020.16	ENSG00000157020.16	SEC13	chr3:10248022-10321178	Prone	Prot	OK	80.239	62.6247	-0.357571	-1.81962	5e-05	0.00034525	yes
ENSG00000157107.12	ENSG00000157107.12	FCHO2	chr5:72955980-73090522	Prone	Prot	OK	13.4115	19.9913	0.575907	1.43648	5e-05	0.00034525	yes
ENSG00000157110.14	ENSG00000157110.14	RBPMS	chr8:30382118-30572261	Prone	Prot	OK	8.12835	11.8372	0.542293	1.08746	5e-05	0.00034525	yes
ENSG00000157111.11	ENSG00000157111.11	TMEM171	chr5:73120291-73131817	Prone	Prot	OK	2.15329	6.71978	1.64187	3.94176	5e-05	0.00034525	yes
ENSG00000157193.13	ENSG00000157193.13	LRP8	chr1:53226891-53328070	Prone	Prot	OK	5.33359	7.82561	0.553097	1.10619	5e-05	0.00034525	yes
ENSG00000157227.11	ENSG00000157227.11	MMP14	chr14:22836556-22849027	Prone	Prot	OK	165.054	204.002	0.305652	1.68806	5e-05	0.00034525	yes
ENSG00000157259.6	ENSG00000157259.6	GATAD1	chr7:92447452-92528531	Prone	Prot	OK	17.3844	14.0692	-0.305252	-1.19888	5e-05	0.00034525	yes
ENSG00000157350.11	ENSG00000157350.11	ST3GAL2	chr16:70375977-70439237	Prone	Prot	OK	16.7485	25.2004	0.589417	2.08248	5e-05	0.00034525	yes
ENSG00000157404.14	ENSG00000157404.14	KIT	chr4:54657917-54740715	Prone	Prot	OK	9.00669	3.44275	-1.38743	-5.02406	5e-05	0.00034525	yes
ENSG00000157483.7	ENSG00000157483.7	MYO1E	chr15:59105077-59523549	Prone	Prot	OK	93.9637	61.5931	-0.609334	-1.72066	5e-05	0.00034525	yes
ENSG00000157514.15	ENSG00000157514.15	TSC22D3	chrX:107713220-107777342	Prone	Prot	OK	25.4008	58.4889	1.20329	5.61738	5e-05	0.00034525	yes
ENSG00000157557.10	ENSG00000157557.10	ETS2	chr21:38805306-38824955	Prone	Prot	OK	22.8468	48.9784	1.10015	5.66267	5e-05	0.00034525	yes
ENSG00000157601.12	ENSG00000157601.12	MX1	chr21:41420303-41459214	Prone	Prot	OK	3.09236	6.78171	1.13294	1.87575	5e-05	0.00034525	yes
ENSG00000157827.18	ENSG00000157827.18	FMNL2	chr2:152335236-152649834	Prone	Prot	OK	27.9778	20.0384	-0.481516	-2.50754	5e-05	0.00034525	yes
ENSG00000157873.16	ENSG00000157873.16	TNFRSF14	chr1:2549919-2565382	Prone	Prot	OK	53.2403	44.7771	-0.249758	-1.18179	5e-05	0.00034525	yes
ENSG00000157978.10	ENSG00000157978.10	LDLRAP1	chr1:25543579-25568886	Prone	Prot	OK	8.26073	11.265	0.447505	1.612	5e-05	0.00034525	yes
ENSG00000158062.19	ENSG00000158062.19	UBXN11	chr1:26279175-26320523	Prone	Prot	OK	5.54378	8.00079	0.529271	1.19474	5e-05	0.00034525	yes
ENSG00000158186.11	ENSG00000158186.11	MRAS	chr3:138347647-138405534	Prone	Prot	OK	3.15849	6.40086	1.01903	1.68599	5e-05	0.00034525	yes
ENSG00000158195.9	ENSG00000158195.9	WASF2	chr1:27404225-27490158	Prone	Prot	OK	23.5532	18.955	-0.313344	-1.92362	5e-05	0.00034525	yes
ENSG00000158270.11	ENSG00000158270.11	COLEC12	chr18:316736-500722	Prone	Prot	OK	14.0249	10.072	-0.477639	-2.61971	5e-05	0.00034525	yes
ENSG00000158290.15	ENSG00000158290.15	CUL4B	chrX:120524608-120575794	Prone	Prot	OK	33.8572	26.3551	-0.361384	-1.70898	5e-05	0.00034525	yes
ENSG00000158292.6	ENSG00000158292.6	GPR153	chr1:6247345-6260975	Prone	Prot	OK	2.46406	1.58767	-0.634129	-1.7787	5e-05	0.00034525	yes
ENSG00000158406.3	ENSG00000158406.3	HIST1H4H	chr6:26285112-26285509	Prone	Prot	OK	99.4471	121.373	0.287447	1.38105	5e-05	0.00034525	yes
ENSG00000158470.5	ENSG00000158470.5	B4GALT5	chr20:49632944-49713878	Prone	Prot	OK	33.2707	52.8331	0.667189	4.23999	5e-05	0.00034525	yes
ENSG00000158552.11	ENSG00000158552.11	ZFAND2B	chr2:219195236-219209651	Prone	Prot	OK	12.9065	16.7318	0.3745	1.29191	5e-05	0.00034525	yes
ENSG00000158683.6	ENSG00000158683.6	PKD1L1	chr7:47695729-47979581	Prone	Prot	OK	3.91821	6.11742	0.642729	1.57594	5e-05	0.00034525	yes
ENSG00000158716.7	ENSG00000158716.7	DUSP23	chr1:159780931-159782543	Prone	Prot	OK	42.0268	56.357	0.423285	1.92284	5e-05	0.00034525	yes
ENSG00000158747.12	ENSG00000158747.12	NBL1	chr1:19596976-19658456	Prone	Prot	OK	44.1961	29.1802	-0.598926	-2.68225	5e-05	0.00034525	yes
ENSG00000158856.16	ENSG00000158856.16	DMTN	chr8:22048994-22082527	Prone	Prot	OK	3.15888	4.70939	0.576126	0.89997	5e-05	0.00034525	yes
ENSG00000158859.9	ENSG00000158859.9	ADAMTS4	chr1:161184307-161214395	Prone	Prot	OK	5.00256	12.9444	1.3716	2.28419	5e-05	0.00034525	yes
ENSG00000158966.12	ENSG00000158966.12	CACHD1	chr1:64470791-64693058	Prone	Prot	OK	1.62444	1.01262	-0.681852	-1.40856	5e-05	0.00034525	yes
ENSG00000159167.10	ENSG00000159167.10	STC1	chr8:23841914-23854807	Prone	Prot	OK	7.43076	4.29767	-0.789954	-3.37613	5e-05	0.00034525	yes
ENSG00000159176.12	ENSG00000159176.12	CSRP1	chr1:201483529-201533608	Prone	Prot	OK	111.233	94.0391	-0.242252	-1.16788	5e-05	0.00034525	yes
ENSG00000159314.10	ENSG00000159314.10	ARHGAP27	chr17:45393901-45434421	Prone	Prot	OK	21.144	39.6218	0.906048	2.48739	5e-05	0.00034525	yes
ENSG00000159335.14	ENSG00000159335.14	PTMS	chr12:6747995-6770952	Prone	Prot	OK	50.7493	75.8855	0.580435	2.61034	5e-05	0.00034525	yes
ENSG00000159388.5	ENSG00000159388.5	BTG2	chr1:203305490-203309602	Prone	Prot	OK	31.7788	50.7403	0.675067	3.83109	5e-05	0.00034525	yes
ENSG00000159399.8	ENSG00000159399.8	HK2	chr2:74832654-74893359	Prone	Prot	OK	2.95508	0.843126	-1.80938	-2.91536	5e-05	0.00034525	yes
ENSG00000159423.15	ENSG00000159423.15	ALDH4A1	chr1:18839598-18956686	Prone	Prot	OK	5.41552	8.85891	0.71003	1.92448	5e-05	0.00034525	yes
ENSG00000159479.15	ENSG00000159479.15	MED8	chr1:43383916-43389808	Prone	Prot	OK	12.9692	10.7829	-0.266342	-1.15772	5e-05	0.00034525	yes
ENSG00000159640.13	ENSG00000159640.13	ACE	chr17:63477060-63521848	Prone	Prot	OK	38.498	24.8503	-0.631523	-2.41132	5e-05	0.00034525	yes
ENSG00000159658.9	ENSG00000159658.9	EFCAB14	chr1:46674035-46719064	Prone	Prot	OK	22.1301	33.866	0.613825	2.25061	5e-05	0.00034525	yes
ENSG00000159720.10	ENSG00000159720.10	ATP6V0D1	chr16:67438013-67481237	Prone	Prot	OK	47.5343	60.0503	0.337201	1.7425	5e-05	0.00034525	yes
ENSG00000159842.13	ENSG00000159842.13	ABR	chr17:997116-1229021	Prone	Prot	OK	23.4603	30.8561	0.395334	0.990293	5e-05	0.00034525	yes
ENSG00000159871.13	ENSG00000159871.13	LYPD5	chr19:43795928-43827206	Prone	Prot	OK	0.102987	1.49276	3.85744	0.684417	5e-05	0.00034525	yes
ENSG00000159899.13	ENSG00000159899.13	NPR2	chr9:35792153-35812272	Prone	Prot	OK	3.36501	1.98814	-0.759193	-1.28779	5e-05	0.00034525	yes
ENSG00000160111.11	ENSG00000160111.11	CPAMD8	chr19:16892946-17026815	Prone	Prot	OK	1.60861	2.64759	0.718862	0.797468	5e-05	0.00034525	yes
ENSG00000160211.14	ENSG00000160211.14	G6PD	chrX:154531390-154565046	Prone	Prot	OK	32.4995	47.9635	0.561516	2.56577	5e-05	0.00034525	yes
ENSG00000160213.5	ENSG00000160213.5	CSTB	chr21:43772511-43776445	Prone	Prot	OK	17.1842	21.8309	0.345289	1.48699	5e-05	0.00034525	yes
ENSG00000160271.13	ENSG00000160271.13	RALGDS	chr9:133097719-133149334	Prone	Prot	OK	22.0891	15.7454	-0.488408	-1.72234	5e-05	0.00034525	yes
ENSG00000160285.13	ENSG00000160285.13	LSS	chr21:46185078-46228824	Prone	Prot	OK	17.6964	26.6172	0.588902	2.066	5e-05	0.00034525	yes
ENSG00000160326.12	ENSG00000160326.12	SLC2A6	chr9:133471094-133479137	Prone	Prot	OK	9.26398	13.2495	0.51623	1.69219	5e-05	0.00034525	yes
ENSG00000160447.6	ENSG00000160447.6	PKN3	chr9:128702522-128724127	Prone	Prot	OK	13.3722	19.1755	0.520026	1.59593	5e-05	0.00034525	yes
ENSG00000160752.13	ENSG00000160752.13	FDPS	chr1:155308747-155331114	Prone	Prot	OK	99.143	117.23	0.24176	1.16325	5e-05	0.00034525	yes
ENSG00000160767.19	ENSG00000160767.19	FAM189B	chr1:155247204-155255483	Prone	Prot	OK	4.43416	6.38702	0.526481	1.46324	5e-05	0.00034525	yes
ENSG00000160789.18	ENSG00000160789.18	LMNA	chr1:156082572-156140089	Prone	Prot	OK	157.162	396.285	1.33428	5.3433	5e-05	0.00034525	yes
ENSG00000160888.6	ENSG00000160888.6	IER2	chr19:13150414-13154908	Prone	Prot	OK	10.0175	15.655	0.644094	2.20174	5e-05	0.00034525	yes
ENSG00000160949.15	ENSG00000160949.15	TONSL	chr8:144428774-144444444	Prone	Prot	OK	1.6208	2.28268	0.494023	1.48233	5e-05	0.00034525	yes
ENSG00000161714.10	ENSG00000161714.10	PLCD3	chr17:45023339-45144181	Prone	Prot	OK	10.9599	32.4889	1.56772	2.10029	5e-05	0.00034525	yes
ENSG00000161798.6	ENSG00000161798.6	AQP5	chr12:49950740-49965681	Prone	Prot	OK	1.00624	2.1677	1.10718	1.6965	5e-05	0.00034525	yes
ENSG00000161835.9	ENSG00000161835.9	GRASP	chr12:52006939-52015889	Prone	Prot	OK	35.4442	48.3889	0.449127	1.96359	5e-05	0.00034525	yes
ENSG00000161904.10	ENSG00000161904.10	LEMD2	chr6:33771201-33789136	Prone	Prot	OK	30.5071	24.1694	-0.335965	-1.28506	5e-05	0.00034525	yes
ENSG00000162063.11	ENSG00000162063.11	CCNF	chr16:2429393-2459979	Prone	Prot	OK	4.11264	5.28333	0.361382	1.32166	5e-05	0.00034525	yes
ENSG00000162066.13	ENSG00000162066.13	AMDHD2	chr16:2475117-2531422	Prone	Prot	OK	24.8689	38.0407	0.613204	1.54688	5e-05	0.00034525	yes
ENSG00000162231.12	ENSG00000162231.12	NXF1	chr11:62792122-62806302	Prone	Prot	OK	12.5864	17.5093	0.476251	1.14535	5e-05	0.00034525	yes
ENSG00000162302.11	ENSG00000162302.11	RPS6KA4	chr11:64359147-64372215	Prone	Prot	OK	14.3399	21.2589	0.568031	1.93401	5e-05	0.00034525	yes
ENSG00000162407.8	ENSG00000162407.8	PPAP2B	chr1:56494746-56645301	Prone	Prot	OK	23.291	60.5232	1.37771	8.22968	5e-05	0.00034525	yes
ENSG00000162430.15	ENSG00000162430.15	SEPN1	chr1:25800175-25859458	Prone	Prot	OK	28.4892	44.5201	0.644043	3.56605	5e-05	0.00034525	yes
ENSG00000162433.13	ENSG00000162433.13	AK4	chr1:65147548-65232145	Prone	Prot	OK	11.5003	3.14967	-1.8684	-5.59045	5e-05	0.00034525	yes
ENSG00000162520.13	ENSG00000162520.13	SYNC	chr1:32651141-32703596	Prone	Prot	OK	6.73603	11.892	0.820027	2.27878	5e-05	0.00034525	yes
ENSG00000162522.9	ENSG00000162522.9	KIAA1522	chr1:32741884-32774970	Prone	Prot	OK	2.64118	7.17109	1.44101	4.60008	5e-05	0.00034525	yes
ENSG00000162591.14	ENSG00000162591.14	MEGF6	chr1:3489919-3611495	Prone	Prot	OK	31.5588	20.4983	-0.622542	-1.84523	5e-05	0.00034525	yes
ENSG00000162616.8	ENSG00000162616.8	DNAJB4	chr1:77979174-78138449	Prone	Prot	OK	54.4704	68.5085	0.330811	1.70441	5e-05	0.00034525	yes
ENSG00000162618.11	ENSG00000162618.11	ELTD1	chr1:78889763-79006718	Prone	Prot	OK	79.6353	58.6663	-0.440876	-1.94609	5e-05	0.00034525	yes
ENSG00000162636.14	ENSG00000162636.14	FAM102B	chr1:108560088-108644900	Prone	Prot	OK	3.27293	2.32685	-0.492204	-2.01441	5e-05	0.00034525	yes
ENSG00000162783.10	ENSG00000162783.10	IER5	chr1:181088711-181092899	Prone	Prot	OK	6.49055	12.401	0.934049	4.64382	5e-05	0.00034525	yes
ENSG00000162817.6	ENSG00000162817.6	C1orf115	chr1:220689844-220699157	Prone	Prot	OK	12.1224	20.9915	0.792134	4.40392	5e-05	0.00034525	yes
ENSG00000162909.16	ENSG00000162909.16	CAPN2	chr1:223701592-223776018	Prone	Prot	OK	135.632	209.466	0.627018	3.19433	5e-05	0.00034525	yes
ENSG00000162923.13	ENSG00000162923.13	WDR26	chr1:224385142-224740549	Prone	Prot	OK	31.685	45.6315	0.526227	2.16865	5e-05	0.00034525	yes
ENSG00000162980.15	ENSG00000162980.15	ARL5A	chr2:151788983-151828492	Prone	Prot	OK	38.4048	29.1564	-0.397477	-1.36436	5e-05	0.00034525	yes
ENSG00000162999.11	ENSG00000162999.11	DUSP19	chr2:183078558-183108519	Prone	Prot	OK	1.58651	2.18306	0.46049	1.18696	5e-05	0.00034525	yes
ENSG00000163050.15	ENSG00000163050.15	ADCK3	chr1:226897535-226987545	Prone	Prot	OK	4.72139	6.08761	0.366667	1.02159	5e-05	0.00034525	yes
ENSG00000163083.5	ENSG00000163083.5	INHBB	chr2:120346142-120351808	Prone	Prot	OK	10.2833	3.12152	-1.71998	-6.84729	5e-05	0.00034525	yes
ENSG00000163171.7	ENSG00000163171.7	CDC42EP3	chr2:37600135-37738468	Prone	Prot	OK	41.5062	27.8488	-0.575713	-2.37714	5e-05	0.00034525	yes
ENSG00000163191.5	ENSG00000163191.5	S100A11	chr1:151994530-152047907	Prone	Prot	OK	44.0031	64.1535	0.543924	2.57795	5e-05	0.00034525	yes
ENSG00000163297.15	ENSG00000163297.15	ANTXR2	chr4:79901148-80125454	Prone	Prot	OK	22.8821	16.4029	-0.480265	-1.82127	5e-05	0.00034525	yes
ENSG00000163382.10	ENSG00000163382.10	APOA1BP	chr1:156591761-156594299	Prone	Prot	OK	80.8759	119.135	0.558816	3.24962	5e-05	0.00034525	yes
ENSG00000163399.14	ENSG00000163399.14	ATP1A1	chr1:116372667-116418622	Prone	Prot	OK	78.3487	120.68	0.623204	3.41463	5e-05	0.00034525	yes
ENSG00000163479.12	ENSG00000163479.12	SSR2	chr1:156009047-156020959	Prone	Prot	OK	150.269	131.8	-0.189202	-1.16836	5e-05	0.00034525	yes
ENSG00000163565.17	ENSG00000163565.17	IFI16	chr1:158999967-159055155	Prone	Prot	OK	61.4798	81.9134	0.413988	1.84073	5e-05	0.00034525	yes
ENSG00000163659.11	ENSG00000163659.11	TIPARP	chr3:156671861-156706770	Prone	Prot	OK	13.5018	16.0647	0.250739	1.29442	5e-05	0.00034525	yes
ENSG00000163661.3	ENSG00000163661.3	PTX3	chr3:157175222-157533619	Prone	Prot	OK	39.0592	30.3029	-0.366207	-1.19897	5e-05	0.00034525	yes
ENSG00000163682.14	ENSG00000163682.14	RPL9	chr4:39454123-39458948	Prone	Prot	OK	774.144	676.664	-0.194163	-1.20542	5e-05	0.00034525	yes
ENSG00000163703.16	ENSG00000163703.16	CRELD1	chr3:9933821-9945413	Prone	Prot	OK	18.8178	14.8345	-0.34314	-1.24457	5e-05	0.00034525	yes
ENSG00000163739.4	ENSG00000163739.4	CXCL1	chr4:73869392-73871242	Prone	Prot	OK	2.95989	1.49615	-0.984289	-1.69317	5e-05	0.00034525	yes
ENSG00000163751.3	ENSG00000163751.3	CPA3	chr3:148791101-148960112	Prone	Prot	OK	6.04709	3.49932	-0.789165	-1.72661	5e-05	0.00034525	yes
ENSG00000163762.5	ENSG00000163762.5	TM4SF18	chr3:149229355-149334414	Prone	Prot	OK	88.8711	116.237	0.387284	1.46563	5e-05	0.00034525	yes
ENSG00000163788.12	ENSG00000163788.12	SNRK	chr3:43286511-43734371	Prone	Prot	OK	67.4778	43.9934	-0.617125	-2.69617	5e-05	0.00034525	yes
ENSG00000163840.8	ENSG00000163840.8	DTX3L	chr3:122527923-122575203	Prone	Prot	OK	6.76492	10.0875	0.576426	2.62483	5e-05	0.00034525	yes
ENSG00000163884.3	ENSG00000163884.3	KLF15	chr3:126342634-126357442	Prone	Prot	OK	2.7558	1.54028	-0.839282	-1.82636	5e-05	0.00034525	yes
ENSG00000163947.10	ENSG00000163947.10	ARHGEF3	chr3:56727417-57080101	Prone	Prot	OK	7.40466	10.7263	0.534643	1.785	5e-05	0.00034525	yes
ENSG00000164048.12	ENSG00000164048.12	ZNF589	chr3:48241099-48301685	Prone	Prot	OK	2.34203	3.93708	0.74937	1.72412	5e-05	0.00034525	yes
ENSG00000164054.14	ENSG00000164054.14	SHISA5	chr3:48467797-48504826	Prone	Prot	OK	63.4674	72.216	0.186304	1.06036	5e-05	0.00034525	yes
ENSG00000164070.10	ENSG00000164070.10	HSPA4L	chr4:127781820-127844040	Prone	Prot	OK	3.51407	4.59405	0.386623	1.12347	5e-05	0.00034525	yes
ENSG00000164086.9	ENSG00000164086.9	DUSP7	chr3:52048918-52056550	Prone	Prot	OK	4.04858	5.2689	0.380086	1.45783	5e-05	0.00034525	yes
ENSG00000164087.6	ENSG00000164087.6	POC1A	chr3:52075252-52154690	Prone	Prot	OK	1.34518	1.9227	0.515336	1.17164	5e-05	0.00034525	yes
ENSG00000164096.12	ENSG00000164096.12	C4orf3	chr4:119296418-119304445	Prone	Prot	OK	51.1138	38.798	-0.397731	-1.35578	5e-05	0.00034525	yes
ENSG00000164136.15	ENSG00000164136.15	IL15	chr4:141636598-141733987	Prone	Prot	OK	1.87948	3.30012	0.812182	1.34448	5e-05	0.00034525	yes
ENSG00000164161.8	ENSG00000164161.8	HHIP	chr4:144642921-144745271	Prone	Prot	OK	85.3121	54.052	-0.658403	-1.92407	5e-05	0.00034525	yes
ENSG00000164171.9	ENSG00000164171.9	ITGA2	chr5:52675192-53094779	Prone	Prot	OK	30.9765	19.1798	-0.69159	-3.8587	5e-05	0.00034525	yes
ENSG00000164176.11	ENSG00000164176.11	EDIL3	chr5:83940553-84490765	Prone	Prot	OK	12.0856	14.1416	0.226653	1.20497	5e-05	0.00034525	yes
ENSG00000164211.11	ENSG00000164211.11	STARD4	chr5:111496032-112017309	Prone	Prot	OK	34.4883	45.8331	0.410285	1.20437	5e-05	0.00034525	yes
ENSG00000164236.10	ENSG00000164236.10	ANKRD33B	chr5:10564329-10657816	Prone	Prot	OK	1.06158	3.30344	1.63776	5.71753	5e-05	0.00034525	yes
ENSG00000164244.19	ENSG00000164244.19	PRRC1	chr5:127517608-127555089	Prone	Prot	OK	16.9816	12.969	-0.388905	-1.89258	5e-05	0.00034525	yes
ENSG00000164251.4	ENSG00000164251.4	F2RL1	chr5:76818932-76835315	Prone	Prot	OK	19.081	8.60014	-1.1497	-3.41871	5e-05	0.00034525	yes
ENSG00000164283.11	ENSG00000164283.11	ESM1	chr5:54977863-55042844	Prone	Prot	OK	90.7071	15.9173	-2.51062	-13.4666	5e-05	0.00034525	yes
ENSG00000164294.12	ENSG00000164294.12	GPX8	chr5:55112994-55173175	Prone	Prot	OK	52.3452	37.2254	-0.491769	-2.11704	5e-05	0.00034525	yes
ENSG00000164442.9	ENSG00000164442.9	CITED2	chr6:139371806-139374620	Prone	Prot	OK	13.2738	8.78046	-0.596212	-1.98238	5e-05	0.00034525	yes
ENSG00000164512.16	ENSG00000164512.16	ANKRD55	chr5:56099677-56233359	Prone	Prot	OK	0.676469	1.21582	0.845833	0.8243	5e-05	0.00034525	yes
ENSG00000164530.12	ENSG00000164530.12	PI16	chr6:36948262-36964837	Prone	Prot	OK	0.313334	3.55381	3.5036	2.43089	5e-05	0.00034525	yes
ENSG00000164543.5	ENSG00000164543.5	STK17A	chr7:43582757-43729717	Prone	Prot	OK	26.0995	18.2016	-0.519956	-1.74612	5e-05	0.00034525	yes
ENSG00000164619.7	ENSG00000164619.7	BMPER	chr7:33904910-34155872	Prone	Prot	OK	0.227913	2.16318	3.2466	1.17193	5e-05	0.00034525	yes
ENSG00000164649.18	ENSG00000164649.18	CDCA7L	chr7:21543214-21946084	Prone	Prot	OK	36.7244	24.0141	-0.612859	-2.18105	5e-05	0.00034525	yes
ENSG00000164684.12	ENSG00000164684.12	ZNF704	chr8:80628450-80874781	Prone	Prot	OK	15.2247	5.41831	-1.49049	-2.62334	5e-05	0.00034525	yes
ENSG00000164687.9	ENSG00000164687.9	FABP5	chr8:81279870-81284777	Prone	Prot	OK	295.909	212.081	-0.48054	-2.98359	5e-05	0.00034525	yes
ENSG00000164713.8	ENSG00000164713.8	BRI3	chr7:98252378-98401068	Prone	Prot	OK	157.407	194.393	0.304479	1.71804	5e-05	0.00034525	yes
ENSG00000164736.5	ENSG00000164736.5	SOX17	chr8:54457934-54460888	Prone	Prot	OK	22.9689	36.6539	0.674284	3.58701	5e-05	0.00034525	yes
ENSG00000164823.8	ENSG00000164823.8	OSGIN2	chr8:89901858-89927888	Prone	Prot	OK	13.8445	9.70496	-0.512519	-1.85608	5e-05	0.00034525	yes
ENSG00000164828.16	ENSG00000164828.16	SUN1	chr7:816614-896436	Prone	Prot	OK	61.6465	94.0146	0.608866	2.07674	5e-05	0.00034525	yes
ENSG00000164850.13	ENSG00000164850.13	GPER1	chr7:996985-1138260	Prone	Prot	OK	1.31505	4.14186	1.65516	1.62334	5e-05	0.00034525	yes
ENSG00000164867.9	ENSG00000164867.9	NOS3	chr7:150990994-151024499	Prone	Prot	OK	26.7754	66.8301	1.31959	4.24393	5e-05	0.00034525	yes
ENSG00000164880.14	ENSG00000164880.14	INTS1	chr7:1470276-1504367	Prone	Prot	OK	18.1516	22.3531	0.300379	1.154	5e-05	0.00034525	yes
ENSG00000164930.10	ENSG00000164930.10	FZD6	chr8:103121031-103332866	Prone	Prot	OK	28.6608	22.657	-0.339121	-1.99845	5e-05	0.00034525	yes
ENSG00000164932.11	ENSG00000164932.11	CTHRC1	chr8:103371514-103382997	Prone	Prot	OK	46.9584	20.0358	-1.2288	-6.00005	5e-05	0.00034525	yes
ENSG00000164976.8	ENSG00000164976.8	KIAA1161	chr9:34366669-34376853	Prone	Prot	OK	1.57074	4.40453	1.48754	3.41495	5e-05	0.00034525	yes
ENSG00000164983.7	ENSG00000164983.7	TMEM65	chr8:124306188-124372692	Prone	Prot	OK	10.3002	7.39824	-0.477424	-2.78066	5e-05	0.00034525	yes
ENSG00000165071.13	ENSG00000165071.13	TMEM71	chr8:132685006-132760712	Prone	Prot	OK	2.0042	1.0625	-0.915568	-0.938086	5e-05	0.00034525	yes
ENSG00000165072.9	ENSG00000165072.9	MAMDC2	chr9:70033920-70258866	Prone	Prot	OK	3.82142	5.07975	0.410648	1.42987	5e-05	0.00034525	yes
ENSG00000165092.11	ENSG00000165092.11	ALDH1A1	chr9:72900661-73080442	Prone	Prot	OK	92.5389	51.0358	-0.858552	-4.95534	5e-05	0.00034525	yes
ENSG00000165118.13	ENSG00000165118.13	C9orf64	chr9:83938310-83956986	Prone	Prot	OK	4.73803	3.31338	-0.515984	-1.79673	5e-05	0.00034525	yes
ENSG00000165152.7	ENSG00000165152.7	TMEM246	chr9:101468438-101533537	Prone	Prot	OK	5.56312	4.3684	-0.34879	-1.44836	5e-05	0.00034525	yes
ENSG00000165233.16	ENSG00000165233.16	C9orf89	chr9:93096217-93113283	Prone	Prot	OK	40.2824	28.4248	-0.503001	-1.94748	5e-05	0.00034525	yes
ENSG00000165240.16	ENSG00000165240.16	ATP7A	chrX:77910655-78050395	Prone	Prot	OK	4.66242	3.57937	-0.381371	-1.90319	5e-05	0.00034525	yes
ENSG00000165244.6	ENSG00000165244.6	ZNF367	chr9:96385940-96418329	Prone	Prot	OK	0.688302	1.35986	0.982342	2.23906	5e-05	0.00034525	yes
ENSG00000165269.11	ENSG00000165269.11	AQP7	chr9:33383178-33402682	Prone	Prot	OK	0.883964	1.67518	0.922253	0.696199	5e-05	0.00034525	yes
ENSG00000165272.13	ENSG00000165272.13	AQP3	chr9:33441153-33447611	Prone	Prot	OK	0.465063	10.249	4.46191	4.83963	5e-05	0.00034525	yes
ENSG00000165424.6	ENSG00000165424.6	ZCCHC24	chr10:79382324-79445627	Prone	Prot	OK	4.78183	10.9587	1.19644	5.69825	5e-05	0.00034525	yes
ENSG00000165434.7	ENSG00000165434.7	PGM2L1	chr11:74330317-74486051	Prone	Prot	OK	17.9762	12.7021	-0.501016	-2.14899	5e-05	0.00034525	yes
ENSG00000165475.12	ENSG00000165475.12	CRYL1	chr13:20403666-20525857	Prone	Prot	OK	17.1421	13.0269	-0.396051	-1.7848	5e-05	0.00034525	yes
ENSG00000165476.11	ENSG00000165476.11	REEP3	chr10:63521362-63625123	Prone	Prot	OK	22.0817	25.2219	0.191827	1.18359	5e-05	0.00034525	yes
ENSG00000165506.13	ENSG00000165506.13	DNAAF2	chr14:49625173-49635230	Prone	Prot	OK	5.39684	4.35442	-0.309634	-1.19488	5e-05	0.00034525	yes
ENSG00000165507.8	ENSG00000165507.8	C10orf10	chr10:44811023-44995891	Prone	Prot	OK	477.127	344.171	-0.471247	-2.69373	5e-05	0.00034525	yes
ENSG00000165512.4	ENSG00000165512.4	ZNF22	chr10:44997697-45181427	Prone	Prot	OK	19.7984	14.3901	-0.460305	-2.0265	5e-05	0.00034525	yes
ENSG00000165629.18	ENSG00000165629.18	ATP5C1	chr10:7788128-7807815	Prone	Prot	OK	99.8183	84.8841	-0.233809	-1.19199	5e-05	0.00034525	yes
ENSG00000165637.12	ENSG00000165637.12	VDAC2	chr10:75210153-75231448	Prone	Prot	OK	57.3425	47.8067	-0.262391	-1.51303	5e-05	0.00034525	yes
ENSG00000165655.15	ENSG00000165655.15	ZNF503	chr10:75269818-75411842	Prone	Prot	OK	0.686047	1.36807	0.995767	1.51205	5e-05	0.00034525	yes
ENSG00000165733.7	ENSG00000165733.7	BMS1	chr10:42782800-42834937	Prone	Prot	OK	6.83808	5.69946	-0.262766	-1.49415	5e-05	0.00034525	yes
ENSG00000165757.8	ENSG00000165757.8	KIAA1462	chr10:30012799-30115494	Prone	Prot	OK	21.0008	17.6214	-0.253117	-1.48901	5e-05	0.00034525	yes
ENSG00000165775.16	ENSG00000165775.16	FUNDC2	chrX:154835787-155060303	Prone	Prot	OK	38.007	29.7228	-0.354696	-1.37417	5e-05	0.00034525	yes
ENSG00000165804.14	ENSG00000165804.14	ZNF219	chr14:21016762-21104722	Prone	Prot	OK	7.794	11.3768	0.545653	1.31411	5e-05	0.00034525	yes
ENSG00000165915.12	ENSG00000165915.12	SLC39A13	chr11:47383147-47416501	Prone	Prot	OK	33.5745	26.1841	-0.358678	-1.45982	5e-05	0.00034525	yes
ENSG00000165943.4	ENSG00000165943.4	MOAP1	chr14:93182195-93184928	Prone	Prot	OK	13.6351	11.0405	-0.304521	-1.4688	5e-05	0.00034525	yes
ENSG00000165949.11	ENSG00000165949.11	IFI27	chr14:94104835-94116698	Prone	Prot	OK	263.952	450.894	0.772513	4.29412	5e-05	0.00034525	yes
ENSG00000165959.10	ENSG00000165959.10	CLMN	chr14:95181939-95319906	Prone	Prot	OK	1.72749	0.898929	-0.942394	-0.833579	5e-05	0.00034525	yes
ENSG00000165983.13	ENSG00000165983.13	PTER	chr10:16436942-16522005	Prone	Prot	OK	2.83942	1.76204	-0.688353	-1.46744	5e-05	0.00034525	yes
ENSG00000165997.4	ENSG00000165997.4	ARL5B	chr10:18659404-18681639	Prone	Prot	OK	12.2771	9.6159	-0.35248	-2.08746	5e-05	0.00034525	yes
ENSG00000166025.16	ENSG00000166025.16	AMOTL1	chr11:94543839-94925521	Prone	Prot	OK	9.06079	12.7474	0.492492	2.22466	5e-05	0.00034525	yes
ENSG00000166033.10	ENSG00000166033.10	HTRA1	chr10:122461524-122514908	Prone	Prot	OK	134.983	154.738	0.197049	1.23161	5e-05	0.00034525	yes
ENSG00000166068.11	ENSG00000166068.11	SPRED1	chr15:38252325-38357249	Prone	Prot	OK	9.5507	7.65423	-0.31935	-1.38655	5e-05	0.00034525	yes
ENSG00000166128.11	ENSG00000166128.11	RAB8B	chr15:63189468-63267782	Prone	Prot	OK	28.3912	22.1467	-0.35835	-2.15681	5e-05	0.00034525	yes
ENSG00000166147.12	ENSG00000166147.12	FBN1	chr15:48408305-48645849	Prone	Prot	OK	50.5712	70.2457	0.474095	2.32067	5e-05	0.00034525	yes
ENSG00000166226.11	ENSG00000166226.11	CCT2	chr12:69585333-69601570	Prone	Prot	OK	72.5344	61.1892	-0.245388	-1.28768	5e-05	0.00034525	yes
ENSG00000166265.10	ENSG00000166265.10	CYYR1	chr21:26378551-26573284	Prone	Prot	OK	6.90946	15.0528	1.12339	3.19934	5e-05	0.00034525	yes
ENSG00000166272.15	ENSG00000166272.15	WBP1L	chr10:102743969-102816267	Prone	Prot	OK	19.347	22.3231	0.206432	1.23759	5e-05	0.00034525	yes
ENSG00000166289.5	ENSG00000166289.5	PLEKHF1	chr19:29665055-29675457	Prone	Prot	OK	3.38212	7.94758	1.23259	3.15575	5e-05	0.00034525	yes
ENSG00000166341.7	ENSG00000166341.7	DCHS1	chr11:6621322-6655854	Prone	Prot	OK	18.3832	12.7047	-0.533025	-3.26957	5e-05	0.00034525	yes
ENSG00000166444.16	ENSG00000166444.16	ST5	chr11:8682410-8910951	Prone	Prot	OK	3.2769	2.00077	-0.711778	-0.235047	5e-05	0.00034525	yes
ENSG00000166532.14	ENSG00000166532.14	RIMKLB	chr12:8681599-8887001	Prone	Prot	OK	57.855	37.5827	-0.622375	-2.82146	5e-05	0.00034525	yes
ENSG00000166557.11	ENSG00000166557.11	TMED3	chr15:79311061-79427432	Prone	Prot	OK	73.4018	61.2113	-0.262018	-1.43237	5e-05	0.00034525	yes
ENSG00000166562.7	ENSG00000166562.7	SEC11C	chr18:59139476-59158836	Prone	Prot	OK	10.4061	16.4311	0.658992	1.74589	5e-05	0.00034525	yes
ENSG00000166619.11	ENSG00000166619.11	BLCAP	chr20:37492471-37527931	Prone	Prot	OK	53.6029	39.8935	-0.426155	-2.1377	5e-05	0.00034525	yes
ENSG00000166780.9	ENSG00000166780.9	C16orf45	chr16:15395753-15643166	Prone	Prot	OK	11.3674	16.6978	0.554758	1.2815	5e-05	0.00034525	yes
ENSG00000166825.12	ENSG00000166825.12	ANPEP	chr15:89784888-89815401	Prone	Prot	OK	30.3124	63.6676	1.07065	4.32086	5e-05	0.00034525	yes
ENSG00000166888.9	ENSG00000166888.9	STAT6	chr12:57088893-57213351	Prone	Prot	OK	47.7793	63.0628	0.400403	1.58812	5e-05	0.00034525	yes
ENSG00000166946.12	ENSG00000166946.12	CCNDBP1	chr15:43106224-43221283	Prone	Prot	OK	32.7761	26.8188	-0.289399	-1.21485	5e-05	0.00034525	yes
ENSG00000166979.11	ENSG00000166979.11	EVA1C	chr21:32412005-32515397	Prone	Prot	OK	11.8691	16.9883	0.517332	1.56999	5e-05	0.00034525	yes
ENSG00000167077.11	ENSG00000167077.11	MEI1	chr22:41699498-41799456	Prone	Prot	OK	0.593933	1.63884	1.4643	0.795854	5e-05	0.00034525	yes
ENSG00000167110.15	ENSG00000167110.15	GOLGA2	chr9:128255828-128288990	Prone	Prot	OK	35.304	27.6563	-0.352225	-1.12042	5e-05	0.00034525	yes
ENSG00000167114.11	ENSG00000167114.11	SLC27A4	chr9:128340645-128361470	Prone	Prot	OK	11.8144	16.6723	0.49691	2.33565	5e-05	0.00034525	yes
ENSG00000167193.7	ENSG00000167193.7	CRK	chr17:1420688-1463162	Prone	Prot	OK	37.302	44.2139	0.245245	1.47934	5e-05	0.00034525	yes
ENSG00000167291.14	ENSG00000167291.14	TBC1D16	chr17:79932342-80035848	Prone	Prot	OK	19.7181	13.6041	-0.535482	-1.51506	5e-05	0.00034525	yes
ENSG00000167315.16	ENSG00000167315.16	ACAA2	chr18:49782166-50195093	Prone	Prot	OK	26.1878	20.621	-0.344783	-1.22701	5e-05	0.00034525	yes
ENSG00000167468.15	ENSG00000167468.15	GPX4	chr19:1103925-1106791	Prone	Prot	OK	232.427	197.907	-0.231958	-1.39264	5e-05	0.00034525	yes
ENSG00000167508.9	ENSG00000167508.9	MVD	chr16:88651934-88663161	Prone	Prot	OK	13.2469	16.9042	0.351731	1.13992	5e-05	0.00034525	yes
ENSG00000167566.15	ENSG00000167566.15	NCKAP5L	chr12:49791145-49843129	Prone	Prot	OK	10.3288	12.1097	0.22949	1.06891	5e-05	0.00034525	yes
ENSG00000167601.10	ENSG00000167601.10	AXL	chr19:41219202-41261766	Prone	Prot	OK	21.2998	12.5516	-0.762973	-4.15534	5e-05	0.00034525	yes
ENSG00000167617.2	ENSG00000167617.2	CDC42EP5	chr19:54465025-54473264	Prone	Prot	OK	162.246	97.7769	-0.730617	-2.89832	5e-05	0.00034525	yes
ENSG00000167641.9	ENSG00000167641.9	PPP1R14A	chr19:38244034-38305009	Prone	Prot	OK	0.636493	2.78246	2.12815	1.14105	5e-05	0.00034525	yes
ENSG00000167644.10	ENSG00000167644.10	C19orf33	chr19:38244034-38305009	Prone	Prot	OK	12.9122	35.2185	1.4476	3.38154	5e-05	0.00034525	yes
ENSG00000167680.14	ENSG00000167680.14	SEMA6B	chr19:4542592-4559808	Prone	Prot	OK	128.591	104.39	-0.300814	-1.75297	5e-05	0.00034525	yes
ENSG00000167772.10	ENSG00000167772.10	ANGPTL4	chr19:7958578-8489114	Prone	Prot	OK	108.892	7.55815	-3.84873	-4.16563	5e-05	0.00034525	yes
ENSG00000167775.9	ENSG00000167775.9	CD320	chr19:7958578-8489114	Prone	Prot	OK	30.472	58.0898	0.9308	1.37201	5e-05	0.00034525	yes
ENSG00000167779.6	ENSG00000167779.6	IGFBP6	chr12:53097435-53102345	Prone	Prot	OK	3.95713	6.89058	0.800173	1.58325	5e-05	0.00034525	yes
ENSG00000167785.7	ENSG00000167785.7	ZNF558	chr19:8806169-8832328	Prone	Prot	OK	3.72936	2.18075	-0.774106	-1.17848	5e-05	0.00034525	yes
ENSG00000167797.6	ENSG00000167797.6	CDK2AP2	chr11:67506496-67508649	Prone	Prot	OK	11.2718	14.1594	0.32905	1.15607	5e-05	0.00034525	yes
ENSG00000167925.14	ENSG00000167925.14	GHDC	chr17:42188798-42194532	Prone	Prot	OK	9.31777	6.5741	-0.503191	-1.51812	5e-05	0.00034525	yes
ENSG00000167962.11	ENSG00000167962.11	ZNF598	chr16:1997653-2009823	Prone	Prot	OK	12.3351	18.5199	0.586302	1.98607	5e-05	0.00034525	yes
ENSG00000167965.16	ENSG00000167965.16	MLST8	chr16:2204247-2211950	Prone	Prot	OK	10.3727	13.9561	0.428109	1.27296	5e-05	0.00034525	yes
ENSG00000167972.12	ENSG00000167972.12	ABCA3	chr16:2275880-2426699	Prone	Prot	OK	11.0125	13.824	0.328039	1.35949	5e-05	0.00034525	yes
ENSG00000167992.11	ENSG00000167992.11	VWCE	chr11:61258285-61295424	Prone	Prot	OK	3.11709	5.30933	0.768331	1.33433	5e-05	0.00034525	yes
ENSG00000167996.14	ENSG00000167996.14	FTH1	chr11:61949820-61967660	Prone	Prot	OK	959.448	1432.12	0.577873	3.06864	5e-05	0.00034525	yes
ENSG00000168003.15	ENSG00000168003.15	SLC3A2	chr11:62856101-62888875	Prone	Prot	OK	72.8127	87.7125	0.268591	1.33049	5e-05	0.00034525	yes
ENSG00000168067.10	ENSG00000168067.10	MAP4K2	chr11:64784913-64803241	Prone	Prot	OK	15.7946	20.9534	0.407752	1.48262	5e-05	0.00034525	yes
ENSG00000168077.12	ENSG00000168077.12	SCARA3	chr8:27633867-27676776	Prone	Prot	OK	28.5686	34.0121	0.251616	1.44979	5e-05	0.00034525	yes
ENSG00000168209.4	ENSG00000168209.4	DDIT4	chr10:72273919-72276036	Prone	Prot	OK	86.1172	179.071	1.05616	3.74383	5e-05	0.00034525	yes
ENSG00000168264.9	ENSG00000168264.9	IRF2BP2	chr1:234604268-234609525	Prone	Prot	OK	33.778	26.6302	-0.343023	-1.87613	5e-05	0.00034525	yes
ENSG00000168268.9	ENSG00000168268.9	NT5DC2	chr3:52495337-52770949	Prone	Prot	OK	46.5576	26.381	-0.819518	-0.993703	5e-05	0.00034525	yes
ENSG00000168309.15	ENSG00000168309.15	FAM107A	chr3:58564116-58666848	Prone	Prot	OK	4.40552	8.1936	0.895186	3.32068	5e-05	0.00034525	yes
ENSG00000168374.9	ENSG00000168374.9	ARF4	chr3:57571362-57600927	Prone	Prot	OK	115.725	89.4585	-0.371406	-2.24066	5e-05	0.00034525	yes
ENSG00000168386.17	ENSG00000168386.17	FILIP1L	chr3:99817833-100178603	Prone	Prot	OK	7.13399	12.4214	0.800047	3.12653	5e-05	0.00034525	yes
ENSG00000168394.10	ENSG00000168394.10	TAP1	chr6:32840716-32859585	Prone	Prot	OK	21.2068	27.5502	0.377535	1.45115	5e-05	0.00034525	yes
ENSG00000168404.11	ENSG00000168404.11	MLKL	chr16:74671854-74700960	Prone	Prot	OK	8.69169	11.6642	0.424377	1.42072	5e-05	0.00034525	yes
ENSG00000168405.13	ENSG00000168405.13	CMAHP	chr6:25081067-25166555	Prone	Prot	OK	2.21164	4.41153	0.996159	2.06536	5e-05	0.00034525	yes
ENSG00000168495.11	ENSG00000168495.11	POLR3D	chr8:22245103-22275162	Prone	Prot	OK	12.1271	8.12367	-0.578035	-2.48012	5e-05	0.00034525	yes
ENSG00000168610.13	ENSG00000168610.13	STAT3	chr17:42313323-42388568	Prone	Prot	OK	35.4645	43.0191	0.278602	1.33267	5e-05	0.00034525	yes
ENSG00000168615.10	ENSG00000168615.10	ADAM9	chr8:38996868-39105144	Prone	Prot	OK	63.685	51.8415	-0.296847	-1.5333	5e-05	0.00034525	yes
ENSG00000168646.11	ENSG00000168646.11	AXIN2	chr17:65528562-66192084	Prone	Prot	OK	2.9961	1.37714	-1.12141	-1.4749	5e-05	0.00034525	yes
ENSG00000168672.3	ENSG00000168672.3	FAM84B	chr8:126552441-126713415	Prone	Prot	OK	43.6393	33.4541	-0.383446	-2.05884	5e-05	0.00034525	yes
ENSG00000168785.6	ENSG00000168785.6	TSPAN5	chr4:98470366-98658629	Prone	Prot	OK	13.7252	21.0553	0.617353	2.51205	5e-05	0.00034525	yes
ENSG00000168874.11	ENSG00000168874.11	ATOH8	chr2:85751343-85788066	Prone	Prot	OK	4.06609	2.85956	-0.507849	-1.28179	5e-05	0.00034525	yes
ENSG00000168916.14	ENSG00000168916.14	ZNF608	chr5:124636912-124748807	Prone	Prot	OK	9.60813	12.8609	0.420669	1.5323	5e-05	0.00034525	yes
ENSG00000168918.12	ENSG00000168918.12	INPP5D	chr2:233059966-233207903	Prone	Prot	OK	25.3109	18.4444	-0.456571	-1.773	5e-05	0.00034525	yes
ENSG00000168994.12	ENSG00000168994.12	PXDC1	chr6:3722613-3753871	Prone	Prot	OK	57.3384	48.173	-0.251277	-1.34993	5e-05	0.00034525	yes
ENSG00000169032.8	ENSG00000169032.8	MAP2K1	chr15:66386816-66497813	Prone	Prot	OK	22.257	17.15	-0.376046	-1.31111	5e-05	0.00034525	yes
ENSG00000169129.13	ENSG00000169129.13	AFAP1L2	chr10:114294823-114404756	Prone	Prot	OK	0.971322	2.16438	1.15593	1.5488	5e-05	0.00034525	yes
ENSG00000169184.5	ENSG00000169184.5	MN1	chr22:27748276-27801498	Prone	Prot	OK	0.789694	2.48782	1.65552	2.92681	5e-05	0.00034525	yes
ENSG00000169213.6	ENSG00000169213.6	RAB3B	chr1:51907955-51990764	Prone	Prot	OK	2.17914	0.948512	-1.20002	-5.41152	5e-05	0.00034525	yes
ENSG00000169241.16	ENSG00000169241.16	SLC50A1	chr1:155135343-155138857	Prone	Prot	OK	21.3516	16.9135	-0.336169	-1.35827	5e-05	0.00034525	yes
ENSG00000169242.10	ENSG00000169242.10	EFNA1	chr1:155127459-155134857	Prone	Prot	OK	91.0722	54.0892	-0.75167	-4.1542	5e-05	0.00034525	yes
ENSG00000169247.10	ENSG00000169247.10	SH3TC2	chr5:148923638-149063163	Prone	Prot	OK	1.5076	2.83015	0.908624	1.1807	5e-05	0.00034525	yes
ENSG00000169248.11	ENSG00000169248.11	CXCL11	chr4:76011183-76112802	Prone	Prot	OK	1.26829	0.643305	-0.979307	-1.3859	5e-05	0.00034525	yes
ENSG00000169252.5	ENSG00000169252.5	ADRB2	chr5:148825244-148828687	Prone	Prot	OK	1.07965	2.99382	1.47142	4.03018	5e-05	0.00034525	yes
ENSG00000169429.9	ENSG00000169429.9	CXCL8	chr4:73740505-73743716	Prone	Prot	OK	1.63989	0.246015	-2.73678	-1.78876	5e-05	0.00034525	yes
ENSG00000169439.10	ENSG00000169439.10	SDC2	chr8:96493350-96611780	Prone	Prot	OK	2.53702	0.900767	-1.49391	-1.46206	5e-05	0.00034525	yes
ENSG00000169442.7	ENSG00000169442.7	CD52	chr1:26279175-26320523	Prone	Prot	OK	1.62907	24.6993	3.92235	2.71036	5e-05	0.00034525	yes
ENSG00000169554.15	ENSG00000169554.15	ZEB2	chr2:144384080-144524583	Prone	Prot	OK	6.59501	10.9742	0.734667	2.00746	5e-05	0.00034525	yes
ENSG00000169604.18	ENSG00000169604.18	ANTXR1	chr2:69013177-69249327	Prone	Prot	OK	7.80214	4.964	-0.652367	-1.70133	5e-05	0.00034525	yes
ENSG00000169635.8	ENSG00000169635.8	HIC2	chr22:21417403-21451463	Prone	Prot	OK	1.39657	0.986483	-0.501523	-1.38594	5e-05	0.00034525	yes
ENSG00000169641.12	ENSG00000169641.12	LUZP1	chr1:23019447-23177808	Prone	Prot	OK	14.1993	18.875	0.410659	1.45059	5e-05	0.00034525	yes
ENSG00000169682.16	ENSG00000169682.16	SPNS1	chr16:28973961-28990783	Prone	Prot	OK	34.7593	42.8544	0.302044	1.46649	5e-05	0.00034525	yes
ENSG00000169692.11	ENSG00000169692.11	AGPAT2	chr9:136673142-136687423	Prone	Prot	OK	16.8763	21.5856	0.355073	1.51912	5e-05	0.00034525	yes
ENSG00000169710.6	ENSG00000169710.6	FASN	chr17:82078337-82098332	Prone	Prot	OK	14.7656	20.8652	0.498852	1.51722	5e-05	0.00034525	yes
ENSG00000169750.7	ENSG00000169750.7	RAC3	chr17:82031623-82034204	Prone	Prot	OK	15.0866	11.9478	-0.336525	-1.17524	5e-05	0.00034525	yes
ENSG00000169756.15	ENSG00000169756.15	LIMS1	chr2:108534354-108687246	Prone	Prot	OK	82.6775	65.0075	-0.346889	-1.66821	5e-05	0.00034525	yes
ENSG00000169851.14	ENSG00000169851.14	PCDH7	chr4:30720414-31146805	Prone	Prot	OK	5.37167	9.77777	0.864133	2.44753	5e-05	0.00034525	yes
ENSG00000169926.8	ENSG00000169926.8	KLF13	chr15:31326854-31435665	Prone	Prot	OK	14.952	20.3974	0.448047	1.49742	5e-05	0.00034525	yes
ENSG00000170017.11	ENSG00000170017.11	ALCAM	chr3:105366908-105576900	Prone	Prot	OK	22.7547	28.2644	0.312823	1.82114	5e-05	0.00034525	yes
ENSG00000170365.8	ENSG00000170365.8	SMAD1	chr4:145481193-145558079	Prone	Prot	OK	26.2379	35.0974	0.419712	1.42459	5e-05	0.00034525	yes
ENSG00000170385.9	ENSG00000170385.9	SLC30A1	chr1:211571567-211578742	Prone	Prot	OK	17.3016	14.9875	-0.207152	-1.24092	5e-05	0.00034525	yes
ENSG00000170525.17	ENSG00000170525.17	PFKFB3	chr10:6144933-6235545	Prone	Prot	OK	13.9283	8.02694	-0.795093	-1.91978	5e-05	0.00034525	yes
ENSG00000170558.7	ENSG00000170558.7	CDH2	chr18:27950965-28177446	Prone	Prot	OK	3.53924	2.56151	-0.466443	-1.57327	5e-05	0.00034525	yes
ENSG00000170681.6	ENSG00000170681.6	MURC	chr9:100578078-100587906	Prone	Prot	OK	1.13651	0.638486	-0.831884	-1.76945	5e-05	0.00034525	yes
ENSG00000170776.18	ENSG00000170776.18	AKAP13	chr15:85380570-85750281	Prone	Prot	OK	23.3639	35.1777	0.590376	1.39129	5e-05	0.00034525	yes
ENSG00000170801.8	ENSG00000170801.8	HTRA3	chr4:8269764-8307111	Prone	Prot	OK	8.64934	15.492	0.840864	3.79321	5e-05	0.00034525	yes
ENSG00000170836.10	ENSG00000170836.10	PPM1D	chr17:60600182-60666280	Prone	Prot	OK	7.26578	10.7801	0.569177	2.52936	5e-05	0.00034525	yes
ENSG00000170917.12	ENSG00000170917.12	NUDT6	chr4:122826707-122922968	Prone	Prot	OK	6.43665	11.2035	0.799569	1.58418	5e-05	0.00034525	yes
ENSG00000170955.9	ENSG00000170955.9	PRKCDBP	chr11:6318945-6320647	Prone	Prot	OK	39.532	56.9768	0.527353	2.50183	5e-05	0.00034525	yes
ENSG00000171033.11	ENSG00000171033.11	PKIA	chr8:78426102-78605267	Prone	Prot	OK	14.0454	10.3093	-0.446155	-2.01021	5e-05	0.00034525	yes
ENSG00000171105.12	ENSG00000171105.12	INSR	chr19:7112254-7294034	Prone	Prot	OK	23.4162	19.4689	-0.266338	-0.974825	5e-05	0.00034525	yes
ENSG00000171130.16	ENSG00000171130.16	ATP6V0E2	chr7:149867696-149880698	Prone	Prot	OK	9.86687	15.527	0.654115	1.61137	5e-05	0.00034525	yes
ENSG00000171148.12	ENSG00000171148.12	TADA3	chr3:9749943-9855138	Prone	Prot	OK	13.554	8.40136	-0.690027	-1.41191	5e-05	0.00034525	yes
ENSG00000171206.12	ENSG00000171206.12	TRIM8	chr10:102644495-102658407	Prone	Prot	OK	32.0816	24.2067	-0.406342	-1.9754	5e-05	0.00034525	yes
ENSG00000171223.5	ENSG00000171223.5	JUNB	chr19:12763002-12874951	Prone	Prot	OK	48.8193	31.0382	-0.653409	-1.83137	5e-05	0.00034525	yes
ENSG00000171310.9	ENSG00000171310.9	CHST11	chr12:104455294-104762014	Prone	Prot	OK	4.49601	7.10717	0.660631	1.2799	5e-05	0.00034525	yes
ENSG00000171314.8	ENSG00000171314.8	PGAM1	chr10:97426159-97433441	Prone	Prot	OK	121.071	98.6594	-0.295324	-1.84171	5e-05	0.00034525	yes
ENSG00000171388.11	ENSG00000171388.11	APLN	chrX:129645258-129654937	Prone	Prot	OK	114.946	25.4024	-2.17792	-13.0299	5e-05	0.00034525	yes
ENSG00000171408.12	ENSG00000171408.12	PDE7B	chr6:135851695-136225751	Prone	Prot	OK	10.4533	6.19434	-0.754929	-2.61112	5e-05	0.00034525	yes
ENSG00000171467.14	ENSG00000171467.14	ZNF318	chr6:43295693-43369478	Prone	Prot	OK	2.79248	3.37711	0.274242	1.07366	5e-05	0.00034525	yes
ENSG00000171488.13	ENSG00000171488.13	LRRC8C	chr1:89524835-89936611	Prone	Prot	OK	16.8042	21.4811	0.354249	1.58105	5e-05	0.00034525	yes
ENSG00000171522.5	ENSG00000171522.5	PTGER4	chr5:40679497-40693735	Prone	Prot	OK	4.01733	7.07928	0.817366	1.90412	5e-05	0.00034525	yes
ENSG00000171552.11	ENSG00000171552.11	BCL2L1	chr20:31664451-31723989	Prone	Prot	OK	11.7096	17.3522	0.567426	2.3463	5e-05	0.00034525	yes
ENSG00000171604.10	ENSG00000171604.10	CXXC5	chr5:139647298-139683882	Prone	Prot	OK	3.40007	7.51087	1.14342	1.89788	5e-05	0.00034525	yes
ENSG00000171621.12	ENSG00000171621.12	SPSB1	chr1:9292879-9369532	Prone	Prot	OK	20.2836	26.6691	0.394853	1.87049	5e-05	0.00034525	yes
ENSG00000171658.7	ENSG00000171658.7	RP11-443P15.2	chr3:185959942-185980872	Prone	Prot	OK	2.35027	3.87893	0.722834	1.18959	5e-05	0.00034525	yes
ENSG00000171680.19	ENSG00000171680.19	PLEKHG5	chr1:6424787-6520061	Prone	Prot	OK	22.9923	29.7575	0.372105	1.84296	5e-05	0.00034525	yes
ENSG00000171703.15	ENSG00000171703.15	TCEA2	chr20:64049835-64072347	Prone	Prot	OK	30.7511	22.0635	-0.47898	-1.61897	5e-05	0.00034525	yes
ENSG00000171723.14	ENSG00000171723.14	GPHN	chr14:66212809-67181803	Prone	Prot	OK	2.85798	4.62609	0.694801	0.924387	5e-05	0.00034525	yes
ENSG00000171735.17	ENSG00000171735.17	CAMTA1	chr1:6785323-7769706	Prone	Prot	OK	33.0401	25.9556	-0.348172	-1.23439	5e-05	0.00034525	yes
ENSG00000171813.12	ENSG00000171813.12	PWWP2B	chr10:132397167-132417863	Prone	Prot	OK	3.83665	6.28453	0.71196	2.31963	5e-05	0.00034525	yes
ENSG00000171867.15	ENSG00000171867.15	PRNP	chr20:4686235-4701590	Prone	Prot	OK	23.1618	18.2376	-0.344835	-1.86406	5e-05	0.00034525	yes
ENSG00000171877.18	ENSG00000171877.18	FRMD5	chr15:43870760-44195252	Prone	Prot	OK	6.87647	5.12053	-0.425376	-1.30238	5e-05	0.00034525	yes
ENSG00000171928.12	ENSG00000171928.12	TVP23B	chr17:18780994-18806714	Prone	Prot	OK	19.1647	13.4539	-0.510432	-1.99276	5e-05	0.00034525	yes
ENSG00000171992.11	ENSG00000171992.11	SYNPO	chr5:150601079-150659220	Prone	Prot	OK	25.9871	30.3015	0.221597	1.23175	5e-05	0.00034525	yes
ENSG00000172031.6	ENSG00000172031.6	EPHX4	chr1:92029981-92063536	Prone	Prot	OK	9.03286	6.58429	-0.456154	-1.64093	5e-05	0.00034525	yes
ENSG00000172071.10	ENSG00000172071.10	EIF2AK3	chr2:88538719-88631821	Prone	Prot	OK	8.53718	6.07379	-0.491162	-1.22551	5e-05	0.00034525	yes
ENSG00000172086.7	ENSG00000172086.7	KRCC1	chr2:88027204-88055791	Prone	Prot	OK	11.4706	9.05447	-0.341236	-1.60023	5e-05	0.00034525	yes
ENSG00000172331.10	ENSG00000172331.10	BPGM	chr7:134646807-134679813	Prone	Prot	OK	16.2277	10.5531	-0.620795	-2.861	5e-05	0.00034525	yes
ENSG00000172380.5	ENSG00000172380.5	GNG12	chr1:67701465-68233120	Prone	Prot	OK	91.2783	74.6194	-0.290721	-1.39613	5e-05	0.00034525	yes
ENSG00000172534.12	ENSG00000172534.12	HCFC1	chrX:153947552-153971807	Prone	Prot	OK	4.3654	5.63117	0.367323	1.15392	5e-05	0.00034525	yes
ENSG00000172572.6	ENSG00000172572.6	PDE3A	chr12:20361731-20684381	Prone	Prot	OK	18.1866	13.1698	-0.465642	-1.95176	5e-05	0.00034525	yes
ENSG00000172578.10	ENSG00000172578.10	KLHL6	chr3:183487530-183555689	Prone	Prot	OK	2.91731	2.22732	-0.389331	-1.60867	5e-05	0.00034525	yes
ENSG00000172819.15	ENSG00000172819.15	RARG	chr12:53210566-53232980	Prone	Prot	OK	3.1827	6.58434	1.04879	2.0267	5e-05	0.00034525	yes
ENSG00000172888.10	ENSG00000172888.10	ZNF621	chr3:40524877-40574685	Prone	Prot	OK	6.38052	5.14295	-0.311077	-1.13348	5e-05	0.00034525	yes
ENSG00000172889.14	ENSG00000172889.14	EGFL7	chr9:136648609-136672678	Prone	Prot	OK	366.335	318.095	-0.203703	-1.17346	5e-05	0.00034525	yes
ENSG00000172893.14	ENSG00000172893.14	DHCR7	chr11:71428192-71452868	Prone	Prot	OK	12.0514	15.1345	0.328633	1.12659	5e-05	0.00034525	yes
ENSG00000172936.11	ENSG00000172936.11	MYD88	chr3:38138477-38143022	Prone	Prot	OK	2.33423	3.56909	0.612608	1.37825	5e-05	0.00034525	yes
ENSG00000172965.13	ENSG00000172965.13	MIR4435-1HG	chr2:111195962-111637967	Prone	Prot	OK	67.5971	47.2055	-0.518007	-1.81796	5e-05	0.00034525	yes
ENSG00000172985.10	ENSG00000172985.10	SH3RF3	chr2:109129347-109504632	Prone	Prot	OK	3.7603	3.0693	-0.292936	-1.28964	5e-05	0.00034525	yes
ENSG00000173083.13	ENSG00000173083.13	HPSE	chr4:83292460-83335153	Prone	Prot	OK	15.8563	10.3821	-0.610962	-2.51293	5e-05	0.00034525	yes
ENSG00000173193.12	ENSG00000173193.12	PARP14	chr3:122680617-122730840	Prone	Prot	OK	21.4951	25.1092	0.224207	1.12039	5e-05	0.00034525	yes
ENSG00000173218.13	ENSG00000173218.13	VANGL1	chr1:115641952-115698224	Prone	Prot	OK	6.38094	10.9883	0.784127	2.43835	5e-05	0.00034525	yes
ENSG00000173269.12	ENSG00000173269.12	MMRN2	chr10:86935539-87024732	Prone	Prot	OK	135.498	196.172	0.533848	2.95592	5e-05	0.00034525	yes
ENSG00000173281.4	ENSG00000173281.4	PPP1R3B	chr8:9136254-9151574	Prone	Prot	OK	20.8248	9.79609	-1.08803	-6.29435	5e-05	0.00034525	yes
ENSG00000173327.6	ENSG00000173327.6	MAP3K11	chr11:65576037-65650930	Prone	Prot	OK	37.4202	50.2073	0.424081	1.42683	5e-05	0.00034525	yes
ENSG00000173334.3	ENSG00000173334.3	TRIB1	chr8:125430320-125438405	Prone	Prot	OK	2.19165	1.38591	-0.661188	-1.37198	5e-05	0.00034525	yes
ENSG00000173402.10	ENSG00000173402.10	DAG1	chr3:49468702-49535618	Prone	Prot	OK	17.2453	24.4923	0.506124	1.51015	5e-05	0.00034525	yes
ENSG00000173442.10	ENSG00000173442.10	EHBP1L1	chr11:65576037-65650930	Prone	Prot	OK	9.45785	16.1796	0.774588	1.44399	5e-05	0.00034525	yes
ENSG00000173456.4	ENSG00000173456.4	RNF26	chr11:119334526-119337313	Prone	Prot	OK	2.53985	3.51165	0.467407	1.38907	5e-05	0.00034525	yes
ENSG00000173530.5	ENSG00000173530.5	TNFRSF10D	chr8:23135587-23164030	Prone	Prot	OK	65.1911	26.2928	-1.31001	-8.07615	5e-05	0.00034525	yes
ENSG00000173535.12	ENSG00000173535.12	TNFRSF10C	chr8:23084354-23117437	Prone	Prot	OK	34.3806	16.9363	-1.02148	-4.86673	5e-05	0.00034525	yes
ENSG00000173548.8	ENSG00000173548.8	SNX33	chr15:75636138-75662301	Prone	Prot	OK	8.62463	6.11537	-0.496022	-1.72742	5e-05	0.00034525	yes
ENSG00000173597.7	ENSG00000173597.7	SULT1B1	chr4:69721161-69787961	Prone	Prot	OK	6.11451	12.5728	1.04	3.05579	5e-05	0.00034525	yes
ENSG00000173621.8	ENSG00000173621.8	LRFN4	chr11:66848232-66958376	Prone	Prot	OK	10.1908	14.4756	0.506365	1.58695	5e-05	0.00034525	yes
ENSG00000173706.11	ENSG00000173706.11	HEG1	chr3:124965709-125055958	Prone	Prot	OK	9.00862	24.6018	1.44939	4.67998	5e-05	0.00034525	yes
ENSG00000173801.15	ENSG00000173801.15	JUP	chr17:41754603-41786931	Prone	Prot	OK	90.4752	76.9245	-0.234078	-1.10361	5e-05	0.00034525	yes
ENSG00000173848.17	ENSG00000173848.17	NET1	chr10:5412550-5458463	Prone	Prot	OK	7.06739	11.3437	0.682644	2.15136	5e-05	0.00034525	yes
ENSG00000173868.10	ENSG00000173868.10	PHOSPHO1	chr17:49223361-49230766	Prone	Prot	OK	0.858859	2.42988	1.50039	1.64236	5e-05	0.00034525	yes
ENSG00000173894.9	ENSG00000173894.9	CBX2	chr17:79778131-79787983	Prone	Prot	OK	5.34134	7.68939	0.525668	1.43439	5e-05	0.00034525	yes
ENSG00000173926.5	ENSG00000173926.5	2016-03-03	chr5:126867713-127030808	Prone	Prot	OK	21.8939	15.1706	-0.529255	-1.59749	5e-05	0.00034525	yes
ENSG00000174004.5	ENSG00000174004.5	NRROS	chr3:196639685-196736007	Prone	Prot	OK	6.45189	9.96666	0.627388	1.86172	5e-05	0.00034525	yes
ENSG00000174059.15	ENSG00000174059.15	CD34	chr1:207880971-207911402	Prone	Prot	OK	42.637	62.5784	0.553559	2.87701	5e-05	0.00034525	yes
ENSG00000174238.13	ENSG00000174238.13	PITPNA	chr17:1516930-1562816	Prone	Prot	OK	14.8578	19.0749	0.360458	1.50688	5e-05	0.00034525	yes
ENSG00000174307.6	ENSG00000174307.6	PHLDA3	chr1:201464382-201469237	Prone	Prot	OK	13.4907	18.469	0.453141	1.26756	5e-05	0.00034525	yes
ENSG00000174640.11	ENSG00000174640.11	SLCO2A1	chr3:133932695-134052184	Prone	Prot	OK	1.73862	16.8808	3.27937	4.4988	5e-05	0.00034525	yes
ENSG00000174748.17	ENSG00000174748.17	RPL15	chr3:23891659-23980618	Prone	Prot	OK	904.372	750.217	-0.269608	-1.21801	5e-05	0.00034525	yes
ENSG00000174840.8	ENSG00000174840.8	PDE12	chr3:57556275-57566844	Prone	Prot	OK	6.25463	7.52901	0.267534	1.10951	5e-05	0.00034525	yes
ENSG00000174851.13	ENSG00000174851.13	YIF1A	chr11:66268532-66289170	Prone	Prot	OK	45.2372	34.0847	-0.408387	-1.21924	5e-05	0.00034525	yes
ENSG00000174951.9	ENSG00000174951.9	FUT1	chr19:48748010-48755390	Prone	Prot	OK	1.96704	2.81697	0.518116	1.3632	5e-05	0.00034525	yes
ENSG00000175130.6	ENSG00000175130.6	MARCKSL1	chr1:32333831-32336379	Prone	Prot	OK	105.599	142.389	0.431239	2.705	5e-05	0.00034525	yes
ENSG00000175155.7	ENSG00000175155.7	YPEL2	chr17:59331688-59403303	Prone	Prot	OK	31.1788	24.0598	-0.373944	-1.78454	5e-05	0.00034525	yes
ENSG00000175183.8	ENSG00000175183.8	CSRP2	chr12:76858714-76880352	Prone	Prot	OK	3.22659	5.78367	0.841974	1.68947	5e-05	0.00034525	yes
ENSG00000175264.6	ENSG00000175264.6	CHST1	chr11:45648876-45665622	Prone	Prot	OK	27.5298	15.2258	-0.854477	-4.15095	5e-05	0.00034525	yes
ENSG00000175265.16	ENSG00000175265.16	GOLGA8A	chr15:34379067-34437466	Prone	Prot	OK	12.6317	9.18574	-0.459581	-1.33438	5e-05	0.00034525	yes
ENSG00000175352.9	ENSG00000175352.9	NRIP3	chr11:8980575-9004049	Prone	Prot	OK	1.95882	1.19722	-0.710298	-1.09775	5e-05	0.00034525	yes
ENSG00000175455.13	ENSG00000175455.13	CCDC14	chr3:123897304-123961408	Prone	Prot	OK	10.0653	7.18477	-0.48637	-1.07402	5e-05	0.00034525	yes
ENSG00000175538.9	ENSG00000175538.9	KCNE3	chr11:74330317-74486051	Prone	Prot	OK	1.67966	0.510224	-1.71897	-0.776603	5e-05	0.00034525	yes
ENSG00000175556.15	ENSG00000175556.15	LONRF3	chrX:118974613-119018355	Prone	Prot	OK	6.67049	4.67621	-0.512455	-2.17675	5e-05	0.00034525	yes
ENSG00000175591.10	ENSG00000175591.10	P2RY2	chr11:73218297-73236352	Prone	Prot	OK	0.450945	1.02295	1.18171	1.55264	5e-05	0.00034525	yes
ENSG00000175602.3	ENSG00000175602.3	CCDC85B	chr11:65890111-65891635	Prone	Prot	OK	29.93	42.7701	0.515008	2.49871	5e-05	0.00034525	yes
ENSG00000175662.16	ENSG00000175662.16	TOM1L2	chr17:17843510-17972422	Prone	Prot	OK	6.78598	9.36218	0.464286	1.28454	5e-05	0.00034525	yes
ENSG00000175746.6	ENSG00000175746.6	C15orf54	chr15:38865321-39427195	Prone	Prot	OK	5.44355	1.35629	-2.00488	-5.76831	5e-05	0.00034525	yes
ENSG00000175832.11	ENSG00000175832.11	ETV4	chr17:43483864-43610338	Prone	Prot	OK	4.92711	1.74096	-1.50086	-1.5436	5e-05	0.00034525	yes
ENSG00000175899.13	ENSG00000175899.13	A2M	chr12:9065176-9116229	Prone	Prot	OK	12.9846	21.8432	0.75038	2.44113	5e-05	0.00034525	yes
ENSG00000175906.4	ENSG00000175906.4	ARL4D	chr17:43398958-43401137	Prone	Prot	OK	1.54955	5.55341	1.84153	4.23269	5e-05	0.00034525	yes
ENSG00000176018.11	ENSG00000176018.11	LYSMD3	chr5:90515610-91164221	Prone	Prot	OK	11.7159	9.52475	-0.298717	-1.55922	5e-05	0.00034525	yes
ENSG00000176142.11	ENSG00000176142.11	TMEM39A	chr3:119429499-119468830	Prone	Prot	OK	23.3471	16.5855	-0.493322	-1.3629	5e-05	0.00034525	yes
ENSG00000176170.12	ENSG00000176170.12	SPHK1	chr17:76309485-76387860	Prone	Prot	OK	91.8738	62.1419	-0.564088	-2.4368	5e-05	0.00034525	yes
ENSG00000176171.10	ENSG00000176171.10	BNIP3	chr10:131966454-131981931	Prone	Prot	OK	29.0887	13.496	-1.10793	-6.24743	5e-05	0.00034525	yes
ENSG00000176393.9	ENSG00000176393.9	RNPEP	chr1:201982371-202017188	Prone	Prot	OK	24.5735	29.7201	0.274334	1.39862	5e-05	0.00034525	yes
ENSG00000176435.6	ENSG00000176435.6	CLEC14A	chr14:38254102-38256369	Prone	Prot	OK	255.658	310.34	0.279631	1.78179	5e-05	0.00034525	yes
ENSG00000176438.11	ENSG00000176438.11	SYNE3	chr14:95407265-95475836	Prone	Prot	OK	5.63611	15.4796	1.4576	6.15264	5e-05	0.00034525	yes
ENSG00000176454.12	ENSG00000176454.12	LPCAT4	chr15:34358617-34367278	Prone	Prot	OK	10.8026	21.2371	0.975208	3.16888	5e-05	0.00034525	yes
ENSG00000176624.10	ENSG00000176624.10	MEX3C	chr18:51174549-51218304	Prone	Prot	OK	20.4235	16.3255	-0.323103	-1.81327	5e-05	0.00034525	yes
ENSG00000176641.9	ENSG00000176641.9	RNF152	chr18:61808062-61894247	Prone	Prot	OK	14.6092	8.79263	-0.732515	-1.62858	5e-05	0.00034525	yes
ENSG00000176788.8	ENSG00000176788.8	BASP1	chr5:17065597-17276843	Prone	Prot	OK	11.2108	7.89168	-0.506481	-1.95345	5e-05	0.00034525	yes
ENSG00000176907.4	ENSG00000176907.4	C8orf4	chr8:40153454-40155308	Prone	Prot	OK	6.88461	16.0093	1.21746	5.56971	5e-05	0.00034525	yes
ENSG00000177076.5	ENSG00000177076.5	ACER2	chr9:19409058-19452020	Prone	Prot	OK	9.95417	3.39232	-1.55303	-5.89474	5e-05	0.00034525	yes
ENSG00000177105.9	ENSG00000177105.9	RHOG	chr11:3826977-3840983	Prone	Prot	OK	18.8282	22.5396	0.259561	1.16577	5e-05	0.00034525	yes
ENSG00000177119.14	ENSG00000177119.14	ANO6	chr12:45173063-45440404	Prone	Prot	OK	57.0754	44.5757	-0.356613	-1.9845	5e-05	0.00034525	yes
ENSG00000177169.8	ENSG00000177169.8	ULK1	chr12:131894650-131923167	Prone	Prot	OK	5.85219	9.32115	0.671531	1.81834	5e-05	0.00034525	yes
ENSG00000177191.2	ENSG00000177191.2	B3GNT8	chr19:41262495-41440717	Prone	Prot	OK	20.6046	59.0763	1.51961	4.0948	5e-05	0.00034525	yes
ENSG00000177283.5	ENSG00000177283.5	FZD8	chr10:35638248-35642278	Prone	Prot	OK	17.6217	7.53212	-1.22623	-5.8155	5e-05	0.00034525	yes
ENSG00000177303.8	ENSG00000177303.8	CASKIN2	chr17:75500260-75515583	Prone	Prot	OK	6.44957	16.4075	1.34708	2.88684	5e-05	0.00034525	yes
ENSG00000177409.10	ENSG00000177409.10	SAMD9L	chr7:93130054-93148369	Prone	Prot	OK	8.88962	11.4649	0.367033	1.1324	5e-05	0.00034525	yes
ENSG00000177425.9	ENSG00000177425.9	PAWR	chr12:79574978-79942712	Prone	Prot	OK	39.0183	22.4554	-0.797091	-1.73726	5e-05	0.00034525	yes
ENSG00000177469.12	ENSG00000177469.12	PTRF	chr17:42402451-42423517	Prone	Prot	OK	259.275	342.796	0.402864	2.38818	5e-05	0.00034525	yes
ENSG00000177606.6	ENSG00000177606.6	JUN	chr1:58780787-58784327	Prone	Prot	OK	31.573	23.6713	-0.415551	-2.44265	5e-05	0.00034525	yes
ENSG00000177628.14	ENSG00000177628.14	GBA	chr1:155234451-155244699	Prone	Prot	OK	32.5499	46.7739	0.52305	2.11744	5e-05	0.00034525	yes
ENSG00000177679.15	ENSG00000177679.15	SRRM3	chr7:76201899-76287288	Prone	Prot	OK	1.94226	0.754177	-1.36476	-1.9091	5e-05	0.00034525	yes
ENSG00000177697.16	ENSG00000177697.16	CD151	chr11:818901-842545	Prone	Prot	OK	243.829	202.086	-0.270896	-1.48338	5e-05	0.00034525	yes
ENSG00000177971.8	ENSG00000177971.8	IMP3	chr15:75636138-75662301	Prone	Prot	OK	23.4812	17.1903	-0.449911	-1.23839	5e-05	0.00034525	yes
ENSG00000177989.12	ENSG00000177989.12	ODF3B	chr22:50523567-50532580	Prone	Prot	OK	5.45798	1.71169	-1.67295	-1.51088	5e-05	0.00034525	yes
ENSG00000178031.14	ENSG00000178031.14	ADAMTSL1	chr9:18473893-18910950	Prone	Prot	OK	1.64723	5.04249	1.6141	2.39423	5e-05	0.00034525	yes
ENSG00000178035.10	ENSG00000178035.10	IMPDH2	chr3:49024324-49029706	Prone	Prot	OK	70.2175	59.4847	-0.239311	-1.26662	5e-05	0.00034525	yes
ENSG00000178038.15	ENSG00000178038.15	ALS2CL	chr3:46668996-46693704	Prone	Prot	OK	3.30319	11.1622	1.75669	5.70794	5e-05	0.00034525	yes
ENSG00000178053.16	ENSG00000178053.16	MLF1	chr3:158571162-158607252	Prone	Prot	OK	3.25312	1.88278	-0.788955	-1.27805	5e-05	0.00034525	yes
ENSG00000178075.18	ENSG00000178075.18	GRAMD1C	chr3:113828181-113947570	Prone	Prot	OK	8.30999	4.64516	-0.83912	-1.93961	5e-05	0.00034525	yes
ENSG00000178078.10	ENSG00000178078.10	STAP2	chr19:4324042-4343491	Prone	Prot	OK	5.94825	4.10145	-0.536332	-1.10515	5e-05	0.00034525	yes
ENSG00000178175.10	ENSG00000178175.10	ZNF366	chr5:72442651-72507727	Prone	Prot	OK	1.00451	3.37693	1.74922	3.20701	5e-05	0.00034525	yes
ENSG00000178209.13	ENSG00000178209.13	PLEC	chr8:143915146-143976734	Prone	Prot	OK	38.0114	64.3895	0.760394	2.71721	5e-05	0.00034525	yes
ENSG00000178343.4	ENSG00000178343.4	SHISA3	chr4:42397838-42402487	Prone	Prot	OK	5.54196	3.93942	-0.492413	-1.56128	5e-05	0.00034525	yes
ENSG00000178538.8	ENSG00000178538.8	CA8	chr8:60187346-60281412	Prone	Prot	OK	2.77717	4.49873	0.695902	1.38733	5e-05	0.00034525	yes
ENSG00000178585.13	ENSG00000178585.13	CTNNBIP1	chr1:9848275-9910336	Prone	Prot	OK	18.823	12.6334	-0.575257	-1.63592	5e-05	0.00034525	yes
ENSG00000178695.5	ENSG00000178695.5	KCTD12	chr13:76880165-76886400	Prone	Prot	OK	243.974	348.944	0.51627	2.80924	5e-05	0.00034525	yes
ENSG00000178718.6	ENSG00000178718.6	RPP25	chr15:74954415-75021496	Prone	Prot	OK	13.7409	18.0538	0.393829	1.47746	5e-05	0.00034525	yes
ENSG00000178726.6	ENSG00000178726.6	THBD	chr20:23045632-23049741	Prone	Prot	OK	14.6135	26.5728	0.862651	4.82381	5e-05	0.00034525	yes
ENSG00000178764.7	ENSG00000178764.7	ZHX2	chr8:122781393-122974512	Prone	Prot	OK	2.6548	1.5928	-0.737036	-2.28105	5e-05	0.00034525	yes
ENSG00000178922.15	ENSG00000178922.15	HYI	chr1:43389881-43456995	Prone	Prot	OK	65.6054	24.1183	-1.44369	-4.27681	5e-05	0.00034525	yes
ENSG00000178950.15	ENSG00000178950.15	GAK	chr4:849275-932373	Prone	Prot	OK	19.1857	23.8653	0.314884	1.05672	5e-05	0.00034525	yes
ENSG00000178951.7	ENSG00000178951.7	ZBTB7A	chr19:4044363-4066945	Prone	Prot	OK	2.71088	3.69111	0.445296	1.38709	5e-05	0.00034525	yes
ENSG00000179044.14	ENSG00000179044.14	EXOC3L1	chr16:67184365-67190204	Prone	Prot	OK	2.96896	5.51743	0.894041	2.20857	5e-05	0.00034525	yes
ENSG00000179094.12	ENSG00000179094.12	PER1	chr17:8140471-8163546	Prone	Prot	OK	4.49585	7.78549	0.792195	1.23106	5e-05	0.00034525	yes
ENSG00000179119.13	ENSG00000179119.13	SPTY2D1	chr11:18599786-18634791	Prone	Prot	OK	5.22609	4.38128	-0.254378	-1.16381	5e-05	0.00034525	yes
ENSG00000179144.4	ENSG00000179144.4	GIMAP7	chr7:150514829-150521073	Prone	Prot	OK	36.8054	45.97	0.320775	1.81979	5e-05	0.00034525	yes
ENSG00000179163.11	ENSG00000179163.11	FUCA1	chr1:23845076-23868294	Prone	Prot	OK	8.59873	10.9206	0.344862	1.57458	5e-05	0.00034525	yes
ENSG00000179222.16	ENSG00000179222.16	MAGED1	chrX:51803006-51902357	Prone	Prot	OK	56.8804	42.8537	-0.40851	-2.00095	5e-05	0.00034525	yes
ENSG00000179364.12	ENSG00000179364.12	PACS2	chr14:105209285-105398147	Prone	Prot	OK	29.3031	37.2957	0.347954	1.17959	5e-05	0.00034525	yes
ENSG00000179403.11	ENSG00000179403.11	VWA1	chr1:1434860-1442882	Prone	Prot	OK	2.59167	1.47462	-0.813534	-1.12484	5e-05	0.00034525	yes
ENSG00000179431.6	ENSG00000179431.6	FJX1	chr11:35618418-35620868	Prone	Prot	OK	6.19417	4.70789	-0.39583	-1.26258	5e-05	0.00034525	yes
ENSG00000179456.10	ENSG00000179456.10	ZBTB18	chr1:244048938-244057476	Prone	Prot	OK	11.342	7.97157	-0.508744	-2.60662	5e-05	0.00034525	yes
ENSG00000179542.14	ENSG00000179542.14	SLITRK4	chrX:143622789-143635777	Prone	Prot	OK	3.36003	2.43221	-0.46621	-1.72981	5e-05	0.00034525	yes
ENSG00000179604.9	ENSG00000179604.9	CDC42EP4	chr17:73283623-73312175	Prone	Prot	OK	5.98822	8.43488	0.494241	1.32678	5e-05	0.00034525	yes
ENSG00000179862.6	ENSG00000179862.6	CITED4	chr1:40861050-40862366	Prone	Prot	OK	4.90003	7.26296	0.567768	1.25849	5e-05	0.00034525	yes
ENSG00000179918.16	ENSG00000179918.16	SEPHS2	chr16:30443630-30446181	Prone	Prot	OK	8.54993	10.2924	0.267593	1.24638	5e-05	0.00034525	yes
ENSG00000180353.9	ENSG00000180353.9	HCLS1	chr3:121631398-121660927	Prone	Prot	OK	15.2281	12.1123	-0.330259	-1.44727	5e-05	0.00034525	yes
ENSG00000180573.9	ENSG00000180573.9	HIST1H2AC	chr6:26124144-26139116	Prone	Prot	OK	24.0978	28.4435	0.239193	1.22498	5e-05	0.00034525	yes
ENSG00000180628.13	ENSG00000180628.13	PCGF5	chr10:91163011-91284331	Prone	Prot	OK	11.1217	14.0609	0.338312	1.26387	5e-05	0.00034525	yes
ENSG00000180694.12	ENSG00000180694.12	TMEM64	chr8:90621994-90985257	Prone	Prot	OK	18.6911	13.8552	-0.431921	-1.74211	5e-05	0.00034525	yes
ENSG00000180801.12	ENSG00000180801.12	ARSJ	chr4:113900283-113979727	Prone	Prot	OK	8.99706	5.53566	-0.700698	-2.26244	5e-05	0.00034525	yes
ENSG00000180891.11	ENSG00000180891.11	CUEDC1	chr17:57861242-57955323	Prone	Prot	OK	9.73623	12.9732	0.414097	1.18245	5e-05	0.00034525	yes
ENSG00000180998.10	ENSG00000180998.10	GPR137C	chr14:52553147-52637713	Prone	Prot	OK	0.589582	1.04353	0.823702	1.09253	5e-05	0.00034525	yes
ENSG00000181019.11	ENSG00000181019.11	NQO1	chr16:69706995-69726951	Prone	Prot	OK	213.45	428.892	1.00672	5.62559	5e-05	0.00034525	yes
ENSG00000181104.6	ENSG00000181104.6	F2R	chr5:76403248-76735781	Prone	Prot	OK	89.7655	63.3771	-0.502199	-2.78889	5e-05	0.00034525	yes
ENSG00000181163.12	ENSG00000181163.12	NPM1	chr5:171387115-171411137	Prone	Prot	OK	486.061	372.991	-0.381998	-1.502	5e-05	0.00034525	yes
ENSG00000181191.11	ENSG00000181191.11	PJA1	chrX:69160850-69165793	Prone	Prot	OK	8.46428	5.82847	-0.538271	-1.37627	5e-05	0.00034525	yes
ENSG00000181444.11	ENSG00000181444.11	ZNF467	chr7:149764181-149773479	Prone	Prot	OK	4.66309	10.935	1.22959	3.74118	5e-05	0.00034525	yes
ENSG00000181458.9	ENSG00000181458.9	TMEM45A	chr3:100492618-100577444	Prone	Prot	OK	13.9053	9.92954	-0.485838	-1.79933	5e-05	0.00034525	yes
ENSG00000181523.11	ENSG00000181523.11	SGSH	chr17:80169991-80253500	Prone	Prot	OK	19.4693	28.2641	0.537766	1.46236	5e-05	0.00034525	yes
ENSG00000181588.16	ENSG00000181588.16	MEX3D	chr19:1554668-1568058	Prone	Prot	OK	30.4975	22.7312	-0.424017	-2.13412	5e-05	0.00034525	yes
ENSG00000181652.17	ENSG00000181652.17	ATG9B	chr7:150990994-151024499	Prone	Prot	OK	9.41118	21.7151	1.20625	1.54919	5e-05	0.00034525	yes
ENSG00000181751.8	ENSG00000181751.8	C5orf30	chr5:103258701-103278660	Prone	Prot	OK	5.70424	4.61134	-0.306848	-1.11219	5e-05	0.00034525	yes
ENSG00000181789.13	ENSG00000181789.13	COPG1	chr3:129249605-129277773	Prone	Prot	OK	57.0805	44.9294	-0.345338	-1.66981	5e-05	0.00034525	yes
ENSG00000181885.17	ENSG00000181885.17	CLDN7	chr17:7240013-7263983	Prone	Prot	OK	29.7989	16.2217	-0.877332	-1.48382	5e-05	0.00034525	yes
ENSG00000181938.12	ENSG00000181938.12	GINS3	chr16:58295079-58406144	Prone	Prot	OK	3.22895	4.45067	0.462957	0.966912	5e-05	0.00034525	yes
ENSG00000181982.16	ENSG00000181982.16	CCDC149	chr4:24806116-24980204	Prone	Prot	OK	6.24546	4.52105	-0.466148	-1.28061	5e-05	0.00034525	yes
ENSG00000182022.16	ENSG00000182022.16	CHST15	chr10:124007665-124093607	Prone	Prot	OK	25.9628	16.279	-0.673436	-2.46015	5e-05	0.00034525	yes
ENSG00000182054.8	ENSG00000182054.8	IDH2	chr15:90083044-90102504	Prone	Prot	OK	41.8035	32.4668	-0.364657	-2.0043	5e-05	0.00034525	yes
ENSG00000182154.7	ENSG00000182154.7	MRPL41	chr9:137551198-137552555	Prone	Prot	OK	26.7633	34.2492	0.355814	1.51671	5e-05	0.00034525	yes
ENSG00000182158.13	ENSG00000182158.13	CREB3L2	chr7:137874978-138002067	Prone	Prot	OK	9.01152	5.63573	-0.677168	-1.51184	5e-05	0.00034525	yes
ENSG00000182168.13	ENSG00000182168.13	UNC5C	chr4:95162503-95552457	Prone	Prot	OK	1.82434	0.509803	-1.83936	-3.37452	5e-05	0.00034525	yes
ENSG00000182173.11	ENSG00000182173.11	TSEN54	chr17:75516059-75524739	Prone	Prot	OK	6.21958	10.644	0.775149	1.66354	5e-05	0.00034525	yes
ENSG00000182197.9	ENSG00000182197.9	EXT1	chr8:117794489-118111853	Prone	Prot	OK	31.2361	24.1188	-0.373059	-1.17039	5e-05	0.00034525	yes
ENSG00000182208.11	ENSG00000182208.11	MOB2	chr11:1469456-1501247	Prone	Prot	OK	16.9984	32.6545	0.941884	3.61673	5e-05	0.00034525	yes
ENSG00000182240.14	ENSG00000182240.14	BACE2	chr21:41167800-41282518	Prone	Prot	OK	264.979	155.936	-0.764923	-3.44356	5e-05	0.00034525	yes
ENSG00000182287.12	ENSG00000182287.12	AP1S2	chrX:15825805-15855014	Prone	Prot	OK	44.981	52.4489	0.221596	1.20085	5e-05	0.00034525	yes
ENSG00000182481.7	ENSG00000182481.7	KPNA2	chr17:68035518-68046842	Prone	Prot	OK	44.1848	65.0206	0.557346	3.10432	5e-05	0.00034525	yes
ENSG00000182492.14	ENSG00000182492.14	BGN	chrX:153444719-153509554	Prone	Prot	OK	26.5136	45.7082	0.785722	3.67563	5e-05	0.00034525	yes
ENSG00000182511.10	ENSG00000182511.10	FES	chr15:90883694-90895776	Prone	Prot	OK	19.5567	31.5354	0.689311	2.06514	5e-05	0.00034525	yes
ENSG00000182541.16	ENSG00000182541.16	LIMK2	chr22:31212238-31280080	Prone	Prot	OK	22.138	33.1826	0.583905	2.3078	5e-05	0.00034525	yes
ENSG00000182551.12	ENSG00000182551.12	ADI1	chr2:3496955-3523197	Prone	Prot	OK	25.454	31.0315	0.285841	1.55264	5e-05	0.00034525	yes
ENSG00000182606.13	ENSG00000182606.13	TRAK1	chr3:42013801-42225889	Prone	Prot	OK	11.9717	16.7303	0.482832	2.38633	5e-05	0.00034525	yes
ENSG00000182621.15	ENSG00000182621.15	PLCB1	chr20:8114452-8968360	Prone	Prot	OK	9.03651	12.0645	0.416928	1.14071	5e-05	0.00034525	yes
ENSG00000182749.5	ENSG00000182749.5	PAQR7	chr1:25859612-25871253	Prone	Prot	OK	3.60626	2.46169	-0.550857	-1.84344	5e-05	0.00034525	yes
ENSG00000182809.9	ENSG00000182809.9	CRIP2	chr14:105472961-105480170	Prone	Prot	OK	204.486	262.548	0.360582	2.04412	5e-05	0.00034525	yes
ENSG00000182827.8	ENSG00000182827.8	ACBD3	chr1:226144678-226186730	Prone	Prot	OK	15.2155	11.1151	-0.453025	-2.38246	5e-05	0.00034525	yes
ENSG00000182916.7	ENSG00000182916.7	TCEAL7	chrX:103330195-103332326	Prone	Prot	OK	4.1473	2.74894	-0.593297	-1.47885	5e-05	0.00034525	yes
ENSG00000183010.15	ENSG00000183010.15	PYCR1	chr17:81932383-81947601	Prone	Prot	OK	14.2854	7.85238	-0.863342	-2.1962	5e-05	0.00034525	yes
ENSG00000183018.7	ENSG00000183018.7	SPNS2	chr17:4497393-4555631	Prone	Prot	OK	20.0485	30.603	0.610178	2.2741	5e-05	0.00034525	yes
ENSG00000183077.14	ENSG00000183077.14	AFMID	chr17:78187316-78207701	Prone	Prot	OK	16.3821	12.3534	-0.407207	-1.20954	5e-05	0.00034525	yes
ENSG00000183087.13	ENSG00000183087.13	GAS6	chr13:113759239-113864067	Prone	Prot	OK	50.7722	64.8955	0.354078	1.71645	5e-05	0.00034525	yes
ENSG00000183161.4	ENSG00000183161.4	FANCF	chr11:22622518-22813055	Prone	Prot	OK	4.96915	4.00203	-0.312266	-1.30665	5e-05	0.00034525	yes
ENSG00000183255.10	ENSG00000183255.10	PTTG1IP	chr21:44849584-44873903	Prone	Prot	OK	181.179	205.653	0.182797	1.1166	5e-05	0.00034525	yes
ENSG00000183496.5	ENSG00000183496.5	MEX3B	chr15:82041777-82046141	Prone	Prot	OK	7.85068	6.04838	-0.376269	-1.64642	5e-05	0.00034525	yes
ENSG00000183578.5	ENSG00000183578.5	TNFAIP8L3	chr15:51037487-51338610	Prone	Prot	OK	36.3607	49.4078	0.442361	2.70013	5e-05	0.00034525	yes
ENSG00000183598.3	ENSG00000183598.3	HIST2H3D	chr1:149813270-149813681	Prone	Prot	OK	6.62567	12.9325	0.964867	1.66956	5e-05	0.00034525	yes
ENSG00000183615.5	ENSG00000183615.5	FAM167B	chr1:32247232-32248856	Prone	Prot	OK	7.47786	24.0007	1.68238	5.60849	5e-05	0.00034525	yes
ENSG00000183621.14	ENSG00000183621.14	ZNF438	chr10:30820206-31031937	Prone	Prot	OK	2.44241	3.27434	0.422901	1.4469	5e-05	0.00034525	yes
ENSG00000183624.12	ENSG00000183624.12	HMCES	chr3:129278827-129306186	Prone	Prot	OK	12.8001	15.5258	0.278505	1.24104	5e-05	0.00034525	yes
ENSG00000183665.5	ENSG00000183665.5	TRMT12	chr8:124450819-124462150	Prone	Prot	OK	4.93574	6.60046	0.4193	1.08732	5e-05	0.00034525	yes
ENSG00000183691.4	ENSG00000183691.4	NOG	chr17:56593698-56595590	Prone	Prot	OK	4.75204	1.23616	-1.94268	-3.84476	5e-05	0.00034525	yes
ENSG00000183696.12	ENSG00000183696.12	UPP1	chr7:48088627-48108733	Prone	Prot	OK	32.7628	46.6256	0.509063	2.24988	5e-05	0.00034525	yes
ENSG00000183741.10	ENSG00000183741.10	CBX6	chr22:38861449-38872314	Prone	Prot	OK	21.1182	29.4651	0.480523	2.73493	5e-05	0.00034525	yes
ENSG00000183856.9	ENSG00000183856.9	IQGAP3	chr1:156525404-156572604	Prone	Prot	OK	2.12312	3.02534	0.510913	1.39438	5e-05	0.00034525	yes
ENSG00000183864.4	ENSG00000183864.4	TOB2	chr22:41433491-41447023	Prone	Prot	OK	13.1097	16.3491	0.318585	1.41038	5e-05	0.00034525	yes
ENSG00000183963.17	ENSG00000183963.17	SMTN	chr22:31051629-31104757	Prone	Prot	OK	27.4829	20.7837	-0.403081	-1.54981	5e-05	0.00034525	yes
ENSG00000184005.10	ENSG00000184005.10	ST6GALNAC3	chr1:76074718-76634601	Prone	Prot	OK	28.7302	55.0704	0.938708	2.62217	5e-05	0.00034525	yes
ENSG00000184009.8	ENSG00000184009.8	ACTG1	chr17:81509970-81527776	Prone	Prot	OK	1867.81	1428.39	-0.386951	-1.45579	5e-05	0.00034525	yes
ENSG00000184113.9	ENSG00000184113.9	CLDN5	chr22:19523023-19527545	Prone	Prot	OK	227.237	311.493	0.454999	2.83469	5e-05	0.00034525	yes
ENSG00000184182.17	ENSG00000184182.17	UBE2F	chr2:237966826-238099413	Prone	Prot	OK	17.0876	24.5171	0.520834	1.73425	5e-05	0.00034525	yes
ENSG00000184207.8	ENSG00000184207.8	PGP	chr16:2211996-2214807	Prone	Prot	OK	5.67305	7.07172	0.317937	1.24893	5e-05	0.00034525	yes
ENSG00000184226.13	ENSG00000184226.13	PCDH9	chr13:66302833-67230445	Prone	Prot	OK	1.55161	1.07311	-0.531977	-0.994026	5e-05	0.00034525	yes
ENSG00000184232.7	ENSG00000184232.7	OAF	chr11:120210766-120230332	Prone	Prot	OK	4.79629	19.7742	2.04363	6.38527	5e-05	0.00034525	yes
ENSG00000184260.5	ENSG00000184260.5	HIST2H2AC	chr1:149886974-149887364	Prone	Prot	OK	29.5306	44.8888	0.604143	1.80821	5e-05	0.00034525	yes
ENSG00000184292.6	ENSG00000184292.6	TACSTD2	chr1:58575422-58577773	Prone	Prot	OK	3.54878	5.93661	0.742313	2.35869	5e-05	0.00034525	yes
ENSG00000184344.3	ENSG00000184344.3	GDF3	chr12:7689781-7695776	Prone	Prot	OK	3.42183	18.2787	2.41732	7.32808	5e-05	0.00034525	yes
ENSG00000184357.4	ENSG00000184357.4	HIST1H1B	chr6:27866848-27867529	Prone	Prot	OK	53.3254	65.128	0.288455	1.35392	5e-05	0.00034525	yes
ENSG00000184371.12	ENSG00000184371.12	CSF1	chr1:109910241-109930992	Prone	Prot	OK	6.91537	9.5831	0.470686	1.8611	5e-05	0.00034525	yes
ENSG00000184428.11	ENSG00000184428.11	TOP1MT	chr8:143304383-143359979	Prone	Prot	OK	10.5973	7.39712	-0.518662	-1.58536	5e-05	0.00034525	yes
ENSG00000184465.14	ENSG00000184465.14	WDR27	chr6:169457211-169702048	Prone	Prot	OK	32.4877	22.3862	-0.537287	-1.69514	5e-05	0.00034525	yes
ENSG00000184489.10	ENSG00000184489.10	PTP4A3	chr8:141389938-141432454	Prone	Prot	OK	4.42536	15.5269	1.8109	5.01602	5e-05	0.00034525	yes
ENSG00000184557.4	ENSG00000184557.4	SOCS3	chr17:78356777-78360077	Prone	Prot	OK	11.2514	8.51192	-0.402547	-1.74786	5e-05	0.00034525	yes
ENSG00000184584.11	ENSG00000184584.11	TMEM173	chr5:139475533-139482935	Prone	Prot	OK	36.3365	73.2636	1.01168	4.4186	5e-05	0.00034525	yes
ENSG00000184588.16	ENSG00000184588.16	PDE4B	chr1:65792513-66374579	Prone	Prot	OK	29.5223	8.6815	-1.76579	-6.46557	5e-05	0.00034525	yes
ENSG00000184640.16	ENSG00000184640.16	2016-09-09	chr17:77257736-77500596	Prone	Prot	OK	38.1366	58.2234	0.610422	2.23875	5e-05	0.00034525	yes
ENSG00000184752.11	ENSG00000184752.11	NDUFA12	chr12:94897054-95003770	Prone	Prot	OK	35.5886	45.8968	0.366978	1.68404	5e-05	0.00034525	yes
ENSG00000184792.14	ENSG00000184792.14	OSBP2	chr22:30693781-30907824	Prone	Prot	OK	4.8311	7.33713	0.602864	1.85126	5e-05	0.00034525	yes
ENSG00000184897.5	ENSG00000184897.5	H1FX	chr3:129314770-129326225	Prone	Prot	OK	25.468	32.8857	0.368775	1.64859	5e-05	0.00034525	yes
ENSG00000184916.7	ENSG00000184916.7	JAG2	chr14:105140980-105181323	Prone	Prot	OK	14.822	22.4587	0.599536	1.50498	5e-05	0.00034525	yes
ENSG00000185022.10	ENSG00000185022.10	MAFF	chr22:38111494-38216511	Prone	Prot	OK	55.553	18.7722	-1.56527	-7.37591	5e-05	0.00034525	yes
ENSG00000185070.9	ENSG00000185070.9	FLRT2	chr14:85530143-85654426	Prone	Prot	OK	32.5763	60.5376	0.894007	2.08873	5e-05	0.00034525	yes
ENSG00000185100.9	ENSG00000185100.9	ADSSL1	chr14:104724185-104747325	Prone	Prot	OK	5.12731	0.593335	-3.11128	-2.35203	5e-05	0.00034525	yes
ENSG00000185112.5	ENSG00000185112.5	FAM43A	chr3:194686543-194689037	Prone	Prot	OK	125.281	89.3811	-0.487131	-3.07116	5e-05	0.00034525	yes
ENSG00000185187.11	ENSG00000185187.11	SIGIRR	chr11:405715-417455	Prone	Prot	OK	28.9864	39.1561	0.433861	1.62581	5e-05	0.00034525	yes
ENSG00000185201.15	ENSG00000185201.15	IFITM2	chr11:307630-315272	Prone	Prot	OK	50.9701	65.7008	0.366261	1.67826	5e-05	0.00034525	yes
ENSG00000185339.7	ENSG00000185339.7	TCN2	chr22:30576624-30627278	Prone	Prot	OK	87.7239	147.762	0.752235	3.95405	5e-05	0.00034525	yes
ENSG00000185340.14	ENSG00000185340.14	GAS2L1	chr22:29306581-29312785	Prone	Prot	OK	14.1629	20.4951	0.533167	2.26933	5e-05	0.00034525	yes
ENSG00000185347.16	ENSG00000185347.16	C14orf80	chr14:105486316-105499575	Prone	Prot	OK	2.50501	4.27282	0.770371	1.01591	5e-05	0.00034525	yes
ENSG00000185361.7	ENSG00000185361.7	TNFAIP8L1	chr19:4639517-4670370	Prone	Prot	OK	27.2363	20.755	-0.39207	-1.80407	5e-05	0.00034525	yes
ENSG00000185386.13	ENSG00000185386.13	MAPK11	chr22:50263712-50270767	Prone	Prot	OK	12.3707	15.1842	0.295636	1.33138	5e-05	0.00034525	yes
ENSG00000185432.11	ENSG00000185432.11	METTL7A	chr12:50923471-50932517	Prone	Prot	OK	11.91	25.3287	1.0886	4.27454	5e-05	0.00034525	yes
ENSG00000185551.11	ENSG00000185551.11	NR2F2	chr15:95990581-96340263	Prone	Prot	OK	13.4149	25.3302	0.917019	3.04628	5e-05	0.00034525	yes
ENSG00000185567.6	ENSG00000185567.6	AHNAK2	chr14:104924815-104978357	Prone	Prot	OK	19.878	35.8149	0.849392	4.03351	5e-05	0.00034525	yes
ENSG00000185614.4	ENSG00000185614.4	FAM212A	chr3:49803253-49805030	Prone	Prot	OK	18.6246	29.2763	0.652527	2.88087	5e-05	0.00034525	yes
ENSG00000185650.9	ENSG00000185650.9	ZFP36L1	chr14:68787659-68796253	Prone	Prot	OK	11.6879	21.7823	0.898137	3.09207	5e-05	0.00034525	yes
ENSG00000185745.9	ENSG00000185745.9	IFIT1	chr10:89213568-89414557	Prone	Prot	OK	0.693769	2.27669	1.71441	1.238	5e-05	0.00034525	yes
ENSG00000185753.11	ENSG00000185753.11	CXorf38	chrX:40626920-40647554	Prone	Prot	OK	5.11393	3.98343	-0.360422	-1.42322	5e-05	0.00034525	yes
ENSG00000185883.9	ENSG00000185883.9	ATP6V0C	chr16:2475117-2531422	Prone	Prot	OK	18.7327	26.4188	0.49601	1.1275	5e-05	0.00034525	yes
ENSG00000185947.13	ENSG00000185947.13	ZNF267	chr16:31873757-31917357	Prone	Prot	OK	8.10655	6.02633	-0.427807	-1.42896	5e-05	0.00034525	yes
ENSG00000185989.10	ENSG00000185989.10	RASA3	chr13:113977782-114132611	Prone	Prot	OK	17.8699	12.1284	-0.559144	-3.15088	5e-05	0.00034525	yes
ENSG00000186111.7	ENSG00000186111.7	PIP5K1C	chr19:3630182-3700479	Prone	Prot	OK	7.98237	11.8604	0.571267	1.86908	5e-05	0.00034525	yes
ENSG00000186174.11	ENSG00000186174.11	BCL9L	chr11:118883765-118958559	Prone	Prot	OK	2.29173	4.48342	0.968158	1.39015	5e-05	0.00034525	yes
ENSG00000186283.12	ENSG00000186283.12	TOR3A	chr1:179081376-179098023	Prone	Prot	OK	5.45779	8.47143	0.634289	1.74397	5e-05	0.00034525	yes
ENSG00000186350.9	ENSG00000186350.9	RXRA	chr9:134317097-134440585	Prone	Prot	OK	15.771	22.0801	0.485467	2.30114	5e-05	0.00034525	yes
ENSG00000186352.7	ENSG00000186352.7	ANKRD37	chr4:185396020-185425985	Prone	Prot	OK	7.25117	2.39681	-1.5971	-1.48011	5e-05	0.00034525	yes
ENSG00000186377.7	ENSG00000186377.7	CYP4X1	chr1:47023567-47050751	Prone	Prot	OK	2.30614	4.04727	0.811471	2.07415	5e-05	0.00034525	yes
ENSG00000186480.11	ENSG00000186480.11	INSIG1	chr7:155297775-155310235	Prone	Prot	OK	16.0749	29.3244	0.867291	3.80347	5e-05	0.00034525	yes
ENSG00000186642.14	ENSG00000186642.14	PDE2A	chr11:72576140-72674591	Prone	Prot	OK	38.1055	26.6194	-0.517522	-1.64276	5e-05	0.00034525	yes
ENSG00000186654.19	ENSG00000186654.19	PRR5	chr22:44668546-44862788	Prone	Prot	OK	0.977424	3.26057	1.73807	1.7276	5e-05	0.00034525	yes
ENSG00000186665.8	ENSG00000186665.8	C17orf58	chr17:67991100-67993649	Prone	Prot	OK	11.4704	8.77885	-0.385807	-1.5445	5e-05	0.00034525	yes
ENSG00000186834.3	ENSG00000186834.3	HEXIM1	chr17:45148501-45171584	Prone	Prot	OK	4.32534	6.45277	0.577104	2.1868	5e-05	0.00034525	yes
ENSG00000186866.15	ENSG00000186866.15	POFUT2	chr21:45263927-45287898	Prone	Prot	OK	20.0961	13.6477	-0.558259	-1.37364	5e-05	0.00034525	yes
ENSG00000186918.12	ENSG00000186918.12	ZNF395	chr8:28345584-28490318	Prone	Prot	OK	13.9783	8.39038	-0.736383	-1.72123	5e-05	0.00034525	yes
ENSG00000187049.8	ENSG00000187049.8	TMEM216	chr11:61391686-61398863	Prone	Prot	OK	7.46947	5.20569	-0.520916	-1.28214	5e-05	0.00034525	yes
ENSG00000187051.7	ENSG00000187051.7	RPS19BP1	chr22:39529092-39532855	Prone	Prot	OK	29.5579	23.7798	-0.313808	-1.39033	5e-05	0.00034525	yes
ENSG00000187189.10	ENSG00000187189.10	TSPYL4	chr6:116249960-116254140	Prone	Prot	OK	3.31938	4.09039	0.301322	1.23611	5e-05	0.00034525	yes
ENSG00000187231.12	ENSG00000187231.12	SESTD1	chr2:179101691-179264790	Prone	Prot	OK	26.8011	19.4052	-0.465848	-1.223	5e-05	0.00034525	yes
ENSG00000187244.9	ENSG00000187244.9	BCAM	chr19:44809058-44821420	Prone	Prot	OK	12.6196	24.7923	0.974226	4.14137	5e-05	0.00034525	yes
ENSG00000187479.5	ENSG00000187479.5	C11orf96	chr11:43921058-44001157	Prone	Prot	OK	2.21638	0.813676	-1.44568	-1.51528	5e-05	0.00034525	yes
ENSG00000187498.13	ENSG00000187498.13	COL4A1	chr13:110148962-110513027	Prone	Prot	OK	297.402	197.297	-0.59204	-2.05517	5e-05	0.00034525	yes
ENSG00000187513.8	ENSG00000187513.8	GJA4	chr1:34712736-34859816	Prone	Prot	OK	37.4078	85.1302	1.18633	5.19939	5e-05	0.00034525	yes
ENSG00000187553.7	ENSG00000187553.7	CYP26C1	chr10:93060807-93069536	Prone	Prot	OK	0.948243	0.515879	-0.878225	-1.19407	5e-05	0.00034525	yes
ENSG00000187601.4	ENSG00000187601.4	MAGEH1	chrX:55452104-55453566	Prone	Prot	OK	18.5678	15.5147	-0.259165	-1.20206	5e-05	0.00034525	yes
ENSG00000187608.7	ENSG00000187608.7	ISG15	chr1:1001137-1014541	Prone	Prot	OK	21.2453	26.9292	0.342033	1.34118	5e-05	0.00034525	yes
ENSG00000187792.4	ENSG00000187792.4	ZNF70	chr22:23738677-23751092	Prone	Prot	OK	1.44063	0.974304	-0.564253	-1.90835	5e-05	0.00034525	yes
ENSG00000187838.15	ENSG00000187838.15	TMEM256-PLSCR3	chr17:7380533-7404137	Prone	Prot	OK	14.3002	21.0967	0.560988	1.42044	5e-05	0.00034525	yes
ENSG00000187840.4	ENSG00000187840.4	EIF4EBP1	chr8:38030340-38060365	Prone	Prot	OK	64.8573	40.0924	-0.693939	-3.34413	5e-05	0.00034525	yes
ENSG00000188070.9	ENSG00000188070.9	C11orf95	chr11:63759891-63768775	Prone	Prot	OK	12.3122	15.5913	0.340655	1.31987	5e-05	0.00034525	yes
ENSG00000188157.12	ENSG00000188157.12	AGRN	chr1:1020122-1056118	Prone	Prot	OK	20.0884	34.3388	0.773478	2.11237	5e-05	0.00034525	yes
ENSG00000188211.7	ENSG00000188211.7	NCR3LG1	chr11:17351725-17377341	Prone	Prot	OK	1.3922	2.10504	0.59648	2.26693	5e-05	0.00034525	yes
ENSG00000188229.5	ENSG00000188229.5	TUBB4B	chr9:137241212-137247770	Prone	Prot	OK	37.0353	51.2352	0.468237	2.67368	5e-05	0.00034525	yes
ENSG00000188486.3	ENSG00000188486.3	H2AFX	chr11:119093853-119095467	Prone	Prot	OK	11.1181	16.5226	0.571525	2.10514	5e-05	0.00034525	yes
ENSG00000188522.13	ENSG00000188522.13	FAM83G	chr17:18950344-19047637	Prone	Prot	OK	4.76112	3.26126	-0.545873	-1.08392	5e-05	0.00034525	yes
ENSG00000188559.12	ENSG00000188559.12	RALGAPA2	chr20:20389551-20712488	Prone	Prot	OK	16.1443	24.7633	0.617183	1.98765	5e-05	0.00034525	yes
ENSG00000188596.8	ENSG00000188596.8	CFAP54	chr12:96489570-96875555	Prone	Prot	OK	11.5696	8.58969	-0.429656	-1.36081	5e-05	0.00034525	yes
ENSG00000188603.15	ENSG00000188603.15	CLN3	chr16:28456371-28498970	Prone	Prot	OK	22.1953	29.0111	0.386351	1.46903	5e-05	0.00034525	yes
ENSG00000188706.11	ENSG00000188706.11	ZDHHC9	chrX:129803287-129843909	Prone	Prot	OK	8.68231	6.12817	-0.502623	-1.30178	5e-05	0.00034525	yes
ENSG00000189060.5	ENSG00000189060.5	H1F0	chr22:37805092-37807436	Prone	Prot	OK	19.7664	16.8414	-0.231038	-1.23144	5e-05	0.00034525	yes
ENSG00000189129.12	ENSG00000189129.12	PLAC9	chr10:80131681-80145359	Prone	Prot	OK	1.85412	9.61647	2.37477	3.33079	5e-05	0.00034525	yes
ENSG00000189152.9	ENSG00000189152.9	GRAPL	chr17:19127468-19159176	Prone	Prot	OK	7.9795	3.24941	-1.29612	-2.4174	5e-05	0.00034525	yes
ENSG00000189221.8	ENSG00000189221.8	MAOA	chrX:43654906-43746824	Prone	Prot	OK	10.5025	6.34225	-0.727662	-2.43804	5e-05	0.00034525	yes
ENSG00000189319.12	ENSG00000189319.12	FAM53B	chr10:124461833-124791870	Prone	Prot	OK	4.71082	6.71377	0.511145	1.66094	5e-05	0.00034525	yes
ENSG00000189403.13	ENSG00000189403.13	HMGB1	chr13:30456703-30617597	Prone	Prot	OK	138.845	116.699	-0.250683	-1.29752	5e-05	0.00034525	yes
ENSG00000196139.10	ENSG00000196139.10	AKR1C3	chr10:4922563-5135226	Prone	Prot	OK	46.1329	64.4651	0.482722	2.49553	5e-05	0.00034525	yes
ENSG00000196151.9	ENSG00000196151.9	WDSUB1	chr2:159235792-159286799	Prone	Prot	OK	4.22174	5.39204	0.352994	1.19995	5e-05	0.00034525	yes
ENSG00000196154.10	ENSG00000196154.10	S100A4	chr1:153543612-153550136	Prone	Prot	OK	2.96404	25.2117	3.08846	5.94372	5e-05	0.00034525	yes
ENSG00000196169.13	ENSG00000196169.13	KIF19	chr17:74326209-74355820	Prone	Prot	OK	1.16251	2.40549	1.04909	2.07695	5e-05	0.00034525	yes
ENSG00000196196.2	ENSG00000196196.2	HRCT1	chr9:35906191-35907141	Prone	Prot	OK	0.818834	1.85177	1.17726	1.60605	5e-05	0.00034525	yes
ENSG00000196209.11	ENSG00000196209.11	SIRPB2	chr20:1442161-1491587	Prone	Prot	OK	3.22045	0.702257	-2.19719	-1.7691	5e-05	0.00034525	yes
ENSG00000196352.12	ENSG00000196352.12	CD55	chr1:207321507-207360966	Prone	Prot	OK	63.6291	43.9464	-0.533941	-2.96934	5e-05	0.00034525	yes
ENSG00000196411.8	ENSG00000196411.8	EPHB4	chr7:100802564-100867009	Prone	Prot	OK	95.658	182.304	0.930391	4.47017	5e-05	0.00034525	yes
ENSG00000196421.6	ENSG00000196421.6	LINC00176	chr20:63939828-64049641	Prone	Prot	OK	9.94882	5.06187	-0.974856	-1.31925	5e-05	0.00034525	yes
ENSG00000196502.10	ENSG00000196502.10	SULT1A1	chr16:28605195-28623625	Prone	Prot	OK	1.50729	2.44668	0.698872	1.10383	5e-05	0.00034525	yes
ENSG00000196526.9	ENSG00000196526.9	AFAP1	chr4:7754089-7940296	Prone	Prot	OK	16.519	13.3509	-0.307189	-1.24251	5e-05	0.00034525	yes
ENSG00000196544.7	ENSG00000196544.7	C17orf59	chr17:8188332-8190907	Prone	Prot	OK	3.35482	4.51627	0.428897	1.2221	5e-05	0.00034525	yes
ENSG00000196562.13	ENSG00000196562.13	SULF2	chr20:47501901-47786616	Prone	Prot	OK	36.0126	58.6042	0.7025	2.05094	5e-05	0.00034525	yes
ENSG00000196569.10	ENSG00000196569.10	LAMA2	chr6:128883140-129516569	Prone	Prot	OK	2.43143	1.3993	-0.797102	-1.16106	5e-05	0.00034525	yes
ENSG00000196586.12	ENSG00000196586.12	MYO6	chr6:75749191-75919537	Prone	Prot	OK	10.441	9.09133	-0.1997	-1.1019	5e-05	0.00034525	yes
ENSG00000196611.4	ENSG00000196611.4	MMP1	chr11:102746967-102843803	Prone	Prot	OK	1029.79	859.216	-0.261259	-1.27614	5e-05	0.00034525	yes
ENSG00000196628.12	ENSG00000196628.12	TCF4	chr18:55222330-55664787	Prone	Prot	OK	158.609	91.0068	-0.801428	-2.57713	5e-05	0.00034525	yes
ENSG00000196715.5	ENSG00000196715.5	VKORC1L1	chr7:65873266-65959563	Prone	Prot	OK	10.2343	7.56338	-0.436312	-1.70998	5e-05	0.00034525	yes
ENSG00000196747.4	ENSG00000196747.4	HIST1H2AI	chr6:27808198-27808701	Prone	Prot	OK	17.8013	23.8368	0.421207	1.28252	5e-05	0.00034525	yes
ENSG00000196782.11	ENSG00000196782.11	MAML3	chr4:139665767-140154184	Prone	Prot	OK	4.63226	3.56493	-0.377845	-1.29932	5e-05	0.00034525	yes
ENSG00000196787.3	ENSG00000196787.3	HIST1H2AG	chr6:27133041-27135291	Prone	Prot	OK	9.28252	12.9149	0.476452	2.19759	5e-05	0.00034525	yes
ENSG00000196821.8	ENSG00000196821.8	C6orf106	chr6:34587287-34697470	Prone	Prot	OK	16.2842	18.7841	0.20604	1.20178	5e-05	0.00034525	yes
ENSG00000196866.2	ENSG00000196866.2	HIST1H2AD	chr6:26198850-26199243	Prone	Prot	OK	38.4364	49.0092	0.350577	1.15414	5e-05	0.00034525	yes
ENSG00000196878.11	ENSG00000196878.11	LAMB3	chr1:209614869-209652466	Prone	Prot	OK	2.19242	12.9036	2.55718	5.87943	5e-05	0.00034525	yes
ENSG00000196961.11	ENSG00000196961.11	AP2A1	chr19:49766967-49817376	Prone	Prot	OK	29.9066	35.5747	0.250387	1.25864	5e-05	0.00034525	yes
ENSG00000196975.13	ENSG00000196975.13	ANXA4	chr2:69457996-69826464	Prone	Prot	OK	18.8203	24.4777	0.379177	1.20319	5e-05	0.00034525	yes
ENSG00000197045.11	ENSG00000197045.11	GMFB	chr14:54474483-54489196	Prone	Prot	OK	22.8639	12.9016	-0.825521	-2.17334	5e-05	0.00034525	yes
ENSG00000197077.11	ENSG00000197077.11	KIAA1671	chr22:24952729-25197448	Prone	Prot	OK	16.7637	25.3813	0.598425	3.45737	5e-05	0.00034525	yes
ENSG00000197142.9	ENSG00000197142.9	ACSL5	chr10:112374017-112446917	Prone	Prot	OK	7.30671	11.6964	0.678774	1.67847	5e-05	0.00034525	yes
ENSG00000197245.4	ENSG00000197245.4	FAM110D	chr1:26159019-26162628	Prone	Prot	OK	2.44611	5.87962	1.26523	2.847	5e-05	0.00034525	yes
ENSG00000197261.10	ENSG00000197261.10	C6orf141	chr6:49550645-49561907	Prone	Prot	OK	23.5068	13.0324	-0.850977	-3.1105	5e-05	0.00034525	yes
ENSG00000197291.7	ENSG00000197291.7	RAMP2-AS1	chr17:42753913-42763041	Prone	Prot	OK	2.39635	4.92056	1.03799	1.77025	5e-05	0.00034525	yes
ENSG00000197355.9	ENSG00000197355.9	UAP1L1	chr9:137077500-137084539	Prone	Prot	OK	28.4876	33.7199	0.243264	1.35947	5e-05	0.00034525	yes
ENSG00000197381.14	ENSG00000197381.14	ADARB1	chr21:45070951-45226560	Prone	Prot	OK	7.5031	12.5255	0.739314	1.61414	5e-05	0.00034525	yes
ENSG00000197409.7	ENSG00000197409.7	HIST1H3D	chr6:26196839-26197250	Prone	Prot	OK	43.0476	61.3032	0.51003	1.86952	5e-05	0.00034525	yes
ENSG00000197442.9	ENSG00000197442.9	MAP3K5	chr6:136557046-136792518	Prone	Prot	OK	4.08756	6.12501	0.583471	2.29626	5e-05	0.00034525	yes
ENSG00000197457.8	ENSG00000197457.8	STMN3	chr20:63639704-63653427	Prone	Prot	OK	1.22776	2.208	0.846709	1.77523	5e-05	0.00034525	yes
ENSG00000197694.12	ENSG00000197694.12	SPTAN1	chr9:128552557-128656787	Prone	Prot	OK	64.8659	112.122	0.789541	1.75579	5e-05	0.00034525	yes
ENSG00000197696.8	ENSG00000197696.8	NMB	chr15:84655128-84658563	Prone	Prot	OK	4.16827	2.62672	-0.66619	-1.28558	5e-05	0.00034525	yes
ENSG00000197712.10	ENSG00000197712.10	FAM114A1	chr4:38867676-38945739	Prone	Prot	OK	43.6627	34.217	-0.351689	-1.12817	5e-05	0.00034525	yes
ENSG00000197714.7	ENSG00000197714.7	ZNF460	chr19:57267219-57294469	Prone	Prot	OK	9.35205	7.39834	-0.338082	-1.3934	5e-05	0.00034525	yes
ENSG00000197747.7	ENSG00000197747.7	S100A10	chr1:151982914-151994390	Prone	Prot	OK	134.259	255.475	0.928158	5.35103	5e-05	0.00034525	yes
ENSG00000197818.10	ENSG00000197818.10	SLC9A8	chr20:49812712-49892242	Prone	Prot	OK	2.9675	4.54004	0.613456	1.23393	5e-05	0.00034525	yes
ENSG00000197822.9	ENSG00000197822.9	OCLN	chr5:69477471-69558104	Prone	Prot	OK	4.52988	2.83515	-0.676049	-2.10951	5e-05	0.00034525	yes
ENSG00000197872.10	ENSG00000197872.10	FAM49A	chr2:16549458-16666331	Prone	Prot	OK	22.8411	13.3319	-0.776753	-3.22711	5e-05	0.00034525	yes
ENSG00000197903.7	ENSG00000197903.7	HIST1H2BK	chr6:27146417-27146798	Prone	Prot	OK	87.5852	107.04	0.289397	1.34366	5e-05	0.00034525	yes
ENSG00000197905.7	ENSG00000197905.7	TEAD4	chr12:2959329-3040673	Prone	Prot	OK	14.9741	25.2896	0.756076	2.67734	5e-05	0.00034525	yes
ENSG00000197927.11	ENSG00000197927.11	C2orf27A	chr2:131722374-131767404	Prone	Prot	OK	9.28776	6.09152	-0.608529	-1.34061	5e-05	0.00034525	yes
ENSG00000197930.11	ENSG00000197930.11	ERO1L	chr14:52639915-52695900	Prone	Prot	OK	42.8977	24.3943	-0.814358	-3.388	5e-05	0.00034525	yes
ENSG00000197943.8	ENSG00000197943.8	PLCG2	chr16:81738247-81962693	Prone	Prot	OK	11.9686	36.8212	1.62128	4.9658	5e-05	0.00034525	yes
ENSG00000197956.8	ENSG00000197956.8	S100A6	chr1:153533602-153536244	Prone	Prot	OK	1010.26	1903.21	0.913707	5.61785	5e-05	0.00034525	yes
ENSG00000197959.12	ENSG00000197959.12	DNM3	chr1:171841497-172468831	Prone	Prot	OK	1.03571	2.42105	1.22501	1.37636	5e-05	0.00034525	yes
ENSG00000197961.10	ENSG00000197961.10	ZNF121	chr19:9560352-9584533	Prone	Prot	OK	9.57789	7.89252	-0.279223	-1.18269	5e-05	0.00034525	yes
ENSG00000198053.10	ENSG00000198053.10	SIRPA	chr20:1888127-1940592	Prone	Prot	OK	14.8332	12.7627	-0.216899	-1.226	5e-05	0.00034525	yes
ENSG00000198075.8	ENSG00000198075.8	SULT1C4	chr2:108377910-108388057	Prone	Prot	OK	2.44081	1.03303	-1.24048	-2.563	5e-05	0.00034525	yes
ENSG00000198113.2	ENSG00000198113.2	TOR4A	chr9:137277748-137282641	Prone	Prot	OK	12.8208	17.1922	0.423269	2.17505	5e-05	0.00034525	yes
ENSG00000198171.11	ENSG00000198171.11	DDRGK1	chr20:3190349-3204685	Prone	Prot	OK	26.4592	31.0054	0.228749	1.10353	5e-05	0.00034525	yes
ENSG00000198208.10	ENSG00000198208.10	RPS6KL1	chr14:74903953-74923396	Prone	Prot	OK	6.99213	10.956	0.647918	1.3778	5e-05	0.00034525	yes
ENSG00000198355.4	ENSG00000198355.4	PIM3	chr22:49960512-49964080	Prone	Prot	OK	109.288	64.4482	-0.761918	-4.51983	5e-05	0.00034525	yes
ENSG00000198356.10	ENSG00000198356.10	ASNA1	chr19:12737138-12748323	Prone	Prot	OK	35.4873	41.8601	0.238275	1.30635	5e-05	0.00034525	yes
ENSG00000198435.3	ENSG00000198435.3	NRARP	chr9:137300481-137302251	Prone	Prot	OK	27.802	17.8828	-0.636615	-2.74837	5e-05	0.00034525	yes
ENSG00000198467.12	ENSG00000198467.12	TPM2	chr9:35681991-35691020	Prone	Prot	OK	30.2669	24.5664	-0.301057	-1.41264	5e-05	0.00034525	yes
ENSG00000198517.8	ENSG00000198517.8	MAFK	chr7:1530713-1560821	Prone	Prot	OK	13.9711	9.8179	-0.508955	-1.61527	5e-05	0.00034525	yes
ENSG00000198542.12	ENSG00000198542.12	ITGBL1	chr13:101452592-102402457	Prone	Prot	OK	5.02326	3.25421	-0.626315	-1.19405	5e-05	0.00034525	yes
ENSG00000198612.9	ENSG00000198612.9	COPS8	chr2:237059433-237100466	Prone	Prot	OK	63.664	83.237	0.386746	2.10368	5e-05	0.00034525	yes
ENSG00000198624.11	ENSG00000198624.11	CCDC69	chr5:151181051-151270440	Prone	Prot	OK	2.57263	14.2999	2.47469	4.45504	5e-05	0.00034525	yes
ENSG00000198682.11	ENSG00000198682.11	PAPSS2	chr10:87607984-87747705	Prone	Prot	OK	32.767	22.1292	-0.566294	-2.45012	5e-05	0.00034525	yes
ENSG00000198712.1	ENSG00000198712.1	MT-CO2	chrM:7585-8269	Prone	Prot	OK	213.135	286.365	0.42609	2.6459	5e-05	0.00034525	yes
ENSG00000198715.10	ENSG00000198715.10	GLMP	chr1:156282934-156295689	Prone	Prot	OK	71.7243	96.3843	0.426335	2.27608	5e-05	0.00034525	yes
ENSG00000198727.2	ENSG00000198727.2	MT-CYB	chrM:14746-15887	Prone	Prot	OK	41.1862	48.0836	0.223381	1.18438	5e-05	0.00034525	yes
ENSG00000198743.5	ENSG00000198743.5	SLC5A3	chr21:34073223-34360033	Prone	Prot	OK	4.43286	7.69683	0.796026	4.00929	5e-05	0.00034525	yes
ENSG00000198755.9	ENSG00000198755.9	RPL10A	chr6:35468407-35470785	Prone	Prot	OK	681.263	599.13	-0.185343	-1.17696	5e-05	0.00034525	yes
ENSG00000198768.9	ENSG00000198768.9	APCDD1L	chr20:58459100-58515131	Prone	Prot	OK	3.86918	1.90073	-1.02547	-2.15969	5e-05	0.00034525	yes
ENSG00000198774.4	ENSG00000198774.4	RASSF9	chr12:85800696-85836570	Prone	Prot	OK	0.866247	1.9102	1.14088	3.64032	5e-05	0.00034525	yes
ENSG00000198792.11	ENSG00000198792.11	TMEM184B	chr22:38219290-38273034	Prone	Prot	OK	23.037	30.7799	0.418033	1.94859	5e-05	0.00034525	yes
ENSG00000198804.2	ENSG00000198804.2	MT-CO1	chrM:5903-7445	Prone	Prot	OK	545.829	653.119	0.258898	1.56976	5e-05	0.00034525	yes
ENSG00000198805.10	ENSG00000198805.10	PNP	chr14:20468953-20477094	Prone	Prot	OK	78.1313	62.8882	-0.313111	-1.79766	5e-05	0.00034525	yes
ENSG00000198832.9	ENSG00000198832.9	SELM	chr22:31104771-31120069	Prone	Prot	OK	32.5724	40.3547	0.309087	1.21386	5e-05	0.00034525	yes
ENSG00000198837.8	ENSG00000198837.8	DENND4B	chr1:153929500-153946696	Prone	Prot	OK	11.5851	17.5335	0.597843	1.33267	5e-05	0.00034525	yes
ENSG00000198840.2	ENSG00000198840.2	MT-ND3	chrM:10058-10404	Prone	Prot	OK	193.842	267.679	0.465622	2.25976	5e-05	0.00034525	yes
ENSG00000198844.9	ENSG00000198844.9	ARHGEF15	chr17:8310240-8322516	Prone	Prot	OK	15.5618	23.6013	0.600862	1.42297	5e-05	0.00034525	yes
ENSG00000198853.10	ENSG00000198853.10	RUSC2	chr9:35490126-35563899	Prone	Prot	OK	6.41098	8.78091	0.453825	1.72323	5e-05	0.00034525	yes
ENSG00000198856.11	ENSG00000198856.11	OSTC	chr4:108650583-108667820	Prone	Prot	OK	144.697	117.288	-0.302972	-1.85385	5e-05	0.00034525	yes
ENSG00000198873.11	ENSG00000198873.11	GRK5	chr10:119207588-119459742	Prone	Prot	OK	32.0515	23.8643	-0.425541	-2.49377	5e-05	0.00034525	yes
ENSG00000198911.10	ENSG00000198911.10	SREBF2	chr22:41831214-41907308	Prone	Prot	OK	12.4603	16.9163	0.441073	1.51928	5e-05	0.00034525	yes
ENSG00000198938.2	ENSG00000198938.2	MT-CO3	chrM:8365-9990	Prone	Prot	OK	587.403	785.107	0.418538	2.57716	5e-05	0.00034525	yes
ENSG00000198947.13	ENSG00000198947.13	DMD	chrX:31097676-33339441	Prone	Prot	OK	4.8821	11.908	1.28636	2.09264	5e-05	0.00034525	yes
ENSG00000198951.10	ENSG00000198951.10	NAGA	chr22:41998724-42070842	Prone	Prot	OK	10.8475	15.5714	0.521531	2.43623	5e-05	0.00034525	yes
ENSG00000198959.10	ENSG00000198959.10	TGM2	chr20:38033545-38166578	Prone	Prot	OK	180.521	271.766	0.590198	2.92814	5e-05	0.00034525	yes
ENSG00000198961.8	ENSG00000198961.8	PJA2	chr5:109334708-109409994	Prone	Prot	OK	28.5996	24.7013	-0.211407	-1.2298	5e-05	0.00034525	yes
ENSG00000200795.1	ENSG00000200795.1	RNU4-1	chr12:120293096-120293237	Prone	Prot	OK	26520.7	21612.2	-0.295272	-1.83845	5e-05	0.00034525	yes
ENSG00000202538.1	ENSG00000202538.1	RNU4-2	chr12:120291762-120291903	Prone	Prot	OK	41462	33976	-0.287271	-1.81748	5e-05	0.00034525	yes
ENSG00000203485.11	ENSG00000203485.11	INF2	chr14:104689605-104722535	Prone	Prot	OK	16.8794	22.6172	0.422154	1.43855	5e-05	0.00034525	yes
ENSG00000203780.9	ENSG00000203780.9	FANK1	chr10:125896538-126009592	Prone	Prot	OK	2.27114	1.48549	-0.612477	-0.914465	5e-05	0.00034525	yes
ENSG00000204131.7	ENSG00000204131.7	NHSL2	chrX:72132149-72141362	Prone	Prot	OK	2.78412	4.16241	0.580198	2.2933	5e-05	0.00034525	yes
ENSG00000204136.9	ENSG00000204136.9	GGTA1P	chr9:121375240-121500027	Prone	Prot	OK	0.709105	1.21806	0.780515	1.1698	5e-05	0.00034525	yes
ENSG00000204138.11	ENSG00000204138.11	PHACTR4	chr1:28369602-28500369	Prone	Prot	OK	2.59131	4.07625	0.653561	2.17854	5e-05	0.00034525	yes
ENSG00000204161.12	ENSG00000204161.12	C10orf128	chr10:49154724-49188585	Prone	Prot	OK	7.47552	20.4577	1.45239	4.38023	5e-05	0.00034525	yes
ENSG00000204186.6	ENSG00000204186.6	ZDBF2	chr2:206274662-206314428	Prone	Prot	OK	5.96477	3.69451	-0.691085	-3.84498	5e-05	0.00034525	yes
ENSG00000204301.6	ENSG00000204301.6	NOTCH4	chr6:32190765-32224067	Prone	Prot	OK	52.2725	30.2537	-0.788943	-3.87007	5e-05	0.00034525	yes
ENSG00000204381.10	ENSG00000204381.10	LAYN	chr11:111540279-111561745	Prone	Prot	OK	3.50573	2.28004	-0.620656	-1.24314	5e-05	0.00034525	yes
ENSG00000204386.9	ENSG00000204386.9	NEU1	chr6:31857658-31862906	Prone	Prot	OK	47.6479	54.6172	0.196944	1.16662	5e-05	0.00034525	yes
ENSG00000204387.11	ENSG00000204387.11	C6orf48	chr6:31834607-31839766	Prone	Prot	OK	99.9803	86.3729	-0.211064	-1.15415	5e-05	0.00034525	yes
ENSG00000204388.6	ENSG00000204388.6	HSPA1B	chr6:31827734-31830255	Prone	Prot	OK	4.17739	7.2045	0.786297	3.16424	5e-05	0.00034525	yes
ENSG00000204389.9	ENSG00000204389.9	HSPA1A	chr6:31815463-31817946	Prone	Prot	OK	5.7648	9.44147	0.711741	2.9089	5e-05	0.00034525	yes
ENSG00000204442.3	ENSG00000204442.3	FAM155A	chr13:107163509-107866735	Prone	Prot	OK	0.881698	1.28968	0.548655	1.97466	5e-05	0.00034525	yes
ENSG00000204580.10	ENSG00000204580.10	DDR1	chr6:30876420-30900156	Prone	Prot	OK	21.2429	13.3116	-0.674293	-1.5336	5e-05	0.00034525	yes
ENSG00000204592.8	ENSG00000204592.8	HLA-E	chr6:30489466-30494205	Prone	Prot	OK	231.844	279.853	0.271514	1.353	5e-05	0.00034525	yes
ENSG00000204899.5	ENSG00000204899.5	MZT1	chr13:72708356-72727687	Prone	Prot	OK	14.3266	11.9356	-0.263425	-1.27948	5e-05	0.00034525	yes
ENSG00000205133.10	ENSG00000205133.10	TRIQK	chr8:92882983-93017673	Prone	Prot	OK	13.5167	10.3872	-0.379939	-1.32888	5e-05	0.00034525	yes
ENSG00000205213.12	ENSG00000205213.12	LGR4	chr11:27365960-27482433	Prone	Prot	OK	5.69233	8.00111	0.491179	1.51576	5e-05	0.00034525	yes
ENSG00000205336.10	ENSG00000205336.10	GPR56	chr16:57610651-57665580	Prone	Prot	OK	22.0319	34.1665	0.632985	1.91477	5e-05	0.00034525	yes
ENSG00000205413.6	ENSG00000205413.6	SAMD9	chr7:93099512-93118023	Prone	Prot	OK	5.60741	6.53154	0.220089	1.23348	5e-05	0.00034525	yes
ENSG00000205476.7	ENSG00000205476.7	CCDC85C	chr14:99481168-99604026	Prone	Prot	OK	12.9224	6.52563	-0.985682	-1.74771	5e-05	0.00034525	yes
ENSG00000206195.9	ENSG00000206195.9	DUXAP8	chr22:15784958-15829984	Prone	Prot	OK	5.37438	2.99812	-0.842041	-1.39887	5e-05	0.00034525	yes
ENSG00000206503.10	ENSG00000206503.10	HLA-A	chr6:29941259-29945884	Prone	Prot	OK	214.336	184.961	-0.212647	-1.27222	5e-05	0.00034525	yes
ENSG00000206560.9	ENSG00000206560.9	ANKRD28	chr3:15667235-15859771	Prone	Prot	OK	68.2439	84.7377	0.312304	1.23954	5e-05	0.00034525	yes
ENSG00000206585.1	ENSG00000206585.1	RNVU1-7	chr1:148038752-148038916	Prone	Prot	OK	626.259	463.061	-0.435558	-1.62007	5e-05	0.00034525	yes
ENSG00000210082.2	ENSG00000210082.2	MT-RNR2	chrM:1670-3229	Prone	Prot	OK	962.531	293.516	-1.71339	-7.95554	5e-05	0.00034525	yes
ENSG00000211459.2	ENSG00000211459.2	MT-RNR1	chrM:647-1601	Prone	Prot	OK	456.906	127.355	-1.84304	-10.1873	5e-05	0.00034525	yes
ENSG00000211584.12	ENSG00000211584.12	SLC48A1	chr12:47706084-47837898	Prone	Prot	OK	9.7426	18.7295	0.942931	1.54165	5e-05	0.00034525	yes
ENSG00000211772.7	ENSG00000211772.7	TRBC2	chr7:142670739-142802748	Prone	Prot	OK	5.78233	3.80014	-0.605599	-1.24759	5e-05	0.00034525	yes
ENSG00000213160.8	ENSG00000213160.8	KLHL23	chr2:169694453-169776989	Prone	Prot	OK	4.36459	2.36049	-0.886758	-1.40788	5e-05	0.00034525	yes
ENSG00000213203.2	ENSG00000213203.2	GIMAP1	chr7:150716556-150750094	Prone	Prot	OK	13.9394	16.939	0.281185	1.14135	5e-05	0.00034525	yes
ENSG00000213222.3	ENSG00000213222.3	AC093724.2	chr2:131722374-131767404	Prone	Prot	OK	7.3801	4.13247	-0.836637	-1.80263	5e-05	0.00034525	yes
ENSG00000213281.4	ENSG00000213281.4	NRAS	chr1:114704468-114716894	Prone	Prot	OK	32.2003	27.2818	-0.239137	-1.4988	5e-05	0.00034525	yes
ENSG00000213316.8	ENSG00000213316.8	LTC4S	chr5:179732849-179796647	Prone	Prot	OK	0.859159	3.85878	2.16715	1.11301	5e-05	0.00034525	yes
ENSG00000213445.7	ENSG00000213445.7	SIPA1	chr11:65576037-65650930	Prone	Prot	OK	27.4827	37.2097	0.437157	0.924498	5e-05	0.00034525	yes
ENSG00000213585.9	ENSG00000213585.9	VDAC1	chr5:133971914-134005133	Prone	Prot	OK	92.4178	77.1125	-0.261206	-1.63738	5e-05	0.00034525	yes
ENSG00000213689.8	ENSG00000213689.8	TREX1	chr3:48446709-48467645	Prone	Prot	OK	7.06465	11.6882	0.726365	1.31106	5e-05	0.00034525	yes
ENSG00000213699.7	ENSG00000213699.7	SLC35F6	chr2:26764283-26801067	Prone	Prot	OK	9.52229	15.3763	0.691329	2.85175	5e-05	0.00034525	yes
ENSG00000213853.8	ENSG00000213853.8	EMP2	chr16:10528421-10580698	Prone	Prot	OK	17.2802	10.9082	-0.663707	-1.71639	5e-05	0.00034525	yes
ENSG00000213923.9	ENSG00000213923.9	CSNK1E	chr22:38290690-38398929	Prone	Prot	OK	80.4955	59.129	-0.445043	-1.90871	5e-05	0.00034525	yes
ENSG00000214176.8	ENSG00000214176.8	PLEKHM1P	chr17:64749662-64837154	Prone	Prot	OK	6.3409	9.22526	0.540901	1.80857	5e-05	0.00034525	yes
ENSG00000214194.7	ENSG00000214194.7	LINC00998	chr7:113100662-113146330	Prone	Prot	OK	34.5869	40.2822	0.219917	1.14848	5e-05	0.00034525	yes
ENSG00000214548.13	ENSG00000214548.13	MEG3	chr14:100779409-100861031	Prone	Prot	OK	2.11598	1.28569	-0.71879	-0.714298	5e-05	0.00034525	yes
ENSG00000214944.8	ENSG00000214944.8	ARHGEF28	chr5:73626157-73941993	Prone	Prot	OK	41.1534	24.7949	-0.730969	-2.47536	5e-05	0.00034525	yes
ENSG00000215183.4	ENSG00000215183.4	MSMP	chr9:35749286-35758575	Prone	Prot	OK	11.7105	5.90757	-0.987164	-1.32282	5e-05	0.00034525	yes
ENSG00000215417.9	ENSG00000215417.9	MIR17HG	chr13:91347819-91354579	Prone	Prot	OK	4.93418	2.89614	-0.768676	-2.11679	5e-05	0.00034525	yes
ENSG00000215769.7	ENSG00000215769.7	RP13-104F24.2	chr17:64749662-64837154	Prone	Prot	OK	9.61059	14.3302	0.576364	1.50999	5e-05	0.00034525	yes
ENSG00000216775.2	ENSG00000216775.2	RP1-152L7.5	chr6:52665147-52669155	Prone	Prot	OK	1.01774	1.84061	0.854818	1.21477	5e-05	0.00034525	yes
ENSG00000218537.1	ENSG00000218537.1	MIF-AS1	chr22:23856426-23898930	Prone	Prot	OK	25.2454	18.8487	-0.42155	-1.54592	5e-05	0.00034525	yes
ENSG00000220785.6	ENSG00000220785.6	MTMR9LP	chr1:32231657-32241620	Prone	Prot	OK	26.4228	39.9832	0.597608	3.14427	5e-05	0.00034525	yes
ENSG00000221866.8	ENSG00000221866.8	PLXNA4	chr7:132123331-132648688	Prone	Prot	OK	1.35736	1.99353	0.554522	1.15212	5e-05	0.00034525	yes
ENSG00000221963.5	ENSG00000221963.5	APOL6	chr22:35648394-35668409	Prone	Prot	OK	1.6522	2.77918	0.750267	3.53053	5e-05	0.00034525	yes
ENSG00000222041.9	ENSG00000222041.9	LINC00152	chr2:87439522-87606805	Prone	Prot	OK	75.0686	52.7851	-0.508078	-2.20739	5e-05	0.00034525	yes
ENSG00000223361.5	ENSG00000223361.5	FTH1P10	chr5:17353694-17354899	Prone	Prot	OK	1.10424	1.96888	0.834321	1.25993	5e-05	0.00034525	yes
ENSG00000223749.6	ENSG00000223749.6	MIR503HG	chrX:134543336-134546721	Prone	Prot	OK	5.26081	2.64414	-0.992489	-1.51327	5e-05	0.00034525	yes
ENSG00000223802.6	ENSG00000223802.6	CERS1	chr19:18868544-18896727	Prone	Prot	OK	3.04225	1.55653	-0.966801	-1.58006	5e-05	0.00034525	yes
ENSG00000224051.5	ENSG00000224051.5	CPTP	chr1:1324755-1328897	Prone	Prot	OK	10.2248	13.4868	0.399477	1.61284	5e-05	0.00034525	yes
ENSG00000225190.7	ENSG00000225190.7	PLEKHM1	chr17:45435899-45490749	Prone	Prot	OK	14.8652	24.3112	0.709679	1.66791	5e-05	0.00034525	yes
ENSG00000225210.4	ENSG00000225210.4	DUXAP10	chr14:19062315-19115270	Prone	Prot	OK	2.7995	1.74256	-0.683964	-1.09717	5e-05	0.00034525	yes
ENSG00000225269.2	ENSG00000225269.2	LINC00705	chr10:4650184-4678154	Prone	Prot	OK	4.78337	3.01729	-0.664771	-1.43843	5e-05	0.00034525	yes
ENSG00000225614.2	ENSG00000225614.2	ZNF469	chr16:88427470-88440757	Prone	Prot	OK	1.02004	0.712476	-0.517714	-1.85766	5e-05	0.00034525	yes
ENSG00000225968.6	ENSG00000225968.6	ELFN1	chr7:1688118-1747954	Prone	Prot	OK	0.646748	1.01102	0.644536	1.16744	5e-05	0.00034525	yes
ENSG00000226239.1	ENSG00000226239.1	RP1-310O13.7	chr20:32010449-32032180	Prone	Prot	OK	1.9659	6.55849	1.73817	2.70119	5e-05	0.00034525	yes
ENSG00000226564.1	ENSG00000226564.1	FTH1P20	chr2:180571711-180916939	Prone	Prot	OK	1.62697	2.8656	0.816653	1.17176	5e-05	0.00034525	yes
ENSG00000226674.7	ENSG00000226674.7	TEX41	chr2:144667966-145262988	Prone	Prot	OK	0.749787	3.25449	2.11788	0.508143	5e-05	0.00034525	yes
ENSG00000226937.8	ENSG00000226937.8	CEP164P1	chr10:44997697-45181427	Prone	Prot	OK	13.2827	9.9207	-0.421037	-1.40712	5e-05	0.00034525	yes
ENSG00000226950.5	ENSG00000226950.5	DANCR	chr4:52712403-52720831	Prone	Prot	OK	34.4694	25.7095	-0.423019	-1.63731	5e-05	0.00034525	yes
ENSG00000226958.1	ENSG00000226958.1	CTD-2328D6.1	chrX:109054130-109054590	Prone	Prot	OK	3854.35	917.952	-2.07	-10.7213	5e-05	0.00034525	yes
ENSG00000227195.7	ENSG00000227195.7	MIR663AHG	chr20:26186919-26251526	Prone	Prot	OK	2.78486	4.16725	0.581492	0.737534	5e-05	0.00034525	yes
ENSG00000227695.4	ENSG00000227695.4	DNMBP-AS1	chr10:99875576-100009919	Prone	Prot	OK	3.42069	1.62091	-1.07748	-1.18113	5e-05	0.00034525	yes
ENSG00000227764.1	ENSG00000227764.1	RP11-354K1.1	chr1:211635905-211654581	Prone	Prot	OK	1.53344	0.375044	-2.03165	-1.36817	5e-05	0.00034525	yes
ENSG00000228157.4	ENSG00000228157.4	AC007952.5	chr17:19092973-19096837	Prone	Prot	OK	3.43711	1.77851	-0.950527	-2.31452	5e-05	0.00034525	yes
ENSG00000228495.1	ENSG00000228495.1	LINC01013	chr6:132131914-132169374	Prone	Prot	OK	40.8365	20.3772	-1.0029	-4.10185	5e-05	0.00034525	yes
ENSG00000228672.3	ENSG00000228672.3	PROB1	chr5:139390591-139395713	Prone	Prot	OK	1.72805	1.22968	-0.490861	-1.35438	5e-05	0.00034525	yes
ENSG00000229308.1	ENSG00000229308.1	AC010084.1	chrY:4036496-4100320	Prone	Prot	OK	22.3216	16.2288	-0.459888	-1.52076	5e-05	0.00034525	yes
ENSG00000229644.6	ENSG00000229644.6	NAMPTP1	chr10:36521720-36524234	Prone	Prot	OK	7.30382	4.89567	-0.577146	-2.49476	5e-05	0.00034525	yes
ENSG00000230479.1	ENSG00000230479.1	AP000695.6	chr21:36430359-36576569	Prone	Prot	OK	19.9198	12.7024	-0.649103	-1.8587	5e-05	0.00034525	yes
ENSG00000231252.1	ENSG00000231252.1	RP11-436K8.1	chr1:60659630-60825584	Prone	Prot	OK	1.74308	0.995968	-0.807467	-1.90691	5e-05	0.00034525	yes
ENSG00000231290.4	ENSG00000231290.4	APCDD1L-AS1	chr20:58515378-58619888	Prone	Prot	OK	1.77844	0.659778	-1.43056	-1.1282	5e-05	0.00034525	yes
ENSG00000231298.5	ENSG00000231298.5	LINC00704	chr10:4650184-4678154	Prone	Prot	OK	19.4661	12.9104	-0.592432	-2.27222	5e-05	0.00034525	yes
ENSG00000231925.10	ENSG00000231925.10	TAPBP	chr6:33299693-33314387	Prone	Prot	OK	35.8247	50.3255	0.490336	2.47869	5e-05	0.00034525	yes
ENSG00000232533.1	ENSG00000232533.1	AC093673.5	chr7:143379691-143380495	Prone	Prot	OK	5.37693	3.23075	-0.734914	-1.46229	5e-05	0.00034525	yes
ENSG00000233237.5	ENSG00000233237.5	LINC00472	chr6:71221456-71420769	Prone	Prot	OK	5.04363	8.40198	0.736267	1.32183	5e-05	0.00034525	yes
ENSG00000233276.3	ENSG00000233276.3	GPX1	chr3:49357175-49358600	Prone	Prot	OK	333.837	245.587	-0.442909	-2.80093	5e-05	0.00034525	yes
ENSG00000233461.4	ENSG00000233461.4	RP11-295G20.2	chr1:231522387-231528556	Prone	Prot	OK	4.79745	2.31841	-1.04913	-1.47224	5e-05	0.00034525	yes
ENSG00000233818.1	ENSG00000233818.1	AP000695.4	chr21:36430359-36576569	Prone	Prot	OK	13.3186	8.9089	-0.580128	-1.23297	5e-05	0.00034525	yes
ENSG00000234231.3	ENSG00000234231.3	AC093616.4	chr2:87700983-87738105	Prone	Prot	OK	1.93194	1.33813	-0.529832	-1.24358	5e-05	0.00034525	yes
ENSG00000234741.6	ENSG00000234741.6	GAS5	chr1:173863247-173903549	Prone	Prot	OK	215.006	180.184	-0.254908	-1.32632	5e-05	0.00034525	yes
ENSG00000234883.3	ENSG00000234883.3	MIR155HG	chr21:25561908-25575168	Prone	Prot	OK	2.5986	1.71791	-0.597083	-1.35782	5e-05	0.00034525	yes
ENSG00000235387.1	ENSG00000235387.1	LINC00961	chr9:35909482-35911686	Prone	Prot	OK	1.76184	2.82154	0.679399	1.60637	5e-05	0.00034525	yes
ENSG00000235750.8	ENSG00000235750.8	KIAA0040	chr1:175156986-175192999	Prone	Prot	OK	11.6021	5.548	-1.06435	-3.21978	5e-05	0.00034525	yes
ENSG00000235770.4	ENSG00000235770.4	LINC00607	chr2:215530446-215843722	Prone	Prot	OK	64.389	42.7722	-0.590141	-2.24936	5e-05	0.00034525	yes
ENSG00000237649.6	ENSG00000237649.6	KIFC1	chr6:33391535-33409924	Prone	Prot	OK	2.86822	3.98622	0.474866	1.19729	5e-05	0.00034525	yes
ENSG00000239264.7	ENSG00000239264.7	TXNDC5	chr6:7726796-8102578	Prone	Prot	OK	548.822	214.601	-1.35468	-5.59687	5e-05	0.00034525	yes
ENSG00000239282.6	ENSG00000239282.6	GATSL3	chr22:30285116-30327046	Prone	Prot	OK	8.30248	16.0824	0.953864	1.92297	5e-05	0.00034525	yes
ENSG00000240184.5	ENSG00000240184.5	PCDHGC3	chr5:141330570-141512981	Prone	Prot	OK	2.80904	5.2752	0.909151	1.2275	5e-05	0.00034525	yes
ENSG00000240583.9	ENSG00000240583.9	AQP1	chr7:30651942-30925516	Prone	Prot	OK	63.7242	95.1341	0.578122	2.74978	5e-05	0.00034525	yes
ENSG00000240694.7	ENSG00000240694.7	PNMA2	chr8:26379258-26514092	Prone	Prot	OK	5.12344	2.46311	-1.05663	-1.31401	5e-05	0.00034525	yes
ENSG00000240771.5	ENSG00000240771.5	ARHGEF25	chr12:57610179-57633355	Prone	Prot	OK	2.83867	1.65358	-0.779619	-1.0628	5e-05	0.00034525	yes
ENSG00000240849.9	ENSG00000240849.9	TMEM189	chr20:50081123-50153734	Prone	Prot	OK	25.6134	34.66	0.436374	1.79185	5e-05	0.00034525	yes
ENSG00000241697.4	ENSG00000241697.4	TMEFF1	chr9:100427155-100577636	Prone	Prot	OK	7.22167	3.75606	-0.943112	-1.30695	5e-05	0.00034525	yes
ENSG00000241839.8	ENSG00000241839.8	PLEKHO2	chr15:64841882-64958700	Prone	Prot	OK	11.745	17.5908	0.582773	3.15692	5e-05	0.00034525	yes
ENSG00000241852.8	ENSG00000241852.8	C8orf58	chr8:22578278-22604150	Prone	Prot	OK	19.0573	11.2184	-0.764474	-2.15928	5e-05	0.00034525	yes
ENSG00000242802.5	ENSG00000242802.5	AP5Z1	chr7:4775621-4794312	Prone	Prot	OK	16.6795	21.2685	0.350647	1.42238	5e-05	0.00034525	yes
ENSG00000243364.6	ENSG00000243364.6	EFNA4	chr1:155063730-155087538	Prone	Prot	OK	6.16739	4.06813	-0.600293	-1.44311	5e-05	0.00034525	yes
ENSG00000244405.6	ENSG00000244405.6	ETV5	chr3:186046307-186362237	Prone	Prot	OK	13.5359	7.51854	-0.848267	-1.75807	5e-05	0.00034525	yes
ENSG00000246705.4	ENSG00000246705.4	H2AFJ	chr12:14774382-14778002	Prone	Prot	OK	38.548	49.2263	0.352773	1.51789	5e-05	0.00034525	yes
ENSG00000247095.2	ENSG00000247095.2	MIR210HG	chr11:565659-568457	Prone	Prot	OK	9.82864	1.33748	-2.87748	-3.02469	5e-05	0.00034525	yes
ENSG00000248124.6	ENSG00000248124.6	RRN3P1	chr16:21796105-21820410	Prone	Prot	OK	6.19983	4.44412	-0.480333	-1.42309	5e-05	0.00034525	yes
ENSG00000248334.5	ENSG00000248334.5	WHAMMP2	chr15:28701953-28759204	Prone	Prot	OK	2.84146	1.84683	-0.621584	-2.17589	5e-05	0.00034525	yes
ENSG00000249751.3	ENSG00000249751.3	ECSCR	chr5:139408587-139462743	Prone	Prot	OK	189.521	241.359	0.348825	2.13094	5e-05	0.00034525	yes
ENSG00000249992.1	ENSG00000249992.1	TMEM158	chr3:45224465-45226278	Prone	Prot	OK	1.13929	0.284531	-2.00148	-1.67365	5e-05	0.00034525	yes
ENSG00000250510.6	ENSG00000250510.6	GPR162	chr12:6821544-6839851	Prone	Prot	OK	7.95569	13.6585	0.779742	1.50938	5e-05	0.00034525	yes
ENSG00000250899.3	ENSG00000250899.3	RP11-253E3.3	chr12:3041436-3044950	Prone	Prot	OK	1.27097	2.50245	0.977405	2.8865	5e-05	0.00034525	yes
ENSG00000251349.3	ENSG00000251349.3	MSANTD3-TMEFF1	chr9:100427155-100577636	Prone	Prot	OK	10.7961	5.85098	-0.883761	-1.79076	5e-05	0.00034525	yes
ENSG00000253190.3	ENSG00000253190.3	AC084082.3	chr8:66112666-66115207	Prone	Prot	OK	3.5211	1.63091	-1.11035	-2.11145	5e-05	0.00034525	yes
ENSG00000253276.2	ENSG00000253276.2	CCDC71L	chr7:106372250-106770207	Prone	Prot	OK	57.4831	46.6608	-0.300926	-1.40615	5e-05	0.00034525	yes
ENSG00000253368.3	ENSG00000253368.3	TRNP1	chr1:26993706-27000898	Prone	Prot	OK	5.18215	8.75636	0.75678	2.01545	5e-05	0.00034525	yes
ENSG00000253719.3	ENSG00000253719.3	ATXN7L3B	chr12:74537826-74545430	Prone	Prot	OK	9.60941	8.32099	-0.207693	-1.19303	5e-05	0.00034525	yes
ENSG00000254087.6	ENSG00000254087.6	LYN	chr8:55879812-56014168	Prone	Prot	OK	8.89065	14.175	0.672985	3.07017	5e-05	0.00034525	yes
ENSG00000254122.2	ENSG00000254122.2	PCDHGB7	chr5:141330570-141512981	Prone	Prot	OK	3.00797	4.71836	0.649498	1.28554	5e-05	0.00034525	yes
ENSG00000254726.2	ENSG00000254726.2	MEX3A	chr1:156072012-156081998	Prone	Prot	OK	2.21283	1.12668	-0.973817	-1.62409	5e-05	0.00034525	yes
ENSG00000254838.5	ENSG00000254838.5	GVINP1	chr11:6713535-6746439	Prone	Prot	OK	1.2116	0.656943	-0.883075	-3.22058	5e-05	0.00034525	yes
ENSG00000255874.2	ENSG00000255874.2	LINC00346	chr13:110863986-110870251	Prone	Prot	OK	0.616174	1.24752	1.01765	3.06155	5e-05	0.00034525	yes
ENSG00000256235.1	ENSG00000256235.1	SMIM3	chr5:150777945-150796734	Prone	Prot	OK	3.81464	1.39466	-1.45163	-3.83074	5e-05	0.00034525	yes
ENSG00000256546.1	ENSG00000256546.1	AC156455.1	chr12:122063305-122068616	Prone	Prot	OK	2.31888	0.931885	-1.31521	-1.27707	5e-05	0.00034525	yes
ENSG00000257093.5	ENSG00000257093.5	KIAA1147	chr7:141529202-141702153	Prone	Prot	OK	35.504	23.5936	-0.589586	-3.28096	5e-05	0.00034525	yes
ENSG00000257207.5	ENSG00000257207.5	AC108938.5	chr2:110386376-110473075	Prone	Prot	OK	3.15335	1.97637	-0.674037	-2.24321	5e-05	0.00034525	yes
ENSG00000257225.1	ENSG00000257225.1	RP11-328C8.4	chr12:42238446-42590355	Prone	Prot	OK	2.92341	8.34901	1.51395	2.97709	5e-05	0.00034525	yes
ENSG00000257594.3	ENSG00000257594.3	GALNT4	chr12:89419717-89548005	Prone	Prot	OK	8.1962	6.00152	-0.449628	-1.53945	5e-05	0.00034525	yes
ENSG00000258749.1	ENSG00000258749.1	RP11-688G15.3	chr14:99481168-99604026	Prone	Prot	OK	8.45924	4.69337	-0.849905	-1.39687	5e-05	0.00034525	yes
ENSG00000258791.6	ENSG00000258791.6	LINC00520	chr14:55781134-55796688	Prone	Prot	OK	2.04085	5.85284	1.51997	1.9592	5e-05	0.00034525	yes
ENSG00000259040.4	ENSG00000259040.4	BLOC1S5-TXNDC5	chr6:7726796-8102578	Prone	Prot	OK	133.493	77.482	-0.784835	-1.75744	5e-05	0.00034525	yes
ENSG00000259207.6	ENSG00000259207.6	ITGB3	chr17:47253845-47441312	Prone	Prot	OK	16.8052	8.79533	-0.934099	-3.95591	5e-05	0.00034525	yes
ENSG00000259460.1	ENSG00000259460.1	RP11-128A17.1	chr15:36889203-37101299	Prone	Prot	OK	7.39928	17.0833	1.20713	1.30136	5e-05	0.00034525	yes
ENSG00000259498.1	ENSG00000259498.1	RP11-244F12.3	chr15:63042631-63071915	Prone	Prot	OK	4.56855	1.7753	-1.36367	-1.54467	5e-05	0.00034525	yes
ENSG00000259627.1	ENSG00000259627.1	RP11-244F12.2	chr15:63042631-63071915	Prone	Prot	OK	35.7949	13.78	-1.37717	-2.18507	5e-05	0.00034525	yes
ENSG00000259932.1	ENSG00000259932.1	CTD-2651B20.7	chr15:45092649-45201175	Prone	Prot	OK	9.29545	4.57294	-1.0234	-1.75076	5e-05	0.00034525	yes
ENSG00000260032.1	ENSG00000260032.1	LINC00657	chr20:36045621-36050960	Prone	Prot	OK	148.102	117.262	-0.336858	-2.10294	5e-05	0.00034525	yes
ENSG00000260604.2	ENSG00000260604.2	RP1-140K8.5	chr6:3904919-3911979	Prone	Prot	OK	1.07194	0.433357	-1.3066	-3.6121	5e-05	0.00034525	yes
ENSG00000260804.3	ENSG00000260804.3	PKI55	chr2:216217044-216220192	Prone	Prot	OK	1.06827	1.48472	0.474912	1.17227	5e-05	0.00034525	yes
ENSG00000260822.1	ENSG00000260822.1	GS1-358P8.4	chrX:24545515-24550466	Prone	Prot	OK	1.40613	1.07139	-0.392248	-1.21003	5e-05	0.00034525	yes
ENSG00000260908.1	ENSG00000260908.1	CTB-134H23.3	chr16:29053731-29220031	Prone	Prot	OK	6.27139	0.241078	-4.70121	-0.969204	5e-05	0.00034525	yes
ENSG00000260912.1	ENSG00000260912.1	RP11-363E7.4	chr9:19453208-19455173	Prone	Prot	OK	11.075	3.74471	-1.56438	-5.68443	5e-05	0.00034525	yes
ENSG00000261051.1	ENSG00000261051.1	RP11-274H2.5	chr3:146059584-146061679	Prone	Prot	OK	2.06101	0.788481	-1.38621	-2.77381	5e-05	0.00034525	yes
ENSG00000261175.4	ENSG00000261175.4	CTD-2015G9.2	chr16:86722090-86741059	Prone	Prot	OK	1.06694	0.522484	-1.03002	-1.4556	5e-05	0.00034525	yes
ENSG00000261269.1	ENSG00000261269.1	RP11-389C8.2	chr5:72439902-72442387	Prone	Prot	OK	1.23184	3.68564	1.5811	4.29578	5e-05	0.00034525	yes
ENSG00000261295.1	ENSG00000261295.1	RP11-524D16__A.3	chrX:100673329-100673981	Prone	Prot	OK	7.47886	3.5714	-1.06633	-2.20211	5e-05	0.00034525	yes
ENSG00000261586.2	ENSG00000261586.2	RP11-923I11.6	chr12:51817888-51820150	Prone	Prot	OK	0.579887	1.17868	1.02333	1.81541	5e-05	0.00034525	yes
ENSG00000261602.1	ENSG00000261602.1	CTD-2033A16.1	chr16:69706995-69726951	Prone	Prot	OK	19.6586	44.9863	1.19433	1.32553	5e-05	0.00034525	yes
ENSG00000261609.3	ENSG00000261609.3	GAN	chr16:81314951-81390884	Prone	Prot	OK	3.1381	2.38896	-0.393509	-1.05713	5e-05	0.00034525	yes
ENSG00000261641.2	ENSG00000261641.2	LA16c-390E6.5	chr16:1444933-1475580	Prone	Prot	OK	18.7678	29.1656	0.636013	1.46203	5e-05	0.00034525	yes
ENSG00000261740.4	ENSG00000261740.4	RP11-345J4.5	chr16:29425799-29467833	Prone	Prot	OK	6.59623	4.85905	-0.440968	-1.24754	5e-05	0.00034525	yes
ENSG00000262074.5	ENSG00000262074.5	SNORD3B-2	chr17:19063345-19064136	Prone	Prot	OK	7.13914	4.28928	-0.735017	-1.37287	5e-05	0.00034525	yes
ENSG00000262202.4	ENSG00000262202.4	RP11-160E2.6	chr17:19111999-19112636	Prone	Prot	OK	15.8695	9.96699	-0.671028	-1.58604	5e-05	0.00034525	yes
ENSG00000262292.2	ENSG00000262292.2	RP11-160E2.11	chr17:19160788-19162274	Prone	Prot	OK	1.68041	0.907282	-0.889186	-1.59961	5e-05	0.00034525	yes
ENSG00000262319.1	ENSG00000262319.1	CTC-457L16.2	chr17:19127468-19159176	Prone	Prot	OK	1.84475	0.9182	-1.00654	-1.93272	5e-05	0.00034525	yes
ENSG00000263394.1	ENSG00000263394.1	RP11-160E2.19	chr17:19091068-19091825	Prone	Prot	OK	3.79688	1.66234	-1.1916	-1.90694	5e-05	0.00034525	yes
ENSG00000263465.3	ENSG00000263465.3	SRSF8	chr11:95067196-95071224	Prone	Prot	OK	8.8964	11.5656	0.378548	2.0123	5e-05	0.00034525	yes
ENSG00000263585.1	ENSG00000263585.1	RP11-498C9.13	chr17:81932383-81947601	Prone	Prot	OK	9.62519	5.38952	-0.836657	-1.20439	5e-05	0.00034525	yes
ENSG00000265681.5	ENSG00000265681.5	RPL17	chr18:49477249-49492565	Prone	Prot	OK	876.372	744.572	-0.235131	-1.35709	5e-05	0.00034525	yes
ENSG00000265808.3	ENSG00000265808.3	SEC22B	chr1:120150897-120176515	Prone	Prot	OK	14.6127	12.627	-0.210708	-1.08357	5e-05	0.00034525	yes
ENSG00000265972.4	ENSG00000265972.4	TXNIP	chr1:145992434-145996600	Prone	Prot	OK	37.5725	24.0061	-0.646277	-3.65675	5e-05	0.00034525	yes
ENSG00000266208.1	ENSG00000266208.1	CTD-2267D19.3	chr17:40360654-40364693	Prone	Prot	OK	3.00696	4.47707	0.574251	1.55706	5e-05	0.00034525	yes
ENSG00000266472.4	ENSG00000266472.4	MRPS21	chr1:150293719-150308979	Prone	Prot	OK	33.6227	26.1474	-0.362767	-1.84185	5e-05	0.00034525	yes
ENSG00000267100.1	ENSG00000267100.1	ILF3-AS1	chr19:10651861-10653844	Prone	Prot	OK	1.25288	2.23979	0.838112	1.91207	5e-05	0.00034525	yes
ENSG00000267583.4	ENSG00000267583.4	RP11-322E11.5	chr18:35443868-35497991	Prone	Prot	OK	77.3108	50.708	-0.608456	-2.1794	5e-05	0.00034525	yes
ENSG00000267598.1	ENSG00000267598.1	CTC-250I14.6	chr19:13150414-13154908	Prone	Prot	OK	18.0069	30.0793	0.740222	1.39367	5e-05	0.00034525	yes
ENSG00000267801.1	ENSG00000267801.1	RP11-552F3.9	chr17:75874160-75879546	Prone	Prot	OK	2.2297	4.54835	1.02849	1.77859	5e-05	0.00034525	yes
ENSG00000268858.2	ENSG00000268858.2	RP4-591C20.9	chr20:63861211-63864293	Prone	Prot	OK	0.888872	1.38599	0.64087	1.19927	5e-05	0.00034525	yes
ENSG00000269858.4	ENSG00000269858.4	EGLN2	chr19:40771647-40900508	Prone	Prot	OK	60.1733	75.6073	0.329404	1.47065	5e-05	0.00034525	yes
ENSG00000269893.5	ENSG00000269893.5	SNHG8	chr4:118278708-118279823	Prone	Prot	OK	88.0076	68.708	-0.357149	-1.39079	5e-05	0.00034525	yes
ENSG00000269926.1	ENSG00000269926.1	RP11-442H21.2	chr10:72273919-72276036	Prone	Prot	OK	95.0991	168.247	0.823081	3.45926	5e-05	0.00034525	yes
ENSG00000270055.1	ENSG00000270055.1	CTD-3092A11.2	chr15:30470778-30507623	Prone	Prot	OK	9.56337	5.04487	-0.922701	-3.65819	5e-05	0.00034525	yes
ENSG00000270547.4	ENSG00000270547.4	LINC01235	chr9:13406379-13433053	Prone	Prot	OK	4.2227	1.27719	-1.72519	-1.68684	5e-05	0.00034525	yes
ENSG00000271303.1	ENSG00000271303.1	SRXN1	chr20:646614-676179	Prone	Prot	OK	11.1904	14.1011	0.333551	1.69492	5e-05	0.00034525	yes
ENSG00000271897.1	ENSG00000271897.1	RP11-679B17.2	chr6:11607551-11607981	Prone	Prot	OK	3.08202	1.23307	-1.32162	-1.36212	5e-05	0.00034525	yes
ENSG00000272168.4	ENSG00000272168.4	CASC15	chr6:21664771-22214505	Prone	Prot	OK	12.253	6.13965	-0.996905	-3.77145	5e-05	0.00034525	yes
ENSG00000273015.2	ENSG00000273015.2	RP11-352M15.2	chr12:45718045-45727775	Prone	Prot	OK	1.1907	1.49356	0.326948	1.28159	5e-05	0.00034525	yes
[truncated: 58,469 more rows]

## Sheet: all DEGs
test_id	gene_id	gene	locus	sample_1	sample_2	status	value_1	value_2	log2(fold_change)	test_stat	p_value	q_value	significant
ENSG00000274978.1	ENSG00000274978.1	RNU11	chr1:28648599-28648733	Prone	Prot	OK	0.0551307	76.7932	10.4439	0.0241537	5e-05	0.00034525	yes
ENSG00000174600.12	ENSG00000174600.12	CMKLR1	chr12:108288043-108339341	Prone	Prot	OK	0.0108188	1.9484	7.4926	0.226795	0.0009	0.0049186	yes
ENSG00000267206.4	ENSG00000267206.4	LCN6	chr9:136738166-136748528	Prone	Prot	OK	0.0818858	2.21158	4.75532	0.626163	0.00015	0.000961801	yes
ENSG00000138061.10	ENSG00000138061.10	CYP1B1	chr2:37923186-38239590	Prone	Prot	OK	0.0438669	1.05172	4.58348	0.331709	5e-05	0.00034525	yes
ENSG00000165272.13	ENSG00000165272.13	AQP3	chr9:33441153-33447611	Prone	Prot	OK	0.465063	10.249	4.46191	4.83963	5e-05	0.00034525	yes
ENSG00000049540.15	ENSG00000049540.15	ELN	chr7:74027788-74069907	Prone	Prot	OK	0.575438	11.654	4.34002	1.80789	5e-05	0.00034525	yes
ENSG00000070526.13	ENSG00000070526.13	ST6GALNAC1	chr17:76624760-76643838	Prone	Prot	OK	0.0492951	0.951052	4.27001	0.265805	0.01245	0.0472785	yes
ENSG00000136826.13	ENSG00000136826.13	KLF4	chr9:107484851-107490482	Prone	Prot	OK	0.866985	15.1812	4.13014	5.94206	5e-05	0.00034525	yes
ENSG00000132622.9	ENSG00000132622.9	HSPA12B	chr20:3732666-3753111	Prone	Prot	OK	1.27726	20.821	4.02692	11.6378	5e-05	0.00034525	yes
ENSG00000147697.7	ENSG00000147697.7	GSDMC	chr8:129748195-129786888	Prone	Prot	OK	0.127387	1.98736	3.96357	1.00567	5e-05	0.00034525	yes
ENSG00000169442.7	ENSG00000169442.7	CD52	chr1:26279175-26320523	Prone	Prot	OK	1.62907	24.6993	3.92235	2.71036	5e-05	0.00034525	yes
ENSG00000159871.13	ENSG00000159871.13	LYPD5	chr19:43795928-43827206	Prone	Prot	OK	0.102987	1.49276	3.85744	0.684417	5e-05	0.00034525	yes
ENSG00000127528.5	ENSG00000127528.5	KLF2	chr19:16324816-16327874	Prone	Prot	OK	3.94787	55.3465	3.80935	11.4564	5e-05	0.00034525	yes
ENSG00000102575.9	ENSG00000102575.9	ACP5	chr19:11559373-11619135	Prone	Prot	OK	1.19085	14.8173	3.63721	2.85168	5e-05	0.00034525	yes
ENSG00000142661.17	ENSG00000142661.17	MYOM3	chr1:24040834-24112175	Prone	Prot	OK	0.0912462	1.09299	3.58237	0.992792	5e-05	0.00034525	yes
ENSG00000136999.4	ENSG00000136999.4	NOV	chr8:119416305-119462350	Prone	Prot	OK	0.736988	8.53409	3.53353	5.48839	5e-05	0.00034525	yes
ENSG00000104783.10	ENSG00000104783.10	KCNN4	chr19:43766532-43781257	Prone	Prot	OK	0.37589	4.27397	3.50719	2.14519	5e-05	0.00034525	yes
ENSG00000164530.12	ENSG00000164530.12	PI16	chr6:36948262-36964837	Prone	Prot	OK	0.313334	3.55381	3.5036	2.43089	5e-05	0.00034525	yes
ENSG00000154734.13	ENSG00000154734.13	ADAMTS1	chr21:26835746-26845409	Prone	Prot	OK	3.41912	38.0053	3.4745	9.87332	5e-05	0.00034525	yes
ENSG00000132470.12	ENSG00000132470.12	ITGB4	chr17:75721327-75765711	Prone	Prot	OK	3.56252	37.3869	3.39156	7.3823	5e-05	0.00034525	yes
ENSG00000065618.15	ENSG00000065618.15	COL17A1	chr10:104031285-104086002	Prone	Prot	OK	0.551059	5.40779	3.29476	2.71902	5e-05	0.00034525	yes
ENSG00000174640.11	ENSG00000174640.11	SLCO2A1	chr3:133932695-134052184	Prone	Prot	OK	1.73862	16.8808	3.27937	4.4988	5e-05	0.00034525	yes
ENSG00000164619.7	ENSG00000164619.7	BMPER	chr7:33904910-34155872	Prone	Prot	OK	0.227913	2.16318	3.2466	1.17193	5e-05	0.00034525	yes
ENSG00000100033.15	ENSG00000100033.15	PRODH	chr22:18906027-18936553	Prone	Prot	OK	0.106102	1.00653	3.24587	0.530366	5e-05	0.00034525	yes
ENSG00000106404.12	ENSG00000106404.12	CLDN15	chr7:101232091-101238820	Prone	Prot	OK	5.15011	46.3382	3.16953	10.535	5e-05	0.00034525	yes
ENSG00000196154.10	ENSG00000196154.10	S100A4	chr1:153543612-153550136	Prone	Prot	OK	2.96404	25.2117	3.08846	5.94372	5e-05	0.00034525	yes
ENSG00000144668.10	ENSG00000144668.10	ITGA9	chr3:37452114-37861780	Prone	Prot	OK	0.332269	2.40829	2.85759	2.06654	5e-05	0.00034525	yes
ENSG00000188015.8	ENSG00000188015.8	S100A3	chr1:153543612-153550136	Prone	Prot	OK	0.254591	1.69485	2.7349	1.28598	0.0001	0.000658879	yes
ENSG00000139549.2	ENSG00000139549.2	DHH	chr12:49089420-49094819	Prone	Prot	OK	0.626382	3.99013	2.67132	4.07416	5e-05	0.00034525	yes
ENSG00000196878.11	ENSG00000196878.11	LAMB3	chr1:209614869-209652466	Prone	Prot	OK	2.19242	12.9036	2.55718	5.87943	5e-05	0.00034525	yes
ENSG00000108602.16	ENSG00000108602.16	ALDH3A1	chr17:19737681-19748943	Prone	Prot	OK	0.465383	2.6142	2.48988	1.17514	5e-05	0.00034525	yes
ENSG00000198624.11	ENSG00000198624.11	CCDC69	chr5:151181051-151270440	Prone	Prot	OK	2.57263	14.2999	2.47469	4.45504	5e-05	0.00034525	yes
ENSG00000065054.12	ENSG00000065054.12	SLC9A3R2	chr16:2025355-2039026	Prone	Prot	OK	34.6663	189.211	2.44839	13.0258	5e-05	0.00034525	yes
ENSG00000101187.14	ENSG00000101187.14	SLCO4A1	chr20:62640718-62685785	Prone	Prot	OK	1.12425	6.0959	2.43887	3.15643	5e-05	0.00034525	yes
ENSG00000184344.3	ENSG00000184344.3	GDF3	chr12:7689781-7695776	Prone	Prot	OK	3.42183	18.2787	2.41732	7.32808	5e-05	0.00034525	yes
ENSG00000189129.12	ENSG00000189129.12	PLAC9	chr10:80131681-80145359	Prone	Prot	OK	1.85412	9.61647	2.37477	3.33079	5e-05	0.00034525	yes
ENSG00000137573.12	ENSG00000137573.12	SULF1	chr8:69466623-69660915	Prone	Prot	OK	2.88657	14.4235	2.32099	3.40591	5e-05	0.00034525	yes
ENSG00000142748.11	ENSG00000142748.11	FCN3	chr1:27369111-27374824	Prone	Prot	OK	0.194964	0.944176	2.27585	1.06473	0.0003	0.00181001	yes
ENSG00000110042.6	ENSG00000110042.6	DTX4	chr11:59171429-59212951	Prone	Prot	OK	0.228798	1.10372	2.27023	1.27717	5e-05	0.00034525	yes
ENSG00000099864.16	ENSG00000099864.16	PALM	chr19:709092-748330	Prone	Prot	OK	3.87632	18.4115	2.24785	7.95372	5e-05	0.00034525	yes
ENSG00000133687.14	ENSG00000133687.14	TMTC1	chr12:29500839-29784759	Prone	Prot	OK	2.92105	13.2054	2.17657	7.15585	5e-05	0.00034525	yes
ENSG00000213316.8	ENSG00000213316.8	LTC4S	chr5:179732849-179796647	Prone	Prot	OK	0.859159	3.85878	2.16715	1.11301	5e-05	0.00034525	yes
ENSG00000130707.16	ENSG00000130707.16	ASS1	chr9:130444928-130501274	Prone	Prot	OK	3.02472	13.3726	2.1444	5.05045	5e-05	0.00034525	yes
ENSG00000167641.9	ENSG00000167641.9	PPP1R14A	chr19:38244034-38305009	Prone	Prot	OK	0.636493	2.78246	2.12815	1.14105	5e-05	0.00034525	yes
ENSG00000226674.7	ENSG00000226674.7	TEX41	chr2:144667966-145262988	Prone	Prot	OK	0.749787	3.25449	2.11788	0.508143	5e-05	0.00034525	yes
ENSG00000250264.1	ENSG00000250264.1	XXbac-BPG246D15.9	chr6:32812762-32838822	Prone	Prot	OK	0.881571	3.82624	2.11778	1.06466	0.00795	0.0324349	yes
ENSG00000126759.11	ENSG00000126759.11	CFP	chrX:47624212-47630305	Prone	Prot	OK	0.4479	1.90556	2.08897	1.39055	5e-05	0.00034525	yes
ENSG00000101695.7	ENSG00000101695.7	RNF125	chr18:32018371-32470484	Prone	Prot	OK	0.339253	1.42109	2.06657	1.11149	5e-05	0.00034525	yes
ENSG00000277782.1	ENSG00000277782.1	RP11-775C24.5	chr15:80999592-80999981	Prone	Prot	OK	0.804896	3.3651	2.06377	1.66813	5e-05	0.00034525	yes
ENSG00000115884.9	ENSG00000115884.9	SDC1	chr2:20200796-20225433	Prone	Prot	OK	0.264049	1.10035	2.05908	0.979051	5e-05	0.00034525	yes
ENSG00000184232.7	ENSG00000184232.7	OAF	chr11:120210766-120230332	Prone	Prot	OK	4.79629	19.7742	2.04363	6.38527	5e-05	0.00034525	yes
ENSG00000084734.7	ENSG00000084734.7	GCKR	chr2:27496841-27523684	Prone	Prot	OK	0.770279	3.12152	2.0188	1.97519	5e-05	0.00034525	yes
ENSG00000067113.15	ENSG00000067113.15	PPAP2A	chr5:55307759-55535050	Prone	Prot	OK	9.875	39.0637	1.98397	4.74946	5e-05	0.00034525	yes
ENSG00000095383.18	ENSG00000095383.18	TBC1D2	chr9:98198998-98255721	Prone	Prot	OK	1.50334	5.9165	1.97657	5.27194	5e-05	0.00034525	yes
ENSG00000168477.16	ENSG00000168477.16	TNXB	chr6:32038264-32128253	Prone	Prot	OK	0.290979	1.06428	1.87089	0.794361	0.00055	0.00314349	yes
ENSG00000273650.1	ENSG00000273650.1	CTD-3193K9.11	chr17:42751288-42751717	Prone	Prot	OK	0.403267	1.45869	1.85486	1.08495	5e-05	0.00034525	yes
ENSG00000175906.4	ENSG00000175906.4	ARL4D	chr17:43398958-43401137	Prone	Prot	OK	1.54955	5.55341	1.84153	4.23269	5e-05	0.00034525	yes
ENSG00000133019.10	ENSG00000133019.10	CHRM3	chr1:239386564-239916955	Prone	Prot	OK	0.725553	2.5633	1.82085	1.82107	5e-05	0.00034525	yes
ENSG00000184489.10	ENSG00000184489.10	PTP4A3	chr8:141389938-141432454	Prone	Prot	OK	4.42536	15.5269	1.8109	5.01602	5e-05	0.00034525	yes
ENSG00000101224.16	ENSG00000101224.16	CDC25B	chr20:3786771-3806121	Prone	Prot	OK	9.47233	33.0812	1.80422	7.31169	5e-05	0.00034525	yes
ENSG00000114378.15	ENSG00000114378.15	HYAL1	chr3:50299888-50312381	Prone	Prot	OK	1.30888	4.51295	1.78574	2.96983	5e-05	0.00034525	yes
ENSG00000125968.8	ENSG00000125968.8	ID1	chr20:31605282-31606515	Prone	Prot	OK	19.9281	68.197	1.7749	7.92415	5e-05	0.00034525	yes
ENSG00000178038.15	ENSG00000178038.15	ALS2CL	chr3:46668996-46693704	Prone	Prot	OK	3.30319	11.1622	1.75669	5.70794	5e-05	0.00034525	yes
ENSG00000178175.10	ENSG00000178175.10	ZNF366	chr5:72442651-72507727	Prone	Prot	OK	1.00451	3.37693	1.74922	3.20701	5e-05	0.00034525	yes
ENSG00000226239.1	ENSG00000226239.1	RP1-310O13.7	chr20:32010449-32032180	Prone	Prot	OK	1.9659	6.55849	1.73817	2.70119	5e-05	0.00034525	yes
ENSG00000186654.19	ENSG00000186654.19	PRR5	chr22:44668546-44862788	Prone	Prot	OK	0.977424	3.26057	1.73807	1.7276	5e-05	0.00034525	yes
ENSG00000131477.9	ENSG00000131477.9	RAMP2	chr17:42753913-42763041	Prone	Prot	OK	31.7342	105.524	1.73345	7.29373	5e-05	0.00034525	yes
ENSG00000251196.1	ENSG00000251196.1	RP11-54F2.1	chr5:10564329-10657816	Prone	Prot	OK	0.607873	2.00897	1.72461	1.36587	0.0001	0.000658879	yes
ENSG00000185745.9	ENSG00000185745.9	IFIT1	chr10:89213568-89414557	Prone	Prot	OK	0.693769	2.27669	1.71441	1.238	5e-05	0.00034525	yes
ENSG00000260018.1	ENSG00000260018.1	RP11-505K9.1	chr16:84117050-84117571	Prone	Prot	OK	0.545423	1.78281	1.70871	1.26113	0.0047	0.0208331	yes
ENSG00000131979.17	ENSG00000131979.17	GCH1	chr14:54842007-54902852	Prone	Prot	OK	1.66135	5.35503	1.68854	3.26009	5e-05	0.00034525	yes
ENSG00000000938.11	ENSG00000000938.11	FGR	chr1:27612063-27635277	Prone	Prot	OK	0.293711	0.944903	1.68577	1.15569	5e-05	0.00034525	yes
ENSG00000183615.5	ENSG00000183615.5	FAM167B	chr1:32247232-32248856	Prone	Prot	OK	7.47786	24.0007	1.68238	5.60849	5e-05	0.00034525	yes
ENSG00000253519.1	ENSG00000253519.1	AC106801.1	chr5:157260121-157575775	Prone	Prot	OK	0.359722	1.1541	1.68182	0.830435	0.0093	0.0369068	yes
ENSG00000169184.5	ENSG00000169184.5	MN1	chr22:27748276-27801498	Prone	Prot	OK	0.789694	2.48782	1.65552	2.92681	5e-05	0.00034525	yes
ENSG00000164850.13	ENSG00000164850.13	GPER1	chr7:996985-1138260	Prone	Prot	OK	1.31505	4.14186	1.65516	1.62334	5e-05	0.00034525	yes
ENSG00000106003.11	ENSG00000106003.11	LFNG	chr7:2512528-2529177	Prone	Prot	OK	2.36824	7.43167	1.64987	4.07995	5e-05	0.00034525	yes
ENSG00000157111.11	ENSG00000157111.11	TMEM171	chr5:73120291-73131817	Prone	Prot	OK	2.15329	6.71978	1.64187	3.94176	5e-05	0.00034525	yes
ENSG00000164236.10	ENSG00000164236.10	ANKRD33B	chr5:10564329-10657816	Prone	Prot	OK	1.06158	3.30344	1.63776	5.71753	5e-05	0.00034525	yes
ENSG00000090776.5	ENSG00000090776.5	EFNB1	chrX:68828996-68842147	Prone	Prot	OK	16.5415	51.2141	1.63045	9.35801	5e-05	0.00034525	yes
ENSG00000197943.8	ENSG00000197943.8	PLCG2	chr16:81738247-81962693	Prone	Prot	OK	11.9686	36.8212	1.62128	4.9658	5e-05	0.00034525	yes
ENSG00000178031.14	ENSG00000178031.14	ADAMTSL1	chr9:18473893-18910950	Prone	Prot	OK	1.64723	5.04249	1.6141	2.39423	5e-05	0.00034525	yes
ENSG00000002587.8	ENSG00000002587.8	HS3ST1	chr4:11393149-11429765	Prone	Prot	OK	0.464409	1.4063	1.59843	0.852765	0.00025	0.00153863	yes
ENSG00000100292.15	ENSG00000100292.15	HMOX1	chr22:35380360-35394214	Prone	Prot	OK	69.4586	208.861	1.58832	8.90164	5e-05	0.00034525	yes
ENSG00000261269.1	ENSG00000261269.1	RP11-389C8.2	chr5:72439902-72442387	Prone	Prot	OK	1.23184	3.68564	1.5811	4.29578	5e-05	0.00034525	yes
ENSG00000102349.13	ENSG00000102349.13	KLF8	chrX:56232420-56287889	Prone	Prot	OK	0.649259	1.93766	1.57745	2.63536	5e-05	0.00034525	yes
ENSG00000007312.11	ENSG00000007312.11	CD79B	chr17:63928739-63932354	Prone	Prot	OK	0.385739	1.14841	1.57394	0.799887	0.0002	0.00125222	yes
ENSG00000161714.10	ENSG00000161714.10	PLCD3	chr17:45023339-45144181	Prone	Prot	OK	10.9599	32.4889	1.56772	2.10029	5e-05	0.00034525	yes
ENSG00000102935.10	ENSG00000102935.10	ZNF423	chr16:49487523-49857919	Prone	Prot	OK	0.446964	1.30857	1.54976	1.25744	5e-05	0.00034525	yes
ENSG00000144063.3	ENSG00000144063.3	MALL	chr2:110083869-110116566	Prone	Prot	OK	18.8722	55.2488	1.54968	7.08877	5e-05	0.00034525	yes
ENSG00000124593.13	ENSG00000124593.13	PRICKLE4	chr6:41770175-41895361	Prone	Prot	OK	9.55132	27.8817	1.54555	4.53727	5e-05	0.00034525	yes
ENSG00000273297.1	ENSG00000273297.1	RP11-38M8.1	chr7:134416289-134432453	Prone	Prot	OK	0.773711	2.23899	1.53298	1.56551	5e-05	0.00034525	yes
ENSG00000109099.12	ENSG00000109099.12	PMP22	chr17:15229776-15265707	Prone	Prot	OK	26.6677	76.9583	1.52898	8.34744	5e-05	0.00034525	yes
ENSG00000258791.6	ENSG00000258791.6	LINC00520	chr14:55781134-55796688	Prone	Prot	OK	2.04085	5.85284	1.51997	1.9592	5e-05	0.00034525	yes
ENSG00000177191.2	ENSG00000177191.2	B3GNT8	chr19:41262495-41440717	Prone	Prot	OK	20.6046	59.0763	1.51961	4.0948	5e-05	0.00034525	yes
ENSG00000135074.14	ENSG00000135074.14	ADAM19	chr5:157260121-157575775	Prone	Prot	OK	11.5955	33.1285	1.51451	7.15916	5e-05	0.00034525	yes
ENSG00000257225.1	ENSG00000257225.1	RP11-328C8.4	chr12:42238446-42590355	Prone	Prot	OK	2.92341	8.34901	1.51395	2.97709	5e-05	0.00034525	yes
ENSG00000148488.14	ENSG00000148488.14	ST8SIA6	chr10:17318382-17454330	Prone	Prot	OK	2.0721	5.91744	1.51388	3.82098	5e-05	0.00034525	yes
ENSG00000072954.5	ENSG00000072954.5	TMEM38A	chr19:16661126-16690029	Prone	Prot	OK	1.73437	4.949	1.51272	2.28392	5e-05	0.00034525	yes
ENSG00000173868.10	ENSG00000173868.10	PHOSPHO1	chr17:49223361-49230766	Prone	Prot	OK	0.858859	2.42988	1.50039	1.64236	5e-05	0.00034525	yes
ENSG00000136153.18	ENSG00000136153.18	LMO7	chr13:75549479-75859870	Prone	Prot	OK	7.60847	21.349	1.48849	3.38684	5e-05	0.00034525	yes
ENSG00000164976.8	ENSG00000164976.8	KIAA1161	chr9:34366669-34376853	Prone	Prot	OK	1.57074	4.40453	1.48754	3.41495	5e-05	0.00034525	yes
ENSG00000101333.15	ENSG00000101333.15	PLCB4	chr20:9068762-9481242	Prone	Prot	OK	0.492643	1.37802	1.48398	0.895345	5e-05	0.00034525	yes
ENSG00000278224.3	ENSG00000278224.3	PRICKLE4	chr6:41770175-41895361	Prone	Prot	OK	2.22114	6.20335	1.48175	0.82215	0.00725	0.0298991	yes
ENSG00000169252.5	ENSG00000169252.5	ADRB2	chr5:148825244-148828687	Prone	Prot	OK	1.07965	2.99382	1.47142	4.03018	5e-05	0.00034525	yes
ENSG00000071282.10	ENSG00000071282.10	LMCD1	chr3:7952804-8611924	Prone	Prot	OK	1.25677	3.4841	1.47107	2.0051	5e-05	0.00034525	yes
ENSG00000279660.1	ENSG00000279660.1	RP11-849N15.3	chr17:15229776-15265707	Prone	Prot	OK	0.756197	2.08744	1.4649	1.02438	0.0013	0.00680148	yes
ENSG00000167077.11	ENSG00000167077.11	MEI1	chr22:41699498-41799456	Prone	Prot	OK	0.593933	1.63884	1.4643	0.795854	5e-05	0.00034525	yes
ENSG00000176438.11	ENSG00000176438.11	SYNE3	chr14:95407265-95475836	Prone	Prot	OK	5.63611	15.4796	1.4576	6.15264	5e-05	0.00034525	yes
ENSG00000204161.12	ENSG00000204161.12	C10orf128	chr10:49154724-49188585	Prone	Prot	OK	7.47552	20.4577	1.45239	4.38023	5e-05	0.00034525	yes
ENSG00000139174.9	ENSG00000139174.9	PRICKLE1	chr12:42238446-42590355	Prone	Prot	OK	5.42267	14.8261	1.45106	1.57155	5e-05	0.00034525	yes
ENSG00000173706.11	ENSG00000173706.11	HEG1	chr3:124965709-125055958	Prone	Prot	OK	9.00862	24.6018	1.44939	4.67998	5e-05	0.00034525	yes
ENSG00000167644.10	ENSG00000167644.10	C19orf33	chr19:38244034-38305009	Prone	Prot	OK	12.9122	35.2185	1.4476	3.38154	5e-05	0.00034525	yes
ENSG00000108798.7	ENSG00000108798.7	ABI3	chr17:49202790-49223225	Prone	Prot	OK	7.68666	20.8857	1.44209	5.12008	5e-05	0.00034525	yes
ENSG00000107249.20	ENSG00000107249.20	GLIS3	chr9:3824126-4348392	Prone	Prot	OK	2.97028	8.07049	1.44206	2.30826	5e-05	0.00034525	yes
ENSG00000162522.9	ENSG00000162522.9	KIAA1522	chr1:32741884-32774970	Prone	Prot	OK	2.64118	7.17109	1.44101	4.60008	5e-05	0.00034525	yes
ENSG00000137225.11	ENSG00000137225.11	CAPN11	chr6:44158810-44184402	Prone	Prot	OK	1.79631	4.84572	1.43168	2.75922	5e-05	0.00034525	yes
ENSG00000126803.9	ENSG00000126803.9	HSPA2	chr14:64388030-64546173	Prone	Prot	OK	0.875385	2.3469	1.42277	0.95624	5e-05	0.00034525	yes
ENSG00000072163.17	ENSG00000072163.17	LIMS2	chr2:127638380-127681786	Prone	Prot	OK	5.62875	15.0746	1.42124	4.14817	5e-05	0.00034525	yes
ENSG00000138166.5	ENSG00000138166.5	DUSP5	chr10:110497837-110511544	Prone	Prot	OK	8.12605	21.5917	1.40985	6.75906	5e-05	0.00034525	yes
ENSG00000006638.10	ENSG00000006638.10	TBXA2R	chr19:3594505-3606840	Prone	Prot	OK	0.597024	1.57162	1.3964	1.34089	5e-05	0.00034525	yes
ENSG00000089127.11	ENSG00000089127.11	OAS1	chr12:112906776-113017751	Prone	Prot	OK	2.03088	5.33523	1.39345	1.54203	5e-05	0.00034525	yes
ENSG00000162407.8	ENSG00000162407.8	PPAP2B	chr1:56494746-56645301	Prone	Prot	OK	23.291	60.5232	1.37771	8.22968	5e-05	0.00034525	yes
ENSG00000158859.9	ENSG00000158859.9	ADAMTS4	chr1:161184307-161214395	Prone	Prot	OK	5.00256	12.9444	1.3716	2.28419	5e-05	0.00034525	yes
ENSG00000111335.11	ENSG00000111335.11	OAS2	chr12:112906776-113017751	Prone	Prot	OK	2.92924	7.53925	1.3639	2.39908	5e-05	0.00034525	yes
ENSG00000143842.13	ENSG00000143842.13	SOX13	chr1:204073114-204127743	Prone	Prot	OK	6.98258	17.9146	1.3593	3.41909	5e-05	0.00034525	yes
ENSG00000064687.11	ENSG00000064687.11	ABCA7	chr19:1040100-1065572	Prone	Prot	OK	3.65438	9.36338	1.3574	1.72874	5e-05	0.00034525	yes
ENSG00000088280.17	ENSG00000088280.17	ASAP3	chr1:23428562-23484568	Prone	Prot	OK	5.10531	13.032	1.35198	3.47691	5e-05	0.00034525	yes
ENSG00000177303.8	ENSG00000177303.8	CASKIN2	chr17:75500260-75515583	Prone	Prot	OK	6.44957	16.4075	1.34708	2.88684	5e-05	0.00034525	yes
ENSG00000004660.13	ENSG00000004660.13	CAMKK1	chr17:3860314-3894891	Prone	Prot	OK	1.59407	4.05332	1.34638	4.43676	5e-05	0.00034525	yes
ENSG00000101331.14	ENSG00000101331.14	CCM2L	chr20:32010449-32032180	Prone	Prot	OK	6.89348	17.5247	1.34609	4.93124	5e-05	0.00034525	yes
ENSG00000160789.18	ENSG00000160789.18	LMNA	chr1:156082572-156140089	Prone	Prot	OK	157.162	396.285	1.33428	5.3433	5e-05	0.00034525	yes
ENSG00000143537.12	ENSG00000143537.12	ADAM15	chr1:155033823-155062775	Prone	Prot	OK	133.938	337.155	1.33185	6.82857	5e-05	0.00034525	yes
ENSG00000164867.9	ENSG00000164867.9	NOS3	chr7:150990994-151024499	Prone	Prot	OK	26.7754	66.8301	1.31959	4.24393	5e-05	0.00034525	yes
ENSG00000138685.11	ENSG00000138685.11	FGF2	chr4:122826707-122922968	Prone	Prot	OK	3.90635	9.72516	1.3159	5.76937	5e-05	0.00034525	yes
ENSG00000087266.14	ENSG00000087266.14	SH3BP2	chr4:2793022-2841098	Prone	Prot	OK	28.1605	69.9667	1.31299	4.07896	5e-05	0.00034525	yes
ENSG00000066735.13	ENSG00000066735.13	KIF26A	chr14:104138722-104180894	Prone	Prot	OK	3.10905	7.7037	1.30908	5.91781	5e-05	0.00034525	yes
ENSG00000198947.13	ENSG00000198947.13	DMD	chrX:31097676-33339441	Prone	Prot	OK	4.8821	11.908	1.28636	2.09264	5e-05	0.00034525	yes
ENSG00000171840.10	ENSG00000171840.10	NINJ2	chr12:564295-663779	Prone	Prot	OK	0.929619	2.26601	1.28545	1.07661	0.0001	0.000658879	yes
ENSG00000138185.15	ENSG00000138185.15	ENTPD1	chr10:95711778-96090238	Prone	Prot	OK	34.9189	84.458	1.27423	4.64141	5e-05	0.00034525	yes
ENSG00000148120.13	ENSG00000148120.13	C9orf3	chr9:94726700-95087218	Prone	Prot	OK	18.6391	45.0467	1.27309	4.7234	5e-05	0.00034525	yes
ENSG00000134138.18	ENSG00000134138.18	MEIS2	chr15:36889203-37101299	Prone	Prot	OK	25.6332	61.8818	1.2715	5.3178	5e-05	0.00034525	yes
ENSG00000115594.10	ENSG00000115594.10	IL1R1	chr2:102064543-102182108	Prone	Prot	OK	2.07598	4.99291	1.26609	2.91261	5e-05	0.00034525	yes
ENSG00000085063.13	ENSG00000085063.13	CD59	chr11:33698260-33736445	Prone	Prot	OK	599.432	1441.4	1.2658	5.10174	5e-05	0.00034525	yes
ENSG00000197245.4	ENSG00000197245.4	FAM110D	chr1:26159019-26162628	Prone	Prot	OK	2.44611	5.87962	1.26523	2.847	5e-05	0.00034525	yes
ENSG00000129355.6	ENSG00000129355.6	CDKN2D	chr19:10566461-10569059	Prone	Prot	OK	2.64983	6.34857	1.26053	2.91097	5e-05	0.00034525	yes
ENSG00000231535.4	ENSG00000231535.4	LINC00278	chrY:3002911-3102272	Prone	Prot	OK	0.617693	1.46953	1.25039	1.05569	0.0003	0.00181001	yes
ENSG00000130300.7	ENSG00000130300.7	PLVAP	chr19:17351447-17377350	Prone	Prot	OK	3.39883	8.07502	1.24843	2.3822	5e-05	0.00034525	yes
ENSG00000166289.5	ENSG00000166289.5	PLEKHF1	chr19:29665055-29675457	Prone	Prot	OK	3.38212	7.94758	1.23259	3.15575	5e-05	0.00034525	yes
ENSG00000104368.16	ENSG00000104368.16	PLAT	chr8:42175232-42207724	Prone	Prot	OK	22.0636	51.7658	1.23033	6.21025	5e-05	0.00034525	yes
ENSG00000181444.11	ENSG00000181444.11	ZNF467	chr7:149764181-149773479	Prone	Prot	OK	4.66309	10.935	1.22959	3.74118	5e-05	0.00034525	yes
ENSG00000197959.12	ENSG00000197959.12	DNM3	chr1:171841497-172468831	Prone	Prot	OK	1.03571	2.42105	1.22501	1.37636	5e-05	0.00034525	yes
ENSG00000176907.4	ENSG00000176907.4	C8orf4	chr8:40153454-40155308	Prone	Prot	OK	6.88461	16.0093	1.21746	5.56971	5e-05	0.00034525	yes
ENSG00000196754.9	ENSG00000196754.9	S100A2	chr1:153561107-153567890	Prone	Prot	OK	0.912656	2.11664	1.21363	0.983992	0.00055	0.00314349	yes
ENSG00000128284.18	ENSG00000128284.18	APOL3	chr22:36140329-36166177	Prone	Prot	OK	19.673	45.5206	1.2103	4.28491	5e-05	0.00034525	yes
ENSG00000216490.3	ENSG00000216490.3	IFI30	chr19:18153117-18178117	Prone	Prot	OK	0.962956	2.22589	1.20884	0.901574	0.00085	0.00467616	yes
ENSG00000259460.1	ENSG00000259460.1	RP11-128A17.1	chr15:36889203-37101299	Prone	Prot	OK	7.39928	17.0833	1.20713	1.30136	5e-05	0.00034525	yes
ENSG00000181652.17	ENSG00000181652.17	ATG9B	chr7:150990994-151024499	Prone	Prot	OK	9.41118	21.7151	1.20625	1.54919	5e-05	0.00034525	yes
ENSG00000157514.15	ENSG00000157514.15	TSC22D3	chrX:107713220-107777342	Prone	Prot	OK	25.4008	58.4889	1.20329	5.61738	5e-05	0.00034525	yes
ENSG00000165424.6	ENSG00000165424.6	ZCCHC24	chr10:79382324-79445627	Prone	Prot	OK	4.78183	10.9587	1.19644	5.69825	5e-05	0.00034525	yes
ENSG00000130222.9	ENSG00000130222.9	GADD45G	chr9:89605012-89606555	Prone	Prot	OK	0.507967	1.16339	1.19553	0.895001	0.00365	0.0166986	yes
ENSG00000261602.1	ENSG00000261602.1	CTD-2033A16.1	chr16:69706995-69726951	Prone	Prot	OK	19.6586	44.9863	1.19433	1.32553	5e-05	0.00034525	yes
ENSG00000187513.8	ENSG00000187513.8	GJA4	chr1:34712736-34859816	Prone	Prot	OK	37.4078	85.1302	1.18633	5.19939	5e-05	0.00034525	yes
ENSG00000183153.6	ENSG00000183153.6	GJD3	chr17:40360654-40364693	Prone	Prot	OK	2.50347	5.69223	1.18507	1.18629	0.0001	0.000658879	yes
ENSG00000175591.10	ENSG00000175591.10	P2RY2	chr11:73218297-73236352	Prone	Prot	OK	0.450945	1.02295	1.18171	1.55264	5e-05	0.00034525	yes
ENSG00000125347.12	ENSG00000125347.12	IRF1	chr5:132481608-132490798	Prone	Prot	OK	5.52979	12.5336	1.1805	3.48863	5e-05	0.00034525	yes
ENSG00000196196.2	ENSG00000196196.2	HRCT1	chr9:35906191-35907141	Prone	Prot	OK	0.818834	1.85177	1.17726	1.60605	5e-05	0.00034525	yes
ENSG00000169129.13	ENSG00000169129.13	AFAP1L2	chr10:114294823-114404756	Prone	Prot	OK	0.971322	2.16438	1.15593	1.5488	5e-05	0.00034525	yes
ENSG00000115604.9	ENSG00000115604.9	IL18R1	chr2:102311501-102398775	Prone	Prot	OK	4.34374	9.62638	1.14806	1.97408	5e-05	0.00034525	yes
ENSG00000138678.9	ENSG00000138678.9	AGPAT9	chr4:83535913-83605875	Prone	Prot	OK	2.29813	5.09048	1.14734	1.60078	5e-05	0.00034525	yes
ENSG00000119922.8	ENSG00000119922.8	IFIT2	chr10:89213568-89414557	Prone	Prot	OK	1.57684	3.48924	1.14588	1.63749	5e-05	0.00034525	yes
ENSG00000100036.12	ENSG00000100036.12	SLC35E4	chr22:30635651-30669016	Prone	Prot	OK	5.60141	12.3753	1.14361	3.93382	5e-05	0.00034525	yes
ENSG00000171604.10	ENSG00000171604.10	CXXC5	chr5:139647298-139683882	Prone	Prot	OK	3.40007	7.51087	1.14342	1.89788	5e-05	0.00034525	yes
ENSG00000108175.15	ENSG00000108175.15	ZMIZ1	chr10:79069034-79316528	Prone	Prot	OK	3.70812	8.1782	1.1411	2.09285	5e-05	0.00034525	yes
ENSG00000198774.4	ENSG00000198774.4	RASSF9	chr12:85800696-85836570	Prone	Prot	OK	0.866247	1.9102	1.14088	3.64032	5e-05	0.00034525	yes
ENSG00000143515.15	ENSG00000143515.15	ATP8B2	chr1:154325552-154351307	Prone	Prot	OK	25.334	55.7419	1.13769	3.73812	5e-05	0.00034525	yes
ENSG00000157601.12	ENSG00000157601.12	MX1	chr21:41420303-41459214	Prone	Prot	OK	3.09236	6.78171	1.13294	1.87575	5e-05	0.00034525	yes
ENSG00000105784.14	ENSG00000105784.14	RUNDC3B	chr7:87503632-87832296	Prone	Prot	OK	0.651163	1.42126	1.12608	0.765831	0.0002	0.00125222	yes
ENSG00000129538.12	ENSG00000129538.12	RNASE1	chr14:20801227-20803278	Prone	Prot	OK	119.116	259.929	1.12575	6.67227	5e-05	0.00034525	yes
ENSG00000166265.10	ENSG00000166265.10	CYYR1	chr21:26378551-26573284	Prone	Prot	OK	6.90946	15.0528	1.12339	3.19934	5e-05	0.00034525	yes
ENSG00000143819.11	ENSG00000143819.11	EPHX1	chr1:225810091-225882369	Prone	Prot	OK	6.14345	13.3437	1.11904	2.81139	5e-05	0.00034525	yes
ENSG00000143786.6	ENSG00000143786.6	CNIH3	chr1:224385142-224740549	Prone	Prot	OK	1.69411	3.65115	1.10782	0.639573	0.00135	0.00701105	yes
ENSG00000161798.6	ENSG00000161798.6	AQP5	chr12:49950740-49965681	Prone	Prot	OK	1.00624	2.1677	1.10718	1.6965	5e-05	0.00034525	yes
ENSG00000125910.5	ENSG00000125910.5	S1PR4	chr19:3172345-3180332	Prone	Prot	OK	1.16132	2.49864	1.10538	1.40629	5e-05	0.00034525	yes
ENSG00000130164.10	ENSG00000130164.10	LDLR	chr19:11089361-11155808	Prone	Prot	OK	9.65783	20.7777	1.10527	3.12078	5e-05	0.00034525	yes
ENSG00000138162.16	ENSG00000138162.16	TACC2	chr10:121989173-122254545	Prone	Prot	OK	6.74484	14.4683	1.10103	2.58627	5e-05	0.00034525	yes
ENSG00000143850.11	ENSG00000143850.11	PLEKHA6	chr1:204218850-204377665	Prone	Prot	OK	2.139	4.58822	1.101	0.9562	0.0027	0.0129578	yes
ENSG00000157557.10	ENSG00000157557.10	ETS2	chr21:38805306-38824955	Prone	Prot	OK	22.8468	48.9784	1.10015	5.66267	5e-05	0.00034525	yes
ENSG00000133056.12	ENSG00000133056.12	PIK3C2B	chr1:204377849-204494724	Prone	Prot	OK	15.9939	34.2611	1.09905	2.34438	5e-05	0.00034525	yes
ENSG00000112576.11	ENSG00000112576.11	CCND3	chr6:41934932-42050357	Prone	Prot	OK	25.1949	53.8103	1.09475	4.03537	5e-05	0.00034525	yes
ENSG00000185432.11	ENSG00000185432.11	METTL7A	chr12:50923471-50932517	Prone	Prot	OK	11.91	25.3287	1.0886	4.27454	5e-05	0.00034525	yes
ENSG00000163072.13	ENSG00000163072.13	NOSTRIN	chr2:168455861-168913371	Prone	Prot	OK	0.685244	1.45197	1.08332	0.829727	0.0002	0.00125222	yes
ENSG00000166825.12	ENSG00000166825.12	ANPEP	chr15:89784888-89815401	Prone	Prot	OK	30.3124	63.6676	1.07065	4.32086	5e-05	0.00034525	yes
ENSG00000132005.7	ENSG00000132005.7	RFX1	chr19:13961537-14007039	Prone	Prot	OK	1.47113	3.08177	1.06684	1.14777	5e-05	0.00034525	yes
ENSG00000096433.9	ENSG00000096433.9	ITPR3	chr6:33620364-33711727	Prone	Prot	OK	16.2864	34.1068	1.06639	6.27213	5e-05	0.00034525	yes
ENSG00000155962.11	ENSG00000155962.11	CLIC2	chrX:155276210-155334657	Prone	Prot	OK	7.94624	16.6321	1.06562	3.43313	5e-05	0.00034525	yes
ENSG00000147642.15	ENSG00000147642.15	SYBU	chr8:109573977-109691791	Prone	Prot	OK	1.39826	2.90799	1.05639	0.886205	5e-05	0.00034525	yes
ENSG00000168209.4	ENSG00000168209.4	DDIT4	chr10:72273919-72276036	Prone	Prot	OK	86.1172	179.071	1.05616	3.74383	5e-05	0.00034525	yes
ENSG00000196169.13	ENSG00000196169.13	KIF19	chr17:74326209-74355820	Prone	Prot	OK	1.16251	2.40549	1.04909	2.07695	5e-05	0.00034525	yes
ENSG00000172819.15	ENSG00000172819.15	RARG	chr12:53210566-53232980	Prone	Prot	OK	3.1827	6.58434	1.04879	2.0267	5e-05	0.00034525	yes
ENSG00000140406.3	ENSG00000140406.3	MESDC1	chr15:81000943-81005788	Prone	Prot	OK	4.23422	8.7379	1.04519	4.70081	5e-05	0.00034525	yes
ENSG00000015413.8	ENSG00000015413.8	DPEP1	chr16:89613307-89638456	Prone	Prot	OK	0.799155	1.64756	1.04378	0.731433	5e-05	0.00034525	yes
ENSG00000214578.5	ENSG00000214578.5	HMGN2P15	chr17:42753529-42753799	Prone	Prot	OK	2.40654	4.95405	1.04165	1.03082	0.0013	0.00680148	yes
ENSG00000173597.7	ENSG00000173597.7	SULT1B1	chr4:69721161-69787961	Prone	Prot	OK	6.11451	12.5728	1.04	3.05579	5e-05	0.00034525	yes
ENSG00000069399.11	ENSG00000069399.11	BCL3	chr19:44747704-44760044	Prone	Prot	OK	2.0466	4.20359	1.03839	1.36421	5e-05	0.00034525	yes
ENSG00000197291.7	ENSG00000197291.7	RAMP2-AS1	chr17:42753913-42763041	Prone	Prot	OK	2.39635	4.92056	1.03799	1.77025	5e-05	0.00034525	yes
ENSG00000137727.11	ENSG00000137727.11	ARHGAP20	chr11:110577041-110713189	Prone	Prot	OK	1.74666	3.56859	1.03075	4.26024	5e-05	0.00034525	yes
ENSG00000273729.1	ENSG00000273729.1	RP11-7F17.8	chr14:77024542-77031572	Prone	Prot	OK	0.745943	1.52325	1.03002	1.29243	0.0001	0.000658879	yes
ENSG00000267801.1	ENSG00000267801.1	RP11-552F3.9	chr17:75874160-75879546	Prone	Prot	OK	2.2297	4.54835	1.02849	1.77859	5e-05	0.00034525	yes
ENSG00000149798.4	ENSG00000149798.4	CDC42EP2	chr11:65314817-65322429	Prone	Prot	OK	10.5089	21.4312	1.0281	4.79383	5e-05	0.00034525	yes
ENSG00000119986.6	ENSG00000119986.6	AVPI1	chr10:97677423-97687323	Prone	Prot	OK	1.17637	2.39238	1.0241	1.96395	5e-05	0.00034525	yes
ENSG00000144724.17	ENSG00000144724.17	PTPRG	chr3:61561568-62369330	Prone	Prot	OK	18.4689	37.5565	1.02396	5.43921	5e-05	0.00034525	yes
ENSG00000261586.2	ENSG00000261586.2	RP11-923I11.6	chr12:51817888-51820150	Prone	Prot	OK	0.579887	1.17868	1.02333	1.81541	5e-05	0.00034525	yes
ENSG00000081041.8	ENSG00000081041.8	CXCL2	chr4:74097034-74099293	Prone	Prot	OK	1.39564	2.83379	1.0218	1.55696	5e-05	0.00034525	yes
ENSG00000158186.11	ENSG00000158186.11	MRAS	chr3:138347647-138405534	Prone	Prot	OK	3.15849	6.40086	1.01903	1.68599	5e-05	0.00034525	yes
ENSG00000101447.12	ENSG00000101447.12	FAM83D	chr20:38926311-38953106	Prone	Prot	OK	4.05108	8.20945	1.01898	3.96386	5e-05	0.00034525	yes
ENSG00000255874.2	ENSG00000255874.2	LINC00346	chr13:110863986-110870251	Prone	Prot	OK	0.616174	1.24752	1.01765	3.06155	5e-05	0.00034525	yes
ENSG00000130052.12	ENSG00000130052.12	STARD8	chrX:68647665-68725842	Prone	Prot	OK	7.0895	14.3404	1.01633	4.23157	5e-05	0.00034525	yes
ENSG00000129048.6	ENSG00000129048.6	ACKR4	chr3:132558137-132874223	Prone	Prot	OK	1.95396	3.94881	1.01502	1.21257	5e-05	0.00034525	yes
ENSG00000129467.12	ENSG00000129467.12	ADCY4	chr14:24318348-24340045	Prone	Prot	OK	29.8606	60.2503	1.01273	3.30784	5e-05	0.00034525	yes
ENSG00000138030.11	ENSG00000138030.11	KHK	chr2:27086746-27119115	Prone	Prot	OK	0.837368	1.68947	1.01264	1.03888	5e-05	0.00034525	yes
ENSG00000184584.11	ENSG00000184584.11	TMEM173	chr5:139475533-139482935	Prone	Prot	OK	36.3365	73.2636	1.01168	4.4186	5e-05	0.00034525	yes
ENSG00000148737.14	ENSG00000148737.14	TCF7L2	chr10:112950249-113167678	Prone	Prot	OK	0.817486	1.64732	1.01086	0.656951	5e-05	0.00034525	yes
ENSG00000138496.15	ENSG00000138496.15	PARP9	chr3:122527923-122575203	Prone	Prot	OK	6.19048	12.4719	1.01056	3.44609	5e-05	0.00034525	yes
ENSG00000138172.9	ENSG00000138172.9	CALHM2	chr10:103446785-103452402	Prone	Prot	OK	15.4425	31.1045	1.01021	4.585	5e-05	0.00034525	yes
ENSG00000181019.11	ENSG00000181019.11	NQO1	chr16:69706995-69726951	Prone	Prot	OK	213.45	428.892	1.00672	5.62559	5e-05	0.00034525	yes
ENSG00000119917.12	ENSG00000119917.12	IFIT3	chr10:89213568-89414557	Prone	Prot	OK	2.36417	4.75024	1.00667	1.35048	5e-05	0.00034525	yes
ENSG00000005469.10	ENSG00000005469.10	CROT	chr7:87345680-87399795	Prone	Prot	OK	4.7922	9.57477	0.998551	2.20868	5e-05	0.00034525	yes
ENSG00000100342.19	ENSG00000100342.19	APOL1	chr22:36253009-36267530	Prone	Prot	OK	10.6123	21.1882	0.997518	4.06475	5e-05	0.00034525	yes
ENSG00000168405.13	ENSG00000168405.13	CMAHP	chr6:25081067-25166555	Prone	Prot	OK	2.21164	4.41153	0.996159	2.06536	5e-05	0.00034525	yes
ENSG00000165655.15	ENSG00000165655.15	ZNF503	chr10:75269818-75411842	Prone	Prot	OK	0.686047	1.36807	0.995767	1.51205	5e-05	0.00034525	yes
ENSG00000116106.10	ENSG00000116106.10	EPHA4	chr2:221418026-221574454	Prone	Prot	OK	10.8619	21.6282	0.993637	2.29278	5e-05	0.00034525	yes
ENSG00000155011.7	ENSG00000155011.7	DKK2	chr4:106921801-107301870	Prone	Prot	OK	3.03473	6.0413	0.993291	3.61804	5e-05	0.00034525	yes
ENSG00000165244.6	ENSG00000165244.6	ZNF367	chr9:96385940-96418329	Prone	Prot	OK	0.688302	1.35986	0.982342	2.23906	5e-05	0.00034525	yes
ENSG00000002549.11	ENSG00000002549.11	LAP3	chr4:17577191-17614571	Prone	Prot	OK	52.6661	103.886	0.98006	5.87289	5e-05	0.00034525	yes
ENSG00000099998.16	ENSG00000099998.16	GGT5	chr22:24219653-24245142	Prone	Prot	OK	16.7195	32.9791	0.980018	2.81402	5e-05	0.00034525	yes
ENSG00000250899.3	ENSG00000250899.3	RP11-253E3.3	chr12:3041436-3044950	Prone	Prot	OK	1.27097	2.50245	0.977405	2.8865	5e-05	0.00034525	yes
ENSG00000144230.15	ENSG00000144230.15	GPR17	chr2:127638380-127681786	Prone	Prot	OK	1.18679	2.33516	0.976465	1.15876	5e-05	0.00034525	yes
ENSG00000176454.12	ENSG00000176454.12	LPCAT4	chr15:34358617-34367278	Prone	Prot	OK	10.8026	21.2371	0.975208	3.16888	5e-05	0.00034525	yes
ENSG00000013619.12	ENSG00000013619.12	MAMLD1	chrX:150361421-150514178	Prone	Prot	OK	0.534887	1.05098	0.974428	1.04192	5e-05	0.00034525	yes
ENSG00000187244.9	ENSG00000187244.9	BCAM	chr19:44809058-44821420	Prone	Prot	OK	12.6196	24.7923	0.974226	4.14137	5e-05	0.00034525	yes
ENSG00000186174.11	ENSG00000186174.11	BCL9L	chr11:118883765-118958559	Prone	Prot	OK	2.29173	4.48342	0.968158	1.39015	5e-05	0.00034525	yes
ENSG00000143369.13	ENSG00000143369.13	ECM1	chr1:150508061-150513789	Prone	Prot	OK	1.82327	3.56085	0.965699	2.12637	5e-05	0.00034525	yes
ENSG00000275832.3	ENSG00000275832.3	ARHGAP23	chr17:38428417-38512392	Prone	Prot	OK	8.72648	17.0353	0.96506	2.38593	5e-05	0.00034525	yes
ENSG00000183598.3	ENSG00000183598.3	HIST2H3D	chr1:149813270-149813681	Prone	Prot	OK	6.62567	12.9325	0.964867	1.66956	5e-05	0.00034525	yes
ENSG00000105953.13	ENSG00000105953.13	OGDH	chr7:44606571-44709066	Prone	Prot	OK	12.9355	25.2027	0.962246	4.44329	5e-05	0.00034525	yes
ENSG00000107738.18	ENSG00000107738.18	C10orf54	chr10:71396933-71815947	Prone	Prot	OK	6.26732	12.1888	0.959634	2.14143	5e-05	0.00034525	yes
ENSG00000065057.6	ENSG00000065057.6	NTHL1	chr16:2039814-2135898	Prone	Prot	OK	10.2655	19.9183	0.956292	1.38513	5e-05	0.00034525	yes
ENSG00000060237.15	ENSG00000060237.15	WNK1	chr12:752592-911452	Prone	Prot	OK	12.9302	25.0591	0.954595	2.34016	5e-05	0.00034525	yes
ENSG00000239282.6	ENSG00000239282.6	GATSL3	chr22:30285116-30327046	Prone	Prot	OK	8.30248	16.0824	0.953864	1.92297	5e-05	0.00034525	yes
ENSG00000119714.9	ENSG00000119714.9	GPR68	chr14:91232531-91253925	Prone	Prot	OK	1.07196	2.07457	0.952558	1.57809	5e-05	0.00034525	yes
ENSG00000241472.5	ENSG00000241472.5	PTPRG-AS1	chr3:61561568-62369330	Prone	Prot	OK	6.87592	13.3067	0.952533	0.935589	0.00095	0.00515192	yes
ENSG00000274213.1	ENSG00000274213.1	RP11-670E13.6	chr17:56914185-56914533	Prone	Prot	OK	2.50646	4.85011	0.952365	1.00361	0.00095	0.00515192	yes
ENSG00000084112.13	ENSG00000084112.13	SSH1	chr12:108778143-108857590	Prone	Prot	OK	7.08619	13.7072	0.951856	2.23455	5e-05	0.00034525	yes
ENSG00000127533.3	ENSG00000127533.3	F2RL3	chr19:16888859-16892606	Prone	Prot	OK	4.6562	8.97848	0.947317	1.99011	5e-05	0.00034525	yes
ENSG00000130584.9	ENSG00000130584.9	ZBTB46	chr20:63743665-63831244	Prone	Prot	OK	4.30808	8.29537	0.945262	2.48585	5e-05	0.00034525	yes
ENSG00000130702.12	ENSG00000130702.12	LAMA5	chr20:62302092-62367312	Prone	Prot	OK	19.8197	38.1213	0.943661	1.85907	5e-05	0.00034525	yes
ENSG00000211584.12	ENSG00000211584.12	SLC48A1	chr12:47706084-47837898	Prone	Prot	OK	9.7426	18.7295	0.942931	1.54165	5e-05	0.00034525	yes
ENSG00000182208.11	ENSG00000182208.11	MOB2	chr11:1469456-1501247	Prone	Prot	OK	16.9984	32.6545	0.941884	3.61673	5e-05	0.00034525	yes
ENSG00000262601.1	ENSG00000262601.1	CTC-786C10.1	chr16:85171275-85185363	Prone	Prot	OK	1.23656	2.37389	0.940922	1.27798	0.0001	0.000658879	yes
ENSG00000116016.12	ENSG00000116016.12	EPAS1	chr2:46293666-46386703	Prone	Prot	OK	77.737	149.106	0.939662	4.96818	5e-05	0.00034525	yes
ENSG00000049130.12	ENSG00000049130.12	KITLG	chr12:88492792-88598218	Prone	Prot	OK	4.729	9.06491	0.938759	2.55521	5e-05	0.00034525	yes
ENSG00000184005.10	ENSG00000184005.10	ST6GALNAC3	chr1:76074718-76634601	Prone	Prot	OK	28.7302	55.0704	0.938708	2.62217	5e-05	0.00034525	yes
ENSG00000119669.4	ENSG00000119669.4	IRF2BPL	chr14:77024542-77031572	Prone	Prot	OK	6.97841	13.3749	0.938556	4.30465	5e-05	0.00034525	yes
ENSG00000162783.10	ENSG00000162783.10	IER5	chr1:181088711-181092899	Prone	Prot	OK	6.49055	12.401	0.934049	4.64382	5e-05	0.00034525	yes
ENSG00000254703.2	ENSG00000254703.2	SENCR	chr11:128629652-128813267	Prone	Prot	OK	3.49076	6.66146	0.932296	0.924101	0.0025	0.0121259	yes
ENSG00000173267.12	ENSG00000173267.12	SNCG	chr10:86935539-87024732	Prone	Prot	OK	17.3472	33.0731	0.930959	0.786943	0.0097	0.0382573	yes
ENSG00000167775.9	ENSG00000167775.9	CD320	chr19:7958578-8489114	Prone	Prot	OK	30.472	58.0898	0.9308	1.37201	5e-05	0.00034525	yes
ENSG00000196411.8	ENSG00000196411.8	EPHB4	chr7:100802564-100867009	Prone	Prot	OK	95.658	182.304	0.930391	4.47017	5e-05	0.00034525	yes
ENSG00000197747.7	ENSG00000197747.7	S100A10	chr1:151982914-151994390	Prone	Prot	OK	134.259	255.475	0.928158	5.35103	5e-05	0.00034525	yes
ENSG00000223804.4	ENSG00000223804.4	CH17-472G23.2	chr1:120197084-120341871	Prone	Prot	OK	0.87653	1.66509	0.925723	0.592574	0.01225	0.0467203	yes
ENSG00000099875.13	ENSG00000099875.13	MKNK2	chr19:2037464-2051244	Prone	Prot	OK	62.659	118.826	0.923258	3.25714	5e-05	0.00034525	yes
ENSG00000165269.11	ENSG00000165269.11	AQP7	chr9:33383178-33402682	Prone	Prot	OK	0.883964	1.67518	0.922253	0.696199	5e-05	0.00034525	yes
ENSG00000106077.17	ENSG00000106077.17	ABHD11	chr7:73736093-73738867	Prone	Prot	OK	1.20222	2.27708	0.921491	0.93729	5e-05	0.00034525	yes
ENSG00000079691.16	ENSG00000079691.16	LRRC16A	chr6:25279077-25620530	Prone	Prot	OK	3.40312	6.44535	0.9214	3.61137	5e-05	0.00034525	yes
ENSG00000131149.16	ENSG00000131149.16	GSE1	chr16:85611408-85690073	Prone	Prot	OK	0.99417	1.87828	0.917848	0.934053	0.0001	0.000658879	yes
ENSG00000185551.11	ENSG00000185551.11	NR2F2	chr15:95990581-96340263	Prone	Prot	OK	13.4149	25.3302	0.917019	3.04628	5e-05	0.00034525	yes
ENSG00000197956.8	ENSG00000197956.8	S100A6	chr1:153533602-153536244	Prone	Prot	OK	1010.26	1903.21	0.913707	5.61785	5e-05	0.00034525	yes
ENSG00000150510.14	ENSG00000150510.14	FAM124A	chr13:51222333-51284241	Prone	Prot	OK	1.91059	3.59325	0.911271	2.29651	5e-05	0.00034525	yes
ENSG00000149218.4	ENSG00000149218.4	ENDOD1	chr11:95089809-95132645	Prone	Prot	OK	10.6511	20.0176	0.910259	5.31537	5e-05	0.00034525	yes
ENSG00000240184.5	ENSG00000240184.5	PCDHGC3	chr5:141330570-141512981	Prone	Prot	OK	2.80904	5.2752	0.909151	1.2275	5e-05	0.00034525	yes
ENSG00000169247.10	ENSG00000169247.10	SH3TC2	chr5:148923638-149063163	Prone	Prot	OK	1.5076	2.83015	0.908624	1.1807	5e-05	0.00034525	yes
ENSG00000159314.10	ENSG00000159314.10	ARHGAP27	chr17:45393901-45434421	Prone	Prot	OK	21.144	39.6218	0.906048	2.48739	5e-05	0.00034525	yes
ENSG00000105327.14	ENSG00000105327.14	BBC3	chr19:47220821-47232766	Prone	Prot	OK	13.9748	26.1066	0.901593	3.91899	5e-05	0.00034525	yes
ENSG00000104967.6	ENSG00000104967.6	NOVA2	chr19:45933733-45973546	Prone	Prot	OK	1.22882	2.29175	0.899173	1.16056	5e-05	0.00034525	yes
ENSG00000185650.9	ENSG00000185650.9	ZFP36L1	chr14:68787659-68796253	Prone	Prot	OK	11.6879	21.7823	0.898137	3.09207	5e-05	0.00034525	yes
ENSG00000168309.15	ENSG00000168309.15	FAM107A	chr3:58564116-58666848	Prone	Prot	OK	4.40552	8.1936	0.895186	3.32068	5e-05	0.00034525	yes
ENSG00000179044.14	ENSG00000179044.14	EXOC3L1	chr16:67184365-67190204	Prone	Prot	OK	2.96896	5.51743	0.894041	2.20857	5e-05	0.00034525	yes
ENSG00000185070.9	ENSG00000185070.9	FLRT2	chr14:85530143-85654426	Prone	Prot	OK	32.5763	60.5376	0.894007	2.08873	5e-05	0.00034525	yes
ENSG00000137880.5	ENSG00000137880.5	GCHFR	chr15:40764019-40815084	Prone	Prot	OK	3.52956	6.55285	0.892635	1.00922	0.0003	0.00181001	yes
ENSG00000137731.12	ENSG00000137731.12	FXYD2	chr11:117427772-117877486	Prone	Prot	OK	3.46388	6.37893	0.880924	1.2707	5e-05	0.00034525	yes
ENSG00000167549.17	ENSG00000167549.17	CORO6	chr17:29560546-30186475	Prone	Prot	OK	3.91106	7.20154	0.880747	0.931512	0.00155	0.00793573	yes
ENSG00000152137.5	ENSG00000152137.5	HSPB8	chr12:119178641-119221131	Prone	Prot	OK	2.34996	4.31587	0.877018	2.23795	5e-05	0.00034525	yes
ENSG00000085563.13	ENSG00000085563.13	ABCB1	chr7:87503632-87832296	Prone	Prot	OK	4.97415	9.1333	0.876686	1.68034	5e-05	0.00034525	yes
ENSG00000132481.5	ENSG00000132481.5	TRIM47	chr17:75874160-75879546	Prone	Prot	OK	25.4096	46.5603	0.873725	3.11144	5e-05	0.00034525	yes
ENSG00000138411.9	ENSG00000138411.9	HECW2	chr2:196194369-196593692	Prone	Prot	OK	17.3833	31.8445	0.873346	2.7967	5e-05	0.00034525	yes
ENSG00000103811.14	ENSG00000103811.14	CTSH	chr15:78921057-78949574	Prone	Prot	OK	2.16923	3.96649	0.870676	1.17672	5e-05	0.00034525	yes
ENSG00000132840.8	ENSG00000132840.8	BHMT2	chr5:78997605-79236038	Prone	Prot	OK	0.539239	0.984761	0.868849	0.589944	0.00095	0.00515192	yes
ENSG00000143669.12	ENSG00000143669.12	LYST	chr1:235661040-235883640	Prone	Prot	OK	3.221	5.88084	0.868512	1.73116	5e-05	0.00034525	yes
ENSG00000121060.13	ENSG00000121060.13	TRIM25	chr17:56887908-56914038	Prone	Prot	OK	19.2688	35.1746	0.868271	2.30665	5e-05	0.00034525	yes
ENSG00000180096.10	ENSG00000180096.10	2016-09-01	chr16:30378105-30400108	Prone	Prot	OK	0.690527	1.2601	0.86777	0.550453	0.0128	0.0483731	yes
ENSG00000186480.11	ENSG00000186480.11	INSIG1	chr7:155297775-155310235	Prone	Prot	OK	16.0749	29.3244	0.867291	3.80347	5e-05	0.00034525	yes
ENSG00000167994.10	ENSG00000167994.10	RAB3IL1	chr11:61897300-61920269	Prone	Prot	OK	0.722666	1.31812	0.867085	0.614968	0.0011	0.00587723	yes
ENSG00000112759.15	ENSG00000112759.15	SLC29A1	chr6:44219504-44234151	Prone	Prot	OK	63.4913	115.698	0.865734	5.28343	5e-05	0.00034525	yes
ENSG00000262112.1	ENSG00000262112.1	RP11-670E13.5	chr17:56887908-56914038	Prone	Prot	OK	8.28281	15.0864	0.865053	0.908223	0.0022	0.0108159	yes
ENSG00000169851.14	ENSG00000169851.14	PCDH7	chr4:30720414-31146805	Prone	Prot	OK	5.37167	9.77777	0.864133	2.44753	5e-05	0.00034525	yes
ENSG00000100906.9	ENSG00000100906.9	NFKBIA	chr14:35401510-35404749	Prone	Prot	OK	59.7265	108.64	0.863118	4.49522	5e-05	0.00034525	yes
ENSG00000178726.6	ENSG00000178726.6	THBD	chr20:23045632-23049741	Prone	Prot	OK	14.6135	26.5728	0.862651	4.82381	5e-05	0.00034525	yes
ENSG00000142669.12	ENSG00000142669.12	SH3BGRL3	chr1:26279175-26320523	Prone	Prot	OK	35.6392	64.7653	0.861755	3.68611	5e-05	0.00034525	yes
ENSG00000136237.17	ENSG00000136237.17	RAPGEF5	chr7:22118237-22357144	Prone	Prot	OK	56.1979	101.95	0.859273	2.94344	5e-05	0.00034525	yes
ENSG00000068724.14	ENSG00000068724.14	TTC7A	chr2:46899274-47176601	Prone	Prot	OK	5.47164	9.92392	0.858936	0.843247	0.0031	0.0145458	yes
ENSG00000134072.9	ENSG00000134072.9	CAMK1	chr3:9749943-9855138	Prone	Prot	OK	8.92163	16.1776	0.858616	1.43141	5e-05	0.00034525	yes
ENSG00000100106.18	ENSG00000100106.18	TRIOBP	chr22:37681672-37776556	Prone	Prot	OK	23.489	42.529	0.856465	3.77571	5e-05	0.00034525	yes
ENSG00000216775.2	ENSG00000216775.2	RP1-152L7.5	chr6:52665147-52669155	Prone	Prot	OK	1.01774	1.84061	0.854818	1.21477	5e-05	0.00034525	yes
ENSG00000142227.9	ENSG00000142227.9	EMP3	chr19:48296456-48330553	Prone	Prot	OK	40.1928	72.6093	0.853217	3.58913	5e-05	0.00034525	yes
ENSG00000156384.13	ENSG00000156384.13	SFR1	chr10:104122057-104126385	Prone	Prot	OK	5.94489	10.7179	0.850299	2.596	5e-05	0.00034525	yes
ENSG00000126603.7	ENSG00000126603.7	GLIS2	chr16:4314760-4425705	Prone	Prot	OK	0.827676	1.49182	0.849936	0.995238	0.0016	0.00817095	yes
ENSG00000185567.6	ENSG00000185567.6	AHNAK2	chr14:104924815-104978357	Prone	Prot	OK	19.878	35.8149	0.849392	4.03351	5e-05	0.00034525	yes
ENSG00000197457.8	ENSG00000197457.8	STMN3	chr20:63639704-63653427	Prone	Prot	OK	1.22776	2.208	0.846709	1.77523	5e-05	0.00034525	yes
ENSG00000164512.16	ENSG00000164512.16	ANKRD55	chr5:56099677-56233359	Prone	Prot	OK	0.676469	1.21582	0.845833	0.8243	5e-05	0.00034525	yes
ENSG00000139117.12	ENSG00000139117.12	CPNE8	chr12:38646821-38909592	Prone	Prot	OK	8.61036	15.465	0.844862	2.21668	5e-05	0.00034525	yes
ENSG00000175183.8	ENSG00000175183.8	CSRP2	chr12:76858714-76880352	Prone	Prot	OK	3.22659	5.78367	0.841974	1.68947	5e-05	0.00034525	yes
ENSG00000129007.13	ENSG00000129007.13	CALML4	chr15:68054178-68257211	Prone	Prot	OK	1.84165	3.3004	0.841639	0.986209	0.00115	0.00610734	yes
ENSG00000170801.8	ENSG00000170801.8	HTRA3	chr4:8269764-8307111	Prone	Prot	OK	8.64934	15.492	0.840864	3.79321	5e-05	0.00034525	yes
ENSG00000120820.11	ENSG00000120820.11	GLT8D2	chr12:103988983-104064183	Prone	Prot	OK	3.40513	6.09555	0.840048	2.19702	5e-05	0.00034525	yes
ENSG00000267100.1	ENSG00000267100.1	ILF3-AS1	chr19:10651861-10653844	Prone	Prot	OK	1.25288	2.23979	0.838112	1.91207	5e-05	0.00034525	yes
ENSG00000064651.12	ENSG00000064651.12	SLC12A2	chr5:128083765-128189688	Prone	Prot	OK	13.2719	23.7219	0.837838	3.53849	5e-05	0.00034525	yes
ENSG00000068001.12	ENSG00000068001.12	HYAL2	chr3:50317789-50328251	Prone	Prot	OK	193.781	345.694	0.835069	4.94771	5e-05	0.00034525	yes
ENSG00000223361.5	ENSG00000223361.5	FTH1P10	chr5:17353694-17354899	Prone	Prot	OK	1.10424	1.96888	0.834321	1.25993	5e-05	0.00034525	yes
ENSG00000109654.13	ENSG00000109654.13	TRIM2	chr4:153152341-153339320	Prone	Prot	OK	3.54454	6.31978	0.834277	1.90366	5e-05	0.00034525	yes
ENSG00000130522.5	ENSG00000130522.5	JUND	chr19:18279759-18281622	Prone	Prot	OK	11.9342	21.2259	0.830724	3.15242	5e-05	0.00034525	yes
ENSG00000279312.1	ENSG00000279312.1	RP3-331H24.7	chr6:71221456-71420769	Prone	Prot	OK	1.83837	3.26546	0.828859	1.18277	5e-05	0.00034525	yes
ENSG00000079432.6	ENSG00000079432.6	CIC	chr19:42268536-42295797	Prone	Prot	OK	8.24574	14.6239	0.82661	2.07021	5e-05	0.00034525	yes
ENSG00000117643.13	ENSG00000117643.13	MAN1C1	chr1:25617467-25786207	Prone	Prot	OK	5.23412	9.27149	0.824853	3.17712	5e-05	0.00034525	yes
ENSG00000180998.10	ENSG00000180998.10	GPR137C	chr14:52553147-52637713	Prone	Prot	OK	0.589582	1.04353	0.823702	1.09253	5e-05	0.00034525	yes
ENSG00000269926.1	ENSG00000269926.1	RP11-442H21.2	chr10:72273919-72276036	Prone	Prot	OK	95.0991	168.247	0.823081	3.45926	5e-05	0.00034525	yes
ENSG00000170522.8	ENSG00000170522.8	ELOVL6	chr4:110045845-110199199	Prone	Prot	OK	1.84803	3.26619	0.821622	0.671836	0.00325	0.0151138	yes
ENSG00000162520.13	ENSG00000162520.13	SYNC	chr1:32651141-32703596	Prone	Prot	OK	6.73603	11.892	0.820027	2.27878	5e-05	0.00034525	yes
ENSG00000104381.11	ENSG00000104381.11	GDAP1	chr8:74234699-74488872	Prone	Prot	OK	0.642479	1.13274	0.818097	0.550789	0.00065	0.00366161	yes
ENSG00000171522.5	ENSG00000171522.5	PTGER4	chr5:40679497-40693735	Prone	Prot	OK	4.01733	7.07928	0.817366	1.90412	5e-05	0.00034525	yes
ENSG00000013563.12	ENSG00000013563.12	DNASE1L1	chrX:154389954-154421726	Prone	Prot	OK	28.5378	50.2809	0.817136	1.10229	5e-05	0.00034525	yes
ENSG00000226564.1	ENSG00000226564.1	FTH1P20	chr2:180571711-180916939	Prone	Prot	OK	1.62697	2.8656	0.816653	1.17176	5e-05	0.00034525	yes
ENSG00000130589.15	ENSG00000130589.15	HELZ2	chr20:63558085-63574239	Prone	Prot	OK	6.10123	10.7444	0.816412	2.00281	5e-05	0.00034525	yes
ENSG00000139190.15	ENSG00000139190.15	VAMP1	chr12:6439000-6470987	Prone	Prot	OK	0.904567	1.59287	0.816331	0.728508	0.00075	0.00417984	yes
ENSG00000234975.6	ENSG00000234975.6	FTH1P2	chr1:228687414-228687826	Prone	Prot	OK	2.10013	3.69533	0.815221	1.10936	0.00035	0.00208052	yes
ENSG00000111077.16	ENSG00000111077.16	TNS2	chr12:53006157-53079420	Prone	Prot	OK	35.6601	62.7077	0.81433	0.724052	5e-05	0.00034525	yes
ENSG00000206417.7	ENSG00000206417.7	H1FX-AS1	chr3:129314770-129326225	Prone	Prot	OK	1.81006	3.17884	0.812465	0.804015	0.0069	0.0287076	yes
ENSG00000164136.15	ENSG00000164136.15	IL15	chr4:141636598-141733987	Prone	Prot	OK	1.87948	3.30012	0.812182	1.34448	5e-05	0.00034525	yes
ENSG00000186377.7	ENSG00000186377.7	CYP4X1	chr1:47023567-47050751	Prone	Prot	OK	2.30614	4.04727	0.811471	2.07415	5e-05	0.00034525	yes
ENSG00000127824.12	ENSG00000127824.12	TUBA4A	chr2:219229756-219278170	Prone	Prot	OK	6.1405	10.7645	0.809858	1.4013	5e-05	0.00034525	yes
ENSG00000125864.10	ENSG00000125864.10	BFSP1	chr20:17493904-17569220	Prone	Prot	OK	2.49257	4.36635	0.808792	2.30491	5e-05	0.00034525	yes
ENSG00000119862.11	ENSG00000119862.11	LGALSL	chr2:64453968-64461381	Prone	Prot	OK	2.41783	4.22439	0.805033	1.7712	5e-05	0.00034525	yes
ENSG00000275322.1	ENSG00000275322.1	RP11-262A16.1	chr15:96342952-96345651	Prone	Prot	OK	0.993833	1.73584	0.804555	1.23958	5e-05	0.00034525	yes
ENSG00000167779.6	ENSG00000167779.6	IGFBP6	chr12:53097435-53102345	Prone	Prot	OK	3.95713	6.89058	0.800173	1.58325	5e-05	0.00034525	yes
ENSG00000168386.17	ENSG00000168386.17	FILIP1L	chr3:99817833-100178603	Prone	Prot	OK	7.13399	12.4214	0.800047	3.12653	5e-05	0.00034525	yes
ENSG00000170917.12	ENSG00000170917.12	NUDT6	chr4:122826707-122922968	Prone	Prot	OK	6.43665	11.2035	0.799569	1.58418	5e-05	0.00034525	yes
ENSG00000128656.12	ENSG00000128656.12	CHN1	chr2:174799362-175005369	Prone	Prot	OK	8.01716	13.937	0.797758	2.46427	5e-05	0.00034525	yes
ENSG00000198743.5	ENSG00000198743.5	SLC5A3	chr21:34073223-34360033	Prone	Prot	OK	4.43286	7.69683	0.796026	4.00929	5e-05	0.00034525	yes
ENSG00000131196.16	ENSG00000131196.16	NFATC1	chr18:79395855-79529325	Prone	Prot	OK	5.48456	9.52262	0.795981	2.21549	5e-05	0.00034525	yes
ENSG00000179094.12	ENSG00000179094.12	PER1	chr17:8140471-8163546	Prone	Prot	OK	4.49585	7.78549	0.792195	1.23106	5e-05	0.00034525	yes
ENSG00000162817.6	ENSG00000162817.6	C1orf115	chr1:220689844-220699157	Prone	Prot	OK	12.1224	20.9915	0.792134	4.40392	5e-05	0.00034525	yes
ENSG00000001460.16	ENSG00000001460.16	STPG1	chr1:24307555-24472976	Prone	Prot	OK	2.02533	3.50278	0.790342	1.05857	5e-05	0.00034525	yes
ENSG00000197694.12	ENSG00000197694.12	SPTAN1	chr9:128552557-128656787	Prone	Prot	OK	64.8659	112.122	0.789541	1.75579	5e-05	0.00034525	yes
ENSG00000278921.2	ENSG00000278921.2	EPB41L4A-AS2	chr5:112419582-112420978	Prone	Prot	OK	1.5236	2.63345	0.789468	1.17004	0.0001	0.000658879	yes
ENSG00000170545.15	ENSG00000170545.15	SMAGP	chr12:51238291-51271362	Prone	Prot	OK	7.08791	12.2489	0.789217	1.18657	0.0001	0.000658879	yes
ENSG00000137310.10	ENSG00000137310.10	TCF19	chr6:31158541-31180731	Prone	Prot	OK	2.2847	3.94435	0.787784	1.91427	5e-05	0.00034525	yes
ENSG00000204388.6	ENSG00000204388.6	HSPA1B	chr6:31827734-31830255	Prone	Prot	OK	4.17739	7.2045	0.786297	3.16424	5e-05	0.00034525	yes
ENSG00000182492.14	ENSG00000182492.14	BGN	chrX:153444719-153509554	Prone	Prot	OK	26.5136	45.7082	0.785722	3.67563	5e-05	0.00034525	yes
ENSG00000111331.11	ENSG00000111331.11	OAS3	chr12:112906776-113017751	Prone	Prot	OK	2.09239	3.60526	0.784952	1.12114	5e-05	0.00034525	yes
ENSG00000276903.1	ENSG00000276903.1	HIST1H2AL	chr6:27837759-27865798	Prone	Prot	OK	13.4294	23.1294	0.784332	1.1187	0.00025	0.00153863	yes
ENSG00000065357.18	ENSG00000065357.18	DGKA	chr12:55901412-55954027	Prone	Prot	OK	11.9863	20.6431	0.784275	1.77487	5e-05	0.00034525	yes
ENSG00000173218.13	ENSG00000173218.13	VANGL1	chr1:115641952-115698224	Prone	Prot	OK	6.38094	10.9883	0.784127	2.43835	5e-05	0.00034525	yes
ENSG00000137959.14	ENSG00000137959.14	IFI44L	chr1:78619921-78646145	Prone	Prot	OK	1.45734	2.50745	0.782879	0.980568	0.0001	0.000658879	yes
ENSG00000005884.16	ENSG00000005884.16	ITGA3	chr17:50055967-50090481	Prone	Prot	OK	37.7354	64.9183	0.782707	2.826	5e-05	0.00034525	yes
ENSG00000204136.9	ENSG00000204136.9	GGTA1P	chr9:121375240-121500027	Prone	Prot	OK	0.709105	1.21806	0.780515	1.1698	5e-05	0.00034525	yes
ENSG00000250510.6	ENSG00000250510.6	GPR162	chr12:6821544-6839851	Prone	Prot	OK	7.95569	13.6585	0.779742	1.50938	5e-05	0.00034525	yes
ENSG00000096060.13	ENSG00000096060.13	FKBP5	chr6:35573584-35728583	Prone	Prot	OK	8.10303	13.8978	0.77832	4.21247	5e-05	0.00034525	yes
ENSG00000126878.11	ENSG00000126878.11	AIF1L	chr9:131096475-131123152	Prone	Prot	OK	31.4084	53.861	0.778091	4.55206	5e-05	0.00034525	yes
ENSG00000116133.10	ENSG00000116133.10	DHCR24	chr1:54849632-54888850	Prone	Prot	OK	10.5709	18.1174	0.777277	4.01824	5e-05	0.00034525	yes
ENSG00000182173.11	ENSG00000182173.11	TSEN54	chr17:75516059-75524739	Prone	Prot	OK	6.21958	10.644	0.775149	1.66354	5e-05	0.00034525	yes
ENSG00000078596.9	ENSG00000078596.9	ITM2A	chrX:79360383-79367667	Prone	Prot	OK	3.38556	5.79383	0.775121	1.58371	5e-05	0.00034525	yes
ENSG00000107872.11	ENSG00000107872.11	FBXL15	chr10:102402616-102423136	Prone	Prot	OK	2.32275	3.97437	0.774894	1.15913	5e-05	0.00034525	yes
ENSG00000173442.10	ENSG00000173442.10	EHBP1L1	chr11:65576037-65650930	Prone	Prot	OK	9.45785	16.1796	0.774588	1.44399	5e-05	0.00034525	yes
ENSG00000188157.12	ENSG00000188157.12	AGRN	chr1:1020122-1056118	Prone	Prot	OK	20.0884	34.3388	0.773478	2.11237	5e-05	0.00034525	yes
ENSG00000165949.11	ENSG00000165949.11	IFI27	chr14:94104835-94116698	Prone	Prot	OK	263.952	450.894	0.772513	4.29412	5e-05	0.00034525	yes
ENSG00000185347.16	ENSG00000185347.16	C14orf80	chr14:105486316-105499575	Prone	Prot	OK	2.50501	4.27282	0.770371	1.01591	5e-05	0.00034525	yes
ENSG00000144959.8	ENSG00000144959.8	NCEH1	chr3:172630248-172711218	Prone	Prot	OK	3.22431	5.49799	0.769912	2.20988	5e-05	0.00034525	yes
ENSG00000123473.14	ENSG00000123473.14	STIL	chr1:47250138-47314147	Prone	Prot	OK	1.91842	3.27074	0.769696	1.52021	5e-05	0.00034525	yes
ENSG00000167992.11	ENSG00000167992.11	VWCE	chr11:61258285-61295424	Prone	Prot	OK	3.11709	5.30933	0.768331	1.33433	5e-05	0.00034525	yes
ENSG00000185480.10	ENSG00000185480.10	PARPBP	chr12:102120184-102480645	Prone	Prot	OK	1.93013	3.28712	0.768127	0.788047	0.0105	0.0408301	yes
ENSG00000144815.13	ENSG00000144815.13	NXPE3	chr3:101779201-101861022	Prone	Prot	OK	6.01874	10.2473	0.767708	1.96914	5e-05	0.00034525	yes
ENSG00000123146.18	ENSG00000123146.18	CD97	chr19:14380500-14408725	Prone	Prot	OK	1.92499	3.27384	0.766136	0.893183	5e-05	0.00034525	yes
ENSG00000114861.17	ENSG00000114861.17	FOXP1	chr3:70954692-71628558	Prone	Prot	OK	17.1742	29.1352	0.76252	2.23911	5e-05	0.00034525	yes
ENSG00000019991.14	ENSG00000019991.14	HGF	chr7:81699005-81770438	Prone	Prot	OK	1.19751	2.02875	0.760548	1.06325	5e-05	0.00034525	yes
ENSG00000178209.13	ENSG00000178209.13	PLEC	chr8:143915146-143976734	Prone	Prot	OK	38.0114	64.3895	0.760394	2.71721	5e-05	0.00034525	yes
ENSG00000128578.8	ENSG00000128578.8	STRIP2	chr7:129434432-129488399	Prone	Prot	OK	1.45749	2.46694	0.759238	1.70088	5e-05	0.00034525	yes
ENSG00000079102.15	ENSG00000079102.15	RUNX1T1	chr8:91954966-92103286	Prone	Prot	OK	4.20292	7.11326	0.759121	1.14416	5e-05	0.00034525	yes
ENSG00000152642.9	ENSG00000152642.9	GPD1L	chr3:32105688-32168713	Prone	Prot	OK	5.51389	9.31693	0.756785	3.04355	5e-05	0.00034525	yes
ENSG00000253368.3	ENSG00000253368.3	TRNP1	chr1:26993706-27000898	Prone	Prot	OK	5.18215	8.75636	0.75678	2.01545	5e-05	0.00034525	yes
ENSG00000240499.6	ENSG00000240499.6	RP5-1101C3.1	chr7:122318424-122886759	Prone	Prot	OK	0.72938	1.23237	0.756693	0.234636	0.0052	0.0226716	yes
ENSG00000197905.7	ENSG00000197905.7	TEAD4	chr12:2959329-3040673	Prone	Prot	OK	14.9741	25.2896	0.756076	2.67734	5e-05	0.00034525	yes
ENSG00000140853.14	ENSG00000140853.14	NLRC5	chr16:56989484-57083531	Prone	Prot	OK	6.86142	11.5682	0.75358	1.49762	5e-05	0.00034525	yes
ENSG00000185339.7	ENSG00000185339.7	TCN2	chr22:30576624-30627278	Prone	Prot	OK	87.7239	147.762	0.752235	3.95405	5e-05	0.00034525	yes
ENSG00000261308.1	ENSG00000261308.1	FIGNL2	chr12:51820458-51822415	Prone	Prot	OK	0.610525	1.02833	0.752186	0.866315	0.00315	0.0147509	yes
ENSG00000091409.13	ENSG00000091409.13	ITGA6	chr2:172427353-172608669	Prone	Prot	OK	45.4313	76.5138	0.752034	2.89361	5e-05	0.00034525	yes
ENSG00000128567.15	ENSG00000128567.15	PODXL	chr7:131500261-131558217	Prone	Prot	OK	89.5961	150.806	0.751184	3.54947	5e-05	0.00034525	yes
ENSG00000175899.13	ENSG00000175899.13	A2M	chr12:9065176-9116229	Prone	Prot	OK	12.9846	21.8432	0.75038	2.44113	5e-05	0.00034525	yes
ENSG00000221963.5	ENSG00000221963.5	APOL6	chr22:35648394-35668409	Prone	Prot	OK	1.6522	2.77918	0.750267	3.53053	5e-05	0.00034525	yes
ENSG00000164048.12	ENSG00000164048.12	ZNF589	chr3:48241099-48301685	Prone	Prot	OK	2.34203	3.93708	0.74937	1.72412	5e-05	0.00034525	yes
ENSG00000108840.14	ENSG00000108840.14	HDAC5	chr17:44076745-44123702	Prone	Prot	OK	18.3449	30.8149	0.748247	2.07139	5e-05	0.00034525	yes
ENSG00000272092.1	ENSG00000272092.1	RP11-350N15.5	chr8:38382363-38383461	Prone	Prot	OK	0.609845	1.0222	0.74516	0.834602	0.0073	0.0300877	yes
ENSG00000133800.7	ENSG00000133800.7	LYVE1	chr11:10541271-10693988	Prone	Prot	OK	14.2343	23.8552	0.744939	2.73892	5e-05	0.00034525	yes
ENSG00000103034.13	ENSG00000103034.13	NDRG4	chr16:58462845-58513628	Prone	Prot	OK	45.0425	75.4238	0.743732	2.8118	5e-05	0.00034525	yes
ENSG00000184292.6	ENSG00000184292.6	TACSTD2	chr1:58575422-58577773	Prone	Prot	OK	3.54878	5.93661	0.742313	2.35869	5e-05	0.00034525	yes
ENSG00000120156.19	ENSG00000120156.19	TEK	chr9:27109140-27230175	Prone	Prot	OK	38.2785	63.9874	0.741253	4.70748	5e-05	0.00034525	yes
ENSG00000267598.1	ENSG00000267598.1	CTC-250I14.6	chr19:13150414-13154908	Prone	Prot	OK	18.0069	30.0793	0.740222	1.39367	5e-05	0.00034525	yes
ENSG00000197381.14	ENSG00000197381.14	ADARB1	chr21:45070951-45226560	Prone	Prot	OK	7.5031	12.5255	0.739314	1.61414	5e-05	0.00034525	yes
ENSG00000073350.12	ENSG00000073350.12	LLGL2	chr17:75525079-75575208	Prone	Prot	OK	4.11026	6.85767	0.738487	1.24921	5e-05	0.00034525	yes
ENSG00000101057.14	ENSG00000101057.14	MYBL2	chr20:43667018-43716496	Prone	Prot	OK	1.72876	2.88326	0.737966	2.30323	5e-05	0.00034525	yes
ENSG00000150347.13	ENSG00000150347.13	ARID5B	chr10:61901299-62096944	Prone	Prot	OK	1.13267	1.88808	0.737198	2.66095	5e-05	0.00034525	yes
ENSG00000145990.9	ENSG00000145990.9	GFOD1	chr6:13357829-13487662	Prone	Prot	OK	9.77778	16.2889	0.736308	3.44703	5e-05	0.00034525	yes
ENSG00000233237.5	ENSG00000233237.5	LINC00472	chr6:71221456-71420769	Prone	Prot	OK	5.04363	8.40198	0.736267	1.32183	5e-05	0.00034525	yes
ENSG00000063438.15	ENSG00000063438.15	AHRR	chr5:271620-438291	Prone	Prot	OK	3.34686	5.57391	0.735883	0.868698	0.00035	0.00208052	yes
ENSG00000141933.8	ENSG00000141933.8	TPGS1	chr19:489175-519654	Prone	Prot	OK	6.34588	10.5634	0.735177	1.80108	5e-05	0.00034525	yes
ENSG00000125618.15	ENSG00000125618.15	PAX8	chr2:113211521-113278950	Prone	Prot	OK	1.42929	2.37857	0.734796	0.704311	0.00295	0.013944	yes
ENSG00000087274.15	ENSG00000087274.15	ADD1	chr4:2843856-2930076	Prone	Prot	OK	66.7676	111.11	0.73477	2.87041	5e-05	0.00034525	yes
ENSG00000169554.15	ENSG00000169554.15	ZEB2	chr2:144384080-144524583	Prone	Prot	OK	6.59501	10.9742	0.734667	2.00746	5e-05	0.00034525	yes
ENSG00000145220.12	ENSG00000145220.12	LYAR	chr4:4267700-4290169	Prone	Prot	OK	4.84451	8.05985	0.734403	2.6821	5e-05	0.00034525	yes
ENSG00000109689.13	ENSG00000109689.13	STIM2	chr4:26857677-27025381	Prone	Prot	OK	5.8017	9.65217	0.734378	1.68623	5e-05	0.00034525	yes
ENSG00000126453.8	ENSG00000126453.8	BCL2L12	chr19:49659568-49673916	Prone	Prot	OK	3.09195	5.14144	0.733656	0.802921	0.00105	0.00563785	yes
ENSG00000115306.14	ENSG00000115306.14	SPTBN1	chr2:54456284-54680045	Prone	Prot	OK	143.75	238.923	0.732985	3.1949	5e-05	0.00034525	yes
ENSG00000137404.13	ENSG00000137404.13	NRM	chr6:30688046-30691420	Prone	Prot	OK	4.94175	8.20757	0.731934	2.01187	5e-05	0.00034525	yes
ENSG00000250802.5	ENSG00000250802.5	ZBED3-AS1	chr5:77072071-77166909	Prone	Prot	OK	1.52592	2.53408	0.731781	0.750474	0.0004	0.00235	yes
ENSG00000149639.13	ENSG00000149639.13	SOGA1	chr20:36777441-36863686	Prone	Prot	OK	2.58417	4.29078	0.731539	1.90537	5e-05	0.00034525	yes
ENSG00000232133.1	ENSG00000232133.1	IMPDH1P10	chr2:201116103-201176687	Prone	Prot	OK	6.82323	11.3244	0.730904	0.94937	0.00145	0.00748353	yes
ENSG00000253846.2	ENSG00000253846.2	PCDHGA10	chr5:141330570-141512981	Prone	Prot	OK	1.69573	2.81051	0.72893	1.04276	0.00085	0.00467616	yes
ENSG00000166387.10	ENSG00000166387.10	PPFIBP2	chr11:7513297-7657127	Prone	Prot	OK	1.74348	2.88869	0.728448	0.617227	0.00015	0.000961801	yes
ENSG00000136235.14	ENSG00000136235.14	GPNMB	chr7:23235966-23275108	Prone	Prot	OK	1.13085	1.87352	0.728344	0.668861	5e-05	0.00034525	yes
ENSG00000135547.7	ENSG00000135547.7	HEY2	chr6:125578557-125761269	Prone	Prot	OK	2.94952	4.88315	0.727331	2.49535	5e-05	0.00034525	yes
ENSG00000213689.8	ENSG00000213689.8	TREX1	chr3:48446709-48467645	Prone	Prot	OK	7.06465	11.6882	0.726365	1.31106	5e-05	0.00034525	yes
ENSG00000115290.8	ENSG00000115290.8	GRB14	chr2:164492811-164621848	Prone	Prot	OK	2.59102	4.28363	0.725314	1.07215	0.00025	0.00153863	yes
ENSG00000167513.7	ENSG00000167513.7	CDT1	chr16:88803212-88809258	Prone	Prot	OK	1.76667	2.91991	0.724891	1.11204	0.0001	0.000658879	yes
ENSG00000135919.11	ENSG00000135919.11	SERPINE2	chr2:223975111-224039319	Prone	Prot	OK	22.0494	36.4418	0.724855	3.93408	5e-05	0.00034525	yes
ENSG00000108262.14	ENSG00000108262.14	GIT1	chr17:29560546-30186475	Prone	Prot	OK	16.7486	27.6537	0.723428	1.83949	5e-05	0.00034525	yes
ENSG00000171658.7	ENSG00000171658.7	RP11-443P15.2	chr3:185959942-185980872	Prone	Prot	OK	2.35027	3.87893	0.722834	1.18959	5e-05	0.00034525	yes
ENSG00000196876.12	ENSG00000196876.12	SCN8A	chr12:51590265-51812864	Prone	Prot	OK	0.982046	1.61973	0.721887	0.663635	0.0064	0.0269615	yes
ENSG00000119673.13	ENSG00000119673.13	ACOT2	chr14:73567619-73575658	Prone	Prot	OK	2.51104	4.13943	0.721148	1.63706	5e-05	0.00034525	yes
ENSG00000160111.11	ENSG00000160111.11	CPAMD8	chr19:16892946-17026815	Prone	Prot	OK	1.60861	2.64759	0.718862	0.797468	5e-05	0.00034525	yes
ENSG00000129116.16	ENSG00000129116.16	PALLD	chr4:168356734-169010275	Prone	Prot	OK	0.775268	1.27512	0.717864	0.416839	0.0014	0.0072467	yes
ENSG00000024422.10	ENSG00000024422.10	EHD2	chr19:47607523-47743134	Prone	Prot	OK	13.9251	22.8456	0.714226	3.25936	5e-05	0.00034525	yes
ENSG00000063660.7	ENSG00000063660.7	GPC1	chr2:240435670-240468078	Prone	Prot	OK	12.1647	19.9555	0.714086	2.28805	5e-05	0.00034525	yes
ENSG00000133321.9	ENSG00000133321.9	RARRES3	chr11:63536808-63546462	Prone	Prot	OK	2.18283	3.57718	0.712622	1.23119	5e-05	0.00034525	yes
ENSG00000171813.12	ENSG00000171813.12	PWWP2B	chr10:132397167-132417863	Prone	Prot	OK	3.83665	6.28453	0.71196	2.31963	5e-05	0.00034525	yes
ENSG00000204389.9	ENSG00000204389.9	HSPA1A	chr6:31815463-31817946	Prone	Prot	OK	5.7648	9.44147	0.711741	2.9089	5e-05	0.00034525	yes
ENSG00000197852.9	ENSG00000197852.9	FAM212B	chr1:111483347-111768016	Prone	Prot	OK	2.63094	4.30721	0.711174	0.965898	0.00085	0.00467616	yes
ENSG00000136114.14	ENSG00000136114.14	THSD1	chr13:52377166-52406494	Prone	Prot	OK	7.95972	13.0268	0.710689	3.66165	5e-05	0.00034525	yes
ENSG00000152689.16	ENSG00000152689.16	RASGRP3	chr2:33436323-33564750	Prone	Prot	OK	28.4099	46.492	0.710587	2.16629	5e-05	0.00034525	yes
ENSG00000159423.15	ENSG00000159423.15	ALDH4A1	chr1:18839598-18956686	Prone	Prot	OK	5.41552	8.85891	0.71003	1.92448	5e-05	0.00034525	yes
ENSG00000225190.7	ENSG00000225190.7	PLEKHM1	chr17:45435899-45490749	Prone	Prot	OK	14.8652	24.3112	0.709679	1.66791	5e-05	0.00034525	yes
ENSG00000141232.4	ENSG00000141232.4	TOB1	chr17:50862222-50910232	Prone	Prot	OK	4.00417	6.54236	0.708309	2.46614	5e-05	0.00034525	yes
ENSG00000138642.13	ENSG00000138642.13	HERC6	chr4:88378738-88443111	Prone	Prot	OK	1.84392	3.01253	0.708201	1.21573	5e-05	0.00034525	yes
ENSG00000149782.10	ENSG00000149782.10	PLCB3	chr11:64251522-64269150	Prone	Prot	OK	18.328	29.9	0.706096	2.5911	5e-05	0.00034525	yes
ENSG00000154122.11	ENSG00000154122.11	ANKH	chr5:14704803-14871778	Prone	Prot	OK	6.77234	11.0474	0.705985	1.2954	5e-05	0.00034525	yes
ENSG00000092929.10	ENSG00000092929.10	UNC13D	chr17:75827224-75844717	Prone	Prot	OK	1.78674	2.91415	0.705747	0.715858	0.0005	0.00287873	yes
ENSG00000196562.13	ENSG00000196562.13	SULF2	chr20:47501901-47786616	Prone	Prot	OK	36.0126	58.6042	0.7025	2.05094	5e-05	0.00034525	yes
ENSG00000146410.10	ENSG00000146410.10	MTFR2	chr6:136231023-136250335	Prone	Prot	OK	0.64874	1.05515	0.70173	0.526368	0.0042	0.0188779	yes
ENSG00000271225.1	ENSG00000271225.1	BNIP3P4	chr9:64810864-64811429	Prone	Prot	OK	1.28702	2.09294	0.701495	0.955634	0.00185	0.00926643	yes
ENSG00000276045.1	ENSG00000276045.1	ORAI1	chr12:121626549-121642677	Prone	Prot	OK	15.7802	25.6547	0.701112	2.92755	5e-05	0.00034525	yes
ENSG00000253159.2	ENSG00000253159.2	PCDHGA12	chr5:141330570-141512981	Prone	Prot	OK	1.79262	2.91166	0.699771	0.974334	0.0013	0.00680148	yes
ENSG00000196502.10	ENSG00000196502.10	SULT1A1	chr16:28605195-28623625	Prone	Prot	OK	1.50729	2.44668	0.698872	1.10383	5e-05	0.00034525	yes
ENSG00000118900.13	ENSG00000118900.13	UBN1	chr16:4803202-4882360	Prone	Prot	OK	14.6801	23.829	0.698854	1.89973	5e-05	0.00034525	yes
ENSG00000117791.14	ENSG00000117791.14	2016-03-02	chr1:220748224-220784815	Prone	Prot	OK	3.96063	6.4256	0.698102	1.22322	5e-05	0.00034525	yes
ENSG00000156298.11	ENSG00000156298.11	TSPAN7	chrX:37349274-38688920	Prone	Prot	OK	21.7252	35.2416	0.697908	1.28085	5e-05	0.00034525	yes
ENSG00000120256.8	ENSG00000120256.8	LRP11	chr6:149724314-149923121	Prone	Prot	OK	11.0955	17.9937	0.697508	1.38896	5e-05	0.00034525	yes
ENSG00000271894.1	ENSG00000271894.1	RP11-482H16.1	chr2:55952157-56386173	Prone	Prot	OK	1.34952	2.18682	0.696386	0.89402	0.00255	0.0123387	yes
ENSG00000178538.8	ENSG00000178538.8	CA8	chr8:60187346-60281412	Prone	Prot	OK	2.77717	4.49873	0.695902	1.38733	5e-05	0.00034525	yes
ENSG00000171723.14	ENSG00000171723.14	GPHN	chr14:66212809-67181803	Prone	Prot	OK	2.85798	4.62609	0.694801	0.924387	5e-05	0.00034525	yes
ENSG00000126391.12	ENSG00000126391.12	FRMD8	chr11:65386598-65413525	Prone	Prot	OK	23.0811	37.2999	0.692459	2.78696	5e-05	0.00034525	yes
ENSG00000107281.8	ENSG00000107281.8	NPDC1	chr9:137007226-137046203	Prone	Prot	OK	57.8564	93.4791	0.692167	2.84031	5e-05	0.00034525	yes
ENSG00000213699.7	ENSG00000213699.7	SLC35F6	chr2:26764283-26801067	Prone	Prot	OK	9.52229	15.3763	0.691329	2.85175	5e-05	0.00034525	yes
ENSG00000049192.13	ENSG00000049192.13	ADAMTS6	chr5:65148735-65481920	Prone	Prot	OK	5.94109	9.58879	0.690622	1.76023	5e-05	0.00034525	yes
ENSG00000124440.14	ENSG00000124440.14	HIF3A	chr19:46297045-46343433	Prone	Prot	OK	3.72418	6.00747	0.689835	0.927429	0.0001	0.000658879	yes
ENSG00000140105.16	ENSG00000140105.16	WARS	chr14:100333787-100530303	Prone	Prot	OK	34.5595	55.7406	0.689645	2.42719	5e-05	0.00034525	yes
ENSG00000182511.10	ENSG00000182511.10	FES	chr15:90883694-90895776	Prone	Prot	OK	19.5567	31.5354	0.689311	2.06514	5e-05	0.00034525	yes
ENSG00000130203.8	ENSG00000130203.8	APOE	chr19:44905753-44919349	Prone	Prot	OK	1.1869	1.91372	0.68918	0.808698	0.00185	0.00926643	yes
ENSG00000091428.16	ENSG00000091428.16	RAPGEF4	chr2:172677140-173052893	Prone	Prot	OK	5.36967	8.65405	0.688543	1.6172	5e-05	0.00034525	yes
ENSG00000088038.16	ENSG00000088038.16	CNOT3	chr19:54137727-54159882	Prone	Prot	OK	1.82878	2.94058	0.685216	1.40561	5e-05	0.00034525	yes
ENSG00000124201.13	ENSG00000124201.13	ZNFX1	chr20:49219294-49295738	Prone	Prot	OK	11.5953	18.6364	0.684579	3.01103	5e-05	0.00034525	yes
ENSG00000278463.1	ENSG00000278463.1	HIST1H2AB	chr6:26033175-26033568	Prone	Prot	OK	27.7769	44.6431	0.684551	2.03307	5e-05	0.00034525	yes
ENSG00000170921.13	ENSG00000170921.13	TANC2	chr17:63009555-63432211	Prone	Prot	OK	7.35868	11.8249	0.684313	0.847545	0.00365	0.0166986	yes
ENSG00000090339.7	ENSG00000090339.7	ICAM1	chr19:10251900-10289019	Prone	Prot	OK	12.4931	20.0745	0.684235	1.75192	5e-05	0.00034525	yes
ENSG00000117602.10	ENSG00000117602.10	RCAN3	chr1:24502350-24556024	Prone	Prot	OK	0.597621	0.960171	0.68406	0.516415	0.00165	0.00837775	yes
ENSG00000173848.17	ENSG00000173848.17	NET1	chr10:5412550-5458463	Prone	Prot	OK	7.06739	11.3437	0.682644	2.15136	5e-05	0.00034525	yes
ENSG00000135363.10	ENSG00000135363.10	LMO2	chr11:33858575-33892289	Prone	Prot	OK	62.6099	100.484	0.682507	4.06175	5e-05	0.00034525	yes
ENSG00000089060.10	ENSG00000089060.10	SLC8B1	chr12:113298758-113391625	Prone	Prot	OK	10.8002	17.3311	0.682302	2.35684	5e-05	0.00034525	yes
ENSG00000071073.11	ENSG00000071073.11	MGAT4A	chr2:98619105-98731126	Prone	Prot	OK	35.416	56.8277	0.682191	2.19309	5e-05	0.00034525	yes
ENSG00000225938.1	ENSG00000225938.1	RP4-575N6.4	chr1:101235682-101236528	Prone	Prot	OK	3.71241	5.94801	0.680051	0.921498	0.0023	0.0112526	yes
ENSG00000235387.1	ENSG00000235387.1	LINC00961	chr9:35909482-35911686	Prone	Prot	OK	1.76184	2.82154	0.679399	1.60637	5e-05	0.00034525	yes
ENSG00000197142.9	ENSG00000197142.9	ACSL5	chr10:112374017-112446917	Prone	Prot	OK	7.30671	11.6964	0.678774	1.67847	5e-05	0.00034525	yes
ENSG00000111602.10	ENSG00000111602.10	TIMELESS	chr12:56416372-56449403	Prone	Prot	OK	2.7677	4.42852	0.67814	2.091	5e-05	0.00034525	yes
ENSG00000132376.18	ENSG00000132376.18	INPP5K	chr17:1494570-1516888	Prone	Prot	OK	16.111	25.7773	0.678057	2.16592	5e-05	0.00034525	yes
ENSG00000128052.8	ENSG00000128052.8	KDR	chr4:55053059-55125589	Prone	Prot	OK	76.4689	122.323	0.677752	3.35903	5e-05	0.00034525	yes
ENSG00000271780.1	ENSG00000271780.1	RP11-1017G21.5	chr14:101948346-101949425	Prone	Prot	OK	0.936002	1.49698	0.677475	0.97341	0.00065	0.00366161	yes
ENSG00000110400.9	ENSG00000110400.9	PVRL1	chr11:119608422-119729084	Prone	Prot	OK	1.48426	2.37367	0.677375	0.998569	0.0001	0.000658879	yes
ENSG00000080947.13	ENSG00000080947.13	CROCCP3	chr1:16460947-16499257	Prone	Prot	OK	2.1848	3.48945	0.675502	0.824739	0.00465	0.0206634	yes
ENSG00000159388.5	ENSG00000159388.5	BTG2	chr1:203305490-203309602	Prone	Prot	OK	31.7788	50.7403	0.675067	3.83109	5e-05	0.00034525	yes
ENSG00000164736.5	ENSG00000164736.5	SOX17	chr8:54457934-54460888	Prone	Prot	OK	22.9689	36.6539	0.674284	3.58701	5e-05	0.00034525	yes
ENSG00000254087.6	ENSG00000254087.6	LYN	chr8:55879812-56014168	Prone	Prot	OK	8.89065	14.175	0.672985	3.07017	5e-05	0.00034525	yes
ENSG00000117461.13	ENSG00000117461.13	PIK3R3	chr1:46040139-46185958	Prone	Prot	OK	3.87525	6.17296	0.671675	1.92884	5e-05	0.00034525	yes
ENSG00000177169.8	ENSG00000177169.8	ULK1	chr12:131894650-131923167	Prone	Prot	OK	5.85219	9.32115	0.671531	1.81834	5e-05	0.00034525	yes
ENSG00000064989.11	ENSG00000064989.11	CALCRL	chr2:187001875-187565760	Prone	Prot	OK	239.635	381.371	0.670356	1.60675	5e-05	0.00034525	yes
ENSG00000161558.9	ENSG00000161558.9	TMEM143	chr19:48332355-48364237	Prone	Prot	OK	1.22364	1.94674	0.669884	0.531108	0.0012	0.00634897	yes
ENSG00000273703.1	ENSG00000273703.1	HIST1H2BM	chr6:27815043-27815424	Prone	Prot	OK	9.91162	15.7583	0.668917	1.48626	5e-05	0.00034525	yes
ENSG00000164107.8	ENSG00000164107.8	HAND2	chr4:173524968-173591324	Prone	Prot	OK	0.865892	1.37608	0.668304	0.779078	0.0031	0.0145458	yes
ENSG00000158470.5	ENSG00000158470.5	B4GALT5	chr20:49632944-49713878	Prone	Prot	OK	33.2707	52.8331	0.667189	4.23999	5e-05	0.00034525	yes
ENSG00000100439.9	ENSG00000100439.9	ABHD4	chr14:22595807-22613215	Prone	Prot	OK	3.60735	5.72332	0.665913	1.24524	5e-05	0.00034525	yes
ENSG00000078269.12	ENSG00000078269.12	SYNJ2	chr6:157981886-158099176	Prone	Prot	OK	24.984	39.6322	0.66567	2.35695	5e-05	0.00034525	yes
ENSG00000148773.11	ENSG00000148773.11	MKI67	chr10:128096658-128126385	Prone	Prot	OK	1.88139	2.98335	0.66513	0.946938	0.0007	0.00392758	yes
ENSG00000253552.6	ENSG00000253552.6	HOXA-AS2	chr7:27106183-27157936	Prone	Prot	OK	2.79718	4.43162	0.663862	0.800325	0.00135	0.00701105	yes
ENSG00000122644.11	ENSG00000122644.11	ARL4A	chr7:12686855-12690934	Prone	Prot	OK	28.3413	44.85	0.662202	3.1191	5e-05	0.00034525	yes
ENSG00000110047.16	ENSG00000110047.16	EHD1	chr11:64851641-64888296	Prone	Prot	OK	25.6862	40.624	0.661337	2.66703	5e-05	0.00034525	yes
ENSG00000122515.13	ENSG00000122515.13	ZMIZ2	chr7:44748580-44769881	Prone	Prot	OK	7.16923	11.3363	0.661064	1.67429	5e-05	0.00034525	yes
ENSG00000171310.9	ENSG00000171310.9	CHST11	chr12:104455294-104762014	Prone	Prot	OK	4.49601	7.10717	0.660631	1.2799	5e-05	0.00034525	yes
ENSG00000168961.15	ENSG00000168961.15	LGALS9	chr17:27456713-27649560	Prone	Prot	OK	14.9751	23.6635	0.660103	1.20386	0.0001	0.000658879	yes
ENSG00000166562.7	ENSG00000166562.7	SEC11C	chr18:59139476-59158836	Prone	Prot	OK	10.4061	16.4311	0.658992	1.74589	5e-05	0.00034525	yes
ENSG00000001461.15	ENSG00000001461.15	NIPAL3	chr1:24307555-24472976	Prone	Prot	OK	6.75992	10.6572	0.65675	2.40013	5e-05	0.00034525	yes
ENSG00000091137.10	ENSG00000091137.10	SLC26A4	chr7:107653967-107717809	Prone	Prot	OK	1.96535	3.09522	0.655256	0.739158	0.0048	0.0211831	yes
ENSG00000111885.6	ENSG00000111885.6	MAN1A1	chr6:119177208-119349761	Prone	Prot	OK	14.9184	23.4865	0.654734	3.9291	5e-05	0.00034525	yes
ENSG00000171130.16	ENSG00000171130.16	ATP6V0E2	chr7:149867696-149880698	Prone	Prot	OK	9.86687	15.527	0.654115	1.61137	5e-05	0.00034525	yes
ENSG00000204138.11	ENSG00000204138.11	PHACTR4	chr1:28369602-28500369	Prone	Prot	OK	2.59131	4.07625	0.653561	2.17854	5e-05	0.00034525	yes
ENSG00000185614.4	ENSG00000185614.4	FAM212A	chr3:49803253-49805030	Prone	Prot	OK	18.6246	29.2763	0.652527	2.88087	5e-05	0.00034525	yes
ENSG00000100629.15	ENSG00000100629.15	CEP128	chr14:80476982-81170414	Prone	Prot	OK	0.963883	1.51473	0.65213	0.496527	0.00225	0.0110386	yes
ENSG00000135899.15	ENSG00000135899.15	SP110	chr2:230121369-230313215	Prone	Prot	OK	2.58385	4.05745	0.651054	1.18368	5e-05	0.00034525	yes
ENSG00000254122.2	ENSG00000254122.2	PCDHGB7	chr5:141330570-141512981	Prone	Prot	OK	3.00797	4.71836	0.649498	1.28554	5e-05	0.00034525	yes
ENSG00000131711.13	ENSG00000131711.13	MAP1B	chr5:72107233-72209570	Prone	Prot	OK	10.5521	16.552	0.649476	1.51882	5e-05	0.00034525	yes
ENSG00000224505.2	ENSG00000224505.2	AC002117.1	chr17:45148501-45171584	Prone	Prot	OK	3.57744	5.60714	0.648338	0.808331	0.0052	0.0226716	yes
ENSG00000198208.10	ENSG00000198208.10	RPS6KL1	chr14:74903953-74923396	Prone	Prot	OK	6.99213	10.956	0.647918	1.3778	5e-05	0.00034525	yes
ENSG00000178445.8	ENSG00000178445.8	GLDC	chr9:6532463-6645650	Prone	Prot	OK	0.885763	1.38561	0.645531	0.681159	0.0006	0.00340169	yes
ENSG00000136720.6	ENSG00000136720.6	HS6ST1	chr2:128236715-128318577	Prone	Prot	OK	7.59855	11.8852	0.645369	2.78251	5e-05	0.00034525	yes
ENSG00000225968.6	ENSG00000225968.6	ELFN1	chr7:1688118-1747954	Prone	Prot	OK	0.646748	1.01102	0.644536	1.16744	5e-05	0.00034525	yes
ENSG00000160888.6	ENSG00000160888.6	IER2	chr19:13150414-13154908	Prone	Prot	OK	10.0175	15.655	0.644094	2.20174	5e-05	0.00034525	yes
ENSG00000162430.15	ENSG00000162430.15	SEPN1	chr1:25800175-25859458	Prone	Prot	OK	28.4892	44.5201	0.644043	3.56605	5e-05	0.00034525	yes
ENSG00000121858.9	ENSG00000121858.9	TNFSF10	chr3:172505507-172523507	Prone	Prot	OK	23.4496	36.6422	0.64394	3.40296	5e-05	0.00034525	yes
ENSG00000176401.5	ENSG00000176401.5	EID2B	chr19:39530989-39534422	Prone	Prot	OK	0.864729	1.35023	0.642884	0.70494	0.00475	0.0210217	yes
ENSG00000158683.6	ENSG00000158683.6	PKD1L1	chr7:47695729-47979581	Prone	Prot	OK	3.91821	6.11742	0.642729	1.57594	5e-05	0.00034525	yes
ENSG00000268858.2	ENSG00000268858.2	RP4-591C20.9	chr20:63861211-63864293	Prone	Prot	OK	0.888872	1.38599	0.64087	1.19927	5e-05	0.00034525	yes
ENSG00000139211.6	ENSG00000139211.6	AMIGO2	chr12:47075706-47236662	Prone	Prot	OK	6.30091	9.82451	0.640826	2.92231	5e-05	0.00034525	yes
ENSG00000142197.11	ENSG00000142197.11	DOPEY2	chr21:36131766-36294274	Prone	Prot	OK	2.20939	3.44071	0.639058	0.890993	0.0015	0.00771616	yes
ENSG00000153048.9	ENSG00000153048.9	CARHSP1	chr16:8674564-8869012	Prone	Prot	OK	35.7793	55.6588	0.637484	1.91519	5e-05	0.00034525	yes
ENSG00000130748.6	ENSG00000130748.6	TMEM160	chr19:47045906-47048630	Prone	Prot	OK	6.53197	10.1549	0.636583	1.24704	0.0001	0.000658879	yes
ENSG00000274877.1	ENSG00000274877.1	RP11-65I12.1	chr2:113211521-113278950	Prone	Prot	OK	1.69131	2.62908	0.636422	1.02957	0.0002	0.00125222	yes
ENSG00000020181.16	ENSG00000020181.16	GPR124	chr8:37784190-37849904	Prone	Prot	OK	8.44508	13.1255	0.636184	1.66485	5e-05	0.00034525	yes
ENSG00000279289.1	ENSG00000279289.1	RP3-331H24.6	chr6:71221456-71420769	Prone	Prot	OK	0.850487	1.32183	0.63618	0.81023	0.0062	0.0262759	yes
ENSG00000261641.2	ENSG00000261641.2	LA16c-390E6.5	chr16:1444933-1475580	Prone	Prot	OK	18.7678	29.1656	0.636013	1.46203	5e-05	0.00034525	yes
ENSG00000133424.19	ENSG00000133424.19	LARGE	chr22:33162225-33922841	Prone	Prot	OK	2.2174	3.44266	0.634655	0.707235	0.0016	0.00817095	yes
ENSG00000186283.12	ENSG00000186283.12	TOR3A	chr1:179081376-179098023	Prone	Prot	OK	5.45779	8.47143	0.634289	1.74397	5e-05	0.00034525	yes
ENSG00000142634.11	ENSG00000142634.11	EFHD2	chr1:15409894-15430343	Prone	Prot	OK	13.1523	20.4104	0.633991	3.14775	5e-05	0.00034525	yes
ENSG00000101846.6	ENSG00000101846.6	STS	chrX:7219455-7354810	Prone	Prot	OK	1.35604	2.10409	0.633803	2.43943	5e-05	0.00034525	yes
ENSG00000205336.10	ENSG00000205336.10	GPR56	chr16:57610651-57665580	Prone	Prot	OK	22.0319	34.1665	0.632985	1.91477	5e-05	0.00034525	yes
ENSG00000128245.13	ENSG00000128245.13	YWHAH	chr22:31933520-31957603	Prone	Prot	OK	30.2508	46.8982	0.632563	3.63205	5e-05	0.00034525	yes
ENSG00000224383.6	ENSG00000224383.6	PRR29	chr17:63996070-64020634	Prone	Prot	OK	13.1393	20.3692	0.6325	0.966574	0.0004	0.00235	yes
ENSG00000126709.13	ENSG00000126709.13	IFI6	chr1:27666060-27703063	Prone	Prot	OK	15.8682	24.5824	0.631484	2.08734	5e-05	0.00034525	yes
ENSG00000176463.12	ENSG00000176463.12	SLCO3A1	chr15:91853694-92331037	Prone	Prot	OK	2.13275	3.30253	0.630856	0.825467	0.00015	0.000961801	yes
ENSG00000271020.1	ENSG00000271020.1	RP11-10C24.1	chr3:33797148-33797681	Prone	Prot	OK	1.22353	1.89386	0.630282	0.780333	0.00735	0.0302496	yes
ENSG00000135709.11	ENSG00000135709.11	KIAA0513	chr16:85027750-85094230	Prone	Prot	OK	1.47595	2.28405	0.629949	1.08147	5e-05	0.00034525	yes
ENSG00000104738.15	ENSG00000104738.15	MCM4	chr8:47960184-47978160	Prone	Prot	OK	5.46767	8.46077	0.629862	0.968559	0.0001	0.000658879	yes
ENSG00000011405.12	ENSG00000011405.12	PIK3C2A	chr11:17074388-17207983	Prone	Prot	OK	23.9253	37.0157	0.629601	1.39901	5e-05	0.00034525	yes
ENSG00000122862.4	ENSG00000122862.4	SRGN	chr10:69088105-69104811	Prone	Prot	OK	183.457	283.81	0.629486	4.02319	5e-05	0.00034525	yes
ENSG00000122694.14	ENSG00000122694.14	GLIPR2	chr9:36136535-36163913	Prone	Prot	OK	2.9636	4.58433	0.62936	1.78105	5e-05	0.00034525	yes
ENSG00000116962.13	ENSG00000116962.13	NID1	chr1:235975829-236065162	Prone	Prot	OK	37.3685	57.7374	0.627683	4.00832	5e-05	0.00034525	yes
ENSG00000008130.14	ENSG00000008130.14	NADK	chr1:1751231-1780457	Prone	Prot	OK	24.2629	37.4836	0.627509	2.33101	5e-05	0.00034525	yes
ENSG00000174004.5	ENSG00000174004.5	NRROS	chr3:196639685-196736007	Prone	Prot	OK	6.45189	9.96666	0.627388	1.86172	5e-05	0.00034525	yes
ENSG00000109193.9	ENSG00000109193.9	SULT1E1	chr4:69791871-69860152	Prone	Prot	OK	0.607242	0.937953	0.627245	0.785572	0.0028	0.0133514	yes
ENSG00000162909.16	ENSG00000162909.16	CAPN2	chr1:223701592-223776018	Prone	Prot	OK	135.632	209.466	0.627018	3.19433	5e-05	0.00034525	yes
ENSG00000145632.13	ENSG00000145632.13	PLK2	chr5:58453981-58460260	Prone	Prot	OK	162.45	250.752	0.626266	2.04151	5e-05	0.00034525	yes
ENSG00000152763.15	ENSG00000152763.15	WDR78	chr1:66812884-66924887	Prone	Prot	OK	1.20588	1.86059	0.625672	0.535383	0.0035	0.0161117	yes
ENSG00000163399.14	ENSG00000163399.14	ATP1A1	chr1:116372667-116418622	Prone	Prot	OK	78.3487	120.68	0.623204	3.41463	5e-05	0.00034525	yes
ENSG00000114541.13	ENSG00000114541.13	FRMD4B	chr3:69169989-69542583	Prone	Prot	OK	57.0076	87.7273	0.621873	1.94792	5e-05	0.00034525	yes
ENSG00000174327.6	ENSG00000174327.6	SLC16A13	chr17:7036074-7040121	Prone	Prot	OK	2.30603	3.53982	0.618262	1.22366	0.0001	0.000658879	yes
ENSG00000026036.19	ENSG00000026036.19	RTEL1-TNFRSF6B	chr20:63657809-63743505	Prone	Prot	OK	1.80553	2.77045	0.617696	0.930744	0.0013	0.00680148	yes
ENSG00000120693.12	ENSG00000120693.12	SMAD9	chr13:36844830-36920765	Prone	Prot	OK	1.70706	2.61898	0.617488	1.50209	5e-05	0.00034525	yes
ENSG00000168785.6	ENSG00000168785.6	TSPAN5	chr4:98470366-98658629	Prone	Prot	OK	13.7252	21.0553	0.617353	2.51205	5e-05	0.00034525	yes
ENSG00000279561.1	ENSG00000279561.1	AL845472.1	chr9:41269915-41273997	Prone	Prot	OK	0.89496	1.37278	0.617209	1.36974	5e-05	0.00034525	yes
ENSG00000188559.12	ENSG00000188559.12	RALGAPA2	chr20:20389551-20712488	Prone	Prot	OK	16.1443	24.7633	0.617183	1.98765	5e-05	0.00034525	yes
ENSG00000003400.13	ENSG00000003400.13	CASP10	chr2:201182880-201229406	Prone	Prot	OK	11.9433	18.3058	0.616097	2.36167	5e-05	0.00034525	yes
ENSG00000159658.9	ENSG00000159658.9	EFCAB14	chr1:46674035-46719064	Prone	Prot	OK	22.1301	33.866	0.613825	2.25061	5e-05	0.00034525	yes
ENSG00000147044.19	ENSG00000147044.19	CASK	chrX:41514933-41923463	Prone	Prot	OK	6.21562	9.51109	0.613714	1.31395	5e-05	0.00034525	yes
ENSG00000197818.10	ENSG00000197818.10	SLC9A8	chr20:49812712-49892242	Prone	Prot	OK	2.9675	4.54004	0.613456	1.23393	5e-05	0.00034525	yes
ENSG00000162066.13	ENSG00000162066.13	AMDHD2	chr16:2475117-2531422	Prone	Prot	OK	24.8689	38.0407	0.613204	1.54688	5e-05	0.00034525	yes
ENSG00000134824.12	ENSG00000134824.12	FADS2	chr11:61680432-61867354	Prone	Prot	OK	53.6758	82.083	0.612812	2.1269	5e-05	0.00034525	yes
ENSG00000172936.11	ENSG00000172936.11	MYD88	chr3:38138477-38143022	Prone	Prot	OK	2.33423	3.56909	0.612608	1.37825	5e-05	0.00034525	yes
ENSG00000068079.6	ENSG00000068079.6	IFI35	chr17:43006724-43014456	Prone	Prot	OK	5.72254	8.73676	0.610442	1.38082	5e-05	0.00034525	yes
ENSG00000184640.16	ENSG00000184640.16	2016-09-09	chr17:77257736-77500596	Prone	Prot	OK	38.1366	58.2234	0.610422	2.23875	5e-05	0.00034525	yes
ENSG00000114812.11	ENSG00000114812.11	VIPR1	chr3:42489298-42537573	Prone	Prot	OK	2.38594	3.64223	0.610265	0.968726	5e-05	0.00034525	yes
ENSG00000183018.7	ENSG00000183018.7	SPNS2	chr17:4497393-4555631	Prone	Prot	OK	20.0485	30.603	0.610178	2.2741	5e-05	0.00034525	yes
ENSG00000167173.17	ENSG00000167173.17	C15orf39	chr15:75195642-75212169	Prone	Prot	OK	2.75012	4.19602	0.609524	1.15808	0.00015	0.000961801	yes
ENSG00000141349.7	ENSG00000141349.7	G6PC3	chr17:44070734-44076344	Prone	Prot	OK	11.9516	18.2289	0.60902	2.05581	5e-05	0.00034525	yes
ENSG00000164828.16	ENSG00000164828.16	SUN1	chr7:816614-896436	Prone	Prot	OK	61.6465	94.0146	0.608866	2.07674	5e-05	0.00034525	yes
ENSG00000280852.1	ENSG00000280852.1	AC025048.1	chr17:60102182-60102662	Prone	Prot	OK	2.09374	3.19127	0.608051	0.831539	0.005	0.0219353	yes
ENSG00000261971.5	ENSG00000261971.5	MMP25-AS1	chr16:3046680-3060726	Prone	Prot	OK	1.96883	2.99927	0.607271	0.638638	0.0068	0.0283921	yes
ENSG00000058668.13	ENSG00000058668.13	ATP2B4	chr1:203626560-203744081	Prone	Prot	OK	16.2589	24.7544	0.606458	2.542	5e-05	0.00034525	yes
ENSG00000066322.11	ENSG00000066322.11	ELOVL1	chr1:43363396-43368074	Prone	Prot	OK	53.8533	81.9617	0.605915	3.25403	5e-05	0.00034525	yes
ENSG00000105193.7	ENSG00000105193.7	RPS16	chr19:39433206-39435948	Prone	Prot	OK	116.991	177.937	0.604976	3.11471	5e-05	0.00034525	yes
ENSG00000184260.5	ENSG00000184260.5	HIST2H2AC	chr1:149886974-149887364	Prone	Prot	OK	29.5306	44.8888	0.604143	1.80821	5e-05	0.00034525	yes
ENSG00000184792.14	ENSG00000184792.14	OSBP2	chr22:30693781-30907824	Prone	Prot	OK	4.8311	7.33713	0.602864	1.85126	5e-05	0.00034525	yes
ENSG00000260111.1	ENSG00000260111.1	RP11-529K1.4	chr16:70375977-70439237	Prone	Prot	OK	9.8876	15.0026	0.601518	0.733054	0.01275	0.0482488	yes
ENSG00000116815.14	ENSG00000116815.14	CD58	chr1:116514534-116571039	Prone	Prot	OK	8.06049	12.2257	0.600982	2.10054	5e-05	0.00034525	yes
ENSG00000198844.9	ENSG00000198844.9	ARHGEF15	chr17:8310240-8322516	Prone	Prot	OK	15.5618	23.6013	0.600862	1.42297	5e-05	0.00034525	yes
ENSG00000135451.11	ENSG00000135451.11	TROAP	chr12:49292630-49331731	Prone	Prot	OK	4.6194	7.00099	0.599853	1.12778	5e-05	0.00034525	yes
ENSG00000100558.7	ENSG00000100558.7	PLEK2	chr14:67386982-67412200	Prone	Prot	OK	1.70399	2.58236	0.59978	0.895821	5e-05	0.00034525	yes
ENSG00000184916.7	ENSG00000184916.7	JAG2	chr14:105140980-105181323	Prone	Prot	OK	14.822	22.4587	0.599536	1.50498	5e-05	0.00034525	yes
ENSG00000205683.10	ENSG00000205683.10	DPF3	chr14:72619295-72894116	Prone	Prot	OK	1.28904	1.95245	0.598982	0.568572	0.00275	0.0131664	yes
ENSG00000155849.14	ENSG00000155849.14	ELMO1	chr7:36854360-37449249	Prone	Prot	OK	11.3483	17.1833	0.598531	1.42874	5e-05	0.00034525	yes
ENSG00000197077.11	ENSG00000197077.11	KIAA1671	chr22:24952729-25197448	Prone	Prot	OK	16.7637	25.3813	0.598425	3.45737	5e-05	0.00034525	yes
ENSG00000198837.8	ENSG00000198837.8	DENND4B	chr1:153929500-153946696	Prone	Prot	OK	11.5851	17.5335	0.597843	1.33267	5e-05	0.00034525	yes
ENSG00000220785.6	ENSG00000220785.6	MTMR9LP	chr1:32231657-32241620	Prone	Prot	OK	26.4228	39.9832	0.597608	3.14427	5e-05	0.00034525	yes
ENSG00000067836.11	ENSG00000067836.11	ROGDI	chr16:4796967-4802950	Prone	Prot	OK	3.09336	4.6795	0.597178	0.96887	5e-05	0.00034525	yes
ENSG00000272695.1	ENSG00000272695.1	GAS6-AS2	chr13:113864167-113866833	Prone	Prot	OK	0.983526	1.48755	0.596905	1.17758	0.0001	0.000658879	yes
ENSG00000188211.7	ENSG00000188211.7	NCR3LG1	chr11:17351725-17377341	Prone	Prot	OK	1.3922	2.10504	0.59648	2.26693	5e-05	0.00034525	yes
ENSG00000274267.1	ENSG00000274267.1	HIST1H3B	chr6:26031649-26032060	Prone	Prot	OK	75.6315	114.301	0.595775	2.49473	5e-05	0.00034525	yes
ENSG00000153714.5	ENSG00000153714.5	LURAP1L	chr9:12685438-12822131	Prone	Prot	OK	1.41371	2.13597	0.595407	1.10703	5e-05	0.00034525	yes
ENSG00000174791.9	ENSG00000174791.9	RIN1	chr11:66330241-66345125	Prone	Prot	OK	4.37089	6.60374	0.595356	1.0633	0.00015	0.000961801	yes
ENSG00000169607.11	ENSG00000169607.11	CKAP2L	chr2:112721485-112764677	Prone	Prot	OK	0.954499	1.44102	0.594275	0.703313	0.00245	0.0119121	yes
ENSG00000117226.10	ENSG00000117226.10	GBP3	chr1:89006665-89022894	Prone	Prot	OK	8.27531	12.471	0.591687	2.14703	5e-05	0.00034525	yes
ENSG00000072210.17	ENSG00000072210.17	ALDH3A2	chr17:19648135-19677598	Prone	Prot	OK	16.7405	25.2135	0.590852	1.97287	5e-05	0.00034525	yes
ENSG00000097046.11	ENSG00000097046.11	CDC7	chr1:91500892-91525764	Prone	Prot	OK	1.17843	1.77458	0.590614	0.880152	0.00045	0.00262082	yes
ENSG00000170776.18	ENSG00000170776.18	AKAP13	chr15:85380570-85750281	Prone	Prot	OK	23.3639	35.1777	0.590376	1.39129	5e-05	0.00034525	yes
ENSG00000127481.13	ENSG00000127481.13	UBR4	chr1:19072109-19210276	Prone	Prot	OK	17.6995	26.646	0.590209	1.13857	0.0001	0.000658879	yes
ENSG00000198959.10	ENSG00000198959.10	TGM2	chr20:38033545-38166578	Prone	Prot	OK	180.521	271.766	0.590198	2.92814	5e-05	0.00034525	yes
ENSG00000089327.13	ENSG00000089327.13	FXYD5	chr19:35154729-35169883	Prone	Prot	OK	29.0733	43.7476	0.589512	2.96026	5e-05	0.00034525	yes
ENSG00000157350.11	ENSG00000157350.11	ST3GAL2	chr16:70375977-70439237	Prone	Prot	OK	16.7485	25.2004	0.589417	2.08248	5e-05	0.00034525	yes
ENSG00000160285.13	ENSG00000160285.13	LSS	chr21:46185078-46228824	Prone	Prot	OK	17.6964	26.6172	0.588902	2.066	5e-05	0.00034525	yes
ENSG00000057252.11	ENSG00000057252.11	SOAT1	chr1:179293713-179358680	Prone	Prot	OK	8.27015	12.4352	0.588438	1.94283	5e-05	0.00034525	yes
ENSG00000103197.15	ENSG00000103197.15	TSC2	chr16:2039814-2135898	Prone	Prot	OK	29.011	43.605	0.587893	1.54543	5e-05	0.00034525	yes
ENSG00000155016.16	ENSG00000155016.16	CYP2U1	chr4:107824562-107978799	Prone	Prot	OK	4.76819	7.16122	0.586762	1.90765	5e-05	0.00034525	yes
ENSG00000279576.1	ENSG00000279576.1	MALAT1	chr11:65497761-65506516	Prone	Prot	OK	448.638	673.742	0.586643	1.01677	0.0009	0.0049186	yes
ENSG00000204428.11	ENSG00000204428.11	LY6G5C	chr6:31676683-31684040	Prone	Prot	OK	1.48553	2.23056	0.586432	0.710254	0.00245	0.0119121	yes
ENSG00000167962.11	ENSG00000167962.11	ZNF598	chr16:1997653-2009823	Prone	Prot	OK	12.3351	18.5199	0.586302	1.98607	5e-05	0.00034525	yes
ENSG00000214870.7	ENSG00000214870.7	AC004540.5	chr7:26398592-26494256	Prone	Prot	OK	2.06219	3.09382	0.58521	0.743988	0.0029	0.0137584	yes
ENSG00000175643.8	ENSG00000175643.8	RMI2	chr16:11249618-11351762	Prone	Prot	OK	1.76753	2.65173	0.5852	1.01601	0.00025	0.00153863	yes
ENSG00000159231.5	ENSG00000159231.5	CBR3	chr21:36131766-36294274	Prone	Prot	OK	2.95524	4.43174	0.584596	0.968243	0.0011	0.00587723	yes
ENSG00000101412.12	ENSG00000101412.12	E2F1	chr20:33675682-33686404	Prone	Prot	OK	1.38494	2.07646	0.584296	1.36025	5e-05	0.00034525	yes
ENSG00000182541.16	ENSG00000182541.16	LIMK2	chr22:31212238-31280080	Prone	Prot	OK	22.138	33.1826	0.583905	2.3078	5e-05	0.00034525	yes
ENSG00000197442.9	ENSG00000197442.9	MAP3K5	chr6:136557046-136792518	Prone	Prot	OK	4.08756	6.12501	0.583471	2.29626	5e-05	0.00034525	yes
ENSG00000241839.8	ENSG00000241839.8	PLEKHO2	chr15:64841882-64958700	Prone	Prot	OK	11.745	17.5908	0.582773	3.15692	5e-05	0.00034525	yes
ENSG00000227195.7	ENSG00000227195.7	MIR663AHG	chr20:26186919-26251526	Prone	Prot	OK	2.78486	4.16725	0.581492	0.737534	5e-05	0.00034525	yes
ENSG00000115657.11	ENSG00000115657.11	ABCB6	chr2:219209767-219229717	Prone	Prot	OK	11.0802	16.5737	0.580917	1.35002	5e-05	0.00034525	yes
ENSG00000159335.14	ENSG00000159335.14	PTMS	chr12:6747995-6770952	Prone	Prot	OK	50.7493	75.8855	0.580435	2.61034	5e-05	0.00034525	yes
ENSG00000204131.7	ENSG00000204131.7	NHSL2	chrX:72132149-72141362	Prone	Prot	OK	2.78412	4.16241	0.580198	2.2933	5e-05	0.00034525	yes
ENSG00000102996.4	ENSG00000102996.4	MMP15	chr16:58025565-58046901	Prone	Prot	OK	5.14376	7.6858	0.579373	2.15832	5e-05	0.00034525	yes
ENSG00000110888.16	ENSG00000110888.16	CAPRIN2	chr12:30709551-30754951	Prone	Prot	OK	7.8363	11.7022	0.578531	1.42708	5e-05	0.00034525	yes
ENSG00000140319.9	ENSG00000140319.9	SRP14	chr15:40035738-40039188	Prone	Prot	OK	84.3741	125.987	0.578407	3.44438	5e-05	0.00034525	yes
ENSG00000240583.9	ENSG00000240583.9	AQP1	chr7:30651942-30925516	Prone	Prot	OK	63.7242	95.1341	0.578122	2.74978	5e-05	0.00034525	yes
ENSG00000167996.14	ENSG00000167996.14	FTH1	chr11:61949820-61967660	Prone	Prot	OK	959.448	1432.12	0.577873	3.06864	5e-05	0.00034525	yes
ENSG00000186834.3	ENSG00000186834.3	HEXIM1	chr17:45148501-45171584	Prone	Prot	OK	4.32534	6.45277	0.577104	2.1868	5e-05	0.00034525	yes
ENSG00000280018.2	ENSG00000280018.2	CH507-154B10.2	chr21:6986449-6997765	Prone	Prot	OK	2.46903	3.68231	0.576664	1.0321	0.00025	0.00153863	yes
ENSG00000163840.8	ENSG00000163840.8	DTX3L	chr3:122527923-122575203	Prone	Prot	OK	6.76492	10.0875	0.576426	2.62483	5e-05	0.00034525	yes
ENSG00000215769.7	ENSG00000215769.7	RP13-104F24.2	chr17:64749662-64837154	Prone	Prot	OK	9.61059	14.3302	0.576364	1.50999	5e-05	0.00034525	yes
ENSG00000158856.16	ENSG00000158856.16	DMTN	chr8:22048994-22082527	Prone	Prot	OK	3.15888	4.70939	0.576126	0.89997	5e-05	0.00034525	yes
ENSG00000173221.12	ENSG00000173221.12	GLRX	chr5:95701248-95824383	Prone	Prot	OK	9.76796	14.5614	0.576025	0.860116	0.0048	0.0211831	yes
ENSG00000157107.12	ENSG00000157107.12	FCHO2	chr5:72955980-73090522	Prone	Prot	OK	13.4115	19.9913	0.575907	1.43648	5e-05	0.00034525	yes
ENSG00000139718.9	ENSG00000139718.9	SETD1B	chr12:121804179-121832584	Prone	Prot	OK	0.741892	1.10563	0.575586	1.66997	5e-05	0.00034525	yes
ENSG00000102030.14	ENSG00000102030.14	NAA10	chrX:153861513-153935223	Prone	Prot	OK	50.8999	75.8121	0.574765	2.22585	5e-05	0.00034525	yes
ENSG00000138434.15	ENSG00000138434.15	SSFA2	chr2:181891832-181930738	Prone	Prot	OK	71.3623	106.268	0.574468	2.36054	5e-05	0.00034525	yes
ENSG00000266208.1	ENSG00000266208.1	CTD-2267D19.3	chr17:40360654-40364693	Prone	Prot	OK	3.00696	4.47707	0.574251	1.55706	5e-05	0.00034525	yes
ENSG00000031081.9	ENSG00000031081.9	ARHGAP31	chr3:119294372-119420714	Prone	Prot	OK	16.813	25.0298	0.574065	1.14418	5e-05	0.00034525	yes
ENSG00000266074.7	ENSG00000266074.7	BAHCC1	chr17:81395474-81466332	Prone	Prot	OK	1.29516	1.92781	0.573829	0.645783	0.01185	0.0453789	yes
ENSG00000188486.3	ENSG00000188486.3	H2AFX	chr11:119093853-119095467	Prone	Prot	OK	11.1181	16.5226	0.571525	2.10514	5e-05	0.00034525	yes
ENSG00000110880.9	ENSG00000110880.9	CORO1C	chr12:108645108-108731596	Prone	Prot	OK	67.9722	101.011	0.571491	2.53045	5e-05	0.00034525	yes
ENSG00000186111.7	ENSG00000186111.7	PIP5K1C	chr19:3630182-3700479	Prone	Prot	OK	7.98237	11.8604	0.571267	1.86908	5e-05	0.00034525	yes
ENSG00000277258.3	ENSG00000277258.3	PCGF2	chr17:38730234-38751457	Prone	Prot	OK	2.93995	4.3677	0.571081	1.1544	5e-05	0.00034525	yes
ENSG00000162755.12	ENSG00000162755.12	KLHDC9	chr1:161098360-161100346	Prone	Prot	OK	1.38497	2.05688	0.570608	0.569333	0.00815	0.0331167	yes
ENSG00000170836.10	ENSG00000170836.10	PPM1D	chr17:60600182-60666280	Prone	Prot	OK	7.26578	10.7801	0.569177	2.52936	5e-05	0.00034525	yes
ENSG00000148841.14	ENSG00000148841.14	ITPRIP	chr10:104309697-104338404	Prone	Prot	OK	19.3908	28.7585	0.568615	3.28176	5e-05	0.00034525	yes
ENSG00000162302.11	ENSG00000162302.11	RPS6KA4	chr11:64359147-64372215	Prone	Prot	OK	14.3399	21.2589	0.568031	1.93401	5e-05	0.00034525	yes
ENSG00000179862.6	ENSG00000179862.6	CITED4	chr1:40861050-40862366	Prone	Prot	OK	4.90003	7.26296	0.567768	1.25849	5e-05	0.00034525	yes
ENSG00000060762.17	ENSG00000060762.17	MPC1	chr6:166364918-166383013	Prone	Prot	OK	13.393	19.8488	0.567568	2.23203	5e-05	0.00034525	yes
ENSG00000171552.11	ENSG00000171552.11	BCL2L1	chr20:31664451-31723989	Prone	Prot	OK	11.7096	17.3522	0.567426	2.3463	5e-05	0.00034525	yes
ENSG00000110171.17	ENSG00000110171.17	TRIM3	chr11:6448612-6474459	Prone	Prot	OK	6.8385	10.1236	0.565977	1.36936	5e-05	0.00034525	yes
ENSG00000111206.11	ENSG00000111206.11	FOXM1	chr12:2794952-2941140	Prone	Prot	OK	4.80401	7.10732	0.565068	0.730401	0.0103	0.0402188	yes
ENSG00000100065.13	ENSG00000100065.13	CARD10	chr22:37490361-37519542	Prone	Prot	OK	20.8596	30.8604	0.565049	2.63523	5e-05	0.00034525	yes
ENSG00000125843.9	ENSG00000125843.9	AP5S1	chr20:3808356-3828837	Prone	Prot	OK	6.03417	8.92372	0.564491	1.68644	5e-05	0.00034525	yes
ENSG00000172197.10	ENSG00000172197.10	MBOAT1	chr6:20102144-20317739	Prone	Prot	OK	1.42484	2.10664	0.564145	1.22379	0.0001	0.000658879	yes
ENSG00000135090.12	ENSG00000135090.12	TAOK3	chr12:118149800-118372945	Prone	Prot	OK	8.27526	12.2278	0.563292	0.962073	0.00035	0.00208052	yes
ENSG00000160211.14	ENSG00000160211.14	G6PD	chrX:154531390-154565046	Prone	Prot	OK	32.4995	47.9635	0.561516	2.56577	5e-05	0.00034525	yes
ENSG00000279107.1	ENSG00000279107.1	RP11-823P9.4	chr5:21341832-21589372	Prone	Prot	OK	2.48128	3.66153	0.561364	0.861334	0.0034	0.015718	yes
ENSG00000187838.15	ENSG00000187838.15	TMEM256-PLSCR3	chr17:7380533-7404137	Prone	Prot	OK	14.3002	21.0967	0.560988	1.42044	5e-05	0.00034525	yes
ENSG00000281376.1	ENSG00000281376.1	ABALON	chr20:31664451-31723989	Prone	Prot	OK	10.4725	15.4464	0.560661	1.80081	5e-05	0.00034525	yes
ENSG00000015133.17	ENSG00000015133.17	CCDC88C	chr14:91271322-91417844	Prone	Prot	OK	11.3688	16.7659	0.560456	1.38876	5e-05	0.00034525	yes
ENSG00000186792.14	ENSG00000186792.14	HYAL3	chr3:50279026-50299468	Prone	Prot	OK	2.26868	3.34529	0.560277	0.67681	0.0127	0.0480983	yes
ENSG00000115556.12	ENSG00000115556.12	PLCD4	chr2:218607764-218637184	Prone	Prot	OK	1.24885	1.84091	0.559824	0.578642	0.0035	0.0161117	yes
ENSG00000140465.12	ENSG00000140465.12	CYP1A1	chr15:74719541-74725610	Prone	Prot	OK	33.0381	48.7009	0.559817	3.27046	5e-05	0.00034525	yes
ENSG00000127564.15	ENSG00000127564.15	PKMYT1	chr16:2963943-2980539	Prone	Prot	OK	0.952624	1.40367	0.559226	0.35407	0.0132	0.0495923	yes
ENSG00000163382.10	ENSG00000163382.10	APOA1BP	chr1:156591761-156594299	Prone	Prot	OK	80.8759	119.135	0.558816	3.24962	5e-05	0.00034525	yes
ENSG00000259948.2	ENSG00000259948.2	RP11-326A19.5	chr15:89087077-89202360	Prone	Prot	OK	7.06165	10.4011	0.558653	0.83398	0.0048	0.0211831	yes
ENSG00000182685.6	ENSG00000182685.6	BRICD5	chr16:2204247-2211950	Prone	Prot	OK	2.66025	3.91815	0.558612	0.735935	0.0124	0.0471267	yes
ENSG00000142494.12	ENSG00000142494.12	SLC47A1	chr17:19495384-19597922	Prone	Prot	OK	2.13616	3.14499	0.558031	0.924846	5e-05	0.00034525	yes
ENSG00000182481.7	ENSG00000182481.7	KPNA2	chr17:68035518-68046842	Prone	Prot	OK	44.1848	65.0206	0.557346	3.10432	5e-05	0.00034525	yes
ENSG00000103326.9	ENSG00000103326.9	CAPN15	chr16:527716-554636	Prone	Prot	OK	10.0295	14.7523	0.556685	1.60122	5e-05	0.00034525	yes
ENSG00000168062.8	ENSG00000168062.8	BATF2	chr11:64987942-64997045	Prone	Prot	OK	0.793389	1.16644	0.556011	0.708369	0.00275	0.0131664	yes
ENSG00000088325.14	ENSG00000088325.14	TPX2	chr20:31739270-31801805	Prone	Prot	OK	4.94771	7.27297	0.555784	2.69442	5e-05	0.00034525	yes
ENSG00000148180.15	ENSG00000148180.15	GSN	chr9:121178136-121332843	Prone	Prot	OK	230.511	338.607	0.554776	2.99439	5e-05	0.00034525	yes
ENSG00000166780.9	ENSG00000166780.9	C16orf45	chr16:15395753-15643166	Prone	Prot	OK	11.3674	16.6978	0.554758	1.2815	5e-05	0.00034525	yes
ENSG00000196872.9	ENSG00000196872.9	KIAA1211L	chr2:98793845-98936259	Prone	Prot	OK	4.07741	5.98874	0.554599	0.8412	0.00215	0.0105885	yes
ENSG00000221866.8	ENSG00000221866.8	PLXNA4	chr7:132123331-132648688	Prone	Prot	OK	1.35736	1.99353	0.554522	1.15212	5e-05	0.00034525	yes
ENSG00000267248.1	ENSG00000267248.1	CTD-2319I12.4	chr17:60126534-60135644	Prone	Prot	OK	2.40298	3.52907	0.554464	1.07727	0.0003	0.00181001	yes
ENSG00000146054.16	ENSG00000146054.16	TRIM7	chr5:181191923-181205293	Prone	Prot	OK	5.20774	7.64615	0.554076	1.11133	5e-05	0.00034525	yes
ENSG00000174007.7	ENSG00000174007.7	CEP19	chr3:196639685-196736007	Prone	Prot	OK	1.67921	2.46534	0.554001	0.931663	0.00165	0.00837775	yes
ENSG00000174059.15	ENSG00000174059.15	CD34	chr1:207880971-207911402	Prone	Prot	OK	42.637	62.5784	0.553559	2.87701	5e-05	0.00034525	yes
ENSG00000052795.11	ENSG00000052795.11	FNIP2	chr4:158769137-159038760	Prone	Prot	OK	6.38814	9.3741	0.553284	1.65418	5e-05	0.00034525	yes
ENSG00000157193.13	ENSG00000157193.13	LRP8	chr1:53226891-53328070	Prone	Prot	OK	5.33359	7.82561	0.553097	1.10619	5e-05	0.00034525	yes
ENSG00000115267.5	ENSG00000115267.5	IFIH1	chr2:162267078-162318703	Prone	Prot	OK	3.97432	5.82945	0.552651	1.97009	5e-05	0.00034525	yes
ENSG00000276043.3	ENSG00000276043.3	UHRF1	chr19:4903079-4962154	Prone	Prot	OK	1.67264	2.45165	0.551627	1.67491	5e-05	0.00034525	yes
ENSG00000103264.14	ENSG00000103264.14	FBXO31	chr16:87083561-87404779	Prone	Prot	OK	10.4371	15.2938	0.55123	0.970438	0.00025	0.00153863	yes
ENSG00000140937.12	ENSG00000140937.12	CDH11	chr16:64943752-65126112	Prone	Prot	OK	8.82674	12.9317	0.550957	1.24137	5e-05	0.00034525	yes
ENSG00000103037.10	ENSG00000103037.10	SETD6	chr16:58515478-58629886	Prone	Prot	OK	7.21634	10.5675	0.550288	0.661402	0.01145	0.0440385	yes
ENSG00000100154.13	ENSG00000100154.13	TTC28	chr22:27851668-28679865	Prone	Prot	OK	10.6667	15.6171	0.550011	0.856257	0.0028	0.0133514	yes
ENSG00000128591.14	ENSG00000128591.14	FLNC	chr7:128830376-128910719	Prone	Prot	OK	22.6587	33.1741	0.549989	2.54386	5e-05	0.00034525	yes
ENSG00000143774.15	ENSG00000143774.15	GUK1	chr1:228139961-228148984	Prone	Prot	OK	125.37	183.537	0.549887	3.04127	5e-05	0.00034525	yes
ENSG00000109089.7	ENSG00000109089.7	CDR2L	chr17:74987631-75005800	Prone	Prot	OK	7.10538	10.4019	0.549865	2.58876	5e-05	0.00034525	yes
ENSG00000047648.20	ENSG00000047648.20	ARHGAP6	chrX:11137542-11665701	Prone	Prot	OK	1.17883	1.72483	0.549089	1.33578	5e-05	0.00034525	yes
ENSG00000204442.3	ENSG00000204442.3	FAM155A	chr13:107163509-107866735	Prone	Prot	OK	0.881698	1.28968	0.548655	1.97466	5e-05	0.00034525	yes
ENSG00000147526.18	ENSG00000147526.18	TACC1	chr8:38728185-38853028	Prone	Prot	OK	77.7282	113.646	0.548042	2.08321	5e-05	0.00034525	yes
ENSG00000183260.6	ENSG00000183260.6	ABHD16B	chr20:63861211-63864293	Prone	Prot	OK	1.0861	1.58755	0.547642	0.759561	0.0095	0.0375631	yes
ENSG00000092445.10	ENSG00000092445.10	TYRO3	chr15:41557674-41583586	Prone	Prot	OK	5.54416	8.09906	0.546785	1.34693	5e-05	0.00034525	yes
ENSG00000135069.12	ENSG00000135069.12	PSAT1	chr9:78297142-78330093	Prone	Prot	OK	1.99131	2.90812	0.546368	1.50713	5e-05	0.00034525	yes
ENSG00000161647.17	ENSG00000161647.17	MPP3	chr17:43800798-43833170	Prone	Prot	OK	3.08304	4.5006	0.545762	0.76103	0.00185	0.00926643	yes
ENSG00000165804.14	ENSG00000165804.14	ZNF219	chr14:21016762-21104722	Prone	Prot	OK	7.794	11.3768	0.545653	1.31411	5e-05	0.00034525	yes
ENSG00000160753.14	ENSG00000160753.14	RUSC1	chr1:155308747-155331114	Prone	Prot	OK	10.2555	14.956	0.544331	0.93293	0.00095	0.00515192	yes
ENSG00000163191.5	ENSG00000163191.5	S100A11	chr1:151994530-152047907	Prone	Prot	OK	44.0031	64.1535	0.543924	2.57795	5e-05	0.00034525	yes
ENSG00000157110.14	ENSG00000157110.14	RBPMS	chr8:30382118-30572261	Prone	Prot	OK	8.12835	11.8372	0.542293	1.08746	5e-05	0.00034525	yes
ENSG00000214176.8	ENSG00000214176.8	PLEKHM1P	chr17:64749662-64837154	Prone	Prot	OK	6.3409	9.22526	0.540901	1.80857	5e-05	0.00034525	yes
ENSG00000142089.14	ENSG00000142089.14	IFITM3	chr11:318639-330122	Prone	Prot	OK	96.6257	140.57	0.54081	3.07649	5e-05	0.00034525	yes
ENSG00000158825.5	ENSG00000158825.5	CDA	chr1:20588947-20618908	Prone	Prot	OK	2.15085	3.12815	0.540405	0.989762	0.0008	0.00443048	yes
ENSG00000122359.16	ENSG00000122359.16	ANXA11	chr10:80150888-80205572	Prone	Prot	OK	38.0723	55.3716	0.540402	1.77025	5e-05	0.00034525	yes
ENSG00000137575.10	ENSG00000137575.10	SDCBP	chr8:58552923-58582860	Prone	Prot	OK	157.36	228.844	0.540292	3.24607	5e-05	0.00034525	yes
ENSG00000085662.12	ENSG00000085662.12	AKR1B1	chr7:134442349-134459284	Prone	Prot	OK	131.921	191.771	0.539709	3.34373	5e-05	0.00034525	yes
ENSG00000133119.11	ENSG00000133119.11	RFC3	chr13:33818048-33966558	Prone	Prot	OK	1.83915	2.67338	0.539622	1.30516	5e-05	0.00034525	yes
ENSG00000156049.6	ENSG00000156049.6	GNA14	chr9:77423078-77648307	Prone	Prot	OK	3.22373	4.68588	0.539588	1.7769	5e-05	0.00034525	yes
ENSG00000121671.10	ENSG00000121671.10	CRY2	chr11:45847117-45883248	Prone	Prot	OK	3.34248	4.85407	0.538275	1.00735	5e-05	0.00034525	yes
ENSG00000055813.5	ENSG00000055813.5	CCDC85A	chr2:55952157-56386173	Prone	Prot	OK	3.27379	4.75271	0.53779	1.48385	5e-05	0.00034525	yes
ENSG00000181523.11	ENSG00000181523.11	SGSH	chr17:80169991-80253500	Prone	Prot	OK	19.4693	28.2641	0.537766	1.46236	5e-05	0.00034525	yes
ENSG00000100368.12	ENSG00000100368.12	CSF2RB	chr22:36913627-36940449	Prone	Prot	OK	4.15191	6.02428	0.537012	2.22536	5e-05	0.00034525	yes
ENSG00000197208.5	ENSG00000197208.5	SLC22A4	chr5:132184875-132395614	Prone	Prot	OK	4.53949	6.58648	0.536978	0.828949	0.0036	0.016502	yes
ENSG00000102981.8	ENSG00000102981.8	PARD6A	chr16:67660945-67662778	Prone	Prot	OK	2.56673	3.72323	0.536622	1.13644	5e-05	0.00034525	yes
ENSG00000103769.8	ENSG00000103769.8	RAB11A	chr15:65611365-65891991	Prone	Prot	OK	121.232	175.748	0.535734	2.27995	5e-05	0.00034525	yes
ENSG00000163947.10	ENSG00000163947.10	ARHGEF3	chr3:56727417-57080101	Prone	Prot	OK	7.40466	10.7263	0.534643	1.785	5e-05	0.00034525	yes
ENSG00000173269.12	ENSG00000173269.12	MMRN2	chr10:86935539-87024732	Prone	Prot	OK	135.498	196.172	0.533848	2.95592	5e-05	0.00034525	yes
ENSG00000185340.14	ENSG00000185340.14	GAS2L1	chr22:29306581-29312785	Prone	Prot	OK	14.1629	20.4951	0.533167	2.26933	5e-05	0.00034525	yes
ENSG00000135956.7	ENSG00000135956.7	TMEM127	chr2:96248515-96265994	Prone	Prot	OK	16.2625	23.5178	0.532199	2.15357	5e-05	0.00034525	yes
ENSG00000147813.14	ENSG00000147813.14	NAPRT	chr8:143573489-143603224	Prone	Prot	OK	26.4857	38.2438	0.530011	0.91406	0.00195	0.00968475	yes
ENSG00000128918.13	ENSG00000128918.13	ALDH1A2	chr15:57953423-58569843	Prone	Prot	OK	2.41458	3.48516	0.529451	0.725061	0.0001	0.000658879	yes
ENSG00000158062.19	ENSG00000158062.19	UBXN11	chr1:26279175-26320523	Prone	Prot	OK	5.54378	8.00079	0.529271	1.19474	5e-05	0.00034525	yes
ENSG00000101452.13	ENSG00000101452.13	DHX35	chr20:38962298-39039723	Prone	Prot	OK	2.87312	4.14635	0.529224	1.4671	5e-05	0.00034525	yes
ENSG00000260077.1	ENSG00000260077.1	RP11-254F7.2	chr2:10039091-10040663	Prone	Prot	OK	0.8208	1.184	0.528561	0.874983	0.0033	0.0153311	yes
ENSG00000121957.11	ENSG00000121957.11	GPSM2	chr1:108815897-108963484	Prone	Prot	OK	7.15274	10.3122	0.527783	1.03606	0.00015	0.000961801	yes
ENSG00000170955.9	ENSG00000170955.9	PRKCDBP	chr11:6318945-6320647	Prone	Prot	OK	39.532	56.9768	0.527353	2.50183	5e-05	0.00034525	yes
ENSG00000160767.19	ENSG00000160767.19	FAM189B	chr1:155247204-155255483	Prone	Prot	OK	4.43416	6.38702	0.526481	1.46324	5e-05	0.00034525	yes
ENSG00000162923.13	ENSG00000162923.13	WDR26	chr1:224385142-224740549	Prone	Prot	OK	31.685	45.6315	0.526227	2.16865	5e-05	0.00034525	yes
ENSG00000173894.9	ENSG00000173894.9	CBX2	chr17:79778131-79787983	Prone	Prot	OK	5.34134	7.68939	0.525668	1.43439	5e-05	0.00034525	yes
ENSG00000104756.14	ENSG00000104756.14	KCTD9	chr8:25427846-25458476	Prone	Prot	OK	9.1236	13.126	0.524757	1.26665	5e-05	0.00034525	yes
ENSG00000262211.1	ENSG00000262211.1	CTD-2031P19.5	chr5:55935094-55994993	Prone	Prot	OK	112.737	162.183	0.524652	0.733787	0.01055	0.0409793	yes
ENSG00000250902.1	ENSG00000250902.1	SMAD1-AS1	chr4:145481193-145558079	Prone	Prot	OK	18.2727	26.2843	0.524517	0.933774	0.00165	0.00837775	yes
ENSG00000076108.10	ENSG00000076108.10	BAZ2A	chr12:56521928-56636816	Prone	Prot	OK	9.50625	13.6739	0.524472	0.834779	0.0031	0.0145458	yes
ENSG00000164403.13	ENSG00000164403.13	SHROOM1	chr5:132822140-132830898	Prone	Prot	OK	6.23718	8.97146	0.524449	0.897478	0.00125	0.0065814	yes
ENSG00000115414.17	ENSG00000115414.17	FN1	chr2:215360439-215436172	Prone	Prot	OK	516.136	742.327	0.524304	1.09047	5e-05	0.00034525	yes
ENSG00000114166.7	ENSG00000114166.7	KAT2B	chr3:20040022-20154404	Prone	Prot	OK	10.659	15.3219	0.523533	1.71506	5e-05	0.00034525	yes
ENSG00000177628.14	ENSG00000177628.14	GBA	chr1:155234451-155244699	Prone	Prot	OK	32.5499	46.7739	0.52305	2.11744	5e-05	0.00034525	yes
ENSG00000117713.16	ENSG00000117713.16	ARID1A	chr1:26696032-26782104	Prone	Prot	OK	1.91725	2.75401	0.522496	1.24247	5e-05	0.00034525	yes
ENSG00000166173.10	ENSG00000166173.10	LARP6	chr15:70829129-71053657	Prone	Prot	OK	11.6136	16.6768	0.522021	0.840729	0.0028	0.0133514	yes
ENSG00000151176.6	ENSG00000151176.6	PLBD2	chr12:113298758-113391625	Prone	Prot	OK	5.42999	7.79711	0.521988	1.2999	5e-05	0.00034525	yes
ENSG00000198951.10	ENSG00000198951.10	NAGA	chr22:41998724-42070842	Prone	Prot	OK	10.8475	15.5714	0.521531	2.43623	5e-05	0.00034525	yes
ENSG00000184182.17	ENSG00000184182.17	UBE2F	chr2:237966826-238099413	Prone	Prot	OK	17.0876	24.5171	0.520834	1.73425	5e-05	0.00034525	yes
ENSG00000103855.16	ENSG00000103855.16	CD276	chr15:73683965-73714518	Prone	Prot	OK	31.2548	44.8346	0.520535	2.0763	5e-05	0.00034525	yes
ENSG00000081913.12	ENSG00000081913.12	PHLPP1	chr18:62715449-62980433	Prone	Prot	OK	1.96334	2.8158	0.520231	1.00717	5e-05	0.00034525	yes
ENSG00000160447.6	ENSG00000160447.6	PKN3	chr9:128702522-128724127	Prone	Prot	OK	13.3722	19.1755	0.520026	1.59593	5e-05	0.00034525	yes
ENSG00000021355.11	ENSG00000021355.11	SERPINB1	chr6:2832331-2842006	Prone	Prot	OK	29.0999	41.7241	0.51987	2.28997	5e-05	0.00034525	yes
ENSG00000168826.14	ENSG00000168826.14	ZBTB49	chr4:4290250-4321786	Prone	Prot	OK	2.369	3.39481	0.519051	0.785058	0.00345	0.0159283	yes
ENSG00000117569.17	ENSG00000117569.17	PTBP2	chr1:96721664-96823738	Prone	Prot	OK	9.14594	13.1061	0.519035	1.54557	5e-05	0.00034525	yes
ENSG00000174951.9	ENSG00000174951.9	FUT1	chr19:48748010-48755390	Prone	Prot	OK	1.96704	2.81697	0.518116	1.3632	5e-05	0.00034525	yes
ENSG00000166979.11	ENSG00000166979.11	EVA1C	chr21:32412005-32515397	Prone	Prot	OK	11.8691	16.9883	0.517332	1.56999	5e-05	0.00034525	yes
ENSG00000196535.13	ENSG00000196535.13	MYO18A	chr17:29073516-29180412	Prone	Prot	OK	6.85191	9.80331	0.516763	0.812127	0.0001	0.000658879	yes
ENSG00000178695.5	ENSG00000178695.5	KCTD12	chr13:76880165-76886400	Prone	Prot	OK	243.974	348.944	0.51627	2.80924	5e-05	0.00034525	yes
ENSG00000160326.12	ENSG00000160326.12	SLC2A6	chr9:133471094-133479137	Prone	Prot	OK	9.26398	13.2495	0.51623	1.69219	5e-05	0.00034525	yes
ENSG00000164087.6	ENSG00000164087.6	POC1A	chr3:52075252-52154690	Prone	Prot	OK	1.34518	1.9227	0.515336	1.17164	5e-05	0.00034525	yes
ENSG00000100890.14	ENSG00000100890.14	KIAA0391	chr14:35044906-35317493	Prone	Prot	OK	20.5151	29.3187	0.515135	1.2197	5e-05	0.00034525	yes
ENSG00000104522.14	ENSG00000104522.14	TSTA3	chr8:143612617-143618048	Prone	Prot	OK	30.8628	44.1046	0.515062	2.3851	5e-05	0.00034525	yes
ENSG00000175602.3	ENSG00000175602.3	CCDC85B	chr11:65890111-65891635	Prone	Prot	OK	29.93	42.7701	0.515008	2.49871	5e-05	0.00034525	yes
ENSG00000182134.14	ENSG00000182134.14	TDRKH	chr1:151755540-151794402	Prone	Prot	OK	2.50921	3.58533	0.514875	0.70808	0.00305	0.014335	yes
ENSG00000134900.10	ENSG00000134900.10	TPP2	chr13:102597002-102679958	Prone	Prot	OK	17.0293	24.3299	0.514709	1.58119	5e-05	0.00034525	yes
ENSG00000143079.13	ENSG00000143079.13	CTTNBP2NL	chr1:112396180-112463456	Prone	Prot	OK	14.6862	20.9779	0.51441	1.99572	5e-05	0.00034525	yes
ENSG00000103168.15	ENSG00000103168.15	TAF1C	chr16:84145286-84187070	Prone	Prot	OK	20.4256	29.1399	0.512618	1.49949	5e-05	0.00034525	yes
ENSG00000152217.15	ENSG00000152217.15	SETBP1	chr18:44680172-45068510	Prone	Prot	OK	2.00137	2.85326	0.51162	0.764235	0.0072	0.0297625	yes
ENSG00000068305.16	ENSG00000068305.16	MEF2A	chr15:99565416-99733561	Prone	Prot	OK	16.0278	22.8482	0.511502	1.6011	5e-05	0.00034525	yes
ENSG00000189319.12	ENSG00000189319.12	FAM53B	chr10:124461833-124791870	Prone	Prot	OK	4.71082	6.71377	0.511145	1.66094	5e-05	0.00034525	yes
ENSG00000151689.11	ENSG00000151689.11	INPP1	chr2:189879608-190371665	Prone	Prot	OK	14.8729	21.1943	0.510995	1.65478	5e-05	0.00034525	yes
ENSG00000183856.9	ENSG00000183856.9	IQGAP3	chr1:156525404-156572604	Prone	Prot	OK	2.12312	3.02534	0.510913	1.39438	5e-05	0.00034525	yes
ENSG00000111907.19	ENSG00000111907.19	TPD52L1	chr6:125119048-125302078	Prone	Prot	OK	3.55402	5.06137	0.510074	0.924529	0.0003	0.00181001	yes
ENSG00000197409.7	ENSG00000197409.7	HIST1H3D	chr6:26196839-26197250	Prone	Prot	OK	43.0476	61.3032	0.51003	1.86952	5e-05	0.00034525	yes
ENSG00000183696.12	ENSG00000183696.12	UPP1	chr7:48088627-48108733	Prone	Prot	OK	32.7628	46.6256	0.509063	2.24988	5e-05	0.00034525	yes
ENSG00000095370.18	ENSG00000095370.18	SH2D3C	chr9:127738316-127778741	Prone	Prot	OK	22.893	32.5707	0.508668	2.46273	5e-05	0.00034525	yes
ENSG00000126243.7	ENSG00000126243.7	LRFN3	chr19:35935357-35945767	Prone	Prot	OK	2.50716	3.56691	0.508618	0.840702	0.00305	0.014335	yes
ENSG00000125966.9	ENSG00000125966.9	MMP24	chr20:35216461-35284985	Prone	Prot	OK	1.18966	1.69226	0.508398	0.767522	0.00905	0.036118	yes
ENSG00000066279.15	ENSG00000066279.15	ASPM	chr1:197084127-197146694	Prone	Prot	OK	3.98012	5.65981	0.507942	2.29942	5e-05	0.00034525	yes
ENSG00000181804.13	ENSG00000181804.13	SLC9A9	chr3:143265221-143848531	Prone	Prot	OK	2.61374	3.71626	0.507739	0.729427	0.0088	0.0353102	yes
ENSG00000101134.10	ENSG00000101134.10	DOK5	chr20:54475596-54651171	Prone	Prot	OK	7.88639	11.2118	0.507575	1.80048	5e-05	0.00034525	yes
ENSG00000131747.13	ENSG00000131747.13	TOP2A	chr17:40388515-40417950	Prone	Prot	OK	9.59145	13.6295	0.506911	2.17408	5e-05	0.00034525	yes
ENSG00000173621.8	ENSG00000173621.8	LRFN4	chr11:66848232-66958376	Prone	Prot	OK	10.1908	14.4756	0.506365	1.58695	5e-05	0.00034525	yes
ENSG00000272449.1	ENSG00000272449.1	RP3-395M20.12	chr1:2546464-2547460	Prone	Prot	OK	2.08456	2.96059	0.506146	0.813224	0.00515	0.0225023	yes
ENSG00000173402.10	ENSG00000173402.10	DAG1	chr3:49468702-49535618	Prone	Prot	OK	17.2453	24.4923	0.506124	1.51015	5e-05	0.00034525	yes
ENSG00000150756.12	ENSG00000150756.12	FAM173B	chr5:10226329-10249915	Prone	Prot	OK	6.84114	9.71154	0.505463	1.28254	5e-05	0.00034525	yes
ENSG00000134352.18	ENSG00000134352.18	IL6ST	chr5:55935094-55994993	Prone	Prot	OK	136.668	193.976	0.505207	1.27104	5e-05	0.00034525	yes
ENSG00000243927.4	ENSG00000243927.4	MRPS6	chr21:34073223-34360033	Prone	Prot	OK	11.5684	16.4125	0.504607	0.828525	0.00475	0.0210217	yes
ENSG00000010295.18	ENSG00000010295.18	IFFO1	chr12:6538374-6556083	Prone	Prot	OK	12.2205	17.3299	0.503952	2.35987	5e-05	0.00034525	yes
ENSG00000112561.16	ENSG00000112561.16	TFEB	chr6:41683977-41736259	Prone	Prot	OK	2.75033	3.90019	0.503942	0.677558	0.00075	0.00417984	yes
ENSG00000221821.3	ENSG00000221821.3	C6orf226	chr6:42890264-42890816	Prone	Prot	OK	3.45411	4.8949	0.502966	0.743055	0.00935	0.0370844	yes
ENSG00000198270.11	ENSG00000198270.11	TMEM116	chr12:111931281-112013185	Prone	Prot	OK	1.25031	1.76994	0.501407	0.41594	0.01035	0.0403805	yes
ENSG00000105889.13	ENSG00000105889.13	STEAP1B	chr7:22419443-22665533	Prone	Prot	OK	6.71658	9.50642	0.501175	1.33956	5e-05	0.00034525	yes
ENSG00000127946.15	ENSG00000127946.15	HIP1	chr7:75533299-75738962	Prone	Prot	OK	8.11902	11.4905	0.501063	1.36004	5e-05	0.00034525	yes
ENSG00000186787.7	ENSG00000186787.7	SPIN2B	chrX:57118550-57121547	Prone	Prot	OK	1.99466	2.82285	0.501009	0.808743	0.00305	0.014335	yes
ENSG00000101974.13	ENSG00000101974.13	ATP11C	chrX:139726345-139945276	Prone	Prot	OK	19.8475	28.0799	0.500586	2.23071	5e-05	0.00034525	yes
ENSG00000150977.10	ENSG00000150977.10	RILPL2	chr12:123410682-123436717	Prone	Prot	OK	4.03299	5.70582	0.500586	2.48143	5e-05	0.00034525	yes
ENSG00000111665.10	ENSG00000111665.10	CDCA3	chr12:6839953-6852066	Prone	Prot	OK	2.6564	3.7567	0.499991	0.721655	0.00825	0.0334748	yes
ENSG00000111846.14	ENSG00000111846.14	GCNT2	chr6:10492222-10629368	Prone	Prot	OK	1.57194	2.22247	0.499621	0.58104	0.00135	0.00701105	yes
ENSG00000119403.12	ENSG00000119403.12	PHF19	chr9:120855651-120894896	Prone	Prot	OK	15.0235	21.2408	0.499616	1.54303	5e-05	0.00034525	yes
ENSG00000103145.9	ENSG00000103145.9	HCFC1R1	chr16:3022619-3039133	Prone	Prot	OK	15.7081	22.2043	0.499335	1.2196	5e-05	0.00034525	yes
ENSG00000149115.12	ENSG00000149115.12	TNKS1BP1	chr11:57299637-57324952	Prone	Prot	OK	29.8007	42.1171	0.499062	1.56558	5e-05	0.00034525	yes
ENSG00000169710.6	ENSG00000169710.6	FASN	chr17:82078337-82098332	Prone	Prot	OK	14.7656	20.8652	0.498852	1.51722	5e-05	0.00034525	yes
ENSG00000167114.11	ENSG00000167114.11	SLC27A4	chr9:128340645-128361470	Prone	Prot	OK	11.8144	16.6723	0.49691	2.33565	5e-05	0.00034525	yes
ENSG00000138413.12	ENSG00000138413.12	IDH1	chr2:208236226-208266074	Prone	Prot	OK	38.3097	54.032	0.496102	2.86762	5e-05	0.00034525	yes
ENSG00000185883.9	ENSG00000185883.9	ATP6V0C	chr16:2475117-2531422	Prone	Prot	OK	18.7327	26.4188	0.49601	1.1275	5e-05	0.00034525	yes
ENSG00000123609.9	ENSG00000123609.9	NMI	chr2:151270464-151290057	Prone	Prot	OK	6.64564	9.3699	0.495625	1.56204	5e-05	0.00034525	yes
ENSG00000135926.11	ENSG00000135926.11	TMBIM1	chr2:218270391-218368099	Prone	Prot	OK	81.7686	115.232	0.494923	2.52511	5e-05	0.00034525	yes
ENSG00000107807.11	ENSG00000107807.11	TLX1	chr10:101089320-101137789	Prone	Prot	OK	1.64507	2.3181	0.494794	0.645252	0.00625	0.0264322	yes
ENSG00000179604.9	ENSG00000179604.9	CDC42EP4	chr17:73283623-73312175	Prone	Prot	OK	5.98822	8.43488	0.494241	1.32678	5e-05	0.00034525	yes
ENSG00000160949.15	ENSG00000160949.15	TONSL	chr8:144428774-144444444	Prone	Prot	OK	1.6208	2.28268	0.494023	1.48233	5e-05	0.00034525	yes
ENSG00000131981.14	ENSG00000131981.14	LGALS3	chr14:55124109-55145413	Prone	Prot	OK	60.5158	85.2225	0.493923	2.73644	5e-05	0.00034525	yes
ENSG00000130699.15	ENSG00000130699.15	TAF4	chr20:61953468-62065810	Prone	Prot	OK	1.73372	2.44145	0.493866	0.557709	0.009	0.0359796	yes
ENSG00000155254.11	ENSG00000155254.11	MARVELD1	chr10:97713172-97718152	Prone	Prot	OK	26.0767	36.7132	0.493537	2.62824	5e-05	0.00034525	yes
ENSG00000251562.6	ENSG00000251562.6	MALAT1	chr11:65497761-65506516	Prone	Prot	OK	1040	1463.54	0.492878	0.523822	0.0124	0.0471267	yes
ENSG00000112977.14	ENSG00000112977.14	DAP	chr5:10679229-10770294	Prone	Prot	OK	23.7171	33.3719	0.492707	2.28906	5e-05	0.00034525	yes
ENSG00000166025.16	ENSG00000166025.16	AMOTL1	chr11:94543839-94925521	Prone	Prot	OK	9.06079	12.7474	0.492492	2.22466	5e-05	0.00034525	yes
ENSG00000134323.10	ENSG00000134323.10	MYCN	chr2:15920398-15947007	Prone	Prot	OK	1.81579	2.55226	0.491181	1.28025	5e-05	0.00034525	yes
ENSG00000205213.12	ENSG00000205213.12	LGR4	chr11:27365960-27482433	Prone	Prot	OK	5.69233	8.00111	0.491179	1.51576	5e-05	0.00034525	yes
ENSG00000176890.14	ENSG00000176890.14	TYMS	chr18:596987-712676	Prone	Prot	OK	3.75857	5.28271	0.491094	0.920553	0.0008	0.00443048	yes
ENSG00000225792.1	ENSG00000225792.1	AC004540.4	chr7:26291894-26376701	Prone	Prot	OK	5.21284	7.32635	0.491024	0.813636	0.00645	0.0271478	yes
ENSG00000231925.10	ENSG00000231925.10	TAPBP	chr6:33299693-33314387	Prone	Prot	OK	35.8247	50.3255	0.490336	2.47869	5e-05	0.00034525	yes
ENSG00000184661.12	ENSG00000184661.12	CDCA2	chr8:25458996-25507920	Prone	Prot	OK	1.95797	2.75021	0.490178	0.880541	0.00105	0.00563785	yes
ENSG00000211445.10	ENSG00000211445.10	GPX3	chr5:151020437-151028993	Prone	Prot	OK	3.33737	4.68748	0.490102	0.825499	0.00105	0.00563785	yes
ENSG00000008517.15	ENSG00000008517.15	IL32	chr16:3065296-3087100	Prone	Prot	OK	13.765	19.3244	0.489423	1.65183	5e-05	0.00034525	yes
ENSG00000102908.19	ENSG00000102908.19	NFAT5	chr16:69565093-69704666	Prone	Prot	OK	9.87604	13.8626	0.489191	1.25883	5e-05	0.00034525	yes
ENSG00000245060.5	ENSG00000245060.5	LINC00847	chr5:180829953-180835726	Prone	Prot	OK	2.44434	3.43083	0.489115	0.885455	0.0018	0.00906105	yes
ENSG00000154556.16	ENSG00000154556.16	SORBS2	chr4:185585443-185956652	Prone	Prot	OK	18.0905	25.3884	0.488942	1.36757	5e-05	0.00034525	yes
ENSG00000243449.5	ENSG00000243449.5	C4orf48	chr4:2041992-2043970	Prone	Prot	OK	14.0665	19.7373	0.488659	0.996723	0.0009	0.0049186	yes
ENSG00000134690.9	ENSG00000134690.9	CDCA8	chr1:37692417-37709719	Prone	Prot	OK	1.556	2.18318	0.488586	1.33546	5e-05	0.00034525	yes
ENSG00000082438.14	ENSG00000082438.14	COBLL1	chr2:164653623-164849334	Prone	Prot	OK	3.35792	4.70827	0.48763	0.69192	0.00245	0.0119121	yes
ENSG00000173065.12	ENSG00000173065.12	FAM222B	chr17:28755977-28861067	Prone	Prot	OK	2.20695	3.09427	0.487544	0.607941	0.0063	0.0266038	yes
ENSG00000279442.1	ENSG00000279442.1	LA16c-60D12.2	chr22:15298377-15304556	Prone	Prot	OK	0.708774	0.993124	0.486648	1.38962	5e-05	0.00034525	yes
ENSG00000186350.9	ENSG00000186350.9	RXRA	chr9:134317097-134440585	Prone	Prot	OK	15.771	22.0801	0.485467	2.30114	5e-05	0.00034525	yes
ENSG00000013588.5	ENSG00000013588.5	GPRC5A	chr12:12890781-12917937	Prone	Prot	OK	5.81998	8.14717	0.485287	1.10923	0.0002	0.00125222	yes
ENSG00000267607.1	ENSG00000267607.1	CTD-2369P2.8	chr19:10251900-10289019	Prone	Prot	OK	2.17089	3.038	0.484838	0.9705	0.00105	0.00563785	yes
ENSG00000274641.1	ENSG00000274641.1	HIST1H2BO	chr6:27893462-27893843	Prone	Prot	OK	32.1016	44.9141	0.484523	1.61006	5e-05	0.00034525	yes
ENSG00000144369.11	ENSG00000144369.11	FAM171B	chr2:186590064-186765965	Prone	Prot	OK	12.0714	16.8781	0.483567	1.02879	0.00065	0.00366161	yes
ENSG00000152192.7	ENSG00000152192.7	POU4F1	chr13:77895480-78659179	Prone	Prot	OK	2.33877	3.26974	0.483425	1.24834	5e-05	0.00034525	yes
ENSG00000099194.5	ENSG00000099194.5	SCD	chr10:100347123-100364834	Prone	Prot	OK	29.7799	41.6212	0.48298	3.0759	5e-05	0.00034525	yes
ENSG00000182606.13	ENSG00000182606.13	TRAK1	chr3:42013801-42225889	Prone	Prot	OK	11.9717	16.7303	0.482832	2.38633	5e-05	0.00034525	yes
ENSG00000196139.10	ENSG00000196139.10	AKR1C3	chr10:4922563-5135226	Prone	Prot	OK	46.1329	64.4651	0.482722	2.49553	5e-05	0.00034525	yes
ENSG00000065613.12	ENSG00000065613.12	SLK	chr10:103967200-104029233	Prone	Prot	OK	14.5801	20.3709	0.482507	2.76432	5e-05	0.00034525	yes
ENSG00000013583.7	ENSG00000013583.7	HEBP1	chr12:12927725-13000273	Prone	Prot	OK	14.2753	19.9425	0.482327	1.86888	5e-05	0.00034525	yes
ENSG00000278730.1	ENSG00000278730.1	RP11-147L13.11	chr17:68125776-68152468	Prone	Prot	OK	21.7416	30.3723	0.482298	2.65068	5e-05	0.00034525	yes
ENSG00000156642.15	ENSG00000156642.15	NPTN	chr15:73443157-73634134	Prone	Prot	OK	41.733	58.2928	0.482128	2.17976	5e-05	0.00034525	yes
ENSG00000156521.12	ENSG00000156521.12	TYSND1	chr10:70137980-70146676	Prone	Prot	OK	2.52014	3.51995	0.482051	1.58275	5e-05	0.00034525	yes
ENSG00000135842.15	ENSG00000135842.15	FAM129A	chr1:184790723-184974550	Prone	Prot	OK	0.889791	1.24245	0.481654	0.784322	0.0005	0.00287873	yes
ENSG00000097021.18	ENSG00000097021.18	ACOT7	chr1:6264268-6394391	Prone	Prot	OK	21.1528	29.5274	0.481211	2.41913	5e-05	0.00034525	yes
ENSG00000161277.10	ENSG00000161277.10	THAP8	chr19:36014507-36054762	Prone	Prot	OK	2.03203	2.8358	0.480833	0.74541	0.00595	0.0253612	yes
ENSG00000121005.7	ENSG00000121005.7	CRISPLD1	chr8:74984514-75034558	Prone	Prot	OK	4.18391	5.83879	0.480819	0.917568	0.00135	0.00701105	yes
ENSG00000183741.10	ENSG00000183741.10	CBX6	chr22:38861449-38872314	Prone	Prot	OK	21.1182	29.4651	0.480523	2.73493	5e-05	0.00034525	yes
ENSG00000144136.9	ENSG00000144136.9	SLC20A1	chr2:112645856-112663827	Prone	Prot	OK	32.6899	45.5831	0.479653	1.91106	5e-05	0.00034525	yes
ENSG00000121152.8	ENSG00000121152.8	NCAPH	chr2:96335786-96373845	Prone	Prot	OK	1.49294	2.07751	0.476699	0.900348	0.0012	0.00634897	yes
ENSG00000196787.3	ENSG00000196787.3	HIST1H2AG	chr6:27133041-27135291	Prone	Prot	OK	9.28252	12.9149	0.476452	2.19759	5e-05	0.00034525	yes
ENSG00000140044.11	ENSG00000140044.11	JDP2	chr14:75423682-75474111	Prone	Prot	OK	1.89888	2.6419	0.47643	0.602086	0.0133	0.0499148	yes
ENSG00000162231.12	ENSG00000162231.12	NXF1	chr11:62792122-62806302	Prone	Prot	OK	12.5864	17.5093	0.476251	1.14535	5e-05	0.00034525	yes
ENSG00000205356.8	ENSG00000205356.8	TECPR1	chr7:98214623-98252251	Prone	Prot	OK	32.3167	44.9549	0.476202	1.08251	0.00095	0.00515192	yes
ENSG00000160298.16	ENSG00000160298.16	C21orf58	chr21:46300180-46323875	Prone	Prot	OK	1.76094	2.4488	0.475733	0.996451	0.00015	0.000961801	yes
ENSG00000128335.12	ENSG00000128335.12	APOL2	chr22:36226202-36239954	Prone	Prot	OK	14.1034	19.6118	0.475677	1.7909	5e-05	0.00034525	yes
ENSG00000124831.17	ENSG00000124831.17	LRRFIP1	chr2:237627575-237842808	Prone	Prot	OK	77.5774	107.876	0.475659	1.88099	5e-05	0.00034525	yes
ENSG00000117152.12	ENSG00000117152.12	RGS4	chr1:163068774-163076802	Prone	Prot	OK	2.81598	3.91501	0.47538	0.867933	0.0004	0.00235	yes
ENSG00000100994.10	ENSG00000100994.10	PYGB	chr20:25248068-25390983	Prone	Prot	OK	23.8027	33.088	0.475186	2.49761	5e-05	0.00034525	yes
ENSG00000260804.3	ENSG00000260804.3	PKI55	chr2:216217044-216220192	Prone	Prot	OK	1.06827	1.48472	0.474912	1.17227	5e-05	0.00034525	yes
ENSG00000237649.6	ENSG00000237649.6	KIFC1	chr6:33391535-33409924	Prone	Prot	OK	2.86822	3.98622	0.474866	1.19729	5e-05	0.00034525	yes
ENSG00000129250.10	ENSG00000129250.10	KIF1C	chr17:4997947-5028401	Prone	Prot	OK	59.8003	83.0969	0.474641	1.4558	5e-05	0.00034525	yes
ENSG00000003096.12	ENSG00000003096.12	KLHL13	chrX:117897812-118117340	Prone	Prot	OK	5.21395	7.24407	0.474424	1.4365	5e-05	0.00034525	yes
ENSG00000039523.16	ENSG00000039523.16	FAM65A	chr16:67517861-67546788	Prone	Prot	OK	8.69857	12.0833	0.474159	0.917671	0.0002	0.00125222	yes
ENSG00000166147.12	ENSG00000166147.12	FBN1	chr15:48408305-48645849	Prone	Prot	OK	50.5712	70.2457	0.474095	2.32067	5e-05	0.00034525	yes
ENSG00000054654.14	ENSG00000054654.14	SYNE2	chr14:63852982-64338599	Prone	Prot	OK	9.71312	13.4866	0.47352	0.907809	0.0001	0.000658879	yes
ENSG00000148400.9	ENSG00000148400.9	NOTCH1	chr9:136494443-136545862	Prone	Prot	OK	30.402	42.2109	0.47345	2.11521	5e-05	0.00034525	yes
ENSG00000143258.14	ENSG00000143258.14	USP21	chr1:161159449-161165723	Prone	Prot	OK	4.74913	6.59275	0.473218	1.123	5e-05	0.00034525	yes
ENSG00000119977.19	ENSG00000119977.19	TCTN3	chr10:95663395-95694143	Prone	Prot	OK	19.6199	27.2232	0.472521	1.55529	5e-05	0.00034525	yes
ENSG00000161847.12	ENSG00000161847.12	RAVER1	chr19:10304802-10339823	Prone	Prot	OK	3.64615	5.05762	0.472086	0.762832	0.0046	0.0204541	yes
ENSG00000184371.12	ENSG00000184371.12	CSF1	chr1:109910241-109930992	Prone	Prot	OK	6.91537	9.5831	0.470686	1.8611	5e-05	0.00034525	yes
ENSG00000115226.8	ENSG00000115226.8	FNDC4	chr2:27491882-27495245	Prone	Prot	OK	21.7338	30.1143	0.470511	2.18104	5e-05	0.00034525	yes
ENSG00000070423.16	ENSG00000070423.16	RNF126	chr19:647525-663277	Prone	Prot	OK	11.5172	15.9495	0.469724	1.54381	5e-05	0.00034525	yes
ENSG00000102384.12	ENSG00000102384.12	CENPI	chrX:101098217-101163681	Prone	Prot	OK	2.05561	2.84442	0.468573	0.841264	0.00185	0.00926643	yes
ENSG00000172059.9	ENSG00000172059.9	KLF11	chr2:10042848-10054866	Prone	Prot	OK	3.24321	4.48721	0.468395	1.04544	0.0002	0.00125222	yes
ENSG00000188229.5	ENSG00000188229.5	TUBB4B	chr9:137241212-137247770	Prone	Prot	OK	37.0353	51.2352	0.468237	2.67368	5e-05	0.00034525	yes
ENSG00000173456.4	ENSG00000173456.4	RNF26	chr11:119334526-119337313	Prone	Prot	OK	2.53985	3.51165	0.467407	1.38907	5e-05	0.00034525	yes
ENSG00000125945.13	ENSG00000125945.13	ZNF436	chr1:23359447-23371839	Prone	Prot	OK	8.2372	11.3889	0.467397	2.40438	5e-05	0.00034525	yes
ENSG00000265298.1	ENSG00000265298.1	RP13-104F24.3	chr17:64749662-64837154	Prone	Prot	OK	6.80372	9.39872	0.46614	0.829692	0.00425	0.0190783	yes
ENSG00000106853.15	ENSG00000106853.15	PTGR1	chr9:111525158-111599855	Prone	Prot	OK	70.9031	97.9416	0.466073	2.70491	5e-05	0.00034525	yes
ENSG00000155366.15	ENSG00000155366.15	RHOC	chr1:112701105-112715477	Prone	Prot	OK	272.986	377.022	0.465823	2.88723	5e-05	0.00034525	yes
ENSG00000169955.7	ENSG00000169955.7	ZNF747	chr16:30524000-30558498	Prone	Prot	OK	3.60237	4.9749	0.465723	0.927528	0.0022	0.0108159	yes
[truncated: 2,846 more rows]

## Sheet: up in AS flow
test_id	gene_id	gene	locus	sample_1	sample_2	status	value_1	value_2	log2(fold_change)	test_stat	p_value	q_value	significant
[truncated: 1,718 more rows]

[truncated: 1 more sheets: up in AP flow]
