# Supplementary material for: HIF-1α is required for disturbed flow-induced metabolic reprogramming in human and porcine vascular endothelium
Source: eLife journal article supplement (doi:10.7554/elife.25217), 2017-05-30
Supplement: supp [file elife-25217-supp-v1.zip › elife_poa_e25217_Figure_1_source_data_2.xlsx]

## Sheet: HALLMARK_HYPOXIA
GENE	GENE_TITLE	RANK IN GENE LIST	RANK METRIC SCORE	RUNNING ENRICHMENT SCORE
ANGPTL4	angiopoietin-like 4	3	4.35095	0.0276694
PPFIA4	protein tyrosine phosphatase, receptor type, f polypeptide (PTPRF), interacting protein (liprin), alpha 4	4	4.10778	0.0539965
IGFBP1	insulin-like growth factor binding protein 1	11	3.7169	0.0773859
IGFBP3	insulin-like growth factor binding protein 3	14	3.56676	0.100101
SLC2A1	solute carrier family 2 (facilitated glucose transporter), member 1	17	3.49646	0.122366
CXCR4	chemokine (C-X-C motif) receptor 4	26	3.18412	0.142197
ADM	adrenomedullin	37	2.9458	0.160356
ERRFI1	ERBB receptor feedback inhibitor 1	40	2.91911	0.178921
AK4	null	41	2.85005	0.197187
HK2	hexokinase 2	46	2.7802	0.214717
VEGFA	null	48	2.74681	0.23225
VLDLR	very low density lipoprotein receptor	52	2.67813	0.249198
SERPINE1	serpin peptidase inhibitor, clade E (nexin, plasminogen activator inhibitor type 1), member 1	66	2.50035	0.264286
MAFF	v-maf musculoaponeurotic fibrosarcoma oncogene homolog F (avian)	68	2.47432	0.280072
ALDOC	aldolase C, fructose-bisphosphate	74	2.41791	0.295208
PDGFB	platelet-derived growth factor beta polypeptide (simian sarcoma viral (v-sis) oncogene homolog)	75	2.39784	0.310576
SDC2	syndecan 2 (heparan sulfate proteoglycan 1, cell surface-associated, fibroglycan)	79	2.37981	0.325612
P4HA1	procollagen-proline, 2-oxoglutarate 4-dioxygenase (proline 4-hydroxylase), alpha polypeptide I	101	2.22281	0.338344
STC2	stanniocalcin 2	129	2.0863	0.34977
CDKN1C	cyclin-dependent kinase inhibitor 1C (p57, Kip2)	134	2.05128	0.362628
ENO2	enolase 2 (gamma, neuronal)	168	1.87621	0.372274
AKAP12	A kinase (PRKA) anchor protein (gravin) 12	178	1.82356	0.383313
MXI1	MAX interactor 1	184	1.79643	0.394466
CYR61	cysteine-rich, angiogenic inducer, 61	187	1.7919	0.405806
PFKP	phosphofructokinase, platelet	235	1.65648	0.413035
PGM1	phosphoglucomutase 1	237	1.65009	0.423539
CTGF	connective tissue growth factor	240	1.64352	0.433928
GBE1	glucan (1,4-alpha-), branching enzyme 1 (glycogen branching enzyme, Andersen disease, glycogen storage disease type IV)	244	1.638	0.44421
TPI1	triosephosphate isomerase 1	270	1.56521	0.45244
LXN	latexin	284	1.51619	0.46122
BNIP3L	BCL2/adenovirus E1B 19kDa interacting protein 3-like	293	1.49265	0.47021
PDK1	pyruvate dehydrogenase kinase, isozyme 1	298	1.48432	0.479435
SLC6A6	solute carrier family 6 (neurotransmitter transporter, taurine), member 6	352	1.39011	0.484524
ERO1L	ERO1-like (S. cerevisiae)	361	1.37486	0.492759
MT2A	metallothionein 2A	369	1.3548	0.500937
PFKFB3	6-phosphofructo-2-kinase/fructose-2,6-biphosphatase 3	379	1.34395	0.508902
STC1	stanniocalcin 1	380	1.33568	0.517463
PGF	placental growth factor, vascular endothelial growth factor-related protein	386	1.33231	0.525641
FOS	v-fos FBJ murine osteosarcoma viral oncogene homolog	406	1.30181	0.532615
EFNA1	ephrin-A1	423	1.27386	0.539626
ALDOA	aldolase A, fructose-bisphosphate	446	1.23464	0.545953
IER3	immediate early response 3	487	1.16548	0.55054
DPYSL4	dihydropyrimidinase-like 4	554	1.10701	0.552878
LOX	lysyl oxidase	576	1.08526	0.55832
KDELR3	KDEL (Lys-Asp-Glu-Leu) endoplasmic reticulum protein retention receptor 3	588	1.07234	0.5644
P4HA2	procollagen-proline, 2-oxoglutarate 4-dioxygenase (proline 4-hydroxylase), alpha polypeptide II	611	1.05919	0.569602
CITED2	Cbp/p300-interacting transactivator, with Glu/Asp-rich carboxy-terminal domain, 2	661	1.0187	0.572599
SLC2A3	solute carrier family 2 (facilitated glucose transporter), member 3	750	0.934542	0.572246
ENO1	enolase 1, (alpha)	783	0.913216	0.575793
PLIN2	null	846	0.866923	0.57688
SDC3	syndecan 3 (N-syndecan)	877	0.847395	0.580149
TMEM45A	transmembrane protein 45A	898	0.834023	0.584052
RORA	RAR-related orphan receptor A	973	0.788267	0.583771
TPBG	trophoblast glycoprotein	988	0.77769	0.587746
NDRG1	N-myc downstream regulated gene 1	999	0.772199	0.591974
JMJD6	null	1009	0.766056	0.596235
BHLHE40	null	1051	0.746289	0.598063
LDHA	lactate dehydrogenase A	1093	0.724702	0.599753
RRAGD	Ras-related GTP binding D	1099	0.723363	0.604028
JUN	jun oncogene	1114	0.71516	0.607603
TNFAIP3	tumor necrosis factor, alpha-induced protein 3	1137	0.70596	0.610542
PGK1	phosphoglycerate kinase 1	1176	0.688163	0.612213
ATP7A	ATPase, Cu++ transporting, alpha polypeptide (Menkes syndrome)	1244	0.657048	0.611595
EXT1	exostoses (multiple) 1	1275	0.642879	0.613553
MYH9	myosin, heavy chain 9, non-muscle	1292	0.633039	0.616457
ZNF292	zinc finger protein 292	1342	0.615836	0.616872
AMPD3	adenosine monophosphate deaminase (isoform E)	1383	0.607166	0.61788
MT1E	metallothionein 1E (functional)	1628	0.536409	0.603731
IRS2	insulin receptor substrate 2	1641	0.533744	0.606287
KDM3A	null	1669	0.527702	0.607723
CCRN4L	CCR4 carbon catabolite repression 4-like (S. cerevisiae)	1670	0.527429	0.611104
DCN	decorin	1845	0.4867	0.601682
FAM162A	null	1944	0.462014	0.597579
ENO3	enolase 3 (beta, muscle)	2002	0.451084	0.596362
ADORA2B	adenosine A2b receptor	2050	0.442693	0.595811
TGFB3	transforming growth factor, beta 3	2077	0.436457	0.596735
ISG20	interferon stimulated exonuclease gene 20kDa	2136	0.426818	0.59529
PAM	peptidylglycine alpha-amidating monooxygenase	2402	0.3831	0.578644
EFNA3	ephrin-A3	2449	0.376064	0.577739
ANKZF1	ankyrin repeat and zinc finger domain containing 1	2459	0.374608	0.579491
DDIT3	DNA-damage-inducible transcript 3	2467	0.374288	0.581386
XPNPEP1	X-prolyl aminopeptidase (aminopeptidase P) 1, soluble	2493	0.369586	0.581952
TGFBI	transforming growth factor, beta-induced, 68kDa	2563	0.361238	0.579294
CCNG2	cyclin G2	2612	0.355554	0.578113
SRPX	sushi-repeat-containing protein, X-linked	2659	0.347496	0.577025
PPP1R3C	protein phosphatase 1, regulatory (inhibitor) subunit 3C	2736	0.336623	0.573704
PFKL	phosphofructokinase, liver	2760	0.333838	0.574186
KLF6	Kruppel-like factor 6	2793	0.330346	0.573997
PIM1	pim-1 oncogene	2830	0.325838	0.573491
FOSL2	FOS-like antigen 2	2973	0.309116	0.565237
IDS	iduronate 2-sulfatase (Hunter syndrome)	2976	0.308521	0.56707
HDLBP	high density lipoprotein binding protein (vigilin)	2988	0.306843	0.568244
SIAH2	seven in absentia homolog 2 (Drosophila)	3092	0.294443	0.562707
BTG1	B-cell translocation gene 1, anti-proliferative	3274	0.275385	0.551426
NFIL3	nuclear factor, interleukin 3 regulated	3342	0.26992	0.548327
CASP6	caspase 6, apoptosis-related cysteine peptidase	3412	0.260661	0.545024
HK1	hexokinase 1	3532	0.249905	0.538048
GAPDH	glyceraldehyde-3-phosphate dehydrogenase	3606	0.244375	0.534353
GPI	glucose phosphate isomerase	3670	0.237818	0.531336
RBPJ	null	3767	0.228286	0.52588
F3	coagulation factor III (thromboplastin, tissue factor)	3818	0.223062	0.523706
PDK3	pyruvate dehydrogenase kinase, isozyme 3	3830	0.221129	0.52433
HSPA5	heat shock 70kDa protein 5 (glucose-regulated protein, 78kDa)	3889	0.216289	0.521536
WSB1	WD repeat and SOCS box-containing 1	4351	0.175241	0.489431
CDKN1B	cyclin-dependent kinase inhibitor 1B (p27, Kip1)	4418	0.169732	0.485762
COL5A1	collagen, type V, alpha 1	4430	0.16868	0.48605
EGFR	epidermal growth factor receptor (erythroblastic leukemia viral (v-erb-b) oncogene homolog, avian)	4445	0.167219	0.486113
TPD52	tumor protein D52	4523	0.161926	0.481601
SDC4	syndecan 4 (amphiglycan, ryudocan)	4529	0.161198	0.482274
VHL	von Hippel-Lindau tumor suppressor	4884	0.131732	0.457602
MIF	macrophage migration inhibitory factor (glycosylation-inhibiting factor)	4966	0.125016	0.452565
HEXA	hexosaminidase A (alpha polypeptide)	5052	0.11847	0.447198
KLHL24	kelch-like 24 (Drosophila)	5483	0.0861893	0.416757
PRDX5	peroxiredoxin 5	5529	0.0826252	0.414043
SAP30	Sin3A-associated protein, 30kDa	5871	0.057651	0.389834
NEDD4L	neural precursor cell expressed, developmentally down-regulated 4-like	6246	0.0314849	0.363079
PRKCA	protein kinase C, alpha	6275	0.0296853	0.361251
PPP1R15A	protein phosphatase 1, regulatory (inhibitor) subunit 15A	6292	0.0283241	0.36028
PHKG1	phosphorylase kinase, gamma 1 (muscle)	6402	0.0217397	0.352563
PNRC1	proline-rich nuclear receptor coactivator 1	7027	-0.0223758	0.30773
GRHPR	glyoxylate reductase/hydroxypyruvate reductase	7432	-0.0520073	0.278944
SELENBP1	selenium binding protein 1	7493	-0.0563969	0.274981
UGP2	UDP-glucose pyrophosphorylase 2	7556	-0.0602878	0.270898
NDST2	N-deacetylase/N-sulfotransferase (heparan glucosaminyl) 2	7580	-0.062745	0.269643
TES	testis derived transcript (3 LIM domains)	7765	-0.0750331	0.256861
PLAUR	plasminogen activator, urokinase receptor	8083	-0.0978319	0.23464
SCARB1	scavenger receptor class B, member 1	8255	-0.110955	0.223026
GAA	glucosidase, alpha; acid (Pompe disease, glycogen storage disease type II)	8575	-0.132701	0.200884
ILVBL	ilvB (bacterial acetolactate synthase)-like	8646	-0.138447	0.196726
SLC37A4	solute carrier family 37 (glycerol-6-phosphate transporter), member 4	8861	-0.156553	0.182304
B3GALT6	UDP-Gal:betaGal beta 1,3-galactosyltransferase polypeptide 6	9080	-0.174844	0.167712
NAGK	N-acetylglucosamine kinase	9168	-0.183121	0.162615
GALK1	galactokinase 1	9528	-0.212595	0.138102
MAP3K1	mitogen-activated protein kinase kinase kinase 1	9588	-0.21812	0.135247
DTNA	dystrobrevin, alpha	9805	-0.239094	0.121211
CAV1	caveolin 1, caveolae protein, 22kDa	9908	-0.248833	0.115454
PGM2	phosphoglucomutase 2	9994	-0.259099	0.110988
ANXA2	annexin A2	10389	-0.299826	0.0845111
SLC25A1	solute carrier family 25 (mitochondrial carrier; citrate transporter), member 1	10546	-0.318692	0.0753096
CP	ceruloplasmin (ferroxidase)	10961	-0.370356	0.0478432
NR3C1	nuclear receptor subfamily 3, group C, member 1 (glucocorticoid receptor)	11044	-0.381564	0.0443783
ZFP36	zinc finger protein 36, C3H type, homolog (mouse)	11104	-0.388058	0.0426129
FOXO3	null	11333	-0.42277	0.0288888
KLF7	Kruppel-like factor 7 (ubiquitous)	11364	-0.427132	0.029464
TIPARP	TCDD-inducible poly(ADP-ribose) polymerase	11401	-0.433413	0.029647
CHST2	carbohydrate (N-acetylglucosamine-6-O) sulfotransferase 2	11467	-0.443395	0.0278038
GYS1	glycogen synthase 1 (muscle)	11578	-0.463228	0.0228441
DUSP1	dual specificity phosphatase 1	11769	-0.498142	0.0123421
NDST1	N-deacetylase/N-sulfotransferase (heparan glucosaminyl) 1	12267	-0.609729	-0.0195725
CDKN1A	cyclin-dependent kinase inhibitor 1A (p21, Cip1)	12315	-0.624136	-0.01896
CHST3	carbohydrate (chondroitin 6) sulfotransferase 3	12350	-0.633119	-0.0173529
TPST2	tyrosylprotein sulfotransferase 2	12406	-0.648109	-0.0171634
ETS1	v-ets erythroblastosis virus E26 oncogene homolog 1 (avian)	12494	-0.671584	-0.0191299
PTRF	polymerase I and transcript release factor	12557	-0.693614	-0.0191533
GCNT2	glucosaminyl (N-acetyl) transferase 2, I-branching enzyme (I blood group)	12991	-0.857222	-0.0448687
PRKCDBP	protein kinase C, delta binding protein	13082	-0.903793	-0.0455632
GLRX	glutaredoxin (thioltransferase)	13222	-0.985114	-0.0492682
TGM2	transglutaminase 2 (C polypeptide, protein-glutamine-gamma-glutamyltransferase)	13262	-1.00871	-0.0456144
LARGE	like-glycosyltransferase	13359	-1.08237	-0.0455968
GPC1	glypican 1	13495	-1.21276	-0.0475545
BGN	biglycan	13597	-1.32886	-0.0463175
CSRP2	cysteine and glycine-rich protein 2	13657	-1.41898	-0.0414757
DDIT4	DNA-damage-inducible transcript 4	13811	-1.7526	-0.041271
HMOX1	heme oxygenase (decycling) 1	13947	-2.50436	-0.0349508
HS3ST1	heparan sulfate (glucosamine) 3-O-sulfotransferase 1	13948	-2.51747	-0.0188161
S100A4	S100 calcium binding protein A4	14014	-3.94802	0.00180201

## Sheet: HALLMARK_GLYCOLYSIS_mod.txt
GENE	GENE_TITLE	RANK IN GENE LIST	RANK METRIC SCORE	RUNNING ENRICHMENT SCORE
EGLN3	egl nine homolog 3 (C. elegans)	2	4.57267	0.0375748
ANGPTL4	angiopoietin-like 4	3	4.35095	0.0734648
PPFIA4	protein tyrosine phosphatase, receptor type, f polypeptide (PTPRF), interacting protein (liprin), alpha 4	4	4.10778	0.107349
IGFBP3	insulin-like growth factor binding protein 3	14	3.56676	0.136122
CXCR4	chemokine (C-X-C motif) receptor 4	26	3.18412	0.161594
AK4	null	41	2.85005	0.184094
HK2	hexokinase 2	46	2.7802	0.206739
VEGFA	null	48	2.74681	0.229325
SPAG4	sperm associated antigen 4	51	2.67906	0.25128
VLDLR	very low density lipoprotein receptor	52	2.67813	0.273371
SDC2	syndecan 2 (heparan sulfate proteoglycan 1, cell surface-associated, fibroglycan)	79	2.37981	0.291128
P4HA1	procollagen-proline, 2-oxoglutarate 4-dioxygenase (proline 4-hydroxylase), alpha polypeptide I	101	2.22281	0.30795
STC2	stanniocalcin 2	129	2.0863	0.323213
PLOD2	procollagen-lysine, 2-oxoglutarate 5-dioxygenase 2	145	1.99989	0.338629
SLC16A3	solute carrier family 16, member 3 (monocarboxylic acid transporter 4)	155	1.92884	0.353891
ENO2	enolase 2 (gamma, neuronal)	168	1.87621	0.368502
MXI1	MAX interactor 1	184	1.79643	0.38224
PFKP	phosphofructokinase, platelet	235	1.65648	0.3923
TPI1	triosephosphate isomerase 1	270	1.56521	0.402761
ANG	angiogenin, ribonuclease, RNase A family, 5	281	1.52821	0.414646
PYGL	phosphorylase, glycogen; liver (Hers disease, glycogen storage disease type VI)	286	1.51175	0.426827
CHST1	carbohydrate (keratan sulfate Gal-6) sulfotransferase 1	323	1.43888	0.436102
ERO1L	ERO1-like (S. cerevisiae)	361	1.37486	0.444776
STC1	stanniocalcin 1	380	1.33568	0.454497
ALDOA	aldolase A, fructose-bisphosphate	446	1.23464	0.459996
IER3	immediate early response 3	487	1.16548	0.466727
GLCE	UDP-glucuronic acid epimerase	551	1.11045	0.471346
DPYSL4	dihydropyrimidinase-like 4	554	1.10701	0.480334
MERTK	c-mer proto-oncogene tyrosine kinase	573	1.08586	0.487993
KDELR3	KDEL (Lys-Asp-Glu-Leu) endoplasmic reticulum protein retention receptor 3	588	1.07234	0.49583
P4HA2	procollagen-proline, 2-oxoglutarate 4-dioxygenase (proline 4-hydroxylase), alpha polypeptide II	611	1.05919	0.502981
PLOD1	procollagen-lysine 1, 2-oxoglutarate 5-dioxygenase 1	639	1.03706	0.50959
CITED2	Cbp/p300-interacting transactivator, with Glu/Asp-rich carboxy-terminal domain, 2	661	1.0187	0.516479
ENO1	enolase 1, (alpha)	783	0.913216	0.515292
SDC3	syndecan 3 (N-syndecan)	877	0.847395	0.515579
TPBG	trophoblast glycoprotein	988	0.77769	0.514066
PMM2	phosphomannomutase 2	1014	0.762991	0.518558
LDHA	lactate dehydrogenase A	1093	0.724702	0.518914
GALK2	galactokinase 2	1096	0.723649	0.524739
RRAGD	Ras-related GTP binding D	1099	0.723363	0.530562
PGK1	phosphoglycerate kinase 1	1176	0.688163	0.530761
IL13RA1	interleukin 13 receptor, alpha 1	1221	0.668759	0.533106
EXT1	exostoses (multiple) 1	1275	0.642879	0.534589
ZNF292	zinc finger protein 292	1342	0.615836	0.534913
PHKA2	phosphorylase kinase, alpha 2 (liver)	1349	0.613652	0.539542
GFPT1	glutamine-fructose-6-phosphate transaminase 1	1404	0.602274	0.540618
AKR1A1	aldo-keto reductase family 1, member A1 (aldehyde reductase)	1423	0.598132	0.544255
IRS2	insulin receptor substrate 2	1641	0.533744	0.533018
PGAM1	phosphoglycerate mutase 1 (brain)	1737	0.509979	0.530378
B4GALT2	UDP-Gal:betaGlcNAc beta 1,4- galactosyltransferase, polypeptide 2	1806	0.493677	0.529549
DCN	decorin	1845	0.4867	0.530825
FAM162A	null	1944	0.462014	0.527573
CTH	cystathionase (cystathionine gamma-lyase)	2047	0.44324	0.523878
ADORA2B	adenosine A2b receptor	2050	0.442693	0.527385
QSOX1	null	2068	0.438493	0.529777
ISG20	interferon stimulated exonuclease gene 20kDa	2136	0.426818	0.528469
PAM	peptidylglycine alpha-amidating monooxygenase	2402	0.3831	0.51253
EFNA3	ephrin-A3	2449	0.376064	0.512317
ANKZF1	ankyrin repeat and zinc finger domain containing 1	2459	0.374608	0.514758
TGFBI	transforming growth factor, beta-induced, 68kDa	2563	0.361238	0.510314
FKBP4	FK506 binding protein 4, 59kDa	2574	0.35978	0.512562
ALDH7A1	aldehyde dehydrogenase 7 family, member A1	2645	0.349448	0.510399
CD44	CD44 molecule (Indian blood group)	2673	0.346446	0.511311
HDLBP	high density lipoprotein binding protein (vigilin)	2988	0.306843	0.491211
MPI	mannose phosphate isomerase	2994	0.305709	0.493373
B4GALT7	xylosylprotein beta 1,4-galactosyltransferase, polypeptide 7 (galactosyltransferase I)	3115	0.291487	0.487128
AGL	amylo-1, 6-glucosidase, 4-alpha-glucanotransferase (glycogen debranching enzyme, glycogen storage disease type III)	3121	0.290417	0.489164
B4GALT4	UDP-Gal:betaGlcNAc beta 1,4- galactosyltransferase, polypeptide 4	3156	0.286457	0.489076
RARS	arginyl-tRNA synthetase	3218	0.280417	0.486993
SLC35A3	solute carrier family 35 (UDP-N-acetylglucosamine (UDP-GlcNAc) transporter), member A3	3228	0.279452	0.488649
CASP6	caspase 6, apoptosis-related cysteine peptidase	3412	0.260661	0.47761
AK3	adenylate kinase 3	3733	0.23126	0.456455
PDK3	pyruvate dehydrogenase kinase, isozyme 3	3830	0.221129	0.45136
HSPA5	heat shock 70kDa protein 5 (glucose-regulated protein, 78kDa)	3889	0.216289	0.448964
NOL3	nucleolar protein 3 (apoptosis repressor with CARD domain)	4180	0.18891	0.429621
ALDH9A1	aldehyde dehydrogenase 9 family, member A1	4290	0.179803	0.423249
HAX1	HCLS1 associated protein X-1	4352	0.17523	0.420298
MDH2	malate dehydrogenase 2, NAD (mitochondrial)	4420	0.169712	0.416869
COL5A1	collagen, type V, alpha 1	4430	0.16868	0.417611
EGFR	epidermal growth factor receptor (erythroblastic leukemia viral (v-erb-b) oncogene homolog, avian)	4445	0.167219	0.417982
COPB2	coatomer protein complex, subunit beta 2 (beta prime)	4772	0.143215	0.395668
NASP	nuclear autoantigenic sperm protein (histone-binding)	4850	0.135079	0.391232
MIF	macrophage migration inhibitory factor (glycosylation-inhibiting factor)	4966	0.125016	0.383975
TPST1	tyrosylprotein sulfotransferase 1	5200	0.10624	0.368059
CHPF2	null	5436	0.0891266	0.351857
BPNT1	3'(2'), 5'-bisphosphate nucleotidase 1	5489	0.0850773	0.348811
KIF2A	kinesin heavy chain member 2A	5596	0.0779713	0.341815
B3GAT3	beta-1,3-glucuronyltransferase 3 (glucuronosyltransferase I)	5601	0.0775919	0.342166
GMPPA	GDP-mannose pyrophosphorylase A	5625	0.0761544	0.341137
PPP2CB	protein phosphatase 2 (formerly 2A), catalytic subunit, beta isoform	5790	0.0633711	0.32984
SAP30	Sin3A-associated protein, 30kDa	5871	0.057651	0.32455
ECD	ecdysoneless homolog (Drosophila)	5955	0.0521677	0.318998
NDUFV3	NADH dehydrogenase (ubiquinone) flavoprotein 3, 10kDa	5998	0.0493959	0.316378
COG2	component of oligomeric golgi complex 2	6374	0.0234197	0.289544
POLR3K	polymerase (RNA) III (DNA directed) polypeptide K, 12.3 kDa	6435	0.0188464	0.285376
GALE	UDP-galactose-4-epimerase	6639	0.00471274	0.270784
VCAN	null	6854	-0.0110887	0.255452
PPIA	peptidylprolyl isomerase A (cyclophilin A)	6946	-0.017415	0.249037
PRPS1	phosphoribosyl pyrophosphate synthetase 1	6957	-0.0182572	0.248467
CYB5A	cytochrome b5 type A (microsomal)	7438	-0.052385	0.214304
UGP2	UDP-glucose pyrophosphorylase 2	7556	-0.0602878	0.206369
SDHC	succinate dehydrogenase complex, subunit C, integral membrane protein, 15kDa	7599	-0.0645981	0.203875
GNPDA1	glucosamine-6-phosphate deaminase 1	7630	-0.0662363	0.202259
RPE	ribulose-5-phosphate-3-epimerase	7848	-0.0808067	0.187286
MED24	null	7914	-0.0858376	0.18331
ARPP19	null	8249	-0.110444	0.160149
TXN	thioredoxin	8493	-0.127499	0.143687
TALDO1	transaldolase 1	8510	-0.128153	0.143591
MDH1	malate dehydrogenase 1, NAD (soluble)	8595	-0.13488	0.138649
PSMC4	proteasome (prosome, macropain) 26S subunit, ATPase, 4	8840	-0.154649	0.122339
SLC37A4	solute carrier family 37 (glycerol-6-phosphate transporter), member 4	8861	-0.156553	0.122189
ME2	malic enzyme 2, NAD(+)-dependent, mitochondrial	9037	-0.172163	0.110997
RBCK1	RanBP-type and C3HC4-type zinc finger containing 1	9076	-0.174658	0.109699
B3GALT6	UDP-Gal:betaGal beta 1,3-galactosyltransferase polypeptide 6	9080	-0.174844	0.110925
HMMR	hyaluronan-mediated motility receptor (RHAMM)	9092	-0.175707	0.111581
GMPPB	GDP-mannose pyrophosphorylase B	9272	-0.191507	0.10026
GUSB	glucuronidase, beta	9280	-0.192075	0.10134
EXT2	exostoses (multiple) 2	9377	-0.200562	0.0960755
GALK1	galactokinase 1	9528	-0.212595	0.0870183
NANP	N-acetylneuraminic acid phosphatase	9603	-0.219567	0.0834962
MET	met proto-oncogene (hepatocyte growth factor receptor)	9612	-0.220245	0.0847363
GOT2	glutamic-oxaloacetic transaminase 2, mitochondrial (aspartate aminotransferase 2)	9754	-0.234716	0.0765103
PAXIP1	PAX interacting (with transcription-activation domain) protein 1	9775	-0.236565	0.0770202
DLD	dihydrolipoamide dehydrogenase	9779	-0.236759	0.078757
HS2ST1	heparan sulfate 2-O-sulfotransferase 1	9836	-0.241638	0.0767142
XYLT2	xylosyltransferase II	9849	-0.242906	0.077853
PGM2	phosphoglucomutase 2	9994	-0.259099	0.0696118
PGLS	6-phosphogluconolactonase	10046	-0.265149	0.0681233
FUT8	fucosyltransferase 8 (alpha (1,6) fucosyltransferase)	10108	-0.271662	0.0659678
SOD1	superoxide dismutase 1, soluble (amyotrophic lateral sclerosis 1 (adult))	10205	-0.28008	0.0613592
CLN6	ceroid-lipofuscinosis, neuronal 6, late infantile, variant	10477	-0.310749	0.044391
AURKA	aurora kinase A	10665	-0.333649	0.0336657
ALG1	asparagine-linked glycosylation 1 homolog (S. cerevisiae, beta-1,4-mannosyltransferase)	10939	-0.36763	0.0170225
GOT1	glutamic-oxaloacetic transaminase 1, soluble (aspartate aminotransferase 1)	11385	-0.431175	-0.0114929
DEPDC1	DEP domain containing 1	11391	-0.43203	-0.00828953
CDK1	null	11398	-0.433234	-0.00514831
SRD5A3	null	11399	-0.433327	-0.00157389
NT5E	5'-nucleotidase, ecto (CD73)	11456	-0.442162	-0.00196263
CHST2	carbohydrate (N-acetylglucosamine-6-O) sulfotransferase 2	11467	-0.443395	0.000974115
STMN1	stathmin 1/oncoprotein 18	11571	-0.462477	-0.00263444
GYS1	glycogen synthase 1 (muscle)	11578	-0.463228	0.000754191
SLC25A10	solute carrier family 25 (mitochondrial carrier; dicarboxylate transporter), member 10	11732	-0.491616	-0.0062176
ME1	malic enzyme 1, NADP(+)-dependent, cytosolic	11739	-0.492925	-0.00258401
SLC25A13	solute carrier family 25, member 13 (citrin)	11745	-0.494721	0.00113648
LHPP	-	11787	-0.502869	0.00232958
IDUA	iduronidase, alpha-L-	11797	-0.505034	0.00584684
CAPN5	calpain 5	11966	-0.539055	-0.00181472
GCLC	glutamate-cysteine ligase, catalytic subunit	12128	-0.57765	-0.00865342
B4GALT1	UDP-Gal:betaGlcNAc beta 1,4- galactosyltransferase, polypeptide 1	12179	-0.588731	-0.00740071
CHST12	carbohydrate (chondroitin 4) sulfotransferase 12	12234	-0.601188	-0.00633353
CENPA	centromere protein A	12434	-0.654006	-0.0152811
PC	pyruvate carboxylase	12458	-0.661553	-0.0114818
GNE	glucosamine (UDP-N-acetyl)-2-epimerase/N-acetylmannosamine kinase	12609	-0.708656	-0.016447
NSDHL	NAD(P) dependent steroid dehydrogenase-like	12782	-0.771914	-0.0224761
KIF20A	kinesin family member 20A	12810	-0.7824	-0.0179682
PYGB	phosphorylase, glycogen; brain	12890	-0.816065	-0.0169304
IDH1	isocitrate dehydrogenase 1 (NADP+), soluble	12979	-0.851311	-0.0162504
TSTA3	tissue specific transplantation antigen P35B	13042	-0.88317	-0.0134338
G6PD	glucose-6-phosphate dehydrogenase	13186	-0.960939	-0.0158136
GLRX	glutaredoxin (thioltransferase)	13222	-0.985114	-0.0102101
ABCB6	ATP-binding cassette, sub-family B (MDR/TAP), member 6	13238	-0.993259	-0.00309801
GPC1	glypican 1	13495	-1.21276	-0.0115447
AGRN	null	13579	-1.30912	-0.00672801
DDIT4	DNA-damage-inducible transcript 4	13811	-1.7526	-0.00891984
SDC1	syndecan 1	13987	-3.06472	0.00374776
