# Supplementary material for: HIF-1α is required for disturbed flow-induced metabolic reprogramming in human and porcine vascular endothelium
Source: eLife journal article supplement (doi:10.7554/elife.25217), 2017-05-30
Supplement: supp [file elife-25217-supp-v1.zip › elife_poa_e25217_Figure_2_source_data_1.xlsx]

## Sheet: Upstream Analyses_Flow Seq
Upstream Regulator	Exp Log Ratio	Molecule Type	Predicted Activation State	Activation z-score	p-value of overlap	Target molecules in dataset	Mechanistic Network
KLF2	3.893	transcription regulator	Activated	3.281	6.54e-39	ACE,ACKR3,ADAM15,ADM,ANGPT2,APLN,ASS1,BMP4,CCND3,CD36,CD55,CD93,CTGF,CXCL2,CXCL8,CXCR4,CYP1B1,ECM1,EDN1,EFNA1,ELN,FGR,FLT1,HPSE,HYAL2,ID1,ID3,ITGB3,ITGB4,JUNB,KCNN4,KDR,KITLG,LTC4S,MT2A,NDRG1,NFKBIA,NOS3,NQO1,PGF,PLOD2,PLPP3,PTGDS,PTGIS,RALA,SERPINE1,SLC2A1,SLCO2A1,TCF4,TFPI2,TGFB1,THBD			38.1844
HIF1A	0.161	transcription regulator	Inhibited	-4.763	4.98e-35	ABCB1,ADAM15,ADAMTS1,ADM,AKAP12,ALDOA,ALDOC,ANGPTL4,ANKRD37,APLN,AXIN2,AXL,BCL2L1,BNIP3,BNIP3L,CTGF,CXCL2,CXCL8,CXCR4,CYR61,DLL4,EDN1,EGLN1,EGLN3,ENG,ENO2,ERO1A,FAM13A,FHL2,FLT1,GADD45B,GBE1,GJA1,HK2,HMOX1,IGFBP3,INHBB,ITGB3,KLHL20,LOX,MAFF,NDRG1,NOS3,NOTCH1,NOV,NOX4,NRARP,P4HA1,P4HA2,PDGFB,PDK1,PFKFB3,PFKFB4,PGF,PLOD2,PPFIA4,PTGIS,SERPINE1,SLC25A37,SLC29A1,SLC2A1,SLC2A3,SMAD7,SPAG4,SPHK1,STC2,SU…	300 (14)		34.3028
TP53	-0.032	transcription regulator		1.812	2.28e-34	A2M,ABCB1,ACE,ADRB2,AK1,AKAP12,AKR1B1,APOL1,AQP3,ASS1,ATP1A1,AXIN2,BBC3,BCL2L1,BNIP3,BTG2,CARHSP1,CCND3,CD59,CD82,CDC25B,CDC42EP3,CDKN2D,CTGF,CTSH,CTSK,CXCL1,CXCL8,CYP1A1,CYR61,DDIT4,DDIT4L,DGKA,DHCR24,DKK3,DPEP1,DUSP5,DUSP6,EDN1,EFNA1,EGR1,ENG,EPHX1,F2R,FABP3,FAM83D,FASN,FGF2,FHL2,FKBP5,FLRT2,G6PD,GPD1L,HDAC5,HIC1,HK2,HMOX1,HS3ST1,HSPA1A/HSPA1B,HYAL1,ID1,ID3,IDH1,IER3,IER5,IGFBP3,INHBA,ITGA2,ITG…	283 (16)		33.6421
EPAS1		transcription regulator	Inhibited	-3.56	3.02e-29	ACP5,ADM,AKAP12,ALDOC,ANGPT2,ANGPTL4,AXL,BBC3,BNIP3,CA12,CDC42EP5,CTGF,CXCL2,CXCR4,EDN1,EGLN3,ENO2,FAM13A,FASN,FLT1,GADD45B,GBE1,GJA1,IGFBP3,INHBB,ITGB3,KDR,LDLR,LOX,MAFF,NDRG1,NEAT1,NOS3,NOTCH1,NRARP,PFKFB3,PGF,PLIN2,PLOD2,SERPINE1,SLC29A1,SLC2A1,SLC2A3,SLC6A8,SPAG4,SPHK1,STC2,TEK,VEGFA			28.52
SMARCA4	0	transcription regulator		0.407	1.02e-20	A2M,ADAM15,ADGRG1,APOL3,ATP2B4,BMP4,BNIP3L,C8orf4,CCDC85B,CD52,CDKN2D,CFP,CLIC2,CTGF,CTSH,CXCR4,CYP1A1,DUSP6,EFNB1,EGR1,EMP3,EPHA4,ETS2,EVA1A,FHL2,GMFG,GPR68,HHIP,HS3ST1,HYI,ID3,IER3,IFI27,IFIT1,IFITM3,INHBA,IRF1,ITGA3,KDR,KHDRBS3,KIT,KLF8,LMNA,LOX,MAFF,MMP7,MN1,NR2F2,OCIAD2,PDE4B,PDK1,PGM2L1,PLAT,PLIN2,PLPP3,PON3,S100A2,S100A6,SDC2,SERPINE1,SERPINE2,SMAD6,SOX17,SPHK1,SPOCD1,TMEM171,TNFRSF10C,TNF…			19.9914
NKX2-3	1.016	transcription regulator	Inhibited	-4.152	3.11e-20	ADM,AIF1L,ALPL,ANGPT2,ANGPTL4,ANKRD37,BMP4,C8orf4,CD34,CD36,CD68,CERK,CSRNP1,CXADR,CXCL8,EDN1,F2RL1,F2RL3,FCN3,FGF2,FLRT2,GCH1,HSD17B2,KLF2,KLF4,LAP3,MMP7,NOS3,PAPSS2,PARP9,PAWR,PIM3,PLA1A,SERPINE2,SMAD7,SNCAIP,SRPX2,TFPI2,TMEM158,TNFRSF10D,ZNF704,ZNFX1			19.5072
ESR1	-0.309	ligand-dependent nuclear receptor		-0.703	3.34e-20	ABCA4,ABCB1,ACE,ACKR3,ADGRG6,AK1,AKAP13,AQP1,AQP3,ARHGAP18,ARL4D,ARSG,ASS1,AXIN2,BCL2L1,BMP4,C8orf4,CAMK1,CAPN2,CCND3,CD55,CD59,CDC42EP2,CDC42EP3,CDKN1C,CRABP2,CRIM1,CXADR,CXCL1,CXCL8,CYP1A1,CYP1B1,DDIT4,DUSP5,EDN1,EFEMP1,EFNA1,EGR1,F2RL1,FASN,G6PD,GADD45B,GJA1,HSPA2,HYAL1,ID1,IER3,IFI27,IFI44L,IFITM3,IGFBP3,INHBB,IRF1,ITGA6,JUNB,JUND,KLHL20,KRT7,LDLR,MAGI1,MALL,MAN1A1,METTL7A,MKI67,MX1,NFAT5,NFK…	345 (17)		19.4763
MYC	-0.109	transcription regulator	Inhibited	-2.368	3.81e-20	ADAMTS1,ADM,AKAP12,ALDOA,ANGPT2,AQP1,ASS1,BBC3,BCL2L1,BMPER,C9orf3,CAPN2,CCND3,CDC25B,CHST15,CLEC3B,CRABP2,CSRP2,CXCL8,DDIT4,DUSP5,DUSP6,ECM1,EDN1,EFEMP1,EGLN1,EGR1,EIF4EBP1,F2R,FABP5,FADS2,FASN,FBXO32,FKBP5,FTH1,G6PD,GADD45B,GDF3,GFPT1,GJA1,GPC1,HK2,HMOX1,ID1,ID3,IDH1,IER3,IER5,IFIT1,INHBA,ITGA3,ITGA6,KDR,KLF4,KRT7,LAMB3,LOC102724788/PRODH,LOX,LXN,MKI67,MMP7,MYO1B,NDRG1,NFAT5,NFKBIA,NQO1,OAS1,PD…	342 (17)		19.4191
PPARG	-0.853	ligand-dependent nuclear receptor		0.678	3.19e-18	ADRB2,ANGPTL4,AQP3,ARL4D,BCL2L1,CD36,CRABP2,CTGF,CXCL8,DGKA,EDN1,EGLN1,EGLN3,EIF4EBP1,ENO2,EPHX1,ERO1A,FABP3,FABP5,FASN,HK2,HMOX1,IDH1,IGFBP1,IGFBP3,IGFBP6,INSIG1,INSIG2,KLF4,LAMB3,LDLR,LOC102724788/PRODH,MKI67,MKNK2,NDRG1,NR2F2,OCLN,PFKFB3,PLIN2,PPARGC1B,PTPRF,PYGL,RHOB,SAT1,SCD,SDC1,SERPINE1,SLC2A1,SNCG,TBC1D2,TBXA2R,TCF4,TNFSF10,TSC22D3,UCP2,VEGFA,VLDLR	282 (16)		17.4962
SP1	0	transcription regulator		-0.55	6.71e-18	ABCB1,ADAMTS1,ADCY4,AKAP12,ALDH3A2,ALPL,ASS1,B4GALT5,BACE2,BBC3,BMP4,BNIP3L,CCND3,CD55,CD59,CD79B,CDC25B,CDKN2D,CRABP2,CTGF,CXCL8,CYP1B1,DHCR24,EGR1,ENG,F2R,FASN,FES,FGF2,FLT1,GJA1,HK2,HMOX1,HPSE,IFITM3,IGFBP1,IGFBP3,IRF1,ITGA2,KDR,KIT,KLF4,LDLR,MAOA,NDRG1,NFKBIA,NOS3,PDGFB,PDK1,SERPINE1,SERPINE2,SLC2A1,SLC2A3,SLC4A7,SMAD7,SNCG,TBXA2R,TFPI2,TGFB1,THBD,TNFRSF10B,TNFSF10,VEGFA	312 (16)		17.1733
