# Supplementary material for: HIF-1α is required for disturbed flow-induced metabolic reprogramming in human and porcine vascular endothelium
Source: eLife journal article supplement (doi:10.7554/elife.25217), 2017-05-30
Supplement: supp [file elife-25217-supp-v1.zip › elife_poa_e25217_Figure_2_source_data_2.xlsx]

## Sheet: All_Genes
test_id	gene_id	gene	locus	sample_1	sample_2	status	value_1	value_2	log2(fold_change)	test_stat	p_value	q_value	significant
ENSG00000000971.14	ENSG00000000971.14	CFH	chr1:196651877-196747504	Ctrl	siHIF1A	OK	33.6406	54.6987	0.701303	2.31864	5e-05	0.000604383	yes
ENSG00000002549.11	ENSG00000002549.11	LAP3	chr4:17577191-17614571	Ctrl	siHIF1A	OK	52.8307	83.2564	0.656184	2.49904	5e-05	0.000604383	yes
ENSG00000002822.14	ENSG00000002822.14	MAD1L1	chr7:1815792-2233243	Ctrl	siHIF1A	OK	6.94609	12.0778	0.798088	1.74853	5e-05	0.000604383	yes
ENSG00000003147.16	ENSG00000003147.16	ICA1	chr7:8113183-8344516	Ctrl	siHIF1A	OK	15.4079	22.9102	0.572321	1.56826	5e-05	0.000604383	yes
ENSG00000004799.7	ENSG00000004799.7	PDK4	chr7:95583498-95596491	Ctrl	siHIF1A	OK	2.32558	4.41777	0.925729	2.14468	5e-05	0.000604383	yes
ENSG00000005486.15	ENSG00000005486.15	RHBDD2	chr7:75842601-75888926	Ctrl	siHIF1A	OK	19.5567	13.8012	-0.502868	-1.66568	5e-05	0.000604383	yes
ENSG00000006468.12	ENSG00000006468.12	ETV1	chr7:13891227-13991425	Ctrl	siHIF1A	OK	5.52475	2.092	-1.40102	-2.31025	5e-05	0.000604383	yes
ENSG00000006576.15	ENSG00000006576.15	PHTF2	chr7:77798791-77957503	Ctrl	siHIF1A	OK	8.00596	4.50271	-0.830282	-2.46142	5e-05	0.000604383	yes
ENSG00000007312.11	ENSG00000007312.11	CD79B	chr17:63928739-63932354	Ctrl	siHIF1A	OK	1.87273	0.243637	-2.94233	-1.9562	5e-05	0.000604383	yes
ENSG00000007376.6	ENSG00000007376.6	RPUSD1	chr16:784973-800737	Ctrl	siHIF1A	OK	12.7987	19.478	0.605845	1.72153	5e-05	0.000604383	yes
ENSG00000007908.14	ENSG00000007908.14	SELE	chr1:169662006-169894267	Ctrl	siHIF1A	OK	1.56793	0.58011	-1.43446	-1.40284	5e-05	0.000604383	yes
ENSG00000008282.6	ENSG00000008282.6	SYPL1	chr7:106090502-106112576	Ctrl	siHIF1A	OK	55.6662	41.9021	-0.40978	-1.64269	5e-05	0.000604383	yes
ENSG00000008441.15	ENSG00000008441.15	NFIX	chr19:12995607-13098796	Ctrl	siHIF1A	OK	14.0803	6.91469	-1.02595	-3.2389	5e-05	0.000604383	yes
ENSG00000009780.14	ENSG00000009780.14	FAM76A	chr1:27725978-27763122	Ctrl	siHIF1A	OK	2.59815	4.09696	0.65707	1.73777	5e-05	0.000604383	yes
ENSG00000010319.5	ENSG00000010319.5	SEMA3G	chr3:52433052-52445085	Ctrl	siHIF1A	OK	8.07279	2.67661	-1.59266	-2.64987	5e-05	0.000604383	yes
ENSG00000010327.9	ENSG00000010327.9	STAB1	chr3:52495337-52770949	Ctrl	siHIF1A	OK	206.431	103.621	-0.99434	-1.52048	5e-05	0.000604383	yes
ENSG00000010404.16	ENSG00000010404.16	IDS	chrX:149476989-149550510	Ctrl	siHIF1A	OK	24.7374	11.1162	-1.15403	-2.56017	5e-05	0.000604383	yes
ENSG00000011007.11	ENSG00000011007.11	TCEB3	chr1:23743154-23778287	Ctrl	siHIF1A	OK	10.0443	14.3479	0.514467	1.52096	5e-05	0.000604383	yes
ENSG00000011028.12	ENSG00000011028.12	MRC2	chr17:62626030-62693597	Ctrl	siHIF1A	OK	21.1718	14.0771	-0.588793	-2.02861	5e-05	0.000604383	yes
ENSG00000011426.9	ENSG00000011426.9	ANLN	chr7:36324220-36453791	Ctrl	siHIF1A	OK	11.4536	5.78754	-0.984784	-2.82863	5e-05	0.000604383	yes
ENSG00000011465.15	ENSG00000011465.15	DCN	chr12:91140483-91183123	Ctrl	siHIF1A	OK	0.656836	0.151777	-2.11358	-0.565003	5e-05	0.000604383	yes
ENSG00000012174.10	ENSG00000012174.10	MBTPS2	chrX:21839635-21885424	Ctrl	siHIF1A	OK	3.97015	2.21867	-0.839494	-2.5884	5e-05	0.000604383	yes
ENSG00000013297.9	ENSG00000013297.9	CLDN11	chr3:170418864-170860380	Ctrl	siHIF1A	OK	24.7155	16.8296	-0.554412	-1.68407	5e-05	0.000604383	yes
ENSG00000014914.18	ENSG00000014914.18	MTMR11	chr1:149928650-149936898	Ctrl	siHIF1A	OK	15.955	11.0733	-0.526922	-1.52184	5e-05	0.000604383	yes
ENSG00000015413.8	ENSG00000015413.8	DPEP1	chr16:89613307-89638456	Ctrl	siHIF1A	OK	1.04816	2.78148	1.40799	2.09136	5e-05	0.000604383	yes
ENSG00000015676.16	ENSG00000015676.16	NUDCD3	chr7:44379120-44490880	Ctrl	siHIF1A	OK	22.905	39.3876	0.782082	2.06197	5e-05	0.000604383	yes
ENSG00000018408.13	ENSG00000018408.13	WWTR1	chr3:149517234-149736714	Ctrl	siHIF1A	OK	87.8354	46.7	-0.911379	-3.10867	5e-05	0.000604383	yes
ENSG00000023171.13	ENSG00000023171.13	GRAMD1B	chr11:123525635-123627774	Ctrl	siHIF1A	OK	1.93571	1.14929	-0.752119	-1.73589	5e-05	0.000604383	yes
ENSG00000023445.12	ENSG00000023445.12	BIRC3	chr11:102317449-102339403	Ctrl	siHIF1A	OK	2.31673	1.31206	-0.820256	-1.57246	5e-05	0.000604383	yes
ENSG00000024526.15	ENSG00000024526.15	DEPDC1	chr1:68474151-68538627	Ctrl	siHIF1A	OK	3.55189	1.87434	-0.9222	-1.8827	5e-05	0.000604383	yes
ENSG00000025039.13	ENSG00000025039.13	RRAGD	chr6:89364635-89412270	Ctrl	siHIF1A	OK	0.704634	0.197849	-1.83247	-2.03206	5e-05	0.000604383	yes
ENSG00000026103.18	ENSG00000026103.18	FAS	chr10:88879733-89015785	Ctrl	siHIF1A	OK	8.40546	14.2303	0.759569	1.79639	5e-05	0.000604383	yes
ENSG00000026508.15	ENSG00000026508.15	CD44	chr11:35138869-35232402	Ctrl	siHIF1A	OK	39.772	13.1021	-1.60196	-4.13028	5e-05	0.000604383	yes
ENSG00000026950.15	ENSG00000026950.15	BTN3A1	chr6:26402236-26415216	Ctrl	siHIF1A	OK	5.51881	10.0813	0.869259	2.26466	5e-05	0.000604383	yes
ENSG00000027697.11	ENSG00000027697.11	IFNGR1	chr6:137197483-137219449	Ctrl	siHIF1A	OK	45.5646	33.8835	-0.427331	-1.69166	5e-05	0.000604383	yes
ENSG00000027869.10	ENSG00000027869.10	SH2D2A	chr1:156806242-156881850	Ctrl	siHIF1A	OK	0.708071	0.207825	-1.76852	-1.48637	5e-05	0.000604383	yes
ENSG00000030582.15	ENSG00000030582.15	GRN	chr17:44345245-44353102	Ctrl	siHIF1A	OK	296.681	500.323	0.753948	2.38002	5e-05	0.000604383	yes
ENSG00000035499.11	ENSG00000035499.11	DEPDC1B	chr5:60596911-60700190	Ctrl	siHIF1A	OK	2.33246	0.876586	-1.41188	-2.49738	5e-05	0.000604383	yes
ENSG00000037241.6	ENSG00000037241.6	RPL26L1	chr5:172954785-172969771	Ctrl	siHIF1A	OK	10.48	17.1214	0.708168	2.2039	5e-05	0.000604383	yes
ENSG00000037280.14	ENSG00000037280.14	FLT4	chr5:180601505-180649624	Ctrl	siHIF1A	OK	4.249	8.4394	0.990018	2.63344	5e-05	0.000604383	yes
ENSG00000038274.15	ENSG00000038274.15	MAT2B	chr5:163503113-163519336	Ctrl	siHIF1A	OK	34.8468	49.5327	0.507358	1.96918	5e-05	0.000604383	yes
ENSG00000042493.14	ENSG00000042493.14	CAPG	chr2:85394747-85418432	Ctrl	siHIF1A	OK	13.4302	22.4196	0.739278	1.98278	5e-05	0.000604383	yes
ENSG00000042980.11	ENSG00000042980.11	ADAM28	chr8:24294039-24912073	Ctrl	siHIF1A	OK	1.13492	0.148645	-2.93265	-1.16787	5e-05	0.000604383	yes
ENSG00000047634.13	ENSG00000047634.13	SCML1	chrX:17737448-17754988	Ctrl	siHIF1A	OK	9.10806	4.35632	-1.06403	-3.36994	5e-05	0.000604383	yes
ENSG00000048052.20	ENSG00000048052.20	HDAC9	chr7:18086948-19002416	Ctrl	siHIF1A	OK	6.94737	4.42007	-0.652397	-1.35501	5e-05	0.000604383	yes
ENSG00000049283.16	ENSG00000049283.16	EPN3	chr17:50532542-50555852	Ctrl	siHIF1A	OK	0.329939	1.31483	1.99461	0.628724	5e-05	0.000604383	yes
ENSG00000049540.15	ENSG00000049540.15	ELN	chr7:74027788-74069907	Ctrl	siHIF1A	OK	0.664018	2.15724	1.69989	1.18369	5e-05	0.000604383	yes
ENSG00000050165.16	ENSG00000050165.16	DKK3	chr11:11963105-12009769	Ctrl	siHIF1A	OK	112.051	72.0611	-0.636867	-2.40744	5e-05	0.000604383	yes
ENSG00000051382.7	ENSG00000051382.7	PIK3CB	chr3:138652698-138834938	Ctrl	siHIF1A	OK	6.7925	3.98388	-0.769769	-1.51337	5e-05	0.000604383	yes
ENSG00000052795.11	ENSG00000052795.11	FNIP2	chr4:158769137-159038760	Ctrl	siHIF1A	OK	6.26602	3.61835	-0.792219	-1.66217	5e-05	0.000604383	yes
ENSG00000056277.14	ENSG00000056277.14	ZNF280C	chrX:130202710-130268899	Ctrl	siHIF1A	OK	2.41346	1.48365	-0.701948	-2.1426	5e-05	0.000604383	yes
ENSG00000056558.9	ENSG00000056558.9	TRAF1	chr9:120902392-120929173	Ctrl	siHIF1A	OK	1.07276	0.520857	-1.04237	-2.69987	5e-05	0.000604383	yes
ENSG00000057019.14	ENSG00000057019.14	DCBLD2	chr3:98714329-98901689	Ctrl	siHIF1A	OK	49.8608	71.9624	0.529338	1.28069	5e-05	0.000604383	yes
ENSG00000057757.8	ENSG00000057757.8	PITHD1	chr1:23778404-23788232	Ctrl	siHIF1A	OK	11.5199	16.0902	0.482054	1.65955	5e-05	0.000604383	yes
ENSG00000058085.13	ENSG00000058085.13	LAMC2	chr1:183186237-183244900	Ctrl	siHIF1A	OK	12.0223	19.8618	0.724282	2.30664	5e-05	0.000604383	yes
ENSG00000058799.12	ENSG00000058799.12	YIPF1	chr1:53851718-53889834	Ctrl	siHIF1A	OK	17.9651	11.748	-0.612786	-2.13311	5e-05	0.000604383	yes
ENSG00000059377.14	ENSG00000059377.14	TBXAS1	chr7:139561569-140020325	Ctrl	siHIF1A	OK	5.11307	1.35968	-1.91093	-1.32075	5e-05	0.000604383	yes
ENSG00000059378.11	ENSG00000059378.11	PARP12	chr7:140023743-140063721	Ctrl	siHIF1A	OK	26.0692	37.9629	0.542246	1.55873	5e-05	0.000604383	yes
ENSG00000060491.15	ENSG00000060491.15	OGFR	chr20:62796452-62814000	Ctrl	siHIF1A	OK	5.7191	21.6574	1.921	5.04741	5e-05	0.000604383	yes
ENSG00000060749.13	ENSG00000060749.13	QSER1	chr11:32893177-32993316	Ctrl	siHIF1A	OK	7.77557	4.47415	-0.797337	-1.54712	5e-05	0.000604383	yes
ENSG00000061656.8	ENSG00000061656.8	SPAG4	chr20:35615891-35621049	Ctrl	siHIF1A	OK	10.5766	4.55481	-1.21541	-2.79797	5e-05	0.000604383	yes
ENSG00000063587.13	ENSG00000063587.13	ZNF275	chrX:153334154-153360110	Ctrl	siHIF1A	OK	2.21311	1.40991	-0.650473	-1.98633	5e-05	0.000604383	yes
ENSG00000064205.9	ENSG00000064205.9	WISP2	chr20:44656450-44810338	Ctrl	siHIF1A	OK	0.525037	0.130621	-2.00703	-1.25598	5e-05	0.000604383	yes
ENSG00000064393.14	ENSG00000064393.14	HIPK2	chr7:139561569-140020325	Ctrl	siHIF1A	OK	7.84551	3.82078	-1.038	-3.37746	5e-05	0.000604383	yes
ENSG00000064651.12	ENSG00000064651.12	SLC12A2	chr5:128083765-128189688	Ctrl	siHIF1A	OK	40.1332	27.4073	-0.550236	-1.44646	5e-05	0.000604383	yes
ENSG00000064726.8	ENSG00000064726.8	BTBD1	chr15:82836945-83103443	Ctrl	siHIF1A	OK	41.3975	28.0105	-0.563575	-1.78987	5e-05	0.000604383	yes
ENSG00000065029.13	ENSG00000065029.13	ZNF76	chr6:35258908-35295985	Ctrl	siHIF1A	OK	7.17989	10.9343	0.606829	1.78417	5e-05	0.000604383	yes
ENSG00000065054.12	ENSG00000065054.12	SLC9A3R2	chr16:2025355-2039026	Ctrl	siHIF1A	OK	44.8543	75.8984	0.758822	2.9336	5e-05	0.000604383	yes
ENSG00000065559.13	ENSG00000065559.13	MAP2K4	chr17:11998352-12143830	Ctrl	siHIF1A	OK	12.5209	8.03707	-0.639597	-1.9371	5e-05	0.000604383	yes
ENSG00000065618.15	ENSG00000065618.15	COL17A1	chr10:104031285-104086002	Ctrl	siHIF1A	OK	0.81481	2.00246	1.29724	1.57657	5e-05	0.000604383	yes
ENSG00000066279.15	ENSG00000066279.15	ASPM	chr1:197084127-197146694	Ctrl	siHIF1A	OK	4.19851	1.88138	-1.15808	-3.77959	5e-05	0.000604383	yes
ENSG00000066583.10	ENSG00000066583.10	ISOC1	chr5:129094750-129114028	Ctrl	siHIF1A	OK	11.6052	7.88048	-0.558414	-1.91841	5e-05	0.000604383	yes
ENSG00000067445.19	ENSG00000067445.19	TRO	chrX:54920461-54931431	Ctrl	siHIF1A	OK	3.79299	0.942778	-2.00835	-2.28578	5e-05	0.000604383	yes
ENSG00000067955.12	ENSG00000067955.12	CBFB	chr16:67029115-67101058	Ctrl	siHIF1A	OK	40.119	20.6735	-0.956499	-3.26806	5e-05	0.000604383	yes
ENSG00000068079.6	ENSG00000068079.6	IFI35	chr17:43006724-43014456	Ctrl	siHIF1A	OK	9.81799	25.1858	1.35911	3.83721	5e-05	0.000604383	yes
ENSG00000069667.14	ENSG00000069667.14	RORA	chr15:60479177-61229319	Ctrl	siHIF1A	OK	13.9678	8.45214	-0.724715	-1.47056	5e-05	0.000604383	yes
ENSG00000069702.9	ENSG00000069702.9	TGFBR3	chr1:91680342-91906335	Ctrl	siHIF1A	OK	12.6927	7.81358	-0.699942	-2.27311	5e-05	0.000604383	yes
ENSG00000070061.13	ENSG00000070061.13	IKBKAP	chr9:108867516-108934116	Ctrl	siHIF1A	OK	7.01926	9.63263	0.456612	1.61827	5e-05	0.000604383	yes
ENSG00000070081.14	ENSG00000070081.14	NUCB2	chr11:17208152-17349974	Ctrl	siHIF1A	OK	28.6966	45.0499	0.650642	1.76419	5e-05	0.000604383	yes
ENSG00000070214.14	ENSG00000070214.14	SLC44A1	chr9:105244621-105439171	Ctrl	siHIF1A	OK	30.6816	16.4655	-0.897925	-2.65557	5e-05	0.000604383	yes
ENSG00000070367.14	ENSG00000070367.14	EXOC5	chr14:57200506-57298742	Ctrl	siHIF1A	OK	31.1174	48.8435	0.650446	1.64132	5e-05	0.000604383	yes
ENSG00000070404.8	ENSG00000070404.8	FSTL3	chr19:676364-683390	Ctrl	siHIF1A	OK	18.8238	12.9475	-0.539883	-1.77009	5e-05	0.000604383	yes
ENSG00000070756.12	ENSG00000070756.12	PABPC1	chr8:100685815-100722809	Ctrl	siHIF1A	OK	295.47	196.527	-0.588284	-1.49783	5e-05	0.000604383	yes
ENSG00000071242.10	ENSG00000071242.10	RPS6KA2	chr6:166409363-166957191	Ctrl	siHIF1A	OK	37.2855	21.8796	-0.76903	-2.27789	5e-05	0.000604383	yes
ENSG00000071564.13	ENSG00000071564.13	TCF3	chr19:1609289-1652605	Ctrl	siHIF1A	OK	29.6345	55.98	0.917636	2.62716	5e-05	0.000604383	yes
ENSG00000072163.17	ENSG00000072163.17	LIMS2	chr2:127638380-127681786	Ctrl	siHIF1A	OK	5.95656	14.7788	1.31098	3.54969	5e-05	0.000604383	yes
ENSG00000072840.11	ENSG00000072840.11	EVC	chr4:5711196-5893058	Ctrl	siHIF1A	OK	16.7778	9.72268	-0.787129	-1.398	5e-05	0.000604383	yes
ENSG00000073060.14	ENSG00000073060.14	SCARB1	chr12:124776855-124882668	Ctrl	siHIF1A	OK	24.3902	15.5079	-0.653303	-2.18697	5e-05	0.000604383	yes
ENSG00000073146.14	ENSG00000073146.14	MOV10L1	chr22:50089878-50161690	Ctrl	siHIF1A	OK	14.4909	23.7016	0.70984	2.1889	5e-05	0.000604383	yes
ENSG00000073712.12	ENSG00000073712.12	FERMT2	chr14:52857267-52952435	Ctrl	siHIF1A	OK	42.2339	31.1775	-0.437897	-1.75312	5e-05	0.000604383	yes
ENSG00000073969.17	ENSG00000073969.17	NSF	chr17:46590668-46757464	Ctrl	siHIF1A	OK	4.98056	7.7172	0.631769	1.7203	5e-05	0.000604383	yes
ENSG00000074410.12	ENSG00000074410.12	CA12	chr15:63321377-63382161	Ctrl	siHIF1A	OK	2.10253	0.264847	-2.9889	-2.62607	5e-05	0.000604383	yes
ENSG00000074527.10	ENSG00000074527.10	NTN4	chr12:95551581-95791152	Ctrl	siHIF1A	OK	50.9988	161.318	1.66138	4.93616	5e-05	0.000604383	yes
ENSG00000074800.12	ENSG00000074800.12	ENO1	chr1:8861001-8879894	Ctrl	siHIF1A	OK	899.764	503.639	-0.837155	-2.75373	5e-05	0.000604383	yes
ENSG00000075223.12	ENSG00000075223.12	SEMA3C	chr7:80742537-80922359	Ctrl	siHIF1A	OK	1.61521	0.813037	-0.99033	-1.30992	5e-05	0.000604383	yes
ENSG00000075240.15	ENSG00000075240.15	GRAMD4	chr22:46576011-46679790	Ctrl	siHIF1A	OK	4.68254	8.62751	0.881654	1.26836	5e-05	0.000604383	yes
ENSG00000075275.15	ENSG00000075275.15	CELSR1	chr22:46360833-46537170	Ctrl	siHIF1A	OK	0.643847	1.34928	1.0674	1.733	5e-05	0.000604383	yes
ENSG00000076003.4	ENSG00000076003.4	MCM6	chr2:135839625-135876426	Ctrl	siHIF1A	OK	4.67774	3.27224	-0.515532	-1.66212	5e-05	0.000604383	yes
ENSG00000076067.10	ENSG00000076067.10	RBMS2	chr12:56521928-56636816	Ctrl	siHIF1A	OK	11.7056	17.9317	0.615314	1.52068	5e-05	0.000604383	yes
ENSG00000077232.15	ENSG00000077232.15	DNAJC10	chr2:182716040-182794464	Ctrl	siHIF1A	OK	43.0335	67.5886	0.65132	1.72854	5e-05	0.000604383	yes
ENSG00000077585.12	ENSG00000077585.12	GPR137B	chr1:236142504-236281985	Ctrl	siHIF1A	OK	12.6457	8.25536	-0.615241	-1.70286	5e-05	0.000604383	yes
ENSG00000077713.17	ENSG00000077713.17	SLC25A43	chrX:119399059-119454478	Ctrl	siHIF1A	OK	5.45301	3.31629	-0.717483	-2.14192	5e-05	0.000604383	yes
ENSG00000078081.6	ENSG00000078081.6	LAMP3	chr3:183122212-183163839	Ctrl	siHIF1A	OK	0.831707	2.12282	1.35184	2.89892	5e-05	0.000604383	yes
ENSG00000078808.15	ENSG00000078808.15	SDF4	chr1:1216907-1232031	Ctrl	siHIF1A	OK	66.4078	92.6473	0.480398	1.74708	5e-05	0.000604383	yes
ENSG00000079332.13	ENSG00000079332.13	SAR1A	chr10:70147288-70170523	Ctrl	siHIF1A	OK	31.5345	42.75	0.438991	1.63463	5e-05	0.000604383	yes
ENSG00000079739.14	ENSG00000079739.14	PGM1	chr1:63440769-63660245	Ctrl	siHIF1A	OK	22.4246	8.48427	-1.40222	-4.37778	5e-05	0.000604383	yes
ENSG00000080845.16	ENSG00000080845.16	DLGAP4	chr20:36306335-36573391	Ctrl	siHIF1A	OK	18.0166	12.0444	-0.580957	-1.49997	5e-05	0.000604383	yes
ENSG00000081803.14	ENSG00000081803.14	CADPS2	chr7:122318424-122886759	Ctrl	siHIF1A	OK	11.2419	18.2459	0.698685	2.60298	5e-05	0.000604383	yes
ENSG00000081913.12	ENSG00000081913.12	PHLPP1	chr18:62715449-62980433	Ctrl	siHIF1A	OK	2.32764	4.02498	0.790116	1.81919	5e-05	0.000604383	yes
ENSG00000082397.14	ENSG00000082397.14	EPB41L3	chr18:5392380-5630700	Ctrl	siHIF1A	OK	18.6323	25.4728	0.451154	1.4181	5e-05	0.000604383	yes
ENSG00000082512.13	ENSG00000082512.13	TRAF5	chr1:211326614-211374946	Ctrl	siHIF1A	OK	14.5188	8.23839	-0.817486	-2.50186	5e-05	0.000604383	yes
ENSG00000082515.15	ENSG00000082515.15	MRPL22	chr5:154941069-154969411	Ctrl	siHIF1A	OK	18.7892	26.998	0.522953	1.67704	5e-05	0.000604383	yes
ENSG00000082641.14	ENSG00000082641.14	NFE2L1	chr17:48048328-48061487	Ctrl	siHIF1A	OK	52.3982	94.8597	0.856278	2.59279	5e-05	0.000604383	yes
ENSG00000083312.16	ENSG00000083312.16	TNPO1	chr5:72794404-72916733	Ctrl	siHIF1A	OK	188.858	119.873	-0.655795	-1.64249	5e-05	0.000604383	yes
ENSG00000084444.12	ENSG00000084444.12	KIAA1467	chr12:13044283-13142521	Ctrl	siHIF1A	OK	5.88964	3.64275	-0.693153	-1.98581	5e-05	0.000604383	yes
ENSG00000084463.6	ENSG00000084463.6	WBP11	chr12:14784578-14803540	Ctrl	siHIF1A	OK	5.62886	8.94998	0.669043	1.86809	5e-05	0.000604383	yes
ENSG00000084652.14	ENSG00000084652.14	TXLNA	chr1:32179685-32198285	Ctrl	siHIF1A	OK	20.5491	29.7183	0.532274	2.19692	5e-05	0.000604383	yes
ENSG00000085063.13	ENSG00000085063.13	CD59	chr11:33698260-33736445	Ctrl	siHIF1A	OK	727.104	1273.13	0.808146	2.15325	5e-05	0.000604383	yes
ENSG00000085117.10	ENSG00000085117.10	CD82	chr11:44564426-44620363	Ctrl	siHIF1A	OK	42.5539	23.9095	-0.831707	-2.43766	5e-05	0.000604383	yes
ENSG00000085365.16	ENSG00000085365.16	SCAMP1	chr5:78360582-78479071	Ctrl	siHIF1A	OK	26.5064	19.7694	-0.423073	-1.51856	5e-05	0.000604383	yes
ENSG00000085662.12	ENSG00000085662.12	AKR1B1	chr7:134442349-134459284	Ctrl	siHIF1A	OK	107.448	82.4257	-0.382469	-1.53791	5e-05	0.000604383	yes
ENSG00000086544.2	ENSG00000086544.2	ITPKC	chr19:40691528-40765389	Ctrl	siHIF1A	OK	5.84098	11.2772	0.949124	2.21951	5e-05	0.000604383	yes
ENSG00000086696.9	ENSG00000086696.9	HSD17B2	chr16:82035003-82139631	Ctrl	siHIF1A	OK	0.883462	5.21316	2.56092	3.84426	5e-05	0.000604383	yes
ENSG00000086827.7	ENSG00000086827.7	ZW10	chr11:113733186-113773811	Ctrl	siHIF1A	OK	4.62793	10.6022	1.19592	4.30633	5e-05	0.000604383	yes
ENSG00000087245.11	ENSG00000087245.11	MMP2	chr16:55389699-55506691	Ctrl	siHIF1A	OK	336.746	241.98	-0.476774	-1.37283	5e-05	0.000604383	yes
ENSG00000087253.10	ENSG00000087253.10	LPCAT2	chr16:55508997-55586670	Ctrl	siHIF1A	OK	48.7182	31.7109	-0.61948	-1.57967	5e-05	0.000604383	yes
ENSG00000087586.16	ENSG00000087586.16	AURKA	chr20:56369388-56392337	Ctrl	siHIF1A	OK	10.0597	6.44738	-0.641797	-1.94281	5e-05	0.000604383	yes
ENSG00000088280.17	ENSG00000088280.17	ASAP3	chr1:23428562-23484568	Ctrl	siHIF1A	OK	5.22604	9.64556	0.884147	2.09289	5e-05	0.000604383	yes
ENSG00000088325.14	ENSG00000088325.14	TPX2	chr20:31739270-31801805	Ctrl	siHIF1A	OK	7.29895	4.99483	-0.547254	-2.05648	5e-05	0.000604383	yes
ENSG00000088832.13	ENSG00000088832.13	FKBP1A	chr20:1309908-1393172	Ctrl	siHIF1A	OK	468.039	301.697	-0.633525	-2.18631	5e-05	0.000604383	yes
ENSG00000088881.19	ENSG00000088881.19	EBF4	chr20:2692877-2760108	Ctrl	siHIF1A	OK	2.41477	1.05384	-1.19622	-1.41811	5e-05	0.000604383	yes
ENSG00000088882.7	ENSG00000088882.7	CPXM1	chr20:2794068-2800637	Ctrl	siHIF1A	OK	1.26021	0.191586	-2.7176	-4.30364	5e-05	0.000604383	yes
ENSG00000089127.11	ENSG00000089127.11	OAS1	chr12:112906776-113017751	Ctrl	siHIF1A	OK	17.8468	66.1738	1.8906	2.61016	5e-05	0.000604383	yes
ENSG00000089157.14	ENSG00000089157.14	RPLP0	chr12:120196685-120201235	Ctrl	siHIF1A	OK	1286.07	885.322	-0.53869	-1.8111	5e-05	0.000604383	yes
ENSG00000089597.15	ENSG00000089597.15	GANAB	chr11:62624825-62646726	Ctrl	siHIF1A	OK	53.21	109.291	1.03841	3.28909	5e-05	0.000604383	yes
ENSG00000089737.14	ENSG00000089737.14	DDX24	chr14:94026328-94081245	Ctrl	siHIF1A	OK	24.017	33.7502	0.490839	1.57709	5e-05	0.000604383	yes
ENSG00000090581.8	ENSG00000090581.8	GNPTG	chr16:1351922-1414751	Ctrl	siHIF1A	OK	31.5233	47.647	0.595966	1.603	5e-05	0.000604383	yes
ENSG00000090889.11	ENSG00000090889.11	KIF4A	chrX:70286594-70420832	Ctrl	siHIF1A	OK	2.61238	1.31083	-0.994879	-1.56514	5e-05	0.000604383	yes
ENSG00000091129.18	ENSG00000091129.18	NRCAM	chr7:108147622-108456717	Ctrl	siHIF1A	OK	25.929	15.4902	-0.743213	-2.41926	5e-05	0.000604383	yes
ENSG00000091409.13	ENSG00000091409.13	ITGA6	chr2:172427353-172608669	Ctrl	siHIF1A	OK	47.8288	74.4621	0.638628	1.63796	5e-05	0.000604383	yes
ENSG00000091844.6	ENSG00000091844.6	RGS17	chr6:153004458-153131249	Ctrl	siHIF1A	OK	3.35671	1.56804	-1.09809	-2.63989	5e-05	0.000604383	yes
ENSG00000091879.12	ENSG00000091879.12	ANGPT2	chr8:6403550-6708209	Ctrl	siHIF1A	OK	38.4976	24.6628	-0.642433	-2.17743	5e-05	0.000604383	yes
ENSG00000092010.13	ENSG00000092010.13	PSME1	chr14:24136157-24141588	Ctrl	siHIF1A	OK	59.1369	82.3308	0.477374	1.8486	5e-05	0.000604383	yes
ENSG00000092096.13	ENSG00000092096.13	SLC22A17	chr14:23346305-23352912	Ctrl	siHIF1A	OK	1.28643	0.334154	-1.94479	-1.92564	5e-05	0.000604383	yes
ENSG00000092621.10	ENSG00000092621.10	PHGDH	chr1:119659797-119744215	Ctrl	siHIF1A	OK	1.83612	0.550906	-1.73679	-2.53296	5e-05	0.000604383	yes
ENSG00000092820.16	ENSG00000092820.16	EZR	chr6:158765740-158820593	Ctrl	siHIF1A	OK	27.9374	38.4442	0.460566	1.91369	5e-05	0.000604383	yes
ENSG00000093144.17	ENSG00000093144.17	ECHDC1	chr6:127288709-127343609	Ctrl	siHIF1A	OK	27.5689	12.4894	-1.14234	-3.57219	5e-05	0.000604383	yes
ENSG00000095383.18	ENSG00000095383.18	TBC1D2	chr9:98198998-98255721	Ctrl	siHIF1A	OK	4.10539	10.4912	1.35359	4.58592	5e-05	0.000604383	yes
ENSG00000095397.12	ENSG00000095397.12	DFNB31	chr9:114402079-114505450	Ctrl	siHIF1A	OK	1.27882	0.527422	-1.27778	-1.51787	5e-05	0.000604383	yes
ENSG00000095637.19	ENSG00000095637.19	SORBS1	chr10:95311770-95561414	Ctrl	siHIF1A	OK	1.14133	0.586692	-0.960039	-1.16981	5e-05	0.000604383	yes
ENSG00000095739.10	ENSG00000095739.10	BAMBI	chr10:28677341-28682939	Ctrl	siHIF1A	OK	5.63783	3.26477	-0.788159	-2.3133	5e-05	0.000604383	yes
ENSG00000096060.13	ENSG00000096060.13	FKBP5	chr6:35573584-35728583	Ctrl	siHIF1A	OK	5.78522	8.25195	0.512363	1.93229	5e-05	0.000604383	yes
ENSG00000096092.5	ENSG00000096092.5	TMEM14A	chr6:52671108-52686588	Ctrl	siHIF1A	OK	23.9137	14.6384	-0.708082	-2.37699	5e-05	0.000604383	yes
ENSG00000096433.9	ENSG00000096433.9	ITPR3	chr6:33620364-33711727	Ctrl	siHIF1A	OK	20.102	34.7097	0.787999	2.82087	5e-05	0.000604383	yes
ENSG00000099194.5	ENSG00000099194.5	SCD	chr10:100347123-100364834	Ctrl	siHIF1A	OK	68.2792	35.8897	-0.927874	-3.77814	5e-05	0.000604383	yes
ENSG00000099337.4	ENSG00000099337.4	KCNK6	chr19:38319843-38332076	Ctrl	siHIF1A	OK	2.10388	4.53553	1.10822	2.10946	5e-05	0.000604383	yes
ENSG00000099864.16	ENSG00000099864.16	PALM	chr19:709092-748330	Ctrl	siHIF1A	OK	3.27377	5.87908	0.844638	2.48421	5e-05	0.000604383	yes
ENSG00000099942.11	ENSG00000099942.11	CRKL	chr22:20917425-20953749	Ctrl	siHIF1A	OK	18.6624	10.611	-0.81458	-3.32099	5e-05	0.000604383	yes
ENSG00000100056.10	ENSG00000100056.10	DGCR14	chr22:19130278-19144684	Ctrl	siHIF1A	OK	6.46127	9.83592	0.606243	1.99843	5e-05	0.000604383	yes
ENSG00000100065.13	ENSG00000100065.13	CARD10	chr22:37490361-37519542	Ctrl	siHIF1A	OK	17.25	31.9559	0.88949	2.83415	5e-05	0.000604383	yes
ENSG00000100100.11	ENSG00000100100.11	PIK3IP1	chr22:31281592-31346232	Ctrl	siHIF1A	OK	13.8002	7.69971	-0.841814	-2.19995	5e-05	0.000604383	yes
ENSG00000100106.18	ENSG00000100106.18	TRIOBP	chr22:37681672-37776556	Ctrl	siHIF1A	OK	23.626	50.7112	1.10193	3.26626	5e-05	0.000604383	yes
ENSG00000100151.14	ENSG00000100151.14	PICK1	chr22:38056310-38075701	Ctrl	siHIF1A	OK	4.21584	7.24845	0.781853	1.90173	5e-05	0.000604383	yes
ENSG00000100162.13	ENSG00000100162.13	CENPM	chr22:41938720-41947164	Ctrl	siHIF1A	OK	5.17488	2.57206	-1.0086	-1.95547	5e-05	0.000604383	yes
ENSG00000100216.5	ENSG00000100216.5	TOMM22	chr22:38681947-38685421	Ctrl	siHIF1A	OK	14.9926	40.5275	1.43465	4.29039	5e-05	0.000604383	yes
ENSG00000100234.11	ENSG00000100234.11	TIMP3	chr22:32512551-33058372	Ctrl	siHIF1A	OK	0.669778	0.12527	-2.41864	-3.98243	5e-05	0.000604383	yes
ENSG00000100316.14	ENSG00000100316.14	RPL3	chr22:39312881-39320389	Ctrl	siHIF1A	OK	984.365	709.22	-0.472961	-1.54986	5e-05	0.000604383	yes
ENSG00000100321.13	ENSG00000100321.13	SYNGR1	chr22:39349924-39385588	Ctrl	siHIF1A	OK	1.83606	0.744897	-1.3015	-1.50828	5e-05	0.000604383	yes
ENSG00000100335.11	ENSG00000100335.11	MIEF1	chr22:39499431-39518132	Ctrl	siHIF1A	OK	11.2716	7.6989	-0.549971	-1.58025	5e-05	0.000604383	yes
ENSG00000100342.19	ENSG00000100342.19	APOL1	chr22:36253009-36267530	Ctrl	siHIF1A	OK	10.0053	20.8277	1.05775	3.50989	5e-05	0.000604383	yes
ENSG00000100345.19	ENSG00000100345.19	MYH9	chr22:36281280-36388018	Ctrl	siHIF1A	OK	190.928	291.331	0.609631	1.14325	5e-05	0.000604383	yes
ENSG00000100360.13	ENSG00000100360.13	IFT27	chr22:36758201-36776256	Ctrl	siHIF1A	OK	8.80146	21.087	1.26054	3.0369	5e-05	0.000604383	yes
ENSG00000100368.12	ENSG00000100368.12	CSF2RB	chr22:36913627-36940449	Ctrl	siHIF1A	OK	8.51685	3.08648	-1.46436	-5.2207	5e-05	0.000604383	yes
ENSG00000100376.10	ENSG00000100376.10	FAM118A	chr22:45308967-45341955	Ctrl	siHIF1A	OK	26.1462	14.4599	-0.854545	-2.19854	5e-05	0.000604383	yes
ENSG00000100393.9	ENSG00000100393.9	EP300	chr22:41091785-41197456	Ctrl	siHIF1A	OK	6.65415	4.76675	-0.481251	-1.84772	5e-05	0.000604383	yes
ENSG00000100410.6	ENSG00000100410.6	PHF5A	chr22:41459716-41468725	Ctrl	siHIF1A	OK	11.6032	21.4546	0.886771	2.85285	5e-05	0.000604383	yes
ENSG00000100426.6	ENSG00000100426.6	ZBED4	chr22:49853841-49890078	Ctrl	siHIF1A	OK	4.24088	6.62328	0.643182	2.491	5e-05	0.000604383	yes
ENSG00000100600.13	ENSG00000100600.13	LGMN	chr14:92703806-92748702	Ctrl	siHIF1A	OK	32.888	51.0511	0.634382	2.24805	5e-05	0.000604383	yes
ENSG00000100625.8	ENSG00000100625.8	SIX4	chr14:60709527-60724348	Ctrl	siHIF1A	OK	1.96232	0.849164	-1.20845	-2.94403	5e-05	0.000604383	yes
ENSG00000100644.15	ENSG00000100644.15	HIF1A	chr14:61681040-61796428	Ctrl	siHIF1A	OK	131.029	26.6819	-2.29596	-4.40689	5e-05	0.000604383	yes
ENSG00000100697.13	ENSG00000100697.13	DICER1	chr14:95086227-95179933	Ctrl	siHIF1A	OK	20.1088	12.1295	-0.729305	-1.67936	5e-05	0.000604383	yes
ENSG00000100711.12	ENSG00000100711.12	ZFYVE21	chr14:103715729-103733668	Ctrl	siHIF1A	OK	25.7936	37.8292	0.55249	1.96634	5e-05	0.000604383	yes
ENSG00000100852.11	ENSG00000100852.11	ARHGAP5	chr14:32074945-32159728	Ctrl	siHIF1A	OK	15.8699	10.3562	-0.615791	-2.07614	5e-05	0.000604383	yes
ENSG00000101000.4	ENSG00000101000.4	PROCR	chr20:35172072-35177362	Ctrl	siHIF1A	OK	229.086	146.633	-0.643674	-2.56815	5e-05	0.000604383	yes
ENSG00000101017.12	ENSG00000101017.12	CD40	chr20:46118271-46129863	Ctrl	siHIF1A	OK	11.1978	7.51916	-0.574576	-1.85908	5e-05	0.000604383	yes
ENSG00000101096.18	ENSG00000101096.18	NFATC2	chr20:51386956-51562831	Ctrl	siHIF1A	OK	3.13391	1.32971	-1.23685	-2.81916	5e-05	0.000604383	yes
ENSG00000101166.14	ENSG00000101166.14	SLMO2	chr20:59033144-59042909	Ctrl	siHIF1A	OK	24.003	14.4744	-0.729706	-2.37572	5e-05	0.000604383	yes
ENSG00000101187.14	ENSG00000101187.14	SLCO4A1	chr20:62640718-62685785	Ctrl	siHIF1A	OK	7.51836	3.55838	-1.0792	-2.74046	5e-05	0.000604383	yes
ENSG00000101265.14	ENSG00000101265.14	RASSF2	chr20:4780022-4823645	Ctrl	siHIF1A	OK	23.4204	12.6703	-0.886315	-3.65614	5e-05	0.000604383	yes
ENSG00000101331.14	ENSG00000101331.14	CCM2L	chr20:32010449-32032180	Ctrl	siHIF1A	OK	3.42055	7.14398	1.0625	2.87278	5e-05	0.000604383	yes
ENSG00000101346.10	ENSG00000101346.10	POFUT1	chr20:32207879-32238667	Ctrl	siHIF1A	OK	12.8321	18.9029	0.558843	1.69401	5e-05	0.000604383	yes
ENSG00000101347.8	ENSG00000101347.8	SAMHD1	chr20:36876120-36951843	Ctrl	siHIF1A	OK	14.577	43.2833	1.57012	5.29527	5e-05	0.000604383	yes
ENSG00000101400.5	ENSG00000101400.5	SNTA1	chr20:33407954-33443892	Ctrl	siHIF1A	OK	3.51762	1.56611	-1.16741	-3.07556	5e-05	0.000604383	yes
ENSG00000101439.7	ENSG00000101439.7	CST3	chr20:23626705-23638473	Ctrl	siHIF1A	OK	123.481	165.862	0.425689	1.74625	5e-05	0.000604383	yes
ENSG00000101474.10	ENSG00000101474.10	APMAP	chr20:24962924-24992979	Ctrl	siHIF1A	OK	64.0929	40.2208	-0.672225	-2.78608	5e-05	0.000604383	yes
ENSG00000101665.7	ENSG00000101665.7	SMAD7	chr18:48919852-48950711	Ctrl	siHIF1A	OK	13.3699	5.98741	-1.15898	-3.4175	5e-05	0.000604383	yes
ENSG00000101670.10	ENSG00000101670.10	LIPG	chr18:49560698-49599182	Ctrl	siHIF1A	OK	39.5431	10.3306	-1.93651	-5.97857	5e-05	0.000604383	yes
ENSG00000101752.10	ENSG00000101752.10	MIB1	chr18:21704956-21870957	Ctrl	siHIF1A	OK	18.3059	7.18369	-1.34951	-4.91521	5e-05	0.000604383	yes
ENSG00000101844.16	ENSG00000101844.16	ATG4A	chrX:108091667-108154671	Ctrl	siHIF1A	OK	9.67249	13.8496	0.517885	1.73976	5e-05	0.000604383	yes
ENSG00000101846.6	ENSG00000101846.6	STS	chrX:7219455-7354810	Ctrl	siHIF1A	OK	4.20987	2.52117	-0.73968	-2.69045	5e-05	0.000604383	yes
ENSG00000101911.11	ENSG00000101911.11	PRPS2	chrX:12791354-12824222	Ctrl	siHIF1A	OK	11.2628	6.82148	-0.723403	-2.39987	5e-05	0.000604383	yes
ENSG00000101974.13	ENSG00000101974.13	ATP11C	chrX:139726345-139945276	Ctrl	siHIF1A	OK	19.282	7.77955	-1.3095	-4.47673	5e-05	0.000604383	yes
ENSG00000102100.13	ENSG00000102100.13	SLC35A2	chrX:48903181-48911958	Ctrl	siHIF1A	OK	10.8011	15.9595	0.563236	1.84642	5e-05	0.000604383	yes
ENSG00000102144.12	ENSG00000102144.12	PGK1	chrX:78065187-78129296	Ctrl	siHIF1A	OK	184.335	106.857	-0.78665	-2.04113	5e-05	0.000604383	yes
ENSG00000102181.18	ENSG00000102181.18	CD99L2	chrX:150766336-150898816	Ctrl	siHIF1A	OK	12.0748	17.896	0.567637	2.07483	5e-05	0.000604383	yes
ENSG00000102390.9	ENSG00000102390.9	PBDC1	chrX:76172935-76178204	Ctrl	siHIF1A	OK	3.64443	6.49287	0.833164	2.52618	5e-05	0.000604383	yes
ENSG00000102466.14	ENSG00000102466.14	FGF14	chr13:101452592-102402457	Ctrl	siHIF1A	OK	1.00338	1.76537	0.815112	1.77269	5e-05	0.000604383	yes
ENSG00000102471.12	ENSG00000102471.12	NDFIP2	chr13:79477363-79556075	Ctrl	siHIF1A	OK	17.2633	10.0387	-0.782138	-2.63066	5e-05	0.000604383	yes
ENSG00000102575.9	ENSG00000102575.9	ACP5	chr19:11559373-11619135	Ctrl	siHIF1A	OK	1.07285	10.7774	3.32848	2.98772	5e-05	0.000604383	yes
ENSG00000102580.13	ENSG00000102580.13	DNAJC3	chr13:95677138-95794989	Ctrl	siHIF1A	OK	25.0239	34.4802	0.462464	1.91466	5e-05	0.000604383	yes
ENSG00000102755.9	ENSG00000102755.9	FLT1	chr13:28300343-28495128	Ctrl	siHIF1A	OK	69.7163	40.7311	-0.775364	-2.88673	5e-05	0.000604383	yes
ENSG00000102760.12	ENSG00000102760.12	RGCC	chr13:41457558-41470882	Ctrl	siHIF1A	OK	55.4945	92.1237	0.731226	2.95069	5e-05	0.000604383	yes
ENSG00000102802.8	ENSG00000102802.8	MEDAG	chr13:30881932-30977623	Ctrl	siHIF1A	OK	8.41776	12.4513	0.564792	1.98173	5e-05	0.000604383	yes
ENSG00000102870.5	ENSG00000102870.5	ZNF629	chr16:30778448-30787202	Ctrl	siHIF1A	OK	3.27523	4.74525	0.534889	2.00787	5e-05	0.000604383	yes
ENSG00000102882.10	ENSG00000102882.10	MAPK3	chr16:30114104-30123506	Ctrl	siHIF1A	OK	34.5156	50.0207	0.535276	1.79307	5e-05	0.000604383	yes
ENSG00000102996.4	ENSG00000102996.4	MMP15	chr16:58025565-58046901	Ctrl	siHIF1A	OK	2.27798	3.83248	0.75052	2.156	5e-05	0.000604383	yes
ENSG00000103034.13	ENSG00000103034.13	NDRG4	chr16:58462845-58513628	Ctrl	siHIF1A	OK	75.0519	118.674	0.661042	1.82705	5e-05	0.000604383	yes
ENSG00000103051.17	ENSG00000103051.17	COG4	chr16:70480567-70523565	Ctrl	siHIF1A	OK	14.9341	25.9403	0.796589	2.34667	5e-05	0.000604383	yes
ENSG00000103257.7	ENSG00000103257.7	SLC7A5	chr16:87830022-87869488	Ctrl	siHIF1A	OK	9.76729	5.07502	-0.944543	-3.25964	5e-05	0.000604383	yes
ENSG00000103472.8	ENSG00000103472.8	RRN3P2	chr16:29053731-29220031	Ctrl	siHIF1A	OK	2.50846	1.20935	-1.05257	-2.08819	5e-05	0.000604383	yes
ENSG00000103490.13	ENSG00000103490.13	PYCARD	chr16:31201484-31203452	Ctrl	siHIF1A	OK	21.2138	13.0733	-0.698373	-1.97902	5e-05	0.000604383	yes
ENSG00000103540.15	ENSG00000103540.15	CCP110	chr16:19523810-19553408	Ctrl	siHIF1A	OK	6.75401	4.11317	-0.715493	-1.59928	5e-05	0.000604383	yes
ENSG00000103647.11	ENSG00000103647.11	CORO2B	chr15:68578968-68727806	Ctrl	siHIF1A	OK	2.9688	1.87509	-0.662918	-2.04253	5e-05	0.000604383	yes
ENSG00000103876.10	ENSG00000103876.10	FAH	chr15:80152489-80186946	Ctrl	siHIF1A	OK	11.355	5.88969	-0.947064	-2.68277	5e-05	0.000604383	yes
ENSG00000104231.9	ENSG00000104231.9	ZFAND1	chr8:81701333-81759515	Ctrl	siHIF1A	OK	12.7309	22.3283	0.810545	2.3446	5e-05	0.000604383	yes
ENSG00000104368.16	ENSG00000104368.16	PLAT	chr8:42175232-42207724	Ctrl	siHIF1A	OK	42.8611	62.3515	0.540756	2.07178	5e-05	0.000604383	yes
ENSG00000104419.13	ENSG00000104419.13	NDRG1	chr8:133237170-133302022	Ctrl	siHIF1A	OK	93.7443	60.6856	-0.627377	-1.86908	5e-05	0.000604383	yes
ENSG00000104635.12	ENSG00000104635.12	SLC39A14	chr8:22367248-22434129	Ctrl	siHIF1A	OK	20.5826	31.1712	0.598788	2.13025	5e-05	0.000604383	yes
ENSG00000104679.9	ENSG00000104679.9	R3HCC1	chr8:23270119-23296279	Ctrl	siHIF1A	OK	6.37633	12.9284	1.01974	2.79979	5e-05	0.000604383	yes
ENSG00000104687.11	ENSG00000104687.11	GSR	chr8:30678060-30727926	Ctrl	siHIF1A	OK	30.4849	21.0719	-0.532775	-2.15702	5e-05	0.000604383	yes
ENSG00000104723.19	ENSG00000104723.19	TUSC3	chr8:15417214-15766649	Ctrl	siHIF1A	OK	3.08429	1.4998	-1.04017	-1.63575	5e-05	0.000604383	yes
ENSG00000104765.13	ENSG00000104765.13	BNIP3L	chr8:26379258-26514092	Ctrl	siHIF1A	OK	75.4886	46.3341	-0.704184	-2.34163	5e-05	0.000604383	yes
ENSG00000104856.12	ENSG00000104856.12	RELB	chr19:45001429-45038198	Ctrl	siHIF1A	OK	10.71	7.18326	-0.576248	-1.79369	5e-05	0.000604383	yes
ENSG00000104903.4	ENSG00000104903.4	LYL1	chr19:13099032-13103161	Ctrl	siHIF1A	OK	61.4568	36.1688	-0.764829	-3.04976	5e-05	0.000604383	yes
ENSG00000104964.13	ENSG00000104964.13	AES	chr19:3052909-3063107	Ctrl	siHIF1A	OK	56.4305	113.262	1.00512	3.33092	5e-05	0.000604383	yes
ENSG00000104998.3	ENSG00000104998.3	IL27RA	chr19:14031747-14053216	Ctrl	siHIF1A	OK	2.38118	1.07881	-1.14223	-3.09765	5e-05	0.000604383	yes
ENSG00000105058.10	ENSG00000105058.10	FAM32A	chr19:16185379-16192046	Ctrl	siHIF1A	OK	19.9366	43.6724	1.1313	4.41607	5e-05	0.000604383	yes
ENSG00000105193.7	ENSG00000105193.7	RPS16	chr19:39433206-39435948	Ctrl	siHIF1A	OK	314.298	216.333	-0.53888	-2.06102	5e-05	0.000604383	yes
ENSG00000105220.13	ENSG00000105220.13	GPI	chr19:34359479-34428273	Ctrl	siHIF1A	OK	98.0904	72.3731	-0.438658	-1.63303	5e-05	0.000604383	yes
ENSG00000105223.17	ENSG00000105223.17	PLD3	chr19:40319535-40390187	Ctrl	siHIF1A	OK	75.7131	114.7	0.599248	1.68561	5e-05	0.000604383	yes
ENSG00000105327.14	ENSG00000105327.14	BBC3	chr19:47220821-47232766	Ctrl	siHIF1A	OK	19.5614	29.4398	0.589755	2.15625	5e-05	0.000604383	yes
ENSG00000105379.8	ENSG00000105379.8	ETFB	chr19:51345168-51369003	Ctrl	siHIF1A	OK	15.3049	23.1981	0.600019	2.07242	5e-05	0.000604383	yes
ENSG00000105402.6	ENSG00000105402.6	NAPA	chr19:47484281-47515240	Ctrl	siHIF1A	OK	49.0534	72.7378	0.56835	1.94104	5e-05	0.000604383	yes
ENSG00000105472.11	ENSG00000105472.11	CLEC11A	chr19:50723328-50725718	Ctrl	siHIF1A	OK	9.18887	4.49326	-1.03212	-2.98578	5e-05	0.000604383	yes
ENSG00000105605.6	ENSG00000105605.6	CACNG7	chr19:53909334-53943941	Ctrl	siHIF1A	OK	0.992963	0.212223	-2.22616	-1.60465	5e-05	0.000604383	yes
ENSG00000105639.17	ENSG00000105639.17	JAK3	chr19:17824779-17848071	Ctrl	siHIF1A	OK	4.67103	1.78029	-1.39163	-3.43655	5e-05	0.000604383	yes
ENSG00000105650.20	ENSG00000105650.20	PDE4C	chr19:18204729-18255419	Ctrl	siHIF1A	OK	1.21238	0.340535	-1.83197	-1.02784	5e-05	0.000604383	yes
ENSG00000105825.10	ENSG00000105825.10	TFPI2	chr7:93591572-93911265	Ctrl	siHIF1A	OK	81.3782	129.256	0.667523	1.89259	5e-05	0.000604383	yes
ENSG00000105855.8	ENSG00000105855.8	ITGB8	chr7:20328298-20415754	Ctrl	siHIF1A	OK	6.85677	3.96206	-0.791279	-2.24251	5e-05	0.000604383	yes
ENSG00000105928.12	ENSG00000105928.12	DFNA5	chr7:24698352-24758113	Ctrl	siHIF1A	OK	16.2644	10.855	-0.583349	-1.77548	5e-05	0.000604383	yes
ENSG00000105967.14	ENSG00000105967.14	TFEC	chr7:115935147-116159896	Ctrl	siHIF1A	OK	18.1807	26.0558	0.519196	1.81385	5e-05	0.000604383	yes
ENSG00000105971.13	ENSG00000105971.13	CAV2	chr7:116209233-116508541	Ctrl	siHIF1A	OK	113.609	67.8676	-0.74328	-1.87497	5e-05	0.000604383	yes
ENSG00000105974.10	ENSG00000105974.10	CAV1	chr7:116524784-116561184	Ctrl	siHIF1A	OK	334.056	466.21	0.480889	1.64006	5e-05	0.000604383	yes
ENSG00000105976.13	ENSG00000105976.13	MET	chr7:116672389-116798386	Ctrl	siHIF1A	OK	30.2349	20.4675	-0.562881	-1.64286	5e-05	0.000604383	yes
ENSG00000105996.6	ENSG00000105996.6	HOXA2	chr7:27100353-27102811	Ctrl	siHIF1A	OK	1.98652	1.17747	-0.75455	-1.68557	5e-05	0.000604383	yes
ENSG00000106003.11	ENSG00000106003.11	LFNG	chr7:2512528-2529177	Ctrl	siHIF1A	OK	10.5145	4.8743	-1.10912	-3.37533	5e-05	0.000604383	yes
ENSG00000106268.14	ENSG00000106268.14	NUDT1	chr7:2242221-2251146	Ctrl	siHIF1A	OK	7.83857	4.96728	-0.658135	-1.62273	5e-05	0.000604383	yes
ENSG00000106404.12	ENSG00000106404.12	CLDN15	chr7:101232091-101238820	Ctrl	siHIF1A	OK	5.29661	8.6295	0.704208	2.03992	5e-05	0.000604383	yes
ENSG00000106460.17	ENSG00000106460.17	TMEM106B	chr7:12211240-12243367	Ctrl	siHIF1A	OK	17.9143	11.3828	-0.654257	-1.84451	5e-05	0.000604383	yes
ENSG00000106477.17	ENSG00000106477.17	CEP41	chr7:130393770-130442433	Ctrl	siHIF1A	OK	6.54532	10.2388	0.645508	1.551	5e-05	0.000604383	yes
ENSG00000106635.6	ENSG00000106635.6	BCL7B	chr7:73536355-73558002	Ctrl	siHIF1A	OK	9.70634	19.8522	1.0323	3.35366	5e-05	0.000604383	yes
ENSG00000106665.14	ENSG00000106665.14	CLIP2	chr7:74289474-74405943	Ctrl	siHIF1A	OK	9.15534	13.9033	0.602744	1.66503	5e-05	0.000604383	yes
ENSG00000106683.13	ENSG00000106683.13	LIMK1	chr7:74082932-74122525	Ctrl	siHIF1A	OK	27.7335	20.3476	-0.446771	-1.71494	5e-05	0.000604383	yes
ENSG00000106688.10	ENSG00000106688.10	SLC1A1	chr9:4490443-4666674	Ctrl	siHIF1A	OK	7.30146	4.3584	-0.744384	-2.23175	5e-05	0.000604383	yes
ENSG00000106772.16	ENSG00000106772.16	PRUNE2	chr9:76611375-76906087	Ctrl	siHIF1A	OK	11.2849	5.6437	-0.99968	-1.87789	5e-05	0.000604383	yes
ENSG00000106852.14	ENSG00000106852.14	LHX6	chr9:122202576-122229626	Ctrl	siHIF1A	OK	1.15031	5.57694	2.27745	3.75904	5e-05	0.000604383	yes
ENSG00000107201.8	ENSG00000107201.8	DDX58	chr9:32455704-32526324	Ctrl	siHIF1A	OK	14.4077	31.6374	1.13479	4.53383	5e-05	0.000604383	yes
ENSG00000107438.7	ENSG00000107438.7	PDLIM1	chr10:95237571-95291024	Ctrl	siHIF1A	OK	50.8257	38.8473	-0.387742	-1.50571	5e-05	0.000604383	yes
ENSG00000107443.14	ENSG00000107443.14	CCNJ	chr10:95711778-96090238	Ctrl	siHIF1A	OK	22.1204	12.1043	-0.86986	-2.2521	5e-05	0.000604383	yes
ENSG00000107485.14	ENSG00000107485.14	GATA3	chr10:8053603-8075198	Ctrl	siHIF1A	OK	1.75722	1.06501	-0.722433	-1.37488	5e-05	0.000604383	yes
ENSG00000107560.9	ENSG00000107560.9	RAB11FIP2	chr10:118004915-118210153	Ctrl	siHIF1A	OK	6.40104	3.22155	-0.990551	-2.15127	5e-05	0.000604383	yes
ENSG00000107679.13	ENSG00000107679.13	PLEKHA1	chr10:122374695-122442602	Ctrl	siHIF1A	OK	32.1626	23.2934	-0.465463	-1.56314	5e-05	0.000604383	yes
ENSG00000107731.11	ENSG00000107731.11	UNC5B	chr10:71212569-71302864	Ctrl	siHIF1A	OK	2.75072	0.583172	-2.23782	-6.44616	5e-05	0.000604383	yes
ENSG00000107796.11	ENSG00000107796.11	ACTA2	chr10:88879733-89015785	Ctrl	siHIF1A	OK	6.32112	13.4517	1.08954	2.3845	5e-05	0.000604383	yes
ENSG00000107863.15	ENSG00000107863.15	ARHGAP21	chr10:24583608-24723668	Ctrl	siHIF1A	OK	18.3259	33.0701	0.851643	1.67263	5e-05	0.000604383	yes
ENSG00000107960.9	ENSG00000107960.9	OBFC1	chr10:103882541-103918205	Ctrl	siHIF1A	OK	14.3199	8.76632	-0.707982	-2.50518	5e-05	0.000604383	yes
ENSG00000108100.16	ENSG00000108100.16	CCNY	chr10:35247024-35572669	Ctrl	siHIF1A	OK	82.6862	46.2665	-0.83768	-2.49981	5e-05	0.000604383	yes
ENSG00000108175.15	ENSG00000108175.15	ZMIZ1	chr10:79069034-79316528	Ctrl	siHIF1A	OK	8.47865	5.11567	-0.728913	-1.63547	5e-05	0.000604383	yes
ENSG00000108179.12	ENSG00000108179.12	PPIF	chr10:79347468-79355337	Ctrl	siHIF1A	OK	18.3103	11.4331	-0.679432	-2.18621	5e-05	0.000604383	yes
ENSG00000108448.19	ENSG00000108448.19	TRIM16L	chr17:18697997-18736118	Ctrl	siHIF1A	OK	19.5192	7.03565	-1.47214	-4.04099	5e-05	0.000604383	yes
ENSG00000108602.16	ENSG00000108602.16	ALDH3A1	chr17:19737681-19748943	Ctrl	siHIF1A	OK	0.248861	0.59997	1.26955	0.600992	5e-05	0.000604383	yes
ENSG00000108639.6	ENSG00000108639.6	SYNGR2	chr17:78168557-78173527	Ctrl	siHIF1A	OK	76.716	105.333	0.457355	1.79206	5e-05	0.000604383	yes
ENSG00000108679.11	ENSG00000108679.11	LGALS3BP	chr17:78971237-78980109	Ctrl	siHIF1A	OK	8.14308	11.6534	0.51711	1.61732	5e-05	0.000604383	yes
ENSG00000108691.8	ENSG00000108691.8	CCL2	chr17:34255217-34257203	Ctrl	siHIF1A	OK	455.882	230.253	-0.985438	-3.92252	5e-05	0.000604383	yes
ENSG00000108771.11	ENSG00000108771.11	DHX58	chr17:42101403-42112733	Ctrl	siHIF1A	OK	4.36028	10.341	1.24588	3.26532	5e-05	0.000604383	yes
ENSG00000108797.10	ENSG00000108797.10	CNTNAP1	chr17:42678888-42699814	Ctrl	siHIF1A	OK	15.9337	9.6221	-0.72766	-2.061	5e-05	0.000604383	yes
ENSG00000108828.14	ENSG00000108828.14	VAT1	chr17:43014604-43025123	Ctrl	siHIF1A	OK	138.184	199.132	0.527137	1.9315	5e-05	0.000604383	yes
ENSG00000108861.7	ENSG00000108861.7	DUSP3	chr17:43766120-43778988	Ctrl	siHIF1A	OK	31.6455	50.2523	0.667187	2.42265	5e-05	0.000604383	yes
ENSG00000108960.6	ENSG00000108960.6	MMD	chr17:55392612-55421992	Ctrl	siHIF1A	OK	9.32831	3.71552	-1.32805	-4.05288	5e-05	0.000604383	yes
ENSG00000109193.9	ENSG00000109193.9	SULT1E1	chr4:69791871-69860152	Ctrl	siHIF1A	OK	11.7896	6.86638	-0.779888	-2.36073	5e-05	0.000604383	yes
ENSG00000109270.11	ENSG00000109270.11	LAMTOR3	chr4:99878335-99894490	Ctrl	siHIF1A	OK	30.72	19.312	-0.669678	-2.18314	5e-05	0.000604383	yes
ENSG00000109667.10	ENSG00000109667.10	SLC2A9	chr4:9771152-10054936	Ctrl	siHIF1A	OK	1.50082	0.36448	-2.04184	-1.67988	5e-05	0.000604383	yes
ENSG00000109944.9	ENSG00000109944.9	C11orf63	chr11:122882527-122959798	Ctrl	siHIF1A	OK	2.04528	1.09587	-0.900226	-2.12491	5e-05	0.000604383	yes
ENSG00000110002.14	ENSG00000110002.14	VWA5A	chr11:124115361-124147721	Ctrl	siHIF1A	OK	7.18247	4.54352	-0.660669	-1.97747	5e-05	0.000604383	yes
ENSG00000110031.11	ENSG00000110031.11	LPXN	chr11:58526870-58578220	Ctrl	siHIF1A	OK	6.54568	4.46269	-0.552631	-1.66629	5e-05	0.000604383	yes
ENSG00000110080.17	ENSG00000110080.17	ST3GAL4	chr11:126355639-127006058	Ctrl	siHIF1A	OK	18.6659	13.774	-0.438456	-1.54802	5e-05	0.000604383	yes
ENSG00000110092.3	ENSG00000110092.3	CCND1	chr11:69641086-69675416	Ctrl	siHIF1A	OK	166.945	75.4693	-1.14541	-3.17492	5e-05	0.000604383	yes
ENSG00000110172.10	ENSG00000110172.10	CHORDC1	chr11:90201159-90226538	Ctrl	siHIF1A	OK	25.068	17.0574	-0.555451	-1.78309	5e-05	0.000604383	yes
ENSG00000110318.12	ENSG00000110318.12	KIAA1377	chr11:101890673-102001058	Ctrl	siHIF1A	OK	1.46621	0.712133	-1.04187	-2.40228	5e-05	0.000604383	yes
ENSG00000110422.10	ENSG00000110422.10	HIPK3	chr11:33256671-33357023	Ctrl	siHIF1A	OK	23.3427	15.9185	-0.552266	-1.96498	5e-05	0.000604383	yes
ENSG00000110455.12	ENSG00000110455.12	ACCS	chr11:44065924-44084222	Ctrl	siHIF1A	OK	2.0998	4.00144	0.930263	1.72227	5e-05	0.000604383	yes
ENSG00000110660.13	ENSG00000110660.13	SLC35F2	chr11:107790990-107928293	Ctrl	siHIF1A	OK	27.2481	19.7211	-0.466418	-1.69706	5e-05	0.000604383	yes
ENSG00000110848.7	ENSG00000110848.7	CD69	chr12:9752485-9760901	Ctrl	siHIF1A	OK	1.1467	0.130109	-3.13969	-2.08088	5e-05	0.000604383	yes
ENSG00000110881.10	ENSG00000110881.10	ASIC1	chr12:50057547-50083611	Ctrl	siHIF1A	OK	0.481863	0.129972	-1.89042	-0.817502	5e-05	0.000604383	yes
ENSG00000110917.6	ENSG00000110917.6	MLEC	chr12:120686868-120701864	Ctrl	siHIF1A	OK	19.5178	31.0259	0.668686	1.78325	5e-05	0.000604383	yes
ENSG00000110987.7	ENSG00000110987.7	BCL7A	chr12:122007433-122062044	Ctrl	siHIF1A	OK	2.41528	3.74868	0.634192	1.85718	5e-05	0.000604383	yes
ENSG00000111057.9	ENSG00000111057.9	KRT18	chr12:52897186-52952901	Ctrl	siHIF1A	OK	58.3374	81.5179	0.482695	1.84506	5e-05	0.000604383	yes
ENSG00000111110.10	ENSG00000111110.10	PPM1H	chr12:62643981-62935037	Ctrl	siHIF1A	OK	2.04344	1.05672	-0.951399	-1.61436	5e-05	0.000604383	yes
ENSG00000111199.9	ENSG00000111199.9	TRPV4	chr12:109783084-109833436	Ctrl	siHIF1A	OK	4.34368	1.93509	-1.16652	-2.81198	5e-05	0.000604383	yes
ENSG00000111252.9	ENSG00000111252.9	SH2B3	chr12:111405947-111451623	Ctrl	siHIF1A	OK	64.9143	32.1253	-1.01483	-3.88609	5e-05	0.000604383	yes
ENSG00000111276.9	ENSG00000111276.9	CDKN1B	chr12:12715057-12722371	Ctrl	siHIF1A	OK	23.8892	14.8091	-0.689879	-2.6362	5e-05	0.000604383	yes
ENSG00000111331.11	ENSG00000111331.11	OAS3	chr12:112906776-113017751	Ctrl	siHIF1A	OK	10.2261	29.914	1.54856	1.93809	5e-05	0.000604383	yes
ENSG00000111335.11	ENSG00000111335.11	OAS2	chr12:112906776-113017751	Ctrl	siHIF1A	OK	15.1332	50.5068	1.73876	2.88636	5e-05	0.000604383	yes
ENSG00000111341.8	ENSG00000111341.8	MGP	chr12:14803571-14906586	Ctrl	siHIF1A	OK	79.263	236.52	1.57724	4.05153	5e-05	0.000604383	yes
ENSG00000111640.13	ENSG00000111640.13	GAPDH	chr12:6533926-6538374	Ctrl	siHIF1A	OK	1814.08	1099.55	-0.722323	-1.87122	5e-05	0.000604383	yes
ENSG00000111647.11	ENSG00000111647.11	UHRF1BP1L	chr12:100028454-100142848	Ctrl	siHIF1A	OK	7.54229	4.74048	-0.669968	-1.64905	5e-05	0.000604383	yes
ENSG00000111669.13	ENSG00000111669.13	TPI1	chr12:6867118-6923698	Ctrl	siHIF1A	OK	524.236	214.246	-1.29095	-4.61608	5e-05	0.000604383	yes
ENSG00000111674.7	ENSG00000111674.7	ENO2	chr12:6867118-6923698	Ctrl	siHIF1A	OK	33.0584	7.71044	-2.10013	-1.69459	5e-05	0.000604383	yes
ENSG00000111676.13	ENSG00000111676.13	ATN1	chr12:6924462-6942321	Ctrl	siHIF1A	OK	10.1881	3.54967	-1.52113	-2.86947	5e-05	0.000604383	yes
ENSG00000111678.9	ENSG00000111678.9	C12orf57	chr12:6942977-6946003	Ctrl	siHIF1A	OK	89.3915	35.7176	-1.3235	-4.58797	5e-05	0.000604383	yes
ENSG00000111716.11	ENSG00000111716.11	LDHB	chr12:21635341-21775581	Ctrl	siHIF1A	OK	356.451	253.987	-0.488951	-1.91373	5e-05	0.000604383	yes
ENSG00000111801.14	ENSG00000111801.14	BTN3A3	chr6:26440471-26453415	Ctrl	siHIF1A	OK	7.01317	14.84	1.08135	2.80481	5e-05	0.000604383	yes
ENSG00000111906.16	ENSG00000111906.16	HDDC2	chr6:125119048-125302078	Ctrl	siHIF1A	OK	10.116	4.39718	-1.20199	-3.12181	5e-05	0.000604383	yes
ENSG00000111911.6	ENSG00000111911.6	HINT3	chr6:125956780-125980244	Ctrl	siHIF1A	OK	10.5405	6.35411	-0.730187	-2.68057	5e-05	0.000604383	yes
ENSG00000112183.13	ENSG00000112183.13	RBM24	chr6:17281345-17293875	Ctrl	siHIF1A	OK	3.65702	0.873621	-2.06559	-3.96272	5e-05	0.000604383	yes
ENSG00000112186.10	ENSG00000112186.10	CAP2	chr6:17393215-17557792	Ctrl	siHIF1A	OK	5.56037	3.96029	-0.489576	-1.62718	5e-05	0.000604383	yes
ENSG00000112290.11	ENSG00000112290.11	WASF1	chr6:110099818-110180004	Ctrl	siHIF1A	OK	7.06852	4.9449	-0.515465	-1.56789	5e-05	0.000604383	yes
ENSG00000112297.13	ENSG00000112297.13	AIM1	chr6:106511854-106570451	Ctrl	siHIF1A	OK	5.50737	8.71031	0.66136	2.26737	5e-05	0.000604383	yes
ENSG00000112343.10	ENSG00000112343.10	TRIM38	chr6:25962801-26001775	Ctrl	siHIF1A	OK	3.88781	5.74727	0.563917	2.18984	5e-05	0.000604383	yes
ENSG00000112378.11	ENSG00000112378.11	PERP	chr6:138088504-138107511	Ctrl	siHIF1A	OK	12.2601	29.3504	1.25941	5.08419	5e-05	0.000604383	yes
ENSG00000112379.8	ENSG00000112379.8	KIAA1244	chr6:138161920-138344663	Ctrl	siHIF1A	OK	1.5557	0.916947	-0.762653	-2.69501	5e-05	0.000604383	yes
ENSG00000112419.13	ENSG00000112419.13	PHACTR2	chr6:143536844-143938471	Ctrl	siHIF1A	OK	22.4008	45.2598	1.01468	2.18814	5e-05	0.000604383	yes
ENSG00000112473.15	ENSG00000112473.15	SLC39A7	chr6:33193587-33204439	Ctrl	siHIF1A	OK	29.2685	41.5363	0.505024	1.77806	5e-05	0.000604383	yes
ENSG00000112559.12	ENSG00000112559.12	MDFI	chr6:41636881-41654246	Ctrl	siHIF1A	OK	32.2931	11.8867	-1.44187	-4.97827	5e-05	0.000604383	yes
ENSG00000112562.17	ENSG00000112562.17	SMOC2	chr6:168441150-168673445	Ctrl	siHIF1A	OK	5.27641	9.74997	0.885842	2.92816	5e-05	0.000604383	yes
ENSG00000112576.11	ENSG00000112576.11	CCND3	chr6:41934932-42050357	Ctrl	siHIF1A	OK	42.1812	64.7686	0.618695	2.28585	5e-05	0.000604383	yes
ENSG00000112715.19	ENSG00000112715.19	VEGFA	chr6:43770183-43786487	Ctrl	siHIF1A	OK	40.083	14.0522	-1.51219	-3.75334	5e-05	0.000604383	yes
ENSG00000112742.8	ENSG00000112742.8	TTK	chr6:80003886-80042527	Ctrl	siHIF1A	OK	3.21263	1.93889	-0.728522	-1.28477	5e-05	0.000604383	yes
ENSG00000112893.8	ENSG00000112893.8	MAN2A1	chr5:109689365-109869625	Ctrl	siHIF1A	OK	47.7303	27.9511	-0.772001	-3.00689	5e-05	0.000604383	yes
ENSG00000112981.4	ENSG00000112981.4	NME5	chr5:138115171-138139443	Ctrl	siHIF1A	OK	0.631746	1.64388	1.37969	1.46977	5e-05	0.000604383	yes
ENSG00000113083.11	ENSG00000113083.11	LOX	chr5:121961960-122078285	Ctrl	siHIF1A	OK	34.0075	15.0214	-1.17883	-3.42761	5e-05	0.000604383	yes
ENSG00000113273.14	ENSG00000113273.14	ARSB	chr5:78777208-78986087	Ctrl	siHIF1A	OK	14.1564	6.9068	-1.03536	-3.66696	5e-05	0.000604383	yes
ENSG00000113369.7	ENSG00000113369.7	ARRDC3	chr5:91368723-91439085	Ctrl	siHIF1A	OK	93.5123	47.2636	-0.984427	-2.71579	5e-05	0.000604383	yes
ENSG00000113532.11	ENSG00000113532.11	ST8SIA4	chr5:100806934-100903266	Ctrl	siHIF1A	OK	7.79238	4.17881	-0.898971	-2.68195	5e-05	0.000604383	yes
ENSG00000113555.5	ENSG00000113555.5	PCDH12	chr5:141943584-141990291	Ctrl	siHIF1A	OK	33.4083	13.6918	-1.2869	-1.93682	5e-05	0.000604383	yes
ENSG00000113638.11	ENSG00000113638.11	TTC33	chr5:40714474-40755975	Ctrl	siHIF1A	OK	3.79538	6.40968	0.756008	2.44311	5e-05	0.000604383	yes
ENSG00000113657.11	ENSG00000113657.11	DPYSL3	chr5:147390810-147510056	Ctrl	siHIF1A	OK	55.1776	25.9047	-1.09087	-3.51626	5e-05	0.000604383	yes
ENSG00000113739.9	ENSG00000113739.9	STC2	chr5:173314712-173329503	Ctrl	siHIF1A	OK	37.7896	13.9101	-1.44185	-3.12309	5e-05	0.000604383	yes
ENSG00000113758.12	ENSG00000113758.12	DBN1	chr5:177456607-177474401	Ctrl	siHIF1A	OK	68.4802	103.047	0.589546	1.8656	5e-05	0.000604383	yes
ENSG00000114023.14	ENSG00000114023.14	FAM162A	chr3:122384175-122416051	Ctrl	siHIF1A	OK	21.1362	10.5371	-1.00423	-2.55677	5e-05	0.000604383	yes
ENSG00000114120.10	ENSG00000114120.10	SLC25A36	chr3:140941829-140979933	Ctrl	siHIF1A	OK	26.8068	19.044	-0.49326	-1.48869	5e-05	0.000604383	yes
ENSG00000114268.10	ENSG00000114268.10	PFKFB4	chr3:48517683-48563773	Ctrl	siHIF1A	OK	2.70193	1.03089	-1.3901	-2.16982	5e-05	0.000604383	yes
ENSG00000114315.3	ENSG00000114315.3	HES1	chr3:194136144-194138732	Ctrl	siHIF1A	OK	53.4248	36.7426	-0.540054	-2.15685	5e-05	0.000604383	yes
ENSG00000114353.15	ENSG00000114353.15	GNAI2	chr3:50226291-50259355	Ctrl	siHIF1A	OK	198.697	322.608	0.699212	2.5314	5e-05	0.000604383	yes
ENSG00000114450.8	ENSG00000114450.8	GNB4	chr3:179396088-179451590	Ctrl	siHIF1A	OK	31.1622	18.9738	-0.715787	-1.86282	5e-05	0.000604383	yes
ENSG00000114480.11	ENSG00000114480.11	GBE1	chr3:81489698-81762161	Ctrl	siHIF1A	OK	100.333	68.6223	-0.548048	-2.01655	5e-05	0.000604383	yes
ENSG00000114573.8	ENSG00000114573.8	ATP6V1A	chr3:113746871-113812056	Ctrl	siHIF1A	OK	44.1395	33.4544	-0.399877	-1.44649	5e-05	0.000604383	yes
ENSG00000114631.10	ENSG00000114631.10	PODXL2	chr3:127629180-127672809	Ctrl	siHIF1A	OK	0.946759	1.78871	0.917853	2.20024	5e-05	0.000604383	yes
ENSG00000114686.7	ENSG00000114686.7	MRPL3	chr3:131462211-131502983	Ctrl	siHIF1A	OK	26.238	16.7636	-0.646325	-2.26315	5e-05	0.000604383	yes
ENSG00000114698.13	ENSG00000114698.13	PLSCR4	chr3:146192338-146251179	Ctrl	siHIF1A	OK	116.55	68.1146	-0.774915	-2.66241	5e-05	0.000604383	yes
ENSG00000114933.14	ENSG00000114933.14	INO80D	chr2:205989584-206086564	Ctrl	siHIF1A	OK	4.42759	3.15274	-0.489913	-1.65753	5e-05	0.000604383	yes
ENSG00000114942.12	ENSG00000114942.12	EEF1B2	chr2:206114816-206162928	Ctrl	siHIF1A	OK	300.516	212.079	-0.502839	-1.68128	5e-05	0.000604383	yes
ENSG00000115008.5	ENSG00000115008.5	IL1A	chr2:112773914-112784590	Ctrl	siHIF1A	OK	7.43461	0.596603	-3.63941	-8.39185	5e-05	0.000604383	yes
ENSG00000115073.7	ENSG00000115073.7	ACTR1B	chr2:97655962-97664107	Ctrl	siHIF1A	OK	20.0681	29.1212	0.537164	1.95556	5e-05	0.000604383	yes
ENSG00000115107.18	ENSG00000115107.18	STEAP3	chr2:119223830-119265652	Ctrl	siHIF1A	OK	8.50223	4.68147	-0.86088	-3.01095	5e-05	0.000604383	yes
ENSG00000115267.5	ENSG00000115267.5	IFIH1	chr2:162267078-162318703	Ctrl	siHIF1A	OK	7.36427	17.2103	1.22466	3.64985	5e-05	0.000604383	yes
ENSG00000115457.8	ENSG00000115457.8	IGFBP2	chr2:216632827-216664436	Ctrl	siHIF1A	OK	4.07294	2.49878	-0.704845	-1.67048	5e-05	0.000604383	yes
ENSG00000115525.15	ENSG00000115525.15	ST3GAL5	chr2:85839143-85889014	Ctrl	siHIF1A	OK	22.0336	14.216	-0.63219	-1.8994	5e-05	0.000604383	yes
ENSG00000115526.9	ENSG00000115526.9	CHST10	chr2:100391859-100417656	Ctrl	siHIF1A	OK	6.08535	4.34275	-0.48673	-1.35647	5e-05	0.000604383	yes
ENSG00000115539.12	ENSG00000115539.12	PDCL3	chr2:100562689-100576735	Ctrl	siHIF1A	OK	7.20548	10.695	0.569764	1.81233	5e-05	0.000604383	yes
ENSG00000115556.12	ENSG00000115556.12	PLCD4	chr2:218607764-218637184	Ctrl	siHIF1A	OK	2.5598	0.875418	-1.54799	-1.91697	5e-05	0.000604383	yes
ENSG00000115652.13	ENSG00000115652.13	UXS1	chr2:106093302-106194339	Ctrl	siHIF1A	OK	17.2428	10.8636	-0.666488	-2.17999	5e-05	0.000604383	yes
ENSG00000115750.15	ENSG00000115750.15	TAF1B	chr2:9843353-9934416	Ctrl	siHIF1A	OK	11.1862	6.86206	-0.705013	-1.64806	5e-05	0.000604383	yes
ENSG00000115762.15	ENSG00000115762.15	PLEKHB2	chr2:131104846-131353709	Ctrl	siHIF1A	OK	37.8819	51.4256	0.440978	1.63169	5e-05	0.000604383	yes
ENSG00000115866.9	ENSG00000115866.9	DARS	chr2:135906676-136022593	Ctrl	siHIF1A	OK	33.9278	25.6709	-0.402331	-1.47349	5e-05	0.000604383	yes
ENSG00000115884.9	ENSG00000115884.9	SDC1	chr2:20200796-20225433	Ctrl	siHIF1A	OK	1.1142	2.77338	1.31564	2.22988	5e-05	0.000604383	yes
ENSG00000115993.10	ENSG00000115993.10	TRAK2	chr2:201377206-201480846	Ctrl	siHIF1A	OK	17.2492	8.39552	-1.03884	-3.09551	5e-05	0.000604383	yes
ENSG00000116157.5	ENSG00000116157.5	GPX7	chr1:52602371-52609051	Ctrl	siHIF1A	OK	9.69819	6.18128	-0.649809	-2.05075	5e-05	0.000604383	yes
ENSG00000116199.10	ENSG00000116199.10	FAM20B	chr1:179025803-179076562	Ctrl	siHIF1A	OK	11.1578	5.71041	-0.966383	-3.18457	5e-05	0.000604383	yes
ENSG00000116285.11	ENSG00000116285.11	ERRFI1	chr1:8004403-8026308	Ctrl	siHIF1A	OK	39.3284	18.7235	-1.07072	-3.89562	5e-05	0.000604383	yes
ENSG00000116288.11	ENSG00000116288.11	PARK7	chr1:7954290-7985505	Ctrl	siHIF1A	OK	101.812	66.6742	-0.610709	-2.4307	5e-05	0.000604383	yes
ENSG00000116478.10	ENSG00000116478.10	HDAC1	chr1:32292085-32333635	Ctrl	siHIF1A	OK	53.1759	83.2537	0.646742	2.24196	5e-05	0.000604383	yes
ENSG00000116711.9	ENSG00000116711.9	PLA2G4A	chr1:186828952-186988981	Ctrl	siHIF1A	OK	8.69931	3.95815	-1.13607	-4.01422	5e-05	0.000604383	yes
ENSG00000117000.8	ENSG00000117000.8	RLF	chr1:40161372-40240921	Ctrl	siHIF1A	OK	9.34373	5.66248	-0.722565	-2.89245	5e-05	0.000604383	yes
ENSG00000117222.12	ENSG00000117222.12	RBBP5	chr1:205086141-205122015	Ctrl	siHIF1A	OK	4.57444	6.90549	0.594149	2.00265	5e-05	0.000604383	yes
ENSG00000117228.9	ENSG00000117228.9	GBP1	chr1:89052318-89065360	Ctrl	siHIF1A	OK	9.43225	14.5085	0.621226	1.78182	5e-05	0.000604383	yes
ENSG00000117298.13	ENSG00000117298.13	ECE1	chr1:21217246-21345504	Ctrl	siHIF1A	OK	122.299	291.097	1.25109	3.59219	5e-05	0.000604383	yes
ENSG00000117308.13	ENSG00000117308.13	GALE	chr1:23795598-23800804	Ctrl	siHIF1A	OK	35.2185	25.267	-0.479079	-1.71037	5e-05	0.000604383	yes
ENSG00000117394.18	ENSG00000117394.18	SLC2A1	chr1:42925374-42983358	Ctrl	siHIF1A	OK	69.3195	35.3093	-0.973214	-2.96673	5e-05	0.000604383	yes
ENSG00000117399.12	ENSG00000117399.12	CDC20	chr1:43358954-43363203	Ctrl	siHIF1A	OK	16.1403	7.59029	-1.08844	-3.56953	5e-05	0.000604383	yes
ENSG00000117461.13	ENSG00000117461.13	PIK3R3	chr1:46040139-46185958	Ctrl	siHIF1A	OK	7.52095	3.18184	-1.24105	-3.87257	5e-05	0.000604383	yes
ENSG00000117479.11	ENSG00000117479.11	SLC19A2	chr1:169463908-169486003	Ctrl	siHIF1A	OK	4.19829	2.59355	-0.69487	-2.17429	5e-05	0.000604383	yes
ENSG00000117500.11	ENSG00000117500.11	TMED5	chr1:93149741-93369498	Ctrl	siHIF1A	OK	36.8354	21.0416	-0.80785	-1.8332	5e-05	0.000604383	yes
ENSG00000117595.9	ENSG00000117595.9	IRF6	chr1:209785622-209806175	Ctrl	siHIF1A	OK	12.5249	1.09397	-3.51715	-7.84851	5e-05	0.000604383	yes
ENSG00000117597.16	ENSG00000117597.16	DIEXF	chr1:209828006-209857565	Ctrl	siHIF1A	OK	6.38116	4.32075	-0.562536	-1.94681	5e-05	0.000604383	yes
ENSG00000117643.13	ENSG00000117643.13	MAN1C1	chr1:25617467-25786207	Ctrl	siHIF1A	OK	1.04718	2.82586	1.43218	3.1663	5e-05	0.000604383	yes
ENSG00000117650.11	ENSG00000117650.11	NEK2	chr1:211658656-211675630	Ctrl	siHIF1A	OK	2.74047	1.32107	-1.05272	-2.43257	5e-05	0.000604383	yes
ENSG00000117713.16	ENSG00000117713.16	ARID1A	chr1:26696032-26782104	Ctrl	siHIF1A	OK	5.91317	3.99178	-0.566897	-1.55412	5e-05	0.000604383	yes
ENSG00000117751.16	ENSG00000117751.16	PPP1R8	chr1:27830777-27851676	Ctrl	siHIF1A	OK	11.0567	16.3733	0.566423	1.97017	5e-05	0.000604383	yes
ENSG00000117899.9	ENSG00000117899.9	MESDC2	chr15:80779342-80989878	Ctrl	siHIF1A	OK	7.28809	16.012	1.13554	4.05964	5e-05	0.000604383	yes
ENSG00000118193.10	ENSG00000118193.10	KIF14	chr1:200551496-200620734	Ctrl	siHIF1A	OK	1.83312	0.872659	-1.07081	-3.44574	5e-05	0.000604383	yes
ENSG00000118217.5	ENSG00000118217.5	ATF6	chr1:161766293-161964070	Ctrl	siHIF1A	OK	18.2513	28.5853	0.647272	2.46418	5e-05	0.000604383	yes
ENSG00000118402.5	ENSG00000118402.5	ELOVL4	chr6:79914811-79947580	Ctrl	siHIF1A	OK	1.42677	0.751823	-0.924292	-2.09061	5e-05	0.000604383	yes
ENSG00000118418.13	ENSG00000118418.13	HMGN3	chr6:79201244-79236797	Ctrl	siHIF1A	OK	41.8348	30.4265	-0.459377	-1.68397	5e-05	0.000604383	yes
ENSG00000118482.10	ENSG00000118482.10	PHF3	chr6:63635819-65707225	Ctrl	siHIF1A	OK	11.5515	16.568	0.520322	1.77154	5e-05	0.000604383	yes
ENSG00000118503.13	ENSG00000118503.13	TNFAIP3	chr6:137823672-137883312	Ctrl	siHIF1A	OK	6.18125	3.07051	-1.00942	-1.93276	5e-05	0.000604383	yes
ENSG00000118508.4	ENSG00000118508.4	RAB32	chr6:146543692-146554965	Ctrl	siHIF1A	OK	61.4896	46.1517	-0.413958	-1.67471	5e-05	0.000604383	yes
ENSG00000118515.10	ENSG00000118515.10	SGK1	chr6:134169245-134318112	Ctrl	siHIF1A	OK	51.6701	76.8073	0.571913	2.07626	5e-05	0.000604383	yes
ENSG00000118596.10	ENSG00000118596.10	SLC16A7	chr12:59596066-59789855	Ctrl	siHIF1A	OK	4.39094	1.6312	-1.42859	-1.80916	5e-05	0.000604383	yes
ENSG00000118777.9	ENSG00000118777.9	ABCG2	chr4:88090263-88231322	Ctrl	siHIF1A	OK	1.40028	4.3107	1.62221	1.85773	5e-05	0.000604383	yes
ENSG00000118816.8	ENSG00000118816.8	CCNI	chr4:77047157-77076005	Ctrl	siHIF1A	OK	88.581	59.5809	-0.572148	-2.11129	5e-05	0.000604383	yes
ENSG00000118946.10	ENSG00000118946.10	PCDH17	chr13:57631809-57729311	Ctrl	siHIF1A	OK	1.27496	0.540391	-1.23837	-2.51901	5e-05	0.000604383	yes
ENSG00000119280.15	ENSG00000119280.15	C1orf198	chr1:230837118-230869589	Ctrl	siHIF1A	OK	9.58732	7.12777	-0.427677	-1.49648	5e-05	0.000604383	yes
ENSG00000119392.13	ENSG00000119392.13	GLE1	chr9:128504699-128552410	Ctrl	siHIF1A	OK	4.46675	7.58323	0.763586	2.76511	5e-05	0.000604383	yes
ENSG00000119421.6	ENSG00000119421.6	NDUFA8	chr9:122144057-122159819	Ctrl	siHIF1A	OK	26.6508	45.5978	0.774787	2.94046	5e-05	0.000604383	yes
ENSG00000119669.4	ENSG00000119669.4	IRF2BPL	chr14:77024542-77031572	Ctrl	siHIF1A	OK	6.59046	4.39723	-0.583784	-1.90996	5e-05	0.000604383	yes
ENSG00000119900.7	ENSG00000119900.7	OGFRL1	chr6:71221456-71420769	Ctrl	siHIF1A	OK	6.99838	11.8017	0.753897	1.92749	5e-05	0.000604383	yes
ENSG00000119917.12	ENSG00000119917.12	IFIT3	chr10:89213568-89414557	Ctrl	siHIF1A	OK	4.65633	21.4156	2.2014	3.15987	5e-05	0.000604383	yes
ENSG00000119922.8	ENSG00000119922.8	IFIT2	chr10:89213568-89414557	Ctrl	siHIF1A	OK	1.02266	4.78219	2.22535	1.9636	5e-05	0.000604383	yes
ENSG00000119927.12	ENSG00000119927.12	GPAM	chr10:112149863-112215377	Ctrl	siHIF1A	OK	2.54577	3.74472	0.556756	1.5369	5e-05	0.000604383	yes
ENSG00000119938.8	ENSG00000119938.8	PPP1R3C	chr10:91628441-91633054	Ctrl	siHIF1A	OK	4.10806	2.02813	-1.01831	-2.9888	5e-05	0.000604383	yes
ENSG00000119950.19	ENSG00000119950.19	MXI1	chr10:110207604-110287365	Ctrl	siHIF1A	OK	8.6993	4.64325	-0.905763	-3.06768	5e-05	0.000604383	yes
ENSG00000120156.19	ENSG00000120156.19	TEK	chr9:27109140-27230175	Ctrl	siHIF1A	OK	29.5845	47.0786	0.670231	2.75024	5e-05	0.000604383	yes
ENSG00000120337.8	ENSG00000120337.8	TNFSF18	chr1:172775904-173064015	Ctrl	siHIF1A	OK	9.65137	39.8098	2.04432	7.60869	5e-05	0.000604383	yes
ENSG00000120658.11	ENSG00000120658.11	ENOX1	chr13:43213517-43786908	Ctrl	siHIF1A	OK	1.1214	0.241648	-2.21433	-1.87476	5e-05	0.000604383	yes
ENSG00000120708.15	ENSG00000120708.15	TGFBI	chr5:136028894-136063818	Ctrl	siHIF1A	OK	9.80781	2.65297	-1.88632	-4.69846	5e-05	0.000604383	yes
ENSG00000120820.11	ENSG00000120820.11	GLT8D2	chr12:103988983-104064183	Ctrl	siHIF1A	OK	0.680811	1.30067	0.933929	1.34343	5e-05	0.000604383	yes
ENSG00000120889.11	ENSG00000120889.11	TNFRSF10B	chr8:22687658-23083619	Ctrl	siHIF1A	OK	157.748	100.673	-0.647948	-1.96628	5e-05	0.000604383	yes
ENSG00000120992.16	ENSG00000120992.16	LYPLA1	chr8:54046366-54102017	Ctrl	siHIF1A	OK	97.1794	54.0173	-0.847228	-2.81257	5e-05	0.000604383	yes
ENSG00000121067.16	ENSG00000121067.16	SPOP	chr17:49598883-49678234	Ctrl	siHIF1A	OK	23.3129	31.8799	0.451519	1.43196	5e-05	0.000604383	yes
ENSG00000121653.10	ENSG00000121653.10	MAPK8IP1	chr11:45885650-45906465	Ctrl	siHIF1A	OK	2.07526	0.985605	-1.07421	-1.8345	5e-05	0.000604383	yes
ENSG00000121753.11	ENSG00000121753.11	BAI2	chr1:31727116-31764893	Ctrl	siHIF1A	OK	0.811257	0.263726	-1.62112	-1.31058	5e-05	0.000604383	yes
ENSG00000121966.6	ENSG00000121966.6	CXCR4	chr2:136114348-136118165	Ctrl	siHIF1A	OK	101.461	78.9845	-0.361283	-1.49832	5e-05	0.000604383	yes
ENSG00000122026.9	ENSG00000122026.9	RPL21	chr13:27251308-27256691	Ctrl	siHIF1A	OK	730.379	543.292	-0.426917	-1.65207	5e-05	0.000604383	yes
ENSG00000122406.11	ENSG00000122406.11	RPL5	chr1:92832024-92961522	Ctrl	siHIF1A	OK	634.341	438.92	-0.531302	-2.01574	5e-05	0.000604383	yes
ENSG00000122694.14	ENSG00000122694.14	GLIPR2	chr9:36136535-36163913	Ctrl	siHIF1A	OK	8.69121	5.168	-0.74995	-2.45457	5e-05	0.000604383	yes
ENSG00000122778.8	ENSG00000122778.8	KIAA1549	chr7:138706294-138981318	Ctrl	siHIF1A	OK	3.28905	2.01797	-0.70477	-2.39332	5e-05	0.000604383	yes
ENSG00000122862.4	ENSG00000122862.4	SRGN	chr10:69088105-69104811	Ctrl	siHIF1A	OK	375.691	615.292	0.711725	2.66658	5e-05	0.000604383	yes
ENSG00000122884.11	ENSG00000122884.11	P4HA1	chr10:73007216-73096974	Ctrl	siHIF1A	OK	65.4404	34.8694	-0.908219	-3.64247	5e-05	0.000604383	yes
ENSG00000123131.11	ENSG00000123131.11	PRDX4	chrX:23664261-23686399	Ctrl	siHIF1A	OK	41.6666	84.0367	1.01213	3.93944	5e-05	0.000604383	yes
ENSG00000123159.14	ENSG00000123159.14	GIPC1	chr19:14477759-14496149	Ctrl	siHIF1A	OK	61.0457	34.4912	-0.823663	-3.13425	5e-05	0.000604383	yes
ENSG00000123358.18	ENSG00000123358.18	NR4A1	chr12:52022831-52059507	Ctrl	siHIF1A	OK	1.78448	0.815966	-1.12892	-1.20183	5e-05	0.000604383	yes
ENSG00000123609.9	ENSG00000123609.9	NMI	chr2:151270464-151290057	Ctrl	siHIF1A	OK	8.72655	12.4509	0.512765	1.67015	5e-05	0.000604383	yes
ENSG00000123892.10	ENSG00000123892.10	RAB38	chr11:88098590-88175467	Ctrl	siHIF1A	OK	2.39757	1.13727	-1.076	-2.27447	5e-05	0.000604383	yes
ENSG00000124006.13	ENSG00000124006.13	OBSL1	chr2:219550728-219575713	Ctrl	siHIF1A	OK	7.27861	4.90643	-0.568989	-1.62055	5e-05	0.000604383	yes
ENSG00000124019.9	ENSG00000124019.9	FAM124B	chr2:224378697-224402085	Ctrl	siHIF1A	OK	125.964	59.7803	-1.07527	-4.33622	5e-05	0.000604383	yes
ENSG00000124098.9	ENSG00000124098.9	FAM210B	chr20:56358914-56368663	Ctrl	siHIF1A	OK	26.0552	42.9128	0.719836	2.61175	5e-05	0.000604383	yes
ENSG00000124145.6	ENSG00000124145.6	SDC4	chr20:45325287-45348424	Ctrl	siHIF1A	OK	6.83167	16.2148	1.247	4.55648	5e-05	0.000604383	yes
ENSG00000124191.16	ENSG00000124191.16	TOX2	chr20:43914863-44069616	Ctrl	siHIF1A	OK	2.95843	1.63459	-0.855904	-1.89286	5e-05	0.000604383	yes
ENSG00000124201.13	ENSG00000124201.13	ZNFX1	chr20:49219294-49295738	Ctrl	siHIF1A	OK	15.3902	24.3244	0.660392	1.93669	5e-05	0.000604383	yes
ENSG00000124212.5	ENSG00000124212.5	PTGIS	chr20:49503873-49568146	Ctrl	siHIF1A	OK	20.0596	6.11248	-1.71446	-5.09375	5e-05	0.000604383	yes
ENSG00000124383.7	ENSG00000124383.7	MPHOSPH10	chr2:71130313-71150101	Ctrl	siHIF1A	OK	5.97005	8.95565	0.585054	1.65612	5e-05	0.000604383	yes
ENSG00000124523.13	ENSG00000124523.13	SIRT5	chr6:13574528-13615158	Ctrl	siHIF1A	OK	3.26121	6.43276	0.980033	2.62068	5e-05	0.000604383	yes
ENSG00000124570.16	ENSG00000124570.16	SERPINB6	chr6:2948158-2972165	Ctrl	siHIF1A	OK	43.3284	59.217	0.450698	1.78379	5e-05	0.000604383	yes
ENSG00000124575.6	ENSG00000124575.6	HIST1H1D	chr6:26234267-26234933	Ctrl	siHIF1A	OK	8.53882	3.70814	-1.20334	-2.82844	5e-05	0.000604383	yes
ENSG00000124593.13	ENSG00000124593.13	PRICKLE4	chr6:41770175-41895361	Ctrl	siHIF1A	OK	7.40329	16.0549	1.11677	2.11759	5e-05	0.000604383	yes
ENSG00000124608.4	ENSG00000124608.4	AARS2	chr6:44270465-44378957	Ctrl	siHIF1A	OK	4.38552	6.3088	0.524618	1.69837	5e-05	0.000604383	yes
ENSG00000124641.13	ENSG00000124641.13	MED20	chr6:41905353-41921139	Ctrl	siHIF1A	OK	10.8901	16.1396	0.56759	1.90969	5e-05	0.000604383	yes
ENSG00000124688.12	ENSG00000124688.12	MAD2L1BP	chr6:43629539-43640952	Ctrl	siHIF1A	OK	18.8387	12.676	-0.571597	-1.91666	5e-05	0.000604383	yes
ENSG00000124702.16	ENSG00000124702.16	KLHDC3	chr6:43014102-43021298	Ctrl	siHIF1A	OK	29.3573	42.6895	0.540162	2.18967	5e-05	0.000604383	yes
ENSG00000124721.16	ENSG00000124721.16	DNAH8	chr6:38715340-39030529	Ctrl	siHIF1A	OK	0.893981	0.120394	-2.89248	-1.34939	5e-05	0.000604383	yes
ENSG00000124767.6	ENSG00000124767.6	GLO1	chr6:38675924-38703141	Ctrl	siHIF1A	OK	80.8932	58.2378	-0.474062	-1.9654	5e-05	0.000604383	yes
ENSG00000124785.7	ENSG00000124785.7	NRN1	chr6:5997998-6007605	Ctrl	siHIF1A	OK	0.985455	0.474751	-1.05362	-1.52871	5e-05	0.000604383	yes
ENSG00000124789.10	ENSG00000124789.10	NUP153	chr6:17615034-17707344	Ctrl	siHIF1A	OK	14.422	9.49779	-0.602611	-2.36933	5e-05	0.000604383	yes
ENSG00000124875.8	ENSG00000124875.8	CXCL6	chr4:73836496-73849064	Ctrl	siHIF1A	OK	2.10837	0.919876	-1.19661	-1.99731	5e-05	0.000604383	yes
ENSG00000125122.13	ENSG00000125122.13	LRRC29	chr16:67207138-67227048	Ctrl	siHIF1A	OK	1.01182	1.91528	0.920609	1.51997	5e-05	0.000604383	yes
ENSG00000125148.6	ENSG00000125148.6	MT2A	chr16:56608198-56609497	Ctrl	siHIF1A	OK	426.291	942.601	1.14481	4.49209	5e-05	0.000604383	yes
ENSG00000125257.12	ENSG00000125257.12	ABCC4	chr13:95019828-95301446	Ctrl	siHIF1A	OK	15.366	9.51928	-0.690817	-2.1151	5e-05	0.000604383	yes
ENSG00000125538.10	ENSG00000125538.10	IL1B	chr2:112829750-112836903	Ctrl	siHIF1A	OK	0.728382	0.105833	-2.7829	-0.928946	5e-05	0.000604383	yes
ENSG00000125691.11	ENSG00000125691.11	RPL23	chr17:38847864-38853843	Ctrl	siHIF1A	OK	955.145	676.533	-0.497559	-1.88874	5e-05	0.000604383	yes
ENSG00000125844.14	ENSG00000125844.14	RRBP1	chr20:17613677-17682295	Ctrl	siHIF1A	OK	37.7787	68.1349	0.850819	2.481	5e-05	0.000604383	yes
ENSG00000125898.11	ENSG00000125898.11	FAM110A	chr20:833714-857463	Ctrl	siHIF1A	OK	3.84582	2.27299	-0.758697	-1.82859	5e-05	0.000604383	yes
ENSG00000125945.13	ENSG00000125945.13	ZNF436	chr1:23359447-23371839	Ctrl	siHIF1A	OK	11.9094	8.72417	-0.449012	-1.67899	5e-05	0.000604383	yes
ENSG00000125965.7	ENSG00000125965.7	GDF5	chr20:35433028-35454746	Ctrl	siHIF1A	OK	0.603558	1.0016	0.73074	1.48442	5e-05	0.000604383	yes
ENSG00000125968.8	ENSG00000125968.8	ID1	chr20:31605282-31606515	Ctrl	siHIF1A	OK	39.8059	54.7506	0.459892	1.75965	5e-05	0.000604383	yes
ENSG00000126107.13	ENSG00000126107.13	HECTD3	chr1:45002539-45011329	Ctrl	siHIF1A	OK	17.6104	9.71888	-0.857561	-2.18001	5e-05	0.000604383	yes
ENSG00000126524.8	ENSG00000126524.8	SBDS	chr7:66987676-67239519	Ctrl	siHIF1A	OK	28.5886	43.9171	0.619343	2.18701	5e-05	0.000604383	yes
ENSG00000126561.15	ENSG00000126561.15	STAT5A	chr17:42287546-42311943	Ctrl	siHIF1A	OK	8.76842	4.90037	-0.839427	-2.06733	5e-05	0.000604383	yes
ENSG00000126709.13	ENSG00000126709.13	IFI6	chr1:27666060-27703063	Ctrl	siHIF1A	OK	283.225	1347.85	2.25064	7.43835	5e-05	0.000604383	yes
ENSG00000126775.8	ENSG00000126775.8	ATG14	chr14:55366391-55411858	Ctrl	siHIF1A	OK	5.23744	7.25941	0.470989	1.77955	5e-05	0.000604383	yes
ENSG00000126787.11	ENSG00000126787.11	DLGAP5	chr14:55148111-55191678	Ctrl	siHIF1A	OK	6.65894	3.95689	-0.750925	-2.28002	5e-05	0.000604383	yes
ENSG00000127311.8	ENSG00000127311.8	HELB	chr12:66302544-66804186	Ctrl	siHIF1A	OK	1.27832	0.605021	-1.07919	-1.35102	5e-05	0.000604383	yes
ENSG00000127334.10	ENSG00000127334.10	DYRK2	chr12:67648337-67670919	Ctrl	siHIF1A	OK	5.41027	2.82325	-0.938344	-1.93952	5e-05	0.000604383	yes
ENSG00000127419.15	ENSG00000127419.15	TMEM175	chr4:932386-958656	Ctrl	siHIF1A	OK	5.8894	11.4175	0.955049	1.84149	5e-05	0.000604383	yes
ENSG00000127528.5	ENSG00000127528.5	KLF2	chr19:16324816-16327874	Ctrl	siHIF1A	OK	10.2604	18.7145	0.867068	2.74702	5e-05	0.000604383	yes
ENSG00000127920.5	ENSG00000127920.5	GNG11	chr7:93921698-93928610	Ctrl	siHIF1A	OK	170.464	304.508	0.83701	3.15885	5e-05	0.000604383	yes
ENSG00000127952.15	ENSG00000127952.15	STYXL1	chr7:75996337-76048004	Ctrl	siHIF1A	OK	11.7432	19.217	0.710559	2.06313	5e-05	0.000604383	yes
ENSG00000128050.7	ENSG00000128050.7	PAICS	chr4:56435740-56464579	Ctrl	siHIF1A	OK	35.4563	26.0173	-0.446573	-1.45538	5e-05	0.000604383	yes
ENSG00000128059.7	ENSG00000128059.7	PPAT	chr4:56393361-56435615	Ctrl	siHIF1A	OK	8.34866	4.08516	-1.03115	-3.2664	5e-05	0.000604383	yes
ENSG00000128245.13	ENSG00000128245.13	YWHAH	chr22:31933520-31957603	Ctrl	siHIF1A	OK	35.5388	55.3569	0.639367	2.61351	5e-05	0.000604383	yes
ENSG00000128274.14	ENSG00000128274.14	A4GALT	chr22:42692120-42721298	Ctrl	siHIF1A	OK	10.6561	15.8022	0.56845	1.62454	5e-05	0.000604383	yes
ENSG00000128284.18	ENSG00000128284.18	APOL3	chr22:36140329-36166177	Ctrl	siHIF1A	OK	21.0246	33.8396	0.68663	1.86475	5e-05	0.000604383	yes
ENSG00000128335.12	ENSG00000128335.12	APOL2	chr22:36226202-36239954	Ctrl	siHIF1A	OK	14.3576	21.8685	0.60704	1.79214	5e-05	0.000604383	yes
ENSG00000128340.13	ENSG00000128340.13	RAC2	chr22:37225260-37244448	Ctrl	siHIF1A	OK	85.1389	50.1813	-0.762668	-3.07172	5e-05	0.000604383	yes
ENSG00000128567.15	ENSG00000128567.15	PODXL	chr7:131500261-131558217	Ctrl	siHIF1A	OK	42.6599	107.704	1.33612	3.83112	5e-05	0.000604383	yes
ENSG00000128595.15	ENSG00000128595.15	CALU	chr7:128739291-128771807	Ctrl	siHIF1A	OK	129.189	177.484	0.458205	1.74096	5e-05	0.000604383	yes
ENSG00000128596.15	ENSG00000128596.15	CCDC136	chr7:128790756-128822132	Ctrl	siHIF1A	OK	1.43332	0.410003	-1.80566	-1.28957	5e-05	0.000604383	yes
ENSG00000128602.8	ENSG00000128602.8	SMO	chr7:129188871-129213545	Ctrl	siHIF1A	OK	3.75416	2.26972	-0.725975	-2.07578	5e-05	0.000604383	yes
ENSG00000128606.11	ENSG00000128606.11	LRRC17	chr7:102813229-103074843	Ctrl	siHIF1A	OK	6.53744	1.41856	-2.2043	-2.6471	5e-05	0.000604383	yes
ENSG00000128641.16	ENSG00000128641.16	MYO1B	chr2:191229164-191425389	Ctrl	siHIF1A	OK	15.8685	7.35692	-1.10899	-2.84834	5e-05	0.000604383	yes
ENSG00000128791.10	ENSG00000128791.10	TWSG1	chr18:9334766-9402420	Ctrl	siHIF1A	OK	39.2064	23.3539	-0.747422	-3.04701	5e-05	0.000604383	yes
ENSG00000129195.14	ENSG00000129195.14	FAM64A	chr17:6444414-6556494	Ctrl	siHIF1A	OK	3.1169	1.47914	-1.07536	-1.87305	5e-05	0.000604383	yes
ENSG00000129422.12	ENSG00000129422.12	MTUS1	chr8:17576432-17800917	Ctrl	siHIF1A	OK	139.783	100.319	-0.478602	-1.27931	5e-05	0.000604383	yes
ENSG00000129467.12	ENSG00000129467.12	ADCY4	chr14:24318348-24340045	Ctrl	siHIF1A	OK	38.5881	65.2524	0.757874	1.9494	5e-05	0.000604383	yes
ENSG00000129518.7	ENSG00000129518.7	EAPP	chr14:34515928-34539711	Ctrl	siHIF1A	OK	6.43947	10.899	0.759185	2.429	5e-05	0.000604383	yes
ENSG00000129521.12	ENSG00000129521.12	EGLN3	chr14:33924230-34462774	Ctrl	siHIF1A	OK	8.50278	1.83395	-2.21298	-2.81272	5e-05	0.000604383	yes
ENSG00000129538.12	ENSG00000129538.12	RNASE1	chr14:20801227-20803278	Ctrl	siHIF1A	OK	287.908	209.63	-0.457763	-1.82022	5e-05	0.000604383	yes
ENSG00000129691.14	ENSG00000129691.14	ASH2L	chr8:38105241-38213301	Ctrl	siHIF1A	OK	16.407	10.3408	-0.665962	-1.49252	5e-05	0.000604383	yes
ENSG00000129757.11	ENSG00000129757.11	CDKN1C	chr11:2883212-2885881	Ctrl	siHIF1A	OK	4.88639	1.50778	-1.69634	-3.21154	5e-05	0.000604383	yes
ENSG00000129810.13	ENSG00000129810.13	SGOL1	chr3:20160592-20186427	Ctrl	siHIF1A	OK	1.34055	0.668773	-1.00324	-1.58028	5e-05	0.000604383	yes
ENSG00000129946.9	ENSG00000129946.9	SHC2	chr19:416582-460996	Ctrl	siHIF1A	OK	6.17043	2.80525	-1.13724	-2.80077	5e-05	0.000604383	yes
ENSG00000130021.12	ENSG00000130021.12	HDHD1	chrX:7048919-7148190	Ctrl	siHIF1A	OK	17.3851	12.6066	-0.463675	-1.73402	5e-05	0.000604383	yes
ENSG00000130147.14	ENSG00000130147.14	SH3BP4	chr2:234951972-235055714	Ctrl	siHIF1A	OK	38.7083	27.7664	-0.479303	-1.30876	5e-05	0.000604383	yes
ENSG00000130300.7	ENSG00000130300.7	PLVAP	chr19:17351447-17377350	Ctrl	siHIF1A	OK	6.85346	1.27058	-2.43135	-4.19724	5e-05	0.000604383	yes
ENSG00000130303.11	ENSG00000130303.11	BST2	chr19:17402938-17405648	Ctrl	siHIF1A	OK	109.724	280.685	1.35508	5.25892	5e-05	0.000604383	yes
ENSG00000130305.15	ENSG00000130305.15	NSUN5	chr7:73302516-73308867	Ctrl	siHIF1A	OK	3.04301	1.25132	-1.28205	-2.02254	5e-05	0.000604383	yes
ENSG00000130349.8	ENSG00000130349.8	C6orf203	chr6:107028212-107051342	Ctrl	siHIF1A	OK	7.69101	11.8153	0.619412	1.90524	5e-05	0.000604383	yes
ENSG00000130560.7	ENSG00000130560.7	UBAC1	chr9:135932968-135961380	Ctrl	siHIF1A	OK	11.187	16.8088	0.587394	1.95373	5e-05	0.000604383	yes
ENSG00000130584.9	ENSG00000130584.9	ZBTB46	chr20:63743665-63831244	Ctrl	siHIF1A	OK	1.52878	2.50671	0.713417	1.70685	5e-05	0.000604383	yes
ENSG00000130589.15	ENSG00000130589.15	HELZ2	chr20:63558085-63574239	Ctrl	siHIF1A	OK	12.2113	34.7257	1.50778	3.49254	5e-05	0.000604383	yes
ENSG00000130635.14	ENSG00000130635.14	COL5A1	chr9:134641773-134844843	Ctrl	siHIF1A	OK	23.0282	37	0.684127	1.71126	5e-05	0.000604383	yes
ENSG00000130638.14	ENSG00000130638.14	ATXN10	chr22:45657018-45845307	Ctrl	siHIF1A	OK	33.7456	21.7589	-0.633094	-1.57499	5e-05	0.000604383	yes
ENSG00000130684.12	ENSG00000130684.12	ZNF337	chr20:25612934-25696841	Ctrl	siHIF1A	OK	4.98751	7.27316	0.544263	1.63749	5e-05	0.000604383	yes
ENSG00000130762.13	ENSG00000130762.13	ARHGEF16	chr1:3454425-3481113	Ctrl	siHIF1A	OK	0.819489	0.308978	-1.40722	-1.63425	5e-05	0.000604383	yes
ENSG00000130779.18	ENSG00000130779.18	CLIP1	chr12:122271431-122422632	Ctrl	siHIF1A	OK	13.4954	18.898	0.485767	1.65435	5e-05	0.000604383	yes
ENSG00000130787.12	ENSG00000130787.12	HIP1R	chr12:122834452-122862960	Ctrl	siHIF1A	OK	33.4004	56.0597	0.747098	2.22943	5e-05	0.000604383	yes
ENSG00000130813.16	ENSG00000130813.16	C19orf66	chr19:10086121-10102796	Ctrl	siHIF1A	OK	13.3339	23.6947	0.829465	2.39458	5e-05	0.000604383	yes
ENSG00000130818.9	ENSG00000130818.9	ZNF426	chr19:9523223-9538627	Ctrl	siHIF1A	OK	2.7287	6.47843	1.24743	3.872	5e-05	0.000604383	yes
ENSG00000130821.14	ENSG00000130821.14	SLC6A8	chrX:153669729-153696593	Ctrl	siHIF1A	OK	37.2441	22.5257	-0.725444	-1.89733	5e-05	0.000604383	yes
ENSG00000130956.12	ENSG00000130956.12	HABP4	chr9:96450200-96619830	Ctrl	siHIF1A	OK	1.17916	2.98587	1.3404	3.15532	5e-05	0.000604383	yes
ENSG00000131016.15	ENSG00000131016.15	AKAP12	chr6:151239998-151358557	Ctrl	siHIF1A	OK	158.873	114	-0.478836	-1.56991	5e-05	0.000604383	yes
ENSG00000131019.9	ENSG00000131019.9	ULBP3	chr6:150063149-150069095	Ctrl	siHIF1A	OK	3.41637	1.70302	-1.00437	-2.27287	5e-05	0.000604383	yes
ENSG00000131378.12	ENSG00000131378.12	RFTN1	chr3:16265159-16514026	Ctrl	siHIF1A	OK	14.7241	24.7538	0.749467	2.45579	5e-05	0.000604383	yes
ENSG00000131386.16	ENSG00000131386.16	GALNT15	chr3:16174648-16231992	Ctrl	siHIF1A	OK	3.75611	10.1011	1.4272	4.13527	5e-05	0.000604383	yes
ENSG00000131389.15	ENSG00000131389.15	SLC6A6	chr3:14402575-14542081	Ctrl	siHIF1A	OK	50.3089	13.6297	-1.88406	-4.61404	5e-05	0.000604383	yes
ENSG00000131459.11	ENSG00000131459.11	GFPT2	chr5:180300689-180353387	Ctrl	siHIF1A	OK	2.00269	1.12871	-0.827264	-1.48997	5e-05	0.000604383	yes
ENSG00000131477.9	ENSG00000131477.9	RAMP2	chr17:42753913-42763041	Ctrl	siHIF1A	OK	19.3369	38.5903	0.996879	2.96839	5e-05	0.000604383	yes
ENSG00000131669.8	ENSG00000131669.8	NINJ1	chr9:93121488-93134288	Ctrl	siHIF1A	OK	68.7121	38.0681	-0.851982	-3.41013	5e-05	0.000604383	yes
ENSG00000131747.13	ENSG00000131747.13	TOP2A	chr17:40388515-40417950	Ctrl	siHIF1A	OK	10.2925	5.65495	-0.864007	-2.79935	5e-05	0.000604383	yes
ENSG00000131773.12	ENSG00000131773.12	KHDRBS3	chr8:135457456-135656722	Ctrl	siHIF1A	OK	15.1013	8.73839	-0.789237	-1.59587	5e-05	0.000604383	yes
ENSG00000131941.6	ENSG00000131941.6	RHPN2	chr19:32978592-33064888	Ctrl	siHIF1A	OK	1.24996	0.607678	-1.0405	-1.44779	5e-05	0.000604383	yes
ENSG00000131979.17	ENSG00000131979.17	GCH1	chr14:54842007-54902852	Ctrl	siHIF1A	OK	2.97977	4.95017	0.732279	2.05849	5e-05	0.000604383	yes
ENSG00000131981.14	ENSG00000131981.14	LGALS3	chr14:55124109-55145413	Ctrl	siHIF1A	OK	32.8204	54.1163	0.72147	2.72015	5e-05	0.000604383	yes
ENSG00000132003.8	ENSG00000132003.8	ZSWIM4	chr19:13795459-13832230	Ctrl	siHIF1A	OK	7.56765	5.08278	-0.574228	-1.92471	5e-05	0.000604383	yes
ENSG00000132109.9	ENSG00000132109.9	TRIM21	chr11:4384896-4393696	Ctrl	siHIF1A	OK	10.4003	15.7815	0.601612	1.97643	5e-05	0.000604383	yes
ENSG00000132205.9	ENSG00000132205.9	EMILIN2	chr18:2847029-2915993	Ctrl	siHIF1A	OK	5.73089	1.96087	-1.54727	-2.82247	5e-05	0.000604383	yes
ENSG00000132274.14	ENSG00000132274.14	TRIM22	chr11:5663556-5938619	Ctrl	siHIF1A	OK	50.0276	89.5846	0.840527	2.47826	5e-05	0.000604383	yes
ENSG00000132334.15	ENSG00000132334.15	PTPRE	chr10:127907060-128085855	Ctrl	siHIF1A	OK	26.7719	48.3576	0.853022	1.67141	5e-05	0.000604383	yes
ENSG00000132436.10	ENSG00000132436.10	FIGNL1	chr7:50444127-50565457	Ctrl	siHIF1A	OK	14.4382	9.08207	-0.668793	-1.76326	5e-05	0.000604383	yes
ENSG00000132470.12	ENSG00000132470.12	ITGB4	chr17:75721327-75765711	Ctrl	siHIF1A	OK	9.34049	33.0175	1.82166	2.93091	5e-05	0.000604383	yes
ENSG00000132530.15	ENSG00000132530.15	XAF1	chr17:6755446-6776116	Ctrl	siHIF1A	OK	12.7244	46.289	1.86308	2.93215	5e-05	0.000604383	yes
ENSG00000132622.9	ENSG00000132622.9	HSPA12B	chr20:3732666-3753111	Ctrl	siHIF1A	OK	5.44873	8.29704	0.606677	2.14194	5e-05	0.000604383	yes
ENSG00000132640.13	ENSG00000132640.13	BTBD3	chr20:11890722-11926609	Ctrl	siHIF1A	OK	9.25412	4.70657	-0.97542	-2.40887	5e-05	0.000604383	yes
ENSG00000132688.10	ENSG00000132688.10	NES	chr1:156668762-156677397	Ctrl	siHIF1A	OK	38.8078	57.1974	0.559604	2.24881	5e-05	0.000604383	yes
ENSG00000132718.8	ENSG00000132718.8	SYT11	chr1:155859508-155885199	Ctrl	siHIF1A	OK	12.3351	8.21601	-0.586257	-2.36857	5e-05	0.000604383	yes
ENSG00000132963.7	ENSG00000132963.7	POMP	chr13:28659103-28678925	Ctrl	siHIF1A	OK	88.3397	68.1884	-0.373535	-1.52822	5e-05	0.000604383	yes
ENSG00000133101.8	ENSG00000133101.8	CCNA1	chr13:36431519-36442882	Ctrl	siHIF1A	OK	16.5371	4.48218	-1.88343	-6.20428	5e-05	0.000604383	yes
ENSG00000133106.13	ENSG00000133106.13	EPSTI1	chr13:42886387-42992271	Ctrl	siHIF1A	OK	2.54326	8.84348	1.79793	2.87714	5e-05	0.000604383	yes
ENSG00000133393.11	ENSG00000133393.11	FOPNL	chr16:15865719-15888625	Ctrl	siHIF1A	OK	12.2184	22.2973	0.867809	2.87642	5e-05	0.000604383	yes
ENSG00000133466.12	ENSG00000133466.12	C1QTNF6	chr22:37125837-37199385	Ctrl	siHIF1A	OK	10.3849	6.90899	-0.587944	-1.94653	5e-05	0.000604383	yes
ENSG00000133561.14	ENSG00000133561.14	GIMAP6	chr7:150625374-150632648	Ctrl	siHIF1A	OK	45.6307	80.9535	0.827089	2.90519	5e-05	0.000604383	yes
ENSG00000133657.13	ENSG00000133657.13	ATP13A3	chr3:194402671-194518279	Ctrl	siHIF1A	OK	63.0564	29.5668	-1.09266	-2.33458	5e-05	0.000604383	yes
ENSG00000133800.7	ENSG00000133800.7	LYVE1	chr11:10541271-10693988	Ctrl	siHIF1A	OK	25.7277	52.5719	1.03097	3.16045	5e-05	0.000604383	yes
ENSG00000133805.14	ENSG00000133805.14	AMPD3	chr11:10308312-10507579	Ctrl	siHIF1A	OK	2.83311	1.28864	-1.13654	-1.30432	5e-05	0.000604383	yes
ENSG00000134013.14	ENSG00000134013.14	LOXL2	chr8:23297188-23457695	Ctrl	siHIF1A	OK	148.503	103.276	-0.523985	-1.26289	5e-05	0.000604383	yes
ENSG00000134049.4	ENSG00000134049.4	IER3IP1	chr18:47105945-47176374	Ctrl	siHIF1A	OK	9.69431	17.0112	0.811279	2.60456	5e-05	0.000604383	yes
ENSG00000134057.13	ENSG00000134057.13	CCNB1	chr5:69167009-69178245	Ctrl	siHIF1A	OK	22.5947	13.3059	-0.763923	-2.62451	5e-05	0.000604383	yes
ENSG00000134107.4	ENSG00000134107.4	BHLHE40	chr3:4896808-4985323	Ctrl	siHIF1A	OK	37.9019	25.8025	-0.554759	-1.82551	5e-05	0.000604383	yes
ENSG00000134138.18	ENSG00000134138.18	MEIS2	chr15:36889203-37101299	Ctrl	siHIF1A	OK	15.3859	28.698	0.899339	2.52339	5e-05	0.000604383	yes
ENSG00000134202.9	ENSG00000134202.9	GSTM3	chr1:109712254-109775428	Ctrl	siHIF1A	OK	28.4282	18.1883	-0.644312	-2.07155	5e-05	0.000604383	yes
ENSG00000134222.15	ENSG00000134222.15	PSRC1	chr1:109279555-109283186	Ctrl	siHIF1A	OK	3.70143	1.66685	-1.15096	-2.49866	5e-05	0.000604383	yes
ENSG00000134243.10	ENSG00000134243.10	SORT1	chr1:109309567-109397951	Ctrl	siHIF1A	OK	10.6772	6.17768	-0.789402	-2.60457	5e-05	0.000604383	yes
ENSG00000134250.16	ENSG00000134250.16	NOTCH2	chr1:119911552-120069626	Ctrl	siHIF1A	OK	11.4936	6.06662	-0.92186	-2.31567	5e-05	0.000604383	yes
ENSG00000134321.10	ENSG00000134321.10	RSAD2	chr2:6840569-6898239	Ctrl	siHIF1A	OK	0.714251	7.72258	3.43458	4.29243	5e-05	0.000604383	yes
ENSG00000134323.10	ENSG00000134323.10	MYCN	chr2:15920398-15947007	Ctrl	siHIF1A	OK	0.990127	0.426087	-1.21646	-2.20128	5e-05	0.000604383	yes
ENSG00000134326.10	ENSG00000134326.10	CMPK2	chr2:6840569-6898239	Ctrl	siHIF1A	OK	0.635479	5.76995	3.18264	3.14472	5e-05	0.000604383	yes
ENSG00000134333.12	ENSG00000134333.12	LDHA	chr11:18394387-18408425	Ctrl	siHIF1A	OK	289.959	90.4936	-1.67996	-6.17679	5e-05	0.000604383	yes
ENSG00000134352.18	ENSG00000134352.18	IL6ST	chr5:55935094-55994993	Ctrl	siHIF1A	OK	244.418	165.078	-0.566206	-0.870228	5e-05	0.000604383	yes
ENSG00000134508.11	ENSG00000134508.11	CABLES1	chr18:23134563-23437961	Ctrl	siHIF1A	OK	18.6483	35.9958	0.948785	2.31621	5e-05	0.000604383	yes
ENSG00000134532.14	ENSG00000134532.14	SOX5	chr12:23529499-23951032	Ctrl	siHIF1A	OK	0.919648	0.250196	-1.87802	-0.889794	5e-05	0.000604383	yes
ENSG00000134594.4	ENSG00000134594.4	RAB33A	chrX:130171648-130184870	Ctrl	siHIF1A	OK	0.92233	0.34735	-1.40889	-2.01646	5e-05	0.000604383	yes
ENSG00000134668.11	ENSG00000134668.11	SPOCD1	chr1:31789129-31816051	Ctrl	siHIF1A	OK	16.8545	10.9808	-0.618144	-2.21129	5e-05	0.000604383	yes
ENSG00000134758.12	ENSG00000134758.12	RNF138	chr18:32018371-32470484	Ctrl	siHIF1A	OK	13.7236	8.47511	-0.695358	-1.58615	5e-05	0.000604383	yes
ENSG00000134769.20	ENSG00000134769.20	DTNA	chr18:34493289-34891844	Ctrl	siHIF1A	OK	1.88427	0.949805	-0.988302	-1.09464	5e-05	0.000604383	yes
ENSG00000134802.16	ENSG00000134802.16	SLC43A3	chr11:57386793-57427580	Ctrl	siHIF1A	OK	69.5706	27.5389	-1.33701	-4.2818	5e-05	0.000604383	yes
ENSG00000134955.10	ENSG00000134955.10	SLC37A2	chr11:125063066-125090312	Ctrl	siHIF1A	OK	1.01152	2.44485	1.27322	2.30491	5e-05	0.000604383	yes
ENSG00000135046.12	ENSG00000135046.12	ANXA1	chr9:73151756-73170393	Ctrl	siHIF1A	OK	150.308	239.243	0.670554	2.59259	5e-05	0.000604383	yes
ENSG00000135047.13	ENSG00000135047.13	CTSL	chr9:87725518-87731393	Ctrl	siHIF1A	OK	61.347	84.5883	0.463467	1.79609	5e-05	0.000604383	yes
ENSG00000135052.15	ENSG00000135052.15	GOLM1	chr9:86026145-86100173	Ctrl	siHIF1A	OK	36.1717	54.8554	0.600771	2.05337	5e-05	0.000604383	yes
ENSG00000135114.11	ENSG00000135114.11	OASL	chr12:121019110-121039242	Ctrl	siHIF1A	OK	0.563834	2.21613	1.9747	3.23265	5e-05	0.000604383	yes
ENSG00000135312.5	ENSG00000135312.5	HTR1B	chr6:77462204-77463464	Ctrl	siHIF1A	OK	11.3072	24.0717	1.0901	3.77584	5e-05	0.000604383	yes
ENSG00000135324.5	ENSG00000135324.5	MRAP2	chr6:84033755-84090881	Ctrl	siHIF1A	OK	1.20484	0.56834	-1.08402	-2.18838	5e-05	0.000604383	yes
ENSG00000135547.7	ENSG00000135547.7	HEY2	chr6:125578557-125761269	Ctrl	siHIF1A	OK	1.50987	0.731138	-1.04621	-2.26099	5e-05	0.000604383	yes
ENSG00000135643.4	ENSG00000135643.4	KCNMB4	chr12:70366275-70434292	Ctrl	siHIF1A	OK	2.24806	1.06946	-1.0718	-1.8111	5e-05	0.000604383	yes
ENSG00000135823.12	ENSG00000135823.12	STX6	chr1:180913153-181023121	Ctrl	siHIF1A	OK	21.5502	13.0805	-0.720282	-2.55828	5e-05	0.000604383	yes
ENSG00000135842.15	ENSG00000135842.15	FAM129A	chr1:184790723-184974550	Ctrl	siHIF1A	OK	1.10205	0.467188	-1.23811	-2.02396	5e-05	0.000604383	yes
ENSG00000135899.15	ENSG00000135899.15	SP110	chr2:230121369-230313215	Ctrl	siHIF1A	OK	5.42815	13.9446	1.36118	3.37764	5e-05	0.000604383	yes
ENSG00000135916.14	ENSG00000135916.14	ITM2C	chr2:230864638-230879248	Ctrl	siHIF1A	OK	3.22628	0.391742	-3.04189	-2.47491	5e-05	0.000604383	yes
ENSG00000135929.7	ENSG00000135929.7	CYP27A1	chr2:218781748-218815293	Ctrl	siHIF1A	OK	11.6122	7.84512	-0.565777	-1.99678	5e-05	0.000604383	yes
ENSG00000136098.15	ENSG00000136098.15	NEK3	chr13:52033610-52159861	Ctrl	siHIF1A	OK	7.92197	4.49085	-0.818871	-1.96837	5e-05	0.000604383	yes
ENSG00000136108.13	ENSG00000136108.13	CKAP2	chr13:52455428-52476628	Ctrl	siHIF1A	OK	8.77395	5.21362	-0.750941	-2.60826	5e-05	0.000604383	yes
ENSG00000136158.9	ENSG00000136158.9	SPRY2	chr13:80335975-80340951	Ctrl	siHIF1A	OK	14.2314	9.86472	-0.528729	-1.96366	5e-05	0.000604383	yes
ENSG00000136193.15	ENSG00000136193.15	SCRN1	chr7:29920102-30026684	Ctrl	siHIF1A	OK	30.013	41.7323	0.475579	1.55118	5e-05	0.000604383	yes
ENSG00000136295.13	ENSG00000136295.13	TTYH3	chr7:2631950-2664802	Ctrl	siHIF1A	OK	73.6268	50.9159	-0.532117	-1.58773	5e-05	0.000604383	yes
ENSG00000136449.12	ENSG00000136449.12	MYCBPAP	chr17:50508383-50531501	Ctrl	siHIF1A	OK	0.844421	2.68348	1.66807	2.00257	5e-05	0.000604383	yes
ENSG00000136478.6	ENSG00000136478.6	TEX2	chr17:64147226-64263301	Ctrl	siHIF1A	OK	8.93142	12.8966	0.530029	1.82449	5e-05	0.000604383	yes
ENSG00000136514.2	ENSG00000136514.2	RTP4	chr3:187368331-187372076	Ctrl	siHIF1A	OK	0.76469	2.22088	1.53819	3.05053	5e-05	0.000604383	yes
ENSG00000136630.12	ENSG00000136630.12	HLX	chr1:220832762-220885059	Ctrl	siHIF1A	OK	13.3309	4.60441	-1.53369	-4.8144	5e-05	0.000604383	yes
ENSG00000136636.11	ENSG00000136636.11	KCTD3	chr1:215567391-215621807	Ctrl	siHIF1A	OK	13.4725	10.234	-0.396643	-1.41266	5e-05	0.000604383	yes
ENSG00000136807.10	ENSG00000136807.10	CDK9	chr9:127785678-127790787	Ctrl	siHIF1A	OK	21.0615	30.2074	0.520292	1.5425	5e-05	0.000604383	yes
ENSG00000136810.11	ENSG00000136810.11	TXN	chr9:110243810-110256640	Ctrl	siHIF1A	OK	206.219	96.2804	-1.09887	-4.49844	5e-05	0.000604383	yes
ENSG00000136819.13	ENSG00000136819.13	C9orf78	chr9:129827289-129881838	Ctrl	siHIF1A	OK	7.42497	14.7829	0.993473	2.40061	5e-05	0.000604383	yes
ENSG00000136826.13	ENSG00000136826.13	KLF4	chr9:107484851-107490482	Ctrl	siHIF1A	OK	1.76584	3.93525	1.1561	2.40779	5e-05	0.000604383	yes
ENSG00000136869.13	ENSG00000136869.13	TLR4	chr9:117704331-117716871	Ctrl	siHIF1A	OK	32.1134	23.1488	-0.472239	-1.52984	5e-05	0.000604383	yes
ENSG00000136897.7	ENSG00000136897.7	MRPL50	chr9:101387632-101398614	Ctrl	siHIF1A	OK	6.87243	4.87316	-0.495963	-1.74084	5e-05	0.000604383	yes
ENSG00000136938.8	ENSG00000136938.8	ANP32B	chr9:97983360-98015943	Ctrl	siHIF1A	OK	8.33056	5.49446	-0.600436	-1.70924	5e-05	0.000604383	yes
ENSG00000137033.10	ENSG00000137033.10	IL33	chr9:6215785-6257983	Ctrl	siHIF1A	OK	18.515	9.348	-0.985964	-3.60673	5e-05	0.000604383	yes
ENSG00000137054.14	ENSG00000137054.14	POLR1E	chr9:37485934-37503697	Ctrl	siHIF1A	OK	6.61628	4.53926	-0.543562	-1.79551	5e-05	0.000604383	yes
ENSG00000137154.11	ENSG00000137154.11	RPS6	chr9:19375450-19380254	Ctrl	siHIF1A	OK	796.69	583.46	-0.449384	-1.56961	5e-05	0.000604383	yes
ENSG00000137210.12	ENSG00000137210.12	TMEM14B	chr6:10747758-10979320	Ctrl	siHIF1A	OK	43.3288	29.1536	-0.571653	-1.99154	5e-05	0.000604383	yes
ENSG00000137393.9	ENSG00000137393.9	RNF144B	chr6:18387349-18468874	Ctrl	siHIF1A	OK	13.2851	22.1464	0.737259	2.96594	5e-05	0.000604383	yes
ENSG00000137414.5	ENSG00000137414.5	FAM8A1	chr6:17600354-17611719	Ctrl	siHIF1A	OK	13.4019	9.93206	-0.432275	-1.71589	5e-05	0.000604383	yes
ENSG00000137547.7	ENSG00000137547.7	MRPL15	chr8:54135209-54147901	Ctrl	siHIF1A	OK	42.1111	55.8393	0.407081	1.63722	5e-05	0.000604383	yes
ENSG00000137563.10	ENSG00000137563.10	GGH	chr8:63015078-63039171	Ctrl	siHIF1A	OK	30.819	21.6537	-0.509207	-1.78882	5e-05	0.000604383	yes
ENSG00000137573.12	ENSG00000137573.12	SULF1	chr8:69466623-69660915	Ctrl	siHIF1A	OK	0.432488	1.38729	1.68154	0.869871	5e-05	0.000604383	yes
ENSG00000137628.15	ENSG00000137628.15	DDX60	chr4:168216292-168318807	Ctrl	siHIF1A	OK	6.0094	15.7282	1.38806	3.3274	5e-05	0.000604383	yes
ENSG00000137693.12	ENSG00000137693.12	YAP1	chr11:102110460-102233423	Ctrl	siHIF1A	OK	5.75832	3.72532	-0.628283	-1.79884	5e-05	0.000604383	yes
ENSG00000137710.13	ENSG00000137710.13	RDX	chr11:110174879-110296722	Ctrl	siHIF1A	OK	99.9103	54.89	-0.864089	-2.86656	5e-05	0.000604383	yes
ENSG00000137727.11	ENSG00000137727.11	ARHGAP20	chr11:110577041-110713189	Ctrl	siHIF1A	OK	1.07169	2.36822	1.14392	3.59981	5e-05	0.000604383	yes
ENSG00000137804.11	ENSG00000137804.11	NUSAP1	chr15:41332693-41381050	Ctrl	siHIF1A	OK	9.82846	6.05713	-0.698332	-1.7395	5e-05	0.000604383	yes
ENSG00000137807.12	ENSG00000137807.12	KIF23	chr15:69298946-69448427	Ctrl	siHIF1A	OK	6.76034	3.42578	-0.980664	-2.49021	5e-05	0.000604383	yes
ENSG00000137959.14	ENSG00000137959.14	IFI44L	chr1:78619921-78646145	Ctrl	siHIF1A	OK	27.9587	121.516	2.11977	4.49875	5e-05	0.000604383	yes
ENSG00000137965.9	ENSG00000137965.9	IFI44	chr1:78649795-78664078	Ctrl	siHIF1A	OK	21.4634	74.5669	1.79666	5.1892	5e-05	0.000604383	yes
ENSG00000137968.15	ENSG00000137968.15	SLC44A5	chr1:75202130-75611116	Ctrl	siHIF1A	OK	2.12643	0.890211	-1.25622	-3.18018	5e-05	0.000604383	yes
ENSG00000138080.12	ENSG00000138080.12	EMILIN1	chr2:27078566-27086408	Ctrl	siHIF1A	OK	2.30985	3.58917	0.635847	1.90969	5e-05	0.000604383	yes
ENSG00000138160.5	ENSG00000138160.5	KIF11	chr10:92593285-92655395	Ctrl	siHIF1A	OK	3.88767	2.50272	-0.635412	-2.25352	5e-05	0.000604383	yes
ENSG00000138180.14	ENSG00000138180.14	CEP55	chr10:93496631-93529092	Ctrl	siHIF1A	OK	8.15801	4.86738	-0.745071	-2.58964	5e-05	0.000604383	yes
ENSG00000138279.14	ENSG00000138279.14	ANXA7	chr10:73375100-73414076	Ctrl	siHIF1A	OK	24.7992	38.977	0.65233	2.27042	5e-05	0.000604383	yes
ENSG00000138439.11	ENSG00000138439.11	FAM117B	chr2:202635187-202769757	Ctrl	siHIF1A	OK	2.34947	1.1792	-0.994524	-2.43571	5e-05	0.000604383	yes
ENSG00000138448.10	ENSG00000138448.10	ITGAV	chr2:186590064-186765965	Ctrl	siHIF1A	OK	166.861	100.731	-0.728132	-2.14609	5e-05	0.000604383	yes
ENSG00000138496.15	ENSG00000138496.15	PARP9	chr3:122527923-122575203	Ctrl	siHIF1A	OK	11.4622	32.1746	1.48904	3.32623	5e-05	0.000604383	yes
ENSG00000138623.8	ENSG00000138623.8	SEMA7A	chr15:74409288-74434467	Ctrl	siHIF1A	OK	0.903832	0.317169	-1.5108	-1.74681	5e-05	0.000604383	yes
ENSG00000138639.16	ENSG00000138639.16	ARHGAP24	chr4:85475113-86002670	Ctrl	siHIF1A	OK	21.6558	32.5492	0.58787	1.67226	5e-05	0.000604383	yes
ENSG00000138642.13	ENSG00000138642.13	HERC6	chr4:88378738-88443111	Ctrl	siHIF1A	OK	2.53253	11.7012	2.20801	5.06145	5e-05	0.000604383	yes
ENSG00000138668.17	ENSG00000138668.17	HNRNPD	chr4:82352497-82384027	Ctrl	siHIF1A	OK	26.6236	15.223	-0.806457	-2.34305	5e-05	0.000604383	yes
ENSG00000138675.15	ENSG00000138675.15	FGF5	chr4:80266598-80963756	Ctrl	siHIF1A	OK	5.4614	2.69738	-1.01771	-2.98772	5e-05	0.000604383	yes
ENSG00000138757.13	ENSG00000138757.13	G3BP2	chr4:75642781-75724525	Ctrl	siHIF1A	OK	30.491	56.1245	0.880245	2.60744	5e-05	0.000604383	yes
ENSG00000138772.11	ENSG00000138772.11	ANXA3	chr4:78551518-78610451	Ctrl	siHIF1A	OK	32.3365	46.6222	0.527854	1.97763	5e-05	0.000604383	yes
ENSG00000138821.11	ENSG00000138821.11	SLC39A8	chr4:102251040-102450010	Ctrl	siHIF1A	OK	3.28438	1.28574	-1.35302	-2.29321	5e-05	0.000604383	yes
ENSG00000138867.15	ENSG00000138867.15	GUCD1	chr22:24540422-24629005	Ctrl	siHIF1A	OK	24.7658	39.5397	0.674952	1.64017	5e-05	0.000604383	yes
ENSG00000139187.8	ENSG00000139187.8	KLRG1	chr12:8950043-9010760	Ctrl	siHIF1A	OK	10.1623	5.55413	-0.871598	-2.34814	5e-05	0.000604383	yes
ENSG00000139289.12	ENSG00000139289.12	PHLDA1	chr12:76025446-76033932	Ctrl	siHIF1A	OK	28.941	21.3729	-0.437329	-1.7306	5e-05	0.000604383	yes
ENSG00000139318.7	ENSG00000139318.7	DUSP6	chr12:89347231-89353271	Ctrl	siHIF1A	OK	116.572	66.2397	-0.815451	-2.41567	5e-05	0.000604383	yes
ENSG00000139354.9	ENSG00000139354.9	GAS2L3	chr12:100573682-100628286	Ctrl	siHIF1A	OK	19.3642	9.74047	-0.991331	-2.24162	5e-05	0.000604383	yes
ENSG00000139505.11	ENSG00000139505.11	MTMR6	chr13:25246200-25288009	Ctrl	siHIF1A	OK	14.332	8.7093	-0.718609	-2.79544	5e-05	0.000604383	yes
ENSG00000139549.2	ENSG00000139549.2	DHH	chr12:49089420-49094819	Ctrl	siHIF1A	OK	2.87285	1.22278	-1.23232	-2.63845	5e-05	0.000604383	yes
ENSG00000139726.9	ENSG00000139726.9	DENR	chr12:122752773-122771064	Ctrl	siHIF1A	OK	17.3733	29.2398	0.751064	2.48988	5e-05	0.000604383	yes
ENSG00000139737.20	ENSG00000139737.20	SLAIN1	chr13:77697853-77764242	Ctrl	siHIF1A	OK	1.00817	0.398362	-1.33959	-1.0901	5e-05	0.000604383	yes
ENSG00000139832.4	ENSG00000139832.4	RAB20	chr13:110523065-110561733	Ctrl	siHIF1A	OK	1.42283	0.48836	-1.54275	-2.72054	5e-05	0.000604383	yes
ENSG00000139921.11	ENSG00000139921.11	TMX1	chr14:51240161-51257546	Ctrl	siHIF1A	OK	42.5362	23.3783	-0.863521	-3.16074	5e-05	0.000604383	yes
ENSG00000140092.13	ENSG00000140092.13	FBLN5	chr14:91869411-91947987	Ctrl	siHIF1A	OK	5.63272	3.54523	-0.667953	-1.50867	5e-05	0.000604383	yes
ENSG00000140105.16	ENSG00000140105.16	WARS	chr14:100333787-100530303	Ctrl	siHIF1A	OK	85.5572	153.09	0.839423	2.34353	5e-05	0.000604383	yes
ENSG00000140406.3	ENSG00000140406.3	MESDC1	chr15:81000943-81005788	Ctrl	siHIF1A	OK	9.28319	6.39822	-0.536951	-1.99996	5e-05	0.000604383	yes
ENSG00000140416.18	ENSG00000140416.18	TPM1	chr15:63042631-63071915	Ctrl	siHIF1A	OK	291.326	180.163	-0.693331	-2.09955	5e-05	0.000604383	yes
ENSG00000140450.8	ENSG00000140450.8	ARRDC4	chr15:97960697-97973838	Ctrl	siHIF1A	OK	0.858197	0.308208	-1.4774	-2.96928	5e-05	0.000604383	yes
ENSG00000140678.15	ENSG00000140678.15	ITGAX	chr16:31355133-31382997	Ctrl	siHIF1A	OK	0.602731	0.0915976	-2.71813	-1.02984	5e-05	0.000604383	yes
ENSG00000140682.17	ENSG00000140682.17	TGFB1I1	chr16:31470203-31477960	Ctrl	siHIF1A	OK	48.2548	27.2487	-0.824486	-2.89799	5e-05	0.000604383	yes
ENSG00000140873.14	ENSG00000140873.14	ADAMTS18	chr16:77190834-77444336	Ctrl	siHIF1A	OK	27.2237	50.8361	0.90099	1.78156	5e-05	0.000604383	yes
ENSG00000140905.8	ENSG00000140905.8	GCSH	chr16:81053496-81096403	Ctrl	siHIF1A	OK	15.2992	9.17129	-0.738258	-2.03631	5e-05	0.000604383	yes
ENSG00000140943.15	ENSG00000140943.15	MBTPS1	chr16:84053760-84116906	Ctrl	siHIF1A	OK	34.0902	50.4073	0.564277	1.57504	5e-05	0.000604383	yes
ENSG00000141424.11	ENSG00000141424.11	SLC39A6	chr18:36108531-36129385	Ctrl	siHIF1A	OK	8.28587	6.02093	-0.460666	-1.64165	5e-05	0.000604383	yes
ENSG00000141425.16	ENSG00000141425.16	RPRD1A	chr18:35984386-36067576	Ctrl	siHIF1A	OK	23.1958	12.6214	-0.877996	-3.00562	5e-05	0.000604383	yes
ENSG00000141448.7	ENSG00000141448.7	GATA6	chr18:22169442-22205229	Ctrl	siHIF1A	OK	4.25368	2.67962	-0.66668	-1.96314	5e-05	0.000604383	yes
ENSG00000141505.10	ENSG00000141505.10	ASGR1	chr17:7173430-7179564	Ctrl	siHIF1A	OK	8.06659	4.77436	-0.756651	-1.8085	5e-05	0.000604383	yes
ENSG00000141526.13	ENSG00000141526.13	SLC16A3	chr17:82228396-82273731	Ctrl	siHIF1A	OK	186.165	95.4678	-0.963495	-2.21868	5e-05	0.000604383	yes
ENSG00000141753.6	ENSG00000141753.6	IGFBP4	chr17:40443460-40457731	Ctrl	siHIF1A	OK	103.503	163.479	0.659429	2.61071	5e-05	0.000604383	yes
ENSG00000141934.8	ENSG00000141934.8	PPAP2C	chr19:281039-291504	Ctrl	siHIF1A	OK	5.5043	3.09853	-0.828976	-1.82127	5e-05	0.000604383	yes
ENSG00000141959.15	ENSG00000141959.15	PFKL	chr21:44300050-44327376	Ctrl	siHIF1A	OK	52.9922	72.6378	0.454939	1.74447	5e-05	0.000604383	yes
ENSG00000142089.14	ENSG00000142089.14	IFITM3	chr11:318639-330122	Ctrl	siHIF1A	OK	278.296	489.378	0.81433	3.19275	5e-05	0.000604383	yes
ENSG00000142166.11	ENSG00000142166.11	IFNAR1	chr21:33324476-33359862	Ctrl	siHIF1A	OK	14.3374	9.29779	-0.624827	-1.79533	5e-05	0.000604383	yes
ENSG00000142173.13	ENSG00000142173.13	COL6A2	chr21:46098096-46132849	Ctrl	siHIF1A	OK	1.04218	0.235055	-2.14853	-1.42594	5e-05	0.000604383	yes
ENSG00000142208.14	ENSG00000142208.14	AKT1	chr14:104769348-104795751	Ctrl	siHIF1A	OK	41.7796	57.4469	0.45943	1.66933	5e-05	0.000604383	yes
ENSG00000142405.20	ENSG00000142405.20	NLRP12	chr19:53793602-53824394	Ctrl	siHIF1A	OK	0.57612	0.14008	-2.04012	-2.91656	5e-05	0.000604383	yes
ENSG00000142408.2	ENSG00000142408.2	CACNG8	chr19:53963039-53990215	Ctrl	siHIF1A	OK	1.08045	0.735251	-0.555329	-1.70713	5e-05	0.000604383	yes
ENSG00000142459.7	ENSG00000142459.7	EVI5L	chr19:7830232-7864976	Ctrl	siHIF1A	OK	4.31619	7.60853	0.817859	2.36472	5e-05	0.000604383	yes
ENSG00000142552.6	ENSG00000142552.6	RCN3	chr19:49527617-49546962	Ctrl	siHIF1A	OK	31.7281	48.3116	0.60661	1.86235	5e-05	0.000604383	yes
ENSG00000142627.12	ENSG00000142627.12	EPHA2	chr1:16124336-16157329	Ctrl	siHIF1A	OK	53.1301	76.2713	0.521612	1.76773	5e-05	0.000604383	yes
ENSG00000142784.14	ENSG00000142784.14	WDTC1	chr1:27234515-27308633	Ctrl	siHIF1A	OK	8.56095	11.8178	0.465116	1.76536	5e-05	0.000604383	yes
ENSG00000142892.13	ENSG00000142892.13	PIGK	chr1:77088989-77219430	Ctrl	siHIF1A	OK	11.5463	22.0458	0.933079	2.40832	5e-05	0.000604383	yes
ENSG00000143127.11	ENSG00000143127.11	ITGA10	chr1:145891207-145910189	Ctrl	siHIF1A	OK	35.8587	70.8642	0.982733	2.69175	5e-05	0.000604383	yes
ENSG00000143248.11	ENSG00000143248.11	RGS5	chr1:163111120-163355764	Ctrl	siHIF1A	OK	86.4126	47.5297	-0.862413	-1.85357	5e-05	0.000604383	yes
ENSG00000143344.14	ENSG00000143344.14	RGL1	chr1:183636084-183928531	Ctrl	siHIF1A	OK	17.9103	10.1431	-0.820292	-3.33148	5e-05	0.000604383	yes
ENSG00000143367.14	ENSG00000143367.14	TUFT1	chr1:151540304-151583583	Ctrl	siHIF1A	OK	1.28529	2.31018	0.845906	1.84987	5e-05	0.000604383	yes
ENSG00000143369.13	ENSG00000143369.13	ECM1	chr1:150508061-150513789	Ctrl	siHIF1A	OK	5.563	1.81302	-1.61747	-4.3645	5e-05	0.000604383	yes
ENSG00000143387.11	ENSG00000143387.11	CTSK	chr1:150796207-150808323	Ctrl	siHIF1A	OK	23.3213	15.3418	-0.60418	-2.29204	5e-05	0.000604383	yes
ENSG00000143416.19	ENSG00000143416.19	SELENBP1	chr1:151364301-151372733	Ctrl	siHIF1A	OK	4.17659	2.14996	-0.958013	-2.07938	5e-05	0.000604383	yes
ENSG00000143420.16	ENSG00000143420.16	ENSA	chr1:150600850-150629612	Ctrl	siHIF1A	OK	23.3672	43.309	0.890181	2.79302	5e-05	0.000604383	yes
ENSG00000143469.15	ENSG00000143469.15	SYT14	chr1:209938173-210171315	Ctrl	siHIF1A	OK	1.7802	0.726456	-1.29309	-3.17263	5e-05	0.000604383	yes
ENSG00000143537.12	ENSG00000143537.12	ADAM15	chr1:155033823-155062775	Ctrl	siHIF1A	OK	117.102	269.393	1.20195	3.61555	5e-05	0.000604383	yes
ENSG00000143756.10	ENSG00000143756.10	FBXO28	chr1:224114086-224162047	Ctrl	siHIF1A	OK	22.3964	14.1631	-0.66113	-2.1992	5e-05	0.000604383	yes
ENSG00000143793.11	ENSG00000143793.11	C1orf35	chr1:228100725-228105411	Ctrl	siHIF1A	OK	7.34649	11.1728	0.604863	1.87661	5e-05	0.000604383	yes
ENSG00000143815.13	ENSG00000143815.13	LBR	chr1:225401501-225428925	Ctrl	siHIF1A	OK	46.539	33.7064	-0.465415	-1.5239	5e-05	0.000604383	yes
ENSG00000143816.7	ENSG00000143816.7	WNT9A	chr1:227918655-227947898	Ctrl	siHIF1A	OK	1.46457	4.26667	1.54264	4.60059	5e-05	0.000604383	yes
ENSG00000143869.6	ENSG00000143869.6	GDF7	chr2:20666663-20679245	Ctrl	siHIF1A	OK	2.43047	1.41203	-0.783462	-2.63737	5e-05	0.000604383	yes
ENSG00000143947.11	ENSG00000143947.11	RPS27A	chr2:55174790-55235853	Ctrl	siHIF1A	OK	636.021	459.038	-0.470462	-1.77605	5e-05	0.000604383	yes
ENSG00000143952.18	ENSG00000143952.18	VPS54	chr2:63892145-64019072	Ctrl	siHIF1A	OK	11.0295	8.40316	-0.392359	-1.5327	5e-05	0.000604383	yes
ENSG00000143971.7	ENSG00000143971.7	ETAA1	chr2:67397318-67410545	Ctrl	siHIF1A	OK	5.47601	7.45978	0.446007	1.45046	5e-05	0.000604383	yes
ENSG00000144231.9	ENSG00000144231.9	POLR2D	chr2:127843550-127858157	Ctrl	siHIF1A	OK	5.9449	10.1502	0.771784	2.11011	5e-05	0.000604383	yes
ENSG00000144455.12	ENSG00000144455.12	SUMF1	chr3:3700813-4467281	Ctrl	siHIF1A	OK	28.5566	42.0353	0.557778	2.11796	5e-05	0.000604383	yes
ENSG00000144583.4	ENSG00000144583.4	2016-03-04	chr2:216257864-216372027	Ctrl	siHIF1A	OK	3.52054	5.00229	0.506793	1.73787	5e-05	0.000604383	yes
ENSG00000144810.14	ENSG00000144810.14	COL8A1	chr3:99638474-99799226	Ctrl	siHIF1A	OK	74.6136	127.952	0.778097	2.23507	5e-05	0.000604383	yes
ENSG00000144837.7	ENSG00000144837.7	PLA1A	chr3:119597841-119629811	Ctrl	siHIF1A	OK	0.136535	1.42333	3.38192	1.75768	5e-05	0.000604383	yes
ENSG00000145113.20	ENSG00000145113.20	MUC4	chr3:195746764-195812277	Ctrl	siHIF1A	OK	0.587288	0.0560073	-3.39038	-0.959478	5e-05	0.000604383	yes
ENSG00000145247.10	ENSG00000145247.10	OCIAD2	chr4:48885018-48906937	Ctrl	siHIF1A	OK	82.8539	34.3498	-1.27027	-4.07682	5e-05	0.000604383	yes
ENSG00000145386.8	ENSG00000145386.8	CCNA2	chr4:121801316-121823933	Ctrl	siHIF1A	OK	9.36124	5.91507	-0.662305	-1.681	5e-05	0.000604383	yes
ENSG00000145391.12	ENSG00000145391.12	SETD7	chr4:139495940-139606699	Ctrl	siHIF1A	OK	6.84548	19.6562	1.52176	5.36724	5e-05	0.000604383	yes
ENSG00000145882.9	ENSG00000145882.9	PCYOX1L	chr5:149358006-149369653	Ctrl	siHIF1A	OK	4.7553	9.66029	1.02253	3.54946	5e-05	0.000604383	yes
ENSG00000146072.6	ENSG00000146072.6	TNFRSF21	chr6:47231531-47309905	Ctrl	siHIF1A	OK	21.8714	28.5722	0.385566	1.59083	5e-05	0.000604383	yes
ENSG00000146205.12	ENSG00000146205.12	ANO7	chr2:241188508-241225377	Ctrl	siHIF1A	OK	1.78165	0.847271	-1.07232	-1.66338	5e-05	0.000604383	yes
ENSG00000146232.13	ENSG00000146232.13	NFKBIE	chr6:44258165-44265788	Ctrl	siHIF1A	OK	13.5814	7.81301	-0.797677	-2.58261	5e-05	0.000604383	yes
ENSG00000146242.7	ENSG00000146242.7	TPBG	chr6:82363205-82370828	Ctrl	siHIF1A	OK	9.95143	4.91551	-1.01756	-3.43549	5e-05	0.000604383	yes
ENSG00000146281.5	ENSG00000146281.5	PM20D2	chr6:89146049-89165565	Ctrl	siHIF1A	OK	3.46919	2.48036	-0.484046	-1.57662	5e-05	0.000604383	yes
ENSG00000146476.9	ENSG00000146476.9	C6orf211	chr6:151452257-151470101	Ctrl	siHIF1A	OK	25.0376	17.2045	-0.541308	-2.11191	5e-05	0.000604383	yes
ENSG00000146731.9	ENSG00000146731.9	CCT6A	chr7:56051629-56063989	Ctrl	siHIF1A	OK	78.3469	54.6039	-0.520871	-1.69535	5e-05	0.000604383	yes
ENSG00000146858.7	ENSG00000146858.7	ZC3HAV1L	chr7:139025705-139036029	Ctrl	siHIF1A	OK	5.59494	3.56624	-0.649719	-1.84979	5e-05	0.000604383	yes
ENSG00000147010.16	ENSG00000147010.16	SH3KBP1	chrX:19533974-19887601	Ctrl	siHIF1A	OK	6.92917	5.07394	-0.449574	-1.56808	5e-05	0.000604383	yes
ENSG00000147027.3	ENSG00000147027.3	TMEM47	chrX:34627063-34657288	Ctrl	siHIF1A	OK	21.1825	15.3555	-0.464116	-1.86984	5e-05	0.000604383	yes
ENSG00000147113.15	ENSG00000147113.15	CXorf36	chrX:45148373-45333917	Ctrl	siHIF1A	OK	4.43488	12.7905	1.5281	4.90723	5e-05	0.000604383	yes
ENSG00000147394.17	ENSG00000147394.17	ZNF185	chrX:152914441-152973480	Ctrl	siHIF1A	OK	8.45866	12.7439	0.591302	2.26744	5e-05	0.000604383	yes
ENSG00000147454.12	ENSG00000147454.12	SLC25A37	chr8:23528804-23575463	Ctrl	siHIF1A	OK	51.6594	33.1242	-0.641146	-2.0875	5e-05	0.000604383	yes
ENSG00000147604.12	ENSG00000147604.12	RPL7	chr8:73290266-73356461	Ctrl	siHIF1A	OK	861.801	624.508	-0.464635	-1.67593	5e-05	0.000604383	yes
ENSG00000147697.7	ENSG00000147697.7	GSDMC	chr8:129748195-129786888	Ctrl	siHIF1A	OK	1.64042	5.11989	1.64204	3.04675	5e-05	0.000604383	yes
ENSG00000147854.15	ENSG00000147854.15	UHRF2	chr9:6413150-6507054	Ctrl	siHIF1A	OK	39.1448	52.7153	0.429401	1.33685	5e-05	0.000604383	yes
ENSG00000148339.11	ENSG00000148339.11	SLC25A25	chr9:128061232-128118693	Ctrl	siHIF1A	OK	4.958	9.01917	0.863236	2.1611	5e-05	0.000604383	yes
ENSG00000148660.19	ENSG00000148660.19	CAMK2G	chr10:73812500-73874591	Ctrl	siHIF1A	OK	9.11454	12.6722	0.475427	1.55334	5e-05	0.000604383	yes
ENSG00000148700.12	ENSG00000148700.12	ADD3	chr10:109940103-110135565	Ctrl	siHIF1A	OK	37.7177	16.7287	-1.17291	-2.75082	5e-05	0.000604383	yes
ENSG00000148719.13	ENSG00000148719.13	DNAJB12	chr10:72332829-72355230	Ctrl	siHIF1A	OK	11.2073	15.5849	0.475715	1.66425	5e-05	0.000604383	yes
ENSG00000148730.6	ENSG00000148730.6	EIF4EBP2	chr10:70404378-70428618	Ctrl	siHIF1A	OK	21.9293	16.7647	-0.387429	-1.60593	5e-05	0.000604383	yes
ENSG00000148908.13	ENSG00000148908.13	RGS10	chr10:119499827-119542708	Ctrl	siHIF1A	OK	18.8891	13.4584	-0.489052	-1.6368	5e-05	0.000604383	yes
ENSG00000148926.8	ENSG00000148926.8	ADM	chr11:10304679-10307397	Ctrl	siHIF1A	OK	128.208	85.5241	-0.584082	-2.16717	5e-05	0.000604383	yes
ENSG00000148943.10	ENSG00000148943.10	LIN7C	chr11:27494575-27506773	Ctrl	siHIF1A	OK	18.9888	12.8249	-0.566198	-2.28217	5e-05	0.000604383	yes
ENSG00000149150.7	ENSG00000149150.7	SLC43A1	chr11:57484533-57515786	Ctrl	siHIF1A	OK	8.65849	5.60413	-0.627625	-1.63994	5e-05	0.000604383	yes
ENSG00000149177.11	ENSG00000149177.11	PTPRJ	chr11:47980557-48170841	Ctrl	siHIF1A	OK	4.15928	2.72954	-0.607678	-1.61696	5e-05	0.000604383	yes
ENSG00000149218.4	ENSG00000149218.4	ENDOD1	chr11:95089809-95132645	Ctrl	siHIF1A	OK	8.24738	14.239	0.787838	3.13396	5e-05	0.000604383	yes
ENSG00000149257.12	ENSG00000149257.12	SERPINH1	chr11:75562055-75572783	Ctrl	siHIF1A	OK	168.83	252.05	0.578132	1.97382	5e-05	0.000604383	yes
ENSG00000149260.13	ENSG00000149260.13	CAPN5	chr11:77066931-77126155	Ctrl	siHIF1A	OK	7.63455	4.21282	-0.857758	-2.05472	5e-05	0.000604383	yes
ENSG00000149289.9	ENSG00000149289.9	ZC3H12C	chr11:110093360-110171841	Ctrl	siHIF1A	OK	9.56241	6.59505	-0.535991	-2.10712	5e-05	0.000604383	yes
ENSG00000149313.9	ENSG00000149313.9	AASDHPPT	chr11:106051097-106101975	Ctrl	siHIF1A	OK	22.7694	15.2949	-0.574045	-2.11002	5e-05	0.000604383	yes
ENSG00000149428.17	ENSG00000149428.17	HYOU1	chr11:119044187-119057202	Ctrl	siHIF1A	OK	69.8023	98.8543	0.502029	1.49989	5e-05	0.000604383	yes
ENSG00000149541.8	ENSG00000149541.8	B3GAT3	chr11:62615295-62622175	Ctrl	siHIF1A	OK	26.0817	17.4726	-0.577941	-1.97791	5e-05	0.000604383	yes
ENSG00000149573.7	ENSG00000149573.7	MPZL2	chr11:118253402-118264536	Ctrl	siHIF1A	OK	62.2355	123.062	0.983576	3.57743	5e-05	0.000604383	yes
ENSG00000149925.15	ENSG00000149925.15	ALDOA	chr16:30053089-30070457	Ctrl	siHIF1A	OK	847.711	504.226	-0.7495	-2.29666	5e-05	0.000604383	yes
ENSG00000149948.12	ENSG00000149948.12	HMGA2	chr12:65758019-65966295	Ctrl	siHIF1A	OK	18.7771	8.27106	-1.18283	-3.32018	5e-05	0.000604383	yes
ENSG00000150551.10	ENSG00000150551.10	LYPD1	chr2:132416573-132671579	Ctrl	siHIF1A	OK	31.6062	18.5678	-0.767403	-2.82982	5e-05	0.000604383	yes
ENSG00000150594.6	ENSG00000150594.6	ADRA2A	chr10:111077162-111080907	Ctrl	siHIF1A	OK	0.544575	0.123387	-2.14193	-2.76211	5e-05	0.000604383	yes
ENSG00000150712.9	ENSG00000150712.9	MTMR12	chr5:32226993-32313009	Ctrl	siHIF1A	OK	17.1884	10.8542	-0.663188	-1.9369	5e-05	0.000604383	yes
ENSG00000150990.6	ENSG00000150990.6	DHX37	chr12:124946824-124989122	Ctrl	siHIF1A	OK	4.17331	7.44609	0.835292	2.27438	5e-05	0.000604383	yes
ENSG00000151012.12	ENSG00000151012.12	SLC7A11	chr4:138027421-138242349	Ctrl	siHIF1A	OK	51.6131	36.8298	-0.486866	-1.53927	5e-05	0.000604383	yes
ENSG00000151062.13	ENSG00000151062.13	CACNA2D4	chr12:1791956-1922867	Ctrl	siHIF1A	OK	2.50727	0.695183	-1.85065	-1.68736	5e-05	0.000604383	yes
ENSG00000151151.5	ENSG00000151151.5	IPMK	chr10:58191516-58267934	Ctrl	siHIF1A	OK	7.17072	3.59223	-0.997238	-3.6597	5e-05	0.000604383	yes
ENSG00000151233.9	ENSG00000151233.9	GXYLT1	chr12:42081844-42144879	Ctrl	siHIF1A	OK	6.76248	10.8134	0.677199	1.95272	5e-05	0.000604383	yes
ENSG00000151414.13	ENSG00000151414.13	NEK7	chr1:198156962-198322420	Ctrl	siHIF1A	OK	35.0303	25.5302	-0.4564	-1.49738	5e-05	0.000604383	yes
ENSG00000151623.13	ENSG00000151623.13	NR3C2	chr4:148078761-148444698	Ctrl	siHIF1A	OK	4.0433	6.24173	0.626413	1.63701	5e-05	0.000604383	yes
ENSG00000151726.12	ENSG00000151726.12	ACSL1	chr4:184755594-184826818	Ctrl	siHIF1A	OK	14.4678	9.39132	-0.623448	-2.12373	5e-05	0.000604383	yes
ENSG00000151835.12	ENSG00000151835.12	SACS	chr13:23328822-23433728	Ctrl	siHIF1A	OK	21.7265	12.3562	-0.814223	-2.61611	5e-05	0.000604383	yes
ENSG00000152076.17	ENSG00000152076.17	CCDC74B	chr2:130129620-130145134	Ctrl	siHIF1A	OK	1.84235	0.674803	-1.44901	-1.99355	5e-05	0.000604383	yes
ENSG00000152117.16	ENSG00000152117.16	AC093838.4	chr2:131492812-131521573	Ctrl	siHIF1A	OK	9.09013	5.21045	-0.802893	-2.92194	5e-05	0.000604383	yes
ENSG00000152137.5	ENSG00000152137.5	HSPB8	chr12:119178641-119221131	Ctrl	siHIF1A	OK	9.96664	6.07178	-0.714989	-2.40997	5e-05	0.000604383	yes
ENSG00000152219.4	ENSG00000152219.4	ARL14EP	chr11:30323050-30338227	Ctrl	siHIF1A	OK	10.4063	7.01048	-0.569869	-1.65388	5e-05	0.000604383	yes
ENSG00000152229.17	ENSG00000152229.17	PSTPIP2	chr18:45983535-46072272	Ctrl	siHIF1A	OK	1.52151	0.71832	-1.0828	-1.79012	5e-05	0.000604383	yes
ENSG00000152332.14	ENSG00000152332.14	UHMK1	chr1:162497250-162529629	Ctrl	siHIF1A	OK	48.8419	26.8146	-0.865099	-3.5214	5e-05	0.000604383	yes
ENSG00000152749.7	ENSG00000152749.7	GPR180	chr13:94601902-94634645	Ctrl	siHIF1A	OK	8.05093	4.68916	-0.779825	-3.08058	5e-05	0.000604383	yes
ENSG00000152778.8	ENSG00000152778.8	IFIT5	chr10:89414585-89421001	Ctrl	siHIF1A	OK	4.34299	9.92096	1.19179	4.17556	5e-05	0.000604383	yes
ENSG00000152795.16	ENSG00000152795.16	HNRNPDL	chr4:82422563-82430408	Ctrl	siHIF1A	OK	66.7316	91.9013	0.461715	1.82558	5e-05	0.000604383	yes
ENSG00000152952.10	ENSG00000152952.10	PLOD2	chr3:146064041-146163653	Ctrl	siHIF1A	OK	239.191	124.227	-0.945184	-2.78638	5e-05	0.000604383	yes
ENSG00000152990.12	ENSG00000152990.12	GPR125	chr4:22345070-22516054	Ctrl	siHIF1A	OK	12.6296	8.72935	-0.532858	-1.33604	5e-05	0.000604383	yes
ENSG00000153214.8	ENSG00000153214.8	TMEM87B	chr2:112055222-112119318	Ctrl	siHIF1A	OK	36.6199	20.8936	-0.80957	-1.76232	5e-05	0.000604383	yes
ENSG00000153233.11	ENSG00000153233.11	PTPRR	chr12:70638072-70920843	Ctrl	siHIF1A	OK	3.3357	1.28197	-1.37963	-3.17774	5e-05	0.000604383	yes
ENSG00000153250.16	ENSG00000153250.16	RBMS1	chr2:160272150-160493794	Ctrl	siHIF1A	OK	46.5397	34.4456	-0.43414	-1.42181	5e-05	0.000604383	yes
ENSG00000153395.8	ENSG00000153395.8	LPCAT1	chr5:1456479-1523977	Ctrl	siHIF1A	OK	15.9888	23.1339	0.532949	1.91807	5e-05	0.000604383	yes
ENSG00000153561.11	ENSG00000153561.11	RMND5A	chr2:86503429-86778041	Ctrl	siHIF1A	OK	24.028	13.1677	-0.86771	-1.95167	5e-05	0.000604383	yes
ENSG00000153936.15	ENSG00000153936.15	HS2ST1	chr1:86914647-87169204	Ctrl	siHIF1A	OK	9.68967	15.9283	0.717071	2.29352	5e-05	0.000604383	yes
ENSG00000153993.12	ENSG00000153993.12	SEMA3D	chr7:84995552-85186855	Ctrl	siHIF1A	OK	0.934079	0.296793	-1.65409	-2.23842	5e-05	0.000604383	yes
ENSG00000154102.9	ENSG00000154102.9	C16orf74	chr16:85690083-85751129	Ctrl	siHIF1A	OK	10.4217	15.6396	0.585611	1.7944	5e-05	0.000604383	yes
ENSG00000154127.8	ENSG00000154127.8	UBASH3B	chr11:122655674-122814473	Ctrl	siHIF1A	OK	11.7892	7.58143	-0.636921	-1.54442	5e-05	0.000604383	yes
ENSG00000154134.13	ENSG00000154134.13	ROBO3	chr11:124865385-124881470	Ctrl	siHIF1A	OK	10.6787	6.51593	-0.712697	-1.70754	5e-05	0.000604383	yes
ENSG00000154146.11	ENSG00000154146.11	NRGN	chr11:124739845-124747210	Ctrl	siHIF1A	OK	12.5464	7.5574	-0.731314	-2.16526	5e-05	0.000604383	yes
ENSG00000154262.11	ENSG00000154262.11	ABCA6	chr17:69078701-69141888	Ctrl	siHIF1A	OK	15.0431	22.5547	0.584332	1.61618	5e-05	0.000604383	yes
ENSG00000154429.9	ENSG00000154429.9	CCSAP	chr1:229319402-229343294	Ctrl	siHIF1A	OK	2.67371	1.71759	-0.638458	-1.98685	5e-05	0.000604383	yes
ENSG00000154553.12	ENSG00000154553.12	PDLIM3	chr4:185500659-185535612	Ctrl	siHIF1A	OK	9.32985	4.15629	-1.16656	-3.25271	5e-05	0.000604383	yes
ENSG00000154639.17	ENSG00000154639.17	CXADR	chr21:17512381-17593579	Ctrl	siHIF1A	OK	6.41204	2.32383	-1.46428	-2.9799	5e-05	0.000604383	yes
ENSG00000154642.9	ENSG00000154642.9	C21orf91	chr21:17763314-17819386	Ctrl	siHIF1A	OK	3.76357	2.34565	-0.682113	-1.58062	5e-05	0.000604383	yes
ENSG00000154813.8	ENSG00000154813.8	DPH3	chr3:16257977-16264972	Ctrl	siHIF1A	OK	8.67818	15.2024	0.808834	2.47386	5e-05	0.000604383	yes
ENSG00000154822.14	ENSG00000154822.14	PLCL2	chr3:16802650-17090594	Ctrl	siHIF1A	OK	2.88657	4.55319	0.65752	2.26252	5e-05	0.000604383	yes
ENSG00000154957.12	ENSG00000154957.12	ZNF18	chr17:11598430-11997510	Ctrl	siHIF1A	OK	1.47085	2.81523	0.936604	1.8916	5e-05	0.000604383	yes
ENSG00000154978.11	ENSG00000154978.11	VOPP1	chr7:55436055-55572988	Ctrl	siHIF1A	OK	37.2536	66.0977	0.827223	3.09751	5e-05	0.000604383	yes
ENSG00000155093.16	ENSG00000155093.16	PTPRN2	chr7:157539055-158587788	Ctrl	siHIF1A	OK	0.993582	0.532214	-0.900633	-2.13419	5e-05	0.000604383	yes
ENSG00000155189.10	ENSG00000155189.10	AGPAT5	chr8:6708356-6759666	Ctrl	siHIF1A	OK	54.829	35.786	-0.615546	-2.19422	5e-05	0.000604383	yes
ENSG00000155254.11	ENSG00000155254.11	MARVELD1	chr10:97713172-97718152	Ctrl	siHIF1A	OK	21.43	28.411	0.406819	1.56988	5e-05	0.000604383	yes
ENSG00000155287.9	ENSG00000155287.9	SLC25A28	chr10:99610521-99620609	Ctrl	siHIF1A	OK	13.4903	20.388	0.595798	1.77591	5e-05	0.000604383	yes
ENSG00000155307.16	ENSG00000155307.16	SAMSN1	chr21:14485227-14658821	Ctrl	siHIF1A	OK	3.80721	2.40401	-0.663292	-1.75162	5e-05	0.000604383	yes
ENSG00000155463.11	ENSG00000155463.11	OXA1L	chr14:22702142-22773041	Ctrl	siHIF1A	OK	108.367	79.0147	-0.455732	-1.74656	5e-05	0.000604383	yes
ENSG00000155640.6	ENSG00000155640.6	C10orf12	chr10:96981283-96986212	Ctrl	siHIF1A	OK	1.9462	3.10038	0.671788	2.34604	5e-05	0.000604383	yes
ENSG00000155660.9	ENSG00000155660.9	PDIA4	chr7:149003061-149028641	Ctrl	siHIF1A	OK	146.392	202.802	0.470233	1.76443	5e-05	0.000604383	yes
ENSG00000155858.5	ENSG00000155858.5	LSM11	chr5:157743694-157760709	Ctrl	siHIF1A	OK	6.33314	2.94721	-1.10357	-4.07799	5e-05	0.000604383	yes
ENSG00000155959.9	ENSG00000155959.9	VBP1	chrX:155197006-155239817	Ctrl	siHIF1A	OK	27.5792	14.0493	-0.973084	-3.63721	5e-05	0.000604383	yes
ENSG00000156030.11	ENSG00000156030.11	ELMSAN1	chr14:73715121-73803270	Ctrl	siHIF1A	OK	20.3951	11.4857	-0.82838	-2.09179	5e-05	0.000604383	yes
ENSG00000156140.7	ENSG00000156140.7	ADAMTS3	chr4:72280968-72568799	Ctrl	siHIF1A	OK	0.641096	0.250936	-1.35322	-1.9275	5e-05	0.000604383	yes
ENSG00000156172.5	ENSG00000156172.5	C8orf37	chr8:95204455-95810136	Ctrl	siHIF1A	OK	1.32532	0.7456	-0.829868	-1.98606	5e-05	0.000604383	yes
ENSG00000156374.13	ENSG00000156374.13	PCGF6	chr10:103302795-103351134	Ctrl	siHIF1A	OK	3.68178	5.44584	0.564751	1.61635	5e-05	0.000604383	yes
ENSG00000156453.12	ENSG00000156453.12	PCDH1	chr5:141853110-141879246	Ctrl	siHIF1A	OK	34.9823	46.8363	0.421004	1.69066	5e-05	0.000604383	yes
ENSG00000156463.16	ENSG00000156463.16	SH3RF2	chr5:145936578-146081791	Ctrl	siHIF1A	OK	0.819956	0.274485	-1.57882	-1.19448	5e-05	0.000604383	yes
ENSG00000156466.9	ENSG00000156466.9	GDF6	chr8:96142329-96160792	Ctrl	siHIF1A	OK	13.939	25.945	0.896336	3.58238	5e-05	0.000604383	yes
ENSG00000156504.15	ENSG00000156504.15	FAM122B	chrX:134769565-134854610	Ctrl	siHIF1A	OK	3.93807	2.38281	-0.724822	-1.90133	5e-05	0.000604383	yes
ENSG00000156515.20	ENSG00000156515.20	HK1	chr10:69269983-69401882	Ctrl	siHIF1A	OK	57.7581	42.2782	-0.450109	-1.66822	5e-05	0.000604383	yes
ENSG00000156535.12	ENSG00000156535.12	CD109	chr6:73693902-73828316	Ctrl	siHIF1A	OK	43.2662	26.5754	-0.703149	-2.66407	5e-05	0.000604383	yes
ENSG00000156587.14	ENSG00000156587.14	UBE2L6	chr11:57551655-57568284	Ctrl	siHIF1A	OK	35.7148	79.8751	1.16122	4.55261	5e-05	0.000604383	yes
ENSG00000156603.13	ENSG00000156603.13	MED19	chr11:57703713-57712221	Ctrl	siHIF1A	OK	10.7757	15.6422	0.537654	1.77966	5e-05	0.000604383	yes
ENSG00000156671.11	ENSG00000156671.11	SAMD8	chr10:75094431-75182123	Ctrl	siHIF1A	OK	13.3669	9.51724	-0.490053	-1.52976	5e-05	0.000604383	yes
ENSG00000156711.15	ENSG00000156711.15	MAPK13	chr6:36127808-36144524	Ctrl	siHIF1A	OK	3.09235	0.967996	-1.67563	-2.77259	5e-05	0.000604383	yes
ENSG00000156795.5	ENSG00000156795.5	WDYHV1	chr8:123416724-123467230	Ctrl	siHIF1A	OK	6.04195	3.79641	-0.670376	-1.57459	5e-05	0.000604383	yes
ENSG00000157601.12	ENSG00000157601.12	MX1	chr21:41420303-41459214	Ctrl	siHIF1A	OK	22.7165	161.416	2.82897	7.05867	5e-05	0.000604383	yes
ENSG00000157954.13	ENSG00000157954.13	WIPI2	chr7:5190187-5233826	Ctrl	siHIF1A	OK	26.8995	40.5929	0.593647	2.17653	5e-05	0.000604383	yes
ENSG00000158201.8	ENSG00000158201.8	ABHD3	chr18:21650896-21704805	Ctrl	siHIF1A	OK	7.06183	4.11184	-0.780258	-2.00123	5e-05	0.000604383	yes
ENSG00000158246.7	ENSG00000158246.7	FAM46B	chr1:27005019-27012836	Ctrl	siHIF1A	OK	0.623034	0.258975	-1.2665	-1.9498	5e-05	0.000604383	yes
ENSG00000158270.11	ENSG00000158270.11	COLEC12	chr18:316736-500722	Ctrl	siHIF1A	OK	10.9117	6.57661	-0.730456	-2.79367	5e-05	0.000604383	yes
ENSG00000158292.6	ENSG00000158292.6	GPR153	chr1:6247345-6260975	Ctrl	siHIF1A	OK	3.18447	1.9682	-0.694177	-2.08384	5e-05	0.000604383	yes
ENSG00000158373.8	ENSG00000158373.8	HIST1H2BD	chr6:26158145-26171349	Ctrl	siHIF1A	OK	104.851	68.6984	-0.609991	-2.28867	5e-05	0.000604383	yes
ENSG00000158406.3	ENSG00000158406.3	HIST1H4H	chr6:26285112-26285509	Ctrl	siHIF1A	OK	98.521	66.6769	-0.563245	-2.0418	5e-05	0.000604383	yes
ENSG00000158615.8	ENSG00000158615.8	PPP1R15B	chr1:204377849-204494724	Ctrl	siHIF1A	OK	21.2245	12.8396	-0.72513	-1.92257	5e-05	0.000604383	yes
ENSG00000158966.12	ENSG00000158966.12	CACHD1	chr1:64470791-64693058	Ctrl	siHIF1A	OK	2.11742	1.27809	-0.728316	-1.92572	5e-05	0.000604383	yes
ENSG00000159164.8	ENSG00000159164.8	SV2A	chr1:149903317-149917882	Ctrl	siHIF1A	OK	1.08513	0.447955	-1.27644	-2.74112	5e-05	0.000604383	yes
ENSG00000159167.10	ENSG00000159167.10	STC1	chr8:23841914-23854807	Ctrl	siHIF1A	OK	9.95821	4.49424	-1.14781	-3.85496	5e-05	0.000604383	yes
ENSG00000159200.16	ENSG00000159200.16	RCAN1	chr21:34513141-34615142	Ctrl	siHIF1A	OK	5.83261	8.048	0.464488	1.54446	5e-05	0.000604383	yes
ENSG00000159216.17	ENSG00000159216.17	RUNX1	chr21:34787800-36004667	Ctrl	siHIF1A	OK	2.693	1.41667	-0.926715	-1.56967	5e-05	0.000604383	yes
ENSG00000159261.9	ENSG00000159261.9	CLDN14	chr21:36430359-36576569	Ctrl	siHIF1A	OK	17.3761	5.62345	-1.62758	-3.24805	5e-05	0.000604383	yes
ENSG00000159388.5	ENSG00000159388.5	BTG2	chr1:203305490-203309602	Ctrl	siHIF1A	OK	33.9264	62.2173	0.874907	3.46226	5e-05	0.000604383	yes
ENSG00000159399.8	ENSG00000159399.8	HK2	chr2:74832654-74893359	Ctrl	siHIF1A	OK	5.23482	1.60464	-1.70589	-3.92128	5e-05	0.000604383	yes
ENSG00000159720.10	ENSG00000159720.10	ATP6V0D1	chr16:67438013-67481237	Ctrl	siHIF1A	OK	56.4534	79.22	0.488805	1.93883	5e-05	0.000604383	yes
ENSG00000160058.17	ENSG00000160058.17	BSDC1	chr1:32365102-32394731	Ctrl	siHIF1A	OK	24.0402	34.7622	0.532071	1.72255	5e-05	0.000604383	yes
ENSG00000160075.11	ENSG00000160075.11	SSU72	chr1:1541672-1574869	Ctrl	siHIF1A	OK	37.8405	50.3767	0.412828	1.56444	5e-05	0.000604383	yes
ENSG00000160145.14	ENSG00000160145.14	KALRN	chr3:124080022-124726325	Ctrl	siHIF1A	OK	4.63492	8.66166	0.9021	1.67254	5e-05	0.000604383	yes
ENSG00000160209.17	ENSG00000160209.17	PDXK	chr21:43719093-43762307	Ctrl	siHIF1A	OK	30.091	15.7238	-0.936386	-2.11642	5e-05	0.000604383	yes
ENSG00000160223.15	ENSG00000160223.15	ICOSLG	chr21:44222990-44240966	Ctrl	siHIF1A	OK	0.811326	0.364271	-1.15527	-2.36289	5e-05	0.000604383	yes
ENSG00000160326.12	ENSG00000160326.12	SLC2A6	chr9:133471094-133479137	Ctrl	siHIF1A	OK	23.5673	15.5386	-0.600928	-1.93607	5e-05	0.000604383	yes
ENSG00000160445.9	ENSG00000160445.9	ZER1	chr9:128724444-128772414	Ctrl	siHIF1A	OK	7.21739	10.7549	0.575443	1.42748	5e-05	0.000604383	yes
ENSG00000160691.17	ENSG00000160691.17	SHC1	chr1:154957025-154974395	Ctrl	siHIF1A	OK	170.564	120.778	-0.497947	-1.69581	5e-05	0.000604383	yes
ENSG00000160710.14	ENSG00000160710.14	ADAR	chr1:154582061-154627999	Ctrl	siHIF1A	OK	48.3708	75.4707	0.641779	1.51202	5e-05	0.000604383	yes
ENSG00000160752.13	ENSG00000160752.13	FDPS	chr1:155308747-155331114	Ctrl	siHIF1A	OK	68.0556	105.858	0.637342	1.96929	5e-05	0.000604383	yes
ENSG00000160932.9	ENSG00000160932.9	LY6E	chr8:142981737-143023832	Ctrl	siHIF1A	OK	55.8971	140.712	1.3319	4.87862	5e-05	0.000604383	yes
ENSG00000161281.9	ENSG00000161281.9	COX7A1	chr19:36150921-36152869	Ctrl	siHIF1A	OK	14.2328	38.7588	1.44531	3.74258	5e-05	0.000604383	yes
ENSG00000161798.6	ENSG00000161798.6	AQP5	chr12:49950740-49965681	Ctrl	siHIF1A	OK	1.41839	0.570761	-1.3133	-2.03579	5e-05	0.000604383	yes
ENSG00000161920.8	ENSG00000161920.8	MED11	chr17:4731427-4739922	Ctrl	siHIF1A	OK	3.04682	9.90761	1.70123	2.25027	5e-05	0.000604383	yes
ENSG00000161921.13	ENSG00000161921.13	CXCL16	chr17:4731427-4739922	Ctrl	siHIF1A	OK	6.6758	13.575	1.02394	2.83057	5e-05	0.000604383	yes
ENSG00000161958.9	ENSG00000161958.9	FGF11	chr17:7420102-7457707	Ctrl	siHIF1A	OK	2.3986	0.676482	-1.82607	-1.76881	5e-05	0.000604383	yes
ENSG00000162104.8	ENSG00000162104.8	ADCY9	chr16:3953386-4116185	Ctrl	siHIF1A	OK	2.33085	4.04091	0.793823	1.83218	5e-05	0.000604383	yes
ENSG00000162407.8	ENSG00000162407.8	PPAP2B	chr1:56494746-56645301	Ctrl	siHIF1A	OK	12.4186	18.1204	0.545112	2.13573	5e-05	0.000604383	yes
ENSG00000162413.15	ENSG00000162413.15	KLHL21	chr1:6590723-6624033	Ctrl	siHIF1A	OK	12.2414	18.4119	0.588863	1.85172	5e-05	0.000604383	yes
ENSG00000162433.13	ENSG00000162433.13	AK4	chr1:65147548-65232145	Ctrl	siHIF1A	OK	15.8108	3.88175	-2.02613	-5.45684	5e-05	0.000604383	yes
ENSG00000162511.7	ENSG00000162511.7	LAPTM5	chr1:30732468-30757820	Ctrl	siHIF1A	OK	23.4405	10.0484	-1.22204	-4.61226	5e-05	0.000604383	yes
ENSG00000162522.9	ENSG00000162522.9	KIAA1522	chr1:32741884-32774970	Ctrl	siHIF1A	OK	4.04415	6.13168	0.600445	1.76957	5e-05	0.000604383	yes
ENSG00000162545.5	ENSG00000162545.5	CAMK2N1	chr1:20482390-20486220	Ctrl	siHIF1A	OK	5.60588	2.99699	-0.903426	-2.50334	5e-05	0.000604383	yes
ENSG00000162591.14	ENSG00000162591.14	MEGF6	chr1:3489919-3611495	Ctrl	siHIF1A	OK	23.1438	41.6566	0.847917	1.73111	5e-05	0.000604383	yes
ENSG00000162618.11	ENSG00000162618.11	ELTD1	chr1:78889763-79006718	Ctrl	siHIF1A	OK	119.607	80.5415	-0.570503	-1.87159	5e-05	0.000604383	yes
ENSG00000162692.9	ENSG00000162692.9	VCAM1	chr1:100719741-100739045	Ctrl	siHIF1A	OK	5.16892	1.46504	-1.81893	-5.49653	5e-05	0.000604383	yes
ENSG00000162729.12	ENSG00000162729.12	IGSF8	chr1:160091339-160098943	Ctrl	siHIF1A	OK	8.55179	5.78777	-0.563218	-1.86137	5e-05	0.000604383	yes
ENSG00000162746.13	ENSG00000162746.13	FCRLB	chr1:161721562-161728143	Ctrl	siHIF1A	OK	0.962076	0.330801	-1.54019	-1.66118	5e-05	0.000604383	yes
ENSG00000162817.6	ENSG00000162817.6	C1orf115	chr1:220689844-220699157	Ctrl	siHIF1A	OK	11.3533	17.2708	0.605216	2.41506	5e-05	0.000604383	yes
ENSG00000163001.10	ENSG00000163001.10	CFAP36	chr2:55519603-55545879	Ctrl	siHIF1A	OK	11.2169	17.6796	0.656405	1.98871	5e-05	0.000604383	yes
ENSG00000163040.13	ENSG00000163040.13	CCDC74A	chr2:131527674-131533666	Ctrl	siHIF1A	OK	5.68663	2.08769	-1.44567	-3.24732	5e-05	0.000604383	yes
ENSG00000163071.9	ENSG00000163071.9	SPATA18	chr4:52051330-52097292	Ctrl	siHIF1A	OK	6.61907	10.9645	0.728145	1.99447	5e-05	0.000604383	yes
ENSG00000163083.5	ENSG00000163083.5	INHBB	chr2:120346142-120351808	Ctrl	siHIF1A	OK	0.293339	0.887464	1.59712	2.90161	5e-05	0.000604383	yes
ENSG00000163131.9	ENSG00000163131.9	CTSS	chr1:150730195-150765957	Ctrl	siHIF1A	OK	18.1364	9.86521	-0.878467	-2.18795	5e-05	0.000604383	yes
ENSG00000163170.10	ENSG00000163170.10	BOLA3	chr2:74135397-74147994	Ctrl	siHIF1A	OK	15.6437	23.5343	0.589185	1.74952	5e-05	0.000604383	yes
ENSG00000163344.5	ENSG00000163344.5	PMVK	chr1:154924733-154936991	Ctrl	siHIF1A	OK	5.6116	9.27012	0.724176	2.27237	5e-05	0.000604383	yes
ENSG00000163428.3	ENSG00000163428.3	LRRC58	chr3:120324508-120349339	Ctrl	siHIF1A	OK	6.96555	3.8843	-0.842582	-3.27296	5e-05	0.000604383	yes
ENSG00000163513.16	ENSG00000163513.16	TGFBR2	chr3:30606501-30694142	Ctrl	siHIF1A	OK	196.472	111.654	-0.815283	-3.02474	5e-05	0.000604383	yes
ENSG00000163536.11	ENSG00000163536.11	SERPINI1	chr3:167735242-167825568	Ctrl	siHIF1A	OK	0.27823	0.979166	1.81528	1.24113	5e-05	0.000604383	yes
ENSG00000163545.7	ENSG00000163545.7	NUAK2	chr1:205302058-205321755	Ctrl	siHIF1A	OK	1.27132	0.668784	-0.926717	-2.17304	5e-05	0.000604383	yes
ENSG00000163565.17	ENSG00000163565.17	IFI16	chr1:158999967-159055155	Ctrl	siHIF1A	OK	58.4979	113.736	0.959228	2.90284	5e-05	0.000604383	yes
ENSG00000163602.9	ENSG00000163602.9	RYBP	chr3:72371824-72446918	Ctrl	siHIF1A	OK	4.66117	3.37285	-0.466724	-1.78273	5e-05	0.000604383	yes
ENSG00000163634.10	ENSG00000163634.10	THOC7	chr3:63742292-63863903	Ctrl	siHIF1A	OK	20.5904	29.4418	0.515896	1.82063	5e-05	0.000604383	yes
ENSG00000163682.14	ENSG00000163682.14	RPL9	chr4:39454123-39458948	Ctrl	siHIF1A	OK	805.262	600.271	-0.423843	-1.63463	5e-05	0.000604383	yes
ENSG00000163735.6	ENSG00000163735.6	CXCL5	chr4:73995641-73998779	Ctrl	siHIF1A	OK	0.92384	0.213011	-2.11672	-2.99382	5e-05	0.000604383	yes
ENSG00000163814.6	ENSG00000163814.6	CDCP1	chr3:45082277-45146422	Ctrl	siHIF1A	OK	1.97945	0.501518	-1.98073	-3.64093	5e-05	0.000604383	yes
ENSG00000163840.8	ENSG00000163840.8	DTX3L	chr3:122527923-122575203	Ctrl	siHIF1A	OK	12.6541	26.0515	1.04176	3.0683	5e-05	0.000604383	yes
ENSG00000163923.8	ENSG00000163923.8	RPL39L	chr3:187120947-187180908	Ctrl	siHIF1A	OK	7.5549	4.4163	-0.774575	-1.92977	5e-05	0.000604383	yes
ENSG00000163961.4	ENSG00000163961.4	RNF168	chr3:196468782-196503768	Ctrl	siHIF1A	OK	7.82141	5.55714	-0.493086	-1.92544	5e-05	0.000604383	yes
ENSG00000164054.14	ENSG00000164054.14	SHISA5	chr3:48467797-48504826	Ctrl	siHIF1A	OK	112.293	148.339	0.401627	1.59944	5e-05	0.000604383	yes
ENSG00000164056.9	ENSG00000164056.9	SPRY1	chr4:123396794-123403760	Ctrl	siHIF1A	OK	12.2407	27.2944	1.15692	3.12776	5e-05	0.000604383	yes
ENSG00000164171.9	ENSG00000164171.9	ITGA2	chr5:52675192-53094779	Ctrl	siHIF1A	OK	62.8423	45.7893	-0.456726	-1.698	5e-05	0.000604383	yes
ENSG00000164236.10	ENSG00000164236.10	ANKRD33B	chr5:10564329-10657816	Ctrl	siHIF1A	OK	2.19003	3.66488	0.742815	2.34912	5e-05	0.000604383	yes
ENSG00000164283.11	ENSG00000164283.11	ESM1	chr5:54977863-55042844	Ctrl	siHIF1A	OK	252.869	155.263	-0.703679	-2.63109	5e-05	0.000604383	yes
ENSG00000164284.13	ENSG00000164284.13	GRPEL2	chr5:149345429-149357642	Ctrl	siHIF1A	OK	20.9176	13.0772	-0.677662	-2.54978	5e-05	0.000604383	yes
ENSG00000164292.11	ENSG00000164292.11	RHOBTB3	chr5:95701248-95824383	Ctrl	siHIF1A	OK	39.0732	22.6041	-0.789592	-1.94744	5e-05	0.000604383	yes
ENSG00000164300.14	ENSG00000164300.14	SERINC5	chr5:80111650-80256079	Ctrl	siHIF1A	OK	5.52876	3.65188	-0.598319	-1.45612	5e-05	0.000604383	yes
ENSG00000164305.16	ENSG00000164305.16	CASP3	chr4:184627695-184649509	Ctrl	siHIF1A	OK	47.5825	30.8128	-0.626902	-2.47444	5e-05	0.000604383	yes
ENSG00000164342.11	ENSG00000164342.11	TLR3	chr4:186069151-186088069	Ctrl	siHIF1A	OK	3.18082	6.07459	0.933389	2.23967	5e-05	0.000604383	yes
ENSG00000164430.14	ENSG00000164430.14	MB21D1	chr6:73368554-73452276	Ctrl	siHIF1A	OK	2.23926	1.22348	-0.87203	-2.03583	5e-05	0.000604383	yes
ENSG00000164442.9	ENSG00000164442.9	CITED2	chr6:139371806-139374620	Ctrl	siHIF1A	OK	13.0414	20.1565	0.628144	2.1156	5e-05	0.000604383	yes
ENSG00000164543.5	ENSG00000164543.5	STK17A	chr7:43582757-43729717	Ctrl	siHIF1A	OK	24.6841	40.6177	0.718528	1.94501	5e-05	0.000604383	yes
ENSG00000164603.10	ENSG00000164603.10	C7orf60	chr7:112819146-112939916	Ctrl	siHIF1A	OK	7.49977	4.80174	-0.643289	-2.16866	5e-05	0.000604383	yes
ENSG00000164611.11	ENSG00000164611.11	PTTG1	chr5:160421821-160428744	Ctrl	siHIF1A	OK	29.8153	14.6253	-1.02758	-3.51227	5e-05	0.000604383	yes
ENSG00000164615.4	ENSG00000164615.4	CAMLG	chr5:134738500-134752160	Ctrl	siHIF1A	OK	26.0699	37.8302	0.537151	1.72049	5e-05	0.000604383	yes
ENSG00000164683.15	ENSG00000164683.15	HEY1	chr8:79764009-79767863	Ctrl	siHIF1A	OK	2.39229	0.831247	-1.52505	-2.40936	5e-05	0.000604383	yes
ENSG00000164692.16	ENSG00000164692.16	COL1A2	chr7:94394560-94431232	Ctrl	siHIF1A	OK	2.41323	7.35135	1.60704	3.33497	5e-05	0.000604383	yes
ENSG00000164736.5	ENSG00000164736.5	SOX17	chr8:54457934-54460888	Ctrl	siHIF1A	OK	32.3168	18.3493	-0.816562	-3.18311	5e-05	0.000604383	yes
ENSG00000164938.12	ENSG00000164938.12	TP53INP1	chr8:94813310-95116455	Ctrl	siHIF1A	OK	35.4679	24.5052	-0.533426	-1.66292	5e-05	0.000604383	yes
ENSG00000164951.14	ENSG00000164951.14	PDP1	chr8:93857806-93926066	Ctrl	siHIF1A	OK	27.1727	40.4581	0.57427	2.12139	5e-05	0.000604383	yes
ENSG00000164976.8	ENSG00000164976.8	KIAA1161	chr9:34366669-34376853	Ctrl	siHIF1A	OK	2.85682	4.58217	0.681618	1.89669	5e-05	0.000604383	yes
ENSG00000165071.13	ENSG00000165071.13	TMEM71	chr8:132685006-132760712	Ctrl	siHIF1A	OK	2.30288	0.695601	-1.72711	-1.97437	5e-05	0.000604383	yes
ENSG00000165092.11	ENSG00000165092.11	ALDH1A1	chr9:72900661-73080442	Ctrl	siHIF1A	OK	49.8935	87.4814	0.810126	3.1583	5e-05	0.000604383	yes
ENSG00000165288.10	ENSG00000165288.10	BRWD3	chrX:80670853-80809688	Ctrl	siHIF1A	OK	5.84838	2.86186	-1.03108	-2.50616	5e-05	0.000604383	yes
ENSG00000165304.6	ENSG00000165304.6	MELK	chr9:36572861-36677683	Ctrl	siHIF1A	OK	5.65443	3.50191	-0.691238	-1.96637	5e-05	0.000604383	yes
ENSG00000165417.10	ENSG00000165417.10	GTF2A1	chr14:81175451-81222460	Ctrl	siHIF1A	OK	9.51286	6.51632	-0.545821	-2.02822	5e-05	0.000604383	yes
ENSG00000165424.6	ENSG00000165424.6	ZCCHC24	chr10:79382324-79445627	Ctrl	siHIF1A	OK	2.38777	5.58729	1.22648	4.21317	5e-05	0.000604383	yes
ENSG00000165507.8	ENSG00000165507.8	C10orf10	chr10:44811023-44995891	Ctrl	siHIF1A	OK	335.584	215.846	-0.636673	-2.28533	5e-05	0.000604383	yes
ENSG00000165644.9	ENSG00000165644.9	COMTD1	chr10:75233968-75236030	Ctrl	siHIF1A	OK	3.88932	6.98931	0.845634	1.83474	5e-05	0.000604383	yes
ENSG00000165672.6	ENSG00000165672.6	PRDX3	chr10:119167702-119178833	Ctrl	siHIF1A	OK	94.933	62.4782	-0.603556	-2.45654	5e-05	0.000604383	yes
ENSG00000165704.13	ENSG00000165704.13	HPRT1	chrX:134460152-134520513	Ctrl	siHIF1A	OK	12.7246	8.0425	-0.6619	-2.19146	5e-05	0.000604383	yes
ENSG00000165716.8	ENSG00000165716.8	FAM69B	chr9:136712569-136728184	Ctrl	siHIF1A	OK	101.115	60.4949	-0.741107	-2.34882	5e-05	0.000604383	yes
ENSG00000165757.8	ENSG00000165757.8	KIAA1462	chr10:30012799-30115494	Ctrl	siHIF1A	OK	28.6026	16.9553	-0.754413	-2.80262	5e-05	0.000604383	yes
ENSG00000165801.8	ENSG00000165801.8	ARHGEF40	chr14:21016762-21104722	Ctrl	siHIF1A	OK	5.38037	1.81672	-1.56637	-2.47276	5e-05	0.000604383	yes
ENSG00000165802.18	ENSG00000165802.18	NSMF	chr9:137447569-137459334	Ctrl	siHIF1A	OK	18.4988	13.1559	-0.491724	-1.64553	5e-05	0.000604383	yes
ENSG00000165806.18	ENSG00000165806.18	CASP7	chr10:113679161-113730907	Ctrl	siHIF1A	OK	12.655	30.9498	1.29022	4.95965	5e-05	0.000604383	yes
ENSG00000165916.7	ENSG00000165916.7	PSMC3	chr11:47418768-47426473	Ctrl	siHIF1A	OK	30.8065	43.2748	0.490292	1.94213	5e-05	0.000604383	yes
ENSG00000165949.11	ENSG00000165949.11	IFI27	chr14:94104835-94116698	Ctrl	siHIF1A	OK	1169.5	2712.63	1.2138	3.88196	5e-05	0.000604383	yes
ENSG00000165959.10	ENSG00000165959.10	CLMN	chr14:95181939-95319906	Ctrl	siHIF1A	OK	4.2391	2.00296	-1.08162	-1.74188	5e-05	0.000604383	yes
ENSG00000165983.13	ENSG00000165983.13	PTER	chr10:16436942-16522005	Ctrl	siHIF1A	OK	3.65679	1.9047	-0.941012	-2.31158	5e-05	0.000604383	yes
ENSG00000165997.4	ENSG00000165997.4	ARL5B	chr10:18659404-18681639	Ctrl	siHIF1A	OK	17.6965	5.07396	-1.80228	-7.15629	5e-05	0.000604383	yes
ENSG00000166068.11	ENSG00000166068.11	SPRED1	chr15:38252325-38357249	Ctrl	siHIF1A	OK	9.94943	6.42473	-0.630978	-1.87316	5e-05	0.000604383	yes
ENSG00000166147.12	ENSG00000166147.12	FBN1	chr15:48408305-48645849	Ctrl	siHIF1A	OK	31.4723	59.2629	0.913045	2.77063	5e-05	0.000604383	yes
ENSG00000166164.14	ENSG00000166164.14	BRD7	chr16:50246136-50371480	Ctrl	siHIF1A	OK	14.7903	22.0415	0.575574	1.84077	5e-05	0.000604383	yes
ENSG00000166165.11	ENSG00000166165.11	CKB	chr14:103519658-103523111	Ctrl	siHIF1A	OK	2.30791	0.905055	-1.35051	-1.2022	5e-05	0.000604383	yes
ENSG00000166181.11	ENSG00000166181.11	API5	chr11:43311962-43494933	Ctrl	siHIF1A	OK	27.3863	16.7932	-0.705579	-1.21509	5e-05	0.000604383	yes
ENSG00000166197.15	ENSG00000166197.15	NOLC1	chr10:102152175-102163871	Ctrl	siHIF1A	OK	5.6146	13.5357	1.26951	4.761	5e-05	0.000604383	yes
ENSG00000166228.7	ENSG00000166228.7	PCBD1	chr10:70882279-70888784	Ctrl	siHIF1A	OK	39.4449	25.2785	-0.641927	-2.1508	5e-05	0.000604383	yes
ENSG00000166341.7	ENSG00000166341.7	DCHS1	chr11:6621322-6655854	Ctrl	siHIF1A	OK	18.3677	8.17167	-1.16847	-4.53479	5e-05	0.000604383	yes
ENSG00000166394.13	ENSG00000166394.13	CYB5R2	chr11:7665099-7677222	Ctrl	siHIF1A	OK	1.18072	0.119789	-3.30109	-0.951219	5e-05	0.000604383	yes
ENSG00000166479.8	ENSG00000166479.8	TMX3	chr18:68673687-69055189	Ctrl	siHIF1A	OK	27.5441	39.5101	0.520478	1.38386	5e-05	0.000604383	yes
ENSG00000166562.7	ENSG00000166562.7	SEC11C	chr18:59139476-59158836	Ctrl	siHIF1A	OK	13.8083	21.7927	0.658317	1.73897	5e-05	0.000604383	yes
ENSG00000166598.11	ENSG00000166598.11	HSP90B1	chr12:103841450-103965708	Ctrl	siHIF1A	OK	382.221	569.887	0.576269	1.59982	5e-05	0.000604383	yes
ENSG00000166710.16	ENSG00000166710.16	B2M	chr15:44711476-44718877	Ctrl	siHIF1A	OK	2122.78	3848.44	0.85832	2.14958	5e-05	0.000604383	yes
ENSG00000166750.8	ENSG00000166750.8	SLFN5	chr17:35243035-35273655	Ctrl	siHIF1A	OK	10.7839	6.69461	-0.687807	-1.82523	5e-05	0.000604383	yes
ENSG00000166825.12	ENSG00000166825.12	ANPEP	chr15:89784888-89815401	Ctrl	siHIF1A	OK	64.3314	105.862	0.718588	1.96851	5e-05	0.000604383	yes
ENSG00000166851.13	ENSG00000166851.13	PLK1	chr16:23677655-23713500	Ctrl	siHIF1A	OK	6.62321	3.27558	-1.01578	-2.64782	5e-05	0.000604383	yes
ENSG00000166963.11	ENSG00000166963.11	MAP1A	chr15:43510957-43531620	Ctrl	siHIF1A	OK	0.515796	0.31815	-0.697096	-1.9366	5e-05	0.000604383	yes
ENSG00000167100.13	ENSG00000167100.13	SAMD14	chr17:50094736-50129882	Ctrl	siHIF1A	OK	8.65806	4.86536	-0.831498	-1.5602	5e-05	0.000604383	yes
ENSG00000167110.15	ENSG00000167110.15	GOLGA2	chr9:128255828-128288990	Ctrl	siHIF1A	OK	20.3861	40.4546	0.98872	2.20479	5e-05	0.000604383	yes
ENSG00000167114.11	ENSG00000167114.11	SLC27A4	chr9:128340645-128361470	Ctrl	siHIF1A	OK	10.9469	14.8748	0.442349	1.63396	5e-05	0.000604383	yes
ENSG00000167272.9	ENSG00000167272.9	POP5	chr12:120578763-120581398	Ctrl	siHIF1A	OK	11.9506	19.0024	0.669101	1.97318	5e-05	0.000604383	yes
ENSG00000167306.17	ENSG00000167306.17	MYO5B	chr18:49782166-50195093	Ctrl	siHIF1A	OK	2.07195	0.296887	-2.803	-1.37497	5e-05	0.000604383	yes
ENSG00000167460.13	ENSG00000167460.13	TPM4	chr19:16067020-16103005	Ctrl	siHIF1A	OK	124.983	253.115	1.01807	2.64515	5e-05	0.000604383	yes
ENSG00000167536.12	ENSG00000167536.12	DHRS13	chr17:28897737-28903071	Ctrl	siHIF1A	OK	3.21909	1.84796	-0.800718	-1.76677	5e-05	0.000604383	yes
ENSG00000167642.11	ENSG00000167642.11	SPINT2	chr19:38244034-38305009	Ctrl	siHIF1A	OK	0.627959	1.83156	1.54433	1.19498	5e-05	0.000604383	yes
ENSG00000167644.10	ENSG00000167644.10	C19orf33	chr19:38244034-38305009	Ctrl	siHIF1A	OK	6.05429	27.5805	2.18762	4.88311	5e-05	0.000604383	yes
ENSG00000167674.13	ENSG00000167674.13	HDGFRP2	chr19:4472286-4517704	Ctrl	siHIF1A	OK	17.1743	32.3209	0.912217	3.16064	5e-05	0.000604383	yes
ENSG00000167695.13	ENSG00000167695.13	FAM57A	chr17:732411-742972	Ctrl	siHIF1A	OK	18.0148	11.2322	-0.681541	-2.21756	5e-05	0.000604383	yes
ENSG00000167767.12	ENSG00000167767.12	KRT80	chr12:52168995-52192000	Ctrl	siHIF1A	OK	2.97183	1.48414	-1.00172	-2.98035	5e-05	0.000604383	yes
ENSG00000167772.10	ENSG00000167772.10	ANGPTL4	chr19:7958578-8489114	Ctrl	siHIF1A	OK	361.706	150.856	-1.26164	-2.35195	5e-05	0.000604383	yes
ENSG00000167779.6	ENSG00000167779.6	IGFBP6	chr12:53097435-53102345	Ctrl	siHIF1A	OK	3.68207	13.8847	1.91491	4.26819	5e-05	0.000604383	yes
ENSG00000167895.13	ENSG00000167895.13	TMC8	chr17:78004167-78142968	Ctrl	siHIF1A	OK	2.78491	0.668344	-2.05897	-0.814565	5e-05	0.000604383	yes
ENSG00000167900.10	ENSG00000167900.10	TK1	chr17:78174074-78187233	Ctrl	siHIF1A	OK	13.0904	7.88252	-0.731785	-2.43704	5e-05	0.000604383	yes
ENSG00000167969.11	ENSG00000167969.11	ECI1	chr16:2239394-2252300	Ctrl	siHIF1A	OK	6.70922	14.9577	1.15667	3.27151	5e-05	0.000604383	yes
ENSG00000167972.12	ENSG00000167972.12	ABCA3	chr16:2275880-2426699	Ctrl	siHIF1A	OK	7.27657	12.4264	0.772079	2.20801	5e-05	0.000604383	yes
ENSG00000168028.12	ENSG00000168028.12	RPSA	chr3:39406688-39412542	Ctrl	siHIF1A	OK	709.066	511.822	-0.470278	-1.74473	5e-05	0.000604383	yes
ENSG00000168062.8	ENSG00000168062.8	BATF2	chr11:64987942-64997045	Ctrl	siHIF1A	OK	2.33117	4.05298	0.797929	2.00182	5e-05	0.000604383	yes
ENSG00000168092.12	ENSG00000168092.12	PAFAH1B2	chr11:117144266-117176894	Ctrl	siHIF1A	OK	33.3695	65.686	0.977055	3.90074	5e-05	0.000604383	yes
ENSG00000168298.5	ENSG00000168298.5	HIST1H1E	chr6:26156390-26157050	Ctrl	siHIF1A	OK	88.2216	48.5938	-0.860358	-3.36606	5e-05	0.000604383	yes
ENSG00000168306.11	ENSG00000168306.11	ACOX2	chr3:58505135-58537319	Ctrl	siHIF1A	OK	2.82369	1.22175	-1.20863	-1.67712	5e-05	0.000604383	yes
ENSG00000168386.17	ENSG00000168386.17	FILIP1L	chr3:99817833-100178603	Ctrl	siHIF1A	OK	8.85464	15.9998	0.853552	2.69189	5e-05	0.000604383	yes
ENSG00000168389.16	ENSG00000168389.16	MFSD2A	chr1:39955111-39969968	Ctrl	siHIF1A	OK	1.72194	0.521308	-1.72383	-2.03997	5e-05	0.000604383	yes
ENSG00000168610.13	ENSG00000168610.13	STAT3	chr17:42313323-42388568	Ctrl	siHIF1A	OK	38.374	58.3565	0.604763	1.85837	5e-05	0.000604383	yes
ENSG00000168615.10	ENSG00000168615.10	ADAM9	chr8:38996868-39105144	Ctrl	siHIF1A	OK	156.804	108.896	-0.526009	-1.7594	5e-05	0.000604383	yes
ENSG00000168675.17	ENSG00000168675.17	LDLRAD4	chr18:13217497-13652755	Ctrl	siHIF1A	OK	2.27129	0.701469	-1.69506	-1.41213	5e-05	0.000604383	yes
ENSG00000168685.13	ENSG00000168685.13	IL7R	chr5:35852694-35879603	Ctrl	siHIF1A	OK	0.613111	0.185456	-1.72508	-0.852064	5e-05	0.000604383	yes
ENSG00000168785.6	ENSG00000168785.6	TSPAN5	chr4:98470366-98658629	Ctrl	siHIF1A	OK	37.8397	23.8737	-0.664482	-2.45288	5e-05	0.000604383	yes
ENSG00000168961.15	ENSG00000168961.15	LGALS9	chr17:27456713-27649560	Ctrl	siHIF1A	OK	23.9131	64.0388	1.42115	2.36425	5e-05	0.000604383	yes
ENSG00000169105.7	ENSG00000169105.7	CHST14	chr15:40470997-40474571	Ctrl	siHIF1A	OK	5.35629	14.2999	1.4167	4.65704	5e-05	0.000604383	yes
ENSG00000169213.6	ENSG00000169213.6	RAB3B	chr1:51907955-51990764	Ctrl	siHIF1A	OK	14.129	7.19944	-0.972698	-4.02193	5e-05	0.000604383	yes
ENSG00000169220.16	ENSG00000169220.16	RGS14	chr5:177357836-177372601	Ctrl	siHIF1A	OK	4.18847	1.55902	-1.42579	-2.10056	5e-05	0.000604383	yes
ENSG00000169221.12	ENSG00000169221.12	TBC1D10B	chr16:30355440-30370264	Ctrl	siHIF1A	OK	10.3017	17.6165	0.774049	2.73643	5e-05	0.000604383	yes
ENSG00000169248.11	ENSG00000169248.11	CXCL11	chr4:76011183-76112802	Ctrl	siHIF1A	OK	5.24248	11.3393	1.11301	3.11487	5e-05	0.000604383	yes
ENSG00000169359.12	ENSG00000169359.12	SLC33A1	chr3:155821023-155854429	Ctrl	siHIF1A	OK	9.501	21.2904	1.16405	3.35825	5e-05	0.000604383	yes
ENSG00000169418.9	ENSG00000169418.9	NPR1	chr1:153678636-153693992	Ctrl	siHIF1A	OK	1.1681	3.64805	1.64296	4.23489	5e-05	0.000604383	yes
ENSG00000169429.9	ENSG00000169429.9	CXCL8	chr4:73740505-73743716	Ctrl	siHIF1A	OK	34.6869	8.03461	-2.11009	-6.78184	5e-05	0.000604383	yes
ENSG00000169607.11	ENSG00000169607.11	CKAP2L	chr2:112721485-112764677	Ctrl	siHIF1A	OK	1.64117	0.678007	-1.27535	-1.85109	5e-05	0.000604383	yes
ENSG00000169715.13	ENSG00000169715.13	MT1E	chr16:56625474-56627112	Ctrl	siHIF1A	OK	42.4007	154.973	1.86986	5.89698	5e-05	0.000604383	yes
ENSG00000169756.15	ENSG00000169756.15	LIMS1	chr2:108534354-108687246	Ctrl	siHIF1A	OK	120.965	53.9985	-1.1636	-3.81051	5e-05	0.000604383	yes
ENSG00000169891.16	ENSG00000169891.16	REPS2	chrX:16946690-17153280	Ctrl	siHIF1A	OK	2.56616	1.2023	-1.09381	-1.84635	5e-05	0.000604383	yes
ENSG00000169908.9	ENSG00000169908.9	TM4SF1	chr3:149369021-149386583	Ctrl	siHIF1A	OK	279.828	484.949	0.793291	2.98361	5e-05	0.000604383	yes
ENSG00000169992.8	ENSG00000169992.8	NLGN2	chr17:7404873-7419860	Ctrl	siHIF1A	OK	6.28567	3.6553	-0.782077	-1.90482	5e-05	0.000604383	yes
ENSG00000170017.11	ENSG00000170017.11	ALCAM	chr3:105366908-105576900	Ctrl	siHIF1A	OK	34.2393	23.067	-0.569823	-2.14175	5e-05	0.000604383	yes
ENSG00000170027.6	ENSG00000170027.6	YWHAG	chr7:76326793-76359031	Ctrl	siHIF1A	OK	73.602	99.9973	0.442144	1.79716	5e-05	0.000604383	yes
ENSG00000170113.14	ENSG00000170113.14	NIPA1	chr15:22757856-22829791	Ctrl	siHIF1A	OK	8.13912	5.70184	-0.513445	-1.35456	5e-05	0.000604383	yes
ENSG00000170275.13	ENSG00000170275.13	CRTAP	chr3:33113978-33147773	Ctrl	siHIF1A	OK	111.836	70.1	-0.673892	-2.06675	5e-05	0.000604383	yes
ENSG00000170312.14	ENSG00000170312.14	CDK1	chr10:60778330-60794852	Ctrl	siHIF1A	OK	15.0648	8.46197	-0.832119	-2.48898	5e-05	0.000604383	yes
ENSG00000170323.7	ENSG00000170323.7	FABP4	chr8:81439435-81533275	Ctrl	siHIF1A	OK	45.6747	62.3571	0.449158	1.66037	5e-05	0.000604383	yes
ENSG00000170425.3	ENSG00000170425.3	ADORA2B	chr17:15944916-15975746	Ctrl	siHIF1A	OK	13.1817	4.8011	-1.4571	-4.69459	5e-05	0.000604383	yes
ENSG00000170522.8	ENSG00000170522.8	ELOVL6	chr4:110045845-110199199	Ctrl	siHIF1A	OK	2.54953	0.884169	-1.52784	-1.70795	5e-05	0.000604383	yes
ENSG00000170581.12	ENSG00000170581.12	STAT2	chr12:56341596-56360155	Ctrl	siHIF1A	OK	33.9073	64.063	0.917896	2.86647	5e-05	0.000604383	yes
ENSG00000170775.2	ENSG00000170775.2	GPR37	chr7:124745996-124765627	Ctrl	siHIF1A	OK	4.06345	2.4971	-0.702455	-2.16414	5e-05	0.000604383	yes
ENSG00000170801.8	ENSG00000170801.8	HTRA3	chr4:8269764-8307111	Ctrl	siHIF1A	OK	31.998	22.7807	-0.490171	-1.95024	5e-05	0.000604383	yes
ENSG00000170836.10	ENSG00000170836.10	PPM1D	chr17:60600182-60666280	Ctrl	siHIF1A	OK	11.1517	15.4682	0.472046	1.83568	5e-05	0.000604383	yes
ENSG00000170962.11	ENSG00000170962.11	PDGFD	chr11:103907185-104164379	Ctrl	siHIF1A	OK	9.50519	6.20235	-0.6159	-2.29905	5e-05	0.000604383	yes
ENSG00000170989.8	ENSG00000170989.8	S1PR1	chr1:101236887-101241518	Ctrl	siHIF1A	OK	102.594	163.47	0.672079	2.23402	5e-05	0.000604383	yes
ENSG00000171016.10	ENSG00000171016.10	PYGO1	chr15:55538889-55588947	Ctrl	siHIF1A	OK	0.647205	0.245086	-1.40094	-3.02461	5e-05	0.000604383	yes
ENSG00000171115.3	ENSG00000171115.3	GIMAP8	chr7:150450629-150479392	Ctrl	siHIF1A	OK	20.379	38.8657	0.931411	3.85364	5e-05	0.000604383	yes
ENSG00000171208.8	ENSG00000171208.8	NETO2	chr16:47077702-47143997	Ctrl	siHIF1A	OK	12.2559	7.01063	-0.805862	-2.03087	5e-05	0.000604383	yes
ENSG00000171223.5	ENSG00000171223.5	JUNB	chr19:12763002-12874951	Ctrl	siHIF1A	OK	62.5257	32.7616	-0.932442	-1.98334	5e-05	0.000604383	yes
ENSG00000171241.7	ENSG00000171241.7	SHCBP1	chr16:46580553-46621626	Ctrl	siHIF1A	OK	4.08274	2.17565	-0.908087	-1.89567	5e-05	0.000604383	yes
ENSG00000171262.10	ENSG00000171262.10	FAM98B	chr15:38454126-38487710	Ctrl	siHIF1A	OK	3.73568	1.60992	-1.21438	-2.33158	5e-05	0.000604383	yes
ENSG00000171298.11	ENSG00000171298.11	GAA	chr17:80101555-80119879	Ctrl	siHIF1A	OK	12.901	19.7042	0.611016	1.64788	5e-05	0.000604383	yes
ENSG00000171307.17	ENSG00000171307.17	ZDHHC16	chr10:97446130-97457370	Ctrl	siHIF1A	OK	13.9325	25.4537	0.869419	2.94729	5e-05	0.000604383	yes
ENSG00000171314.8	ENSG00000171314.8	PGAM1	chr10:97426159-97433441	Ctrl	siHIF1A	OK	183.465	127.163	-0.528825	-2.11343	5e-05	0.000604383	yes
ENSG00000171346.12	ENSG00000171346.12	KRT15	chr17:41513742-41522529	Ctrl	siHIF1A	OK	1.66078	0.531701	-1.64317	-1.62479	5e-05	0.000604383	yes
ENSG00000171408.12	ENSG00000171408.12	PDE7B	chr6:135851695-136225751	Ctrl	siHIF1A	OK	5.39798	8.82715	0.709529	2.08693	5e-05	0.000604383	yes
ENSG00000171451.13	ENSG00000171451.13	DSEL	chr18:67506581-67899619	Ctrl	siHIF1A	OK	1.80985	1.05385	-0.780201	-2.11246	5e-05	0.000604383	yes
ENSG00000171552.11	ENSG00000171552.11	BCL2L1	chr20:31664451-31723989	Ctrl	siHIF1A	OK	19.9507	37.3766	0.905701	2.92043	5e-05	0.000604383	yes
ENSG00000171603.15	ENSG00000171603.15	CLSTN1	chr1:9651731-9824526	Ctrl	siHIF1A	OK	36.7474	49.4691	0.428887	1.61418	5e-05	0.000604383	yes
ENSG00000171700.12	ENSG00000171700.12	RGS19	chr20:64073180-64079988	Ctrl	siHIF1A	OK	7.28036	14.0204	0.945443	2.42259	5e-05	0.000604383	yes
ENSG00000171724.2	ENSG00000171724.2	VAT1L	chr16:77788529-77980107	Ctrl	siHIF1A	OK	2.37163	0.541322	-2.13132	-4.20878	5e-05	0.000604383	yes
ENSG00000171729.12	ENSG00000171729.12	TMEM51	chr1:15152531-15220480	Ctrl	siHIF1A	OK	11.3837	6.68981	-0.766927	-2.62241	5e-05	0.000604383	yes
ENSG00000171928.12	ENSG00000171928.12	TVP23B	chr17:18780994-18806714	Ctrl	siHIF1A	OK	18.4156	28.7359	0.641921	2.13384	5e-05	0.000604383	yes
ENSG00000172006.10	ENSG00000172006.10	ZNF554	chr19:2819873-2835773	Ctrl	siHIF1A	OK	0.609415	1.12535	0.884876	1.90201	5e-05	0.000604383	yes
ENSG00000172159.14	ENSG00000172159.14	FRMD3	chr9:83242989-83538546	Ctrl	siHIF1A	OK	10.7033	4.15079	-1.3666	-2.90309	5e-05	0.000604383	yes
ENSG00000172197.10	ENSG00000172197.10	MBOAT1	chr6:20102144-20317739	Ctrl	siHIF1A	OK	2.23712	1.30027	-0.782834	-1.74463	5e-05	0.000604383	yes
ENSG00000172331.10	ENSG00000172331.10	BPGM	chr7:134646807-134679813	Ctrl	siHIF1A	OK	24.4586	15.4899	-0.659013	-2.48436	5e-05	0.000604383	yes
ENSG00000172578.10	ENSG00000172578.10	KLHL6	chr3:183487530-183555689	Ctrl	siHIF1A	OK	15.1246	7.45439	-1.02073	-4.09286	5e-05	0.000604383	yes
ENSG00000172888.10	ENSG00000172888.10	ZNF621	chr3:40524877-40574685	Ctrl	siHIF1A	OK	5.87371	3.92709	-0.580811	-1.72534	5e-05	0.000604383	yes
ENSG00000172889.14	ENSG00000172889.14	EGFL7	chr9:136648609-136672678	Ctrl	siHIF1A	OK	728.026	409.081	-0.831604	-2.66344	5e-05	0.000604383	yes
ENSG00000173193.12	ENSG00000173193.12	PARP14	chr3:122680617-122730840	Ctrl	siHIF1A	OK	25.9118	45.9094	0.825181	2.25841	5e-05	0.000604383	yes
ENSG00000173207.11	ENSG00000173207.11	CKS1B	chr1:154974652-154979249	Ctrl	siHIF1A	OK	19.5355	12.8166	-0.608085	-1.95677	5e-05	0.000604383	yes
ENSG00000173272.12	ENSG00000173272.12	MZT2A	chr2:131464899-131492743	Ctrl	siHIF1A	OK	122.38	76.3538	-0.680599	-2.32933	5e-05	0.000604383	yes
ENSG00000173457.9	ENSG00000173457.9	PPP1R14B	chr11:64244479-64249494	Ctrl	siHIF1A	OK	126.722	163.906	0.371204	1.51315	5e-05	0.000604383	yes
ENSG00000173511.8	ENSG00000173511.8	VEGFB	chr11:64234537-64238793	Ctrl	siHIF1A	OK	50.5808	34.9517	-0.533224	-1.89297	5e-05	0.000604383	yes
ENSG00000173530.5	ENSG00000173530.5	TNFRSF10D	chr8:23135587-23164030	Ctrl	siHIF1A	OK	65.8064	42.7806	-0.621271	-2.54226	5e-05	0.000604383	yes
ENSG00000173535.12	ENSG00000173535.12	TNFRSF10C	chr8:23084354-23117437	Ctrl	siHIF1A	OK	29.6716	52.5443	0.824451	3.14262	5e-05	0.000604383	yes
ENSG00000173542.7	ENSG00000173542.7	MOB1B	chr4:70902325-71030914	Ctrl	siHIF1A	OK	9.43693	6.57419	-0.521505	-1.49754	5e-05	0.000604383	yes
ENSG00000173545.4	ENSG00000173545.4	ZNF622	chr5:16451518-16465792	Ctrl	siHIF1A	OK	9.14433	13.4999	0.562	2.05841	5e-05	0.000604383	yes
ENSG00000173597.7	ENSG00000173597.7	SULT1B1	chr4:69721161-69787961	Ctrl	siHIF1A	OK	10.6478	17.1961	0.691529	1.90451	5e-05	0.000604383	yes
ENSG00000173705.7	ENSG00000173705.7	SUSD5	chr3:33150041-33219215	Ctrl	siHIF1A	OK	2.74325	1.92916	-0.507914	-1.55653	5e-05	0.000604383	yes
ENSG00000173812.9	ENSG00000173812.9	EIF1	chr17:41688884-41692668	Ctrl	siHIF1A	OK	157.053	107.461	-0.547446	-1.9324	5e-05	0.000604383	yes
ENSG00000174004.5	ENSG00000174004.5	NRROS	chr3:196639685-196736007	Ctrl	siHIF1A	OK	6.34537	3.37739	-0.909797	-1.81358	5e-05	0.000604383	yes
ENSG00000174059.15	ENSG00000174059.15	CD34	chr1:207880971-207911402	Ctrl	siHIF1A	OK	130.668	89.813	-0.540914	-1.9901	5e-05	0.000604383	yes
ENSG00000174437.15	ENSG00000174437.15	ATP2A2	chr12:110280755-110351093	Ctrl	siHIF1A	OK	48.8703	31.5087	-0.633206	-2.10446	5e-05	0.000604383	yes
ENSG00000175040.5	ENSG00000175040.5	CHST2	chr3:143119330-143131893	Ctrl	siHIF1A	OK	4.32354	9.05446	1.06642	3.86772	5e-05	0.000604383	yes
ENSG00000175063.15	ENSG00000175063.15	UBE2C	chr20:45812575-45816957	Ctrl	siHIF1A	OK	13.7825	7.95159	-0.79352	-2.33762	5e-05	0.000604383	yes
ENSG00000175155.7	ENSG00000175155.7	YPEL2	chr17:59331688-59403303	Ctrl	siHIF1A	OK	22.6084	34.1202	0.59377	1.99225	5e-05	0.000604383	yes
ENSG00000175183.8	ENSG00000175183.8	CSRP2	chr12:76858714-76880352	Ctrl	siHIF1A	OK	3.08782	1.31286	-1.23388	-1.90442	5e-05	0.000604383	yes
ENSG00000175264.6	ENSG00000175264.6	CHST1	chr11:45648876-45665622	Ctrl	siHIF1A	OK	22.3925	13.5076	-0.729245	-2.67891	5e-05	0.000604383	yes
ENSG00000175274.17	ENSG00000175274.17	TP53I11	chr11:44719391-44951306	Ctrl	siHIF1A	OK	60.724	32.6375	-0.895737	-1.78463	5e-05	0.000604383	yes
ENSG00000175352.9	ENSG00000175352.9	NRIP3	chr11:8980575-9004049	Ctrl	siHIF1A	OK	2.83451	1.1865	-1.25638	-2.62687	5e-05	0.000604383	yes
ENSG00000175395.14	ENSG00000175395.14	ZNF25	chr10:37949571-37976633	Ctrl	siHIF1A	OK	2.41831	3.44758	0.511583	1.6237	5e-05	0.000604383	yes
ENSG00000175467.13	ENSG00000175467.13	SART1	chr11:65961688-65979828	Ctrl	siHIF1A	OK	9.64076	16.6858	0.791398	1.76204	5e-05	0.000604383	yes
ENSG00000175556.15	ENSG00000175556.15	LONRF3	chrX:118974613-119018355	Ctrl	siHIF1A	OK	5.59935	2.77414	-1.01322	-3.27671	5e-05	0.000604383	yes
ENSG00000175806.13	ENSG00000175806.13	MSRA	chr8:10054267-10428891	Ctrl	siHIF1A	OK	5.77872	8.69542	0.589505	1.74705	5e-05	0.000604383	yes
ENSG00000176171.10	ENSG00000176171.10	BNIP3	chr10:131966454-131981931	Ctrl	siHIF1A	OK	46.4387	19.3767	-1.261	-5.04052	5e-05	0.000604383	yes
ENSG00000176435.6	ENSG00000176435.6	CLEC14A	chr14:38254102-38256369	Ctrl	siHIF1A	OK	47.229	227.683	2.26928	9.17738	5e-05	0.000604383	yes
ENSG00000176438.11	ENSG00000176438.11	SYNE3	chr14:95407265-95475836	Ctrl	siHIF1A	OK	2.86475	4.72582	0.722153	2.17977	5e-05	0.000604383	yes
ENSG00000176542.8	ENSG00000176542.8	KIAA2018	chr3:113648384-113696646	Ctrl	siHIF1A	OK	2.19527	1.34655	-0.705127	-2.23446	5e-05	0.000604383	yes
ENSG00000176597.10	ENSG00000176597.10	B3GNT5	chr3:183178042-183428778	Ctrl	siHIF1A	OK	21.7974	12.3147	-0.823775	-2.96366	5e-05	0.000604383	yes
ENSG00000176720.4	ENSG00000176720.4	BOK	chr2:241544402-241574138	Ctrl	siHIF1A	OK	25.4384	35.2506	0.470636	1.92238	5e-05	0.000604383	yes
ENSG00000176853.14	ENSG00000176853.14	FAM91A1	chr8:123768455-123815452	Ctrl	siHIF1A	OK	23.5673	14.8804	-0.663369	-1.94411	5e-05	0.000604383	yes
ENSG00000176871.7	ENSG00000176871.7	WSB2	chr12:118013587-118062430	Ctrl	siHIF1A	OK	79.0935	43.668	-0.856984	-3.15307	5e-05	0.000604383	yes
ENSG00000176907.4	ENSG00000176907.4	C8orf4	chr8:40153454-40155308	Ctrl	siHIF1A	OK	39.6965	20.5898	-0.947083	-3.76885	5e-05	0.000604383	yes
ENSG00000177125.5	ENSG00000177125.5	ZBTB34	chr9:126860664-126885878	Ctrl	siHIF1A	OK	5.7416	3.62882	-0.661953	-2.48916	5e-05	0.000604383	yes
ENSG00000177239.13	ENSG00000177239.13	MAN1B1	chr9:137086926-137109187	Ctrl	siHIF1A	OK	29.8109	44.5487	0.579543	2.14938	5e-05	0.000604383	yes
ENSG00000177380.12	ENSG00000177380.12	PPFIA3	chr19:49119388-49151026	Ctrl	siHIF1A	OK	2.06002	0.857843	-1.26387	-1.55172	5e-05	0.000604383	yes
ENSG00000177409.10	ENSG00000177409.10	SAMD9L	chr7:93130054-93148369	Ctrl	siHIF1A	OK	14.0051	31.9513	1.18992	2.7634	5e-05	0.000604383	yes
ENSG00000177469.12	ENSG00000177469.12	PTRF	chr17:42402451-42423517	Ctrl	siHIF1A	OK	154.417	278.729	0.852027	3.15075	5e-05	0.000604383	yes
ENSG00000177628.14	ENSG00000177628.14	GBA	chr1:155234451-155244699	Ctrl	siHIF1A	OK	35.418	65.128	0.878798	2.63108	5e-05	0.000604383	yes
ENSG00000177675.7	ENSG00000177675.7	CD163L1	chr12:7346684-7503893	Ctrl	siHIF1A	OK	2.99729	5.94051	0.98693	1.56811	5e-05	0.000604383	yes
ENSG00000177888.7	ENSG00000177888.7	ZBTB41	chr1:197153679-197200542	Ctrl	siHIF1A	OK	5.30226	3.12492	-0.762786	-2.87695	5e-05	0.000604383	yes
ENSG00000177946.5	ENSG00000177946.5	CENPBD1	chr16:89969790-89972544	Ctrl	siHIF1A	OK	1.40571	2.3503	0.741552	1.87479	5e-05	0.000604383	yes
ENSG00000178053.16	ENSG00000178053.16	MLF1	chr3:158571162-158607252	Ctrl	siHIF1A	OK	3.84393	2.27782	-0.754928	-1.49166	5e-05	0.000604383	yes
ENSG00000178175.10	ENSG00000178175.10	ZNF366	chr5:72442651-72507727	Ctrl	siHIF1A	OK	0.697582	1.86721	1.42045	2.81513	5e-05	0.000604383	yes
ENSG00000178209.13	ENSG00000178209.13	PLEC	chr8:143915146-143976734	Ctrl	siHIF1A	OK	22.3973	34.6824	0.630879	1.18251	5e-05	0.000604383	yes
ENSG00000178343.4	ENSG00000178343.4	SHISA3	chr4:42397838-42402487	Ctrl	siHIF1A	OK	3.43248	5.52123	0.685741	1.96966	5e-05	0.000604383	yes
ENSG00000178685.12	ENSG00000178685.12	PARP10	chr8:143977152-144047085	Ctrl	siHIF1A	OK	14.7505	29.7487	1.01207	1.33953	5e-05	0.000604383	yes
ENSG00000178695.5	ENSG00000178695.5	KCTD12	chr13:76880165-76886400	Ctrl	siHIF1A	OK	58.2637	94.9845	0.705096	2.75487	5e-05	0.000604383	yes
ENSG00000178726.6	ENSG00000178726.6	THBD	chr20:23045632-23049741	Ctrl	siHIF1A	OK	8.70212	19.6579	1.17567	4.56137	5e-05	0.000604383	yes
ENSG00000178814.14	ENSG00000178814.14	OPLAH	chr8:144049128-144063832	Ctrl	siHIF1A	OK	1.72437	0.583526	-1.5632	-1.85435	5e-05	0.000604383	yes
ENSG00000178896.6	ENSG00000178896.6	EXOSC4	chr8:144078001-144080647	Ctrl	siHIF1A	OK	15.4794	9.78574	-0.661592	-2.00559	5e-05	0.000604383	yes
ENSG00000178988.10	ENSG00000178988.10	MRFAP1L1	chr4:6707700-6709880	Ctrl	siHIF1A	OK	17.2896	25.8038	0.577677	2.22038	5e-05	0.000604383	yes
ENSG00000178999.11	ENSG00000178999.11	AURKB	chr17:8204732-8210600	Ctrl	siHIF1A	OK	6.92712	3.95039	-0.810261	-1.91143	5e-05	0.000604383	yes
ENSG00000179010.13	ENSG00000179010.13	MRFAP1	chr4:6640090-6642745	Ctrl	siHIF1A	OK	64.6641	113.712	0.81435	3.33112	5e-05	0.000604383	yes
ENSG00000179119.13	ENSG00000179119.13	SPTY2D1	chr11:18599786-18634791	Ctrl	siHIF1A	OK	4.54516	6.34569	0.481444	1.68381	5e-05	0.000604383	yes
ENSG00000179144.4	ENSG00000179144.4	GIMAP7	chr7:150514829-150521073	Ctrl	siHIF1A	OK	22.9736	47.7836	1.05654	4.13873	5e-05	0.000604383	yes
ENSG00000179195.14	ENSG00000179195.14	ZNF664	chr12:123762187-124316024	Ctrl	siHIF1A	OK	11.107	26.4197	1.25015	2.66928	5e-05	0.000604383	yes
ENSG00000179218.12	ENSG00000179218.12	CALR	chr19:12938577-12944489	Ctrl	siHIF1A	OK	359.631	524.891	0.545498	1.77065	5e-05	0.000604383	yes
ENSG00000179222.16	ENSG00000179222.16	MAGED1	chrX:51803006-51902357	Ctrl	siHIF1A	OK	39.4559	54.6493	0.469964	1.75818	5e-05	0.000604383	yes
ENSG00000179241.11	ENSG00000179241.11	LDLRAD3	chr11:35943980-36232136	Ctrl	siHIF1A	OK	14.9046	10.4192	-0.516508	-1.64398	5e-05	0.000604383	yes
ENSG00000179262.8	ENSG00000179262.8	RAD23A	chr19:12945854-12957236	Ctrl	siHIF1A	OK	21.6513	35.8568	0.727794	1.80033	5e-05	0.000604383	yes
ENSG00000179277.9	ENSG00000179277.9	MEIS3P1	chr17:15786617-15787575	Ctrl	siHIF1A	OK	1.30983	0.460682	-1.50753	-2.17601	5e-05	0.000604383	yes
ENSG00000179542.14	ENSG00000179542.14	SLITRK4	chrX:143622789-143635777	Ctrl	siHIF1A	OK	0.860722	0.376876	-1.19146	-2.58031	5e-05	0.000604383	yes
ENSG00000179627.9	ENSG00000179627.9	ZBTB42	chr14:104800595-104804712	Ctrl	siHIF1A	OK	0.930651	1.69884	0.86824	1.95083	5e-05	0.000604383	yes
ENSG00000179630.9	ENSG00000179630.9	LACC1	chr13:43823908-44030461	Ctrl	siHIF1A	OK	3.62496	1.93435	-0.906121	-2.24414	5e-05	0.000604383	yes
ENSG00000179750.14	ENSG00000179750.14	APOBEC3B	chr22:38952740-38998209	Ctrl	siHIF1A	OK	1.4744	0.503103	-1.5512	-2.47024	5e-05	0.000604383	yes
ENSG00000179855.5	ENSG00000179855.5	GIPC3	chr19:3585552-3593541	Ctrl	siHIF1A	OK	0.907159	0.379495	-1.25728	-3.04733	5e-05	0.000604383	yes
ENSG00000179862.6	ENSG00000179862.6	CITED4	chr1:40861050-40862366	Ctrl	siHIF1A	OK	9.69429	4.72737	-1.0361	-2.62199	5e-05	0.000604383	yes
ENSG00000179899.8	ENSG00000179899.8	PHC1P1	chr12:55411726-55414787	Ctrl	siHIF1A	OK	0.912555	0.409878	-1.15472	-2.42716	5e-05	0.000604383	yes
ENSG00000179981.9	ENSG00000179981.9	TSHZ1	chr18:75210754-75289950	Ctrl	siHIF1A	OK	1.84301	2.9526	0.679918	2.06906	5e-05	0.000604383	yes
ENSG00000180488.13	ENSG00000180488.13	FAM73A	chr1:77779623-77879539	Ctrl	siHIF1A	OK	7.41285	4.72964	-0.648299	-1.85206	5e-05	0.000604383	yes
ENSG00000180543.4	ENSG00000180543.4	TSPYL5	chr8:97273473-97277964	Ctrl	siHIF1A	OK	0.548196	1.13134	1.04527	2.47163	5e-05	0.000604383	yes
ENSG00000180667.9	ENSG00000180667.9	YOD1	chr1:207006844-207099993	Ctrl	siHIF1A	OK	5.73015	3.45746	-0.728862	-2.57513	5e-05	0.000604383	yes
ENSG00000180694.12	ENSG00000180694.12	TMEM64	chr8:90621994-90985257	Ctrl	siHIF1A	OK	39.5562	15.6613	-1.3367	-4.8081	5e-05	0.000604383	yes
ENSG00000180998.10	ENSG00000180998.10	GPR137C	chr14:52553147-52637713	Ctrl	siHIF1A	OK	1.56449	0.850427	-0.879432	-1.89216	5e-05	0.000604383	yes
ENSG00000181104.6	ENSG00000181104.6	F2R	chr5:76403248-76735781	Ctrl	siHIF1A	OK	143.93	107.947	-0.415042	-1.45484	5e-05	0.000604383	yes
ENSG00000181264.7	ENSG00000181264.7	TMEM136	chr11:120325128-120333682	Ctrl	siHIF1A	OK	7.75869	5.32531	-0.542948	-1.51739	5e-05	0.000604383	yes
ENSG00000181274.6	ENSG00000181274.6	FRAT2	chr10:97332496-97343203	Ctrl	siHIF1A	OK	4.59436	6.74015	0.552917	1.73835	5e-05	0.000604383	yes
ENSG00000181381.12	ENSG00000181381.12	DDX60L	chr4:168356734-169010275	Ctrl	siHIF1A	OK	11.9426	28.3222	1.24582	2.08508	5e-05	0.000604383	yes
ENSG00000181444.11	ENSG00000181444.11	ZNF467	chr7:149764181-149773479	Ctrl	siHIF1A	OK	1.77265	3.95644	1.15829	2.48109	5e-05	0.000604383	yes
ENSG00000181588.16	ENSG00000181588.16	MEX3D	chr19:1554668-1568058	Ctrl	siHIF1A	OK	19.8976	34.316	0.786284	3.00604	5e-05	0.000604383	yes
ENSG00000181634.7	ENSG00000181634.7	TNFSF15	chr9:114784634-114806126	Ctrl	siHIF1A	OK	8.12711	5.04061	-0.689143	-2.37624	5e-05	0.000604383	yes
ENSG00000181649.5	ENSG00000181649.5	PHLDA2	chr11:2928272-2929455	Ctrl	siHIF1A	OK	11.4398	6.81884	-0.746462	-1.96606	5e-05	0.000604383	yes
ENSG00000181751.8	ENSG00000181751.8	C5orf30	chr5:103258701-103278660	Ctrl	siHIF1A	OK	7.3398	5.20014	-0.497189	-1.66613	5e-05	0.000604383	yes
ENSG00000181804.13	ENSG00000181804.13	SLC9A9	chr3:143265221-143848531	Ctrl	siHIF1A	OK	2.87486	1.19538	-1.26602	-1.48444	5e-05	0.000604383	yes
ENSG00000181826.8	ENSG00000181826.8	RELL1	chr4:37453940-37686376	Ctrl	siHIF1A	OK	36.6055	51.21	0.484366	1.9609	5e-05	0.000604383	yes
ENSG00000181827.13	ENSG00000181827.13	RFX7	chr15:56087279-56243266	Ctrl	siHIF1A	OK	3.80949	2.2096	-0.785816	-2.54038	5e-05	0.000604383	yes
ENSG00000182013.16	ENSG00000182013.16	PNMAL1	chr19:46466490-46471563	Ctrl	siHIF1A	OK	2.51363	1.67364	-0.586786	-1.67636	5e-05	0.000604383	yes
ENSG00000182118.5	ENSG00000182118.5	FAM89A	chr1:231018957-231040246	Ctrl	siHIF1A	OK	25.8815	13.7336	-0.914206	-3.29391	5e-05	0.000604383	yes
ENSG00000182400.13	ENSG00000182400.13	TRAPPC6B	chr14:39147810-39170532	Ctrl	siHIF1A	OK	8.70393	12.7698	0.552991	1.76813	5e-05	0.000604383	yes
ENSG00000182481.7	ENSG00000182481.7	KPNA2	chr17:68035518-68046842	Ctrl	siHIF1A	OK	117.63	81.9475	-0.521482	-2.05279	5e-05	0.000604383	yes
ENSG00000182492.14	ENSG00000182492.14	BGN	chrX:153444719-153509554	Ctrl	siHIF1A	OK	134.855	88.1054	-0.614105	-1.89991	5e-05	0.000604383	yes
ENSG00000182551.12	ENSG00000182551.12	ADI1	chr2:3496955-3523197	Ctrl	siHIF1A	OK	21.8708	29.3857	0.426108	1.65455	5e-05	0.000604383	yes
ENSG00000182704.7	ENSG00000182704.7	TSKU	chr11:76782250-76798154	Ctrl	siHIF1A	OK	12.9842	9.14502	-0.505698	-1.72587	5e-05	0.000604383	yes
ENSG00000182916.7	ENSG00000182916.7	TCEAL7	chrX:103330195-103332326	Ctrl	siHIF1A	OK	9.40082	3.58961	-1.38896	-3.75626	5e-05	0.000604383	yes
ENSG00000183018.7	ENSG00000183018.7	SPNS2	chr17:4497393-4555631	Ctrl	siHIF1A	OK	7.03748	15.4156	1.13126	2.13419	5e-05	0.000604383	yes
ENSG00000183087.13	ENSG00000183087.13	GAS6	chr13:113759239-113864067	Ctrl	siHIF1A	OK	40.7904	64.6189	0.663728	2.33052	5e-05	0.000604383	yes
ENSG00000183287.12	ENSG00000183287.12	CCBE1	chr18:59430939-59698111	Ctrl	siHIF1A	OK	0.769302	2.43517	1.6624	2.42583	5e-05	0.000604383	yes
ENSG00000183486.11	ENSG00000183486.11	MX2	chr21:41361942-41409390	Ctrl	siHIF1A	OK	2.0428	22.2389	3.44446	7.7516	5e-05	0.000604383	yes
ENSG00000183598.3	ENSG00000183598.3	HIST2H3D	chr1:149813270-149813681	Ctrl	siHIF1A	OK	11.6864	5.79449	-1.01208	-1.99841	5e-05	0.000604383	yes
ENSG00000183615.5	ENSG00000183615.5	FAM167B	chr1:32247232-32248856	Ctrl	siHIF1A	OK	15.952	24.737	0.632937	2.22558	5e-05	0.000604383	yes
ENSG00000183668.16	ENSG00000183668.16	PSG9	chr19:43211790-43269530	Ctrl	siHIF1A	OK	0.575113	1.25842	1.12969	2.11952	5e-05	0.000604383	yes
ENSG00000183688.4	ENSG00000183688.4	FAM101B	chr17:439977-445939	Ctrl	siHIF1A	OK	19.0896	10.577	-0.851862	-3.3596	5e-05	0.000604383	yes
ENSG00000183696.12	ENSG00000183696.12	UPP1	chr7:48088627-48108733	Ctrl	siHIF1A	OK	26.2733	45.2317	0.783738	2.81013	5e-05	0.000604383	yes
ENSG00000183723.11	ENSG00000183723.11	CMTM4	chr16:66614749-66696707	Ctrl	siHIF1A	OK	5.68829	2.10627	-1.43331	-2.67813	5e-05	0.000604383	yes
ENSG00000183856.9	ENSG00000183856.9	IQGAP3	chr1:156525404-156572604	Ctrl	siHIF1A	OK	2.65827	1.3283	-1.00091	-2.52315	5e-05	0.000604383	yes
ENSG00000184014.6	ENSG00000184014.6	DENND5A	chr11:9138824-9265390	Ctrl	siHIF1A	OK	18.1171	28.8095	0.669198	1.60079	5e-05	0.000604383	yes
ENSG00000184164.13	ENSG00000184164.13	CRELD2	chr22:49900228-49927540	Ctrl	siHIF1A	OK	20.2255	37.7826	0.901549	2.57681	5e-05	0.000604383	yes
ENSG00000184182.17	ENSG00000184182.17	UBE2F	chr2:237966826-238099413	Ctrl	siHIF1A	OK	29.6209	18.3026	-0.694564	-1.79973	5e-05	0.000604383	yes
ENSG00000184260.5	ENSG00000184260.5	HIST2H2AC	chr1:149886974-149887364	Ctrl	siHIF1A	OK	37.4605	21.8007	-0.780996	-2.1294	5e-05	0.000604383	yes
ENSG00000184292.6	ENSG00000184292.6	TACSTD2	chr1:58575422-58577773	Ctrl	siHIF1A	OK	7.71349	16.8187	1.12461	3.62421	5e-05	0.000604383	yes
ENSG00000184357.4	ENSG00000184357.4	HIST1H1B	chr6:27866848-27867529	Ctrl	siHIF1A	OK	62.7626	32.5747	-0.94615	-3.48862	5e-05	0.000604383	yes
ENSG00000184840.10	ENSG00000184840.10	TMED9	chr5:177592157-177596124	Ctrl	siHIF1A	OK	60.8314	95.2036	0.646201	2.6565	5e-05	0.000604383	yes
ENSG00000184979.9	ENSG00000184979.9	USP18	chr22:18149898-18177397	Ctrl	siHIF1A	OK	16.286	39.628	1.28289	5.10234	5e-05	0.000604383	yes
ENSG00000185022.10	ENSG00000185022.10	MAFF	chr22:38111494-38216511	Ctrl	siHIF1A	OK	52.4436	35.4121	-0.566524	-2.19484	5e-05	0.000604383	yes
ENSG00000185033.13	ENSG00000185033.13	SEMA4B	chr15:90160603-90229679	Ctrl	siHIF1A	OK	8.68246	4.79505	-0.85656	-1.89638	5e-05	0.000604383	yes
ENSG00000185100.9	ENSG00000185100.9	ADSSL1	chr14:104724185-104747325	Ctrl	siHIF1A	OK	7.17738	2.32583	-1.62571	-3.27816	5e-05	0.000604383	yes
ENSG00000185130.5	ENSG00000185130.5	HIST1H2BL	chr6:27807443-27807931	Ctrl	siHIF1A	OK	26.9696	16.2836	-0.727914	-2.14428	5e-05	0.000604383	yes
ENSG00000185164.13	ENSG00000185164.13	NOMO2	chr16:18417324-18562211	Ctrl	siHIF1A	OK	11.5147	18.4377	0.679181	2.56888	5e-05	0.000604383	yes
ENSG00000185339.7	ENSG00000185339.7	TCN2	chr22:30576624-30627278	Ctrl	siHIF1A	OK	69.268	132.891	0.939984	3.05666	5e-05	0.000604383	yes
ENSG00000185507.18	ENSG00000185507.18	IRF7	chr11:612552-615999	Ctrl	siHIF1A	OK	23.9772	55.7345	1.21691	3.58141	5e-05	0.000604383	yes
ENSG00000185515.13	ENSG00000185515.13	BRCC3	chrX:155061621-155156503	Ctrl	siHIF1A	OK	7.34842	4.01772	-0.871056	-2.02051	5e-05	0.000604383	yes
ENSG00000185561.9	ENSG00000185561.9	TLCD2	chr17:1702789-1710438	Ctrl	siHIF1A	OK	0.382588	0.667291	0.802525	1.98749	5e-05	0.000604383	yes
ENSG00000185567.6	ENSG00000185567.6	AHNAK2	chr14:104924815-104978357	Ctrl	siHIF1A	OK	22.4553	34.4173	0.616078	1.63745	5e-05	0.000604383	yes
ENSG00000185624.13	ENSG00000185624.13	P4HB	chr17:81843158-81860694	Ctrl	siHIF1A	OK	242.61	364.907	0.588893	1.59665	5e-05	0.000604383	yes
ENSG00000185745.9	ENSG00000185745.9	IFIT1	chr10:89213568-89414557	Ctrl	siHIF1A	OK	3.77908	42.3588	3.48655	4.05882	5e-05	0.000604383	yes
ENSG00000185880.11	ENSG00000185880.11	TRIM69	chr15:44728987-44767829	Ctrl	siHIF1A	OK	9.25355	18.9386	1.03325	2.23469	5e-05	0.000604383	yes
ENSG00000185947.13	ENSG00000185947.13	ZNF267	chr16:31873757-31917357	Ctrl	siHIF1A	OK	7.40707	11.545	0.640297	1.9977	5e-05	0.000604383	yes
ENSG00000185963.12	ENSG00000185963.12	BICD2	chr9:92711362-92764812	Ctrl	siHIF1A	OK	5.33086	14.424	1.43603	5.61387	5e-05	0.000604383	yes
ENSG00000185989.10	ENSG00000185989.10	RASA3	chr13:113977782-114132611	Ctrl	siHIF1A	OK	12.7407	17.505	0.458325	1.82109	5e-05	0.000604383	yes
ENSG00000186106.10	ENSG00000186106.10	ANKRD46	chr8:100509751-100559784	Ctrl	siHIF1A	OK	13.3992	9.1302	-0.55343	-1.76374	5e-05	0.000604383	yes
ENSG00000186193.8	ENSG00000186193.8	SAPCD2	chr9:137057662-137070588	Ctrl	siHIF1A	OK	1.96873	1.24026	-0.666627	-1.66026	5e-05	0.000604383	yes
ENSG00000186314.10	ENSG00000186314.10	PRELID2	chr5:145471798-145835369	Ctrl	siHIF1A	OK	11.1606	5.15334	-1.11484	-2.62357	5e-05	0.000604383	yes
ENSG00000186340.13	ENSG00000186340.13	THBS2	chr6:169213253-169254044	Ctrl	siHIF1A	OK	0.725231	0.168838	-2.1028	-1.20396	5e-05	0.000604383	yes
ENSG00000186468.11	ENSG00000186468.11	RPS23	chr5:81972024-82278577	Ctrl	siHIF1A	OK	1329.09	976.489	-0.444763	-1.61342	5e-05	0.000604383	yes
ENSG00000186470.12	ENSG00000186470.12	BTN3A2	chr6:26365158-26378320	Ctrl	siHIF1A	OK	8.85387	16.9043	0.93301	2.4986	5e-05	0.000604383	yes
ENSG00000186522.13	ENSG00000186522.13	2016-09-10	chr2:109542981-109614206	Ctrl	siHIF1A	OK	58.7826	42.1041	-0.481431	-1.52639	5e-05	0.000604383	yes
ENSG00000186642.14	ENSG00000186642.14	PDE2A	chr11:72576140-72674591	Ctrl	siHIF1A	OK	13.6526	25.6902	0.912041	2.16699	5e-05	0.000604383	yes
ENSG00000186716.18	ENSG00000186716.18	BCR	chr22:23179703-23318037	Ctrl	siHIF1A	OK	31.4991	43.5577	0.467616	1.35069	5e-05	0.000604383	yes
ENSG00000186827.9	ENSG00000186827.9	TNFRSF4	chr1:1211325-1214138	Ctrl	siHIF1A	OK	6.74103	1.2656	-2.41314	-4.89968	5e-05	0.000604383	yes
ENSG00000187049.8	ENSG00000187049.8	TMEM216	chr11:61391686-61398863	Ctrl	siHIF1A	OK	4.81848	8.68473	0.849903	2.00539	5e-05	0.000604383	yes
ENSG00000187189.10	ENSG00000187189.10	TSPYL4	chr6:116249960-116254140	Ctrl	siHIF1A	OK	4.38908	7.38424	0.750531	2.72402	5e-05	0.000604383	yes
ENSG00000187266.12	ENSG00000187266.12	EPOR	chr19:11377204-11419342	Ctrl	siHIF1A	OK	11.6895	7.59216	-0.622634	-1.98717	5e-05	0.000604383	yes
ENSG00000187513.8	ENSG00000187513.8	GJA4	chr1:34712736-34859816	Ctrl	siHIF1A	OK	14.8527	1.46579	-3.34098	-3.72917	5e-05	0.000604383	yes
ENSG00000187608.7	ENSG00000187608.7	ISG15	chr1:1001137-1014541	Ctrl	siHIF1A	OK	72.2301	343.174	2.24827	8.24429	5e-05	0.000604383	yes
ENSG00000187837.3	ENSG00000187837.3	HIST1H1C	chr6:26043226-26123926	Ctrl	siHIF1A	OK	133.859	78.262	-0.774328	-1.81735	5e-05	0.000604383	yes
ENSG00000187840.4	ENSG00000187840.4	EIF4EBP1	chr8:38030340-38060365	Ctrl	siHIF1A	OK	81.5605	49.7176	-0.714114	-2.7452	5e-05	0.000604383	yes
ENSG00000188042.7	ENSG00000188042.7	ARL4C	chr2:234493040-234497053	Ctrl	siHIF1A	OK	13.8743	8.61327	-0.687785	-2.66355	5e-05	0.000604383	yes
ENSG00000188070.9	ENSG00000188070.9	C11orf95	chr11:63759891-63768775	Ctrl	siHIF1A	OK	10.6984	17.1311	0.679222	1.80137	5e-05	0.000604383	yes
ENSG00000188211.7	ENSG00000188211.7	NCR3LG1	chr11:17351725-17377341	Ctrl	siHIF1A	OK	2.28877	1.59595	-0.520153	-1.72792	5e-05	0.000604383	yes
ENSG00000188313.11	ENSG00000188313.11	PLSCR1	chr3:146515179-146544864	Ctrl	siHIF1A	OK	44.7378	73.5345	0.716927	2.37206	5e-05	0.000604383	yes
ENSG00000188342.10	ENSG00000188342.10	GTF2F2	chr13:45120514-45284909	Ctrl	siHIF1A	OK	9.24315	13.7688	0.574944	2.0486	5e-05	0.000604383	yes
ENSG00000188517.13	ENSG00000188517.13	COL25A1	chr4:108810720-109302657	Ctrl	siHIF1A	OK	2.06151	0.583887	-1.81994	-1.82277	5e-05	0.000604383	yes
ENSG00000188641.11	ENSG00000188641.11	DPYD	chr1:97077742-97921049	Ctrl	siHIF1A	OK	9.86697	16.5419	0.745448	2.63061	5e-05	0.000604383	yes
ENSG00000188986.4	ENSG00000188986.4	NELFB	chr9:137255172-137273546	Ctrl	siHIF1A	OK	15.7683	24.1303	0.613816	2.42902	5e-05	0.000604383	yes
ENSG00000189058.7	ENSG00000189058.7	APOD	chr3:195568701-195584205	Ctrl	siHIF1A	OK	0.98021	2.28359	1.22014	2.13969	5e-05	0.000604383	yes
ENSG00000189067.11	ENSG00000189067.11	LITAF	chr16:11547721-11636381	Ctrl	siHIF1A	OK	3.00383	1.03834	-1.53253	-1.61449	5e-05	0.000604383	yes
ENSG00000189120.4	ENSG00000189120.4	SP6	chr17:47844907-47855874	Ctrl	siHIF1A	OK	2.0801	0.459839	-2.17745	-4.87862	5e-05	0.000604383	yes
ENSG00000189129.12	ENSG00000189129.12	PLAC9	chr10:80131681-80145359	Ctrl	siHIF1A	OK	2.99689	5.92308	0.982881	1.87623	5e-05	0.000604383	yes
ENSG00000189134.3	ENSG00000189134.3	NKAPL	chr6:28259319-28260958	Ctrl	siHIF1A	OK	0.310517	0.817089	1.39582	2.28654	5e-05	0.000604383	yes
ENSG00000189180.14	ENSG00000189180.14	ZNF33A	chr10:38010649-38065088	Ctrl	siHIF1A	OK	4.52498	7.19207	0.668498	1.65962	5e-05	0.000604383	yes
ENSG00000196083.8	ENSG00000196083.8	IL1RAP	chr3:190514050-190659750	Ctrl	siHIF1A	OK	8.91102	2.93506	-1.6022	-3.83469	5e-05	0.000604383	yes
ENSG00000196152.9	ENSG00000196152.9	ZNF79	chr9:127424373-127445372	Ctrl	siHIF1A	OK	3.66474	5.38202	0.554439	1.82689	5e-05	0.000604383	yes
ENSG00000196159.10	ENSG00000196159.10	FAT4	chr4:125316398-125492932	Ctrl	siHIF1A	OK	13.6858	10.2361	-0.419019	-1.11389	5e-05	0.000604383	yes
ENSG00000196169.13	ENSG00000196169.13	KIF19	chr17:74326209-74355820	Ctrl	siHIF1A	OK	1.69864	3.32476	0.968868	2.26228	5e-05	0.000604383	yes
ENSG00000196182.9	ENSG00000196182.9	STK40	chr1:36339623-36385896	Ctrl	siHIF1A	OK	7.48438	11.4842	0.6177	1.85356	5e-05	0.000604383	yes
ENSG00000196368.4	ENSG00000196368.4	NUDT11	chrX:51490010-51496596	Ctrl	siHIF1A	OK	4.15162	2.3712	-0.808058	-2.2783	5e-05	0.000604383	yes
ENSG00000196417.11	ENSG00000196417.11	ZNF765	chr19:53330674-53430413	Ctrl	siHIF1A	OK	2.58893	4.49662	0.796483	1.34324	5e-05	0.000604383	yes
ENSG00000196468.7	ENSG00000196468.7	FGF16	chrX:77447404-77457278	Ctrl	siHIF1A	OK	0.431827	1.38637	1.68279	2.84762	5e-05	0.000604383	yes
ENSG00000196476.10	ENSG00000196476.10	C20orf96	chr20:270862-290778	Ctrl	siHIF1A	OK	2.4642	1.42478	-0.790382	-1.85751	5e-05	0.000604383	yes
ENSG00000196549.9	ENSG00000196549.9	MME	chr3:155024123-155183729	Ctrl	siHIF1A	OK	16.1751	7.27733	-1.1523	-2.66795	5e-05	0.000604383	yes
ENSG00000196652.10	ENSG00000196652.10	ZKSCAN5	chr7:99504650-99534700	Ctrl	siHIF1A	OK	3.10563	4.23326	0.446882	1.58372	5e-05	0.000604383	yes
ENSG00000196653.10	ENSG00000196653.10	ZNF502	chr3:44712642-44723831	Ctrl	siHIF1A	OK	1.09968	1.66587	0.599187	1.48731	5e-05	0.000604383	yes
ENSG00000196747.4	ENSG00000196747.4	HIST1H2AI	chr6:27808198-27808701	Ctrl	siHIF1A	OK	27.2481	16.5225	-0.721728	-2.15881	5e-05	0.000604383	yes
ENSG00000196782.11	ENSG00000196782.11	MAML3	chr4:139665767-140154184	Ctrl	siHIF1A	OK	8.54271	4.25328	-1.00612	-1.9046	5e-05	0.000604383	yes
ENSG00000196787.3	ENSG00000196787.3	HIST1H2AG	chr6:27133041-27135291	Ctrl	siHIF1A	OK	10.0566	7.21924	-0.478229	-1.69365	5e-05	0.000604383	yes
ENSG00000196821.8	ENSG00000196821.8	C6orf106	chr6:34587287-34697470	Ctrl	siHIF1A	OK	13.7682	22.1675	0.687101	2.77625	5e-05	0.000604383	yes
ENSG00000196850.5	ENSG00000196850.5	PPTC7	chr12:110533244-110583320	Ctrl	siHIF1A	OK	7.20893	5.11002	-0.496456	-1.7251	5e-05	0.000604383	yes
ENSG00000196937.9	ENSG00000196937.9	FAM3C	chr7:121348850-121396364	Ctrl	siHIF1A	OK	30.5941	21.2913	-0.522988	-1.72557	5e-05	0.000604383	yes
ENSG00000197043.12	ENSG00000197043.12	ANXA6	chr5:151100711-151157882	Ctrl	siHIF1A	OK	74.9677	110.027	0.55352	1.83589	5e-05	0.000604383	yes
ENSG00000197045.11	ENSG00000197045.11	GMFB	chr14:54474483-54489196	Ctrl	siHIF1A	OK	32.8741	22.6947	-0.534593	-1.38879	5e-05	0.000604383	yes
ENSG00000197083.10	ENSG00000197083.10	ZNF300P1	chr5:150930644-150946289	Ctrl	siHIF1A	OK	0.380941	0.714195	0.906749	1.82785	5e-05	0.000604383	yes
ENSG00000197140.13	ENSG00000197140.13	ADAM32	chr8:39106989-39284911	Ctrl	siHIF1A	OK	2.13218	0.604956	-1.81742	-1.82556	5e-05	0.000604383	yes
ENSG00000197238.4	ENSG00000197238.4	HIST1H4J	chr6:27824107-27824480	Ctrl	siHIF1A	OK	240.933	176.333	-0.450328	-1.76709	5e-05	0.000604383	yes
ENSG00000197261.10	ENSG00000197261.10	C6orf141	chr6:49550645-49561907	Ctrl	siHIF1A	OK	5.13694	12.975	1.33675	3.25394	5e-05	0.000604383	yes
ENSG00000197409.7	ENSG00000197409.7	HIST1H3D	chr6:26196839-26197250	Ctrl	siHIF1A	OK	45.3753	27.472	-0.723946	-2.19778	5e-05	0.000604383	yes
ENSG00000197461.12	ENSG00000197461.12	PDGFA	chr7:497257-520296	Ctrl	siHIF1A	OK	26.3209	16.5657	-0.668011	-2.42948	5e-05	0.000604383	yes
ENSG00000197467.12	ENSG00000197467.12	COL13A1	chr10:69801930-69964275	Ctrl	siHIF1A	OK	14.5805	24.442	0.74532	2.00063	5e-05	0.000604383	yes
ENSG00000197535.13	ENSG00000197535.13	MYO5A	chr15:52307282-52529050	Ctrl	siHIF1A	OK	19.05	27.3962	0.524185	1.29205	5e-05	0.000604383	yes
ENSG00000197550.3	ENSG00000197550.3	RP11-460N11.2	chr9:64817869-64836341	Ctrl	siHIF1A	OK	4.15194	6.10348	0.555847	2.00215	5e-05	0.000604383	yes
ENSG00000197565.14	ENSG00000197565.14	COL4A6	chrX:108155606-108439497	Ctrl	siHIF1A	OK	3.11358	5.43442	0.803551	2.02017	5e-05	0.000604383	yes
ENSG00000197594.10	ENSG00000197594.10	ENPP1	chr6:131808015-131895155	Ctrl	siHIF1A	OK	1.10479	0.596282	-0.889706	-1.77752	5e-05	0.000604383	yes
ENSG00000197632.7	ENSG00000197632.7	SERPINB2	chr18:63871691-63936111	Ctrl	siHIF1A	OK	4.28296	2.15946	-0.987937	-2.63539	5e-05	0.000604383	yes
ENSG00000197696.8	ENSG00000197696.8	NMB	chr15:84655128-84658563	Ctrl	siHIF1A	OK	6.33143	3.58806	-0.819327	-2.02094	5e-05	0.000604383	yes
ENSG00000197747.7	ENSG00000197747.7	S100A10	chr1:151982914-151994390	Ctrl	siHIF1A	OK	168.474	248.587	0.561223	2.19326	5e-05	0.000604383	yes
ENSG00000197872.10	ENSG00000197872.10	FAM49A	chr2:16549458-16666331	Ctrl	siHIF1A	OK	10.6042	16.4517	0.633602	2.01761	5e-05	0.000604383	yes
ENSG00000197905.7	ENSG00000197905.7	TEAD4	chr12:2959329-3040673	Ctrl	siHIF1A	OK	13.7634	23.2502	0.756409	2.18196	5e-05	0.000604383	yes
ENSG00000197956.8	ENSG00000197956.8	S100A6	chr1:153533602-153536244	Ctrl	siHIF1A	OK	903.482	1353.65	0.583292	2.20993	5e-05	0.000604383	yes
ENSG00000198040.9	ENSG00000198040.9	ZNF84	chr12:133037291-133063304	Ctrl	siHIF1A	OK	9.13699	14.1265	0.628618	1.59562	5e-05	0.000604383	yes
ENSG00000198053.10	ENSG00000198053.10	SIRPA	chr20:1888127-1940592	Ctrl	siHIF1A	OK	19.6449	13.8443	-0.504867	-2.03595	5e-05	0.000604383	yes
ENSG00000198075.8	ENSG00000198075.8	SULT1C4	chr2:108377910-108388057	Ctrl	siHIF1A	OK	2.63764	0.961487	-1.45591	-3.09207	5e-05	0.000604383	yes
ENSG00000198113.2	ENSG00000198113.2	TOR4A	chr9:137277748-137282641	Ctrl	siHIF1A	OK	11.8295	16.4896	0.479163	1.87747	5e-05	0.000604383	yes
ENSG00000198142.4	ENSG00000198142.4	SOWAHC	chr2:109614333-109618990	Ctrl	siHIF1A	OK	2.73569	1.50385	-0.863242	-2.64615	5e-05	0.000604383	yes
ENSG00000198336.8	ENSG00000198336.8	MYL4	chr17:47200445-47223679	Ctrl	siHIF1A	OK	0.241981	0.611441	1.33732	0.754966	5e-05	0.000604383	yes
ENSG00000198355.4	ENSG00000198355.4	PIM3	chr22:49960512-49964080	Ctrl	siHIF1A	OK	76.815	99.6857	0.375998	1.53005	5e-05	0.000604383	yes
ENSG00000198535.5	ENSG00000198535.5	C2CD4A	chr15:62066976-62070917	Ctrl	siHIF1A	OK	1.22658	0.289345	-2.08377	-3.77335	5e-05	0.000604383	yes
ENSG00000198542.12	ENSG00000198542.12	ITGBL1	chr13:101452592-102402457	Ctrl	siHIF1A	OK	5.23881	9.77864	0.900395	2.08416	5e-05	0.000604383	yes
ENSG00000198576.3	ENSG00000198576.3	ARC	chr8:142611043-142614472	Ctrl	siHIF1A	OK	0.615222	0.163458	-1.91219	-1.32072	5e-05	0.000604383	yes
ENSG00000198624.11	ENSG00000198624.11	CCDC69	chr5:151181051-151270440	Ctrl	siHIF1A	OK	3.65373	9.57285	1.38958	1.52879	5e-05	0.000604383	yes
ENSG00000198648.9	ENSG00000198648.9	STK39	chr2:167954019-168248141	Ctrl	siHIF1A	OK	4.033	2.15329	-0.905309	-2.71567	5e-05	0.000604383	yes
ENSG00000198682.11	ENSG00000198682.11	PAPSS2	chr10:87607984-87747705	Ctrl	siHIF1A	OK	18.3421	30.1578	0.71737	2.64909	5e-05	0.000604383	yes
ENSG00000198722.11	ENSG00000198722.11	UNC13B	chr9:35161991-35405338	Ctrl	siHIF1A	OK	11.6956	17.6477	0.593513	2.37162	5e-05	0.000604383	yes
ENSG00000198727.2	ENSG00000198727.2	MT-CYB	chrM:14746-15887	Ctrl	siHIF1A	OK	276.397	151.927	-0.863359	-2.73976	5e-05	0.000604383	yes
ENSG00000198763.3	ENSG00000198763.3	MT-ND2	chrM:4469-5511	Ctrl	siHIF1A	OK	47.436	29.742	-0.67348	-2.20819	5e-05	0.000604383	yes
ENSG00000198768.9	ENSG00000198768.9	APCDD1L	chr20:58459100-58515131	Ctrl	siHIF1A	OK	2.38353	1.21337	-0.974083	-1.61298	5e-05	0.000604383	yes
ENSG00000198786.2	ENSG00000198786.2	MT-ND5	chrM:12336-14148	Ctrl	siHIF1A	OK	107.905	40.3328	-1.41974	-4.19385	5e-05	0.000604383	yes
ENSG00000198818.8	ENSG00000198818.8	SFT2D1	chr6:166319727-166342591	Ctrl	siHIF1A	OK	24.5558	17.0386	-0.52726	-1.75797	5e-05	0.000604383	yes
ENSG00000198826.9	ENSG00000198826.9	ARHGAP11A	chr15:32519847-32639949	Ctrl	siHIF1A	OK	5.85695	3.41246	-0.779334	-1.26242	5e-05	0.000604383	yes
ENSG00000198833.6	ENSG00000198833.6	UBE2J1	chr6:89326624-89352848	Ctrl	siHIF1A	OK	46.3873	33.6818	-0.461762	-1.91532	5e-05	0.000604383	yes
ENSG00000198853.10	ENSG00000198853.10	RUSC2	chr9:35490126-35563899	Ctrl	siHIF1A	OK	10.4778	14.6442	0.482992	1.88556	5e-05	0.000604383	yes
ENSG00000198885.8	ENSG00000198885.8	ITPRIPL1	chr2:96325330-96330517	Ctrl	siHIF1A	OK	0.726588	0.30873	-1.23479	-1.71535	5e-05	0.000604383	yes
ENSG00000198886.2	ENSG00000198886.2	MT-ND4	chrM:10469-12137	Ctrl	siHIF1A	OK	236.512	113.28	-1.06203	-3.17592	5e-05	0.000604383	yes
ENSG00000198888.2	ENSG00000198888.2	MT-ND1	chrM:3306-4262	Ctrl	siHIF1A	OK	49.697	27.0496	-0.877554	-2.70914	5e-05	0.000604383	yes
ENSG00000198890.7	ENSG00000198890.7	PRMT6	chr1:107056678-107059294	Ctrl	siHIF1A	OK	3.45851	6.71007	0.956176	3.0589	5e-05	0.000604383	yes
ENSG00000198901.12	ENSG00000198901.12	PRC1	chr15:90966037-90995629	Ctrl	siHIF1A	OK	11.1806	7.15844	-0.643277	-1.69364	5e-05	0.000604383	yes
ENSG00000203727.3	ENSG00000203727.3	SAMD5	chr6:147508926-147953937	Ctrl	siHIF1A	OK	1.93933	0.805436	-1.26772	-2.01484	5e-05	0.000604383	yes
ENSG00000203805.9	ENSG00000203805.9	PPAPDC1A	chr10:120456953-120589855	Ctrl	siHIF1A	OK	16.3514	7.06369	-1.21092	-3.28669	5e-05	0.000604383	yes
ENSG00000204104.10	ENSG00000204104.10	TRAF3IP1	chr2:238320440-238400900	Ctrl	siHIF1A	OK	2.34684	3.57743	0.608202	1.66562	5e-05	0.000604383	yes
ENSG00000204116.10	ENSG00000204116.10	CHIC1	chrX:73563199-73687102	Ctrl	siHIF1A	OK	6.52435	3.33309	-0.968976	-2.99729	5e-05	0.000604383	yes
ENSG00000204149.8	ENSG00000204149.8	AGAP6	chr10:49982189-50010499	Ctrl	siHIF1A	OK	2.80777	3.98097	0.503695	1.61072	5e-05	0.000604383	yes
ENSG00000204160.10	ENSG00000204160.10	ZDHHC18	chr1:26826709-26857602	Ctrl	siHIF1A	OK	5.16531	9.95181	0.946104	1.79327	5e-05	0.000604383	yes
ENSG00000204186.6	ENSG00000204186.6	ZDBF2	chr2:206274662-206314428	Ctrl	siHIF1A	OK	5.84923	3.43846	-0.766484	-3.03756	5e-05	0.000604383	yes
ENSG00000204262.10	ENSG00000204262.10	COL5A2	chr2:189031895-189179879	Ctrl	siHIF1A	OK	44.4963	65.2002	0.55119	2.05325	5e-05	0.000604383	yes
ENSG00000204264.7	ENSG00000204264.7	PSMB8	chr6:32840716-32859585	Ctrl	siHIF1A	OK	25.8362	48.8461	0.918848	1.82464	5e-05	0.000604383	yes
ENSG00000204301.6	ENSG00000204301.6	NOTCH4	chr6:32190765-32224067	Ctrl	siHIF1A	OK	40.8943	26.4635	-0.627897	-1.82602	5e-05	0.000604383	yes
ENSG00000204381.10	ENSG00000204381.10	LAYN	chr11:111540279-111561745	Ctrl	siHIF1A	OK	1.49156	0.492872	-1.59754	-2.02353	5e-05	0.000604383	yes
ENSG00000204397.6	ENSG00000204397.6	CARD16	chr11:105041325-105101431	Ctrl	siHIF1A	OK	30.9842	51.3627	0.729187	2.5714	5e-05	0.000604383	yes
ENSG00000204439.3	ENSG00000204439.3	C6orf47	chr6:31658297-31660772	Ctrl	siHIF1A	OK	4.31953	6.25942	0.535154	1.71069	5e-05	0.000604383	yes
ENSG00000204520.11	ENSG00000204520.11	MICA	chr6:31399783-31477506	Ctrl	siHIF1A	OK	31.7239	20.9936	-0.595622	-2.21359	5e-05	0.000604383	yes
ENSG00000204524.6	ENSG00000204524.6	ZNF805	chr19:57240684-57255135	Ctrl	siHIF1A	OK	3.01848	4.62074	0.6143	1.91842	5e-05	0.000604383	yes
ENSG00000204525.13	ENSG00000204525.13	HLA-C	chr6:31268748-31357637	Ctrl	siHIF1A	OK	189.527	398.392	1.07178	2.05688	5e-05	0.000604383	yes
ENSG00000204539.3	ENSG00000204539.3	CDSN	chr6:31114749-31140092	Ctrl	siHIF1A	OK	2.08894	1.26218	-0.726849	-1.56089	5e-05	0.000604383	yes
ENSG00000204580.10	ENSG00000204580.10	DDR1	chr6:30876420-30900156	Ctrl	siHIF1A	OK	10.7612	7.35586	-0.548869	-1.19472	5e-05	0.000604383	yes
ENSG00000204611.5	ENSG00000204611.5	ZNF616	chr19:52113090-52177002	Ctrl	siHIF1A	OK	1.22955	3.90147	1.66589	2.44081	5e-05	0.000604383	yes
ENSG00000204682.5	ENSG00000204682.5	CASC10	chr10:21492657-21497262	Ctrl	siHIF1A	OK	0.82608	2.0544	1.31436	3.30455	5e-05	0.000604383	yes
ENSG00000204767.3	ENSG00000204767.3	FAM196B	chr5:169637246-170083382	Ctrl	siHIF1A	OK	4.92178	3.28757	-0.582158	-1.73727	5e-05	0.000604383	yes
ENSG00000204876.4	ENSG00000204876.4	AC021218.2	chr7:155962631-155966343	Ctrl	siHIF1A	OK	0.646199	0.297341	-1.11986	-1.8966	5e-05	0.000604383	yes
ENSG00000205213.12	ENSG00000205213.12	LGR4	chr11:27365960-27482433	Ctrl	siHIF1A	OK	7.76851	3.52277	-1.14093	-3.08745	5e-05	0.000604383	yes
ENSG00000205269.5	ENSG00000205269.5	TMEM170B	chr6:11538277-11583524	Ctrl	siHIF1A	OK	1.64695	0.890872	-0.886502	-2.72503	5e-05	0.000604383	yes
ENSG00000205336.10	ENSG00000205336.10	GPR56	chr16:57610651-57665580	Ctrl	siHIF1A	OK	22.2784	41.3448	0.892062	2.39083	5e-05	0.000604383	yes
ENSG00000205364.3	ENSG00000205364.3	MT1M	chr16:56632232-56633986	Ctrl	siHIF1A	OK	0.670521	2.18918	1.70704	1.93198	5e-05	0.000604383	yes
ENSG00000205413.6	ENSG00000205413.6	SAMD9	chr7:93099512-93118023	Ctrl	siHIF1A	OK	6.0295	12.7765	1.08339	4.13126	5e-05	0.000604383	yes
ENSG00000205978.5	ENSG00000205978.5	NYNRIN	chr14:24398785-24419288	Ctrl	siHIF1A	OK	8.28525	5.6453	-0.553494	-1.70828	5e-05	0.000604383	yes
ENSG00000206503.10	ENSG00000206503.10	HLA-A	chr6:29941259-29945884	Ctrl	siHIF1A	OK	171.608	306.572	0.837107	2.95636	5e-05	0.000604383	yes
ENSG00000206560.9	ENSG00000206560.9	ANKRD28	chr3:15667235-15859771	Ctrl	siHIF1A	OK	30.4889	54.5883	0.840309	2.07998	5e-05	0.000604383	yes
ENSG00000213160.8	ENSG00000213160.8	KLHL23	chr2:169694453-169776989	Ctrl	siHIF1A	OK	4.26306	2.37077	-0.846532	-1.9315	5e-05	0.000604383	yes
ENSG00000213222.3	ENSG00000213222.3	AC093724.2	chr2:131722374-131767404	Ctrl	siHIF1A	OK	19.0083	5.75351	-1.72412	-4.46258	5e-05	0.000604383	yes
ENSG00000213390.9	ENSG00000213390.9	ARHGAP19	chr10:96998037-97292673	Ctrl	siHIF1A	OK	2.82735	4.35123	0.62197	1.7623	5e-05	0.000604383	yes
ENSG00000213585.9	ENSG00000213585.9	VDAC1	chr5:133971914-134005133	Ctrl	siHIF1A	OK	144.589	90.3661	-0.678108	-2.74313	5e-05	0.000604383	yes
ENSG00000213799.9	ENSG00000213799.9	ZNF845	chr19:53330674-53430413	Ctrl	siHIF1A	OK	1.54642	3.57552	1.20922	2.14456	5e-05	0.000604383	yes
ENSG00000213965.3	ENSG00000213965.3	NUDT19	chr19:32691960-32713796	Ctrl	siHIF1A	OK	6.98722	4.16883	-0.745077	-2.45036	5e-05	0.000604383	yes
ENSG00000214110.3	ENSG00000214110.3	LDHAP4	chr9:14921336-14922334	Ctrl	siHIF1A	OK	2.65435	0.997579	-1.41186	-2.75687	5e-05	0.000604383	yes
ENSG00000215114.6	ENSG00000215114.6	UBXN2B	chr8:58411263-58451501	Ctrl	siHIF1A	OK	4.37656	2.59765	-0.752588	-1.97494	5e-05	0.000604383	yes
ENSG00000215447.6	ENSG00000215447.6	BX322557.10	chr21:45288051-45291738	Ctrl	siHIF1A	OK	6.09595	11.0685	0.860539	1.91949	5e-05	0.000604383	yes
ENSG00000218336.6	ENSG00000218336.6	TENM3	chr4:181874437-182803024	Ctrl	siHIF1A	OK	3.42329	8.23036	1.26557	3.08065	5e-05	0.000604383	yes
ENSG00000218537.1	ENSG00000218537.1	MIF-AS1	chr22:23856426-23898930	Ctrl	siHIF1A	OK	43.4546	23.1421	-0.90899	-2.3893	5e-05	0.000604383	yes
ENSG00000220785.6	ENSG00000220785.6	MTMR9LP	chr1:32231657-32241620	Ctrl	siHIF1A	OK	16.2919	25.0698	0.621792	2.25767	5e-05	0.000604383	yes
ENSG00000221823.9	ENSG00000221823.9	PPP3R1	chr2:68122935-68261230	Ctrl	siHIF1A	OK	16.8856	9.94063	-0.76438	-1.92569	5e-05	0.000604383	yes
ENSG00000221866.8	ENSG00000221866.8	PLXNA4	chr7:132123331-132648688	Ctrl	siHIF1A	OK	2.57047	4.7266	0.878774	2.08013	5e-05	0.000604383	yes
ENSG00000221926.10	ENSG00000221926.10	TRIM16	chr17:15565482-15684311	Ctrl	siHIF1A	OK	37.5157	18.5931	-1.01272	-3.32172	5e-05	0.000604383	yes
ENSG00000223749.6	ENSG00000223749.6	MIR503HG	chrX:134543336-134546721	Ctrl	siHIF1A	OK	17.7376	7.59743	-1.22323	-3.11748	5e-05	0.000604383	yes
ENSG00000223768.1	ENSG00000223768.1	LINC00205	chr21:45293284-45297354	Ctrl	siHIF1A	OK	4.79262	7.89482	0.720092	2.05836	5e-05	0.000604383	yes
ENSG00000223891.4	ENSG00000223891.4	OSER1-AS1	chr20:44210959-44226027	Ctrl	siHIF1A	OK	3.1365	1.83586	-0.772703	-1.62482	5e-05	0.000604383	yes
ENSG00000224531.5	ENSG00000224531.5	SMIM13	chr6:11094032-11138733	Ctrl	siHIF1A	OK	10.9507	4.98434	-1.13555	-3.91184	5e-05	0.000604383	yes
ENSG00000224982.3	ENSG00000224982.3	TMEM233	chr12:119334711-119681630	Ctrl	siHIF1A	OK	2.45679	0.717384	-1.77595	-1.42229	5e-05	0.000604383	yes
ENSG00000227507.2	ENSG00000227507.2	LTB	chr6:31580524-31582522	Ctrl	siHIF1A	OK	6.61415	2.91512	-1.182	-2.6801	5e-05	0.000604383	yes
ENSG00000228495.1	ENSG00000228495.1	LINC01013	chr6:132131914-132169374	Ctrl	siHIF1A	OK	36.2329	73.2451	1.01543	3.69225	5e-05	0.000604383	yes
ENSG00000228863.7	ENSG00000228863.7	RP11-404F10.2	chr1:160670147-160711851	Ctrl	siHIF1A	OK	0.83348	1.77732	1.09248	1.48642	5e-05	0.000604383	yes
ENSG00000230438.6	ENSG00000230438.6	SERPINB9P1	chr6:2854656-2881407	Ctrl	siHIF1A	OK	2.94915	5.86658	0.992221	2.65526	5e-05	0.000604383	yes
ENSG00000230606.9	ENSG00000230606.9	AC159540.1	chr2:97416164-97434847	Ctrl	siHIF1A	OK	7.37812	10.7715	0.545899	1.57967	5e-05	0.000604383	yes
ENSG00000231025.1	ENSG00000231025.1	RP11-175O19.4	chr10:96992449-96995959	Ctrl	siHIF1A	OK	1.52496	2.36456	0.632804	1.73285	5e-05	0.000604383	yes
ENSG00000231298.5	ENSG00000231298.5	LINC00704	chr10:4650184-4678154	Ctrl	siHIF1A	OK	17.9032	25.5732	0.514412	1.59763	5e-05	0.000604383	yes
ENSG00000231345.3	ENSG00000231345.3	BEND3P1	chr10:50655966-50660472	Ctrl	siHIF1A	OK	0.521142	0.116794	-2.15771	-2.73726	5e-05	0.000604383	yes
ENSG00000232517.2	ENSG00000232517.2	AC112198.1	chr5:54808209-54872551	Ctrl	siHIF1A	OK	1.06311	0.130679	-3.02419	-6.48877	5e-05	0.000604383	yes
ENSG00000233817.1	ENSG00000233817.1	RP11-168K11.3	chr9:113619227-113622634	Ctrl	siHIF1A	OK	0.774891	0.25476	-1.60485	-2.75246	5e-05	0.000604383	yes
ENSG00000233913.7	ENSG00000233913.7	CTC-575D19.1	chr5:168616351-168616996	Ctrl	siHIF1A	OK	14.8583	9.64552	-0.623343	-1.77769	5e-05	0.000604383	yes
ENSG00000234127.7	ENSG00000234127.7	TRIM26	chr6:30184454-30213427	Ctrl	siHIF1A	OK	7.71426	12.4059	0.68543	1.97325	5e-05	0.000604383	yes
ENSG00000234745.8	ENSG00000234745.8	HLA-B	chr6:31268748-31357637	Ctrl	siHIF1A	OK	235.629	537.408	1.1895	2.75608	5e-05	0.000604383	yes
ENSG00000234883.3	ENSG00000234883.3	MIR155HG	chr21:25561908-25575168	Ctrl	siHIF1A	OK	3.85784	1.89864	-1.02283	-2.48052	5e-05	0.000604383	yes
ENSG00000235505.6	ENSG00000235505.6	RP11-693N9.2	chr11:104901548-104919073	Ctrl	siHIF1A	OK	17.3343	26.8134	0.629322	1.55875	5e-05	0.000604383	yes
ENSG00000235750.8	ENSG00000235750.8	KIAA0040	chr1:175156986-175192999	Ctrl	siHIF1A	OK	5.53927	2.5437	-1.12277	-2.35588	5e-05	0.000604383	yes
ENSG00000236824.1	ENSG00000236824.1	BCYRN1	chr2:47192404-47345074	Ctrl	siHIF1A	OK	1.69888	0.944385	-0.847139	-2.98454	5e-05	0.000604383	yes
ENSG00000237550.5	ENSG00000237550.5	UBE2Q2P6	chr15:82355141-82439153	Ctrl	siHIF1A	OK	302.05	221.039	-0.450482	-1.79676	5e-05	0.000604383	yes
ENSG00000237989.1	ENSG00000237989.1	AP001046.5	chr21:43358146-43362349	Ctrl	siHIF1A	OK	0.582858	0.104915	-2.47392	-3.15937	5e-05	0.000604383	yes
ENSG00000240583.9	ENSG00000240583.9	AQP1	chr7:30651942-30925516	Ctrl	siHIF1A	OK	6.05859	1.78255	-1.76504	-2.9863	5e-05	0.000604383	yes
ENSG00000240972.1	ENSG00000240972.1	MIF	chr22:23856426-23898930	Ctrl	siHIF1A	OK	66.7788	37.3803	-0.837111	-1.95448	5e-05	0.000604383	yes
ENSG00000242539.2	ENSG00000242539.2	AC007620.3	chr3:179396088-179451590	Ctrl	siHIF1A	OK	33.92	15.5168	-1.12831	-1.87695	5e-05	0.000604383	yes
ENSG00000242779.5	ENSG00000242779.5	ZNF702P	chr19:52927134-53037898	Ctrl	siHIF1A	OK	4.93165	16.9226	1.77881	3.96649	5e-05	0.000604383	yes
ENSG00000243137.6	ENSG00000243137.6	PSG4	chr19:43192701-43207299	Ctrl	siHIF1A	OK	9.49358	30.0623	1.66293	4.7906	5e-05	0.000604383	yes
ENSG00000243244.4	ENSG00000243244.4	STON1	chr2:48529382-48776517	Ctrl	siHIF1A	OK	4.38042	2.69288	-0.701917	-2.16331	5e-05	0.000604383	yes
ENSG00000243649.7	ENSG00000243649.7	CFB	chr6:31897784-31952084	Ctrl	siHIF1A	OK	2.53896	7.3411	1.53176	2.3495	5e-05	0.000604383	yes
ENSG00000246898.1	ENSG00000246898.1	LINC00920	chr16:66408523-66412135	Ctrl	siHIF1A	OK	0.903577	0.374537	-1.27054	-2.25615	5e-05	0.000604383	yes
ENSG00000247095.2	ENSG00000247095.2	MIR210HG	chr11:565659-568457	Ctrl	siHIF1A	OK	10.9252	2.5007	-2.12726	-3.97713	5e-05	0.000604383	yes
ENSG00000247315.3	ENSG00000247315.3	ZCCHC3	chr20:296967-300321	Ctrl	siHIF1A	OK	4.80587	8.82897	0.877449	3.11019	5e-05	0.000604383	yes
ENSG00000248187.1	ENSG00000248187.1	RP11-184M15.1	chr4:128567971-128570531	Ctrl	siHIF1A	OK	0.917555	2.47173	1.42965	3.07369	5e-05	0.000604383	yes
ENSG00000248323.4	ENSG00000248323.4	LUCAT1	chr5:91303028-91314402	Ctrl	siHIF1A	OK	2.72937	1.09483	-1.31786	-2.11205	5e-05	0.000604383	yes
ENSG00000249867.4	ENSG00000249867.4	RP11-115J23.1	chr11:28702614-29063821	Ctrl	siHIF1A	OK	3.98705	1.72589	-1.20799	-2.43193	5e-05	0.000604383	yes
ENSG00000249992.1	ENSG00000249992.1	TMEM158	chr3:45224465-45226278	Ctrl	siHIF1A	OK	5.13194	1.49947	-1.77505	-3.61291	5e-05	0.000604383	yes
ENSG00000250899.3	ENSG00000250899.3	RP11-253E3.3	chr12:3041436-3044950	Ctrl	siHIF1A	OK	1.08104	2.10521	0.961539	2.66523	5e-05	0.000604383	yes
ENSG00000250961.1	ENSG00000250961.1	CTD-2023N9.1	chr5:57395059-57533424	Ctrl	siHIF1A	OK	1.47243	0.563124	-1.38667	-2.14348	5e-05	0.000604383	yes
ENSG00000253276.2	ENSG00000253276.2	CCDC71L	chr7:106372250-106770207	Ctrl	siHIF1A	OK	33.455	46.3102	0.469109	1.60485	5e-05	0.000604383	yes
ENSG00000253522.3	ENSG00000253522.3	CTC-231O11.1	chr5:160468267-160487426	Ctrl	siHIF1A	OK	3.98891	1.7701	-1.17217	-3.24774	5e-05	0.000604383	yes
ENSG00000254469.6	ENSG00000254469.6	RP11-849H4.2	chr11:71865508-71928654	Ctrl	siHIF1A	OK	1.40468	3.0604	1.12348	1.56894	5e-05	0.000604383	yes
ENSG00000254486.1	ENSG00000254486.1	RP13-631K18.2	chr11:12030874-12061785	Ctrl	siHIF1A	OK	0.572077	1.44712	1.33891	3.09086	5e-05	0.000604383	yes
ENSG00000254827.4	ENSG00000254827.4	SLC22A18AS	chr11:2887779-2925246	Ctrl	siHIF1A	OK	1.44135	0.475471	-1.59999	-1.58472	5e-05	0.000604383	yes
ENSG00000254838.5	ENSG00000254838.5	GVINP1	chr11:6713535-6746439	Ctrl	siHIF1A	OK	1.52482	0.815497	-0.902885	-2.96684	5e-05	0.000604383	yes
ENSG00000256043.2	ENSG00000256043.2	CTSO	chr4:155924117-155953917	Ctrl	siHIF1A	OK	2.99118	4.80333	0.683319	2.18511	5e-05	0.000604383	yes
ENSG00000256235.1	ENSG00000256235.1	SMIM3	chr5:150777945-150796734	Ctrl	siHIF1A	OK	2.51826	1.01678	-1.30842	-3.1759	5e-05	0.000604383	yes
ENSG00000257207.5	ENSG00000257207.5	AC108938.5	chr2:110386376-110473075	Ctrl	siHIF1A	OK	3.59993	1.68305	-1.09689	-3.27869	5e-05	0.000604383	yes
ENSG00000257267.2	ENSG00000257267.2	ZNF271P	chr18:35290281-35310766	Ctrl	siHIF1A	OK	5.14559	8.52147	0.727767	2.3279	5e-05	0.000604383	yes
ENSG00000258943.1	ENSG00000258943.1	RP11-696D21.2	chr14:63298125-63299547	Ctrl	siHIF1A	OK	2.01315	0.499876	-2.00981	-2.83826	5e-05	0.000604383	yes
ENSG00000258976.1	ENSG00000258976.1	CTD-2207P18.2	chr14:74614692-74616647	Ctrl	siHIF1A	OK	3.43347	1.61539	-1.08779	-2.03467	5e-05	0.000604383	yes
ENSG00000259518.1	ENSG00000259518.1	LINC01583	chr15:82088593-82097694	Ctrl	siHIF1A	OK	1.25428	0.213504	-2.55453	-1.726	5e-05	0.000604383	yes
ENSG00000260314.2	ENSG00000260314.2	MRC1	chr10:17809343-17911170	Ctrl	siHIF1A	OK	8.43987	13.3171	0.657982	2.592	5e-05	0.000604383	yes
ENSG00000260329.1	ENSG00000260329.1	RP11-412D9.4	chr12:106954028-106955497	Ctrl	siHIF1A	OK	0.287443	0.75048	1.38453	1.87296	5e-05	0.000604383	yes
ENSG00000260549.1	ENSG00000260549.1	MT1L	chr16:56617475-56618818	Ctrl	siHIF1A	OK	21.1952	50.8875	1.26358	3.65699	5e-05	0.000604383	yes
ENSG00000260604.2	ENSG00000260604.2	RP1-140K8.5	chr6:3904919-3911979	Ctrl	siHIF1A	OK	3.34914	6.67997	0.996051	3.83624	5e-05	0.000604383	yes
ENSG00000260804.3	ENSG00000260804.3	PKI55	chr2:216217044-216220192	Ctrl	siHIF1A	OK	1.13301	1.82506	0.68779	1.77325	5e-05	0.000604383	yes
ENSG00000261051.1	ENSG00000261051.1	RP11-274H2.5	chr3:146059584-146061679	Ctrl	siHIF1A	OK	7.5204	3.69224	-1.02632	-3.13674	5e-05	0.000604383	yes
ENSG00000261269.1	ENSG00000261269.1	RP11-389C8.2	chr5:72439902-72442387	Ctrl	siHIF1A	OK	0.93134	2.2552	1.27587	3.06315	5e-05	0.000604383	yes
ENSG00000261578.1	ENSG00000261578.1	RP11-21L23.2	chr11:76800363-76804555	Ctrl	siHIF1A	OK	0.62725	0.193271	-1.69841	-3.06526	5e-05	0.000604383	yes
ENSG00000261609.3	ENSG00000261609.3	GAN	chr16:81314951-81390884	Ctrl	siHIF1A	OK	3.55445	2.62756	-0.435901	-1.49233	5e-05	0.000604383	yes
ENSG00000263426.2	ENSG00000263426.2	RN7SL471P	chr6:28977474-28977773	Ctrl	siHIF1A	OK	29.4849	9.10566	-1.69514	-3.44184	5e-05	0.000604383	yes
ENSG00000265107.2	ENSG00000265107.2	GJA5	chr1:147756198-147773362	Ctrl	siHIF1A	OK	2.76832	0.213382	-3.6975	-4.4631	5e-05	0.000604383	yes
ENSG00000266835.4	ENSG00000266835.4	LINC01540	chr18:3466249-3478978	Ctrl	siHIF1A	OK	15.9008	9.03634	-0.815286	-2.09956	5e-05	0.000604383	yes
ENSG00000267100.1	ENSG00000267100.1	ILF3-AS1	chr19:10651861-10653844	Ctrl	siHIF1A	OK	1.73932	3.5295	1.02094	2.70439	5e-05	0.000604383	yes
ENSG00000267248.1	ENSG00000267248.1	CTD-2319I12.4	chr17:60126534-60135644	Ctrl	siHIF1A	OK	1.97884	3.7113	0.907266	1.86346	5e-05	0.000604383	yes
ENSG00000269926.1	ENSG00000269926.1	RP11-442H21.2	chr10:72273919-72276036	Ctrl	siHIF1A	OK	126.16	76.7811	-0.716436	-2.0045	5e-05	0.000604383	yes
ENSG00000269973.1	ENSG00000269973.1	RP11-95D17.1	chr2:9936359-9939590	Ctrl	siHIF1A	OK	1.22173	0.732431	-0.738166	-1.72663	5e-05	0.000604383	yes
ENSG00000270547.4	ENSG00000270547.4	LINC01235	chr9:13406379-13433053	Ctrl	siHIF1A	OK	7.56754	24.1583	1.67462	2.90488	5e-05	0.000604383	yes
ENSG00000271225.1	ENSG00000271225.1	BNIP3P4	chr9:64810864-64811429	Ctrl	siHIF1A	OK	8.37621	13.0806	0.643059	1.7444	5e-05	0.000604383	yes
ENSG00000271334.4	ENSG00000271334.4	CTD-2078B5.2	chr5:39520430-39524708	Ctrl	siHIF1A	OK	1.75903	0.359012	-2.29268	-2.15601	5e-05	0.000604383	yes
ENSG00000271643.1	ENSG00000271643.1	RP11-10C24.3	chr3:33795687-33796950	Ctrl	siHIF1A	OK	0.580677	1.73331	1.57773	2.71397	5e-05	0.000604383	yes
ENSG00000273270.1	ENSG00000273270.1	RP11-212P7.2	chr7:128524015-128531069	Ctrl	siHIF1A	OK	0.634391	1.05653	0.735885	2.05954	5e-05	0.000604383	yes
ENSG00000273802.1	ENSG00000273802.1	HIST1H2BG	chr6:26216065-26216692	Ctrl	siHIF1A	OK	107.278	80.5692	-0.41305	-1.62718	5e-05	0.000604383	yes
ENSG00000273983.1	ENSG00000273983.1	HIST1H3G	chr6:26269404-26271815	Ctrl	siHIF1A	OK	1.61984	0.776413	-1.06096	-2.05205	5e-05	0.000604383	yes
ENSG00000274267.1	ENSG00000274267.1	HIST1H3B	chr6:26031649-26032060	Ctrl	siHIF1A	OK	75.0732	44.3824	-0.75831	-2.48587	5e-05	0.000604383	yes
ENSG00000274523.3	ENSG00000274523.3	WBSCR16	chr7:75027121-75074228	Ctrl	siHIF1A	OK	13.2187	21.5375	0.704268	2.69042	5e-05	0.000604383	yes
ENSG00000274618.1	ENSG00000274618.1	HIST1H4F	chr6:26240425-26240737	Ctrl	siHIF1A	OK	15.809	6.60185	-1.2598	-2.36127	5e-05	0.000604383	yes
ENSG00000275126.1	ENSG00000275126.1	HIST1H4L	chr6:27873198-27873510	Ctrl	siHIF1A	OK	69.411	32.2173	-1.10733	-3.20563	5e-05	0.000604383	yes
ENSG00000275379.1	ENSG00000275379.1	HIST1H3I	chr6:27871904-27872315	Ctrl	siHIF1A	OK	55.007	25.2268	-1.12466	-3.34496	5e-05	0.000604383	yes
ENSG00000275450.1	ENSG00000275450.1	RP11-4L24.3	chr9:41276279-41282846	Ctrl	siHIF1A	OK	1.30738	0.452382	-1.53107	-3.0652	5e-05	0.000604383	yes
ENSG00000275714.1	ENSG00000275714.1	HIST1H3A	chr6:26020489-26020900	Ctrl	siHIF1A	OK	29.5765	12.7365	-1.21548	-3.02114	5e-05	0.000604383	yes
ENSG00000276023.3	ENSG00000276023.3	DUSP14	chr17:37489830-37513501	Ctrl	siHIF1A	OK	20.4787	28.0567	0.45422	1.7231	5e-05	0.000604383	yes
ENSG00000276293.3	ENSG00000276293.3	PIP4K2B	chr17:38765688-38800126	Ctrl	siHIF1A	OK	15.8314	21.5572	0.445384	1.5793	5e-05	0.000604383	yes
ENSG00000276409.3	ENSG00000276409.3	CCL14	chr17:35983290-36011618	Ctrl	siHIF1A	OK	7.65056	38.4361	2.32882	4.97191	5e-05	0.000604383	yes
ENSG00000276966.1	ENSG00000276966.1	HIST1H4E	chr6:26204644-26204956	Ctrl	siHIF1A	OK	339.908	210.507	-0.691275	-2.67525	5e-05	0.000604383	yes
ENSG00000277075.1	ENSG00000277075.1	HIST1H2AE	chr6:26216974-26217367	Ctrl	siHIF1A	OK	86.3108	60.2004	-0.519767	-1.78646	5e-05	0.000604383	yes
ENSG00000277157.1	ENSG00000277157.1	HIST1H4D	chr6:26188764-26189076	Ctrl	siHIF1A	OK	69.9543	34.8815	-1.00395	-2.91682	5e-05	0.000604383	yes
ENSG00000277224.1	ENSG00000277224.1	HIST1H2BF	chr6:26199558-26199939	Ctrl	siHIF1A	OK	26.8654	14.9211	-0.848398	-2.23186	5e-05	0.000604383	yes
ENSG00000278463.1	ENSG00000278463.1	HIST1H2AB	chr6:26033175-26033568	Ctrl	siHIF1A	OK	35.9427	22.0967	-0.701867	-1.93413	5e-05	0.000604383	yes
ENSG00000278637.1	ENSG00000278637.1	HIST1H4A	chr6:26021678-26021990	Ctrl	siHIF1A	OK	24.6374	12.7825	-0.946685	-2.18011	5e-05	0.000604383	yes
ENSG00000278705.1	ENSG00000278705.1	HIST1H4B	chr6:26026814-26027252	Ctrl	siHIF1A	OK	110.955	64.4945	-0.782727	-2.87761	5e-05	0.000604383	yes
ENSG00000278828.1	ENSG00000278828.1	HIST1H3H	chr6:27810063-27811300	Ctrl	siHIF1A	OK	23.1369	16.1183	-0.521502	-1.82315	5e-05	0.000604383	yes
ENSG00000279141.2	ENSG00000279141.2	LINC01451	chr9:136612023-136617181	Ctrl	siHIF1A	OK	1.85349	0.682523	-1.44129	-2.59674	5e-05	0.000604383	yes
ENSG00000279296.1	ENSG00000279296.1	RP11-609D21.3	chr17:6755446-6776116	Ctrl	siHIF1A	OK	11.0646	42.7522	1.95004	5.73994	5e-05	0.000604383	yes
ENSG00000279442.1	ENSG00000279442.1	LA16c-60D12.2	chr22:15298377-15304556	Ctrl	siHIF1A	OK	1.6557	2.35838	0.510351	1.66509	5e-05	0.000604383	yes
ENSG00000280106.1	ENSG00000280106.1	CTC-523E23.3	chr19:34949037-34951205	Ctrl	siHIF1A	OK	5.6103	3.59792	-0.640917	-1.78005	5e-05	0.000604383	yes
ENSG00000280385.1	ENSG00000280385.1	AP000648.5	chr11:90193613-90198120	Ctrl	siHIF1A	OK	2.78854	1.72682	-0.691398	-2.10167	5e-05	0.000604383	yes
ENSG00000281376.1	ENSG00000281376.1	ABALON	chr20:31664451-31723989	Ctrl	siHIF1A	OK	17.5286	31.1837	0.831079	2.01658	5e-05	0.000604383	yes
ENSG00000007866.17	ENSG00000007866.17	TEAD3	chr6:35473596-35497076	Ctrl	siHIF1A	OK	0.574688	0.249593	-1.2032	-1.40799	0.0001	0.00113211	yes
ENSG00000012822.14	ENSG00000012822.14	CALCOCO1	chr12:53708516-53727745	Ctrl	siHIF1A	OK	27.1987	39.954	0.554798	1.639	0.0001	0.00113211	yes
ENSG00000022267.15	ENSG00000022267.15	FHL1	chrX:136146701-136211359	Ctrl	siHIF1A	OK	26.9223	35.3151	0.391481	1.44742	0.0001	0.00113211	yes
ENSG00000022567.8	ENSG00000022567.8	SLC45A4	chr8:141207165-141308305	Ctrl	siHIF1A	OK	2.72927	1.10102	-1.30967	-1.71421	0.0001	0.00113211	yes
ENSG00000023902.12	ENSG00000023902.12	PLEKHO1	chr1:150149182-150164720	Ctrl	siHIF1A	OK	77.4482	56.496	-0.455082	-1.57364	0.0001	0.00113211	yes
ENSG00000036054.11	ENSG00000036054.11	TBC1D23	chr3:100260999-100325251	Ctrl	siHIF1A	OK	12.4837	16.5537	0.407111	1.3403	0.0001	0.00113211	yes
ENSG00000048392.10	ENSG00000048392.10	RRM2B	chr8:102204501-102239118	Ctrl	siHIF1A	OK	56.8453	43.4414	-0.387971	-1.2016	0.0001	0.00113211	yes
ENSG00000065534.17	ENSG00000065534.17	MYLK	chr3:123585541-123884331	Ctrl	siHIF1A	OK	8.34268	5.01114	-0.735372	-1.38626	0.0001	0.00113211	yes
ENSG00000078596.9	ENSG00000078596.9	ITM2A	chrX:79360383-79367667	Ctrl	siHIF1A	OK	25.6183	35.0836	0.45362	1.60034	0.0001	0.00113211	yes
ENSG00000079257.6	ENSG00000079257.6	LXN	chr3:158644277-158692575	Ctrl	siHIF1A	OK	63.4723	42.0937	-0.592525	-1.5912	0.0001	0.00113211	yes
ENSG00000090273.12	ENSG00000090273.12	NUDC	chr1:26890487-26946862	Ctrl	siHIF1A	OK	23.432	31.8951	0.444851	1.59497	0.0001	0.00113211	yes
ENSG00000090520.9	ENSG00000090520.9	DNAJB11	chr3:186538440-186773476	Ctrl	siHIF1A	OK	38.278	52.4046	0.453178	1.57145	0.0001	0.00113211	yes
ENSG00000090971.4	ENSG00000090971.4	NAT14	chr19:55485003-55487568	Ctrl	siHIF1A	OK	16.1591	11.1171	-0.539565	-1.55898	0.0001	0.00113211	yes
ENSG00000100412.14	ENSG00000100412.14	ACO2	chr22:41469124-41544606	Ctrl	siHIF1A	OK	13.6185	21.3267	0.647097	1.52039	0.0001	0.00113211	yes
ENSG00000101955.13	ENSG00000101955.13	SRPX	chrX:37349274-38688920	Ctrl	siHIF1A	OK	90.0279	130.387	0.534359	1.43456	0.0001	0.00113211	yes
ENSG00000105851.9	ENSG00000105851.9	PIK3CG	chr7:106865277-106907145	Ctrl	siHIF1A	OK	3.67919	2.48394	-0.566759	-1.63964	0.0001	0.00113211	yes
ENSG00000106991.12	ENSG00000106991.12	ENG	chr9:127815011-127854756	Ctrl	siHIF1A	OK	154.369	108.224	-0.51236	-1.60211	0.0001	0.00113211	yes
ENSG00000108798.7	ENSG00000108798.7	ABI3	chr17:49202790-49223225	Ctrl	siHIF1A	OK	12.2398	16.9066	0.466008	1.54136	0.0001	0.00113211	yes
ENSG00000109654.13	ENSG00000109654.13	TRIM2	chr4:153152341-153339320	Ctrl	siHIF1A	OK	4.79527	3.21053	-0.578801	-1.1407	0.0001	0.00113211	yes
ENSG00000110628.12	ENSG00000110628.12	SLC22A18	chr11:2887779-2925246	Ctrl	siHIF1A	OK	2.22797	1.00695	-1.14574	-1.31788	0.0001	0.00113211	yes
ENSG00000112079.8	ENSG00000112079.8	STK38	chr6:36493891-36547470	Ctrl	siHIF1A	OK	9.80943	13.6436	0.475986	1.89258	0.0001	0.00113211	yes
ENSG00000113356.9	ENSG00000113356.9	POLR3G	chr5:90458202-90514553	Ctrl	siHIF1A	OK	6.47162	3.78126	-0.775259	-1.42708	0.0001	0.00113211	yes
ENSG00000115159.14	ENSG00000115159.14	GPD2	chr2:156435289-156613735	Ctrl	siHIF1A	OK	10.0053	7.46089	-0.423343	-1.34305	0.0001	0.00113211	yes
ENSG00000115170.12	ENSG00000115170.12	ACVR1	chr2:157736443-157875862	Ctrl	siHIF1A	OK	13.9175	10.0608	-0.468152	-1.47412	0.0001	0.00113211	yes
ENSG00000115594.10	ENSG00000115594.10	IL1R1	chr2:102064543-102182108	Ctrl	siHIF1A	OK	1.72881	2.56257	0.567814	1.23615	0.0001	0.00113211	yes
ENSG00000118257.15	ENSG00000118257.15	NRP2	chr2:205681989-205798133	Ctrl	siHIF1A	OK	91.4007	135.389	0.566833	1.41051	0.0001	0.00113211	yes
ENSG00000125827.7	ENSG00000125827.7	TMX4	chr20:7977347-8043512	Ctrl	siHIF1A	OK	5.83178	7.79556	0.418716	1.39574	0.0001	0.00113211	yes
ENSG00000125846.14	ENSG00000125846.14	ZNF133	chr20:18288282-18316996	Ctrl	siHIF1A	OK	3.58321	5.56011	0.633861	1.5047	0.0001	0.00113211	yes
ENSG00000126581.11	ENSG00000126581.11	BECN1	chr17:42798791-42843758	Ctrl	siHIF1A	OK	24.8451	38.0378	0.614469	1.45268	0.0001	0.00113211	yes
ENSG00000131732.10	ENSG00000131732.10	ZCCHC9	chr5:81301589-81313297	Ctrl	siHIF1A	OK	9.05395	5.92453	-0.611845	-1.54193	0.0001	0.00113211	yes
ENSG00000133816.12	ENSG00000133816.12	MICAL2	chr11:12094007-12263789	Ctrl	siHIF1A	OK	34.5536	49.0506	0.505436	1.15983	0.0001	0.00113211	yes
ENSG00000134363.10	ENSG00000134363.10	FST	chr5:53480408-53487134	Ctrl	siHIF1A	OK	0.94184	0.401657	-1.22952	-1.32991	0.0001	0.00113211	yes
ENSG00000134986.12	ENSG00000134986.12	NREP	chr5:111496032-112017309	Ctrl	siHIF1A	OK	121.806	79.6866	-0.612177	-1.55319	0.0001	0.00113211	yes
ENSG00000135913.9	ENSG00000135913.9	USP37	chr2:218419091-218568361	Ctrl	siHIF1A	OK	3.18493	4.69376	0.559483	1.19836	0.0001	0.00113211	yes
ENSG00000136169.15	ENSG00000136169.15	SETDB2	chr13:49444373-49495003	Ctrl	siHIF1A	OK	1.88367	2.91403	0.629469	1.59014	0.0001	0.00113211	yes
ENSG00000136840.17	ENSG00000136840.17	ST6GALNAC4	chr9:127907885-127917038	Ctrl	siHIF1A	OK	43.5589	30.177	-0.529516	-1.84535	0.0001	0.00113211	yes
ENSG00000137809.15	ENSG00000137809.15	ITGA11	chr15:68296532-68432162	Ctrl	siHIF1A	OK	4.56743	2.63863	-0.791593	-1.5483	0.0001	0.00113211	yes
ENSG00000138646.7	ENSG00000138646.7	HERC5	chr4:88457116-88506163	Ctrl	siHIF1A	OK	1.06537	2.12357	0.995139	1.91498	0.0001	0.00113211	yes
ENSG00000138835.21	ENSG00000138835.21	RGS3	chr9:113444730-113597743	Ctrl	siHIF1A	OK	230.446	170.904	-0.431243	-1.53834	0.0001	0.00113211	yes
ENSG00000142494.12	ENSG00000142494.12	SLC47A1	chr17:19495384-19597922	Ctrl	siHIF1A	OK	4.42319	2.60486	-0.763882	-1.73951	0.0001	0.00113211	yes
ENSG00000142871.14	ENSG00000142871.14	CYR61	chr1:85580760-85583962	Ctrl	siHIF1A	OK	88.3697	118.286	0.420655	1.51482	0.0001	0.00113211	yes
ENSG00000142910.14	ENSG00000142910.14	TINAGL1	chr1:31576484-31587686	Ctrl	siHIF1A	OK	179.131	239.574	0.419454	1.47867	0.0001	0.00113211	yes
ENSG00000146918.18	ENSG00000146918.18	NCAPG2	chr7:158631310-158704829	Ctrl	siHIF1A	OK	4.69547	2.92764	-0.681531	-1.7309	0.0001	0.00113211	yes
ENSG00000147852.14	ENSG00000147852.14	VLDLR	chr9:2422701-2660053	Ctrl	siHIF1A	OK	3.52508	2.2328	-0.658804	-1.55624	0.0001	0.00113211	yes
ENSG00000148468.15	ENSG00000148468.15	FAM171A1	chr10:15211642-15371062	Ctrl	siHIF1A	OK	11.8655	15.7913	0.412354	1.47697	0.0001	0.00113211	yes
ENSG00000150687.10	ENSG00000150687.10	PRSS23	chr11:86791058-86955391	Ctrl	siHIF1A	OK	200.593	382.97	0.932961	1.62361	0.0001	0.00113211	yes
ENSG00000152804.9	ENSG00000152804.9	HHEX	chr10:92689950-92695646	Ctrl	siHIF1A	OK	72.1199	54.9877	-0.391289	-1.54673	0.0001	0.00113211	yes
ENSG00000155380.10	ENSG00000155380.10	SLC16A1	chr1:112911846-112999496	Ctrl	siHIF1A	OK	50.3162	37.7677	-0.413868	-1.44312	0.0001	0.00113211	yes
ENSG00000158545.14	ENSG00000158545.14	ZC3H18	chr16:88570380-88631966	Ctrl	siHIF1A	OK	6.80141	9.88278	0.539082	1.4554	0.0001	0.00113211	yes
ENSG00000160180.15	ENSG00000160180.15	TFF3	chr21:42311666-42315651	Ctrl	siHIF1A	OK	0.331028	1.24676	1.91316	1.25281	0.0001	0.00113211	yes
ENSG00000160211.14	ENSG00000160211.14	G6PD	chrX:154531390-154565046	Ctrl	siHIF1A	OK	60.4063	43.4012	-0.476964	-1.50919	0.0001	0.00113211	yes
ENSG00000160551.8	ENSG00000160551.8	TAOK1	chr17:29352068-29551904	Ctrl	siHIF1A	OK	18.8128	14.0648	-0.419622	-0.991268	0.0001	0.00113211	yes
ENSG00000163577.6	ENSG00000163577.6	EIF5A2	chr3:170888414-170908693	Ctrl	siHIF1A	OK	5.72286	2.86258	-0.999418	-1.65396	0.0001	0.00113211	yes
ENSG00000165097.12	ENSG00000165097.12	KDM1B	chr6:18155328-18223853	Ctrl	siHIF1A	OK	4.79309	3.37108	-0.507747	-1.56739	0.0001	0.00113211	yes
ENSG00000165240.16	ENSG00000165240.16	ATP7A	chrX:77910655-78050395	Ctrl	siHIF1A	OK	6.40004	4.83749	-0.403822	-1.59549	0.0001	0.00113211	yes
ENSG00000166483.9	ENSG00000166483.9	WEE1	chr11:9573680-9593457	Ctrl	siHIF1A	OK	14.2943	10.2675	-0.477353	-1.59858	0.0001	0.00113211	yes
ENSG00000168209.4	ENSG00000168209.4	DDIT4	chr10:72273919-72276036	Ctrl	siHIF1A	OK	113.113	71.9899	-0.6519	-1.59492	0.0001	0.00113211	yes
ENSG00000168394.10	ENSG00000168394.10	TAP1	chr6:32840716-32859585	Ctrl	siHIF1A	OK	27.9773	40.4641	0.532382	1.68954	0.0001	0.00113211	yes
ENSG00000168487.16	ENSG00000168487.16	BMP1	chr8:22164735-22212326	Ctrl	siHIF1A	OK	21.6234	29.4016	0.443305	1.63103	0.0001	0.00113211	yes
ENSG00000170802.14	ENSG00000170802.14	FOXN2	chr2:48314636-48379294	Ctrl	siHIF1A	OK	11.1381	7.63545	-0.54472	-1.56213	0.0001	0.00113211	yes
ENSG00000171476.20	ENSG00000171476.20	HOPX	chr4:56647987-56681899	Ctrl	siHIF1A	OK	3.6097	5.60779	0.635552	1.54255	0.0001	0.00113211	yes
ENSG00000171863.11	ENSG00000171863.11	RPS7	chr2:3575204-3580919	Ctrl	siHIF1A	OK	940.441	709.994	-0.40553	-1.54206	0.0001	0.00113211	yes
ENSG00000172349.15	ENSG00000172349.15	IL16	chr15:81159574-81324183	Ctrl	siHIF1A	OK	0.623995	0.159754	-1.96569	-0.956288	0.0001	0.00113211	yes
ENSG00000173281.4	ENSG00000173281.4	PPP1R3B	chr8:9136254-9151574	Ctrl	siHIF1A	OK	14.5362	18.8172	0.372397	1.50562	0.0001	0.00113211	yes
ENSG00000173868.10	ENSG00000173868.10	PHOSPHO1	chr17:49223361-49230766	Ctrl	siHIF1A	OK	1.33187	2.39181	0.844647	1.42912	0.0001	0.00113211	yes
ENSG00000173905.7	ENSG00000173905.7	GOLIM4	chr3:168008676-168095975	Ctrl	siHIF1A	OK	15.0598	11.5108	-0.38772	-1.51137	0.0001	0.00113211	yes
ENSG00000174405.12	ENSG00000174405.12	LIG4	chr13:108207438-108218368	Ctrl	siHIF1A	OK	8.11118	6.09982	-0.411144	-1.55893	0.0001	0.00113211	yes
ENSG00000177106.13	ENSG00000177106.13	EPS8L2	chr11:644232-727727	Ctrl	siHIF1A	OK	1.47448	3.47915	1.23853	0.887812	0.0001	0.00113211	yes
ENSG00000177692.10	ENSG00000177692.10	DNAJC28	chr21:33485529-33491720	Ctrl	siHIF1A	OK	0.625797	1.18498	0.921093	1.69248	0.0001	0.00113211	yes
ENSG00000178234.11	ENSG00000178234.11	GALNT11	chr7:152025673-152122347	Ctrl	siHIF1A	OK	13.5908	20.079	0.56306	1.63274	0.0001	0.00113211	yes
ENSG00000178904.17	ENSG00000178904.17	DPY19L3	chr19:32390049-32485895	Ctrl	siHIF1A	OK	9.78622	6.63239	-0.561222	-1.44583	0.0001	0.00113211	yes
ENSG00000179361.16	ENSG00000179361.16	ARID3B	chr15:74541176-74598131	Ctrl	siHIF1A	OK	2.14733	1.15884	-0.889867	-1.47784	0.0001	0.00113211	yes
ENSG00000181029.8	ENSG00000181029.8	TRAPPC5	chr19:7676627-7687703	Ctrl	siHIF1A	OK	56.1418	80.1903	0.514351	1.68486	0.0001	0.00113211	yes
ENSG00000181218.5	ENSG00000181218.5	HIST3H2A	chr1:228456978-228457873	Ctrl	siHIF1A	OK	5.5593	8.60432	0.630158	1.697	0.0001	0.00113211	yes
ENSG00000182199.9	ENSG00000182199.9	SHMT2	chr12:57229326-57240715	Ctrl	siHIF1A	OK	51.5908	38.6522	-0.416564	-1.53388	0.0001	0.00113211	yes
ENSG00000182489.8	ENSG00000182489.8	XKRX	chrX:100913444-100929433	Ctrl	siHIF1A	OK	1.31875	0.725481	-0.862167	-1.91608	0.0001	0.00113211	yes
ENSG00000183323.11	ENSG00000183323.11	CCDC125	chr5:69280174-69332809	Ctrl	siHIF1A	OK	2.20226	3.18567	0.532611	1.46482	0.0001	0.00113211	yes
ENSG00000183496.5	ENSG00000183496.5	MEX3B	chr15:82041777-82046141	Ctrl	siHIF1A	OK	13.8379	10.4879	-0.399903	-1.53695	0.0001	0.00113211	yes
ENSG00000184481.15	ENSG00000184481.15	FOXO4	chrX:71096196-71103535	Ctrl	siHIF1A	OK	2.48419	3.93605	0.663975	1.56035	0.0001	0.00113211	yes
ENSG00000186318.15	ENSG00000186318.15	BACE1	chr11:117232624-117413268	Ctrl	siHIF1A	OK	8.68338	13.5905	0.64627	1.23859	0.0001	0.00113211	yes
ENSG00000187866.7	ENSG00000187866.7	FAM122A	chr9:68705413-69009176	Ctrl	siHIF1A	OK	3.17099	4.37864	0.46555	1.58046	0.0001	0.00113211	yes
ENSG00000188846.12	ENSG00000188846.12	RPL14	chr3:40457291-40468587	Ctrl	siHIF1A	OK	576.517	438.69	-0.394162	-1.4829	0.0001	0.00113211	yes
ENSG00000198774.4	ENSG00000198774.4	RASSF9	chr12:85800696-85836570	Ctrl	siHIF1A	OK	1.7235	1.16979	-0.559087	-1.6515	0.0001	0.00113211	yes
ENSG00000215183.4	ENSG00000215183.4	MSMP	chr9:35749286-35758575	Ctrl	siHIF1A	OK	18.4926	5.82049	-1.66773	-2.0099	0.0001	0.00113211	yes
ENSG00000221869.4	ENSG00000221869.4	CEBPD	chr8:47736908-47739086	Ctrl	siHIF1A	OK	4.63181	6.51811	0.492875	1.46609	0.0001	0.00113211	yes
ENSG00000221963.5	ENSG00000221963.5	APOL6	chr22:35648394-35668409	Ctrl	siHIF1A	OK	2.12537	2.86866	0.43266	1.58056	0.0001	0.00113211	yes
ENSG00000224914.2	ENSG00000224914.2	LINC00863	chr10:87342735-87370695	Ctrl	siHIF1A	OK	2.06618	3.0251	0.550013	1.56086	0.0001	0.00113211	yes
ENSG00000229474.5	ENSG00000229474.5	PATL2	chr15:44665731-44711316	Ctrl	siHIF1A	OK	0.123074	0.531764	2.11126	0.885535	0.0001	0.00113211	yes
ENSG00000240771.5	ENSG00000240771.5	ARHGEF25	chr12:57610179-57633355	Ctrl	siHIF1A	OK	3.08663	1.78483	-0.790245	-1.38867	0.0001	0.00113211	yes
ENSG00000254772.8	ENSG00000254772.8	EEF1G	chr11:62559600-62592177	Ctrl	siHIF1A	OK	1028.7	738.02	-0.479094	-1.56369	0.0001	0.00113211	yes
ENSG00000255874.2	ENSG00000255874.2	LINC00346	chr13:110863986-110870251	Ctrl	siHIF1A	OK	0.646556	0.967766	0.581883	1.64514	0.0001	0.00113211	yes
ENSG00000261438.1	ENSG00000261438.1	RP11-399O19.9	chr10:89015835-89017059	Ctrl	siHIF1A	OK	0.323857	0.886425	1.45264	1.8633	0.0001	0.00113211	yes
ENSG00000261455.1	ENSG00000261455.1	LINC01003	chr7:152463785-152465549	Ctrl	siHIF1A	OK	1.35243	2.44262	0.852873	1.74151	0.0001	0.00113211	yes
ENSG00000271020.1	ENSG00000271020.1	RP11-10C24.1	chr3:33797148-33797681	Ctrl	siHIF1A	OK	0.982739	2.3187	1.23844	1.73731	0.0001	0.00113211	yes
ENSG00000274997.1	ENSG00000274997.1	HIST1H2AH	chr6:27147128-27147516	Ctrl	siHIF1A	OK	26.4728	17.2728	-0.616008	-1.57376	0.0001	0.00113211	yes
ENSG00000018610.12	ENSG00000018610.12	CXorf56	chrX:119538148-119565408	Ctrl	siHIF1A	OK	6.57144	9.48706	0.529753	1.56059	0.00015	0.00161003	yes
ENSG00000025770.17	ENSG00000025770.17	NCAPH2	chr22:50508215-50523472	Ctrl	siHIF1A	OK	6.92506	9.67163	0.481931	1.45393	0.00015	0.00161003	yes
ENSG00000025800.12	ENSG00000025800.12	KPNA6	chr1:32108037-32176568	Ctrl	siHIF1A	OK	15.9718	20.7574	0.3781	1.51008	0.00015	0.00161003	yes
ENSG00000031698.11	ENSG00000031698.11	SARS	chr1:109213917-109238169	Ctrl	siHIF1A	OK	48.7569	64.4521	0.402621	1.58565	0.00015	0.00161003	yes
ENSG00000046647.12	ENSG00000046647.12	GEMIN8	chrX:14008278-14029893	Ctrl	siHIF1A	OK	12.699	8.9946	-0.497582	-1.52512	0.00015	0.00161003	yes
ENSG00000056291.16	ENSG00000056291.16	NPFFR2	chr4:72031803-72148067	Ctrl	siHIF1A	OK	0.490662	0.112621	-2.12325	-1.45493	0.00015	0.00161003	yes
ENSG00000061676.13	ENSG00000061676.13	NCKAP1	chr2:182909114-183038858	Ctrl	siHIF1A	OK	75.6856	55.4071	-0.449948	-1.12987	0.00015	0.00161003	yes
ENSG00000063245.13	ENSG00000063245.13	EPN1	chr19:55675225-55738402	Ctrl	siHIF1A	OK	17.979	27.5022	0.613229	1.65579	0.00015	0.00161003	yes
ENSG00000068001.12	ENSG00000068001.12	HYAL2	chr3:50317789-50328251	Ctrl	siHIF1A	OK	299.966	415.14	0.468801	1.66936	0.00015	0.00161003	yes
ENSG00000073584.17	ENSG00000073584.17	SMARCE1	chr17:40624961-40665181	Ctrl	siHIF1A	OK	31.2311	43.678	0.483921	1.46227	0.00015	0.00161003	yes
ENSG00000075218.17	ENSG00000075218.17	GTSE1	chr22:46296740-46330810	Ctrl	siHIF1A	OK	2.89692	1.75887	-0.719868	-1.64943	0.00015	0.00161003	yes
ENSG00000075711.19	ENSG00000075711.19	DLG1	chr3:197042559-197303747	Ctrl	siHIF1A	OK	42.1835	64.7854	0.61899	1.39429	0.00015	0.00161003	yes
ENSG00000076248.9	ENSG00000076248.9	UNG	chr12:109097573-109110992	Ctrl	siHIF1A	OK	11.1254	14.7976	0.411509	1.51322	0.00015	0.00161003	yes
ENSG00000080298.14	ENSG00000080298.14	RFX3	chr9:3218296-3526004	Ctrl	siHIF1A	OK	4.42485	2.90509	-0.607046	-1.29184	0.00015	0.00161003	yes
ENSG00000080986.11	ENSG00000080986.11	NDC80	chr18:2571510-2616635	Ctrl	siHIF1A	OK	3.66534	2.357	-0.636994	-1.43554	0.00015	0.00161003	yes
ENSG00000083720.11	ENSG00000083720.11	OXCT1	chr5:41730064-41872241	Ctrl	siHIF1A	OK	14.7128	10.1103	-0.54125	-1.34521	0.00015	0.00161003	yes
ENSG00000089351.13	ENSG00000089351.13	GRAMD1A	chr19:34994783-35026471	Ctrl	siHIF1A	OK	67.1012	49.3664	-0.442809	-1.41803	0.00015	0.00161003	yes
ENSG00000100147.12	ENSG00000100147.12	CCDC134	chr22:41800678-41826299	Ctrl	siHIF1A	OK	2.46454	1.49334	-0.722772	-1.53309	0.00015	0.00161003	yes
ENSG00000101052.11	ENSG00000101052.11	IFT52	chr20:43590930-43647296	Ctrl	siHIF1A	OK	6.11654	9.45971	0.629081	1.32694	0.00015	0.00161003	yes
ENSG00000101057.14	ENSG00000101057.14	MYBL2	chr20:43667018-43716496	Ctrl	siHIF1A	OK	3.38273	2.43506	-0.474234	-1.50309	0.00015	0.00161003	yes
ENSG00000101126.14	ENSG00000101126.14	ADNP	chr20:50888918-50958555	Ctrl	siHIF1A	OK	13.4574	9.31358	-0.530988	-1.57545	0.00015	0.00161003	yes
ENSG00000103653.15	ENSG00000103653.15	CSK	chr15:74782056-74803198	Ctrl	siHIF1A	OK	15.0867	21.9662	0.542014	1.63706	0.00015	0.00161003	yes
ENSG00000105401.5	ENSG00000105401.5	CDC37	chr19:10391133-10469631	Ctrl	siHIF1A	OK	112.175	148.149	0.401299	1.54838	0.00015	0.00161003	yes
ENSG00000111696.10	ENSG00000111696.10	NT5DC3	chr12:103770452-103841197	Ctrl	siHIF1A	OK	1.48521	2.70852	0.866836	1.47708	0.00015	0.00161003	yes
ENSG00000115380.17	ENSG00000115380.17	EFEMP1	chr2:55865966-55924139	Ctrl	siHIF1A	OK	906.045	1383.59	0.610763	1.42378	0.00015	0.00161003	yes
ENSG00000117118.8	ENSG00000117118.8	SDHB	chr1:17018721-17054170	Ctrl	siHIF1A	OK	33.4454	43.2499	0.370887	1.45456	0.00015	0.00161003	yes
ENSG00000119771.13	ENSG00000119771.13	KLHL29	chr2:23385216-23708611	Ctrl	siHIF1A	OK	4.39129	3.1987	-0.457159	-1.51614	0.00015	0.00161003	yes
ENSG00000123728.8	ENSG00000123728.8	RAP2C	chrX:132203023-132489968	Ctrl	siHIF1A	OK	12.2236	16.3439	0.419088	1.46437	0.00015	0.00161003	yes
ENSG00000126878.11	ENSG00000126878.11	AIF1L	chr9:131096475-131123152	Ctrl	siHIF1A	OK	11.1978	8.63131	-0.375568	-1.38705	0.00015	0.00161003	yes
ENSG00000129128.11	ENSG00000129128.11	SPCS3	chr4:176308267-176332245	Ctrl	siHIF1A	OK	57.911	44.6371	-0.375595	-1.31419	0.00015	0.00161003	yes
ENSG00000135070.12	ENSG00000135070.12	ISCA1	chr9:86264545-86282538	Ctrl	siHIF1A	OK	11.684	15.9032	0.444787	1.59532	0.00015	0.00161003	yes
ENSG00000136490.7	ENSG00000136490.7	LIMD2	chr17:63622414-63702670	Ctrl	siHIF1A	OK	41.9935	21.8912	-0.939819	-1.48335	0.00015	0.00161003	yes
ENSG00000140945.14	ENSG00000140945.14	CDH13	chr16:82626802-83807834	Ctrl	siHIF1A	OK	64.3897	95.7986	0.573174	1.52675	0.00015	0.00161003	yes
ENSG00000141696.11	ENSG00000141696.11	P3H4	chr17:41801946-41812604	Ctrl	siHIF1A	OK	26.9796	18.2353	-0.565137	-1.50967	0.00015	0.00161003	yes
ENSG00000142937.10	ENSG00000142937.10	RPS8	chr1:44739817-44778779	Ctrl	siHIF1A	OK	1200.97	880.409	-0.447955	-1.54617	0.00015	0.00161003	yes
ENSG00000143374.13	ENSG00000143374.13	TARS2	chr1:150487363-150507609	Ctrl	siHIF1A	OK	4.70982	7.32162	0.63649	1.45091	0.00015	0.00161003	yes
ENSG00000143753.11	ENSG00000143753.11	DEGS1	chr1:224175755-224193441	Ctrl	siHIF1A	OK	63.7775	48.3662	-0.39905	-1.40768	0.00015	0.00161003	yes
ENSG00000145425.8	ENSG00000145425.8	RPS3A	chr4:151099572-151325632	Ctrl	siHIF1A	OK	664.29	466.991	-0.508416	-1.58121	0.00015	0.00161003	yes
ENSG00000145623.11	ENSG00000145623.11	OSMR	chr5:38845857-39074408	Ctrl	siHIF1A	OK	11.4573	6.37281	-0.846263	-1.50675	0.00015	0.00161003	yes
ENSG00000150995.16	ENSG00000150995.16	ITPR1	chr3:4493347-4887293	Ctrl	siHIF1A	OK	7.90751	4.47844	-0.820225	-1.23319	0.00015	0.00161003	yes
ENSG00000151150.19	ENSG00000151150.19	ANK3	chr10:60026297-60733490	Ctrl	siHIF1A	OK	5.09753	3.08288	-0.725519	-1.20842	0.00015	0.00161003	yes
ENSG00000151458.10	ENSG00000151458.10	ANKRD50	chr4:124664051-124712732	Ctrl	siHIF1A	OK	24.7276	19.0649	-0.375204	-1.55344	0.00015	0.00161003	yes
ENSG00000152484.12	ENSG00000152484.12	USP12	chr13:27066141-27171896	Ctrl	siHIF1A	OK	13.9483	9.32938	-0.580237	-1.31471	0.00015	0.00161003	yes
ENSG00000156804.6	ENSG00000156804.6	FBXO32	chr8:123497888-123541206	Ctrl	siHIF1A	OK	4.52002	7.5162	0.733676	1.65925	0.00015	0.00161003	yes
ENSG00000159314.10	ENSG00000159314.10	ARHGAP27	chr17:45393901-45434421	Ctrl	siHIF1A	OK	13.5518	20.3126	0.58389	1.3398	0.00015	0.00161003	yes
ENSG00000161800.11	ENSG00000161800.11	RACGAP1	chr12:49967193-50033136	Ctrl	siHIF1A	OK	6.34768	4.03487	-0.653706	-1.4493	0.00015	0.00161003	yes
ENSG00000161904.10	ENSG00000161904.10	LEMD2	chr6:33771201-33789136	Ctrl	siHIF1A	OK	41.6982	31.2808	-0.414707	-1.36147	0.00015	0.00161003	yes
ENSG00000162616.8	ENSG00000162616.8	DNAJB4	chr1:77979174-78138449	Ctrl	siHIF1A	OK	78.0684	104.382	0.419068	1.45692	0.00015	0.00161003	yes
ENSG00000162909.16	ENSG00000162909.16	CAPN2	chr1:223701592-223776018	Ctrl	siHIF1A	OK	130.252	170.421	0.387803	1.23607	0.00015	0.00161003	yes
ENSG00000163932.12	ENSG00000163932.12	PRKCD	chr3:53156008-53192717	Ctrl	siHIF1A	OK	4.39538	3.12603	-0.491654	-1.50707	0.00015	0.00161003	yes
ENSG00000164039.13	ENSG00000164039.13	BDH2	chr4:103019867-103099883	Ctrl	siHIF1A	OK	18.8948	27.1876	0.524957	1.63002	0.00015	0.00161003	yes
ENSG00000166444.16	ENSG00000166444.16	ST5	chr11:8682410-8910951	Ctrl	siHIF1A	OK	4.14652	1.82932	-1.18059	-0.265437	0.00015	0.00161003	yes
ENSG00000168175.13	ENSG00000168175.13	MAPK1IP1L	chr14:55051630-55070192	Ctrl	siHIF1A	OK	27.5202	19.0903	-0.527652	-1.46841	0.00015	0.00161003	yes
ENSG00000168297.14	ENSG00000168297.14	PXK	chr3:58332879-58426126	Ctrl	siHIF1A	OK	9.86298	13.3195	0.433439	1.50294	0.00015	0.00161003	yes
ENSG00000169032.8	ENSG00000169032.8	MAP2K1	chr15:66386816-66497813	Ctrl	siHIF1A	OK	33.6384	23.9511	-0.490017	-1.51578	0.00015	0.00161003	yes
ENSG00000170542.5	ENSG00000170542.5	SERPINB9	chr6:2887265-2903280	Ctrl	siHIF1A	OK	18.0138	13.6591	-0.399238	-1.61271	0.00015	0.00161003	yes
ENSG00000171435.12	ENSG00000171435.12	KSR2	chr12:117453011-117968983	Ctrl	siHIF1A	OK	0.241232	0.602629	1.32085	1.35358	0.00015	0.00161003	yes
ENSG00000173020.9	ENSG00000173020.9	ADRBK1	chr11:67266409-67286556	Ctrl	siHIF1A	OK	17.6241	23.1756	0.395058	1.25344	0.00015	0.00161003	yes
ENSG00000173950.14	ENSG00000173950.14	XXYLT1	chr3:195068278-195271167	Ctrl	siHIF1A	OK	39.0856	28.6271	-0.449252	-1.44366	0.00015	0.00161003	yes
ENSG00000176225.11	ENSG00000176225.11	RTTN	chr18:70003792-70205945	Ctrl	siHIF1A	OK	3.42565	1.81173	-0.919008	-1.38763	0.00015	0.00161003	yes
ENSG00000176788.8	ENSG00000176788.8	BASP1	chr5:17065597-17276843	Ctrl	siHIF1A	OK	54.9356	42.8204	-0.359444	-1.4711	0.00015	0.00161003	yes
ENSG00000177679.15	ENSG00000177679.15	SRRM3	chr7:76201899-76287288	Ctrl	siHIF1A	OK	1.52948	0.871378	-0.811669	-1.60432	0.00015	0.00161003	yes
ENSG00000178878.11	ENSG00000178878.11	APOLD1	chr12:12725916-12829981	Ctrl	siHIF1A	OK	5.29715	2.75973	-0.940688	-1.47051	0.00015	0.00161003	yes
ENSG00000180353.9	ENSG00000180353.9	HCLS1	chr3:121631398-121660927	Ctrl	siHIF1A	OK	21.2714	27.873	0.389952	1.43894	0.00015	0.00161003	yes
ENSG00000182545.6	ENSG00000182545.6	RNASE10	chr14:20505536-20511169	Ctrl	siHIF1A	OK	1.64769	0.871051	-0.919613	-1.64118	0.00015	0.00161003	yes
ENSG00000185896.10	ENSG00000185896.10	LAMP1	chr13:113297240-113323672	Ctrl	siHIF1A	OK	216.524	284.287	0.392819	1.47774	0.00015	0.00161003	yes
ENSG00000188266.12	ENSG00000188266.12	HYKK	chr15:78507563-78537372	Ctrl	siHIF1A	OK	0.525135	1.27098	1.27518	1.47776	0.00015	0.00161003	yes
ENSG00000189212.11	ENSG00000189212.11	DPY19L2P1	chr7:35079988-35186041	Ctrl	siHIF1A	OK	0.618433	0.338173	-0.870854	-1.6375	0.00015	0.00161003	yes
ENSG00000196305.16	ENSG00000196305.16	IARS	chr9:92210206-92293756	Ctrl	siHIF1A	OK	38.5072	27.1597	-0.503663	-1.26654	0.00015	0.00161003	yes
ENSG00000198832.9	ENSG00000198832.9	SELM	chr22:31104771-31120069	Ctrl	siHIF1A	OK	58.5105	42.8361	-0.449869	-1.61527	0.00015	0.00161003	yes
ENSG00000204219.8	ENSG00000204219.8	TCEA3	chr1:23381060-23424740	Ctrl	siHIF1A	OK	0.422014	1.0118	1.26156	1.31659	0.00015	0.00161003	yes
ENSG00000204315.3	ENSG00000204315.3	FKBPL	chr6:32128706-32130291	Ctrl	siHIF1A	OK	2.46267	3.74443	0.604527	1.5573	0.00015	0.00161003	yes
ENSG00000205111.7	ENSG00000205111.7	CDKL4	chr2:39175645-39229588	Ctrl	siHIF1A	OK	0.744989	0.174504	-2.09396	-1.14576	0.00015	0.00161003	yes
ENSG00000215481.7	ENSG00000215481.7	BCRP3	chr22:24632914-24653356	Ctrl	siHIF1A	OK	1.33132	2.78153	1.06302	1.57255	0.00015	0.00161003	yes
ENSG00000221886.3	ENSG00000221886.3	ZBED8	chr5:160393147-160400097	Ctrl	siHIF1A	OK	1.39111	2.10901	0.600323	1.59309	0.00015	0.00161003	yes
ENSG00000233621.1	ENSG00000233621.1	LINC01137	chr1:37454878-37474411	Ctrl	siHIF1A	OK	1.92869	1.16573	-0.726383	-1.53482	0.00015	0.00161003	yes
ENSG00000235387.1	ENSG00000235387.1	LINC00961	chr9:35909482-35911686	Ctrl	siHIF1A	OK	3.11647	1.98396	-0.651531	-1.64764	0.00015	0.00161003	yes
ENSG00000263528.6	ENSG00000263528.6	IKBKE	chr1:206470475-206497728	Ctrl	siHIF1A	OK	6.11541	4.00558	-0.61044	-1.55265	0.00015	0.00161003	yes
ENSG00000266208.1	ENSG00000266208.1	CTD-2267D19.3	chr17:40360654-40364693	Ctrl	siHIF1A	OK	0.863735	1.55719	0.850286	1.61556	0.00015	0.00161003	yes
ENSG00000271503.4	ENSG00000271503.4	CCL5	chr17:35868966-35885863	Ctrl	siHIF1A	OK	0.568049	1.26902	1.15963	1.65886	0.00015	0.00161003	yes
ENSG00000273038.2	ENSG00000273038.2	RP11-479G22.8	chr10:32887254-32889311	Ctrl	siHIF1A	OK	2.1525	1.38435	-0.636798	-1.58273	0.00015	0.00161003	yes
ENSG00000277511.1	ENSG00000277511.1	CTD-2095E4.5	chr17:32127594-32128454	Ctrl	siHIF1A	OK	0.918169	2.11229	1.20198	1.71774	0.00015	0.00161003	yes
ENSG00000070814.16	ENSG00000070814.16	TCOF1	chr5:150357638-150400308	Ctrl	siHIF1A	OK	5.14003	6.87499	0.419581	1.29934	0.0002	0.00207831	yes
ENSG00000072786.11	ENSG00000072786.11	STK10	chr5:172042072-172188386	Ctrl	siHIF1A	OK	21.6066	15.8333	-0.448506	-1.06162	0.0002	0.00207831	yes
ENSG00000073169.12	ENSG00000073169.12	SELO	chr22:50200978-50217616	Ctrl	siHIF1A	OK	14.387	10.687	-0.428904	-1.47535	0.0002	0.00207831	yes
ENSG00000074071.12	ENSG00000074071.12	MRPS34	chr16:1771889-1773155	Ctrl	siHIF1A	OK	28.7103	38.3529	0.417768	1.54641	0.0002	0.00207831	yes
ENSG00000074590.12	ENSG00000074590.12	NUAK1	chr12:106063339-106140033	Ctrl	siHIF1A	OK	17.1705	24.4356	0.509052	1.398	0.0002	0.00207831	yes
ENSG00000091436.15	ENSG00000091436.15	pk	chr2:173075434-173282036	Ctrl	siHIF1A	OK	6.40747	4.25222	-0.591539	-1.69899	0.0002	0.00207831	yes
ENSG00000100258.16	ENSG00000100258.16	LMF2	chr22:50502948-50507691	Ctrl	siHIF1A	OK	24.065	33.85	0.492219	1.6504	0.0002	0.00207831	yes
ENSG00000100526.18	ENSG00000100526.18	CDKN3	chr14:54396848-54420218	Ctrl	siHIF1A	OK	6.69043	4.19785	-0.672451	-1.46643	0.0002	0.00207831	yes
ENSG00000102158.18	ENSG00000102158.18	MAGT1	chrX:77826363-77895593	Ctrl	siHIF1A	OK	33.8733	43.5552	0.362694	1.45918	0.0002	0.00207831	yes
ENSG00000107372.11	ENSG00000107372.11	ZFAND5	chr9:72351424-72365235	Ctrl	siHIF1A	OK	92.7182	69.3698	-0.418544	-1.4485	0.0002	0.00207831	yes
ENSG00000109062.8	ENSG00000109062.8	SLC9A3R1	chr17:74670577-74769353	Ctrl	siHIF1A	OK	7.49819	5.34332	-0.488807	-1.51403	0.0002	0.00207831	yes
ENSG00000110400.9	ENSG00000110400.9	PVRL1	chr11:119608422-119729084	Ctrl	siHIF1A	OK	4.21925	2.54661	-0.728412	-1.54942	0.0002	0.00207831	yes
ENSG00000112769.17	ENSG00000112769.17	LAMA4	chr6:112108759-112351296	Ctrl	siHIF1A	OK	208.058	325.831	0.647139	1.0505	0.0002	0.00207831	yes
ENSG00000113552.14	ENSG00000113552.14	GNPDA1	chr5:141991748-142013041	Ctrl	siHIF1A	OK	30.5853	40.3452	0.39956	1.42398	0.0002	0.00207831	yes
ENSG00000115295.18	ENSG00000115295.18	CLIP4	chr2:29097704-29189643	Ctrl	siHIF1A	OK	24.6836	17.7336	-0.477069	-1.38333	0.0002	0.00207831	yes
ENSG00000119471.13	ENSG00000119471.13	HSDL2	chr9:112379936-112669397	Ctrl	siHIF1A	OK	6.42975	10.2631	0.674631	1.71875	0.0002	0.00207831	yes
ENSG00000131748.14	ENSG00000131748.14	STARD3	chr17:39637064-39663484	Ctrl	siHIF1A	OK	33.369	24.4348	-0.449573	-1.38373	0.0002	0.00207831	yes
ENSG00000136802.10	ENSG00000136802.10	LRRC8A	chr9:128832941-128918039	Ctrl	siHIF1A	OK	38.0254	49.6673	0.385335	1.32581	0.0002	0.00207831	yes
ENSG00000138449.9	ENSG00000138449.9	SLC40A1	chr2:189560578-189583758	Ctrl	siHIF1A	OK	11.478	15.4111	0.425102	1.46337	0.0002	0.00207831	yes
ENSG00000138722.8	ENSG00000138722.8	MMRN1	chr4:89879531-89954629	Ctrl	siHIF1A	OK	303.988	430.057	0.500514	1.39068	0.0002	0.00207831	yes
ENSG00000139433.8	ENSG00000139433.8	GLTP	chr12:109850942-109880488	Ctrl	siHIF1A	OK	20.2919	26.5906	0.390015	1.53168	0.0002	0.00207831	yes
ENSG00000145982.10	ENSG00000145982.10	FARS2	chr6:5261043-5771580	Ctrl	siHIF1A	OK	6.60113	9.17774	0.475427	1.43687	0.0002	0.00207831	yes
ENSG00000151176.6	ENSG00000151176.6	PLBD2	chr12:113298758-113391625	Ctrl	siHIF1A	OK	13.7998	8.15369	-0.75912	-1.57177	0.0002	0.00207831	yes
ENSG00000154258.15	ENSG00000154258.15	ABCA9	chr17:68867291-69061064	Ctrl	siHIF1A	OK	4.84484	8.27852	0.772925	1.23028	0.0002	0.00207831	yes
ENSG00000155465.17	ENSG00000155465.17	SLC7A7	chr14:22773221-22829820	Ctrl	siHIF1A	OK	12.6752	9.27201	-0.451053	-1.39744	0.0002	0.00207831	yes
ENSG00000157514.15	ENSG00000157514.15	TSC22D3	chrX:107713220-107777342	Ctrl	siHIF1A	OK	14.0987	19.5874	0.474366	1.57016	0.0002	0.00207831	yes
ENSG00000157873.16	ENSG00000157873.16	TNFRSF14	chr1:2549919-2565382	Ctrl	siHIF1A	OK	75.6687	57.0257	-0.408082	-1.43853	0.0002	0.00207831	yes
ENSG00000158164.6	ENSG00000158164.6	TMSB15A	chrX:102513675-102516784	Ctrl	siHIF1A	OK	1.51998	0.19095	-2.99279	-2.40729	0.0002	0.00207831	yes
ENSG00000162236.10	ENSG00000162236.10	STX5	chr11:62806896-62832088	Ctrl	siHIF1A	OK	14.8675	19.9632	0.425177	1.54813	0.0002	0.00207831	yes
ENSG00000162600.10	ENSG00000162600.10	OMA1	chr1:56929209-58546802	Ctrl	siHIF1A	OK	6.681	10.3547	0.632153	1.5685	0.0002	0.00207831	yes
ENSG00000162636.14	ENSG00000162636.14	FAM102B	chr1:108560088-108644900	Ctrl	siHIF1A	OK	2.77614	2.00857	-0.466915	-1.53096	0.0002	0.00207831	yes
ENSG00000164983.7	ENSG00000164983.7	TMEM65	chr8:124306188-124372692	Ctrl	siHIF1A	OK	9.72889	7.44572	-0.385864	-1.56057	0.0002	0.00207831	yes
ENSG00000165821.10	ENSG00000165821.10	SALL2	chr14:21521080-21537216	Ctrl	siHIF1A	OK	0.533274	0.198918	-1.4227	-1.15514	0.0002	0.00207831	yes
ENSG00000166128.11	ENSG00000166128.11	RAB8B	chr15:63189468-63267782	Ctrl	siHIF1A	OK	39.6521	30.8717	-0.361109	-1.4673	0.0002	0.00207831	yes
ENSG00000166387.10	ENSG00000166387.10	PPFIBP2	chr11:7513297-7657127	Ctrl	siHIF1A	OK	2.64787	1.33758	-0.985202	-1.07494	0.0002	0.00207831	yes
ENSG00000169131.9	ENSG00000169131.9	ZNF354A	chr5:178711591-178730702	Ctrl	siHIF1A	OK	4.21635	5.9176	0.489019	1.49519	0.0002	0.00207831	yes
ENSG00000169413.2	ENSG00000169413.2	RNASE6	chr14:20781050-20782467	Ctrl	siHIF1A	OK	1.02983	0.389082	-1.40426	-1.81512	0.0002	0.00207831	yes
ENSG00000173660.10	ENSG00000173660.10	UQCRH	chr1:46303630-46316776	Ctrl	siHIF1A	OK	209.013	162.228	-0.365576	-1.51374	0.0002	0.00207831	yes
ENSG00000180884.9	ENSG00000180884.9	ZNF792	chr19:34956353-34964049	Ctrl	siHIF1A	OK	11.9576	9.17484	-0.382176	-1.49523	0.0002	0.00207831	yes
ENSG00000180938.5	ENSG00000180938.5	ZNF572	chr8:124973297-124979389	Ctrl	siHIF1A	OK	0.2783	0.514268	0.885881	1.6125	0.0002	0.00207831	yes
ENSG00000185885.14	ENSG00000185885.14	IFITM1	chr11:307630-315272	Ctrl	siHIF1A	OK	28.7549	102.706	1.83664	1.92318	0.0002	0.00207831	yes
ENSG00000186185.12	ENSG00000186185.12	KIF18B	chr17:44924708-44947711	Ctrl	siHIF1A	OK	2.11981	1.1566	-0.874047	-1.47668	0.0002	0.00207831	yes
ENSG00000197837.3	ENSG00000197837.3	HIST4H4	chr12:14767998-14771131	Ctrl	siHIF1A	OK	47.5235	35.4501	-0.42285	-1.47842	0.0002	0.00207831	yes
ENSG00000235257.7	ENSG00000235257.7	ITGA9-AS1	chr3:37452114-37861780	Ctrl	siHIF1A	OK	1.30892	2.47466	0.918856	1.1987	0.0002	0.00207831	yes
ENSG00000236393.1	ENSG00000236393.1	RP11-320G24.1	chrX:40262916-40287720	Ctrl	siHIF1A	OK	0.641237	0.110434	-2.53768	-1.40145	0.0002	0.00207831	yes
ENSG00000244694.6	ENSG00000244694.6	PTCHD4	chr6:47878027-48068689	Ctrl	siHIF1A	OK	1.97819	2.79651	0.499449	1.47202	0.0002	0.00207831	yes
ENSG00000247596.7	ENSG00000247596.7	TWF2	chr3:52221079-52241097	Ctrl	siHIF1A	OK	51.3392	39.2985	-0.385584	-1.53659	0.0002	0.00207831	yes
ENSG00000259330.1	ENSG00000259330.1	INAFM2	chr15:40325215-40326715	Ctrl	siHIF1A	OK	14.6769	9.85145	-0.575136	-1.55662	0.0002	0.00207831	yes
ENSG00000260317.1	ENSG00000260317.1	RP11-48B3.4	chr8:80541299-80543104	Ctrl	siHIF1A	OK	0.828663	0.368971	-1.16728	-1.71205	0.0002	0.00207831	yes
ENSG00000270170.1	ENSG00000270170.1	NCBP2-AS2	chr3:196942622-196943540	Ctrl	siHIF1A	OK	7.15522	10.3837	0.537255	1.52106	0.0002	0.00207831	yes
ENSG00000274828.1	ENSG00000274828.1	RP11-567M16.6	chr18:79638927-79679745	Ctrl	siHIF1A	OK	0.940799	1.59634	0.762808	1.62467	0.0002	0.00207831	yes
ENSG00000277462.1	ENSG00000277462.1	ZNF670	chr1:246945546-247078811	Ctrl	siHIF1A	OK	2.40764	1.57113	-0.61581	-1.46887	0.0002	0.00207831	yes
ENSG00000005469.10	ENSG00000005469.10	CROT	chr7:87345680-87399795	Ctrl	siHIF1A	OK	20.5837	13.6823	-0.589192	-1.49107	0.00025	0.00252516	yes
ENSG00000035687.9	ENSG00000035687.9	ADSS	chr1:244352634-244452134	Ctrl	siHIF1A	OK	38.8375	50.8761	0.389538	1.48605	0.00025	0.00252516	yes
ENSG00000065970.7	ENSG00000065970.7	FOXJ2	chr12:8032702-8055503	Ctrl	siHIF1A	OK	2.33504	1.68224	-0.473061	-1.47057	0.00025	0.00252516	yes
ENSG00000067992.11	ENSG00000067992.11	PDK3	chrX:24465220-24539837	Ctrl	siHIF1A	OK	3.89728	2.4888	-0.647018	-1.45574	0.00025	0.00252516	yes
ENSG00000090020.9	ENSG00000090020.9	SLC9A1	chr1:27098814-27166981	Ctrl	siHIF1A	OK	18.3321	11.5665	-0.664416	-1.74816	0.00025	0.00252516	yes
ENSG00000099875.13	ENSG00000099875.13	MKNK2	chr19:2037464-2051244	Ctrl	siHIF1A	OK	65.765	95.2432	0.534296	1.51503	0.00025	0.00252516	yes
ENSG00000099968.16	ENSG00000099968.16	BCL2L13	chr22:17628854-17730855	Ctrl	siHIF1A	OK	25.0187	33.3461	0.414512	1.47161	0.00025	0.00252516	yes
ENSG00000100439.9	ENSG00000100439.9	ABHD4	chr14:22595807-22613215	Ctrl	siHIF1A	OK	11.0845	7.43959	-0.575254	-1.47041	0.00025	0.00252516	yes
ENSG00000105499.12	ENSG00000105499.12	PLA2G4C	chr19:48047842-48110817	Ctrl	siHIF1A	OK	65.5565	46.3412	-0.500443	-1.36892	0.00025	0.00252516	yes
ENSG00000105556.9	ENSG00000105556.9	MIER2	chr19:305572-344807	Ctrl	siHIF1A	OK	8.4487	5.93469	-0.509557	-1.41822	0.00025	0.00252516	yes
ENSG00000109436.7	ENSG00000109436.7	TBC1D9	chr4:140620764-140756120	Ctrl	siHIF1A	OK	14.5045	19.2892	0.411293	1.12395	0.00025	0.00252516	yes
ENSG00000112414.13	ENSG00000112414.13	GPR126	chr6:142301853-142446266	Ctrl	siHIF1A	OK	9.11034	6.32041	-0.527487	-0.991386	0.00025	0.00252516	yes
ENSG00000112697.14	ENSG00000112697.14	TMEM30A	chr6:75252923-75284968	Ctrl	siHIF1A	OK	98.1379	127.775	0.380728	1.37349	0.00025	0.00252516	yes
ENSG00000115738.8	ENSG00000115738.8	ID2	chr2:8666635-8684453	Ctrl	siHIF1A	OK	3.5827	1.89187	-0.921233	-1.60066	0.00025	0.00252516	yes
ENSG00000118762.6	ENSG00000118762.6	PKD2	chr4:88007667-88077777	Ctrl	siHIF1A	OK	7.36839	10.3861	0.49523	1.5497	0.00025	0.00252516	yes
ENSG00000120129.5	ENSG00000120129.5	DUSP1	chr5:172758225-172777774	Ctrl	siHIF1A	OK	29.1791	38.1111	0.385276	1.52637	0.00025	0.00252516	yes
ENSG00000126821.7	ENSG00000126821.7	SGPP1	chr14:63684213-63728039	Ctrl	siHIF1A	OK	6.95306	5.12023	-0.441439	-1.5056	0.00025	0.00252516	yes
ENSG00000129250.10	ENSG00000129250.10	KIF1C	chr17:4997947-5028401	Ctrl	siHIF1A	OK	39.7192	65.1879	0.71477	1.44146	0.00025	0.00252516	yes
ENSG00000131778.16	ENSG00000131778.16	CHD1L	chr1:147172770-147517875	Ctrl	siHIF1A	OK	13.6893	10.1975	-0.424837	-1.21942	0.00025	0.00252516	yes
ENSG00000135124.13	ENSG00000135124.13	P2RX4	chr12:121209856-121234106	Ctrl	siHIF1A	OK	16.716	22.0808	0.401562	1.45496	0.00025	0.00252516	yes
ENSG00000136631.11	ENSG00000136631.11	VPS45	chr1:150067292-150145327	Ctrl	siHIF1A	OK	13.0886	17.974	0.457597	1.47091	0.00025	0.00252516	yes
ENSG00000138600.8	ENSG00000138600.8	SPPL2A	chr15:50702265-50765808	Ctrl	siHIF1A	OK	51.2373	33.8824	-0.596659	-1.42429	0.00025	0.00252516	yes
ENSG00000139629.14	ENSG00000139629.14	GALNT6	chr12:51351246-51515763	Ctrl	siHIF1A	OK	17.1725	27.6397	0.68664	1.245	0.00025	0.00252516	yes
ENSG00000142546.12	ENSG00000142546.12	NOSIP	chr19:49555710-49591015	Ctrl	siHIF1A	OK	23.2277	31.4539	0.437393	1.53105	0.00025	0.00252516	yes
ENSG00000146859.6	ENSG00000146859.6	TMEM140	chr7:134986507-135170795	Ctrl	siHIF1A	OK	20.1762	27.4684	0.445119	1.4124	0.00025	0.00252516	yes
ENSG00000156103.14	ENSG00000156103.14	MMP16	chr8:88032008-88737134	Ctrl	siHIF1A	OK	9.00264	6.09152	-0.563545	-1.35324	0.00025	0.00252516	yes
ENSG00000158470.5	ENSG00000158470.5	B4GALT5	chr20:49632944-49713878	Ctrl	siHIF1A	OK	51.5963	40.1234	-0.362823	-1.5004	0.00025	0.00252516	yes
ENSG00000160949.15	ENSG00000160949.15	TONSL	chr8:144428774-144444444	Ctrl	siHIF1A	OK	2.39001	3.33668	0.481397	1.56165	0.00025	0.00252516	yes
ENSG00000166025.16	ENSG00000166025.16	AMOTL1	chr11:94543839-94925521	Ctrl	siHIF1A	OK	9.62735	12.6181	0.390282	1.21282	0.00025	0.00252516	yes
ENSG00000166922.7	ENSG00000166922.7	SCG5	chr15:32641675-32697098	Ctrl	siHIF1A	OK	0.562817	0.191194	-1.55763	-0.805194	0.00025	0.00252516	yes
ENSG00000171155.7	ENSG00000171155.7	C1GALT1C1	chrX:120625792-120630150	Ctrl	siHIF1A	OK	26.1617	34.1961	0.386375	1.5183	0.00025	0.00252516	yes
ENSG00000171860.4	ENSG00000171860.4	C3AR1	chr12:8058301-8066471	Ctrl	siHIF1A	OK	0.676129	0.196418	-1.78337	-1.5628	0.00025	0.00252516	yes
ENSG00000173402.10	ENSG00000173402.10	DAG1	chr3:49468702-49535618	Ctrl	siHIF1A	OK	17.4445	23.6049	0.436315	1.06646	0.00025	0.00252516	yes
ENSG00000174010.9	ENSG00000174010.9	KLHL15	chrX:23983719-24027186	Ctrl	siHIF1A	OK	1.88969	1.36153	-0.472919	-1.45902	0.00025	0.00252516	yes
ENSG00000175390.11	ENSG00000175390.11	EIF3F	chr11:7970250-8001862	Ctrl	siHIF1A	OK	138.399	176.973	0.354694	1.39822	0.00025	0.00252516	yes
ENSG00000176428.5	ENSG00000176428.5	VPS37D	chr7:73667824-73672112	Ctrl	siHIF1A	OK	2.91856	1.78742	-0.707379	-1.56311	0.00025	0.00252516	yes
ENSG00000181222.13	ENSG00000181222.13	POLR2A	chr17:7484365-7514618	Ctrl	siHIF1A	OK	18.6066	10.8305	-0.780714	-1.20752	0.00025	0.00252516	yes
ENSG00000182952.4	ENSG00000182952.4	HMGN4	chr6:26538404-26546254	Ctrl	siHIF1A	OK	21.5534	16.1409	-0.417194	-1.5233	0.00025	0.00252516	yes
ENSG00000184785.5	ENSG00000184785.5	SMIM10	chrX:134990937-134992473	Ctrl	siHIF1A	OK	1.28616	0.726528	-0.823981	-1.6084	0.00025	0.00252516	yes
ENSG00000185650.9	ENSG00000185650.9	ZFP36L1	chr14:68787659-68796253	Ctrl	siHIF1A	OK	31.2541	22.8814	-0.449869	-1.42472	0.00025	0.00252516	yes
ENSG00000196267.11	ENSG00000196267.11	ZNF836	chr19:52113090-52177002	Ctrl	siHIF1A	OK	3.41472	7.55699	1.14604	1.5567	0.00025	0.00252516	yes
ENSG00000205181.5	ENSG00000205181.5	LINC00654	chr20:5496066-5504613	Ctrl	siHIF1A	OK	0.288146	0.565921	0.973802	1.29149	0.00025	0.00252516	yes
ENSG00000234797.5	ENSG00000234797.5	RPS3AP6	chr15:59768351-59769146	Ctrl	siHIF1A	OK	5.38078	3.49536	-0.622374	-1.55422	0.00025	0.00252516	yes
ENSG00000267469.1	ENSG00000267469.1	AC005944.2	chr19:3052909-3063107	Ctrl	siHIF1A	OK	25.1491	54.6191	1.1189	1.63482	0.00025	0.00252516	yes
ENSG00000276043.3	ENSG00000276043.3	UHRF1	chr19:4903079-4962154	Ctrl	siHIF1A	OK	5.35367	3.9838	-0.426383	-1.4965	0.00025	0.00252516	yes
ENSG00000278588.1	ENSG00000278588.1	HIST1H2BI	chr6:26272975-26273356	Ctrl	siHIF1A	OK	9.77038	5.58441	-0.807009	-1.57735	0.00025	0.00252516	yes
ENSG00000281508.1	ENSG00000281508.1	CDR1-AS	chrX:140782404-140784871	Ctrl	siHIF1A	OK	1.82606	1.12562	-0.698018	-1.41104	0.00025	0.00252516	yes
ENSG00000012660.12	ENSG00000012660.12	ELOVL5	chr6:53267397-53349179	Ctrl	siHIF1A	OK	66.6981	50.9815	-0.387672	-1.42298	0.0003	0.00294087	yes
ENSG00000040608.12	ENSG00000040608.12	RTN4R	chr22:20241414-20283246	Ctrl	siHIF1A	OK	0.658955	0.2967	-1.15118	-0.917072	0.0003	0.00294087	yes
ENSG00000063177.11	ENSG00000063177.11	RPL18	chr19:48615327-48637438	Ctrl	siHIF1A	OK	996.379	758.564	-0.393423	-1.47887	0.0003	0.00294087	yes
ENSG00000065413.15	ENSG00000065413.15	ANKRD44	chr2:196967016-197311173	Ctrl	siHIF1A	OK	5.07239	2.97725	-0.768684	-1.10133	0.0003	0.00294087	yes
ENSG00000070669.15	ENSG00000070669.15	ASNS	chr7:97852117-97872542	Ctrl	siHIF1A	OK	4.90283	3.1743	-0.627176	-1.33485	0.0003	0.00294087	yes
ENSG00000078804.11	ENSG00000078804.11	TP53INP2	chr20:34560541-34825649	Ctrl	siHIF1A	OK	4.69187	2.5996	-0.851877	-1.35855	0.0003	0.00294087	yes
ENSG00000096654.14	ENSG00000096654.14	ZNF184	chr6:27450742-27473118	Ctrl	siHIF1A	OK	2.49231	3.47097	0.477855	1.54675	0.0003	0.00294087	yes
ENSG00000099139.12	ENSG00000099139.12	PCSK5	chr9:75890643-76362339	Ctrl	siHIF1A	OK	2.03473	1.40141	-0.537958	-1.41792	0.0003	0.00294087	yes
ENSG00000104341.15	ENSG00000104341.15	LAPTM4B	chr8:97775056-97853013	Ctrl	siHIF1A	OK	25.2634	18.3104	-0.464381	-1.43312	0.0003	0.00294087	yes
ENSG00000104967.6	ENSG00000104967.6	NOVA2	chr19:45933733-45973546	Ctrl	siHIF1A	OK	4.19585	2.46956	-0.764708	-1.41359	0.0003	0.00294087	yes
ENSG00000105483.15	ENSG00000105483.15	CARD8	chr19:48170691-48287608	Ctrl	siHIF1A	OK	74.9876	51.1116	-0.552999	-1.35833	0.0003	0.00294087	yes
ENSG00000108518.7	ENSG00000108518.7	PFN1	chr17:4945651-4957131	Ctrl	siHIF1A	OK	457.207	342.935	-0.414915	-1.5356	0.0003	0.00294087	yes
ENSG00000108819.10	ENSG00000108819.10	PPP1R9B	chr17:50133734-50150630	Ctrl	siHIF1A	OK	13.6975	19.4543	0.506183	1.60237	0.0003	0.00294087	yes
ENSG00000108984.12	ENSG00000108984.12	MAP2K6	chr17:69414697-69543331	Ctrl	siHIF1A	OK	3.5236	1.88503	-0.902463	-1.52992	0.0003	0.00294087	yes
ENSG00000114739.12	ENSG00000114739.12	ACVR2B	chr3:38451026-38493142	Ctrl	siHIF1A	OK	2.07833	1.44843	-0.520934	-1.55811	0.0003	0.00294087	yes
ENSG00000120688.8	ENSG00000120688.8	WBP4	chr13:40931919-41084006	Ctrl	siHIF1A	OK	2.96878	6.29216	1.08368	1.69223	0.0003	0.00294087	yes
ENSG00000122642.9	ENSG00000122642.9	FKBP9	chr7:32957403-33006931	Ctrl	siHIF1A	OK	29.7735	40.1952	0.432997	1.43346	0.0003	0.00294087	yes
ENSG00000122873.10	ENSG00000122873.10	CISD1	chr10:58269057-58289586	Ctrl	siHIF1A	OK	25.0232	16.9195	-0.564581	-1.49712	0.0003	0.00294087	yes
ENSG00000130958.10	ENSG00000130958.10	SLC35D2	chr9:96320705-96383710	Ctrl	siHIF1A	OK	22.3688	16.5827	-0.431805	-1.47034	0.0003	0.00294087	yes
ENSG00000132646.9	ENSG00000132646.9	PCNA	chr20:5114952-5126626	Ctrl	siHIF1A	OK	35.5478	45.4795	0.355457	1.42189	0.0003	0.00294087	yes
ENSG00000133321.9	ENSG00000133321.9	RARRES3	chr11:63536808-63546462	Ctrl	siHIF1A	OK	4.31326	6.50173	0.592044	1.44163	0.0003	0.00294087	yes
ENSG00000133704.8	ENSG00000133704.8	IPO8	chr12:30628987-30695986	Ctrl	siHIF1A	OK	11.328	7.0909	-0.675856	-1.41925	0.0003	0.00294087	yes
ENSG00000137166.13	ENSG00000137166.13	FOXP4	chr6:41494852-41602384	Ctrl	siHIF1A	OK	1.51921	2.39845	0.658779	1.24927	0.0003	0.00294087	yes
ENSG00000137200.11	ENSG00000137200.11	CMTR1	chr6:37433218-37482827	Ctrl	siHIF1A	OK	14.1814	20.17	0.508212	1.38187	0.0003	0.00294087	yes
ENSG00000137970.7	ENSG00000137970.7	RPL7P9	chr1:96678873-96679620	Ctrl	siHIF1A	OK	12.0529	8.41371	-0.518561	-1.54087	0.0003	0.00294087	yes
ENSG00000140988.14	ENSG00000140988.14	RPS2	chr16:1962051-1964860	Ctrl	siHIF1A	OK	1619.4	1192.31	-0.441703	-1.51308	0.0003	0.00294087	yes
ENSG00000141736.12	ENSG00000141736.12	ERBB2	chr17:39671121-39730787	Ctrl	siHIF1A	OK	10.1686	15.3905	0.597926	1.26733	0.0003	0.00294087	yes
ENSG00000146648.14	ENSG00000146648.14	EGFR	chr7:55019020-55256620	Ctrl	siHIF1A	OK	3.24236	1.94111	-0.740161	-1.15429	0.0003	0.00294087	yes
ENSG00000150764.12	ENSG00000150764.12	DIXDC1	chr11:111927143-112022584	Ctrl	siHIF1A	OK	5.26258	7.02111	0.415929	1.25507	0.0003	0.00294087	yes
ENSG00000150977.10	ENSG00000150977.10	RILPL2	chr12:123410682-123436717	Ctrl	siHIF1A	OK	2.55755	3.36804	0.397147	1.42699	0.0003	0.00294087	yes
ENSG00000151239.12	ENSG00000151239.12	TWF1	chr12:43793722-43806375	Ctrl	siHIF1A	OK	60.4403	47.1967	-0.356823	-1.28268	0.0003	0.00294087	yes
ENSG00000153560.10	ENSG00000153560.10	UBP1	chr3:33277024-33441371	Ctrl	siHIF1A	OK	14.6906	20.2104	0.460206	1.21637	0.0003	0.00294087	yes
ENSG00000154310.15	ENSG00000154310.15	TNIK	chr3:171061338-171460408	Ctrl	siHIF1A	OK	18.2376	11.3678	-0.68196	-1.36987	0.0003	0.00294087	yes
ENSG00000155368.15	ENSG00000155368.15	DBI	chr2:119366920-119372560	Ctrl	siHIF1A	OK	113.358	87.7039	-0.370172	-1.50316	0.0003	0.00294087	yes
ENSG00000157833.11	ENSG00000157833.11	GAREML	chr2:26173090-26189663	Ctrl	siHIF1A	OK	1.65276	0.781169	-1.08117	-1.10298	0.0003	0.00294087	yes
ENSG00000163219.10	ENSG00000163219.10	ARHGAP25	chr2:68679600-68826833	Ctrl	siHIF1A	OK	1.36957	0.582099	-1.23438	-1.08884	0.0003	0.00294087	yes
ENSG00000163491.15	ENSG00000163491.15	NEK10	chr3:27110084-27369460	Ctrl	siHIF1A	OK	3.06996	1.86401	-0.719806	-1.39888	0.0003	0.00294087	yes
ENSG00000166033.10	ENSG00000166033.10	HTRA1	chr10:122461524-122514908	Ctrl	siHIF1A	OK	139.921	108.444	-0.367669	-1.47774	0.0003	0.00294087	yes
ENSG00000166225.7	ENSG00000166225.7	FRS2	chr12:69470348-69579789	Ctrl	siHIF1A	OK	9.93518	5.83569	-0.767643	-1.38284	0.0003	0.00294087	yes
ENSG00000170604.4	ENSG00000170604.4	IRF2BP1	chr19:45883606-45886170	Ctrl	siHIF1A	OK	6.90683	9.36297	0.438943	1.4958	0.0003	0.00294087	yes
ENSG00000172115.7	ENSG00000172115.7	CYCS	chr7:25120090-25125361	Ctrl	siHIF1A	OK	33.7484	45.8833	0.44315	1.44782	0.0003	0.00294087	yes
ENSG00000172733.11	ENSG00000172733.11	PURG	chr8:30995801-31033715	Ctrl	siHIF1A	OK	4.01435	2.51964	-0.671949	-1.49074	0.0003	0.00294087	yes
ENSG00000173120.13	ENSG00000173120.13	KDM2A	chr11:67119268-67258087	Ctrl	siHIF1A	OK	15.748	22.3262	0.503574	1.20012	0.0003	0.00294087	yes
ENSG00000175054.13	ENSG00000175054.13	ATR	chr3:142449234-142578826	Ctrl	siHIF1A	OK	10.3133	7.58701	-0.442902	-1.06722	0.0003	0.00294087	yes
ENSG00000179833.4	ENSG00000179833.4	SERTAD2	chr2:64631620-64751005	Ctrl	siHIF1A	OK	4.56431	3.17185	-0.52507	-1.35469	0.0003	0.00294087	yes
ENSG00000184786.5	ENSG00000184786.5	TCTE3	chr6:169740113-169751587	Ctrl	siHIF1A	OK	1.14604	1.77238	0.629033	1.40975	0.0003	0.00294087	yes
ENSG00000186469.7	ENSG00000186469.7	GNG2	chr14:51826194-51979342	Ctrl	siHIF1A	OK	0.730545	0.0684597	-3.41565	-0.441249	0.0003	0.00294087	yes
ENSG00000196562.13	ENSG00000196562.13	SULF2	chr20:47501901-47786616	Ctrl	siHIF1A	OK	96.2181	150.946	0.649649	1.40761	0.0003	0.00294087	yes
ENSG00000197927.11	ENSG00000197927.11	C2orf27A	chr2:131722374-131767404	Ctrl	siHIF1A	OK	13.1778	8.29662	-0.667513	-1.39747	0.0003	0.00294087	yes
ENSG00000265808.3	ENSG00000265808.3	SEC22B	chr1:120150897-120176515	Ctrl	siHIF1A	OK	15.7292	20.8554	0.406971	1.46812	0.0003	0.00294087	yes
ENSG00000267206.4	ENSG00000267206.4	LCN6	chr9:136738166-136748528	Ctrl	siHIF1A	OK	0.0586073	0.875801	3.90145	0.722658	0.0003	0.00294087	yes
ENSG00000046889.17	ENSG00000046889.17	PREX2	chr8:67952117-68237030	Ctrl	siHIF1A	OK	18.8436	13.4892	-0.482264	-1.04712	0.00035	0.0033687	yes
ENSG00000065427.13	ENSG00000065427.13	KARS	chr16:75627473-75761872	Ctrl	siHIF1A	OK	37.6681	50.2937	0.417035	1.28195	0.00035	0.0033687	yes
ENSG00000068400.12	ENSG00000068400.12	GRIPAP1	chrX:48973719-49002264	Ctrl	siHIF1A	OK	9.5933	12.8782	0.424836	1.26437	0.00035	0.0033687	yes
ENSG00000087077.10	ENSG00000087077.10	TRIP6	chr7:100867137-100873454	Ctrl	siHIF1A	OK	39.3634	51.1832	0.378815	1.38247	0.00035	0.0033687	yes
ENSG00000100592.14	ENSG00000100592.14	DAAM1	chr14:59188645-59371405	Ctrl	siHIF1A	OK	12.4904	7.83874	-0.672129	-1.34976	0.00035	0.0033687	yes
ENSG00000102048.14	ENSG00000102048.14	ASB9	chrX:15235287-15270467	Ctrl	siHIF1A	OK	3.14132	1.93969	-0.695545	-1.36479	0.00035	0.0033687	yes
ENSG00000105767.2	ENSG00000105767.2	CADM4	chr19:43622367-43639839	Ctrl	siHIF1A	OK	5.13897	3.12235	-0.718844	-1.52002	0.00035	0.0033687	yes
ENSG00000106012.16	ENSG00000106012.16	IQCE	chr7:2558971-2614734	Ctrl	siHIF1A	OK	4.03859	5.73243	0.505295	1.34715	0.00035	0.0033687	yes
ENSG00000120008.14	ENSG00000120008.14	WDR11	chr10:120761811-120909524	Ctrl	siHIF1A	OK	34.352	24.8637	-0.46635	-1.18055	0.00035	0.0033687	yes
ENSG00000127022.13	ENSG00000127022.13	CANX	chr5:179678582-179730925	Ctrl	siHIF1A	OK	298.698	221.903	-0.42876	-0.929126	0.00035	0.0033687	yes
ENSG00000130803.13	ENSG00000130803.13	ZNF317	chr19:9140379-9163424	Ctrl	siHIF1A	OK	7.69415	12.1989	0.664914	1.56876	0.00035	0.0033687	yes
ENSG00000134308.12	ENSG00000134308.12	YWHAQ	chr2:9583971-9631014	Ctrl	siHIF1A	OK	179.764	139.273	-0.368181	-1.4509	0.00035	0.0033687	yes
ENSG00000135905.17	ENSG00000135905.17	DOCK10	chr2:224765089-225042445	Ctrl	siHIF1A	OK	13.5254	8.96434	-0.593403	-1.02292	0.00035	0.0033687	yes
ENSG00000146802.11	ENSG00000146802.11	TMEM168	chr7:112762381-112790592	Ctrl	siHIF1A	OK	9.4661	6.75402	-0.487025	-1.32314	0.00035	0.0033687	yes
ENSG00000147124.11	ENSG00000147124.11	ZNF41	chrX:47445878-47482946	Ctrl	siHIF1A	OK	1.43463	2.25575	0.652926	1.51363	0.00035	0.0033687	yes
ENSG00000147180.15	ENSG00000147180.15	ZNF711	chrX:85244031-85273362	Ctrl	siHIF1A	OK	1.82731	1.30166	-0.489365	-1.46433	0.00035	0.0033687	yes
ENSG00000149273.13	ENSG00000149273.13	RPS3	chr11:75399485-75422280	Ctrl	siHIF1A	OK	1664.32	1216.97	-0.45164	-1.45255	0.00035	0.0033687	yes
ENSG00000160208.12	ENSG00000160208.12	RRP1B	chr21:43659547-43696079	Ctrl	siHIF1A	OK	18.7375	14.5531	-0.364602	-1.50171	0.00035	0.0033687	yes
ENSG00000165899.9	ENSG00000165899.9	OTOGL	chr12:80209452-80379090	Ctrl	siHIF1A	OK	0.795523	0.376027	-1.08107	-1.51702	0.00035	0.0033687	yes
ENSG00000168765.14	ENSG00000168765.14	GSTM4	chr1:109656080-109709551	Ctrl	siHIF1A	OK	2.90518	1.28873	-1.17268	-1.54814	0.00035	0.0033687	yes
ENSG00000170035.14	ENSG00000170035.14	UBE2E3	chr2:180967247-181399559	Ctrl	siHIF1A	OK	32.689	25.1531	-0.378068	-1.42943	0.00035	0.0033687	yes
ENSG00000178537.8	ENSG00000178537.8	SLC25A20	chr3:48856930-48898993	Ctrl	siHIF1A	OK	5.09114	7.30993	0.521869	1.53555	0.00035	0.0033687	yes
ENSG00000184867.12	ENSG00000184867.12	ARMCX2	chrX:101655280-101659891	Ctrl	siHIF1A	OK	15.1974	22.7386	0.58132	1.34289	0.00035	0.0033687	yes
ENSG00000185527.10	ENSG00000185527.10	PDE6G	chr17:81650458-81663112	Ctrl	siHIF1A	OK	0.66136	0.193993	-1.76943	-0.993769	0.00035	0.0033687	yes
ENSG00000187109.12	ENSG00000187109.12	NAP1L1	chr12:76036586-76085033	Ctrl	siHIF1A	OK	264.632	204.688	-0.370559	-1.24256	0.00035	0.0033687	yes
ENSG00000188488.12	ENSG00000188488.12	SERPINA5	chr14:94561090-94624646	Ctrl	siHIF1A	OK	0.603592	0.25477	-1.24438	-0.689879	0.00035	0.0033687	yes
ENSG00000197579.6	ENSG00000197579.6	TOPORS	chr9:32540543-32573184	Ctrl	siHIF1A	OK	6.35318	8.8965	0.485759	1.51142	0.00035	0.0033687	yes
ENSG00000241360.1	ENSG00000241360.1	PDXP	chr22:37634653-37666934	Ctrl	siHIF1A	OK	4.08536	6.04916	0.566272	1.50929	0.00035	0.0033687	yes
ENSG00000271383.5	ENSG00000271383.5	NBPF19	chr1:149390622-149556361	Ctrl	siHIF1A	OK	0.778193	0.485374	-0.681033	-1.47672	0.00035	0.0033687	yes
ENSG00000272221.1	ENSG00000272221.1	XXbac-BPG181B23.7	chr6:31394288-31395495	Ctrl	siHIF1A	OK	0.904531	1.60454	0.826922	1.591	0.00035	0.0033687	yes
ENSG00000275835.3	ENSG00000275835.3	TUBGCP5	chr15:22983191-23039673	Ctrl	siHIF1A	OK	3.21245	5.45049	0.762713	1.45078	0.00035	0.0033687	yes
ENSG00000277287.1	ENSG00000277287.1	RP4-794I6.4	chr20:3239704-3245382	Ctrl	siHIF1A	OK	0.361997	0.581323	0.683362	1.48424	0.00035	0.0033687	yes
ENSG00000005059.14	ENSG00000005059.14	CCDC109B	chr4:109560204-109703583	Ctrl	siHIF1A	OK	23.5354	16.2579	-0.533695	-1.40926	0.0004	0.00378549	yes
ENSG00000031691.6	ENSG00000031691.6	CENPQ	chr6:49463377-49493107	Ctrl	siHIF1A	OK	2.19459	1.40839	-0.639905	-1.50582	0.0004	0.00378549	yes
ENSG00000079150.16	ENSG00000079150.16	FKBP7	chr2:178463663-178478600	Ctrl	siHIF1A	OK	7.83861	11.4269	0.543762	1.40929	0.0004	0.00378549	yes
ENSG00000101417.10	ENSG00000101417.10	PXMP4	chr20:33702753-33720319	Ctrl	siHIF1A	OK	1.68655	3.25095	0.94679	1.49016	0.0004	0.00378549	yes
ENSG00000103005.10	ENSG00000103005.10	USB1	chr16:57994667-58021618	Ctrl	siHIF1A	OK	10.42	6.22945	-0.742183	-1.43642	0.0004	0.00378549	yes
ENSG00000105849.5	ENSG00000105849.5	TWISTNB	chr7:19695461-19709087	Ctrl	siHIF1A	OK	10.7971	8.25286	-0.387671	-1.41744	0.0004	0.00378549	yes
ENSG00000117153.14	ENSG00000117153.14	KLHL12	chr1:202891099-202928636	Ctrl	siHIF1A	OK	8.19941	10.642	0.376173	1.42181	0.0004	0.00378549	yes
ENSG00000125703.13	ENSG00000125703.13	ATG4C	chr1:62784134-62865513	Ctrl	siHIF1A	OK	3.29248	4.71066	0.516756	1.3723	0.0004	0.00378549	yes
ENSG00000127955.14	ENSG00000127955.14	GNAI1	chr7:80133954-80219402	Ctrl	siHIF1A	OK	6.73525	3.96212	-0.765458	-1.55356	0.0004	0.00378549	yes
ENSG00000134531.8	ENSG00000134531.8	EMP1	chr12:13196715-13219939	Ctrl	siHIF1A	OK	106.698	172.725	0.694952	1.46337	0.0004	0.00378549	yes
ENSG00000137821.10	ENSG00000137821.10	LRRC49	chr15:70829129-71053657	Ctrl	siHIF1A	OK	3.40747	2.06755	-0.72078	-0.971124	0.0004	0.00378549	yes
ENSG00000140280.12	ENSG00000140280.12	LYSMD2	chr15:51723010-51816368	Ctrl	siHIF1A	OK	8.43455	4.15417	-1.02175	-1.62349	0.0004	0.00378549	yes
ENSG00000141574.6	ENSG00000141574.6	SECTM1	chr17:82321023-82334074	Ctrl	siHIF1A	OK	1.62422	3.15909	0.959758	1.37151	0.0004	0.00378549	yes
ENSG00000143878.9	ENSG00000143878.9	RHOB	chr2:20447073-20449445	Ctrl	siHIF1A	OK	345.975	265.756	-0.380564	-1.47125	0.0004	0.00378549	yes
ENSG00000145908.11	ENSG00000145908.11	ZNF300	chr5:150846522-150904983	Ctrl	siHIF1A	OK	2.58654	3.47776	0.427134	1.41373	0.0004	0.00378549	yes
ENSG00000146409.9	ENSG00000146409.9	SLC18B1	chr6:132769369-132798553	Ctrl	siHIF1A	OK	12.9175	9.92072	-0.380806	-1.37093	0.0004	0.00378549	yes
ENSG00000153786.11	ENSG00000153786.11	ZDHHC7	chr16:84974180-85011535	Ctrl	siHIF1A	OK	18.3708	24.6401	0.423591	1.38633	0.0004	0.00378549	yes
ENSG00000163710.6	ENSG00000163710.6	PCOLCE2	chr3:142815921-142889203	Ctrl	siHIF1A	OK	0.81795	0.357558	-1.19384	-0.929267	0.0004	0.00378549	yes
ENSG00000174099.9	ENSG00000174099.9	MSRB3	chr12:65278642-65642372	Ctrl	siHIF1A	OK	11.544	16.6728	0.530355	1.36304	0.0004	0.00378549	yes
ENSG00000179240.7	ENSG00000179240.7	RP11-111M22.2	chr11:76381312-76414619	Ctrl	siHIF1A	OK	0.60861	1.12782	0.889945	1.31276	0.0004	0.00378549	yes
ENSG00000180626.9	ENSG00000180626.9	ZNF594	chr17:5179535-5191883	Ctrl	siHIF1A	OK	0.910235	1.94952	1.09881	1.47896	0.0004	0.00378549	yes
ENSG00000182197.9	ENSG00000182197.9	EXT1	chr8:117794489-118111853	Ctrl	siHIF1A	OK	24.4278	36.42	0.576206	1.38564	0.0004	0.00378549	yes
ENSG00000182220.12	ENSG00000182220.12	ATP6AP2	chrX:40580907-40606637	Ctrl	siHIF1A	OK	82.6058	105.5	0.352929	1.40038	0.0004	0.00378549	yes
ENSG00000187735.11	ENSG00000187735.11	TCEA1	chr8:53966551-54022529	Ctrl	siHIF1A	OK	38.7486	30.2533	-0.35705	-1.32629	0.0004	0.00378549	yes
ENSG00000197329.10	ENSG00000197329.10	PELI1	chr2:64092651-64252859	Ctrl	siHIF1A	OK	11.7034	15.7979	0.432796	1.2995	0.0004	0.00378549	yes
ENSG00000197816.12	ENSG00000197816.12	CCDC180	chr9:97156569-97378524	Ctrl	siHIF1A	OK	0.359819	0.972456	1.43436	0.99793	0.0004	0.00378549	yes
ENSG00000198612.9	ENSG00000198612.9	COPS8	chr2:237059433-237100466	Ctrl	siHIF1A	OK	37.7825	50.3014	0.412881	1.49572	0.0004	0.00378549	yes
ENSG00000198908.10	ENSG00000198908.10	BHLHB9	chrX:102720687-102753540	Ctrl	siHIF1A	OK	5.254	3.68392	-0.512175	-1.27267	0.0004	0.00378549	yes
ENSG00000213203.2	ENSG00000213203.2	GIMAP1	chr7:150716556-150750094	Ctrl	siHIF1A	OK	8.67999	12.1996	0.491067	1.29791	0.0004	0.00378549	yes
ENSG00000228801.5	ENSG00000228801.5	RP11-110G21.1	chr8:51899324-51947173	Ctrl	siHIF1A	OK	1.14268	2.26463	0.986859	1.52066	0.0004	0.00378549	yes
ENSG00000084764.9	ENSG00000084764.9	MAPRE3	chr2:26847746-27027196	Ctrl	siHIF1A	OK	4.09077	2.76622	-0.564456	-1.37762	0.00045	0.00419086	yes
ENSG00000085449.13	ENSG00000085449.13	WDFY1	chr2:223855715-223945387	Ctrl	siHIF1A	OK	53.3374	38.2058	-0.481358	-1.12461	0.00045	0.00419086	yes
ENSG00000085491.14	ENSG00000085491.14	SLC25A24	chr1:108134035-108202743	Ctrl	siHIF1A	OK	22.3418	28.8415	0.3684	1.44813	0.00045	0.00419086	yes
ENSG00000089685.13	ENSG00000089685.13	BIRC5	chr17:78214185-78225636	Ctrl	siHIF1A	OK	9.07911	6.4697	-0.488852	-1.31924	0.00045	0.00419086	yes
ENSG00000100336.16	ENSG00000100336.16	APOL4	chr22:36189123-36204840	Ctrl	siHIF1A	OK	0.786232	0.372547	-1.07753	-0.865246	0.00045	0.00419086	yes
ENSG00000100916.12	ENSG00000100916.12	BRMS1L	chr14:35819223-36067190	Ctrl	siHIF1A	OK	5.76438	3.50951	-0.715896	-1.20072	0.00045	0.00419086	yes
ENSG00000105520.9	ENSG00000105520.9	LPPR2	chr19:11355385-11365698	Ctrl	siHIF1A	OK	15.4467	11.4832	-0.427782	-1.32078	0.00045	0.00419086	yes
ENSG00000108947.4	ENSG00000108947.4	EFNB3	chr17:7705201-7711378	Ctrl	siHIF1A	OK	0.612867	0.339169	-0.85357	-1.51755	0.00045	0.00419086	yes
ENSG00000113300.10	ENSG00000113300.10	CNOT6	chr5:180494411-180578405	Ctrl	siHIF1A	OK	10.1391	6.98876	-0.536822	-1.49656	0.00045	0.00419086	yes
ENSG00000113328.17	ENSG00000113328.17	CCNG1	chr5:163437568-163446151	Ctrl	siHIF1A	OK	199.08	152.856	-0.381183	-1.29599	0.00045	0.00419086	yes
ENSG00000116096.5	ENSG00000116096.5	SPR	chr2:72887359-72892158	Ctrl	siHIF1A	OK	22.0054	16.9316	-0.378138	-1.4238	0.00045	0.00419086	yes
ENSG00000119812.17	ENSG00000119812.17	FAM98A	chr2:33583657-33599382	Ctrl	siHIF1A	OK	22.5393	30.4213	0.432636	1.17517	0.00045	0.00419086	yes
ENSG00000133731.8	ENSG00000133731.8	IMPA1	chr8:81657960-81686693	Ctrl	siHIF1A	OK	17.2718	12.6846	-0.445341	-1.38124	0.00045	0.00419086	yes
ENSG00000136628.16	ENSG00000136628.16	EPRS	chr1:219968600-220046658	Ctrl	siHIF1A	OK	24.4055	31.0095	0.345507	1.14828	0.00045	0.00419086	yes
ENSG00000138768.13	ENSG00000138768.13	USO1	chr4:75724592-75814286	Ctrl	siHIF1A	OK	24.8713	31.6805	0.349112	1.22495	0.00045	0.00419086	yes
ENSG00000152763.15	ENSG00000152763.15	WDR78	chr1:66812884-66924887	Ctrl	siHIF1A	OK	1.28121	2.45837	0.940191	1.2255	0.00045	0.00419086	yes
ENSG00000156983.14	ENSG00000156983.14	BRPF1	chr3:9731728-9748018	Ctrl	siHIF1A	OK	4.63213	6.97195	0.589884	1.31104	0.00045	0.00419086	yes
ENSG00000164032.10	ENSG00000164032.10	H2AFZ	chr4:99948085-100215505	Ctrl	siHIF1A	OK	187.578	147.765	-0.344188	-1.39737	0.00045	0.00419086	yes
ENSG00000164587.10	ENSG00000164587.10	RPS14	chr5:150443189-150449756	Ctrl	siHIF1A	OK	756.892	576.484	-0.392808	-1.42394	0.00045	0.00419086	yes
ENSG00000165389.6	ENSG00000165389.6	SPTSSA	chr14:33924230-34462774	Ctrl	siHIF1A	OK	11.5627	8.14253	-0.505929	-1.45118	0.00045	0.00419086	yes
ENSG00000171206.12	ENSG00000171206.12	TRIM8	chr10:102644495-102658407	Ctrl	siHIF1A	OK	37.0244	28.3509	-0.385082	-1.43868	0.00045	0.00419086	yes
ENSG00000172985.10	ENSG00000172985.10	SH3RF3	chr2:109129347-109504632	Ctrl	siHIF1A	OK	5.25495	4.00889	-0.390474	-1.43037	0.00045	0.00419086	yes
ENSG00000182831.10	ENSG00000182831.10	C16orf72	chr16:9091647-9121640	Ctrl	siHIF1A	OK	25.5519	19.8176	-0.366647	-1.42706	0.00045	0.00419086	yes
ENSG00000184009.8	ENSG00000184009.8	ACTG1	chr17:81509970-81527776	Ctrl	siHIF1A	OK	2362.62	1565.79	-0.593502	-1.29957	0.00045	0.00419086	yes
ENSG00000188994.11	ENSG00000188994.11	ZNF292	chr6:87151158-87264196	Ctrl	siHIF1A	OK	13.3355	8.89332	-0.584477	-1.20536	0.00045	0.00419086	yes
ENSG00000197646.7	ENSG00000197646.7	PDCD1LG2	chr9:5510569-5571254	Ctrl	siHIF1A	OK	6.34815	8.41144	0.406016	1.45254	0.00045	0.00419086	yes
ENSG00000197858.9	ENSG00000197858.9	GPAA1	chr8:144082589-144086216	Ctrl	siHIF1A	OK	26.3852	36.9675	0.486532	1.48807	0.00045	0.00419086	yes
ENSG00000205221.11	ENSG00000205221.11	VIT	chr2:36696689-36814792	Ctrl	siHIF1A	OK	0.506676	0.208821	-1.27879	-1.1799	0.00045	0.00419086	yes
ENSG00000232931.4	ENSG00000232931.4	LINC00342	chr2:95807117-95816215	Ctrl	siHIF1A	OK	1.4577	2.14267	0.555716	1.32826	0.00045	0.00419086	yes
ENSG00000013583.7	ENSG00000013583.7	HEBP1	chr12:12927725-13000273	Ctrl	siHIF1A	OK	19.2991	14.1234	-0.450449	-1.36192	0.0005	0.00458847	yes
ENSG00000043093.12	ENSG00000043093.12	DCUN1D1	chr3:182938073-182985953	Ctrl	siHIF1A	OK	12.0565	7.71667	-0.643764	-1.47117	0.0005	0.00458847	yes
ENSG00000067066.15	ENSG00000067066.15	SP100	chr2:230415941-230580006	Ctrl	siHIF1A	OK	71.3165	96.9531	0.443051	1.35443	0.0005	0.00458847	yes
ENSG00000088340.14	ENSG00000088340.14	FER1L4	chr20:35558736-35607562	Ctrl	siHIF1A	OK	8.25642	5.28406	-0.643868	-1.3701	0.0005	0.00458847	yes
ENSG00000095713.12	ENSG00000095713.12	CRTAC1	chr10:97850238-98030828	Ctrl	siHIF1A	OK	2.03575	4.77515	1.22999	1.59451	0.0005	0.00458847	yes
ENSG00000099977.12	ENSG00000099977.12	DDT	chr22:23966900-23983911	Ctrl	siHIF1A	OK	37.6203	27.819	-0.435443	-1.4228	0.0005	0.00458847	yes
ENSG00000110492.14	ENSG00000110492.14	MDK	chr11:46380755-46383837	Ctrl	siHIF1A	OK	155.727	197.349	0.341733	1.39832	0.0005	0.00458847	yes
ENSG00000112655.14	ENSG00000112655.14	PTK7	chr6:43076267-43161719	Ctrl	siHIF1A	OK	8.38585	6.19649	-0.436505	-1.28958	0.0005	0.00458847	yes
ENSG00000115839.16	ENSG00000115839.16	RAB3GAP1	chr2:135052264-135531236	Ctrl	siHIF1A	OK	16.8259	23.9411	0.508809	1.36878	0.0005	0.00458847	yes
ENSG00000118276.10	ENSG00000118276.10	B4GALT6	chr18:31622246-31686823	Ctrl	siHIF1A	OK	9.36723	7.01417	-0.41735	-1.35363	0.0005	0.00458847	yes
ENSG00000118855.17	ENSG00000118855.17	MFSD1	chr3:158696891-158829719	Ctrl	siHIF1A	OK	36.3671	49.2957	0.438828	1.39463	0.0005	0.00458847	yes
ENSG00000135828.10	ENSG00000135828.10	RNASEL	chr1:182573633-182589256	Ctrl	siHIF1A	OK	3.16715	2.3845	-0.409498	-1.36963	0.0005	0.00458847	yes
ENSG00000136824.17	ENSG00000136824.17	SMC2	chr9:104094259-104141417	Ctrl	siHIF1A	OK	5.73423	4.27609	-0.423308	-1.4922	0.0005	0.00458847	yes
ENSG00000140332.14	ENSG00000140332.14	TLE3	chr15:70047789-70098176	Ctrl	siHIF1A	OK	11.7276	7.78462	-0.591215	-1.05181	0.0005	0.00458847	yes
ENSG00000143341.10	ENSG00000143341.10	HMCN1	chr1:185734550-186190949	Ctrl	siHIF1A	OK	3.09935	1.68102	-0.882624	-1.28241	0.0005	0.00458847	yes
ENSG00000157613.9	ENSG00000157613.9	CREB3L1	chr11:46277660-46321422	Ctrl	siHIF1A	OK	0.609156	0.226973	-1.42429	-0.970413	0.0005	0.00458847	yes
ENSG00000160408.13	ENSG00000160408.13	ST6GALNAC6	chr9:127866479-127905408	Ctrl	siHIF1A	OK	44.7985	31.7757	-0.495526	-1.27763	0.0005	0.00458847	yes
ENSG00000162878.11	ENSG00000162878.11	PKDCC	chr2:42048019-42058528	Ctrl	siHIF1A	OK	1.79855	0.919518	-0.967883	-1.35775	0.0005	0.00458847	yes
ENSG00000173276.12	ENSG00000173276.12	ZBTB21	chr21:41986830-42024924	Ctrl	siHIF1A	OK	2.40686	3.44104	0.515689	1.18825	0.0005	0.00458847	yes
ENSG00000173821.18	ENSG00000173821.18	RNF213	chr17:80260865-80438086	Ctrl	siHIF1A	OK	58.9775	86.7166	0.556142	0.638235	0.0005	0.00458847	yes
ENSG00000175416.11	ENSG00000175416.11	CLTB	chr5:176365467-176416569	Ctrl	siHIF1A	OK	28.8806	50.0525	0.793339	1.63603	0.0005	0.00458847	yes
ENSG00000177548.11	ENSG00000177548.11	RABEP2	chr16:28878404-28939346	Ctrl	siHIF1A	OK	10.9365	14.8429	0.440623	1.39229	0.0005	0.00458847	yes
ENSG00000178188.13	ENSG00000178188.13	SH2B1	chr16:28846599-28874212	Ctrl	siHIF1A	OK	11.4222	18.2271	0.674247	1.3719	0.0005	0.00458847	yes
ENSG00000182326.13	ENSG00000182326.13	C1S	chr12:6970892-7071032	Ctrl	siHIF1A	OK	0.38956	1.05913	1.44297	0.617286	0.0005	0.00458847	yes
ENSG00000188215.8	ENSG00000188215.8	DCUN1D3	chr16:20610242-20925006	Ctrl	siHIF1A	OK	17.7534	26.9538	0.602388	1.44532	0.0005	0.00458847	yes
ENSG00000196072.10	ENSG00000196072.10	BLOC1S2	chr10:100273279-100286712	Ctrl	siHIF1A	OK	25.3904	19.5078	-0.380228	-1.37343	0.0005	0.00458847	yes
ENSG00000259943.1	ENSG00000259943.1	RP1-39G22.7	chr1:40256426-40257967	Ctrl	siHIF1A	OK	1.74397	2.68136	0.620589	1.4368	0.0005	0.00458847	yes
ENSG00000005243.8	ENSG00000005243.8	COPZ2	chr17:48026166-48038030	Ctrl	siHIF1A	OK	3.24227	5.92624	0.870114	1.32795	0.00055	0.00498794	yes
ENSG00000028277.19	ENSG00000028277.19	POU2F2	chr19:42086109-42196585	Ctrl	siHIF1A	OK	1.3579	0.661558	-1.03744	-0.826249	0.00055	0.00498794	yes
ENSG00000087365.13	ENSG00000087365.13	SF3B2	chr11:66050728-66069619	Ctrl	siHIF1A	OK	39.7948	53.6232	0.430275	1.28605	0.00055	0.00498794	yes
ENSG00000087448.8	ENSG00000087448.8	KLHL42	chr12:27779820-27803040	Ctrl	siHIF1A	OK	15.918	10.7663	-0.564141	-1.4463	0.00055	0.00498794	yes
ENSG00000109929.8	ENSG00000109929.8	SC5D	chr11:121292452-121308694	Ctrl	siHIF1A	OK	19.6037	14.7189	-0.413448	-1.32721	0.00055	0.00498794	yes
ENSG00000115129.12	ENSG00000115129.12	TP53I3	chr2:24076525-24201698	Ctrl	siHIF1A	OK	32.2015	42.7232	0.40789	1.40576	0.00055	0.00498794	yes
ENSG00000123643.11	ENSG00000123643.11	SLC36A1	chr5:151437045-151492381	Ctrl	siHIF1A	OK	4.24804	2.89661	-0.552433	-1.23674	0.00055	0.00498794	yes
ENSG00000131873.5	ENSG00000131873.5	CHSY1	chr15:101175722-101251932	Ctrl	siHIF1A	OK	28.842	22.546	-0.355303	-1.39325	0.00055	0.00498794	yes
ENSG00000140465.12	ENSG00000140465.12	CYP1A1	chr15:74719541-74725610	Ctrl	siHIF1A	OK	5.37416	3.94127	-0.447377	-1.38134	0.00055	0.00498794	yes
ENSG00000148303.15	ENSG00000148303.15	RPL7A	chr9:133348213-133351426	Ctrl	siHIF1A	OK	1125.17	853.955	-0.39791	-1.40305	0.00055	0.00498794	yes
ENSG00000152127.7	ENSG00000152127.7	MGAT5	chr2:134119982-134454621	Ctrl	siHIF1A	OK	21.0483	32.0752	0.607755	1.16694	0.00055	0.00498794	yes
ENSG00000164930.10	ENSG00000164930.10	FZD6	chr8:103121031-103332866	Ctrl	siHIF1A	OK	41.5367	32.4415	-0.356544	-1.45091	0.00055	0.00498794	yes
ENSG00000167840.12	ENSG00000167840.12	ZNF232	chr17:5105540-5175034	Ctrl	siHIF1A	OK	2.05904	3.24141	0.654652	1.34256	0.00055	0.00498794	yes
ENSG00000168405.13	ENSG00000168405.13	CMAHP	chr6:25081067-25166555	Ctrl	siHIF1A	OK	1.46012	2.45387	0.748975	1.4314	0.00055	0.00498794	yes
ENSG00000177054.12	ENSG00000177054.12	ZDHHC13	chr11:19117098-19176422	Ctrl	siHIF1A	OK	21.6078	28.0286	0.37535	1.29828	0.00055	0.00498794	yes
ENSG00000179562.2	ENSG00000179562.2	GCC1	chr7:127580617-127602144	Ctrl	siHIF1A	OK	5.07988	7.80845	0.620242	1.40146	0.00055	0.00498794	yes
ENSG00000197019.4	ENSG00000197019.4	SERTAD1	chr19:40421591-40426025	Ctrl	siHIF1A	OK	9.58251	7.17024	-0.418381	-1.46438	0.00055	0.00498794	yes
ENSG00000204604.8	ENSG00000204604.8	ZNF468	chr19:52764194-52857649	Ctrl	siHIF1A	OK	2.48762	4.74288	0.930996	1.17207	0.00055	0.00498794	yes
ENSG00000204681.9	ENSG00000204681.9	GABBR1	chr6:29555514-29633976	Ctrl	siHIF1A	OK	12.9152	7.95857	-0.698486	-1.44286	0.00055	0.00498794	yes
ENSG00000246705.4	ENSG00000246705.4	H2AFJ	chr12:14774382-14778002	Ctrl	siHIF1A	OK	29.4832	39.6942	0.429032	1.45101	0.00055	0.00498794	yes
ENSG00000258376.2	ENSG00000258376.2	RP4-647C14.2	chr14:73237496-73274640	Ctrl	siHIF1A	OK	1.83163	1.03996	-0.8166	-1.54499	0.00055	0.00498794	yes
ENSG00000269858.4	ENSG00000269858.4	EGLN2	chr19:40771647-40900508	Ctrl	siHIF1A	OK	54.6154	72.4305	0.40729	1.40438	0.00055	0.00498794	yes
ENSG00000003989.15	ENSG00000003989.15	SLC7A2	chr8:17497087-17570573	Ctrl	siHIF1A	OK	4.89569	6.56944	0.424256	1.3568	0.0006	0.00538381	yes
ENSG00000051341.12	ENSG00000051341.12	POLQ	chr3:121431426-121546641	Ctrl	siHIF1A	OK	1.11317	0.652646	-0.770301	-1.45683	0.0006	0.00538381	yes
ENSG00000057935.12	ENSG00000057935.12	MTA3	chr2:42494568-42756947	Ctrl	siHIF1A	OK	18.1135	13.6292	-0.410363	-1.2539	0.0006	0.00538381	yes
ENSG00000101935.8	ENSG00000101935.8	AMMECR1	chrX:110194185-110456334	Ctrl	siHIF1A	OK	5.25258	3.72177	-0.497036	-1.32126	0.0006	0.00538381	yes
ENSG00000102981.8	ENSG00000102981.8	PARD6A	chr16:67660945-67662778	Ctrl	siHIF1A	OK	1.67556	2.65804	0.665716	1.40459	0.0006	0.00538381	yes
ENSG00000114948.11	ENSG00000114948.11	ADAM23	chr2:206443538-206621130	Ctrl	siHIF1A	OK	7.30054	5.24545	-0.476939	-1.27061	0.0006	0.00538381	yes
ENSG00000117859.17	ENSG00000117859.17	OSBPL9	chr1:51561865-51878937	Ctrl	siHIF1A	OK	31.5061	44.3191	0.4923	1.1266	0.0006	0.00538381	yes
ENSG00000129355.6	ENSG00000129355.6	CDKN2D	chr19:10566461-10569059	Ctrl	siHIF1A	OK	2.51431	3.79752	0.594896	1.4245	0.0006	0.00538381	yes
ENSG00000154114.11	ENSG00000154114.11	TBCEL	chr11:121024071-121090775	Ctrl	siHIF1A	OK	11.4955	8.55122	-0.426867	-1.21282	0.0006	0.00538381	yes
ENSG00000157554.17	ENSG00000157554.17	ERG	chr21:38380026-38661780	Ctrl	siHIF1A	OK	43.3266	58.2451	0.426883	1.37538	0.0006	0.00538381	yes
ENSG00000167680.14	ENSG00000167680.14	SEMA6B	chr19:4542592-4559808	Ctrl	siHIF1A	OK	110.141	142.774	0.374392	1.40087	0.0006	0.00538381	yes
ENSG00000182899.13	ENSG00000182899.13	RPL35A	chr3:197889074-197960142	Ctrl	siHIF1A	OK	733.04	561.385	-0.3849	-1.44037	0.0006	0.00538381	yes
ENSG00000187239.15	ENSG00000187239.15	FNBP1	chr9:129887186-130043194	Ctrl	siHIF1A	OK	4.71854	6.70459	0.506808	1.10678	0.0006	0.00538381	yes
ENSG00000206053.11	ENSG00000206053.11	HN1L	chr16:1612324-1702280	Ctrl	siHIF1A	OK	19.9225	27.5965	0.47009	1.2717	0.0006	0.00538381	yes
ENSG00000215030.5	ENSG00000215030.5	RPL13P12	chr17:17383376-17384012	Ctrl	siHIF1A	OK	14.7669	10.6534	-0.471059	-1.37178	0.0006	0.00538381	yes
ENSG00000253368.3	ENSG00000253368.3	TRNP1	chr1:26993706-27000898	Ctrl	siHIF1A	OK	22.2716	16.3976	-0.441717	-1.41477	0.0006	0.00538381	yes
ENSG00000264364.2	ENSG00000264364.2	DYNLL2	chr17:58083414-58095536	Ctrl	siHIF1A	OK	5.02942	6.41711	0.351531	1.37199	0.0006	0.00538381	yes
ENSG00000267459.1	ENSG00000267459.1	AC006116.27	chr19:56219669-56393545	Ctrl	siHIF1A	OK	3.44315	7.66826	1.15517	1.51518	0.0006	0.00538381	yes
ENSG00000273812.1	ENSG00000273812.1	WI2-87327B8.2	chr20:62596731-62603115	Ctrl	siHIF1A	OK	0.620692	0.108207	-2.52009	-1.40395	0.0006	0.00538381	yes
ENSG00000279821.1	ENSG00000279821.1	RP11-1334A24.5	chr5:177476630-177479656	Ctrl	siHIF1A	OK	0.488102	0.787387	0.689889	1.46835	0.0006	0.00538381	yes
ENSG00000052802.11	ENSG00000052802.11	MSMO1	chr4:165327622-165343160	Ctrl	siHIF1A	OK	29.4099	22.7969	-0.367465	-1.38719	0.00065	0.00576535	yes
ENSG00000072121.14	ENSG00000072121.14	ZFYVE26	chr14:67701885-67816590	Ctrl	siHIF1A	OK	9.30473	12.601	0.437506	1.0714	0.00065	0.00576535	yes
ENSG00000087502.16	ENSG00000087502.16	ERGIC2	chr12:29149102-29381189	Ctrl	siHIF1A	OK	32.9938	16.7962	-0.974059	-1.42541	0.00065	0.00576535	yes
ENSG00000101546.11	ENSG00000101546.11	RBFA	chr18:80034345-80097088	Ctrl	siHIF1A	OK	7.8435	10.6098	0.435832	1.33087	0.00065	0.00576535	yes
ENSG00000105298.12	ENSG00000105298.12	CACTIN	chr19:3607246-3626815	Ctrl	siHIF1A	OK	8.10698	11.3435	0.484625	1.41496	0.00065	0.00576535	yes
ENSG00000109107.12	ENSG00000109107.12	ALDOC	chr17:28455751-28645454	Ctrl	siHIF1A	OK	9.06473	1.93197	-2.23019	-0.783186	0.00065	0.00576535	yes
ENSG00000131871.13	ENSG00000131871.13	VIMP	chr15:101270816-101277500	Ctrl	siHIF1A	OK	31.5122	40.778	0.37188	1.31901	0.00065	0.00576535	yes
ENSG00000137817.15	ENSG00000137817.15	PARP6	chr15:72241180-72378788	Ctrl	siHIF1A	OK	10.5721	22.706	1.10282	1.27514	0.00065	0.00576535	yes
ENSG00000144354.12	ENSG00000144354.12	CDCA7	chr2:173338218-173368997	Ctrl	siHIF1A	OK	3.3037	2.34569	-0.49407	-1.35104	0.00065	0.00576535	yes
ENSG00000144749.12	ENSG00000144749.12	LRIG1	chr3:66133609-66501263	Ctrl	siHIF1A	OK	29.604	22.7333	-0.380983	-1.14911	0.00065	0.00576535	yes
ENSG00000148082.8	ENSG00000148082.8	SHC3	chr9:89005770-89178767	Ctrl	siHIF1A	OK	3.79159	2.75112	-0.462784	-1.31038	0.00065	0.00576535	yes
ENSG00000148180.15	ENSG00000148180.15	GSN	chr9:121178136-121332843	Ctrl	siHIF1A	OK	117.119	156.234	0.415738	1.34402	0.00065	0.00576535	yes
ENSG00000164967.8	ENSG00000164967.8	RPP25L	chr9:34610485-34612104	Ctrl	siHIF1A	OK	9.11504	12.4151	0.445781	1.34449	0.00065	0.00576535	yes
ENSG00000176170.12	ENSG00000176170.12	SPHK1	chr17:76309485-76387860	Ctrl	siHIF1A	OK	91.2584	65.2038	-0.485002	-1.36566	0.00065	0.00576535	yes
ENSG00000177383.4	ENSG00000177383.4	MAGEF1	chr3:184710366-184712002	Ctrl	siHIF1A	OK	6.06995	4.34139	-0.483529	-1.45602	0.00065	0.00576535	yes
ENSG00000183807.7	ENSG00000183807.7	FAM162B	chr6:116752196-116765723	Ctrl	siHIF1A	OK	0.689115	0.151013	-2.19007	-2.0021	0.00065	0.00576535	yes
ENSG00000186665.8	ENSG00000186665.8	C17orf58	chr17:67991100-67993649	Ctrl	siHIF1A	OK	11.1708	8.33379	-0.422694	-1.39702	0.00065	0.00576535	yes
ENSG00000188868.12	ENSG00000188868.12	ZNF563	chr19:12317476-12333720	Ctrl	siHIF1A	OK	0.280458	0.669797	1.25594	1.20382	0.00065	0.00576535	yes
ENSG00000196396.8	ENSG00000196396.8	PTPN1	chr20:50510320-50585241	Ctrl	siHIF1A	OK	20.2903	26.005	0.357999	1.4385	0.00065	0.00576535	yes
ENSG00000196950.12	ENSG00000196950.12	SLC39A10	chr2:195575976-195737702	Ctrl	siHIF1A	OK	16.6559	11.4358	-0.542481	-1.46396	0.00065	0.00576535	yes
ENSG00000198346.9	ENSG00000198346.9	ZNF813	chr19:53467734-53496255	Ctrl	siHIF1A	OK	0.631686	1.08231	0.776829	1.32273	0.00065	0.00576535	yes
ENSG00000257027.1	ENSG00000257027.1	RP11-705C15.3	chr12:9658566-9662085	Ctrl	siHIF1A	OK	1.41847	0.899194	-0.657629	-1.44119	0.00065	0.00576535	yes
ENSG00000063241.6	ENSG00000063241.6	ISOC2	chr19:55452984-55462343	Ctrl	siHIF1A	OK	23.6186	30.47	0.367465	1.33773	0.0007	0.00615093	yes
ENSG00000105245.8	ENSG00000105245.8	NUMBL	chr19:40665904-40690972	Ctrl	siHIF1A	OK	6.20634	9.0964	0.551552	1.30176	0.0007	0.00615093	yes
ENSG00000115840.12	ENSG00000115840.12	SLC25A12	chr2:171784369-172082430	Ctrl	siHIF1A	OK	4.36665	7.00625	0.682116	1.16014	0.0007	0.00615093	yes
ENSG00000116852.13	ENSG00000116852.13	KIF21B	chr1:200969389-201023700	Ctrl	siHIF1A	OK	1.16329	0.820265	-0.504044	-1.39233	0.0007	0.00615093	yes
ENSG00000124126.12	ENSG00000124126.12	PREX1	chr20:48624251-48849458	Ctrl	siHIF1A	OK	23.8293	33.9384	0.510181	0.893578	0.0007	0.00615093	yes
ENSG00000131788.14	ENSG00000131788.14	PIAS3	chr1:145845628-145859836	Ctrl	siHIF1A	OK	20.4722	15.0945	-0.43964	-1.3542	0.0007	0.00615093	yes
ENSG00000135069.12	ENSG00000135069.12	PSAT1	chr9:78297142-78330093	Ctrl	siHIF1A	OK	4.00008	2.89028	-0.46882	-1.36775	0.0007	0.00615093	yes
ENSG00000138078.14	ENSG00000138078.14	PREPL	chr2:44275457-44361862	Ctrl	siHIF1A	OK	14.1055	10.9335	-0.367496	-1.21112	0.0007	0.00615093	yes
ENSG00000141519.13	ENSG00000141519.13	CCDC40	chr17:80036631-80100613	Ctrl	siHIF1A	OK	0.881523	1.66939	0.921252	1.06996	0.0007	0.00615093	yes
ENSG00000144909.7	ENSG00000144909.7	OSBPL11	chr3:125528857-125595090	Ctrl	siHIF1A	OK	3.58799	4.59746	0.35766	1.286	0.0007	0.00615093	yes
ENSG00000156273.14	ENSG00000156273.14	BACH1	chr21:29193479-29940033	Ctrl	siHIF1A	OK	16.53	10.8862	-0.602593	-1.05679	0.0007	0.00615093	yes
ENSG00000162733.15	ENSG00000162733.15	DDR2	chr1:162631372-162787400	Ctrl	siHIF1A	OK	12.3927	17.0068	0.456624	1.12072	0.0007	0.00615093	yes
ENSG00000165733.7	ENSG00000165733.7	BMS1	chr10:42782800-42834937	Ctrl	siHIF1A	OK	6.28628	7.92564	0.334319	1.35713	0.0007	0.00615093	yes
ENSG00000171388.11	ENSG00000171388.11	APLN	chrX:129645258-129654937	Ctrl	siHIF1A	OK	312.003	408.483	0.388719	1.39204	0.0007	0.00615093	yes
ENSG00000176845.11	ENSG00000176845.11	METRNL	chr17:83079690-83095119	Ctrl	siHIF1A	OK	32.2439	24.9603	-0.369393	-1.32288	0.0007	0.00615093	yes
ENSG00000184986.9	ENSG00000184986.9	TMEM121	chr14:105526602-105530202	Ctrl	siHIF1A	OK	2.02512	1.14125	-0.827397	-1.3741	0.0007	0.00615093	yes
ENSG00000203760.7	ENSG00000203760.7	CENPW	chr6:126340173-126348875	Ctrl	siHIF1A	OK	9.88547	6.87753	-0.523421	-1.35258	0.0007	0.00615093	yes
ENSG00000228393.3	ENSG00000228393.3	LINC01004	chr7:104941062-105013044	Ctrl	siHIF1A	OK	1.73	3.07552	0.830063	1.4664	0.0007	0.00615093	yes
ENSG00000101447.12	ENSG00000101447.12	FAM83D	chr20:38926311-38953106	Ctrl	siHIF1A	OK	6.31443	4.71401	-0.421699	-1.41472	0.00075	0.00650934	yes
ENSG00000107185.9	ENSG00000107185.9	RGP1	chr9:35749286-35758575	Ctrl	siHIF1A	OK	8.61693	6.34937	-0.44056	-1.41343	0.00075	0.00650934	yes
ENSG00000108387.13	ENSG00000108387.13	2016-09-04	chr17:58519836-58692055	Ctrl	siHIF1A	OK	4.82376	3.37934	-0.513417	-1.15893	0.00075	0.00650934	yes
ENSG00000116005.10	ENSG00000116005.10	PCYOX1	chr2:70257385-70281191	Ctrl	siHIF1A	OK	17.4015	23.5274	0.435126	1.30743	0.00075	0.00650934	yes
ENSG00000118900.13	ENSG00000118900.13	UBN1	chr16:4803202-4882360	Ctrl	siHIF1A	OK	15.708	22.5527	0.5218	0.995532	0.00075	0.00650934	yes
ENSG00000121152.8	ENSG00000121152.8	NCAPH	chr2:96335786-96373845	Ctrl	siHIF1A	OK	1.95595	1.26081	-0.633525	-1.32689	0.00075	0.00650934	yes
ENSG00000121211.6	ENSG00000121211.6	MND1	chr4:153344648-153415118	Ctrl	siHIF1A	OK	0.880486	0.369079	-1.25437	-0.889494	0.00075	0.00650934	yes
ENSG00000125910.5	ENSG00000125910.5	S1PR4	chr19:3172345-3180332	Ctrl	siHIF1A	OK	0.364946	1.15625	1.6637	1.73537	0.00075	0.00650934	yes
ENSG00000129103.16	ENSG00000129103.16	SUMF2	chr7:56064001-56092996	Ctrl	siHIF1A	OK	29.7334	39.9964	0.427787	1.34817	0.00075	0.00650934	yes
ENSG00000135480.13	ENSG00000135480.13	KRT7	chr12:52232519-52309163	Ctrl	siHIF1A	OK	97.7761	137.817	0.495205	1.36692	0.00075	0.00650934	yes
ENSG00000138363.13	ENSG00000138363.13	ATIC	chr2:215311816-215349773	Ctrl	siHIF1A	OK	11.7009	5.82415	-1.0065	-1.4215	0.00075	0.00650934	yes
ENSG00000138433.14	ENSG00000138433.14	CIR1	chr2:174348021-174395715	Ctrl	siHIF1A	OK	5.8808	8.48186	0.528368	1.39155	0.00075	0.00650934	yes
ENSG00000139323.12	ENSG00000139323.12	POC1B	chr12:89419717-89548005	Ctrl	siHIF1A	OK	14.5228	9.17265	-0.662905	-1.10097	0.00075	0.00650934	yes
ENSG00000140395.7	ENSG00000140395.7	WDR61	chr15:78250501-78299924	Ctrl	siHIF1A	OK	23.4188	16.6558	-0.49164	-1.42349	0.00075	0.00650934	yes
ENSG00000144366.14	ENSG00000144366.14	GULP1	chr2:188291668-188595931	Ctrl	siHIF1A	OK	18.1323	12.6411	-0.520441	-1.41909	0.00075	0.00650934	yes
ENSG00000152784.14	ENSG00000152784.14	PRDM8	chr4:80183279-80204329	Ctrl	siHIF1A	OK	0.813506	0.341851	-1.25079	-0.927266	0.00075	0.00650934	yes
ENSG00000163347.5	ENSG00000163347.5	CLDN1	chr3:190305700-190322475	Ctrl	siHIF1A	OK	0.715257	0.381036	-0.908537	-1.13549	0.00075	0.00650934	yes
ENSG00000165072.9	ENSG00000165072.9	MAMDC2	chr9:70033920-70258866	Ctrl	siHIF1A	OK	4.94236	6.5577	0.407988	1.35722	0.00075	0.00650934	yes
ENSG00000188015.8	ENSG00000188015.8	S100A3	chr1:153543612-153550136	Ctrl	siHIF1A	OK	3.07188	4.99956	0.702677	1.41229	0.00075	0.00650934	yes
ENSG00000197442.9	ENSG00000197442.9	MAP3K5	chr6:136557046-136792518	Ctrl	siHIF1A	OK	5.00698	3.82791	-0.387381	-1.27445	0.00075	0.00650934	yes
ENSG00000204628.10	ENSG00000204628.10	GNB2L1	chr5:181236908-181272307	Ctrl	siHIF1A	OK	1163.16	850.433	-0.451784	-1.32101	0.00075	0.00650934	yes
ENSG00000250722.4	ENSG00000250722.4	SEPP1	chr5:42756800-42887392	Ctrl	siHIF1A	OK	0.55822	0.280581	-0.992418	-0.629639	0.00075	0.00650934	yes
ENSG00000274415.1	ENSG00000274415.1	RP11-433J22.2	chr1:147756198-147773362	Ctrl	siHIF1A	OK	4.01784	0.458131	-3.13259	-2.09353	0.00075	0.00650934	yes
ENSG00000280032.1	ENSG00000280032.1	RP11-832A4.7	chr11:118264592-118266817	Ctrl	siHIF1A	OK	0.286	0.534402	0.901911	1.5011	0.00075	0.00650934	yes
ENSG00000108379.8	ENSG00000108379.8	WNT3	chr17:46762505-46833154	Ctrl	siHIF1A	OK	0.899785	0.55551	-0.695767	-1.09777	0.0008	0.0068904	yes
ENSG00000115677.15	ENSG00000115677.15	HDLBP	chr2:241227263-241354027	Ctrl	siHIF1A	OK	153.039	210.551	0.460273	0.721097	0.0008	0.0068904	yes
ENSG00000140553.15	ENSG00000140553.15	UNC45A	chr15:90929963-90963125	Ctrl	siHIF1A	OK	37.3044	52.1323	0.482831	1.33506	0.0008	0.0068904	yes
ENSG00000146678.8	ENSG00000146678.8	IGFBP1	chr7:45888356-45893668	Ctrl	siHIF1A	OK	0.355542	0.723206	1.02439	1.28288	0.0008	0.0068904	yes
ENSG00000147804.8	ENSG00000147804.8	SLC39A4	chr8:144409491-144416895	Ctrl	siHIF1A	OK	3.84634	2.07196	-0.892486	-1.28286	0.0008	0.0068904	yes
ENSG00000148773.11	ENSG00000148773.11	MKI67	chr10:128096658-128126385	Ctrl	siHIF1A	OK	3.56774	1.79386	-0.991942	-1.47943	0.0008	0.0068904	yes
ENSG00000169372.11	ENSG00000169372.11	CRADD	chr12:93677374-93894840	Ctrl	siHIF1A	OK	4.5586	6.43196	0.496668	1.27972	0.0008	0.0068904	yes
ENSG00000182208.11	ENSG00000182208.11	MOB2	chr11:1469456-1501247	Ctrl	siHIF1A	OK	17.2987	23.0489	0.414033	1.31486	0.0008	0.0068904	yes
ENSG00000184661.12	ENSG00000184661.12	CDCA2	chr8:25458996-25507920	Ctrl	siHIF1A	OK	2.52142	1.76312	-0.516107	-1.31263	0.0008	0.0068904	yes
ENSG00000185386.13	ENSG00000185386.13	MAPK11	chr22:50263712-50270767	Ctrl	siHIF1A	OK	9.34156	12.1564	0.37998	1.31151	0.0008	0.0068904	yes
ENSG00000185875.11	ENSG00000185875.11	THNSL1	chr10:24981978-25062279	Ctrl	siHIF1A	OK	1.26145	1.84345	0.547324	1.4315	0.0008	0.0068904	yes
ENSG00000197183.11	ENSG00000197183.11	NOL4L	chr20:32443058-32608893	Ctrl	siHIF1A	OK	19.3671	12.4156	-0.641459	-1.38487	0.0008	0.0068904	yes
ENSG00000198373.11	ENSG00000198373.11	WWP2	chr16:69762305-69941741	Ctrl	siHIF1A	OK	8.9987	13.4997	0.585142	1.31895	0.0008	0.0068904	yes
ENSG00000204103.3	ENSG00000204103.3	MAFB	chr20:40685847-40689240	Ctrl	siHIF1A	OK	1.27214	0.83624	-0.605264	-1.37721	0.0008	0.0068904	yes
ENSG00000260032.1	ENSG00000260032.1	LINC00657	chr20:36045621-36050960	Ctrl	siHIF1A	OK	107.532	136.232	0.341291	1.31976	0.0008	0.0068904	yes
ENSG00000012232.7	ENSG00000012232.7	EXTL3	chr8:28600468-28755599	Ctrl	siHIF1A	OK	16.7264	21.2752	0.347046	1.10601	0.00085	0.00725108	yes
ENSG00000038210.12	ENSG00000038210.12	PI4K2B	chr4:25160640-25279092	Ctrl	siHIF1A	OK	6.95026	9.02548	0.376937	1.37668	0.00085	0.00725108	yes
ENSG00000070087.12	ENSG00000070087.12	PFN2	chr3:149761104-150225190	Ctrl	siHIF1A	OK	67.9825	51.1499	-0.410431	-1.30333	0.00085	0.00725108	yes
ENSG00000109466.12	ENSG00000109466.12	KLHL2	chr4:165070607-165323156	Ctrl	siHIF1A	OK	14.2285	10.1883	-0.481872	-1.28721	0.00085	0.00725108	yes
ENSG00000113269.12	ENSG00000113269.12	RNF130	chr5:179911650-180072118	Ctrl	siHIF1A	OK	24.0978	30.3426	0.332444	1.25039	0.00085	0.00725108	yes
ENSG00000119403.12	ENSG00000119403.12	PHF19	chr9:120855651-120894896	Ctrl	siHIF1A	OK	18.4559	12.5798	-0.552965	-1.35572	0.00085	0.00725108	yes
ENSG00000127463.12	ENSG00000127463.12	EMC1	chr1:19210500-19260128	Ctrl	siHIF1A	OK	29.8882	41.7412	0.481897	1.20849	0.00085	0.00725108	yes
ENSG00000134153.8	ENSG00000134153.8	EMC7	chr15:34084016-34101948	Ctrl	siHIF1A	OK	29.0681	37.2135	0.35639	1.36893	0.00085	0.00725108	yes
ENSG00000135476.10	ENSG00000135476.10	ESPL1	chr12:53268298-53293643	Ctrl	siHIF1A	OK	2.39765	1.22316	-0.971001	-1.37907	0.00085	0.00725108	yes
ENSG00000145779.7	ENSG00000145779.7	TNFAIP8	chr5:119268691-119399688	Ctrl	siHIF1A	OK	5.2891	3.51349	-0.590118	-1.30897	0.00085	0.00725108	yes
ENSG00000159363.16	ENSG00000159363.16	ATP13A2	chr1:16974501-17011928	Ctrl	siHIF1A	OK	40.2457	26.7047	-0.59174	-1.15899	0.00085	0.00725108	yes
ENSG00000162396.5	ENSG00000162396.5	PARS2	chr1:54756897-54764514	Ctrl	siHIF1A	OK	1.79687	2.55711	0.509028	1.38485	0.00085	0.00725108	yes
ENSG00000164048.12	ENSG00000164048.12	ZNF589	chr3:48241099-48301685	Ctrl	siHIF1A	OK	3.17515	4.75472	0.582537	1.22415	0.00085	0.00725108	yes
ENSG00000165030.3	ENSG00000165030.3	NFIL3	chr9:91409044-91423862	Ctrl	siHIF1A	OK	5.05612	3.7941	-0.414275	-1.34575	0.00085	0.00725108	yes
ENSG00000168461.11	ENSG00000168461.11	RAB31	chr18:9708164-9862551	Ctrl	siHIF1A	OK	17.4954	13.1586	-0.410965	-1.04165	0.00085	0.00725108	yes
ENSG00000170889.12	ENSG00000170889.12	RPS9	chr19:54200741-54281184	Ctrl	siHIF1A	OK	756.13	585.528	-0.368897	-1.36794	0.00085	0.00725108	yes
ENSG00000180730.4	ENSG00000180730.4	SHISA2	chr13:26044596-26051031	Ctrl	siHIF1A	OK	1.14662	0.733181	-0.645145	-1.36303	0.00085	0.00725108	yes
ENSG00000228649.7	ENSG00000228649.7	AC005682.5	chr7:22854177-22861579	Ctrl	siHIF1A	OK	2.90001	4.77865	0.720546	1.39137	0.00085	0.00725108	yes
ENSG00000276045.1	ENSG00000276045.1	ORAI1	chr12:121626549-121642677	Ctrl	siHIF1A	OK	23.675	18.1961	-0.379735	-1.37	0.00085	0.00725108	yes
ENSG00000001617.10	ENSG00000001617.10	SEMA3F	chr3:49940006-50189075	Ctrl	siHIF1A	OK	55.688	88.6349	0.670508	1.29271	0.0009	0.00759736	yes
ENSG00000005884.16	ENSG00000005884.16	ITGA3	chr17:50055967-50090481	Ctrl	siHIF1A	OK	52.1354	69.0873	0.406157	0.922192	0.0009	0.00759736	yes
ENSG00000089050.13	ENSG00000089050.13	RBBP9	chr20:18486539-18497243	Ctrl	siHIF1A	OK	6.49534	4.89846	-0.407076	-1.33909	0.0009	0.00759736	yes
ENSG00000104695.11	ENSG00000104695.11	PPP2CB	chr8:30774456-30814314	Ctrl	siHIF1A	OK	61.6132	49.2499	-0.323118	-1.21614	0.0009	0.00759736	yes
ENSG00000113272.12	ENSG00000113272.12	THG1L	chr5:157731196-157741448	Ctrl	siHIF1A	OK	3.62834	2.26772	-0.678064	-1.32252	0.0009	0.00759736	yes
ENSG00000116641.14	ENSG00000116641.14	DOCK7	chr1:62454727-62688368	Ctrl	siHIF1A	OK	7.27023	5.33621	-0.446185	-1.17478	0.0009	0.00759736	yes
ENSG00000124839.11	ENSG00000124839.11	RAB17	chr2:237574321-237601614	Ctrl	siHIF1A	OK	1.01953	0.449998	-1.17991	-0.883406	0.0009	0.00759736	yes
ENSG00000136048.12	ENSG00000136048.12	DRAM1	chr12:101877350-102012130	Ctrl	siHIF1A	OK	18.279	24.8883	0.445282	1.10583	0.0009	0.00759736	yes
ENSG00000152128.13	ENSG00000152128.13	TMEM163	chr2:134455758-134719000	Ctrl	siHIF1A	OK	2.00784	1.29539	-0.632259	-1.37554	0.0009	0.00759736	yes
ENSG00000154839.8	ENSG00000154839.8	SKA1	chr18:50374994-50394173	Ctrl	siHIF1A	OK	2.19126	1.39338	-0.653171	-1.3023	0.0009	0.00759736	yes
ENSG00000161677.10	ENSG00000161677.10	JOSD2	chr19:50505997-50511353	Ctrl	siHIF1A	OK	12.7712	18.3828	0.52546	1.43883	0.0009	0.00759736	yes
[truncated: 58,469 more rows]

## Sheet: DEGs
test_id	gene_id	gene	locus	sample_1	sample_2	status	value_1	value_2	log2(fold_change)	test_stat	p_value	q_value	significant
ENSG00000000971.14	ENSG00000000971.14	CFH	chr1:196651877-196747504	Ctrl	siHIF1A	OK	33.6406	54.6987	0.701303	2.31864	5e-05	0.000604383	yes
ENSG00000002549.11	ENSG00000002549.11	LAP3	chr4:17577191-17614571	Ctrl	siHIF1A	OK	52.8307	83.2564	0.656184	2.49904	5e-05	0.000604383	yes
ENSG00000002822.14	ENSG00000002822.14	MAD1L1	chr7:1815792-2233243	Ctrl	siHIF1A	OK	6.94609	12.0778	0.798088	1.74853	5e-05	0.000604383	yes
ENSG00000003147.16	ENSG00000003147.16	ICA1	chr7:8113183-8344516	Ctrl	siHIF1A	OK	15.4079	22.9102	0.572321	1.56826	5e-05	0.000604383	yes
ENSG00000004799.7	ENSG00000004799.7	PDK4	chr7:95583498-95596491	Ctrl	siHIF1A	OK	2.32558	4.41777	0.925729	2.14468	5e-05	0.000604383	yes
ENSG00000005486.15	ENSG00000005486.15	RHBDD2	chr7:75842601-75888926	Ctrl	siHIF1A	OK	19.5567	13.8012	-0.502868	-1.66568	5e-05	0.000604383	yes
ENSG00000006468.12	ENSG00000006468.12	ETV1	chr7:13891227-13991425	Ctrl	siHIF1A	OK	5.52475	2.092	-1.40102	-2.31025	5e-05	0.000604383	yes
ENSG00000006576.15	ENSG00000006576.15	PHTF2	chr7:77798791-77957503	Ctrl	siHIF1A	OK	8.00596	4.50271	-0.830282	-2.46142	5e-05	0.000604383	yes
ENSG00000007312.11	ENSG00000007312.11	CD79B	chr17:63928739-63932354	Ctrl	siHIF1A	OK	1.87273	0.243637	-2.94233	-1.9562	5e-05	0.000604383	yes
ENSG00000007376.6	ENSG00000007376.6	RPUSD1	chr16:784973-800737	Ctrl	siHIF1A	OK	12.7987	19.478	0.605845	1.72153	5e-05	0.000604383	yes
ENSG00000007908.14	ENSG00000007908.14	SELE	chr1:169662006-169894267	Ctrl	siHIF1A	OK	1.56793	0.58011	-1.43446	-1.40284	5e-05	0.000604383	yes
ENSG00000008282.6	ENSG00000008282.6	SYPL1	chr7:106090502-106112576	Ctrl	siHIF1A	OK	55.6662	41.9021	-0.40978	-1.64269	5e-05	0.000604383	yes
ENSG00000008441.15	ENSG00000008441.15	NFIX	chr19:12995607-13098796	Ctrl	siHIF1A	OK	14.0803	6.91469	-1.02595	-3.2389	5e-05	0.000604383	yes
ENSG00000009780.14	ENSG00000009780.14	FAM76A	chr1:27725978-27763122	Ctrl	siHIF1A	OK	2.59815	4.09696	0.65707	1.73777	5e-05	0.000604383	yes
ENSG00000010319.5	ENSG00000010319.5	SEMA3G	chr3:52433052-52445085	Ctrl	siHIF1A	OK	8.07279	2.67661	-1.59266	-2.64987	5e-05	0.000604383	yes
ENSG00000010327.9	ENSG00000010327.9	STAB1	chr3:52495337-52770949	Ctrl	siHIF1A	OK	206.431	103.621	-0.99434	-1.52048	5e-05	0.000604383	yes
ENSG00000010404.16	ENSG00000010404.16	IDS	chrX:149476989-149550510	Ctrl	siHIF1A	OK	24.7374	11.1162	-1.15403	-2.56017	5e-05	0.000604383	yes
ENSG00000011007.11	ENSG00000011007.11	TCEB3	chr1:23743154-23778287	Ctrl	siHIF1A	OK	10.0443	14.3479	0.514467	1.52096	5e-05	0.000604383	yes
ENSG00000011028.12	ENSG00000011028.12	MRC2	chr17:62626030-62693597	Ctrl	siHIF1A	OK	21.1718	14.0771	-0.588793	-2.02861	5e-05	0.000604383	yes
ENSG00000011426.9	ENSG00000011426.9	ANLN	chr7:36324220-36453791	Ctrl	siHIF1A	OK	11.4536	5.78754	-0.984784	-2.82863	5e-05	0.000604383	yes
ENSG00000011465.15	ENSG00000011465.15	DCN	chr12:91140483-91183123	Ctrl	siHIF1A	OK	0.656836	0.151777	-2.11358	-0.565003	5e-05	0.000604383	yes
ENSG00000012174.10	ENSG00000012174.10	MBTPS2	chrX:21839635-21885424	Ctrl	siHIF1A	OK	3.97015	2.21867	-0.839494	-2.5884	5e-05	0.000604383	yes
ENSG00000013297.9	ENSG00000013297.9	CLDN11	chr3:170418864-170860380	Ctrl	siHIF1A	OK	24.7155	16.8296	-0.554412	-1.68407	5e-05	0.000604383	yes
ENSG00000014914.18	ENSG00000014914.18	MTMR11	chr1:149928650-149936898	Ctrl	siHIF1A	OK	15.955	11.0733	-0.526922	-1.52184	5e-05	0.000604383	yes
ENSG00000015413.8	ENSG00000015413.8	DPEP1	chr16:89613307-89638456	Ctrl	siHIF1A	OK	1.04816	2.78148	1.40799	2.09136	5e-05	0.000604383	yes
ENSG00000015676.16	ENSG00000015676.16	NUDCD3	chr7:44379120-44490880	Ctrl	siHIF1A	OK	22.905	39.3876	0.782082	2.06197	5e-05	0.000604383	yes
ENSG00000018408.13	ENSG00000018408.13	WWTR1	chr3:149517234-149736714	Ctrl	siHIF1A	OK	87.8354	46.7	-0.911379	-3.10867	5e-05	0.000604383	yes
ENSG00000023171.13	ENSG00000023171.13	GRAMD1B	chr11:123525635-123627774	Ctrl	siHIF1A	OK	1.93571	1.14929	-0.752119	-1.73589	5e-05	0.000604383	yes
ENSG00000023445.12	ENSG00000023445.12	BIRC3	chr11:102317449-102339403	Ctrl	siHIF1A	OK	2.31673	1.31206	-0.820256	-1.57246	5e-05	0.000604383	yes
ENSG00000024526.15	ENSG00000024526.15	DEPDC1	chr1:68474151-68538627	Ctrl	siHIF1A	OK	3.55189	1.87434	-0.9222	-1.8827	5e-05	0.000604383	yes
ENSG00000025039.13	ENSG00000025039.13	RRAGD	chr6:89364635-89412270	Ctrl	siHIF1A	OK	0.704634	0.197849	-1.83247	-2.03206	5e-05	0.000604383	yes
ENSG00000026103.18	ENSG00000026103.18	FAS	chr10:88879733-89015785	Ctrl	siHIF1A	OK	8.40546	14.2303	0.759569	1.79639	5e-05	0.000604383	yes
ENSG00000026508.15	ENSG00000026508.15	CD44	chr11:35138869-35232402	Ctrl	siHIF1A	OK	39.772	13.1021	-1.60196	-4.13028	5e-05	0.000604383	yes
ENSG00000026950.15	ENSG00000026950.15	BTN3A1	chr6:26402236-26415216	Ctrl	siHIF1A	OK	5.51881	10.0813	0.869259	2.26466	5e-05	0.000604383	yes
ENSG00000027697.11	ENSG00000027697.11	IFNGR1	chr6:137197483-137219449	Ctrl	siHIF1A	OK	45.5646	33.8835	-0.427331	-1.69166	5e-05	0.000604383	yes
ENSG00000027869.10	ENSG00000027869.10	SH2D2A	chr1:156806242-156881850	Ctrl	siHIF1A	OK	0.708071	0.207825	-1.76852	-1.48637	5e-05	0.000604383	yes
ENSG00000030582.15	ENSG00000030582.15	GRN	chr17:44345245-44353102	Ctrl	siHIF1A	OK	296.681	500.323	0.753948	2.38002	5e-05	0.000604383	yes
ENSG00000035499.11	ENSG00000035499.11	DEPDC1B	chr5:60596911-60700190	Ctrl	siHIF1A	OK	2.33246	0.876586	-1.41188	-2.49738	5e-05	0.000604383	yes
ENSG00000037241.6	ENSG00000037241.6	RPL26L1	chr5:172954785-172969771	Ctrl	siHIF1A	OK	10.48	17.1214	0.708168	2.2039	5e-05	0.000604383	yes
ENSG00000037280.14	ENSG00000037280.14	FLT4	chr5:180601505-180649624	Ctrl	siHIF1A	OK	4.249	8.4394	0.990018	2.63344	5e-05	0.000604383	yes
ENSG00000038274.15	ENSG00000038274.15	MAT2B	chr5:163503113-163519336	Ctrl	siHIF1A	OK	34.8468	49.5327	0.507358	1.96918	5e-05	0.000604383	yes
ENSG00000042493.14	ENSG00000042493.14	CAPG	chr2:85394747-85418432	Ctrl	siHIF1A	OK	13.4302	22.4196	0.739278	1.98278	5e-05	0.000604383	yes
ENSG00000042980.11	ENSG00000042980.11	ADAM28	chr8:24294039-24912073	Ctrl	siHIF1A	OK	1.13492	0.148645	-2.93265	-1.16787	5e-05	0.000604383	yes
ENSG00000047634.13	ENSG00000047634.13	SCML1	chrX:17737448-17754988	Ctrl	siHIF1A	OK	9.10806	4.35632	-1.06403	-3.36994	5e-05	0.000604383	yes
ENSG00000048052.20	ENSG00000048052.20	HDAC9	chr7:18086948-19002416	Ctrl	siHIF1A	OK	6.94737	4.42007	-0.652397	-1.35501	5e-05	0.000604383	yes
ENSG00000049283.16	ENSG00000049283.16	EPN3	chr17:50532542-50555852	Ctrl	siHIF1A	OK	0.329939	1.31483	1.99461	0.628724	5e-05	0.000604383	yes
ENSG00000049540.15	ENSG00000049540.15	ELN	chr7:74027788-74069907	Ctrl	siHIF1A	OK	0.664018	2.15724	1.69989	1.18369	5e-05	0.000604383	yes
ENSG00000050165.16	ENSG00000050165.16	DKK3	chr11:11963105-12009769	Ctrl	siHIF1A	OK	112.051	72.0611	-0.636867	-2.40744	5e-05	0.000604383	yes
ENSG00000051382.7	ENSG00000051382.7	PIK3CB	chr3:138652698-138834938	Ctrl	siHIF1A	OK	6.7925	3.98388	-0.769769	-1.51337	5e-05	0.000604383	yes
ENSG00000052795.11	ENSG00000052795.11	FNIP2	chr4:158769137-159038760	Ctrl	siHIF1A	OK	6.26602	3.61835	-0.792219	-1.66217	5e-05	0.000604383	yes
ENSG00000056277.14	ENSG00000056277.14	ZNF280C	chrX:130202710-130268899	Ctrl	siHIF1A	OK	2.41346	1.48365	-0.701948	-2.1426	5e-05	0.000604383	yes
ENSG00000056558.9	ENSG00000056558.9	TRAF1	chr9:120902392-120929173	Ctrl	siHIF1A	OK	1.07276	0.520857	-1.04237	-2.69987	5e-05	0.000604383	yes
ENSG00000057019.14	ENSG00000057019.14	DCBLD2	chr3:98714329-98901689	Ctrl	siHIF1A	OK	49.8608	71.9624	0.529338	1.28069	5e-05	0.000604383	yes
ENSG00000057757.8	ENSG00000057757.8	PITHD1	chr1:23778404-23788232	Ctrl	siHIF1A	OK	11.5199	16.0902	0.482054	1.65955	5e-05	0.000604383	yes
ENSG00000058085.13	ENSG00000058085.13	LAMC2	chr1:183186237-183244900	Ctrl	siHIF1A	OK	12.0223	19.8618	0.724282	2.30664	5e-05	0.000604383	yes
ENSG00000058799.12	ENSG00000058799.12	YIPF1	chr1:53851718-53889834	Ctrl	siHIF1A	OK	17.9651	11.748	-0.612786	-2.13311	5e-05	0.000604383	yes
ENSG00000059377.14	ENSG00000059377.14	TBXAS1	chr7:139561569-140020325	Ctrl	siHIF1A	OK	5.11307	1.35968	-1.91093	-1.32075	5e-05	0.000604383	yes
ENSG00000059378.11	ENSG00000059378.11	PARP12	chr7:140023743-140063721	Ctrl	siHIF1A	OK	26.0692	37.9629	0.542246	1.55873	5e-05	0.000604383	yes
ENSG00000060491.15	ENSG00000060491.15	OGFR	chr20:62796452-62814000	Ctrl	siHIF1A	OK	5.7191	21.6574	1.921	5.04741	5e-05	0.000604383	yes
ENSG00000060749.13	ENSG00000060749.13	QSER1	chr11:32893177-32993316	Ctrl	siHIF1A	OK	7.77557	4.47415	-0.797337	-1.54712	5e-05	0.000604383	yes
ENSG00000061656.8	ENSG00000061656.8	SPAG4	chr20:35615891-35621049	Ctrl	siHIF1A	OK	10.5766	4.55481	-1.21541	-2.79797	5e-05	0.000604383	yes
ENSG00000063587.13	ENSG00000063587.13	ZNF275	chrX:153334154-153360110	Ctrl	siHIF1A	OK	2.21311	1.40991	-0.650473	-1.98633	5e-05	0.000604383	yes
ENSG00000064205.9	ENSG00000064205.9	WISP2	chr20:44656450-44810338	Ctrl	siHIF1A	OK	0.525037	0.130621	-2.00703	-1.25598	5e-05	0.000604383	yes
ENSG00000064393.14	ENSG00000064393.14	HIPK2	chr7:139561569-140020325	Ctrl	siHIF1A	OK	7.84551	3.82078	-1.038	-3.37746	5e-05	0.000604383	yes
ENSG00000064651.12	ENSG00000064651.12	SLC12A2	chr5:128083765-128189688	Ctrl	siHIF1A	OK	40.1332	27.4073	-0.550236	-1.44646	5e-05	0.000604383	yes
ENSG00000064726.8	ENSG00000064726.8	BTBD1	chr15:82836945-83103443	Ctrl	siHIF1A	OK	41.3975	28.0105	-0.563575	-1.78987	5e-05	0.000604383	yes
ENSG00000065029.13	ENSG00000065029.13	ZNF76	chr6:35258908-35295985	Ctrl	siHIF1A	OK	7.17989	10.9343	0.606829	1.78417	5e-05	0.000604383	yes
ENSG00000065054.12	ENSG00000065054.12	SLC9A3R2	chr16:2025355-2039026	Ctrl	siHIF1A	OK	44.8543	75.8984	0.758822	2.9336	5e-05	0.000604383	yes
ENSG00000065559.13	ENSG00000065559.13	MAP2K4	chr17:11998352-12143830	Ctrl	siHIF1A	OK	12.5209	8.03707	-0.639597	-1.9371	5e-05	0.000604383	yes
ENSG00000065618.15	ENSG00000065618.15	COL17A1	chr10:104031285-104086002	Ctrl	siHIF1A	OK	0.81481	2.00246	1.29724	1.57657	5e-05	0.000604383	yes
ENSG00000066279.15	ENSG00000066279.15	ASPM	chr1:197084127-197146694	Ctrl	siHIF1A	OK	4.19851	1.88138	-1.15808	-3.77959	5e-05	0.000604383	yes
ENSG00000066583.10	ENSG00000066583.10	ISOC1	chr5:129094750-129114028	Ctrl	siHIF1A	OK	11.6052	7.88048	-0.558414	-1.91841	5e-05	0.000604383	yes
ENSG00000067445.19	ENSG00000067445.19	TRO	chrX:54920461-54931431	Ctrl	siHIF1A	OK	3.79299	0.942778	-2.00835	-2.28578	5e-05	0.000604383	yes
ENSG00000067955.12	ENSG00000067955.12	CBFB	chr16:67029115-67101058	Ctrl	siHIF1A	OK	40.119	20.6735	-0.956499	-3.26806	5e-05	0.000604383	yes
ENSG00000068079.6	ENSG00000068079.6	IFI35	chr17:43006724-43014456	Ctrl	siHIF1A	OK	9.81799	25.1858	1.35911	3.83721	5e-05	0.000604383	yes
ENSG00000069667.14	ENSG00000069667.14	RORA	chr15:60479177-61229319	Ctrl	siHIF1A	OK	13.9678	8.45214	-0.724715	-1.47056	5e-05	0.000604383	yes
ENSG00000069702.9	ENSG00000069702.9	TGFBR3	chr1:91680342-91906335	Ctrl	siHIF1A	OK	12.6927	7.81358	-0.699942	-2.27311	5e-05	0.000604383	yes
ENSG00000070061.13	ENSG00000070061.13	IKBKAP	chr9:108867516-108934116	Ctrl	siHIF1A	OK	7.01926	9.63263	0.456612	1.61827	5e-05	0.000604383	yes
ENSG00000070081.14	ENSG00000070081.14	NUCB2	chr11:17208152-17349974	Ctrl	siHIF1A	OK	28.6966	45.0499	0.650642	1.76419	5e-05	0.000604383	yes
ENSG00000070214.14	ENSG00000070214.14	SLC44A1	chr9:105244621-105439171	Ctrl	siHIF1A	OK	30.6816	16.4655	-0.897925	-2.65557	5e-05	0.000604383	yes
ENSG00000070367.14	ENSG00000070367.14	EXOC5	chr14:57200506-57298742	Ctrl	siHIF1A	OK	31.1174	48.8435	0.650446	1.64132	5e-05	0.000604383	yes
ENSG00000070404.8	ENSG00000070404.8	FSTL3	chr19:676364-683390	Ctrl	siHIF1A	OK	18.8238	12.9475	-0.539883	-1.77009	5e-05	0.000604383	yes
ENSG00000070756.12	ENSG00000070756.12	PABPC1	chr8:100685815-100722809	Ctrl	siHIF1A	OK	295.47	196.527	-0.588284	-1.49783	5e-05	0.000604383	yes
ENSG00000071242.10	ENSG00000071242.10	RPS6KA2	chr6:166409363-166957191	Ctrl	siHIF1A	OK	37.2855	21.8796	-0.76903	-2.27789	5e-05	0.000604383	yes
ENSG00000071564.13	ENSG00000071564.13	TCF3	chr19:1609289-1652605	Ctrl	siHIF1A	OK	29.6345	55.98	0.917636	2.62716	5e-05	0.000604383	yes
ENSG00000072163.17	ENSG00000072163.17	LIMS2	chr2:127638380-127681786	Ctrl	siHIF1A	OK	5.95656	14.7788	1.31098	3.54969	5e-05	0.000604383	yes
ENSG00000072840.11	ENSG00000072840.11	EVC	chr4:5711196-5893058	Ctrl	siHIF1A	OK	16.7778	9.72268	-0.787129	-1.398	5e-05	0.000604383	yes
ENSG00000073060.14	ENSG00000073060.14	SCARB1	chr12:124776855-124882668	Ctrl	siHIF1A	OK	24.3902	15.5079	-0.653303	-2.18697	5e-05	0.000604383	yes
ENSG00000073146.14	ENSG00000073146.14	MOV10L1	chr22:50089878-50161690	Ctrl	siHIF1A	OK	14.4909	23.7016	0.70984	2.1889	5e-05	0.000604383	yes
ENSG00000073712.12	ENSG00000073712.12	FERMT2	chr14:52857267-52952435	Ctrl	siHIF1A	OK	42.2339	31.1775	-0.437897	-1.75312	5e-05	0.000604383	yes
ENSG00000073969.17	ENSG00000073969.17	NSF	chr17:46590668-46757464	Ctrl	siHIF1A	OK	4.98056	7.7172	0.631769	1.7203	5e-05	0.000604383	yes
ENSG00000074410.12	ENSG00000074410.12	CA12	chr15:63321377-63382161	Ctrl	siHIF1A	OK	2.10253	0.264847	-2.9889	-2.62607	5e-05	0.000604383	yes
ENSG00000074527.10	ENSG00000074527.10	NTN4	chr12:95551581-95791152	Ctrl	siHIF1A	OK	50.9988	161.318	1.66138	4.93616	5e-05	0.000604383	yes
ENSG00000074800.12	ENSG00000074800.12	ENO1	chr1:8861001-8879894	Ctrl	siHIF1A	OK	899.764	503.639	-0.837155	-2.75373	5e-05	0.000604383	yes
ENSG00000075223.12	ENSG00000075223.12	SEMA3C	chr7:80742537-80922359	Ctrl	siHIF1A	OK	1.61521	0.813037	-0.99033	-1.30992	5e-05	0.000604383	yes
ENSG00000075240.15	ENSG00000075240.15	GRAMD4	chr22:46576011-46679790	Ctrl	siHIF1A	OK	4.68254	8.62751	0.881654	1.26836	5e-05	0.000604383	yes
ENSG00000075275.15	ENSG00000075275.15	CELSR1	chr22:46360833-46537170	Ctrl	siHIF1A	OK	0.643847	1.34928	1.0674	1.733	5e-05	0.000604383	yes
ENSG00000076003.4	ENSG00000076003.4	MCM6	chr2:135839625-135876426	Ctrl	siHIF1A	OK	4.67774	3.27224	-0.515532	-1.66212	5e-05	0.000604383	yes
ENSG00000076067.10	ENSG00000076067.10	RBMS2	chr12:56521928-56636816	Ctrl	siHIF1A	OK	11.7056	17.9317	0.615314	1.52068	5e-05	0.000604383	yes
ENSG00000077232.15	ENSG00000077232.15	DNAJC10	chr2:182716040-182794464	Ctrl	siHIF1A	OK	43.0335	67.5886	0.65132	1.72854	5e-05	0.000604383	yes
ENSG00000077585.12	ENSG00000077585.12	GPR137B	chr1:236142504-236281985	Ctrl	siHIF1A	OK	12.6457	8.25536	-0.615241	-1.70286	5e-05	0.000604383	yes
ENSG00000077713.17	ENSG00000077713.17	SLC25A43	chrX:119399059-119454478	Ctrl	siHIF1A	OK	5.45301	3.31629	-0.717483	-2.14192	5e-05	0.000604383	yes
ENSG00000078081.6	ENSG00000078081.6	LAMP3	chr3:183122212-183163839	Ctrl	siHIF1A	OK	0.831707	2.12282	1.35184	2.89892	5e-05	0.000604383	yes
ENSG00000078808.15	ENSG00000078808.15	SDF4	chr1:1216907-1232031	Ctrl	siHIF1A	OK	66.4078	92.6473	0.480398	1.74708	5e-05	0.000604383	yes
ENSG00000079332.13	ENSG00000079332.13	SAR1A	chr10:70147288-70170523	Ctrl	siHIF1A	OK	31.5345	42.75	0.438991	1.63463	5e-05	0.000604383	yes
ENSG00000079739.14	ENSG00000079739.14	PGM1	chr1:63440769-63660245	Ctrl	siHIF1A	OK	22.4246	8.48427	-1.40222	-4.37778	5e-05	0.000604383	yes
ENSG00000080845.16	ENSG00000080845.16	DLGAP4	chr20:36306335-36573391	Ctrl	siHIF1A	OK	18.0166	12.0444	-0.580957	-1.49997	5e-05	0.000604383	yes
ENSG00000081803.14	ENSG00000081803.14	CADPS2	chr7:122318424-122886759	Ctrl	siHIF1A	OK	11.2419	18.2459	0.698685	2.60298	5e-05	0.000604383	yes
ENSG00000081913.12	ENSG00000081913.12	PHLPP1	chr18:62715449-62980433	Ctrl	siHIF1A	OK	2.32764	4.02498	0.790116	1.81919	5e-05	0.000604383	yes
ENSG00000082397.14	ENSG00000082397.14	EPB41L3	chr18:5392380-5630700	Ctrl	siHIF1A	OK	18.6323	25.4728	0.451154	1.4181	5e-05	0.000604383	yes
ENSG00000082512.13	ENSG00000082512.13	TRAF5	chr1:211326614-211374946	Ctrl	siHIF1A	OK	14.5188	8.23839	-0.817486	-2.50186	5e-05	0.000604383	yes
ENSG00000082515.15	ENSG00000082515.15	MRPL22	chr5:154941069-154969411	Ctrl	siHIF1A	OK	18.7892	26.998	0.522953	1.67704	5e-05	0.000604383	yes
ENSG00000082641.14	ENSG00000082641.14	NFE2L1	chr17:48048328-48061487	Ctrl	siHIF1A	OK	52.3982	94.8597	0.856278	2.59279	5e-05	0.000604383	yes
ENSG00000083312.16	ENSG00000083312.16	TNPO1	chr5:72794404-72916733	Ctrl	siHIF1A	OK	188.858	119.873	-0.655795	-1.64249	5e-05	0.000604383	yes
ENSG00000084444.12	ENSG00000084444.12	KIAA1467	chr12:13044283-13142521	Ctrl	siHIF1A	OK	5.88964	3.64275	-0.693153	-1.98581	5e-05	0.000604383	yes
ENSG00000084463.6	ENSG00000084463.6	WBP11	chr12:14784578-14803540	Ctrl	siHIF1A	OK	5.62886	8.94998	0.669043	1.86809	5e-05	0.000604383	yes
ENSG00000084652.14	ENSG00000084652.14	TXLNA	chr1:32179685-32198285	Ctrl	siHIF1A	OK	20.5491	29.7183	0.532274	2.19692	5e-05	0.000604383	yes
ENSG00000085063.13	ENSG00000085063.13	CD59	chr11:33698260-33736445	Ctrl	siHIF1A	OK	727.104	1273.13	0.808146	2.15325	5e-05	0.000604383	yes
ENSG00000085117.10	ENSG00000085117.10	CD82	chr11:44564426-44620363	Ctrl	siHIF1A	OK	42.5539	23.9095	-0.831707	-2.43766	5e-05	0.000604383	yes
ENSG00000085365.16	ENSG00000085365.16	SCAMP1	chr5:78360582-78479071	Ctrl	siHIF1A	OK	26.5064	19.7694	-0.423073	-1.51856	5e-05	0.000604383	yes
ENSG00000085662.12	ENSG00000085662.12	AKR1B1	chr7:134442349-134459284	Ctrl	siHIF1A	OK	107.448	82.4257	-0.382469	-1.53791	5e-05	0.000604383	yes
ENSG00000086544.2	ENSG00000086544.2	ITPKC	chr19:40691528-40765389	Ctrl	siHIF1A	OK	5.84098	11.2772	0.949124	2.21951	5e-05	0.000604383	yes
ENSG00000086696.9	ENSG00000086696.9	HSD17B2	chr16:82035003-82139631	Ctrl	siHIF1A	OK	0.883462	5.21316	2.56092	3.84426	5e-05	0.000604383	yes
ENSG00000086827.7	ENSG00000086827.7	ZW10	chr11:113733186-113773811	Ctrl	siHIF1A	OK	4.62793	10.6022	1.19592	4.30633	5e-05	0.000604383	yes
ENSG00000087245.11	ENSG00000087245.11	MMP2	chr16:55389699-55506691	Ctrl	siHIF1A	OK	336.746	241.98	-0.476774	-1.37283	5e-05	0.000604383	yes
ENSG00000087253.10	ENSG00000087253.10	LPCAT2	chr16:55508997-55586670	Ctrl	siHIF1A	OK	48.7182	31.7109	-0.61948	-1.57967	5e-05	0.000604383	yes
ENSG00000087586.16	ENSG00000087586.16	AURKA	chr20:56369388-56392337	Ctrl	siHIF1A	OK	10.0597	6.44738	-0.641797	-1.94281	5e-05	0.000604383	yes
ENSG00000088280.17	ENSG00000088280.17	ASAP3	chr1:23428562-23484568	Ctrl	siHIF1A	OK	5.22604	9.64556	0.884147	2.09289	5e-05	0.000604383	yes
ENSG00000088325.14	ENSG00000088325.14	TPX2	chr20:31739270-31801805	Ctrl	siHIF1A	OK	7.29895	4.99483	-0.547254	-2.05648	5e-05	0.000604383	yes
ENSG00000088832.13	ENSG00000088832.13	FKBP1A	chr20:1309908-1393172	Ctrl	siHIF1A	OK	468.039	301.697	-0.633525	-2.18631	5e-05	0.000604383	yes
ENSG00000088881.19	ENSG00000088881.19	EBF4	chr20:2692877-2760108	Ctrl	siHIF1A	OK	2.41477	1.05384	-1.19622	-1.41811	5e-05	0.000604383	yes
ENSG00000088882.7	ENSG00000088882.7	CPXM1	chr20:2794068-2800637	Ctrl	siHIF1A	OK	1.26021	0.191586	-2.7176	-4.30364	5e-05	0.000604383	yes
ENSG00000089127.11	ENSG00000089127.11	OAS1	chr12:112906776-113017751	Ctrl	siHIF1A	OK	17.8468	66.1738	1.8906	2.61016	5e-05	0.000604383	yes
ENSG00000089157.14	ENSG00000089157.14	RPLP0	chr12:120196685-120201235	Ctrl	siHIF1A	OK	1286.07	885.322	-0.53869	-1.8111	5e-05	0.000604383	yes
ENSG00000089597.15	ENSG00000089597.15	GANAB	chr11:62624825-62646726	Ctrl	siHIF1A	OK	53.21	109.291	1.03841	3.28909	5e-05	0.000604383	yes
ENSG00000089737.14	ENSG00000089737.14	DDX24	chr14:94026328-94081245	Ctrl	siHIF1A	OK	24.017	33.7502	0.490839	1.57709	5e-05	0.000604383	yes
ENSG00000090581.8	ENSG00000090581.8	GNPTG	chr16:1351922-1414751	Ctrl	siHIF1A	OK	31.5233	47.647	0.595966	1.603	5e-05	0.000604383	yes
ENSG00000090889.11	ENSG00000090889.11	KIF4A	chrX:70286594-70420832	Ctrl	siHIF1A	OK	2.61238	1.31083	-0.994879	-1.56514	5e-05	0.000604383	yes
ENSG00000091129.18	ENSG00000091129.18	NRCAM	chr7:108147622-108456717	Ctrl	siHIF1A	OK	25.929	15.4902	-0.743213	-2.41926	5e-05	0.000604383	yes
ENSG00000091409.13	ENSG00000091409.13	ITGA6	chr2:172427353-172608669	Ctrl	siHIF1A	OK	47.8288	74.4621	0.638628	1.63796	5e-05	0.000604383	yes
ENSG00000091844.6	ENSG00000091844.6	RGS17	chr6:153004458-153131249	Ctrl	siHIF1A	OK	3.35671	1.56804	-1.09809	-2.63989	5e-05	0.000604383	yes
ENSG00000091879.12	ENSG00000091879.12	ANGPT2	chr8:6403550-6708209	Ctrl	siHIF1A	OK	38.4976	24.6628	-0.642433	-2.17743	5e-05	0.000604383	yes
ENSG00000092010.13	ENSG00000092010.13	PSME1	chr14:24136157-24141588	Ctrl	siHIF1A	OK	59.1369	82.3308	0.477374	1.8486	5e-05	0.000604383	yes
ENSG00000092096.13	ENSG00000092096.13	SLC22A17	chr14:23346305-23352912	Ctrl	siHIF1A	OK	1.28643	0.334154	-1.94479	-1.92564	5e-05	0.000604383	yes
ENSG00000092621.10	ENSG00000092621.10	PHGDH	chr1:119659797-119744215	Ctrl	siHIF1A	OK	1.83612	0.550906	-1.73679	-2.53296	5e-05	0.000604383	yes
ENSG00000092820.16	ENSG00000092820.16	EZR	chr6:158765740-158820593	Ctrl	siHIF1A	OK	27.9374	38.4442	0.460566	1.91369	5e-05	0.000604383	yes
ENSG00000093144.17	ENSG00000093144.17	ECHDC1	chr6:127288709-127343609	Ctrl	siHIF1A	OK	27.5689	12.4894	-1.14234	-3.57219	5e-05	0.000604383	yes
ENSG00000095383.18	ENSG00000095383.18	TBC1D2	chr9:98198998-98255721	Ctrl	siHIF1A	OK	4.10539	10.4912	1.35359	4.58592	5e-05	0.000604383	yes
ENSG00000095397.12	ENSG00000095397.12	DFNB31	chr9:114402079-114505450	Ctrl	siHIF1A	OK	1.27882	0.527422	-1.27778	-1.51787	5e-05	0.000604383	yes
ENSG00000095637.19	ENSG00000095637.19	SORBS1	chr10:95311770-95561414	Ctrl	siHIF1A	OK	1.14133	0.586692	-0.960039	-1.16981	5e-05	0.000604383	yes
ENSG00000095739.10	ENSG00000095739.10	BAMBI	chr10:28677341-28682939	Ctrl	siHIF1A	OK	5.63783	3.26477	-0.788159	-2.3133	5e-05	0.000604383	yes
ENSG00000096060.13	ENSG00000096060.13	FKBP5	chr6:35573584-35728583	Ctrl	siHIF1A	OK	5.78522	8.25195	0.512363	1.93229	5e-05	0.000604383	yes
ENSG00000096092.5	ENSG00000096092.5	TMEM14A	chr6:52671108-52686588	Ctrl	siHIF1A	OK	23.9137	14.6384	-0.708082	-2.37699	5e-05	0.000604383	yes
ENSG00000096433.9	ENSG00000096433.9	ITPR3	chr6:33620364-33711727	Ctrl	siHIF1A	OK	20.102	34.7097	0.787999	2.82087	5e-05	0.000604383	yes
ENSG00000099194.5	ENSG00000099194.5	SCD	chr10:100347123-100364834	Ctrl	siHIF1A	OK	68.2792	35.8897	-0.927874	-3.77814	5e-05	0.000604383	yes
ENSG00000099337.4	ENSG00000099337.4	KCNK6	chr19:38319843-38332076	Ctrl	siHIF1A	OK	2.10388	4.53553	1.10822	2.10946	5e-05	0.000604383	yes
ENSG00000099864.16	ENSG00000099864.16	PALM	chr19:709092-748330	Ctrl	siHIF1A	OK	3.27377	5.87908	0.844638	2.48421	5e-05	0.000604383	yes
ENSG00000099942.11	ENSG00000099942.11	CRKL	chr22:20917425-20953749	Ctrl	siHIF1A	OK	18.6624	10.611	-0.81458	-3.32099	5e-05	0.000604383	yes
ENSG00000100056.10	ENSG00000100056.10	DGCR14	chr22:19130278-19144684	Ctrl	siHIF1A	OK	6.46127	9.83592	0.606243	1.99843	5e-05	0.000604383	yes
ENSG00000100065.13	ENSG00000100065.13	CARD10	chr22:37490361-37519542	Ctrl	siHIF1A	OK	17.25	31.9559	0.88949	2.83415	5e-05	0.000604383	yes
ENSG00000100100.11	ENSG00000100100.11	PIK3IP1	chr22:31281592-31346232	Ctrl	siHIF1A	OK	13.8002	7.69971	-0.841814	-2.19995	5e-05	0.000604383	yes
ENSG00000100106.18	ENSG00000100106.18	TRIOBP	chr22:37681672-37776556	Ctrl	siHIF1A	OK	23.626	50.7112	1.10193	3.26626	5e-05	0.000604383	yes
ENSG00000100151.14	ENSG00000100151.14	PICK1	chr22:38056310-38075701	Ctrl	siHIF1A	OK	4.21584	7.24845	0.781853	1.90173	5e-05	0.000604383	yes
ENSG00000100162.13	ENSG00000100162.13	CENPM	chr22:41938720-41947164	Ctrl	siHIF1A	OK	5.17488	2.57206	-1.0086	-1.95547	5e-05	0.000604383	yes
ENSG00000100216.5	ENSG00000100216.5	TOMM22	chr22:38681947-38685421	Ctrl	siHIF1A	OK	14.9926	40.5275	1.43465	4.29039	5e-05	0.000604383	yes
ENSG00000100234.11	ENSG00000100234.11	TIMP3	chr22:32512551-33058372	Ctrl	siHIF1A	OK	0.669778	0.12527	-2.41864	-3.98243	5e-05	0.000604383	yes
ENSG00000100316.14	ENSG00000100316.14	RPL3	chr22:39312881-39320389	Ctrl	siHIF1A	OK	984.365	709.22	-0.472961	-1.54986	5e-05	0.000604383	yes
ENSG00000100321.13	ENSG00000100321.13	SYNGR1	chr22:39349924-39385588	Ctrl	siHIF1A	OK	1.83606	0.744897	-1.3015	-1.50828	5e-05	0.000604383	yes
ENSG00000100335.11	ENSG00000100335.11	MIEF1	chr22:39499431-39518132	Ctrl	siHIF1A	OK	11.2716	7.6989	-0.549971	-1.58025	5e-05	0.000604383	yes
ENSG00000100342.19	ENSG00000100342.19	APOL1	chr22:36253009-36267530	Ctrl	siHIF1A	OK	10.0053	20.8277	1.05775	3.50989	5e-05	0.000604383	yes
ENSG00000100345.19	ENSG00000100345.19	MYH9	chr22:36281280-36388018	Ctrl	siHIF1A	OK	190.928	291.331	0.609631	1.14325	5e-05	0.000604383	yes
ENSG00000100360.13	ENSG00000100360.13	IFT27	chr22:36758201-36776256	Ctrl	siHIF1A	OK	8.80146	21.087	1.26054	3.0369	5e-05	0.000604383	yes
ENSG00000100368.12	ENSG00000100368.12	CSF2RB	chr22:36913627-36940449	Ctrl	siHIF1A	OK	8.51685	3.08648	-1.46436	-5.2207	5e-05	0.000604383	yes
ENSG00000100376.10	ENSG00000100376.10	FAM118A	chr22:45308967-45341955	Ctrl	siHIF1A	OK	26.1462	14.4599	-0.854545	-2.19854	5e-05	0.000604383	yes
ENSG00000100393.9	ENSG00000100393.9	EP300	chr22:41091785-41197456	Ctrl	siHIF1A	OK	6.65415	4.76675	-0.481251	-1.84772	5e-05	0.000604383	yes
ENSG00000100410.6	ENSG00000100410.6	PHF5A	chr22:41459716-41468725	Ctrl	siHIF1A	OK	11.6032	21.4546	0.886771	2.85285	5e-05	0.000604383	yes
ENSG00000100426.6	ENSG00000100426.6	ZBED4	chr22:49853841-49890078	Ctrl	siHIF1A	OK	4.24088	6.62328	0.643182	2.491	5e-05	0.000604383	yes
ENSG00000100600.13	ENSG00000100600.13	LGMN	chr14:92703806-92748702	Ctrl	siHIF1A	OK	32.888	51.0511	0.634382	2.24805	5e-05	0.000604383	yes
ENSG00000100625.8	ENSG00000100625.8	SIX4	chr14:60709527-60724348	Ctrl	siHIF1A	OK	1.96232	0.849164	-1.20845	-2.94403	5e-05	0.000604383	yes
ENSG00000100644.15	ENSG00000100644.15	HIF1A	chr14:61681040-61796428	Ctrl	siHIF1A	OK	131.029	26.6819	-2.29596	-4.40689	5e-05	0.000604383	yes
ENSG00000100697.13	ENSG00000100697.13	DICER1	chr14:95086227-95179933	Ctrl	siHIF1A	OK	20.1088	12.1295	-0.729305	-1.67936	5e-05	0.000604383	yes
ENSG00000100711.12	ENSG00000100711.12	ZFYVE21	chr14:103715729-103733668	Ctrl	siHIF1A	OK	25.7936	37.8292	0.55249	1.96634	5e-05	0.000604383	yes
ENSG00000100852.11	ENSG00000100852.11	ARHGAP5	chr14:32074945-32159728	Ctrl	siHIF1A	OK	15.8699	10.3562	-0.615791	-2.07614	5e-05	0.000604383	yes
ENSG00000101000.4	ENSG00000101000.4	PROCR	chr20:35172072-35177362	Ctrl	siHIF1A	OK	229.086	146.633	-0.643674	-2.56815	5e-05	0.000604383	yes
ENSG00000101017.12	ENSG00000101017.12	CD40	chr20:46118271-46129863	Ctrl	siHIF1A	OK	11.1978	7.51916	-0.574576	-1.85908	5e-05	0.000604383	yes
ENSG00000101096.18	ENSG00000101096.18	NFATC2	chr20:51386956-51562831	Ctrl	siHIF1A	OK	3.13391	1.32971	-1.23685	-2.81916	5e-05	0.000604383	yes
ENSG00000101166.14	ENSG00000101166.14	SLMO2	chr20:59033144-59042909	Ctrl	siHIF1A	OK	24.003	14.4744	-0.729706	-2.37572	5e-05	0.000604383	yes
ENSG00000101187.14	ENSG00000101187.14	SLCO4A1	chr20:62640718-62685785	Ctrl	siHIF1A	OK	7.51836	3.55838	-1.0792	-2.74046	5e-05	0.000604383	yes
ENSG00000101265.14	ENSG00000101265.14	RASSF2	chr20:4780022-4823645	Ctrl	siHIF1A	OK	23.4204	12.6703	-0.886315	-3.65614	5e-05	0.000604383	yes
ENSG00000101331.14	ENSG00000101331.14	CCM2L	chr20:32010449-32032180	Ctrl	siHIF1A	OK	3.42055	7.14398	1.0625	2.87278	5e-05	0.000604383	yes
ENSG00000101346.10	ENSG00000101346.10	POFUT1	chr20:32207879-32238667	Ctrl	siHIF1A	OK	12.8321	18.9029	0.558843	1.69401	5e-05	0.000604383	yes
ENSG00000101347.8	ENSG00000101347.8	SAMHD1	chr20:36876120-36951843	Ctrl	siHIF1A	OK	14.577	43.2833	1.57012	5.29527	5e-05	0.000604383	yes
ENSG00000101400.5	ENSG00000101400.5	SNTA1	chr20:33407954-33443892	Ctrl	siHIF1A	OK	3.51762	1.56611	-1.16741	-3.07556	5e-05	0.000604383	yes
ENSG00000101439.7	ENSG00000101439.7	CST3	chr20:23626705-23638473	Ctrl	siHIF1A	OK	123.481	165.862	0.425689	1.74625	5e-05	0.000604383	yes
ENSG00000101474.10	ENSG00000101474.10	APMAP	chr20:24962924-24992979	Ctrl	siHIF1A	OK	64.0929	40.2208	-0.672225	-2.78608	5e-05	0.000604383	yes
ENSG00000101665.7	ENSG00000101665.7	SMAD7	chr18:48919852-48950711	Ctrl	siHIF1A	OK	13.3699	5.98741	-1.15898	-3.4175	5e-05	0.000604383	yes
ENSG00000101670.10	ENSG00000101670.10	LIPG	chr18:49560698-49599182	Ctrl	siHIF1A	OK	39.5431	10.3306	-1.93651	-5.97857	5e-05	0.000604383	yes
ENSG00000101752.10	ENSG00000101752.10	MIB1	chr18:21704956-21870957	Ctrl	siHIF1A	OK	18.3059	7.18369	-1.34951	-4.91521	5e-05	0.000604383	yes
ENSG00000101844.16	ENSG00000101844.16	ATG4A	chrX:108091667-108154671	Ctrl	siHIF1A	OK	9.67249	13.8496	0.517885	1.73976	5e-05	0.000604383	yes
ENSG00000101846.6	ENSG00000101846.6	STS	chrX:7219455-7354810	Ctrl	siHIF1A	OK	4.20987	2.52117	-0.73968	-2.69045	5e-05	0.000604383	yes
ENSG00000101911.11	ENSG00000101911.11	PRPS2	chrX:12791354-12824222	Ctrl	siHIF1A	OK	11.2628	6.82148	-0.723403	-2.39987	5e-05	0.000604383	yes
ENSG00000101974.13	ENSG00000101974.13	ATP11C	chrX:139726345-139945276	Ctrl	siHIF1A	OK	19.282	7.77955	-1.3095	-4.47673	5e-05	0.000604383	yes
ENSG00000102100.13	ENSG00000102100.13	SLC35A2	chrX:48903181-48911958	Ctrl	siHIF1A	OK	10.8011	15.9595	0.563236	1.84642	5e-05	0.000604383	yes
ENSG00000102144.12	ENSG00000102144.12	PGK1	chrX:78065187-78129296	Ctrl	siHIF1A	OK	184.335	106.857	-0.78665	-2.04113	5e-05	0.000604383	yes
ENSG00000102181.18	ENSG00000102181.18	CD99L2	chrX:150766336-150898816	Ctrl	siHIF1A	OK	12.0748	17.896	0.567637	2.07483	5e-05	0.000604383	yes
ENSG00000102390.9	ENSG00000102390.9	PBDC1	chrX:76172935-76178204	Ctrl	siHIF1A	OK	3.64443	6.49287	0.833164	2.52618	5e-05	0.000604383	yes
ENSG00000102466.14	ENSG00000102466.14	FGF14	chr13:101452592-102402457	Ctrl	siHIF1A	OK	1.00338	1.76537	0.815112	1.77269	5e-05	0.000604383	yes
ENSG00000102471.12	ENSG00000102471.12	NDFIP2	chr13:79477363-79556075	Ctrl	siHIF1A	OK	17.2633	10.0387	-0.782138	-2.63066	5e-05	0.000604383	yes
ENSG00000102575.9	ENSG00000102575.9	ACP5	chr19:11559373-11619135	Ctrl	siHIF1A	OK	1.07285	10.7774	3.32848	2.98772	5e-05	0.000604383	yes
ENSG00000102580.13	ENSG00000102580.13	DNAJC3	chr13:95677138-95794989	Ctrl	siHIF1A	OK	25.0239	34.4802	0.462464	1.91466	5e-05	0.000604383	yes
ENSG00000102755.9	ENSG00000102755.9	FLT1	chr13:28300343-28495128	Ctrl	siHIF1A	OK	69.7163	40.7311	-0.775364	-2.88673	5e-05	0.000604383	yes
ENSG00000102760.12	ENSG00000102760.12	RGCC	chr13:41457558-41470882	Ctrl	siHIF1A	OK	55.4945	92.1237	0.731226	2.95069	5e-05	0.000604383	yes
ENSG00000102802.8	ENSG00000102802.8	MEDAG	chr13:30881932-30977623	Ctrl	siHIF1A	OK	8.41776	12.4513	0.564792	1.98173	5e-05	0.000604383	yes
ENSG00000102870.5	ENSG00000102870.5	ZNF629	chr16:30778448-30787202	Ctrl	siHIF1A	OK	3.27523	4.74525	0.534889	2.00787	5e-05	0.000604383	yes
ENSG00000102882.10	ENSG00000102882.10	MAPK3	chr16:30114104-30123506	Ctrl	siHIF1A	OK	34.5156	50.0207	0.535276	1.79307	5e-05	0.000604383	yes
ENSG00000102996.4	ENSG00000102996.4	MMP15	chr16:58025565-58046901	Ctrl	siHIF1A	OK	2.27798	3.83248	0.75052	2.156	5e-05	0.000604383	yes
ENSG00000103034.13	ENSG00000103034.13	NDRG4	chr16:58462845-58513628	Ctrl	siHIF1A	OK	75.0519	118.674	0.661042	1.82705	5e-05	0.000604383	yes
ENSG00000103051.17	ENSG00000103051.17	COG4	chr16:70480567-70523565	Ctrl	siHIF1A	OK	14.9341	25.9403	0.796589	2.34667	5e-05	0.000604383	yes
ENSG00000103257.7	ENSG00000103257.7	SLC7A5	chr16:87830022-87869488	Ctrl	siHIF1A	OK	9.76729	5.07502	-0.944543	-3.25964	5e-05	0.000604383	yes
ENSG00000103472.8	ENSG00000103472.8	RRN3P2	chr16:29053731-29220031	Ctrl	siHIF1A	OK	2.50846	1.20935	-1.05257	-2.08819	5e-05	0.000604383	yes
ENSG00000103490.13	ENSG00000103490.13	PYCARD	chr16:31201484-31203452	Ctrl	siHIF1A	OK	21.2138	13.0733	-0.698373	-1.97902	5e-05	0.000604383	yes
ENSG00000103540.15	ENSG00000103540.15	CCP110	chr16:19523810-19553408	Ctrl	siHIF1A	OK	6.75401	4.11317	-0.715493	-1.59928	5e-05	0.000604383	yes
ENSG00000103647.11	ENSG00000103647.11	CORO2B	chr15:68578968-68727806	Ctrl	siHIF1A	OK	2.9688	1.87509	-0.662918	-2.04253	5e-05	0.000604383	yes
ENSG00000103876.10	ENSG00000103876.10	FAH	chr15:80152489-80186946	Ctrl	siHIF1A	OK	11.355	5.88969	-0.947064	-2.68277	5e-05	0.000604383	yes
ENSG00000104231.9	ENSG00000104231.9	ZFAND1	chr8:81701333-81759515	Ctrl	siHIF1A	OK	12.7309	22.3283	0.810545	2.3446	5e-05	0.000604383	yes
ENSG00000104368.16	ENSG00000104368.16	PLAT	chr8:42175232-42207724	Ctrl	siHIF1A	OK	42.8611	62.3515	0.540756	2.07178	5e-05	0.000604383	yes
ENSG00000104419.13	ENSG00000104419.13	NDRG1	chr8:133237170-133302022	Ctrl	siHIF1A	OK	93.7443	60.6856	-0.627377	-1.86908	5e-05	0.000604383	yes
ENSG00000104635.12	ENSG00000104635.12	SLC39A14	chr8:22367248-22434129	Ctrl	siHIF1A	OK	20.5826	31.1712	0.598788	2.13025	5e-05	0.000604383	yes
ENSG00000104679.9	ENSG00000104679.9	R3HCC1	chr8:23270119-23296279	Ctrl	siHIF1A	OK	6.37633	12.9284	1.01974	2.79979	5e-05	0.000604383	yes
ENSG00000104687.11	ENSG00000104687.11	GSR	chr8:30678060-30727926	Ctrl	siHIF1A	OK	30.4849	21.0719	-0.532775	-2.15702	5e-05	0.000604383	yes
ENSG00000104723.19	ENSG00000104723.19	TUSC3	chr8:15417214-15766649	Ctrl	siHIF1A	OK	3.08429	1.4998	-1.04017	-1.63575	5e-05	0.000604383	yes
ENSG00000104765.13	ENSG00000104765.13	BNIP3L	chr8:26379258-26514092	Ctrl	siHIF1A	OK	75.4886	46.3341	-0.704184	-2.34163	5e-05	0.000604383	yes
ENSG00000104856.12	ENSG00000104856.12	RELB	chr19:45001429-45038198	Ctrl	siHIF1A	OK	10.71	7.18326	-0.576248	-1.79369	5e-05	0.000604383	yes
ENSG00000104903.4	ENSG00000104903.4	LYL1	chr19:13099032-13103161	Ctrl	siHIF1A	OK	61.4568	36.1688	-0.764829	-3.04976	5e-05	0.000604383	yes
ENSG00000104964.13	ENSG00000104964.13	AES	chr19:3052909-3063107	Ctrl	siHIF1A	OK	56.4305	113.262	1.00512	3.33092	5e-05	0.000604383	yes
ENSG00000104998.3	ENSG00000104998.3	IL27RA	chr19:14031747-14053216	Ctrl	siHIF1A	OK	2.38118	1.07881	-1.14223	-3.09765	5e-05	0.000604383	yes
ENSG00000105058.10	ENSG00000105058.10	FAM32A	chr19:16185379-16192046	Ctrl	siHIF1A	OK	19.9366	43.6724	1.1313	4.41607	5e-05	0.000604383	yes
ENSG00000105193.7	ENSG00000105193.7	RPS16	chr19:39433206-39435948	Ctrl	siHIF1A	OK	314.298	216.333	-0.53888	-2.06102	5e-05	0.000604383	yes
ENSG00000105220.13	ENSG00000105220.13	GPI	chr19:34359479-34428273	Ctrl	siHIF1A	OK	98.0904	72.3731	-0.438658	-1.63303	5e-05	0.000604383	yes
ENSG00000105223.17	ENSG00000105223.17	PLD3	chr19:40319535-40390187	Ctrl	siHIF1A	OK	75.7131	114.7	0.599248	1.68561	5e-05	0.000604383	yes
ENSG00000105327.14	ENSG00000105327.14	BBC3	chr19:47220821-47232766	Ctrl	siHIF1A	OK	19.5614	29.4398	0.589755	2.15625	5e-05	0.000604383	yes
ENSG00000105379.8	ENSG00000105379.8	ETFB	chr19:51345168-51369003	Ctrl	siHIF1A	OK	15.3049	23.1981	0.600019	2.07242	5e-05	0.000604383	yes
ENSG00000105402.6	ENSG00000105402.6	NAPA	chr19:47484281-47515240	Ctrl	siHIF1A	OK	49.0534	72.7378	0.56835	1.94104	5e-05	0.000604383	yes
ENSG00000105472.11	ENSG00000105472.11	CLEC11A	chr19:50723328-50725718	Ctrl	siHIF1A	OK	9.18887	4.49326	-1.03212	-2.98578	5e-05	0.000604383	yes
ENSG00000105605.6	ENSG00000105605.6	CACNG7	chr19:53909334-53943941	Ctrl	siHIF1A	OK	0.992963	0.212223	-2.22616	-1.60465	5e-05	0.000604383	yes
ENSG00000105639.17	ENSG00000105639.17	JAK3	chr19:17824779-17848071	Ctrl	siHIF1A	OK	4.67103	1.78029	-1.39163	-3.43655	5e-05	0.000604383	yes
ENSG00000105650.20	ENSG00000105650.20	PDE4C	chr19:18204729-18255419	Ctrl	siHIF1A	OK	1.21238	0.340535	-1.83197	-1.02784	5e-05	0.000604383	yes
ENSG00000105825.10	ENSG00000105825.10	TFPI2	chr7:93591572-93911265	Ctrl	siHIF1A	OK	81.3782	129.256	0.667523	1.89259	5e-05	0.000604383	yes
ENSG00000105855.8	ENSG00000105855.8	ITGB8	chr7:20328298-20415754	Ctrl	siHIF1A	OK	6.85677	3.96206	-0.791279	-2.24251	5e-05	0.000604383	yes
ENSG00000105928.12	ENSG00000105928.12	DFNA5	chr7:24698352-24758113	Ctrl	siHIF1A	OK	16.2644	10.855	-0.583349	-1.77548	5e-05	0.000604383	yes
ENSG00000105967.14	ENSG00000105967.14	TFEC	chr7:115935147-116159896	Ctrl	siHIF1A	OK	18.1807	26.0558	0.519196	1.81385	5e-05	0.000604383	yes
ENSG00000105971.13	ENSG00000105971.13	CAV2	chr7:116209233-116508541	Ctrl	siHIF1A	OK	113.609	67.8676	-0.74328	-1.87497	5e-05	0.000604383	yes
ENSG00000105974.10	ENSG00000105974.10	CAV1	chr7:116524784-116561184	Ctrl	siHIF1A	OK	334.056	466.21	0.480889	1.64006	5e-05	0.000604383	yes
ENSG00000105976.13	ENSG00000105976.13	MET	chr7:116672389-116798386	Ctrl	siHIF1A	OK	30.2349	20.4675	-0.562881	-1.64286	5e-05	0.000604383	yes
ENSG00000105996.6	ENSG00000105996.6	HOXA2	chr7:27100353-27102811	Ctrl	siHIF1A	OK	1.98652	1.17747	-0.75455	-1.68557	5e-05	0.000604383	yes
ENSG00000106003.11	ENSG00000106003.11	LFNG	chr7:2512528-2529177	Ctrl	siHIF1A	OK	10.5145	4.8743	-1.10912	-3.37533	5e-05	0.000604383	yes
ENSG00000106268.14	ENSG00000106268.14	NUDT1	chr7:2242221-2251146	Ctrl	siHIF1A	OK	7.83857	4.96728	-0.658135	-1.62273	5e-05	0.000604383	yes
ENSG00000106404.12	ENSG00000106404.12	CLDN15	chr7:101232091-101238820	Ctrl	siHIF1A	OK	5.29661	8.6295	0.704208	2.03992	5e-05	0.000604383	yes
ENSG00000106460.17	ENSG00000106460.17	TMEM106B	chr7:12211240-12243367	Ctrl	siHIF1A	OK	17.9143	11.3828	-0.654257	-1.84451	5e-05	0.000604383	yes
ENSG00000106477.17	ENSG00000106477.17	CEP41	chr7:130393770-130442433	Ctrl	siHIF1A	OK	6.54532	10.2388	0.645508	1.551	5e-05	0.000604383	yes
ENSG00000106635.6	ENSG00000106635.6	BCL7B	chr7:73536355-73558002	Ctrl	siHIF1A	OK	9.70634	19.8522	1.0323	3.35366	5e-05	0.000604383	yes
ENSG00000106665.14	ENSG00000106665.14	CLIP2	chr7:74289474-74405943	Ctrl	siHIF1A	OK	9.15534	13.9033	0.602744	1.66503	5e-05	0.000604383	yes
ENSG00000106683.13	ENSG00000106683.13	LIMK1	chr7:74082932-74122525	Ctrl	siHIF1A	OK	27.7335	20.3476	-0.446771	-1.71494	5e-05	0.000604383	yes
ENSG00000106688.10	ENSG00000106688.10	SLC1A1	chr9:4490443-4666674	Ctrl	siHIF1A	OK	7.30146	4.3584	-0.744384	-2.23175	5e-05	0.000604383	yes
ENSG00000106772.16	ENSG00000106772.16	PRUNE2	chr9:76611375-76906087	Ctrl	siHIF1A	OK	11.2849	5.6437	-0.99968	-1.87789	5e-05	0.000604383	yes
ENSG00000106852.14	ENSG00000106852.14	LHX6	chr9:122202576-122229626	Ctrl	siHIF1A	OK	1.15031	5.57694	2.27745	3.75904	5e-05	0.000604383	yes
ENSG00000107201.8	ENSG00000107201.8	DDX58	chr9:32455704-32526324	Ctrl	siHIF1A	OK	14.4077	31.6374	1.13479	4.53383	5e-05	0.000604383	yes
ENSG00000107438.7	ENSG00000107438.7	PDLIM1	chr10:95237571-95291024	Ctrl	siHIF1A	OK	50.8257	38.8473	-0.387742	-1.50571	5e-05	0.000604383	yes
ENSG00000107443.14	ENSG00000107443.14	CCNJ	chr10:95711778-96090238	Ctrl	siHIF1A	OK	22.1204	12.1043	-0.86986	-2.2521	5e-05	0.000604383	yes
ENSG00000107485.14	ENSG00000107485.14	GATA3	chr10:8053603-8075198	Ctrl	siHIF1A	OK	1.75722	1.06501	-0.722433	-1.37488	5e-05	0.000604383	yes
ENSG00000107560.9	ENSG00000107560.9	RAB11FIP2	chr10:118004915-118210153	Ctrl	siHIF1A	OK	6.40104	3.22155	-0.990551	-2.15127	5e-05	0.000604383	yes
ENSG00000107679.13	ENSG00000107679.13	PLEKHA1	chr10:122374695-122442602	Ctrl	siHIF1A	OK	32.1626	23.2934	-0.465463	-1.56314	5e-05	0.000604383	yes
ENSG00000107731.11	ENSG00000107731.11	UNC5B	chr10:71212569-71302864	Ctrl	siHIF1A	OK	2.75072	0.583172	-2.23782	-6.44616	5e-05	0.000604383	yes
ENSG00000107796.11	ENSG00000107796.11	ACTA2	chr10:88879733-89015785	Ctrl	siHIF1A	OK	6.32112	13.4517	1.08954	2.3845	5e-05	0.000604383	yes
ENSG00000107863.15	ENSG00000107863.15	ARHGAP21	chr10:24583608-24723668	Ctrl	siHIF1A	OK	18.3259	33.0701	0.851643	1.67263	5e-05	0.000604383	yes
ENSG00000107960.9	ENSG00000107960.9	OBFC1	chr10:103882541-103918205	Ctrl	siHIF1A	OK	14.3199	8.76632	-0.707982	-2.50518	5e-05	0.000604383	yes
ENSG00000108100.16	ENSG00000108100.16	CCNY	chr10:35247024-35572669	Ctrl	siHIF1A	OK	82.6862	46.2665	-0.83768	-2.49981	5e-05	0.000604383	yes
ENSG00000108175.15	ENSG00000108175.15	ZMIZ1	chr10:79069034-79316528	Ctrl	siHIF1A	OK	8.47865	5.11567	-0.728913	-1.63547	5e-05	0.000604383	yes
ENSG00000108179.12	ENSG00000108179.12	PPIF	chr10:79347468-79355337	Ctrl	siHIF1A	OK	18.3103	11.4331	-0.679432	-2.18621	5e-05	0.000604383	yes
ENSG00000108448.19	ENSG00000108448.19	TRIM16L	chr17:18697997-18736118	Ctrl	siHIF1A	OK	19.5192	7.03565	-1.47214	-4.04099	5e-05	0.000604383	yes
ENSG00000108602.16	ENSG00000108602.16	ALDH3A1	chr17:19737681-19748943	Ctrl	siHIF1A	OK	0.248861	0.59997	1.26955	0.600992	5e-05	0.000604383	yes
ENSG00000108639.6	ENSG00000108639.6	SYNGR2	chr17:78168557-78173527	Ctrl	siHIF1A	OK	76.716	105.333	0.457355	1.79206	5e-05	0.000604383	yes
ENSG00000108679.11	ENSG00000108679.11	LGALS3BP	chr17:78971237-78980109	Ctrl	siHIF1A	OK	8.14308	11.6534	0.51711	1.61732	5e-05	0.000604383	yes
ENSG00000108691.8	ENSG00000108691.8	CCL2	chr17:34255217-34257203	Ctrl	siHIF1A	OK	455.882	230.253	-0.985438	-3.92252	5e-05	0.000604383	yes
ENSG00000108771.11	ENSG00000108771.11	DHX58	chr17:42101403-42112733	Ctrl	siHIF1A	OK	4.36028	10.341	1.24588	3.26532	5e-05	0.000604383	yes
ENSG00000108797.10	ENSG00000108797.10	CNTNAP1	chr17:42678888-42699814	Ctrl	siHIF1A	OK	15.9337	9.6221	-0.72766	-2.061	5e-05	0.000604383	yes
ENSG00000108828.14	ENSG00000108828.14	VAT1	chr17:43014604-43025123	Ctrl	siHIF1A	OK	138.184	199.132	0.527137	1.9315	5e-05	0.000604383	yes
ENSG00000108861.7	ENSG00000108861.7	DUSP3	chr17:43766120-43778988	Ctrl	siHIF1A	OK	31.6455	50.2523	0.667187	2.42265	5e-05	0.000604383	yes
ENSG00000108960.6	ENSG00000108960.6	MMD	chr17:55392612-55421992	Ctrl	siHIF1A	OK	9.32831	3.71552	-1.32805	-4.05288	5e-05	0.000604383	yes
ENSG00000109193.9	ENSG00000109193.9	SULT1E1	chr4:69791871-69860152	Ctrl	siHIF1A	OK	11.7896	6.86638	-0.779888	-2.36073	5e-05	0.000604383	yes
ENSG00000109270.11	ENSG00000109270.11	LAMTOR3	chr4:99878335-99894490	Ctrl	siHIF1A	OK	30.72	19.312	-0.669678	-2.18314	5e-05	0.000604383	yes
ENSG00000109667.10	ENSG00000109667.10	SLC2A9	chr4:9771152-10054936	Ctrl	siHIF1A	OK	1.50082	0.36448	-2.04184	-1.67988	5e-05	0.000604383	yes
ENSG00000109944.9	ENSG00000109944.9	C11orf63	chr11:122882527-122959798	Ctrl	siHIF1A	OK	2.04528	1.09587	-0.900226	-2.12491	5e-05	0.000604383	yes
ENSG00000110002.14	ENSG00000110002.14	VWA5A	chr11:124115361-124147721	Ctrl	siHIF1A	OK	7.18247	4.54352	-0.660669	-1.97747	5e-05	0.000604383	yes
ENSG00000110031.11	ENSG00000110031.11	LPXN	chr11:58526870-58578220	Ctrl	siHIF1A	OK	6.54568	4.46269	-0.552631	-1.66629	5e-05	0.000604383	yes
ENSG00000110080.17	ENSG00000110080.17	ST3GAL4	chr11:126355639-127006058	Ctrl	siHIF1A	OK	18.6659	13.774	-0.438456	-1.54802	5e-05	0.000604383	yes
ENSG00000110092.3	ENSG00000110092.3	CCND1	chr11:69641086-69675416	Ctrl	siHIF1A	OK	166.945	75.4693	-1.14541	-3.17492	5e-05	0.000604383	yes
ENSG00000110172.10	ENSG00000110172.10	CHORDC1	chr11:90201159-90226538	Ctrl	siHIF1A	OK	25.068	17.0574	-0.555451	-1.78309	5e-05	0.000604383	yes
ENSG00000110318.12	ENSG00000110318.12	KIAA1377	chr11:101890673-102001058	Ctrl	siHIF1A	OK	1.46621	0.712133	-1.04187	-2.40228	5e-05	0.000604383	yes
ENSG00000110422.10	ENSG00000110422.10	HIPK3	chr11:33256671-33357023	Ctrl	siHIF1A	OK	23.3427	15.9185	-0.552266	-1.96498	5e-05	0.000604383	yes
ENSG00000110455.12	ENSG00000110455.12	ACCS	chr11:44065924-44084222	Ctrl	siHIF1A	OK	2.0998	4.00144	0.930263	1.72227	5e-05	0.000604383	yes
ENSG00000110660.13	ENSG00000110660.13	SLC35F2	chr11:107790990-107928293	Ctrl	siHIF1A	OK	27.2481	19.7211	-0.466418	-1.69706	5e-05	0.000604383	yes
ENSG00000110848.7	ENSG00000110848.7	CD69	chr12:9752485-9760901	Ctrl	siHIF1A	OK	1.1467	0.130109	-3.13969	-2.08088	5e-05	0.000604383	yes
ENSG00000110881.10	ENSG00000110881.10	ASIC1	chr12:50057547-50083611	Ctrl	siHIF1A	OK	0.481863	0.129972	-1.89042	-0.817502	5e-05	0.000604383	yes
ENSG00000110917.6	ENSG00000110917.6	MLEC	chr12:120686868-120701864	Ctrl	siHIF1A	OK	19.5178	31.0259	0.668686	1.78325	5e-05	0.000604383	yes
ENSG00000110987.7	ENSG00000110987.7	BCL7A	chr12:122007433-122062044	Ctrl	siHIF1A	OK	2.41528	3.74868	0.634192	1.85718	5e-05	0.000604383	yes
ENSG00000111057.9	ENSG00000111057.9	KRT18	chr12:52897186-52952901	Ctrl	siHIF1A	OK	58.3374	81.5179	0.482695	1.84506	5e-05	0.000604383	yes
ENSG00000111110.10	ENSG00000111110.10	PPM1H	chr12:62643981-62935037	Ctrl	siHIF1A	OK	2.04344	1.05672	-0.951399	-1.61436	5e-05	0.000604383	yes
ENSG00000111199.9	ENSG00000111199.9	TRPV4	chr12:109783084-109833436	Ctrl	siHIF1A	OK	4.34368	1.93509	-1.16652	-2.81198	5e-05	0.000604383	yes
ENSG00000111252.9	ENSG00000111252.9	SH2B3	chr12:111405947-111451623	Ctrl	siHIF1A	OK	64.9143	32.1253	-1.01483	-3.88609	5e-05	0.000604383	yes
ENSG00000111276.9	ENSG00000111276.9	CDKN1B	chr12:12715057-12722371	Ctrl	siHIF1A	OK	23.8892	14.8091	-0.689879	-2.6362	5e-05	0.000604383	yes
ENSG00000111331.11	ENSG00000111331.11	OAS3	chr12:112906776-113017751	Ctrl	siHIF1A	OK	10.2261	29.914	1.54856	1.93809	5e-05	0.000604383	yes
ENSG00000111335.11	ENSG00000111335.11	OAS2	chr12:112906776-113017751	Ctrl	siHIF1A	OK	15.1332	50.5068	1.73876	2.88636	5e-05	0.000604383	yes
ENSG00000111341.8	ENSG00000111341.8	MGP	chr12:14803571-14906586	Ctrl	siHIF1A	OK	79.263	236.52	1.57724	4.05153	5e-05	0.000604383	yes
ENSG00000111640.13	ENSG00000111640.13	GAPDH	chr12:6533926-6538374	Ctrl	siHIF1A	OK	1814.08	1099.55	-0.722323	-1.87122	5e-05	0.000604383	yes
ENSG00000111647.11	ENSG00000111647.11	UHRF1BP1L	chr12:100028454-100142848	Ctrl	siHIF1A	OK	7.54229	4.74048	-0.669968	-1.64905	5e-05	0.000604383	yes
ENSG00000111669.13	ENSG00000111669.13	TPI1	chr12:6867118-6923698	Ctrl	siHIF1A	OK	524.236	214.246	-1.29095	-4.61608	5e-05	0.000604383	yes
ENSG00000111674.7	ENSG00000111674.7	ENO2	chr12:6867118-6923698	Ctrl	siHIF1A	OK	33.0584	7.71044	-2.10013	-1.69459	5e-05	0.000604383	yes
ENSG00000111676.13	ENSG00000111676.13	ATN1	chr12:6924462-6942321	Ctrl	siHIF1A	OK	10.1881	3.54967	-1.52113	-2.86947	5e-05	0.000604383	yes
ENSG00000111678.9	ENSG00000111678.9	C12orf57	chr12:6942977-6946003	Ctrl	siHIF1A	OK	89.3915	35.7176	-1.3235	-4.58797	5e-05	0.000604383	yes
ENSG00000111716.11	ENSG00000111716.11	LDHB	chr12:21635341-21775581	Ctrl	siHIF1A	OK	356.451	253.987	-0.488951	-1.91373	5e-05	0.000604383	yes
ENSG00000111801.14	ENSG00000111801.14	BTN3A3	chr6:26440471-26453415	Ctrl	siHIF1A	OK	7.01317	14.84	1.08135	2.80481	5e-05	0.000604383	yes
ENSG00000111906.16	ENSG00000111906.16	HDDC2	chr6:125119048-125302078	Ctrl	siHIF1A	OK	10.116	4.39718	-1.20199	-3.12181	5e-05	0.000604383	yes
ENSG00000111911.6	ENSG00000111911.6	HINT3	chr6:125956780-125980244	Ctrl	siHIF1A	OK	10.5405	6.35411	-0.730187	-2.68057	5e-05	0.000604383	yes
ENSG00000112183.13	ENSG00000112183.13	RBM24	chr6:17281345-17293875	Ctrl	siHIF1A	OK	3.65702	0.873621	-2.06559	-3.96272	5e-05	0.000604383	yes
ENSG00000112186.10	ENSG00000112186.10	CAP2	chr6:17393215-17557792	Ctrl	siHIF1A	OK	5.56037	3.96029	-0.489576	-1.62718	5e-05	0.000604383	yes
ENSG00000112290.11	ENSG00000112290.11	WASF1	chr6:110099818-110180004	Ctrl	siHIF1A	OK	7.06852	4.9449	-0.515465	-1.56789	5e-05	0.000604383	yes
ENSG00000112297.13	ENSG00000112297.13	AIM1	chr6:106511854-106570451	Ctrl	siHIF1A	OK	5.50737	8.71031	0.66136	2.26737	5e-05	0.000604383	yes
ENSG00000112343.10	ENSG00000112343.10	TRIM38	chr6:25962801-26001775	Ctrl	siHIF1A	OK	3.88781	5.74727	0.563917	2.18984	5e-05	0.000604383	yes
ENSG00000112378.11	ENSG00000112378.11	PERP	chr6:138088504-138107511	Ctrl	siHIF1A	OK	12.2601	29.3504	1.25941	5.08419	5e-05	0.000604383	yes
ENSG00000112379.8	ENSG00000112379.8	KIAA1244	chr6:138161920-138344663	Ctrl	siHIF1A	OK	1.5557	0.916947	-0.762653	-2.69501	5e-05	0.000604383	yes
ENSG00000112419.13	ENSG00000112419.13	PHACTR2	chr6:143536844-143938471	Ctrl	siHIF1A	OK	22.4008	45.2598	1.01468	2.18814	5e-05	0.000604383	yes
ENSG00000112473.15	ENSG00000112473.15	SLC39A7	chr6:33193587-33204439	Ctrl	siHIF1A	OK	29.2685	41.5363	0.505024	1.77806	5e-05	0.000604383	yes
ENSG00000112559.12	ENSG00000112559.12	MDFI	chr6:41636881-41654246	Ctrl	siHIF1A	OK	32.2931	11.8867	-1.44187	-4.97827	5e-05	0.000604383	yes
ENSG00000112562.17	ENSG00000112562.17	SMOC2	chr6:168441150-168673445	Ctrl	siHIF1A	OK	5.27641	9.74997	0.885842	2.92816	5e-05	0.000604383	yes
ENSG00000112576.11	ENSG00000112576.11	CCND3	chr6:41934932-42050357	Ctrl	siHIF1A	OK	42.1812	64.7686	0.618695	2.28585	5e-05	0.000604383	yes
ENSG00000112715.19	ENSG00000112715.19	VEGFA	chr6:43770183-43786487	Ctrl	siHIF1A	OK	40.083	14.0522	-1.51219	-3.75334	5e-05	0.000604383	yes
ENSG00000112742.8	ENSG00000112742.8	TTK	chr6:80003886-80042527	Ctrl	siHIF1A	OK	3.21263	1.93889	-0.728522	-1.28477	5e-05	0.000604383	yes
ENSG00000112893.8	ENSG00000112893.8	MAN2A1	chr5:109689365-109869625	Ctrl	siHIF1A	OK	47.7303	27.9511	-0.772001	-3.00689	5e-05	0.000604383	yes
ENSG00000112981.4	ENSG00000112981.4	NME5	chr5:138115171-138139443	Ctrl	siHIF1A	OK	0.631746	1.64388	1.37969	1.46977	5e-05	0.000604383	yes
ENSG00000113083.11	ENSG00000113083.11	LOX	chr5:121961960-122078285	Ctrl	siHIF1A	OK	34.0075	15.0214	-1.17883	-3.42761	5e-05	0.000604383	yes
ENSG00000113273.14	ENSG00000113273.14	ARSB	chr5:78777208-78986087	Ctrl	siHIF1A	OK	14.1564	6.9068	-1.03536	-3.66696	5e-05	0.000604383	yes
ENSG00000113369.7	ENSG00000113369.7	ARRDC3	chr5:91368723-91439085	Ctrl	siHIF1A	OK	93.5123	47.2636	-0.984427	-2.71579	5e-05	0.000604383	yes
ENSG00000113532.11	ENSG00000113532.11	ST8SIA4	chr5:100806934-100903266	Ctrl	siHIF1A	OK	7.79238	4.17881	-0.898971	-2.68195	5e-05	0.000604383	yes
ENSG00000113555.5	ENSG00000113555.5	PCDH12	chr5:141943584-141990291	Ctrl	siHIF1A	OK	33.4083	13.6918	-1.2869	-1.93682	5e-05	0.000604383	yes
ENSG00000113638.11	ENSG00000113638.11	TTC33	chr5:40714474-40755975	Ctrl	siHIF1A	OK	3.79538	6.40968	0.756008	2.44311	5e-05	0.000604383	yes
ENSG00000113657.11	ENSG00000113657.11	DPYSL3	chr5:147390810-147510056	Ctrl	siHIF1A	OK	55.1776	25.9047	-1.09087	-3.51626	5e-05	0.000604383	yes
ENSG00000113739.9	ENSG00000113739.9	STC2	chr5:173314712-173329503	Ctrl	siHIF1A	OK	37.7896	13.9101	-1.44185	-3.12309	5e-05	0.000604383	yes
ENSG00000113758.12	ENSG00000113758.12	DBN1	chr5:177456607-177474401	Ctrl	siHIF1A	OK	68.4802	103.047	0.589546	1.8656	5e-05	0.000604383	yes
ENSG00000114023.14	ENSG00000114023.14	FAM162A	chr3:122384175-122416051	Ctrl	siHIF1A	OK	21.1362	10.5371	-1.00423	-2.55677	5e-05	0.000604383	yes
ENSG00000114120.10	ENSG00000114120.10	SLC25A36	chr3:140941829-140979933	Ctrl	siHIF1A	OK	26.8068	19.044	-0.49326	-1.48869	5e-05	0.000604383	yes
ENSG00000114268.10	ENSG00000114268.10	PFKFB4	chr3:48517683-48563773	Ctrl	siHIF1A	OK	2.70193	1.03089	-1.3901	-2.16982	5e-05	0.000604383	yes
ENSG00000114315.3	ENSG00000114315.3	HES1	chr3:194136144-194138732	Ctrl	siHIF1A	OK	53.4248	36.7426	-0.540054	-2.15685	5e-05	0.000604383	yes
ENSG00000114353.15	ENSG00000114353.15	GNAI2	chr3:50226291-50259355	Ctrl	siHIF1A	OK	198.697	322.608	0.699212	2.5314	5e-05	0.000604383	yes
ENSG00000114450.8	ENSG00000114450.8	GNB4	chr3:179396088-179451590	Ctrl	siHIF1A	OK	31.1622	18.9738	-0.715787	-1.86282	5e-05	0.000604383	yes
ENSG00000114480.11	ENSG00000114480.11	GBE1	chr3:81489698-81762161	Ctrl	siHIF1A	OK	100.333	68.6223	-0.548048	-2.01655	5e-05	0.000604383	yes
ENSG00000114573.8	ENSG00000114573.8	ATP6V1A	chr3:113746871-113812056	Ctrl	siHIF1A	OK	44.1395	33.4544	-0.399877	-1.44649	5e-05	0.000604383	yes
ENSG00000114631.10	ENSG00000114631.10	PODXL2	chr3:127629180-127672809	Ctrl	siHIF1A	OK	0.946759	1.78871	0.917853	2.20024	5e-05	0.000604383	yes
ENSG00000114686.7	ENSG00000114686.7	MRPL3	chr3:131462211-131502983	Ctrl	siHIF1A	OK	26.238	16.7636	-0.646325	-2.26315	5e-05	0.000604383	yes
ENSG00000114698.13	ENSG00000114698.13	PLSCR4	chr3:146192338-146251179	Ctrl	siHIF1A	OK	116.55	68.1146	-0.774915	-2.66241	5e-05	0.000604383	yes
ENSG00000114933.14	ENSG00000114933.14	INO80D	chr2:205989584-206086564	Ctrl	siHIF1A	OK	4.42759	3.15274	-0.489913	-1.65753	5e-05	0.000604383	yes
ENSG00000114942.12	ENSG00000114942.12	EEF1B2	chr2:206114816-206162928	Ctrl	siHIF1A	OK	300.516	212.079	-0.502839	-1.68128	5e-05	0.000604383	yes
ENSG00000115008.5	ENSG00000115008.5	IL1A	chr2:112773914-112784590	Ctrl	siHIF1A	OK	7.43461	0.596603	-3.63941	-8.39185	5e-05	0.000604383	yes
ENSG00000115073.7	ENSG00000115073.7	ACTR1B	chr2:97655962-97664107	Ctrl	siHIF1A	OK	20.0681	29.1212	0.537164	1.95556	5e-05	0.000604383	yes
ENSG00000115107.18	ENSG00000115107.18	STEAP3	chr2:119223830-119265652	Ctrl	siHIF1A	OK	8.50223	4.68147	-0.86088	-3.01095	5e-05	0.000604383	yes
ENSG00000115267.5	ENSG00000115267.5	IFIH1	chr2:162267078-162318703	Ctrl	siHIF1A	OK	7.36427	17.2103	1.22466	3.64985	5e-05	0.000604383	yes
ENSG00000115457.8	ENSG00000115457.8	IGFBP2	chr2:216632827-216664436	Ctrl	siHIF1A	OK	4.07294	2.49878	-0.704845	-1.67048	5e-05	0.000604383	yes
ENSG00000115525.15	ENSG00000115525.15	ST3GAL5	chr2:85839143-85889014	Ctrl	siHIF1A	OK	22.0336	14.216	-0.63219	-1.8994	5e-05	0.000604383	yes
ENSG00000115526.9	ENSG00000115526.9	CHST10	chr2:100391859-100417656	Ctrl	siHIF1A	OK	6.08535	4.34275	-0.48673	-1.35647	5e-05	0.000604383	yes
ENSG00000115539.12	ENSG00000115539.12	PDCL3	chr2:100562689-100576735	Ctrl	siHIF1A	OK	7.20548	10.695	0.569764	1.81233	5e-05	0.000604383	yes
ENSG00000115556.12	ENSG00000115556.12	PLCD4	chr2:218607764-218637184	Ctrl	siHIF1A	OK	2.5598	0.875418	-1.54799	-1.91697	5e-05	0.000604383	yes
ENSG00000115652.13	ENSG00000115652.13	UXS1	chr2:106093302-106194339	Ctrl	siHIF1A	OK	17.2428	10.8636	-0.666488	-2.17999	5e-05	0.000604383	yes
ENSG00000115750.15	ENSG00000115750.15	TAF1B	chr2:9843353-9934416	Ctrl	siHIF1A	OK	11.1862	6.86206	-0.705013	-1.64806	5e-05	0.000604383	yes
ENSG00000115762.15	ENSG00000115762.15	PLEKHB2	chr2:131104846-131353709	Ctrl	siHIF1A	OK	37.8819	51.4256	0.440978	1.63169	5e-05	0.000604383	yes
ENSG00000115866.9	ENSG00000115866.9	DARS	chr2:135906676-136022593	Ctrl	siHIF1A	OK	33.9278	25.6709	-0.402331	-1.47349	5e-05	0.000604383	yes
ENSG00000115884.9	ENSG00000115884.9	SDC1	chr2:20200796-20225433	Ctrl	siHIF1A	OK	1.1142	2.77338	1.31564	2.22988	5e-05	0.000604383	yes
ENSG00000115993.10	ENSG00000115993.10	TRAK2	chr2:201377206-201480846	Ctrl	siHIF1A	OK	17.2492	8.39552	-1.03884	-3.09551	5e-05	0.000604383	yes
ENSG00000116157.5	ENSG00000116157.5	GPX7	chr1:52602371-52609051	Ctrl	siHIF1A	OK	9.69819	6.18128	-0.649809	-2.05075	5e-05	0.000604383	yes
ENSG00000116199.10	ENSG00000116199.10	FAM20B	chr1:179025803-179076562	Ctrl	siHIF1A	OK	11.1578	5.71041	-0.966383	-3.18457	5e-05	0.000604383	yes
ENSG00000116285.11	ENSG00000116285.11	ERRFI1	chr1:8004403-8026308	Ctrl	siHIF1A	OK	39.3284	18.7235	-1.07072	-3.89562	5e-05	0.000604383	yes
ENSG00000116288.11	ENSG00000116288.11	PARK7	chr1:7954290-7985505	Ctrl	siHIF1A	OK	101.812	66.6742	-0.610709	-2.4307	5e-05	0.000604383	yes
ENSG00000116478.10	ENSG00000116478.10	HDAC1	chr1:32292085-32333635	Ctrl	siHIF1A	OK	53.1759	83.2537	0.646742	2.24196	5e-05	0.000604383	yes
ENSG00000116711.9	ENSG00000116711.9	PLA2G4A	chr1:186828952-186988981	Ctrl	siHIF1A	OK	8.69931	3.95815	-1.13607	-4.01422	5e-05	0.000604383	yes
ENSG00000117000.8	ENSG00000117000.8	RLF	chr1:40161372-40240921	Ctrl	siHIF1A	OK	9.34373	5.66248	-0.722565	-2.89245	5e-05	0.000604383	yes
ENSG00000117222.12	ENSG00000117222.12	RBBP5	chr1:205086141-205122015	Ctrl	siHIF1A	OK	4.57444	6.90549	0.594149	2.00265	5e-05	0.000604383	yes
ENSG00000117228.9	ENSG00000117228.9	GBP1	chr1:89052318-89065360	Ctrl	siHIF1A	OK	9.43225	14.5085	0.621226	1.78182	5e-05	0.000604383	yes
ENSG00000117298.13	ENSG00000117298.13	ECE1	chr1:21217246-21345504	Ctrl	siHIF1A	OK	122.299	291.097	1.25109	3.59219	5e-05	0.000604383	yes
ENSG00000117308.13	ENSG00000117308.13	GALE	chr1:23795598-23800804	Ctrl	siHIF1A	OK	35.2185	25.267	-0.479079	-1.71037	5e-05	0.000604383	yes
ENSG00000117394.18	ENSG00000117394.18	SLC2A1	chr1:42925374-42983358	Ctrl	siHIF1A	OK	69.3195	35.3093	-0.973214	-2.96673	5e-05	0.000604383	yes
ENSG00000117399.12	ENSG00000117399.12	CDC20	chr1:43358954-43363203	Ctrl	siHIF1A	OK	16.1403	7.59029	-1.08844	-3.56953	5e-05	0.000604383	yes
ENSG00000117461.13	ENSG00000117461.13	PIK3R3	chr1:46040139-46185958	Ctrl	siHIF1A	OK	7.52095	3.18184	-1.24105	-3.87257	5e-05	0.000604383	yes
ENSG00000117479.11	ENSG00000117479.11	SLC19A2	chr1:169463908-169486003	Ctrl	siHIF1A	OK	4.19829	2.59355	-0.69487	-2.17429	5e-05	0.000604383	yes
ENSG00000117500.11	ENSG00000117500.11	TMED5	chr1:93149741-93369498	Ctrl	siHIF1A	OK	36.8354	21.0416	-0.80785	-1.8332	5e-05	0.000604383	yes
ENSG00000117595.9	ENSG00000117595.9	IRF6	chr1:209785622-209806175	Ctrl	siHIF1A	OK	12.5249	1.09397	-3.51715	-7.84851	5e-05	0.000604383	yes
ENSG00000117597.16	ENSG00000117597.16	DIEXF	chr1:209828006-209857565	Ctrl	siHIF1A	OK	6.38116	4.32075	-0.562536	-1.94681	5e-05	0.000604383	yes
ENSG00000117643.13	ENSG00000117643.13	MAN1C1	chr1:25617467-25786207	Ctrl	siHIF1A	OK	1.04718	2.82586	1.43218	3.1663	5e-05	0.000604383	yes
ENSG00000117650.11	ENSG00000117650.11	NEK2	chr1:211658656-211675630	Ctrl	siHIF1A	OK	2.74047	1.32107	-1.05272	-2.43257	5e-05	0.000604383	yes
ENSG00000117713.16	ENSG00000117713.16	ARID1A	chr1:26696032-26782104	Ctrl	siHIF1A	OK	5.91317	3.99178	-0.566897	-1.55412	5e-05	0.000604383	yes
ENSG00000117751.16	ENSG00000117751.16	PPP1R8	chr1:27830777-27851676	Ctrl	siHIF1A	OK	11.0567	16.3733	0.566423	1.97017	5e-05	0.000604383	yes
ENSG00000117899.9	ENSG00000117899.9	MESDC2	chr15:80779342-80989878	Ctrl	siHIF1A	OK	7.28809	16.012	1.13554	4.05964	5e-05	0.000604383	yes
ENSG00000118193.10	ENSG00000118193.10	KIF14	chr1:200551496-200620734	Ctrl	siHIF1A	OK	1.83312	0.872659	-1.07081	-3.44574	5e-05	0.000604383	yes
ENSG00000118217.5	ENSG00000118217.5	ATF6	chr1:161766293-161964070	Ctrl	siHIF1A	OK	18.2513	28.5853	0.647272	2.46418	5e-05	0.000604383	yes
ENSG00000118402.5	ENSG00000118402.5	ELOVL4	chr6:79914811-79947580	Ctrl	siHIF1A	OK	1.42677	0.751823	-0.924292	-2.09061	5e-05	0.000604383	yes
ENSG00000118418.13	ENSG00000118418.13	HMGN3	chr6:79201244-79236797	Ctrl	siHIF1A	OK	41.8348	30.4265	-0.459377	-1.68397	5e-05	0.000604383	yes
ENSG00000118482.10	ENSG00000118482.10	PHF3	chr6:63635819-65707225	Ctrl	siHIF1A	OK	11.5515	16.568	0.520322	1.77154	5e-05	0.000604383	yes
ENSG00000118503.13	ENSG00000118503.13	TNFAIP3	chr6:137823672-137883312	Ctrl	siHIF1A	OK	6.18125	3.07051	-1.00942	-1.93276	5e-05	0.000604383	yes
ENSG00000118508.4	ENSG00000118508.4	RAB32	chr6:146543692-146554965	Ctrl	siHIF1A	OK	61.4896	46.1517	-0.413958	-1.67471	5e-05	0.000604383	yes
ENSG00000118515.10	ENSG00000118515.10	SGK1	chr6:134169245-134318112	Ctrl	siHIF1A	OK	51.6701	76.8073	0.571913	2.07626	5e-05	0.000604383	yes
ENSG00000118596.10	ENSG00000118596.10	SLC16A7	chr12:59596066-59789855	Ctrl	siHIF1A	OK	4.39094	1.6312	-1.42859	-1.80916	5e-05	0.000604383	yes
ENSG00000118777.9	ENSG00000118777.9	ABCG2	chr4:88090263-88231322	Ctrl	siHIF1A	OK	1.40028	4.3107	1.62221	1.85773	5e-05	0.000604383	yes
ENSG00000118816.8	ENSG00000118816.8	CCNI	chr4:77047157-77076005	Ctrl	siHIF1A	OK	88.581	59.5809	-0.572148	-2.11129	5e-05	0.000604383	yes
ENSG00000118946.10	ENSG00000118946.10	PCDH17	chr13:57631809-57729311	Ctrl	siHIF1A	OK	1.27496	0.540391	-1.23837	-2.51901	5e-05	0.000604383	yes
ENSG00000119280.15	ENSG00000119280.15	C1orf198	chr1:230837118-230869589	Ctrl	siHIF1A	OK	9.58732	7.12777	-0.427677	-1.49648	5e-05	0.000604383	yes
ENSG00000119392.13	ENSG00000119392.13	GLE1	chr9:128504699-128552410	Ctrl	siHIF1A	OK	4.46675	7.58323	0.763586	2.76511	5e-05	0.000604383	yes
ENSG00000119421.6	ENSG00000119421.6	NDUFA8	chr9:122144057-122159819	Ctrl	siHIF1A	OK	26.6508	45.5978	0.774787	2.94046	5e-05	0.000604383	yes
ENSG00000119669.4	ENSG00000119669.4	IRF2BPL	chr14:77024542-77031572	Ctrl	siHIF1A	OK	6.59046	4.39723	-0.583784	-1.90996	5e-05	0.000604383	yes
ENSG00000119900.7	ENSG00000119900.7	OGFRL1	chr6:71221456-71420769	Ctrl	siHIF1A	OK	6.99838	11.8017	0.753897	1.92749	5e-05	0.000604383	yes
ENSG00000119917.12	ENSG00000119917.12	IFIT3	chr10:89213568-89414557	Ctrl	siHIF1A	OK	4.65633	21.4156	2.2014	3.15987	5e-05	0.000604383	yes
ENSG00000119922.8	ENSG00000119922.8	IFIT2	chr10:89213568-89414557	Ctrl	siHIF1A	OK	1.02266	4.78219	2.22535	1.9636	5e-05	0.000604383	yes
ENSG00000119927.12	ENSG00000119927.12	GPAM	chr10:112149863-112215377	Ctrl	siHIF1A	OK	2.54577	3.74472	0.556756	1.5369	5e-05	0.000604383	yes
ENSG00000119938.8	ENSG00000119938.8	PPP1R3C	chr10:91628441-91633054	Ctrl	siHIF1A	OK	4.10806	2.02813	-1.01831	-2.9888	5e-05	0.000604383	yes
ENSG00000119950.19	ENSG00000119950.19	MXI1	chr10:110207604-110287365	Ctrl	siHIF1A	OK	8.6993	4.64325	-0.905763	-3.06768	5e-05	0.000604383	yes
ENSG00000120156.19	ENSG00000120156.19	TEK	chr9:27109140-27230175	Ctrl	siHIF1A	OK	29.5845	47.0786	0.670231	2.75024	5e-05	0.000604383	yes
ENSG00000120337.8	ENSG00000120337.8	TNFSF18	chr1:172775904-173064015	Ctrl	siHIF1A	OK	9.65137	39.8098	2.04432	7.60869	5e-05	0.000604383	yes
ENSG00000120658.11	ENSG00000120658.11	ENOX1	chr13:43213517-43786908	Ctrl	siHIF1A	OK	1.1214	0.241648	-2.21433	-1.87476	5e-05	0.000604383	yes
ENSG00000120708.15	ENSG00000120708.15	TGFBI	chr5:136028894-136063818	Ctrl	siHIF1A	OK	9.80781	2.65297	-1.88632	-4.69846	5e-05	0.000604383	yes
ENSG00000120820.11	ENSG00000120820.11	GLT8D2	chr12:103988983-104064183	Ctrl	siHIF1A	OK	0.680811	1.30067	0.933929	1.34343	5e-05	0.000604383	yes
ENSG00000120889.11	ENSG00000120889.11	TNFRSF10B	chr8:22687658-23083619	Ctrl	siHIF1A	OK	157.748	100.673	-0.647948	-1.96628	5e-05	0.000604383	yes
ENSG00000120992.16	ENSG00000120992.16	LYPLA1	chr8:54046366-54102017	Ctrl	siHIF1A	OK	97.1794	54.0173	-0.847228	-2.81257	5e-05	0.000604383	yes
ENSG00000121067.16	ENSG00000121067.16	SPOP	chr17:49598883-49678234	Ctrl	siHIF1A	OK	23.3129	31.8799	0.451519	1.43196	5e-05	0.000604383	yes
ENSG00000121653.10	ENSG00000121653.10	MAPK8IP1	chr11:45885650-45906465	Ctrl	siHIF1A	OK	2.07526	0.985605	-1.07421	-1.8345	5e-05	0.000604383	yes
ENSG00000121753.11	ENSG00000121753.11	BAI2	chr1:31727116-31764893	Ctrl	siHIF1A	OK	0.811257	0.263726	-1.62112	-1.31058	5e-05	0.000604383	yes
ENSG00000121966.6	ENSG00000121966.6	CXCR4	chr2:136114348-136118165	Ctrl	siHIF1A	OK	101.461	78.9845	-0.361283	-1.49832	5e-05	0.000604383	yes
ENSG00000122026.9	ENSG00000122026.9	RPL21	chr13:27251308-27256691	Ctrl	siHIF1A	OK	730.379	543.292	-0.426917	-1.65207	5e-05	0.000604383	yes
ENSG00000122406.11	ENSG00000122406.11	RPL5	chr1:92832024-92961522	Ctrl	siHIF1A	OK	634.341	438.92	-0.531302	-2.01574	5e-05	0.000604383	yes
ENSG00000122694.14	ENSG00000122694.14	GLIPR2	chr9:36136535-36163913	Ctrl	siHIF1A	OK	8.69121	5.168	-0.74995	-2.45457	5e-05	0.000604383	yes
ENSG00000122778.8	ENSG00000122778.8	KIAA1549	chr7:138706294-138981318	Ctrl	siHIF1A	OK	3.28905	2.01797	-0.70477	-2.39332	5e-05	0.000604383	yes
ENSG00000122862.4	ENSG00000122862.4	SRGN	chr10:69088105-69104811	Ctrl	siHIF1A	OK	375.691	615.292	0.711725	2.66658	5e-05	0.000604383	yes
ENSG00000122884.11	ENSG00000122884.11	P4HA1	chr10:73007216-73096974	Ctrl	siHIF1A	OK	65.4404	34.8694	-0.908219	-3.64247	5e-05	0.000604383	yes
ENSG00000123131.11	ENSG00000123131.11	PRDX4	chrX:23664261-23686399	Ctrl	siHIF1A	OK	41.6666	84.0367	1.01213	3.93944	5e-05	0.000604383	yes
ENSG00000123159.14	ENSG00000123159.14	GIPC1	chr19:14477759-14496149	Ctrl	siHIF1A	OK	61.0457	34.4912	-0.823663	-3.13425	5e-05	0.000604383	yes
ENSG00000123358.18	ENSG00000123358.18	NR4A1	chr12:52022831-52059507	Ctrl	siHIF1A	OK	1.78448	0.815966	-1.12892	-1.20183	5e-05	0.000604383	yes
ENSG00000123609.9	ENSG00000123609.9	NMI	chr2:151270464-151290057	Ctrl	siHIF1A	OK	8.72655	12.4509	0.512765	1.67015	5e-05	0.000604383	yes
ENSG00000123892.10	ENSG00000123892.10	RAB38	chr11:88098590-88175467	Ctrl	siHIF1A	OK	2.39757	1.13727	-1.076	-2.27447	5e-05	0.000604383	yes
ENSG00000124006.13	ENSG00000124006.13	OBSL1	chr2:219550728-219575713	Ctrl	siHIF1A	OK	7.27861	4.90643	-0.568989	-1.62055	5e-05	0.000604383	yes
ENSG00000124019.9	ENSG00000124019.9	FAM124B	chr2:224378697-224402085	Ctrl	siHIF1A	OK	125.964	59.7803	-1.07527	-4.33622	5e-05	0.000604383	yes
ENSG00000124098.9	ENSG00000124098.9	FAM210B	chr20:56358914-56368663	Ctrl	siHIF1A	OK	26.0552	42.9128	0.719836	2.61175	5e-05	0.000604383	yes
ENSG00000124145.6	ENSG00000124145.6	SDC4	chr20:45325287-45348424	Ctrl	siHIF1A	OK	6.83167	16.2148	1.247	4.55648	5e-05	0.000604383	yes
ENSG00000124191.16	ENSG00000124191.16	TOX2	chr20:43914863-44069616	Ctrl	siHIF1A	OK	2.95843	1.63459	-0.855904	-1.89286	5e-05	0.000604383	yes
ENSG00000124201.13	ENSG00000124201.13	ZNFX1	chr20:49219294-49295738	Ctrl	siHIF1A	OK	15.3902	24.3244	0.660392	1.93669	5e-05	0.000604383	yes
ENSG00000124212.5	ENSG00000124212.5	PTGIS	chr20:49503873-49568146	Ctrl	siHIF1A	OK	20.0596	6.11248	-1.71446	-5.09375	5e-05	0.000604383	yes
ENSG00000124383.7	ENSG00000124383.7	MPHOSPH10	chr2:71130313-71150101	Ctrl	siHIF1A	OK	5.97005	8.95565	0.585054	1.65612	5e-05	0.000604383	yes
ENSG00000124523.13	ENSG00000124523.13	SIRT5	chr6:13574528-13615158	Ctrl	siHIF1A	OK	3.26121	6.43276	0.980033	2.62068	5e-05	0.000604383	yes
ENSG00000124570.16	ENSG00000124570.16	SERPINB6	chr6:2948158-2972165	Ctrl	siHIF1A	OK	43.3284	59.217	0.450698	1.78379	5e-05	0.000604383	yes
ENSG00000124575.6	ENSG00000124575.6	HIST1H1D	chr6:26234267-26234933	Ctrl	siHIF1A	OK	8.53882	3.70814	-1.20334	-2.82844	5e-05	0.000604383	yes
ENSG00000124593.13	ENSG00000124593.13	PRICKLE4	chr6:41770175-41895361	Ctrl	siHIF1A	OK	7.40329	16.0549	1.11677	2.11759	5e-05	0.000604383	yes
ENSG00000124608.4	ENSG00000124608.4	AARS2	chr6:44270465-44378957	Ctrl	siHIF1A	OK	4.38552	6.3088	0.524618	1.69837	5e-05	0.000604383	yes
ENSG00000124641.13	ENSG00000124641.13	MED20	chr6:41905353-41921139	Ctrl	siHIF1A	OK	10.8901	16.1396	0.56759	1.90969	5e-05	0.000604383	yes
ENSG00000124688.12	ENSG00000124688.12	MAD2L1BP	chr6:43629539-43640952	Ctrl	siHIF1A	OK	18.8387	12.676	-0.571597	-1.91666	5e-05	0.000604383	yes
ENSG00000124702.16	ENSG00000124702.16	KLHDC3	chr6:43014102-43021298	Ctrl	siHIF1A	OK	29.3573	42.6895	0.540162	2.18967	5e-05	0.000604383	yes
ENSG00000124721.16	ENSG00000124721.16	DNAH8	chr6:38715340-39030529	Ctrl	siHIF1A	OK	0.893981	0.120394	-2.89248	-1.34939	5e-05	0.000604383	yes
ENSG00000124767.6	ENSG00000124767.6	GLO1	chr6:38675924-38703141	Ctrl	siHIF1A	OK	80.8932	58.2378	-0.474062	-1.9654	5e-05	0.000604383	yes
ENSG00000124785.7	ENSG00000124785.7	NRN1	chr6:5997998-6007605	Ctrl	siHIF1A	OK	0.985455	0.474751	-1.05362	-1.52871	5e-05	0.000604383	yes
ENSG00000124789.10	ENSG00000124789.10	NUP153	chr6:17615034-17707344	Ctrl	siHIF1A	OK	14.422	9.49779	-0.602611	-2.36933	5e-05	0.000604383	yes
ENSG00000124875.8	ENSG00000124875.8	CXCL6	chr4:73836496-73849064	Ctrl	siHIF1A	OK	2.10837	0.919876	-1.19661	-1.99731	5e-05	0.000604383	yes
ENSG00000125122.13	ENSG00000125122.13	LRRC29	chr16:67207138-67227048	Ctrl	siHIF1A	OK	1.01182	1.91528	0.920609	1.51997	5e-05	0.000604383	yes
ENSG00000125148.6	ENSG00000125148.6	MT2A	chr16:56608198-56609497	Ctrl	siHIF1A	OK	426.291	942.601	1.14481	4.49209	5e-05	0.000604383	yes
ENSG00000125257.12	ENSG00000125257.12	ABCC4	chr13:95019828-95301446	Ctrl	siHIF1A	OK	15.366	9.51928	-0.690817	-2.1151	5e-05	0.000604383	yes
ENSG00000125538.10	ENSG00000125538.10	IL1B	chr2:112829750-112836903	Ctrl	siHIF1A	OK	0.728382	0.105833	-2.7829	-0.928946	5e-05	0.000604383	yes
ENSG00000125691.11	ENSG00000125691.11	RPL23	chr17:38847864-38853843	Ctrl	siHIF1A	OK	955.145	676.533	-0.497559	-1.88874	5e-05	0.000604383	yes
ENSG00000125844.14	ENSG00000125844.14	RRBP1	chr20:17613677-17682295	Ctrl	siHIF1A	OK	37.7787	68.1349	0.850819	2.481	5e-05	0.000604383	yes
ENSG00000125898.11	ENSG00000125898.11	FAM110A	chr20:833714-857463	Ctrl	siHIF1A	OK	3.84582	2.27299	-0.758697	-1.82859	5e-05	0.000604383	yes
ENSG00000125945.13	ENSG00000125945.13	ZNF436	chr1:23359447-23371839	Ctrl	siHIF1A	OK	11.9094	8.72417	-0.449012	-1.67899	5e-05	0.000604383	yes
ENSG00000125965.7	ENSG00000125965.7	GDF5	chr20:35433028-35454746	Ctrl	siHIF1A	OK	0.603558	1.0016	0.73074	1.48442	5e-05	0.000604383	yes
ENSG00000125968.8	ENSG00000125968.8	ID1	chr20:31605282-31606515	Ctrl	siHIF1A	OK	39.8059	54.7506	0.459892	1.75965	5e-05	0.000604383	yes
ENSG00000126107.13	ENSG00000126107.13	HECTD3	chr1:45002539-45011329	Ctrl	siHIF1A	OK	17.6104	9.71888	-0.857561	-2.18001	5e-05	0.000604383	yes
ENSG00000126524.8	ENSG00000126524.8	SBDS	chr7:66987676-67239519	Ctrl	siHIF1A	OK	28.5886	43.9171	0.619343	2.18701	5e-05	0.000604383	yes
ENSG00000126561.15	ENSG00000126561.15	STAT5A	chr17:42287546-42311943	Ctrl	siHIF1A	OK	8.76842	4.90037	-0.839427	-2.06733	5e-05	0.000604383	yes
ENSG00000126709.13	ENSG00000126709.13	IFI6	chr1:27666060-27703063	Ctrl	siHIF1A	OK	283.225	1347.85	2.25064	7.43835	5e-05	0.000604383	yes
ENSG00000126775.8	ENSG00000126775.8	ATG14	chr14:55366391-55411858	Ctrl	siHIF1A	OK	5.23744	7.25941	0.470989	1.77955	5e-05	0.000604383	yes
ENSG00000126787.11	ENSG00000126787.11	DLGAP5	chr14:55148111-55191678	Ctrl	siHIF1A	OK	6.65894	3.95689	-0.750925	-2.28002	5e-05	0.000604383	yes
ENSG00000127311.8	ENSG00000127311.8	HELB	chr12:66302544-66804186	Ctrl	siHIF1A	OK	1.27832	0.605021	-1.07919	-1.35102	5e-05	0.000604383	yes
ENSG00000127334.10	ENSG00000127334.10	DYRK2	chr12:67648337-67670919	Ctrl	siHIF1A	OK	5.41027	2.82325	-0.938344	-1.93952	5e-05	0.000604383	yes
ENSG00000127419.15	ENSG00000127419.15	TMEM175	chr4:932386-958656	Ctrl	siHIF1A	OK	5.8894	11.4175	0.955049	1.84149	5e-05	0.000604383	yes
ENSG00000127528.5	ENSG00000127528.5	KLF2	chr19:16324816-16327874	Ctrl	siHIF1A	OK	10.2604	18.7145	0.867068	2.74702	5e-05	0.000604383	yes
ENSG00000127920.5	ENSG00000127920.5	GNG11	chr7:93921698-93928610	Ctrl	siHIF1A	OK	170.464	304.508	0.83701	3.15885	5e-05	0.000604383	yes
ENSG00000127952.15	ENSG00000127952.15	STYXL1	chr7:75996337-76048004	Ctrl	siHIF1A	OK	11.7432	19.217	0.710559	2.06313	5e-05	0.000604383	yes
ENSG00000128050.7	ENSG00000128050.7	PAICS	chr4:56435740-56464579	Ctrl	siHIF1A	OK	35.4563	26.0173	-0.446573	-1.45538	5e-05	0.000604383	yes
ENSG00000128059.7	ENSG00000128059.7	PPAT	chr4:56393361-56435615	Ctrl	siHIF1A	OK	8.34866	4.08516	-1.03115	-3.2664	5e-05	0.000604383	yes
ENSG00000128245.13	ENSG00000128245.13	YWHAH	chr22:31933520-31957603	Ctrl	siHIF1A	OK	35.5388	55.3569	0.639367	2.61351	5e-05	0.000604383	yes
ENSG00000128274.14	ENSG00000128274.14	A4GALT	chr22:42692120-42721298	Ctrl	siHIF1A	OK	10.6561	15.8022	0.56845	1.62454	5e-05	0.000604383	yes
ENSG00000128284.18	ENSG00000128284.18	APOL3	chr22:36140329-36166177	Ctrl	siHIF1A	OK	21.0246	33.8396	0.68663	1.86475	5e-05	0.000604383	yes
ENSG00000128335.12	ENSG00000128335.12	APOL2	chr22:36226202-36239954	Ctrl	siHIF1A	OK	14.3576	21.8685	0.60704	1.79214	5e-05	0.000604383	yes
ENSG00000128340.13	ENSG00000128340.13	RAC2	chr22:37225260-37244448	Ctrl	siHIF1A	OK	85.1389	50.1813	-0.762668	-3.07172	5e-05	0.000604383	yes
ENSG00000128567.15	ENSG00000128567.15	PODXL	chr7:131500261-131558217	Ctrl	siHIF1A	OK	42.6599	107.704	1.33612	3.83112	5e-05	0.000604383	yes
ENSG00000128595.15	ENSG00000128595.15	CALU	chr7:128739291-128771807	Ctrl	siHIF1A	OK	129.189	177.484	0.458205	1.74096	5e-05	0.000604383	yes
ENSG00000128596.15	ENSG00000128596.15	CCDC136	chr7:128790756-128822132	Ctrl	siHIF1A	OK	1.43332	0.410003	-1.80566	-1.28957	5e-05	0.000604383	yes
ENSG00000128602.8	ENSG00000128602.8	SMO	chr7:129188871-129213545	Ctrl	siHIF1A	OK	3.75416	2.26972	-0.725975	-2.07578	5e-05	0.000604383	yes
ENSG00000128606.11	ENSG00000128606.11	LRRC17	chr7:102813229-103074843	Ctrl	siHIF1A	OK	6.53744	1.41856	-2.2043	-2.6471	5e-05	0.000604383	yes
ENSG00000128641.16	ENSG00000128641.16	MYO1B	chr2:191229164-191425389	Ctrl	siHIF1A	OK	15.8685	7.35692	-1.10899	-2.84834	5e-05	0.000604383	yes
ENSG00000128791.10	ENSG00000128791.10	TWSG1	chr18:9334766-9402420	Ctrl	siHIF1A	OK	39.2064	23.3539	-0.747422	-3.04701	5e-05	0.000604383	yes
ENSG00000129195.14	ENSG00000129195.14	FAM64A	chr17:6444414-6556494	Ctrl	siHIF1A	OK	3.1169	1.47914	-1.07536	-1.87305	5e-05	0.000604383	yes
ENSG00000129422.12	ENSG00000129422.12	MTUS1	chr8:17576432-17800917	Ctrl	siHIF1A	OK	139.783	100.319	-0.478602	-1.27931	5e-05	0.000604383	yes
ENSG00000129467.12	ENSG00000129467.12	ADCY4	chr14:24318348-24340045	Ctrl	siHIF1A	OK	38.5881	65.2524	0.757874	1.9494	5e-05	0.000604383	yes
ENSG00000129518.7	ENSG00000129518.7	EAPP	chr14:34515928-34539711	Ctrl	siHIF1A	OK	6.43947	10.899	0.759185	2.429	5e-05	0.000604383	yes
ENSG00000129521.12	ENSG00000129521.12	EGLN3	chr14:33924230-34462774	Ctrl	siHIF1A	OK	8.50278	1.83395	-2.21298	-2.81272	5e-05	0.000604383	yes
ENSG00000129538.12	ENSG00000129538.12	RNASE1	chr14:20801227-20803278	Ctrl	siHIF1A	OK	287.908	209.63	-0.457763	-1.82022	5e-05	0.000604383	yes
ENSG00000129691.14	ENSG00000129691.14	ASH2L	chr8:38105241-38213301	Ctrl	siHIF1A	OK	16.407	10.3408	-0.665962	-1.49252	5e-05	0.000604383	yes
ENSG00000129757.11	ENSG00000129757.11	CDKN1C	chr11:2883212-2885881	Ctrl	siHIF1A	OK	4.88639	1.50778	-1.69634	-3.21154	5e-05	0.000604383	yes
ENSG00000129810.13	ENSG00000129810.13	SGOL1	chr3:20160592-20186427	Ctrl	siHIF1A	OK	1.34055	0.668773	-1.00324	-1.58028	5e-05	0.000604383	yes
ENSG00000129946.9	ENSG00000129946.9	SHC2	chr19:416582-460996	Ctrl	siHIF1A	OK	6.17043	2.80525	-1.13724	-2.80077	5e-05	0.000604383	yes
ENSG00000130021.12	ENSG00000130021.12	HDHD1	chrX:7048919-7148190	Ctrl	siHIF1A	OK	17.3851	12.6066	-0.463675	-1.73402	5e-05	0.000604383	yes
ENSG00000130147.14	ENSG00000130147.14	SH3BP4	chr2:234951972-235055714	Ctrl	siHIF1A	OK	38.7083	27.7664	-0.479303	-1.30876	5e-05	0.000604383	yes
ENSG00000130300.7	ENSG00000130300.7	PLVAP	chr19:17351447-17377350	Ctrl	siHIF1A	OK	6.85346	1.27058	-2.43135	-4.19724	5e-05	0.000604383	yes
ENSG00000130303.11	ENSG00000130303.11	BST2	chr19:17402938-17405648	Ctrl	siHIF1A	OK	109.724	280.685	1.35508	5.25892	5e-05	0.000604383	yes
ENSG00000130305.15	ENSG00000130305.15	NSUN5	chr7:73302516-73308867	Ctrl	siHIF1A	OK	3.04301	1.25132	-1.28205	-2.02254	5e-05	0.000604383	yes
ENSG00000130349.8	ENSG00000130349.8	C6orf203	chr6:107028212-107051342	Ctrl	siHIF1A	OK	7.69101	11.8153	0.619412	1.90524	5e-05	0.000604383	yes
ENSG00000130560.7	ENSG00000130560.7	UBAC1	chr9:135932968-135961380	Ctrl	siHIF1A	OK	11.187	16.8088	0.587394	1.95373	5e-05	0.000604383	yes
ENSG00000130584.9	ENSG00000130584.9	ZBTB46	chr20:63743665-63831244	Ctrl	siHIF1A	OK	1.52878	2.50671	0.713417	1.70685	5e-05	0.000604383	yes
ENSG00000130589.15	ENSG00000130589.15	HELZ2	chr20:63558085-63574239	Ctrl	siHIF1A	OK	12.2113	34.7257	1.50778	3.49254	5e-05	0.000604383	yes
ENSG00000130635.14	ENSG00000130635.14	COL5A1	chr9:134641773-134844843	Ctrl	siHIF1A	OK	23.0282	37	0.684127	1.71126	5e-05	0.000604383	yes
ENSG00000130638.14	ENSG00000130638.14	ATXN10	chr22:45657018-45845307	Ctrl	siHIF1A	OK	33.7456	21.7589	-0.633094	-1.57499	5e-05	0.000604383	yes
ENSG00000130684.12	ENSG00000130684.12	ZNF337	chr20:25612934-25696841	Ctrl	siHIF1A	OK	4.98751	7.27316	0.544263	1.63749	5e-05	0.000604383	yes
ENSG00000130762.13	ENSG00000130762.13	ARHGEF16	chr1:3454425-3481113	Ctrl	siHIF1A	OK	0.819489	0.308978	-1.40722	-1.63425	5e-05	0.000604383	yes
ENSG00000130779.18	ENSG00000130779.18	CLIP1	chr12:122271431-122422632	Ctrl	siHIF1A	OK	13.4954	18.898	0.485767	1.65435	5e-05	0.000604383	yes
ENSG00000130787.12	ENSG00000130787.12	HIP1R	chr12:122834452-122862960	Ctrl	siHIF1A	OK	33.4004	56.0597	0.747098	2.22943	5e-05	0.000604383	yes
ENSG00000130813.16	ENSG00000130813.16	C19orf66	chr19:10086121-10102796	Ctrl	siHIF1A	OK	13.3339	23.6947	0.829465	2.39458	5e-05	0.000604383	yes
ENSG00000130818.9	ENSG00000130818.9	ZNF426	chr19:9523223-9538627	Ctrl	siHIF1A	OK	2.7287	6.47843	1.24743	3.872	5e-05	0.000604383	yes
ENSG00000130821.14	ENSG00000130821.14	SLC6A8	chrX:153669729-153696593	Ctrl	siHIF1A	OK	37.2441	22.5257	-0.725444	-1.89733	5e-05	0.000604383	yes
ENSG00000130956.12	ENSG00000130956.12	HABP4	chr9:96450200-96619830	Ctrl	siHIF1A	OK	1.17916	2.98587	1.3404	3.15532	5e-05	0.000604383	yes
ENSG00000131016.15	ENSG00000131016.15	AKAP12	chr6:151239998-151358557	Ctrl	siHIF1A	OK	158.873	114	-0.478836	-1.56991	5e-05	0.000604383	yes
ENSG00000131019.9	ENSG00000131019.9	ULBP3	chr6:150063149-150069095	Ctrl	siHIF1A	OK	3.41637	1.70302	-1.00437	-2.27287	5e-05	0.000604383	yes
ENSG00000131378.12	ENSG00000131378.12	RFTN1	chr3:16265159-16514026	Ctrl	siHIF1A	OK	14.7241	24.7538	0.749467	2.45579	5e-05	0.000604383	yes
ENSG00000131386.16	ENSG00000131386.16	GALNT15	chr3:16174648-16231992	Ctrl	siHIF1A	OK	3.75611	10.1011	1.4272	4.13527	5e-05	0.000604383	yes
ENSG00000131389.15	ENSG00000131389.15	SLC6A6	chr3:14402575-14542081	Ctrl	siHIF1A	OK	50.3089	13.6297	-1.88406	-4.61404	5e-05	0.000604383	yes
ENSG00000131459.11	ENSG00000131459.11	GFPT2	chr5:180300689-180353387	Ctrl	siHIF1A	OK	2.00269	1.12871	-0.827264	-1.48997	5e-05	0.000604383	yes
ENSG00000131477.9	ENSG00000131477.9	RAMP2	chr17:42753913-42763041	Ctrl	siHIF1A	OK	19.3369	38.5903	0.996879	2.96839	5e-05	0.000604383	yes
ENSG00000131669.8	ENSG00000131669.8	NINJ1	chr9:93121488-93134288	Ctrl	siHIF1A	OK	68.7121	38.0681	-0.851982	-3.41013	5e-05	0.000604383	yes
ENSG00000131747.13	ENSG00000131747.13	TOP2A	chr17:40388515-40417950	Ctrl	siHIF1A	OK	10.2925	5.65495	-0.864007	-2.79935	5e-05	0.000604383	yes
ENSG00000131773.12	ENSG00000131773.12	KHDRBS3	chr8:135457456-135656722	Ctrl	siHIF1A	OK	15.1013	8.73839	-0.789237	-1.59587	5e-05	0.000604383	yes
ENSG00000131941.6	ENSG00000131941.6	RHPN2	chr19:32978592-33064888	Ctrl	siHIF1A	OK	1.24996	0.607678	-1.0405	-1.44779	5e-05	0.000604383	yes
ENSG00000131979.17	ENSG00000131979.17	GCH1	chr14:54842007-54902852	Ctrl	siHIF1A	OK	2.97977	4.95017	0.732279	2.05849	5e-05	0.000604383	yes
ENSG00000131981.14	ENSG00000131981.14	LGALS3	chr14:55124109-55145413	Ctrl	siHIF1A	OK	32.8204	54.1163	0.72147	2.72015	5e-05	0.000604383	yes
ENSG00000132003.8	ENSG00000132003.8	ZSWIM4	chr19:13795459-13832230	Ctrl	siHIF1A	OK	7.56765	5.08278	-0.574228	-1.92471	5e-05	0.000604383	yes
ENSG00000132109.9	ENSG00000132109.9	TRIM21	chr11:4384896-4393696	Ctrl	siHIF1A	OK	10.4003	15.7815	0.601612	1.97643	5e-05	0.000604383	yes
ENSG00000132205.9	ENSG00000132205.9	EMILIN2	chr18:2847029-2915993	Ctrl	siHIF1A	OK	5.73089	1.96087	-1.54727	-2.82247	5e-05	0.000604383	yes
ENSG00000132274.14	ENSG00000132274.14	TRIM22	chr11:5663556-5938619	Ctrl	siHIF1A	OK	50.0276	89.5846	0.840527	2.47826	5e-05	0.000604383	yes
ENSG00000132334.15	ENSG00000132334.15	PTPRE	chr10:127907060-128085855	Ctrl	siHIF1A	OK	26.7719	48.3576	0.853022	1.67141	5e-05	0.000604383	yes
ENSG00000132436.10	ENSG00000132436.10	FIGNL1	chr7:50444127-50565457	Ctrl	siHIF1A	OK	14.4382	9.08207	-0.668793	-1.76326	5e-05	0.000604383	yes
ENSG00000132470.12	ENSG00000132470.12	ITGB4	chr17:75721327-75765711	Ctrl	siHIF1A	OK	9.34049	33.0175	1.82166	2.93091	5e-05	0.000604383	yes
ENSG00000132530.15	ENSG00000132530.15	XAF1	chr17:6755446-6776116	Ctrl	siHIF1A	OK	12.7244	46.289	1.86308	2.93215	5e-05	0.000604383	yes
ENSG00000132622.9	ENSG00000132622.9	HSPA12B	chr20:3732666-3753111	Ctrl	siHIF1A	OK	5.44873	8.29704	0.606677	2.14194	5e-05	0.000604383	yes
ENSG00000132640.13	ENSG00000132640.13	BTBD3	chr20:11890722-11926609	Ctrl	siHIF1A	OK	9.25412	4.70657	-0.97542	-2.40887	5e-05	0.000604383	yes
ENSG00000132688.10	ENSG00000132688.10	NES	chr1:156668762-156677397	Ctrl	siHIF1A	OK	38.8078	57.1974	0.559604	2.24881	5e-05	0.000604383	yes
ENSG00000132718.8	ENSG00000132718.8	SYT11	chr1:155859508-155885199	Ctrl	siHIF1A	OK	12.3351	8.21601	-0.586257	-2.36857	5e-05	0.000604383	yes
ENSG00000132963.7	ENSG00000132963.7	POMP	chr13:28659103-28678925	Ctrl	siHIF1A	OK	88.3397	68.1884	-0.373535	-1.52822	5e-05	0.000604383	yes
ENSG00000133101.8	ENSG00000133101.8	CCNA1	chr13:36431519-36442882	Ctrl	siHIF1A	OK	16.5371	4.48218	-1.88343	-6.20428	5e-05	0.000604383	yes
ENSG00000133106.13	ENSG00000133106.13	EPSTI1	chr13:42886387-42992271	Ctrl	siHIF1A	OK	2.54326	8.84348	1.79793	2.87714	5e-05	0.000604383	yes
ENSG00000133393.11	ENSG00000133393.11	FOPNL	chr16:15865719-15888625	Ctrl	siHIF1A	OK	12.2184	22.2973	0.867809	2.87642	5e-05	0.000604383	yes
ENSG00000133466.12	ENSG00000133466.12	C1QTNF6	chr22:37125837-37199385	Ctrl	siHIF1A	OK	10.3849	6.90899	-0.587944	-1.94653	5e-05	0.000604383	yes
ENSG00000133561.14	ENSG00000133561.14	GIMAP6	chr7:150625374-150632648	Ctrl	siHIF1A	OK	45.6307	80.9535	0.827089	2.90519	5e-05	0.000604383	yes
ENSG00000133657.13	ENSG00000133657.13	ATP13A3	chr3:194402671-194518279	Ctrl	siHIF1A	OK	63.0564	29.5668	-1.09266	-2.33458	5e-05	0.000604383	yes
ENSG00000133800.7	ENSG00000133800.7	LYVE1	chr11:10541271-10693988	Ctrl	siHIF1A	OK	25.7277	52.5719	1.03097	3.16045	5e-05	0.000604383	yes
ENSG00000133805.14	ENSG00000133805.14	AMPD3	chr11:10308312-10507579	Ctrl	siHIF1A	OK	2.83311	1.28864	-1.13654	-1.30432	5e-05	0.000604383	yes
ENSG00000134013.14	ENSG00000134013.14	LOXL2	chr8:23297188-23457695	Ctrl	siHIF1A	OK	148.503	103.276	-0.523985	-1.26289	5e-05	0.000604383	yes
ENSG00000134049.4	ENSG00000134049.4	IER3IP1	chr18:47105945-47176374	Ctrl	siHIF1A	OK	9.69431	17.0112	0.811279	2.60456	5e-05	0.000604383	yes
ENSG00000134057.13	ENSG00000134057.13	CCNB1	chr5:69167009-69178245	Ctrl	siHIF1A	OK	22.5947	13.3059	-0.763923	-2.62451	5e-05	0.000604383	yes
ENSG00000134107.4	ENSG00000134107.4	BHLHE40	chr3:4896808-4985323	Ctrl	siHIF1A	OK	37.9019	25.8025	-0.554759	-1.82551	5e-05	0.000604383	yes
ENSG00000134138.18	ENSG00000134138.18	MEIS2	chr15:36889203-37101299	Ctrl	siHIF1A	OK	15.3859	28.698	0.899339	2.52339	5e-05	0.000604383	yes
ENSG00000134202.9	ENSG00000134202.9	GSTM3	chr1:109712254-109775428	Ctrl	siHIF1A	OK	28.4282	18.1883	-0.644312	-2.07155	5e-05	0.000604383	yes
ENSG00000134222.15	ENSG00000134222.15	PSRC1	chr1:109279555-109283186	Ctrl	siHIF1A	OK	3.70143	1.66685	-1.15096	-2.49866	5e-05	0.000604383	yes
ENSG00000134243.10	ENSG00000134243.10	SORT1	chr1:109309567-109397951	Ctrl	siHIF1A	OK	10.6772	6.17768	-0.789402	-2.60457	5e-05	0.000604383	yes
ENSG00000134250.16	ENSG00000134250.16	NOTCH2	chr1:119911552-120069626	Ctrl	siHIF1A	OK	11.4936	6.06662	-0.92186	-2.31567	5e-05	0.000604383	yes
ENSG00000134321.10	ENSG00000134321.10	RSAD2	chr2:6840569-6898239	Ctrl	siHIF1A	OK	0.714251	7.72258	3.43458	4.29243	5e-05	0.000604383	yes
ENSG00000134323.10	ENSG00000134323.10	MYCN	chr2:15920398-15947007	Ctrl	siHIF1A	OK	0.990127	0.426087	-1.21646	-2.20128	5e-05	0.000604383	yes
ENSG00000134326.10	ENSG00000134326.10	CMPK2	chr2:6840569-6898239	Ctrl	siHIF1A	OK	0.635479	5.76995	3.18264	3.14472	5e-05	0.000604383	yes
ENSG00000134333.12	ENSG00000134333.12	LDHA	chr11:18394387-18408425	Ctrl	siHIF1A	OK	289.959	90.4936	-1.67996	-6.17679	5e-05	0.000604383	yes
ENSG00000134352.18	ENSG00000134352.18	IL6ST	chr5:55935094-55994993	Ctrl	siHIF1A	OK	244.418	165.078	-0.566206	-0.870228	5e-05	0.000604383	yes
ENSG00000134508.11	ENSG00000134508.11	CABLES1	chr18:23134563-23437961	Ctrl	siHIF1A	OK	18.6483	35.9958	0.948785	2.31621	5e-05	0.000604383	yes
ENSG00000134532.14	ENSG00000134532.14	SOX5	chr12:23529499-23951032	Ctrl	siHIF1A	OK	0.919648	0.250196	-1.87802	-0.889794	5e-05	0.000604383	yes
ENSG00000134594.4	ENSG00000134594.4	RAB33A	chrX:130171648-130184870	Ctrl	siHIF1A	OK	0.92233	0.34735	-1.40889	-2.01646	5e-05	0.000604383	yes
ENSG00000134668.11	ENSG00000134668.11	SPOCD1	chr1:31789129-31816051	Ctrl	siHIF1A	OK	16.8545	10.9808	-0.618144	-2.21129	5e-05	0.000604383	yes
ENSG00000134758.12	ENSG00000134758.12	RNF138	chr18:32018371-32470484	Ctrl	siHIF1A	OK	13.7236	8.47511	-0.695358	-1.58615	5e-05	0.000604383	yes
ENSG00000134769.20	ENSG00000134769.20	DTNA	chr18:34493289-34891844	Ctrl	siHIF1A	OK	1.88427	0.949805	-0.988302	-1.09464	5e-05	0.000604383	yes
ENSG00000134802.16	ENSG00000134802.16	SLC43A3	chr11:57386793-57427580	Ctrl	siHIF1A	OK	69.5706	27.5389	-1.33701	-4.2818	5e-05	0.000604383	yes
ENSG00000134955.10	ENSG00000134955.10	SLC37A2	chr11:125063066-125090312	Ctrl	siHIF1A	OK	1.01152	2.44485	1.27322	2.30491	5e-05	0.000604383	yes
ENSG00000135046.12	ENSG00000135046.12	ANXA1	chr9:73151756-73170393	Ctrl	siHIF1A	OK	150.308	239.243	0.670554	2.59259	5e-05	0.000604383	yes
ENSG00000135047.13	ENSG00000135047.13	CTSL	chr9:87725518-87731393	Ctrl	siHIF1A	OK	61.347	84.5883	0.463467	1.79609	5e-05	0.000604383	yes
ENSG00000135052.15	ENSG00000135052.15	GOLM1	chr9:86026145-86100173	Ctrl	siHIF1A	OK	36.1717	54.8554	0.600771	2.05337	5e-05	0.000604383	yes
ENSG00000135114.11	ENSG00000135114.11	OASL	chr12:121019110-121039242	Ctrl	siHIF1A	OK	0.563834	2.21613	1.9747	3.23265	5e-05	0.000604383	yes
ENSG00000135312.5	ENSG00000135312.5	HTR1B	chr6:77462204-77463464	Ctrl	siHIF1A	OK	11.3072	24.0717	1.0901	3.77584	5e-05	0.000604383	yes
ENSG00000135324.5	ENSG00000135324.5	MRAP2	chr6:84033755-84090881	Ctrl	siHIF1A	OK	1.20484	0.56834	-1.08402	-2.18838	5e-05	0.000604383	yes
ENSG00000135547.7	ENSG00000135547.7	HEY2	chr6:125578557-125761269	Ctrl	siHIF1A	OK	1.50987	0.731138	-1.04621	-2.26099	5e-05	0.000604383	yes
ENSG00000135643.4	ENSG00000135643.4	KCNMB4	chr12:70366275-70434292	Ctrl	siHIF1A	OK	2.24806	1.06946	-1.0718	-1.8111	5e-05	0.000604383	yes
ENSG00000135823.12	ENSG00000135823.12	STX6	chr1:180913153-181023121	Ctrl	siHIF1A	OK	21.5502	13.0805	-0.720282	-2.55828	5e-05	0.000604383	yes
ENSG00000135842.15	ENSG00000135842.15	FAM129A	chr1:184790723-184974550	Ctrl	siHIF1A	OK	1.10205	0.467188	-1.23811	-2.02396	5e-05	0.000604383	yes
ENSG00000135899.15	ENSG00000135899.15	SP110	chr2:230121369-230313215	Ctrl	siHIF1A	OK	5.42815	13.9446	1.36118	3.37764	5e-05	0.000604383	yes
ENSG00000135916.14	ENSG00000135916.14	ITM2C	chr2:230864638-230879248	Ctrl	siHIF1A	OK	3.22628	0.391742	-3.04189	-2.47491	5e-05	0.000604383	yes
ENSG00000135929.7	ENSG00000135929.7	CYP27A1	chr2:218781748-218815293	Ctrl	siHIF1A	OK	11.6122	7.84512	-0.565777	-1.99678	5e-05	0.000604383	yes
ENSG00000136098.15	ENSG00000136098.15	NEK3	chr13:52033610-52159861	Ctrl	siHIF1A	OK	7.92197	4.49085	-0.818871	-1.96837	5e-05	0.000604383	yes
ENSG00000136108.13	ENSG00000136108.13	CKAP2	chr13:52455428-52476628	Ctrl	siHIF1A	OK	8.77395	5.21362	-0.750941	-2.60826	5e-05	0.000604383	yes
ENSG00000136158.9	ENSG00000136158.9	SPRY2	chr13:80335975-80340951	Ctrl	siHIF1A	OK	14.2314	9.86472	-0.528729	-1.96366	5e-05	0.000604383	yes
ENSG00000136193.15	ENSG00000136193.15	SCRN1	chr7:29920102-30026684	Ctrl	siHIF1A	OK	30.013	41.7323	0.475579	1.55118	5e-05	0.000604383	yes
ENSG00000136295.13	ENSG00000136295.13	TTYH3	chr7:2631950-2664802	Ctrl	siHIF1A	OK	73.6268	50.9159	-0.532117	-1.58773	5e-05	0.000604383	yes
ENSG00000136449.12	ENSG00000136449.12	MYCBPAP	chr17:50508383-50531501	Ctrl	siHIF1A	OK	0.844421	2.68348	1.66807	2.00257	5e-05	0.000604383	yes
ENSG00000136478.6	ENSG00000136478.6	TEX2	chr17:64147226-64263301	Ctrl	siHIF1A	OK	8.93142	12.8966	0.530029	1.82449	5e-05	0.000604383	yes
ENSG00000136514.2	ENSG00000136514.2	RTP4	chr3:187368331-187372076	Ctrl	siHIF1A	OK	0.76469	2.22088	1.53819	3.05053	5e-05	0.000604383	yes
ENSG00000136630.12	ENSG00000136630.12	HLX	chr1:220832762-220885059	Ctrl	siHIF1A	OK	13.3309	4.60441	-1.53369	-4.8144	5e-05	0.000604383	yes
ENSG00000136636.11	ENSG00000136636.11	KCTD3	chr1:215567391-215621807	Ctrl	siHIF1A	OK	13.4725	10.234	-0.396643	-1.41266	5e-05	0.000604383	yes
ENSG00000136807.10	ENSG00000136807.10	CDK9	chr9:127785678-127790787	Ctrl	siHIF1A	OK	21.0615	30.2074	0.520292	1.5425	5e-05	0.000604383	yes
ENSG00000136810.11	ENSG00000136810.11	TXN	chr9:110243810-110256640	Ctrl	siHIF1A	OK	206.219	96.2804	-1.09887	-4.49844	5e-05	0.000604383	yes
ENSG00000136819.13	ENSG00000136819.13	C9orf78	chr9:129827289-129881838	Ctrl	siHIF1A	OK	7.42497	14.7829	0.993473	2.40061	5e-05	0.000604383	yes
ENSG00000136826.13	ENSG00000136826.13	KLF4	chr9:107484851-107490482	Ctrl	siHIF1A	OK	1.76584	3.93525	1.1561	2.40779	5e-05	0.000604383	yes
ENSG00000136869.13	ENSG00000136869.13	TLR4	chr9:117704331-117716871	Ctrl	siHIF1A	OK	32.1134	23.1488	-0.472239	-1.52984	5e-05	0.000604383	yes
ENSG00000136897.7	ENSG00000136897.7	MRPL50	chr9:101387632-101398614	Ctrl	siHIF1A	OK	6.87243	4.87316	-0.495963	-1.74084	5e-05	0.000604383	yes
ENSG00000136938.8	ENSG00000136938.8	ANP32B	chr9:97983360-98015943	Ctrl	siHIF1A	OK	8.33056	5.49446	-0.600436	-1.70924	5e-05	0.000604383	yes
ENSG00000137033.10	ENSG00000137033.10	IL33	chr9:6215785-6257983	Ctrl	siHIF1A	OK	18.515	9.348	-0.985964	-3.60673	5e-05	0.000604383	yes
ENSG00000137054.14	ENSG00000137054.14	POLR1E	chr9:37485934-37503697	Ctrl	siHIF1A	OK	6.61628	4.53926	-0.543562	-1.79551	5e-05	0.000604383	yes
ENSG00000137154.11	ENSG00000137154.11	RPS6	chr9:19375450-19380254	Ctrl	siHIF1A	OK	796.69	583.46	-0.449384	-1.56961	5e-05	0.000604383	yes
ENSG00000137210.12	ENSG00000137210.12	TMEM14B	chr6:10747758-10979320	Ctrl	siHIF1A	OK	43.3288	29.1536	-0.571653	-1.99154	5e-05	0.000604383	yes
ENSG00000137393.9	ENSG00000137393.9	RNF144B	chr6:18387349-18468874	Ctrl	siHIF1A	OK	13.2851	22.1464	0.737259	2.96594	5e-05	0.000604383	yes
ENSG00000137414.5	ENSG00000137414.5	FAM8A1	chr6:17600354-17611719	Ctrl	siHIF1A	OK	13.4019	9.93206	-0.432275	-1.71589	5e-05	0.000604383	yes
ENSG00000137547.7	ENSG00000137547.7	MRPL15	chr8:54135209-54147901	Ctrl	siHIF1A	OK	42.1111	55.8393	0.407081	1.63722	5e-05	0.000604383	yes
ENSG00000137563.10	ENSG00000137563.10	GGH	chr8:63015078-63039171	Ctrl	siHIF1A	OK	30.819	21.6537	-0.509207	-1.78882	5e-05	0.000604383	yes
ENSG00000137573.12	ENSG00000137573.12	SULF1	chr8:69466623-69660915	Ctrl	siHIF1A	OK	0.432488	1.38729	1.68154	0.869871	5e-05	0.000604383	yes
ENSG00000137628.15	ENSG00000137628.15	DDX60	chr4:168216292-168318807	Ctrl	siHIF1A	OK	6.0094	15.7282	1.38806	3.3274	5e-05	0.000604383	yes
ENSG00000137693.12	ENSG00000137693.12	YAP1	chr11:102110460-102233423	Ctrl	siHIF1A	OK	5.75832	3.72532	-0.628283	-1.79884	5e-05	0.000604383	yes
ENSG00000137710.13	ENSG00000137710.13	RDX	chr11:110174879-110296722	Ctrl	siHIF1A	OK	99.9103	54.89	-0.864089	-2.86656	5e-05	0.000604383	yes
ENSG00000137727.11	ENSG00000137727.11	ARHGAP20	chr11:110577041-110713189	Ctrl	siHIF1A	OK	1.07169	2.36822	1.14392	3.59981	5e-05	0.000604383	yes
ENSG00000137804.11	ENSG00000137804.11	NUSAP1	chr15:41332693-41381050	Ctrl	siHIF1A	OK	9.82846	6.05713	-0.698332	-1.7395	5e-05	0.000604383	yes
ENSG00000137807.12	ENSG00000137807.12	KIF23	chr15:69298946-69448427	Ctrl	siHIF1A	OK	6.76034	3.42578	-0.980664	-2.49021	5e-05	0.000604383	yes
ENSG00000137959.14	ENSG00000137959.14	IFI44L	chr1:78619921-78646145	Ctrl	siHIF1A	OK	27.9587	121.516	2.11977	4.49875	5e-05	0.000604383	yes
ENSG00000137965.9	ENSG00000137965.9	IFI44	chr1:78649795-78664078	Ctrl	siHIF1A	OK	21.4634	74.5669	1.79666	5.1892	5e-05	0.000604383	yes
ENSG00000137968.15	ENSG00000137968.15	SLC44A5	chr1:75202130-75611116	Ctrl	siHIF1A	OK	2.12643	0.890211	-1.25622	-3.18018	5e-05	0.000604383	yes
ENSG00000138080.12	ENSG00000138080.12	EMILIN1	chr2:27078566-27086408	Ctrl	siHIF1A	OK	2.30985	3.58917	0.635847	1.90969	5e-05	0.000604383	yes
ENSG00000138160.5	ENSG00000138160.5	KIF11	chr10:92593285-92655395	Ctrl	siHIF1A	OK	3.88767	2.50272	-0.635412	-2.25352	5e-05	0.000604383	yes
ENSG00000138180.14	ENSG00000138180.14	CEP55	chr10:93496631-93529092	Ctrl	siHIF1A	OK	8.15801	4.86738	-0.745071	-2.58964	5e-05	0.000604383	yes
ENSG00000138279.14	ENSG00000138279.14	ANXA7	chr10:73375100-73414076	Ctrl	siHIF1A	OK	24.7992	38.977	0.65233	2.27042	5e-05	0.000604383	yes
ENSG00000138439.11	ENSG00000138439.11	FAM117B	chr2:202635187-202769757	Ctrl	siHIF1A	OK	2.34947	1.1792	-0.994524	-2.43571	5e-05	0.000604383	yes
ENSG00000138448.10	ENSG00000138448.10	ITGAV	chr2:186590064-186765965	Ctrl	siHIF1A	OK	166.861	100.731	-0.728132	-2.14609	5e-05	0.000604383	yes
ENSG00000138496.15	ENSG00000138496.15	PARP9	chr3:122527923-122575203	Ctrl	siHIF1A	OK	11.4622	32.1746	1.48904	3.32623	5e-05	0.000604383	yes
ENSG00000138623.8	ENSG00000138623.8	SEMA7A	chr15:74409288-74434467	Ctrl	siHIF1A	OK	0.903832	0.317169	-1.5108	-1.74681	5e-05	0.000604383	yes
ENSG00000138639.16	ENSG00000138639.16	ARHGAP24	chr4:85475113-86002670	Ctrl	siHIF1A	OK	21.6558	32.5492	0.58787	1.67226	5e-05	0.000604383	yes
ENSG00000138642.13	ENSG00000138642.13	HERC6	chr4:88378738-88443111	Ctrl	siHIF1A	OK	2.53253	11.7012	2.20801	5.06145	5e-05	0.000604383	yes
ENSG00000138668.17	ENSG00000138668.17	HNRNPD	chr4:82352497-82384027	Ctrl	siHIF1A	OK	26.6236	15.223	-0.806457	-2.34305	5e-05	0.000604383	yes
ENSG00000138675.15	ENSG00000138675.15	FGF5	chr4:80266598-80963756	Ctrl	siHIF1A	OK	5.4614	2.69738	-1.01771	-2.98772	5e-05	0.000604383	yes
ENSG00000138757.13	ENSG00000138757.13	G3BP2	chr4:75642781-75724525	Ctrl	siHIF1A	OK	30.491	56.1245	0.880245	2.60744	5e-05	0.000604383	yes
ENSG00000138772.11	ENSG00000138772.11	ANXA3	chr4:78551518-78610451	Ctrl	siHIF1A	OK	32.3365	46.6222	0.527854	1.97763	5e-05	0.000604383	yes
ENSG00000138821.11	ENSG00000138821.11	SLC39A8	chr4:102251040-102450010	Ctrl	siHIF1A	OK	3.28438	1.28574	-1.35302	-2.29321	5e-05	0.000604383	yes
ENSG00000138867.15	ENSG00000138867.15	GUCD1	chr22:24540422-24629005	Ctrl	siHIF1A	OK	24.7658	39.5397	0.674952	1.64017	5e-05	0.000604383	yes
ENSG00000139187.8	ENSG00000139187.8	KLRG1	chr12:8950043-9010760	Ctrl	siHIF1A	OK	10.1623	5.55413	-0.871598	-2.34814	5e-05	0.000604383	yes
ENSG00000139289.12	ENSG00000139289.12	PHLDA1	chr12:76025446-76033932	Ctrl	siHIF1A	OK	28.941	21.3729	-0.437329	-1.7306	5e-05	0.000604383	yes
ENSG00000139318.7	ENSG00000139318.7	DUSP6	chr12:89347231-89353271	Ctrl	siHIF1A	OK	116.572	66.2397	-0.815451	-2.41567	5e-05	0.000604383	yes
ENSG00000139354.9	ENSG00000139354.9	GAS2L3	chr12:100573682-100628286	Ctrl	siHIF1A	OK	19.3642	9.74047	-0.991331	-2.24162	5e-05	0.000604383	yes
ENSG00000139505.11	ENSG00000139505.11	MTMR6	chr13:25246200-25288009	Ctrl	siHIF1A	OK	14.332	8.7093	-0.718609	-2.79544	5e-05	0.000604383	yes
ENSG00000139549.2	ENSG00000139549.2	DHH	chr12:49089420-49094819	Ctrl	siHIF1A	OK	2.87285	1.22278	-1.23232	-2.63845	5e-05	0.000604383	yes
ENSG00000139726.9	ENSG00000139726.9	DENR	chr12:122752773-122771064	Ctrl	siHIF1A	OK	17.3733	29.2398	0.751064	2.48988	5e-05	0.000604383	yes
ENSG00000139737.20	ENSG00000139737.20	SLAIN1	chr13:77697853-77764242	Ctrl	siHIF1A	OK	1.00817	0.398362	-1.33959	-1.0901	5e-05	0.000604383	yes
ENSG00000139832.4	ENSG00000139832.4	RAB20	chr13:110523065-110561733	Ctrl	siHIF1A	OK	1.42283	0.48836	-1.54275	-2.72054	5e-05	0.000604383	yes
ENSG00000139921.11	ENSG00000139921.11	TMX1	chr14:51240161-51257546	Ctrl	siHIF1A	OK	42.5362	23.3783	-0.863521	-3.16074	5e-05	0.000604383	yes
ENSG00000140092.13	ENSG00000140092.13	FBLN5	chr14:91869411-91947987	Ctrl	siHIF1A	OK	5.63272	3.54523	-0.667953	-1.50867	5e-05	0.000604383	yes
ENSG00000140105.16	ENSG00000140105.16	WARS	chr14:100333787-100530303	Ctrl	siHIF1A	OK	85.5572	153.09	0.839423	2.34353	5e-05	0.000604383	yes
ENSG00000140406.3	ENSG00000140406.3	MESDC1	chr15:81000943-81005788	Ctrl	siHIF1A	OK	9.28319	6.39822	-0.536951	-1.99996	5e-05	0.000604383	yes
ENSG00000140416.18	ENSG00000140416.18	TPM1	chr15:63042631-63071915	Ctrl	siHIF1A	OK	291.326	180.163	-0.693331	-2.09955	5e-05	0.000604383	yes
ENSG00000140450.8	ENSG00000140450.8	ARRDC4	chr15:97960697-97973838	Ctrl	siHIF1A	OK	0.858197	0.308208	-1.4774	-2.96928	5e-05	0.000604383	yes
ENSG00000140678.15	ENSG00000140678.15	ITGAX	chr16:31355133-31382997	Ctrl	siHIF1A	OK	0.602731	0.0915976	-2.71813	-1.02984	5e-05	0.000604383	yes
ENSG00000140682.17	ENSG00000140682.17	TGFB1I1	chr16:31470203-31477960	Ctrl	siHIF1A	OK	48.2548	27.2487	-0.824486	-2.89799	5e-05	0.000604383	yes
ENSG00000140873.14	ENSG00000140873.14	ADAMTS18	chr16:77190834-77444336	Ctrl	siHIF1A	OK	27.2237	50.8361	0.90099	1.78156	5e-05	0.000604383	yes
ENSG00000140905.8	ENSG00000140905.8	GCSH	chr16:81053496-81096403	Ctrl	siHIF1A	OK	15.2992	9.17129	-0.738258	-2.03631	5e-05	0.000604383	yes
ENSG00000140943.15	ENSG00000140943.15	MBTPS1	chr16:84053760-84116906	Ctrl	siHIF1A	OK	34.0902	50.4073	0.564277	1.57504	5e-05	0.000604383	yes
ENSG00000141424.11	ENSG00000141424.11	SLC39A6	chr18:36108531-36129385	Ctrl	siHIF1A	OK	8.28587	6.02093	-0.460666	-1.64165	5e-05	0.000604383	yes
ENSG00000141425.16	ENSG00000141425.16	RPRD1A	chr18:35984386-36067576	Ctrl	siHIF1A	OK	23.1958	12.6214	-0.877996	-3.00562	5e-05	0.000604383	yes
ENSG00000141448.7	ENSG00000141448.7	GATA6	chr18:22169442-22205229	Ctrl	siHIF1A	OK	4.25368	2.67962	-0.66668	-1.96314	5e-05	0.000604383	yes
ENSG00000141505.10	ENSG00000141505.10	ASGR1	chr17:7173430-7179564	Ctrl	siHIF1A	OK	8.06659	4.77436	-0.756651	-1.8085	5e-05	0.000604383	yes
ENSG00000141526.13	ENSG00000141526.13	SLC16A3	chr17:82228396-82273731	Ctrl	siHIF1A	OK	186.165	95.4678	-0.963495	-2.21868	5e-05	0.000604383	yes
ENSG00000141753.6	ENSG00000141753.6	IGFBP4	chr17:40443460-40457731	Ctrl	siHIF1A	OK	103.503	163.479	0.659429	2.61071	5e-05	0.000604383	yes
ENSG00000141934.8	ENSG00000141934.8	PPAP2C	chr19:281039-291504	Ctrl	siHIF1A	OK	5.5043	3.09853	-0.828976	-1.82127	5e-05	0.000604383	yes
ENSG00000141959.15	ENSG00000141959.15	PFKL	chr21:44300050-44327376	Ctrl	siHIF1A	OK	52.9922	72.6378	0.454939	1.74447	5e-05	0.000604383	yes
ENSG00000142089.14	ENSG00000142089.14	IFITM3	chr11:318639-330122	Ctrl	siHIF1A	OK	278.296	489.378	0.81433	3.19275	5e-05	0.000604383	yes
ENSG00000142166.11	ENSG00000142166.11	IFNAR1	chr21:33324476-33359862	Ctrl	siHIF1A	OK	14.3374	9.29779	-0.624827	-1.79533	5e-05	0.000604383	yes
ENSG00000142173.13	ENSG00000142173.13	COL6A2	chr21:46098096-46132849	Ctrl	siHIF1A	OK	1.04218	0.235055	-2.14853	-1.42594	5e-05	0.000604383	yes
ENSG00000142208.14	ENSG00000142208.14	AKT1	chr14:104769348-104795751	Ctrl	siHIF1A	OK	41.7796	57.4469	0.45943	1.66933	5e-05	0.000604383	yes
ENSG00000142405.20	ENSG00000142405.20	NLRP12	chr19:53793602-53824394	Ctrl	siHIF1A	OK	0.57612	0.14008	-2.04012	-2.91656	5e-05	0.000604383	yes
ENSG00000142408.2	ENSG00000142408.2	CACNG8	chr19:53963039-53990215	Ctrl	siHIF1A	OK	1.08045	0.735251	-0.555329	-1.70713	5e-05	0.000604383	yes
ENSG00000142459.7	ENSG00000142459.7	EVI5L	chr19:7830232-7864976	Ctrl	siHIF1A	OK	4.31619	7.60853	0.817859	2.36472	5e-05	0.000604383	yes
ENSG00000142552.6	ENSG00000142552.6	RCN3	chr19:49527617-49546962	Ctrl	siHIF1A	OK	31.7281	48.3116	0.60661	1.86235	5e-05	0.000604383	yes
ENSG00000142627.12	ENSG00000142627.12	EPHA2	chr1:16124336-16157329	Ctrl	siHIF1A	OK	53.1301	76.2713	0.521612	1.76773	5e-05	0.000604383	yes
ENSG00000142784.14	ENSG00000142784.14	WDTC1	chr1:27234515-27308633	Ctrl	siHIF1A	OK	8.56095	11.8178	0.465116	1.76536	5e-05	0.000604383	yes
ENSG00000142892.13	ENSG00000142892.13	PIGK	chr1:77088989-77219430	Ctrl	siHIF1A	OK	11.5463	22.0458	0.933079	2.40832	5e-05	0.000604383	yes
ENSG00000143127.11	ENSG00000143127.11	ITGA10	chr1:145891207-145910189	Ctrl	siHIF1A	OK	35.8587	70.8642	0.982733	2.69175	5e-05	0.000604383	yes
ENSG00000143248.11	ENSG00000143248.11	RGS5	chr1:163111120-163355764	Ctrl	siHIF1A	OK	86.4126	47.5297	-0.862413	-1.85357	5e-05	0.000604383	yes
ENSG00000143344.14	ENSG00000143344.14	RGL1	chr1:183636084-183928531	Ctrl	siHIF1A	OK	17.9103	10.1431	-0.820292	-3.33148	5e-05	0.000604383	yes
ENSG00000143367.14	ENSG00000143367.14	TUFT1	chr1:151540304-151583583	Ctrl	siHIF1A	OK	1.28529	2.31018	0.845906	1.84987	5e-05	0.000604383	yes
ENSG00000143369.13	ENSG00000143369.13	ECM1	chr1:150508061-150513789	Ctrl	siHIF1A	OK	5.563	1.81302	-1.61747	-4.3645	5e-05	0.000604383	yes
ENSG00000143387.11	ENSG00000143387.11	CTSK	chr1:150796207-150808323	Ctrl	siHIF1A	OK	23.3213	15.3418	-0.60418	-2.29204	5e-05	0.000604383	yes
ENSG00000143416.19	ENSG00000143416.19	SELENBP1	chr1:151364301-151372733	Ctrl	siHIF1A	OK	4.17659	2.14996	-0.958013	-2.07938	5e-05	0.000604383	yes
ENSG00000143420.16	ENSG00000143420.16	ENSA	chr1:150600850-150629612	Ctrl	siHIF1A	OK	23.3672	43.309	0.890181	2.79302	5e-05	0.000604383	yes
ENSG00000143469.15	ENSG00000143469.15	SYT14	chr1:209938173-210171315	Ctrl	siHIF1A	OK	1.7802	0.726456	-1.29309	-3.17263	5e-05	0.000604383	yes
ENSG00000143537.12	ENSG00000143537.12	ADAM15	chr1:155033823-155062775	Ctrl	siHIF1A	OK	117.102	269.393	1.20195	3.61555	5e-05	0.000604383	yes
ENSG00000143756.10	ENSG00000143756.10	FBXO28	chr1:224114086-224162047	Ctrl	siHIF1A	OK	22.3964	14.1631	-0.66113	-2.1992	5e-05	0.000604383	yes
ENSG00000143793.11	ENSG00000143793.11	C1orf35	chr1:228100725-228105411	Ctrl	siHIF1A	OK	7.34649	11.1728	0.604863	1.87661	5e-05	0.000604383	yes
ENSG00000143815.13	ENSG00000143815.13	LBR	chr1:225401501-225428925	Ctrl	siHIF1A	OK	46.539	33.7064	-0.465415	-1.5239	5e-05	0.000604383	yes
ENSG00000143816.7	ENSG00000143816.7	WNT9A	chr1:227918655-227947898	Ctrl	siHIF1A	OK	1.46457	4.26667	1.54264	4.60059	5e-05	0.000604383	yes
ENSG00000143869.6	ENSG00000143869.6	GDF7	chr2:20666663-20679245	Ctrl	siHIF1A	OK	2.43047	1.41203	-0.783462	-2.63737	5e-05	0.000604383	yes
ENSG00000143947.11	ENSG00000143947.11	RPS27A	chr2:55174790-55235853	Ctrl	siHIF1A	OK	636.021	459.038	-0.470462	-1.77605	5e-05	0.000604383	yes
ENSG00000143952.18	ENSG00000143952.18	VPS54	chr2:63892145-64019072	Ctrl	siHIF1A	OK	11.0295	8.40316	-0.392359	-1.5327	5e-05	0.000604383	yes
ENSG00000143971.7	ENSG00000143971.7	ETAA1	chr2:67397318-67410545	Ctrl	siHIF1A	OK	5.47601	7.45978	0.446007	1.45046	5e-05	0.000604383	yes
ENSG00000144231.9	ENSG00000144231.9	POLR2D	chr2:127843550-127858157	Ctrl	siHIF1A	OK	5.9449	10.1502	0.771784	2.11011	5e-05	0.000604383	yes
ENSG00000144455.12	ENSG00000144455.12	SUMF1	chr3:3700813-4467281	Ctrl	siHIF1A	OK	28.5566	42.0353	0.557778	2.11796	5e-05	0.000604383	yes
ENSG00000144583.4	ENSG00000144583.4	2016-03-04	chr2:216257864-216372027	Ctrl	siHIF1A	OK	3.52054	5.00229	0.506793	1.73787	5e-05	0.000604383	yes
ENSG00000144810.14	ENSG00000144810.14	COL8A1	chr3:99638474-99799226	Ctrl	siHIF1A	OK	74.6136	127.952	0.778097	2.23507	5e-05	0.000604383	yes
ENSG00000144837.7	ENSG00000144837.7	PLA1A	chr3:119597841-119629811	Ctrl	siHIF1A	OK	0.136535	1.42333	3.38192	1.75768	5e-05	0.000604383	yes
ENSG00000145113.20	ENSG00000145113.20	MUC4	chr3:195746764-195812277	Ctrl	siHIF1A	OK	0.587288	0.0560073	-3.39038	-0.959478	5e-05	0.000604383	yes
ENSG00000145247.10	ENSG00000145247.10	OCIAD2	chr4:48885018-48906937	Ctrl	siHIF1A	OK	82.8539	34.3498	-1.27027	-4.07682	5e-05	0.000604383	yes
ENSG00000145386.8	ENSG00000145386.8	CCNA2	chr4:121801316-121823933	Ctrl	siHIF1A	OK	9.36124	5.91507	-0.662305	-1.681	5e-05	0.000604383	yes
ENSG00000145391.12	ENSG00000145391.12	SETD7	chr4:139495940-139606699	Ctrl	siHIF1A	OK	6.84548	19.6562	1.52176	5.36724	5e-05	0.000604383	yes
ENSG00000145882.9	ENSG00000145882.9	PCYOX1L	chr5:149358006-149369653	Ctrl	siHIF1A	OK	4.7553	9.66029	1.02253	3.54946	5e-05	0.000604383	yes
ENSG00000146072.6	ENSG00000146072.6	TNFRSF21	chr6:47231531-47309905	Ctrl	siHIF1A	OK	21.8714	28.5722	0.385566	1.59083	5e-05	0.000604383	yes
ENSG00000146205.12	ENSG00000146205.12	ANO7	chr2:241188508-241225377	Ctrl	siHIF1A	OK	1.78165	0.847271	-1.07232	-1.66338	5e-05	0.000604383	yes
ENSG00000146232.13	ENSG00000146232.13	NFKBIE	chr6:44258165-44265788	Ctrl	siHIF1A	OK	13.5814	7.81301	-0.797677	-2.58261	5e-05	0.000604383	yes
ENSG00000146242.7	ENSG00000146242.7	TPBG	chr6:82363205-82370828	Ctrl	siHIF1A	OK	9.95143	4.91551	-1.01756	-3.43549	5e-05	0.000604383	yes
ENSG00000146281.5	ENSG00000146281.5	PM20D2	chr6:89146049-89165565	Ctrl	siHIF1A	OK	3.46919	2.48036	-0.484046	-1.57662	5e-05	0.000604383	yes
ENSG00000146476.9	ENSG00000146476.9	C6orf211	chr6:151452257-151470101	Ctrl	siHIF1A	OK	25.0376	17.2045	-0.541308	-2.11191	5e-05	0.000604383	yes
ENSG00000146731.9	ENSG00000146731.9	CCT6A	chr7:56051629-56063989	Ctrl	siHIF1A	OK	78.3469	54.6039	-0.520871	-1.69535	5e-05	0.000604383	yes
ENSG00000146858.7	ENSG00000146858.7	ZC3HAV1L	chr7:139025705-139036029	Ctrl	siHIF1A	OK	5.59494	3.56624	-0.649719	-1.84979	5e-05	0.000604383	yes
ENSG00000147010.16	ENSG00000147010.16	SH3KBP1	chrX:19533974-19887601	Ctrl	siHIF1A	OK	6.92917	5.07394	-0.449574	-1.56808	5e-05	0.000604383	yes
ENSG00000147027.3	ENSG00000147027.3	TMEM47	chrX:34627063-34657288	Ctrl	siHIF1A	OK	21.1825	15.3555	-0.464116	-1.86984	5e-05	0.000604383	yes
ENSG00000147113.15	ENSG00000147113.15	CXorf36	chrX:45148373-45333917	Ctrl	siHIF1A	OK	4.43488	12.7905	1.5281	4.90723	5e-05	0.000604383	yes
ENSG00000147394.17	ENSG00000147394.17	ZNF185	chrX:152914441-152973480	Ctrl	siHIF1A	OK	8.45866	12.7439	0.591302	2.26744	5e-05	0.000604383	yes
ENSG00000147454.12	ENSG00000147454.12	SLC25A37	chr8:23528804-23575463	Ctrl	siHIF1A	OK	51.6594	33.1242	-0.641146	-2.0875	5e-05	0.000604383	yes
ENSG00000147604.12	ENSG00000147604.12	RPL7	chr8:73290266-73356461	Ctrl	siHIF1A	OK	861.801	624.508	-0.464635	-1.67593	5e-05	0.000604383	yes
ENSG00000147697.7	ENSG00000147697.7	GSDMC	chr8:129748195-129786888	Ctrl	siHIF1A	OK	1.64042	5.11989	1.64204	3.04675	5e-05	0.000604383	yes
ENSG00000147854.15	ENSG00000147854.15	UHRF2	chr9:6413150-6507054	Ctrl	siHIF1A	OK	39.1448	52.7153	0.429401	1.33685	5e-05	0.000604383	yes
ENSG00000148339.11	ENSG00000148339.11	SLC25A25	chr9:128061232-128118693	Ctrl	siHIF1A	OK	4.958	9.01917	0.863236	2.1611	5e-05	0.000604383	yes
ENSG00000148660.19	ENSG00000148660.19	CAMK2G	chr10:73812500-73874591	Ctrl	siHIF1A	OK	9.11454	12.6722	0.475427	1.55334	5e-05	0.000604383	yes
ENSG00000148700.12	ENSG00000148700.12	ADD3	chr10:109940103-110135565	Ctrl	siHIF1A	OK	37.7177	16.7287	-1.17291	-2.75082	5e-05	0.000604383	yes
ENSG00000148719.13	ENSG00000148719.13	DNAJB12	chr10:72332829-72355230	Ctrl	siHIF1A	OK	11.2073	15.5849	0.475715	1.66425	5e-05	0.000604383	yes
ENSG00000148730.6	ENSG00000148730.6	EIF4EBP2	chr10:70404378-70428618	Ctrl	siHIF1A	OK	21.9293	16.7647	-0.387429	-1.60593	5e-05	0.000604383	yes
ENSG00000148908.13	ENSG00000148908.13	RGS10	chr10:119499827-119542708	Ctrl	siHIF1A	OK	18.8891	13.4584	-0.489052	-1.6368	5e-05	0.000604383	yes
ENSG00000148926.8	ENSG00000148926.8	ADM	chr11:10304679-10307397	Ctrl	siHIF1A	OK	128.208	85.5241	-0.584082	-2.16717	5e-05	0.000604383	yes
ENSG00000148943.10	ENSG00000148943.10	LIN7C	chr11:27494575-27506773	Ctrl	siHIF1A	OK	18.9888	12.8249	-0.566198	-2.28217	5e-05	0.000604383	yes
ENSG00000149150.7	ENSG00000149150.7	SLC43A1	chr11:57484533-57515786	Ctrl	siHIF1A	OK	8.65849	5.60413	-0.627625	-1.63994	5e-05	0.000604383	yes
ENSG00000149177.11	ENSG00000149177.11	PTPRJ	chr11:47980557-48170841	Ctrl	siHIF1A	OK	4.15928	2.72954	-0.607678	-1.61696	5e-05	0.000604383	yes
ENSG00000149218.4	ENSG00000149218.4	ENDOD1	chr11:95089809-95132645	Ctrl	siHIF1A	OK	8.24738	14.239	0.787838	3.13396	5e-05	0.000604383	yes
ENSG00000149257.12	ENSG00000149257.12	SERPINH1	chr11:75562055-75572783	Ctrl	siHIF1A	OK	168.83	252.05	0.578132	1.97382	5e-05	0.000604383	yes
ENSG00000149260.13	ENSG00000149260.13	CAPN5	chr11:77066931-77126155	Ctrl	siHIF1A	OK	7.63455	4.21282	-0.857758	-2.05472	5e-05	0.000604383	yes
ENSG00000149289.9	ENSG00000149289.9	ZC3H12C	chr11:110093360-110171841	Ctrl	siHIF1A	OK	9.56241	6.59505	-0.535991	-2.10712	5e-05	0.000604383	yes
ENSG00000149313.9	ENSG00000149313.9	AASDHPPT	chr11:106051097-106101975	Ctrl	siHIF1A	OK	22.7694	15.2949	-0.574045	-2.11002	5e-05	0.000604383	yes
ENSG00000149428.17	ENSG00000149428.17	HYOU1	chr11:119044187-119057202	Ctrl	siHIF1A	OK	69.8023	98.8543	0.502029	1.49989	5e-05	0.000604383	yes
ENSG00000149541.8	ENSG00000149541.8	B3GAT3	chr11:62615295-62622175	Ctrl	siHIF1A	OK	26.0817	17.4726	-0.577941	-1.97791	5e-05	0.000604383	yes
ENSG00000149573.7	ENSG00000149573.7	MPZL2	chr11:118253402-118264536	Ctrl	siHIF1A	OK	62.2355	123.062	0.983576	3.57743	5e-05	0.000604383	yes
ENSG00000149925.15	ENSG00000149925.15	ALDOA	chr16:30053089-30070457	Ctrl	siHIF1A	OK	847.711	504.226	-0.7495	-2.29666	5e-05	0.000604383	yes
ENSG00000149948.12	ENSG00000149948.12	HMGA2	chr12:65758019-65966295	Ctrl	siHIF1A	OK	18.7771	8.27106	-1.18283	-3.32018	5e-05	0.000604383	yes
ENSG00000150551.10	ENSG00000150551.10	LYPD1	chr2:132416573-132671579	Ctrl	siHIF1A	OK	31.6062	18.5678	-0.767403	-2.82982	5e-05	0.000604383	yes
ENSG00000150594.6	ENSG00000150594.6	ADRA2A	chr10:111077162-111080907	Ctrl	siHIF1A	OK	0.544575	0.123387	-2.14193	-2.76211	5e-05	0.000604383	yes
ENSG00000150712.9	ENSG00000150712.9	MTMR12	chr5:32226993-32313009	Ctrl	siHIF1A	OK	17.1884	10.8542	-0.663188	-1.9369	5e-05	0.000604383	yes
ENSG00000150990.6	ENSG00000150990.6	DHX37	chr12:124946824-124989122	Ctrl	siHIF1A	OK	4.17331	7.44609	0.835292	2.27438	5e-05	0.000604383	yes
ENSG00000151012.12	ENSG00000151012.12	SLC7A11	chr4:138027421-138242349	Ctrl	siHIF1A	OK	51.6131	36.8298	-0.486866	-1.53927	5e-05	0.000604383	yes
ENSG00000151062.13	ENSG00000151062.13	CACNA2D4	chr12:1791956-1922867	Ctrl	siHIF1A	OK	2.50727	0.695183	-1.85065	-1.68736	5e-05	0.000604383	yes
ENSG00000151151.5	ENSG00000151151.5	IPMK	chr10:58191516-58267934	Ctrl	siHIF1A	OK	7.17072	3.59223	-0.997238	-3.6597	5e-05	0.000604383	yes
ENSG00000151233.9	ENSG00000151233.9	GXYLT1	chr12:42081844-42144879	Ctrl	siHIF1A	OK	6.76248	10.8134	0.677199	1.95272	5e-05	0.000604383	yes
ENSG00000151414.13	ENSG00000151414.13	NEK7	chr1:198156962-198322420	Ctrl	siHIF1A	OK	35.0303	25.5302	-0.4564	-1.49738	5e-05	0.000604383	yes
ENSG00000151623.13	ENSG00000151623.13	NR3C2	chr4:148078761-148444698	Ctrl	siHIF1A	OK	4.0433	6.24173	0.626413	1.63701	5e-05	0.000604383	yes
ENSG00000151726.12	ENSG00000151726.12	ACSL1	chr4:184755594-184826818	Ctrl	siHIF1A	OK	14.4678	9.39132	-0.623448	-2.12373	5e-05	0.000604383	yes
ENSG00000151835.12	ENSG00000151835.12	SACS	chr13:23328822-23433728	Ctrl	siHIF1A	OK	21.7265	12.3562	-0.814223	-2.61611	5e-05	0.000604383	yes
ENSG00000152076.17	ENSG00000152076.17	CCDC74B	chr2:130129620-130145134	Ctrl	siHIF1A	OK	1.84235	0.674803	-1.44901	-1.99355	5e-05	0.000604383	yes
ENSG00000152117.16	ENSG00000152117.16	AC093838.4	chr2:131492812-131521573	Ctrl	siHIF1A	OK	9.09013	5.21045	-0.802893	-2.92194	5e-05	0.000604383	yes
ENSG00000152137.5	ENSG00000152137.5	HSPB8	chr12:119178641-119221131	Ctrl	siHIF1A	OK	9.96664	6.07178	-0.714989	-2.40997	5e-05	0.000604383	yes
ENSG00000152219.4	ENSG00000152219.4	ARL14EP	chr11:30323050-30338227	Ctrl	siHIF1A	OK	10.4063	7.01048	-0.569869	-1.65388	5e-05	0.000604383	yes
ENSG00000152229.17	ENSG00000152229.17	PSTPIP2	chr18:45983535-46072272	Ctrl	siHIF1A	OK	1.52151	0.71832	-1.0828	-1.79012	5e-05	0.000604383	yes
ENSG00000152332.14	ENSG00000152332.14	UHMK1	chr1:162497250-162529629	Ctrl	siHIF1A	OK	48.8419	26.8146	-0.865099	-3.5214	5e-05	0.000604383	yes
ENSG00000152749.7	ENSG00000152749.7	GPR180	chr13:94601902-94634645	Ctrl	siHIF1A	OK	8.05093	4.68916	-0.779825	-3.08058	5e-05	0.000604383	yes
ENSG00000152778.8	ENSG00000152778.8	IFIT5	chr10:89414585-89421001	Ctrl	siHIF1A	OK	4.34299	9.92096	1.19179	4.17556	5e-05	0.000604383	yes
ENSG00000152795.16	ENSG00000152795.16	HNRNPDL	chr4:82422563-82430408	Ctrl	siHIF1A	OK	66.7316	91.9013	0.461715	1.82558	5e-05	0.000604383	yes
ENSG00000152952.10	ENSG00000152952.10	PLOD2	chr3:146064041-146163653	Ctrl	siHIF1A	OK	239.191	124.227	-0.945184	-2.78638	5e-05	0.000604383	yes
ENSG00000152990.12	ENSG00000152990.12	GPR125	chr4:22345070-22516054	Ctrl	siHIF1A	OK	12.6296	8.72935	-0.532858	-1.33604	5e-05	0.000604383	yes
ENSG00000153214.8	ENSG00000153214.8	TMEM87B	chr2:112055222-112119318	Ctrl	siHIF1A	OK	36.6199	20.8936	-0.80957	-1.76232	5e-05	0.000604383	yes
ENSG00000153233.11	ENSG00000153233.11	PTPRR	chr12:70638072-70920843	Ctrl	siHIF1A	OK	3.3357	1.28197	-1.37963	-3.17774	5e-05	0.000604383	yes
ENSG00000153250.16	ENSG00000153250.16	RBMS1	chr2:160272150-160493794	Ctrl	siHIF1A	OK	46.5397	34.4456	-0.43414	-1.42181	5e-05	0.000604383	yes
ENSG00000153395.8	ENSG00000153395.8	LPCAT1	chr5:1456479-1523977	Ctrl	siHIF1A	OK	15.9888	23.1339	0.532949	1.91807	5e-05	0.000604383	yes
ENSG00000153561.11	ENSG00000153561.11	RMND5A	chr2:86503429-86778041	Ctrl	siHIF1A	OK	24.028	13.1677	-0.86771	-1.95167	5e-05	0.000604383	yes
ENSG00000153936.15	ENSG00000153936.15	HS2ST1	chr1:86914647-87169204	Ctrl	siHIF1A	OK	9.68967	15.9283	0.717071	2.29352	5e-05	0.000604383	yes
ENSG00000153993.12	ENSG00000153993.12	SEMA3D	chr7:84995552-85186855	Ctrl	siHIF1A	OK	0.934079	0.296793	-1.65409	-2.23842	5e-05	0.000604383	yes
ENSG00000154102.9	ENSG00000154102.9	C16orf74	chr16:85690083-85751129	Ctrl	siHIF1A	OK	10.4217	15.6396	0.585611	1.7944	5e-05	0.000604383	yes
ENSG00000154127.8	ENSG00000154127.8	UBASH3B	chr11:122655674-122814473	Ctrl	siHIF1A	OK	11.7892	7.58143	-0.636921	-1.54442	5e-05	0.000604383	yes
ENSG00000154134.13	ENSG00000154134.13	ROBO3	chr11:124865385-124881470	Ctrl	siHIF1A	OK	10.6787	6.51593	-0.712697	-1.70754	5e-05	0.000604383	yes
ENSG00000154146.11	ENSG00000154146.11	NRGN	chr11:124739845-124747210	Ctrl	siHIF1A	OK	12.5464	7.5574	-0.731314	-2.16526	5e-05	0.000604383	yes
ENSG00000154262.11	ENSG00000154262.11	ABCA6	chr17:69078701-69141888	Ctrl	siHIF1A	OK	15.0431	22.5547	0.584332	1.61618	5e-05	0.000604383	yes
ENSG00000154429.9	ENSG00000154429.9	CCSAP	chr1:229319402-229343294	Ctrl	siHIF1A	OK	2.67371	1.71759	-0.638458	-1.98685	5e-05	0.000604383	yes
ENSG00000154553.12	ENSG00000154553.12	PDLIM3	chr4:185500659-185535612	Ctrl	siHIF1A	OK	9.32985	4.15629	-1.16656	-3.25271	5e-05	0.000604383	yes
ENSG00000154639.17	ENSG00000154639.17	CXADR	chr21:17512381-17593579	Ctrl	siHIF1A	OK	6.41204	2.32383	-1.46428	-2.9799	5e-05	0.000604383	yes
ENSG00000154642.9	ENSG00000154642.9	C21orf91	chr21:17763314-17819386	Ctrl	siHIF1A	OK	3.76357	2.34565	-0.682113	-1.58062	5e-05	0.000604383	yes
ENSG00000154813.8	ENSG00000154813.8	DPH3	chr3:16257977-16264972	Ctrl	siHIF1A	OK	8.67818	15.2024	0.808834	2.47386	5e-05	0.000604383	yes
ENSG00000154822.14	ENSG00000154822.14	PLCL2	chr3:16802650-17090594	Ctrl	siHIF1A	OK	2.88657	4.55319	0.65752	2.26252	5e-05	0.000604383	yes
ENSG00000154957.12	ENSG00000154957.12	ZNF18	chr17:11598430-11997510	Ctrl	siHIF1A	OK	1.47085	2.81523	0.936604	1.8916	5e-05	0.000604383	yes
ENSG00000154978.11	ENSG00000154978.11	VOPP1	chr7:55436055-55572988	Ctrl	siHIF1A	OK	37.2536	66.0977	0.827223	3.09751	5e-05	0.000604383	yes
ENSG00000155093.16	ENSG00000155093.16	PTPRN2	chr7:157539055-158587788	Ctrl	siHIF1A	OK	0.993582	0.532214	-0.900633	-2.13419	5e-05	0.000604383	yes
ENSG00000155189.10	ENSG00000155189.10	AGPAT5	chr8:6708356-6759666	Ctrl	siHIF1A	OK	54.829	35.786	-0.615546	-2.19422	5e-05	0.000604383	yes
ENSG00000155254.11	ENSG00000155254.11	MARVELD1	chr10:97713172-97718152	Ctrl	siHIF1A	OK	21.43	28.411	0.406819	1.56988	5e-05	0.000604383	yes
ENSG00000155287.9	ENSG00000155287.9	SLC25A28	chr10:99610521-99620609	Ctrl	siHIF1A	OK	13.4903	20.388	0.595798	1.77591	5e-05	0.000604383	yes
ENSG00000155307.16	ENSG00000155307.16	SAMSN1	chr21:14485227-14658821	Ctrl	siHIF1A	OK	3.80721	2.40401	-0.663292	-1.75162	5e-05	0.000604383	yes
ENSG00000155463.11	ENSG00000155463.11	OXA1L	chr14:22702142-22773041	Ctrl	siHIF1A	OK	108.367	79.0147	-0.455732	-1.74656	5e-05	0.000604383	yes
ENSG00000155640.6	ENSG00000155640.6	C10orf12	chr10:96981283-96986212	Ctrl	siHIF1A	OK	1.9462	3.10038	0.671788	2.34604	5e-05	0.000604383	yes
ENSG00000155660.9	ENSG00000155660.9	PDIA4	chr7:149003061-149028641	Ctrl	siHIF1A	OK	146.392	202.802	0.470233	1.76443	5e-05	0.000604383	yes
ENSG00000155858.5	ENSG00000155858.5	LSM11	chr5:157743694-157760709	Ctrl	siHIF1A	OK	6.33314	2.94721	-1.10357	-4.07799	5e-05	0.000604383	yes
ENSG00000155959.9	ENSG00000155959.9	VBP1	chrX:155197006-155239817	Ctrl	siHIF1A	OK	27.5792	14.0493	-0.973084	-3.63721	5e-05	0.000604383	yes
ENSG00000156030.11	ENSG00000156030.11	ELMSAN1	chr14:73715121-73803270	Ctrl	siHIF1A	OK	20.3951	11.4857	-0.82838	-2.09179	5e-05	0.000604383	yes
ENSG00000156140.7	ENSG00000156140.7	ADAMTS3	chr4:72280968-72568799	Ctrl	siHIF1A	OK	0.641096	0.250936	-1.35322	-1.9275	5e-05	0.000604383	yes
ENSG00000156172.5	ENSG00000156172.5	C8orf37	chr8:95204455-95810136	Ctrl	siHIF1A	OK	1.32532	0.7456	-0.829868	-1.98606	5e-05	0.000604383	yes
ENSG00000156374.13	ENSG00000156374.13	PCGF6	chr10:103302795-103351134	Ctrl	siHIF1A	OK	3.68178	5.44584	0.564751	1.61635	5e-05	0.000604383	yes
ENSG00000156453.12	ENSG00000156453.12	PCDH1	chr5:141853110-141879246	Ctrl	siHIF1A	OK	34.9823	46.8363	0.421004	1.69066	5e-05	0.000604383	yes
ENSG00000156463.16	ENSG00000156463.16	SH3RF2	chr5:145936578-146081791	Ctrl	siHIF1A	OK	0.819956	0.274485	-1.57882	-1.19448	5e-05	0.000604383	yes
ENSG00000156466.9	ENSG00000156466.9	GDF6	chr8:96142329-96160792	Ctrl	siHIF1A	OK	13.939	25.945	0.896336	3.58238	5e-05	0.000604383	yes
ENSG00000156504.15	ENSG00000156504.15	FAM122B	chrX:134769565-134854610	Ctrl	siHIF1A	OK	3.93807	2.38281	-0.724822	-1.90133	5e-05	0.000604383	yes
ENSG00000156515.20	ENSG00000156515.20	HK1	chr10:69269983-69401882	Ctrl	siHIF1A	OK	57.7581	42.2782	-0.450109	-1.66822	5e-05	0.000604383	yes
ENSG00000156535.12	ENSG00000156535.12	CD109	chr6:73693902-73828316	Ctrl	siHIF1A	OK	43.2662	26.5754	-0.703149	-2.66407	5e-05	0.000604383	yes
ENSG00000156587.14	ENSG00000156587.14	UBE2L6	chr11:57551655-57568284	Ctrl	siHIF1A	OK	35.7148	79.8751	1.16122	4.55261	5e-05	0.000604383	yes
ENSG00000156603.13	ENSG00000156603.13	MED19	chr11:57703713-57712221	Ctrl	siHIF1A	OK	10.7757	15.6422	0.537654	1.77966	5e-05	0.000604383	yes
ENSG00000156671.11	ENSG00000156671.11	SAMD8	chr10:75094431-75182123	Ctrl	siHIF1A	OK	13.3669	9.51724	-0.490053	-1.52976	5e-05	0.000604383	yes
ENSG00000156711.15	ENSG00000156711.15	MAPK13	chr6:36127808-36144524	Ctrl	siHIF1A	OK	3.09235	0.967996	-1.67563	-2.77259	5e-05	0.000604383	yes
ENSG00000156795.5	ENSG00000156795.5	WDYHV1	chr8:123416724-123467230	Ctrl	siHIF1A	OK	6.04195	3.79641	-0.670376	-1.57459	5e-05	0.000604383	yes
ENSG00000157601.12	ENSG00000157601.12	MX1	chr21:41420303-41459214	Ctrl	siHIF1A	OK	22.7165	161.416	2.82897	7.05867	5e-05	0.000604383	yes
ENSG00000157954.13	ENSG00000157954.13	WIPI2	chr7:5190187-5233826	Ctrl	siHIF1A	OK	26.8995	40.5929	0.593647	2.17653	5e-05	0.000604383	yes
ENSG00000158201.8	ENSG00000158201.8	ABHD3	chr18:21650896-21704805	Ctrl	siHIF1A	OK	7.06183	4.11184	-0.780258	-2.00123	5e-05	0.000604383	yes
ENSG00000158246.7	ENSG00000158246.7	FAM46B	chr1:27005019-27012836	Ctrl	siHIF1A	OK	0.623034	0.258975	-1.2665	-1.9498	5e-05	0.000604383	yes
ENSG00000158270.11	ENSG00000158270.11	COLEC12	chr18:316736-500722	Ctrl	siHIF1A	OK	10.9117	6.57661	-0.730456	-2.79367	5e-05	0.000604383	yes
ENSG00000158292.6	ENSG00000158292.6	GPR153	chr1:6247345-6260975	Ctrl	siHIF1A	OK	3.18447	1.9682	-0.694177	-2.08384	5e-05	0.000604383	yes
ENSG00000158373.8	ENSG00000158373.8	HIST1H2BD	chr6:26158145-26171349	Ctrl	siHIF1A	OK	104.851	68.6984	-0.609991	-2.28867	5e-05	0.000604383	yes
ENSG00000158406.3	ENSG00000158406.3	HIST1H4H	chr6:26285112-26285509	Ctrl	siHIF1A	OK	98.521	66.6769	-0.563245	-2.0418	5e-05	0.000604383	yes
ENSG00000158615.8	ENSG00000158615.8	PPP1R15B	chr1:204377849-204494724	Ctrl	siHIF1A	OK	21.2245	12.8396	-0.72513	-1.92257	5e-05	0.000604383	yes
ENSG00000158966.12	ENSG00000158966.12	CACHD1	chr1:64470791-64693058	Ctrl	siHIF1A	OK	2.11742	1.27809	-0.728316	-1.92572	5e-05	0.000604383	yes
ENSG00000159164.8	ENSG00000159164.8	SV2A	chr1:149903317-149917882	Ctrl	siHIF1A	OK	1.08513	0.447955	-1.27644	-2.74112	5e-05	0.000604383	yes
ENSG00000159167.10	ENSG00000159167.10	STC1	chr8:23841914-23854807	Ctrl	siHIF1A	OK	9.95821	4.49424	-1.14781	-3.85496	5e-05	0.000604383	yes
ENSG00000159200.16	ENSG00000159200.16	RCAN1	chr21:34513141-34615142	Ctrl	siHIF1A	OK	5.83261	8.048	0.464488	1.54446	5e-05	0.000604383	yes
ENSG00000159216.17	ENSG00000159216.17	RUNX1	chr21:34787800-36004667	Ctrl	siHIF1A	OK	2.693	1.41667	-0.926715	-1.56967	5e-05	0.000604383	yes
ENSG00000159261.9	ENSG00000159261.9	CLDN14	chr21:36430359-36576569	Ctrl	siHIF1A	OK	17.3761	5.62345	-1.62758	-3.24805	5e-05	0.000604383	yes
ENSG00000159388.5	ENSG00000159388.5	BTG2	chr1:203305490-203309602	Ctrl	siHIF1A	OK	33.9264	62.2173	0.874907	3.46226	5e-05	0.000604383	yes
ENSG00000159399.8	ENSG00000159399.8	HK2	chr2:74832654-74893359	Ctrl	siHIF1A	OK	5.23482	1.60464	-1.70589	-3.92128	5e-05	0.000604383	yes
[truncated: 2,151 more rows]

## Sheet: Up
test_id	gene_id	gene	locus	sample_1	sample_2	status	value_1	value_2	log2(fold_change)	test_stat	p_value	q_value	significant
[truncated: 1,351 more rows]

[truncated: 1 more sheets: Down]
