# Supplementary material for: HIF-1α is required for disturbed flow-induced metabolic reprogramming in human and porcine vascular endothelium
Source: eLife journal article supplement (doi:10.7554/elife.25217), 2017-05-30
Supplement: supp [file elife-25217-supp-v1.zip › elife_poa_e25217_Figure_2_source_data_3.xlsx]

## Sheet: HALLMARK_HYPOXIA
GENE	GENE_TITLE	RANK IN GENE LIST	RANK METRIC SCORE	RUNNING ES
EDN2	endothelin 2	0	4.88278	0.0347662
PPFIA4	protein tyrosine phosphatase, receptor type, f polypeptide (PTPRF), interacting protein (liprin), alpha 4	1	4.77809	0.0687869
CA12	carbonic anhydrase XII	7	4.1042	0.096653
ALDOC	aldolase C, fructose-bisphosphate	23	3.35816	0.116494
AK4	null	39	3.19409	0.135167
SLC6A6	solute carrier family 6 (neurotransmitter transporter, taurine), member 6	56	2.92581	0.151659
TGFBI	transforming growth factor, beta-induced, 68kDa	58	2.88377	0.17192
HK2	hexokinase 2	75	2.69421	0.186763
LDHA	lactate dehydrogenase A	79	2.65131	0.204827
AMPD3	adenosine monophosphate deaminase (isoform E)	85	2.59097	0.221918
CDKN1C	cyclin-dependent kinase inhibitor 1C (p57, Kip2)	98	2.50038	0.236466
VEGFA	null	103	2.46771	0.252951
ADORA2B	adenosine A2b receptor	124	2.31961	0.264041
STC2	stanniocalcin 2	128	2.29348	0.279557
PGM1	phosphoglucomutase 1	142	2.23074	0.291914
LOX	lysyl oxidase	184	2.03823	0.295303
ANGPTL4	angiopoietin-like 4	187	2.03388	0.309242
BHLHE40	null	210	1.94476	0.31712
DTNA	dystrobrevin, alpha	237	1.88454	0.323485
CSRP2	cysteine and glycine-rich protein 2	238	1.88326	0.336894
STC1	stanniocalcin 1	256	1.81941	0.345236
IDS	iduronate 2-sulfatase (Hunter syndrome)	262	1.80515	0.356733
TNFAIP3	tumor necrosis factor, alpha-induced protein 3	266	1.80072	0.36874
SDC2	syndecan 2 (heparan sulfate proteoglycan 1, cell surface-associated, fibroglycan)	284	1.7551	0.376625
ERRFI1	ERBB receptor feedback inhibitor 1	287	1.74737	0.388524
PPP1R3C	protein phosphatase 1, regulatory (inhibitor) subunit 3C	304	1.70406	0.396316
TPBG	trophoblast glycoprotein	315	1.68389	0.405593
BCL2	B-cell CLL/lymphoma 2	327	1.66005	0.414428
SLC2A1	solute carrier family 2 (facilitated glucose transporter), member 1	354	1.61178	0.418851
EGFR	epidermal growth factor receptor (erythroblastic leukemia viral (v-erb-b) oncogene homolog, avian)	374	1.56023	0.424805
BCAN	brevican	402	1.51354	0.428257
P4HA1	procollagen-proline, 2-oxoglutarate 4-dioxygenase (proline 4-hydroxylase), alpha polypeptide I	412	1.4903	0.436426
SELENBP1	selenium binding protein 1	415	1.48662	0.446469
FAM162A	null	423	1.48218	0.455123
MXI1	MAX interactor 1	425	1.47574	0.465359
MIF	macrophage migration inhibitory factor (glycosylation-inhibiting factor)	432	1.46321	0.47415
RORA	RAR-related orphan receptor A	446	1.43922	0.48087
ENO1	enolase 1, (alpha)	462	1.42514	0.486948
TPD52	tumor protein D52	472	1.41296	0.494567
PDK1	pyruvate dehydrogenase kinase, isozyme 1	538	1.33657	0.486449
ALDOA	aldolase A, fructose-bisphosphate	548	1.32209	0.493421
PGK1	phosphoglycerate kinase 1	596	1.26678	0.48969
GAPDH	glyceraldehyde-3-phosphate dehydrogenase	619	1.2439	0.492578
VLDLR	very low density lipoprotein receptor	643	1.22902	0.495089
BNIP3L	BCL2/adenovirus E1B 19kDa interacting protein 3-like	711	1.16716	0.485223
EFNA3	ephrin-A3	735	1.14891	0.487163
SCARB1	scavenger receptor class B, member 1	736	1.14881	0.495343
DDIT4	DNA-damage-inducible transcript 4	737	1.14819	0.503518
CDKN1B	cyclin-dependent kinase inhibitor 1B (p27, Kip1)	742	1.14269	0.510569
NDRG1	N-myc downstream regulated gene 1	797	1.09874	0.503742
LXN	latexin	912	1.02221	0.480093
BGN	biglycan	939	1.00442	0.480191
KDM3A	null	979	0.973882	0.476544
SDC3	syndecan 3 (N-syndecan)	982	0.971225	0.482917
ADM	adrenomedullin	995	0.957459	0.486479
MAFF	v-maf musculoaponeurotic fibrosarcoma oncogene homolog F (avian)	1021	0.937206	0.48637
TGFB3	transforming growth factor, beta 3	1040	0.927073	0.488087
GBE1	glucan (1,4-alpha-), branching enzyme 1 (glycogen branching enzyme, Andersen disease, glycogen storage disease type IV)	1064	0.904775	0.488289
ZNF292	zinc finger protein 292	1119	0.870237	0.479836
AKAP12	A kinase (PRKA) anchor protein (gravin) 12	1143	0.857374	0.4797
HK1	hexokinase 1	1252	0.79108	0.456033
GPI	glucose phosphate isomerase	1289	0.770356	0.451751
NFIL3	nuclear factor, interleukin 3 regulated	1418	0.698738	0.422001
ATP7A	ATPase, Cu++ transporting, alpha polypeptide (Menkes syndrome)	1491	0.659151	0.40716
CXCR4	chemokine (C-X-C motif) receptor 4	1566	0.6165	0.391474
FOSL2	FOS-like antigen 2	1686	0.568054	0.363234
GCNT2	glucosaminyl (N-acetyl) transferase 2, I-branching enzyme (I blood group)	1695	0.564394	0.365083
CXCR7	chemokine (C-X-C motif) receptor 7	1722	0.551723	0.361957
XPNPEP1	X-prolyl aminopeptidase (aminopeptidase P) 1, soluble	1848	0.491314	0.331543
SLC25A1	solute carrier family 25 (mitochondrial carrier; citrate transporter), member 1	1917	0.45301	0.316321
PNRC1	proline-rich nuclear receptor coactivator 1	1923	0.447868	0.318153
PLIN2	null	1945	0.431937	0.315531
MAP3K1	mitogen-activated protein kinase kinase kinase 1	2077	-0.488602	0.28347
CDKN1A	cyclin-dependent kinase inhibitor 1A (p21, Cip1)	2123	-0.510302	0.274895
PPP1R15A	protein phosphatase 1, regulatory (inhibitor) subunit 15A	2286	-0.572088	0.235019
NEDD4L	neural precursor cell expressed, developmentally down-regulated 4-like	2423	-0.628034	0.202594
TGM2	transglutaminase 2 (C polypeptide, protein-glutamine-gamma-glutamyltransferase)	2561	-0.689422	0.170335
DUSP1	dual specificity phosphatase 1	2614	-0.711475	0.161294
SIAH2	seven in absentia homolog 2 (Drosophila)	2686	-0.741235	0.147309
HDLBP	high density lipoprotein binding protein (vigilin)	2688	-0.742028	0.152321
KLF6	Kruppel-like factor 6	2799	-0.78758	0.128086
CYR61	cysteine-rich, angiogenic inducer, 61	2809	-0.793458	0.131294
PFKL	phosphofructokinase, liver	2887	-0.836661	0.116361
CAV1	caveolin 1, caveolae protein, 22kDa	2901	-0.845913	0.118858
SRPX	sushi-repeat-containing protein, X-linked	3021	-0.928952	0.0931876
GAA	glucosidase, alpha; acid (Pompe disease, glycogen storage disease type II)	3100	-0.984001	0.0790327
EXT1	exostoses (multiple) 1	3155	-1.02673	0.0716931
MYH9	myosin, heavy chain 9, non-muscle	3224	-1.07728	0.0609154
CITED2	Cbp/p300-interacting transactivator, with Glu/Asp-rich carboxy-terminal domain, 2	3303	-1.16719	0.0480648
COL5A1	collagen, type V, alpha 1	3438	-1.37154	0.0214766
PTRF	polymerase I and transcript release factor	3468	-1.43096	0.0237976
IGFBP1	insulin-like growth factor binding protein 1	3584	-1.73907	0.00498094
CHST2	carbohydrate (N-acetylglucosamine-6-O) sulfotransferase 2	3593	-1.76847	0.0154024
SDC4	syndecan 4 (amphiglycan, ryudocan)	3662	-2.03735	0.0114605
MT1E	metallothionein 1E (functional)	3745	-2.84841	0.00949525

## Sheet: HALLMARK_GLYCOLYSIS
PROBE	GENE_TITLE	RANK IN GENE LIST	RANK METRIC SCORE	RUNNING ENRICHMENT SCORE
PPFIA4	protein tyrosine phosphatase, receptor type, f polypeptide (PTPRF), interacting protein (liprin), alpha 4	1	4.77809	0.0480776
AK4	null	39	3.19409	0.0704293
EGLN3	egl nine homolog 3 (C. elegans)	46	3.12871	0.100471
TGFBI	transforming growth factor, beta-induced, 68kDa	58	2.88377	0.126687
HK2	hexokinase 2	75	2.69421	0.149638
CD44	CD44 molecule (Indian blood group)	78	2.66554	0.17607
LDHA	lactate dehydrogenase A	79	2.65131	0.202897
VEGFA	null	103	2.46771	0.221671
ADORA2B	adenosine A2b receptor	124	2.31961	0.239754
STC2	stanniocalcin 2	128	2.29348	0.262152
SPAG4	sperm associated antigen 4	152	2.16677	0.27788
ANGPTL4	angiopoietin-like 4	187	2.03388	0.289301
STC1	stanniocalcin 1	256	1.81941	0.289391
TXN	thioredoxin	264	1.80278	0.305747
SDC2	syndecan 2 (heparan sulfate proteoglycan 1, cell surface-associated, fibroglycan)	284	1.7551	0.318387
KIF20A	kinesin family member 20A	285	1.75143	0.336109
TPBG	trophoblast glycoprotein	315	1.68389	0.345335
DEPDC1	DEP domain containing 1	329	1.65785	0.358608
PLOD2	procollagen-lysine, 2-oxoglutarate 5-dioxygenase 2	336	1.64432	0.37363
SLC16A3	solute carrier family 16, member 3 (monocarboxylic acid transporter 4)	343	1.63268	0.388534
CAPN5	calpain 5	364	1.58805	0.399214
EGFR	epidermal growth factor receptor (erythroblastic leukemia viral (v-erb-b) oncogene homolog, avian)	374	1.56023	0.412577
P4HA1	procollagen-proline, 2-oxoglutarate 4-dioxygenase (proline 4-hydroxylase), alpha polypeptide I	412	1.4903	0.417689
CDK1	null	422	1.4831	0.430271
FAM162A	null	423	1.48218	0.445268
MXI1	MAX interactor 1	425	1.47574	0.459931
MIF	macrophage migration inhibitory factor (glycosylation-inhibiting factor)	432	1.46321	0.47312
ENO1	enolase 1, (alpha)	462	1.42514	0.479728
ALDOA	aldolase A, fructose-bisphosphate	548	1.32209	0.470207
PGK1	phosphoglycerate kinase 1	596	1.26678	0.470363
CHST1	carbohydrate (keratan sulfate Gal-6) sulfotransferase 1	628	1.24041	0.474563
VLDLR	very low density lipoprotein receptor	643	1.22902	0.483227
VCAN	null	722	1.15947	0.473946
EFNA3	ephrin-A3	735	1.14891	0.482339
DDIT4	DNA-damage-inducible transcript 4	737	1.14819	0.493687
MET	met proto-oncogene (hepatocyte growth factor receptor)	898	1.03058	0.461012
SDC3	syndecan 3 (N-syndecan)	982	0.971225	0.448479
ZNF292	zinc finger protein 292	1119	0.870237	0.420647
G6PD	glucose-6-phosphate dehydrogenase	1154	0.853472	0.420123
GALE	UDP-galactose-4-epimerase	1197	0.82822	0.417189
PGAM1	phosphoglycerate mutase 1 (brain)	1207	0.822158	0.423083
ME2	malic enzyme 2, NAD(+)-dependent, mitochondrial	1541	0.633313	0.339782
CXCR4	chemokine (C-X-C motif) receptor 4	1566	0.6165	0.339555
FKBP4	FK506 binding protein 4, 59kDa	1574	0.613394	0.343876
MERTK	c-mer proto-oncogene tyrosine kinase	1700	0.561996	0.315888
PHKA2	phosphorylase kinase, alpha 2 (liver)	1736	0.544942	0.311973
PPP2CB	protein phosphatase 2 (formerly 2A), catalytic subunit, beta isoform	1737	0.544898	0.317486
MDH2	malate dehydrogenase 2, NAD (mitochondrial)	1766	0.533419	0.315341
GLCE	UDP-glucuronic acid epimerase	1789	0.525414	0.31473
ARPP19	null	1918	0.452934	0.284831
PYGL	phosphorylase, glycogen; liver (Hers disease, glycogen storage disease type VI)	1927	0.446361	0.287192
AKR1A1	aldo-keto reductase family 1, member A1 (aldehyde reductase)	1977	-0.429568	0.278338
TSTA3	tissue specific transplantation antigen P35B	2030	-0.463653	0.269021
COPB2	coatomer protein complex, subunit beta 2 (beta prime)	2075	-0.488199	0.262107
IL13RA1	interleukin 13 receptor, alpha 1	2138	-0.51536	0.250619
PRPS1	phosphoribosyl pyrophosphate synthetase 1	2637	-0.72098	0.123755
GMPPA	GDP-mannose pyrophosphorylase A	2680	-0.739246	0.119921
HDLBP	high density lipoprotein binding protein (vigilin)	2688	-0.742028	0.125543
GNPDA1	glucosamine-6-phosphate deaminase 1	2705	-0.751382	0.128835
AGRN	null	2951	-0.878506	0.0717225
EXT1	exostoses (multiple) 1	3155	-1.02673	0.0274239
CITED2	Cbp/p300-interacting transactivator, with Glu/Asp-rich carboxy-terminal domain, 2	3303	-1.16719	-0.000367203
HS2ST1	heparan sulfate 2-O-sulfotransferase 1	3319	-1.18249	0.00755689
COL5A1	collagen, type V, alpha 1	3438	-1.37154	-0.010354
TGFA	transforming growth factor, alpha	3469	-1.43547	-0.00391112
LHPP	-	3542	-1.57755	-0.00734526
CHST2	carbohydrate (N-acetylglucosamine-6-O) sulfotransferase 2	3593	-1.76847	-0.00292085
SDC1	syndecan 1	3717	-2.42227	-0.0115469
TFF3	trefoil factor 3 (intestinal)	3741	-2.79187	0.0105065
