# Supplementary material for: HIF-1α is required for disturbed flow-induced metabolic reprogramming in human and porcine vascular endothelium
Source: eLife journal article supplement (doi:10.7554/elife.25217), 2017-05-30
Supplement: supp [file elife-25217-supp-v1.zip › elife_poa_e25217_Figure_3_figure_supplement_1.pdf]

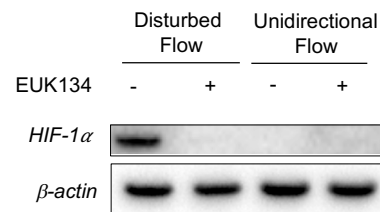

**Figure 3 – figure supplement 1. EUK134 has no effect on HIF-1 $\alpha$  under UF.** HAECs were subjected to UF or DF for 24 hours, with either DMSO or EUK134 at 1mM.
