# Supplementary material for: HIF-1α is required for disturbed flow-induced metabolic reprogramming in human and porcine vascular endothelium
Source: eLife journal article supplement (doi:10.7554/elife.25217), 2017-05-30
Supplement: supp [file elife-25217-supp-v1.zip › elife_poa_e25217_Figure_3_figure_supplement_2.pdf]

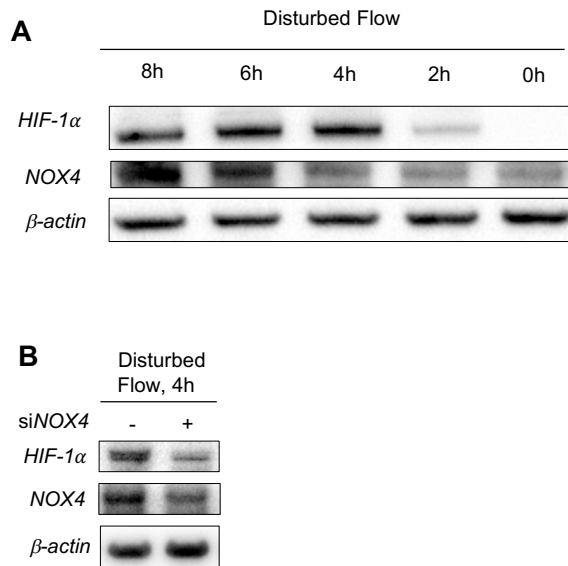

**Figure 3 – figure supplement 2. *HIF-1 $\alpha$*  and *NOX4* kinetics under DF. A.** HAECs were subjected to UF for 24 hours prior to switching to DF for the indicated times. *HIF-1 $\alpha$*  reaches maximal induction at 4 hours before stabilizing at a slightly lower level. *NOX4* increases steadily with increasing duration of disturbed flow. **B.** HAECs were treated with either non-targeting siRNA (-) or siRNA targeted towards *NOX4* (+) for 24 hours before subjecting to DF for 4h. Reducing *NOX4* at early time points, even when *NOX4* is not abundant, will reduce *HIF-1 $\alpha$*  expression.
