# Supplementary material for: HIF-1α is required for disturbed flow-induced metabolic reprogramming in human and porcine vascular endothelium
Source: eLife journal article supplement (doi:10.7554/elife.25217), 2017-05-30
Supplement: supp [file elife-25217-supp-v1.zip › elife_poa_e25217_Figure_4_figure_supplement_1.pdf]

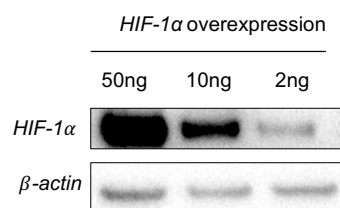

**Figure 4 – figure supplement 1. Disturbed flow stabilization of *HIF-1α* precedes NOX4 abundance.** An overexpression vector containing *HIF-1α* with mutated known prolyl hydroxylase binding amino acids was expressed in HAECs using *in vitro* transcription for 6 hours before cell lysis and analysis of *HIF-1α*, *SLC2A1* ( $\beta$ -actin serves as a loading control) showing a dose-dependent effect.
