# Supplementary material for: HIF-1α is required for disturbed flow-induced metabolic reprogramming in human and porcine vascular endothelium
Source: eLife journal article supplement (doi:10.7554/elife.25217), 2017-05-30
Supplement: supp [file elife-25217-supp-v1.zip › elife_poa_e25217_Figure_4_figure_supplement_2.pdf]

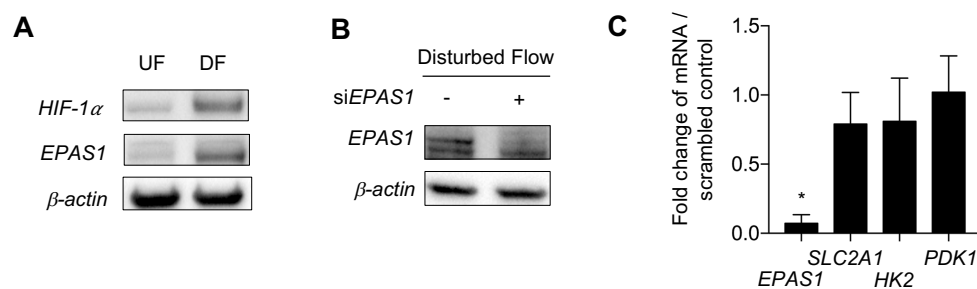

**Figure 4 – figure supplement 2. Disturbed flow stabilization of EPAS1 does not contribute to glycolytic gene transcription.** (A) HAECs were subjected to 24 hours of either UF or DF prior to cell lysis and Western blotting. Both *HIF-1α* and *EPAS1* are increased under DF. HAECs were subjected to DF for 24 hours after 24 hours of treatment with either control siRNA or siRNA targeted towards *EPAS1* prior to cell lysis, followed by (B) Western blotting or (C) RNA isolation and qRT-PCR. B. The siRNA is able to reduce *EPAS1* under disturbed flow. C. *SLC2A1* and *HK2* are unchanged following siEPAS1 treatment and DF. *EPAS1* levels are significantly lower (n = 6). \* p < 0.05.
