# Supplementary material for: HIF-1α is required for disturbed flow-induced metabolic reprogramming in human and porcine vascular endothelium
Source: eLife journal article supplement (doi:10.7554/elife.25217), 2017-05-30
Supplement: supp [file elife-25217-supp-v1.zip › elife_poa_e25217_Figure_5_figure_supplement_1.pdf]

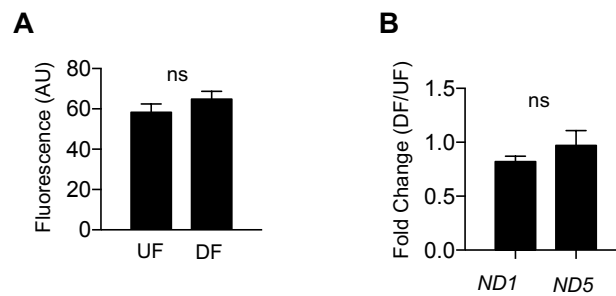

**Figure 5 – figure supplement 1. Mitochondrial biogenesis is the same in differential flow.** HAECs were subjected to either DF or UF for 48 hours. A. After flow, the cells were washed and incubated in mitotracker for 30 minutes before imaging (n = 50 per condition). B. After flow, the cells were lysed and RNA harvested before performing qRT-PCR for mitochondrial genes *ND1* and *ND5* (n = 4).
