# Supplementary material for: HIF-1α is required for disturbed flow-induced metabolic reprogramming in human and porcine vascular endothelium
Source: eLife journal article supplement (doi:10.7554/elife.25217), 2017-05-30
Supplement: supp [file elife-25217-supp-v1.zip › elife_poa_e25217_Figure_5_figure_supplement_3.pdf]

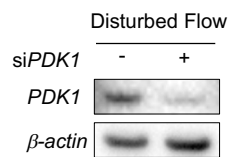

**Figure 5 figure supplement 3. siRNA targeted against *PDK1*.** HAECs were treated with either control siRNA (-) or siRNA targeted against *PDK1* (+) for 24 hours prior to disturbed flow for 48 hours, followed by cell lysis and Western blotting.
