# Supplementary material for: HIF-1α is required for disturbed flow-induced metabolic reprogramming in human and porcine vascular endothelium
Source: eLife journal article supplement (doi:10.7554/elife.25217), 2017-05-30
Supplement: supp [file elife-25217-supp-v1.zip › elife_poa_e25217_Figure_6_figure_supplement_1.pdf]

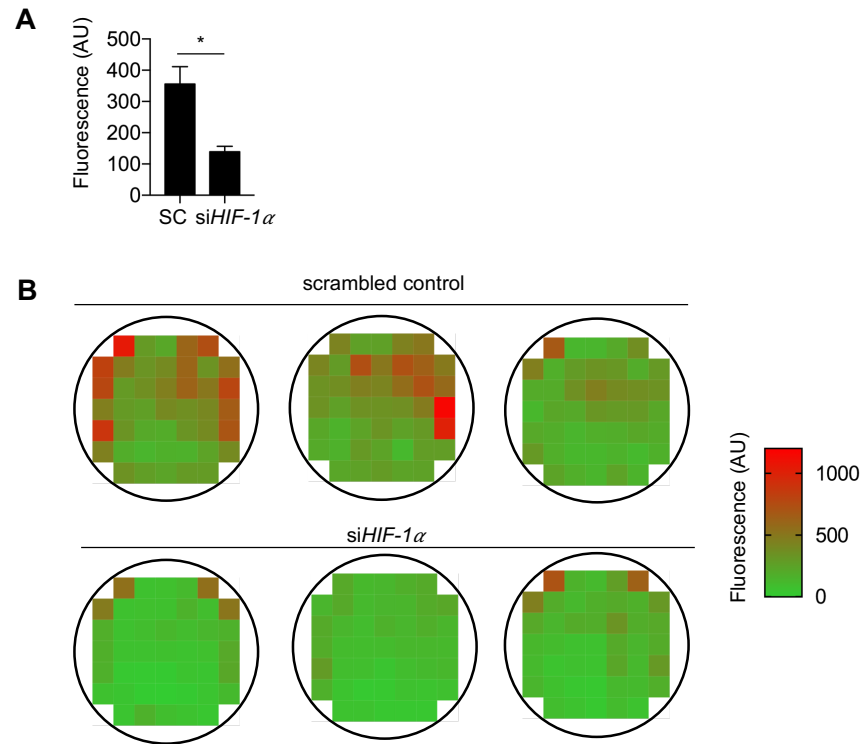

**Figure 6 – figure supplement 1. *HIF-1 $\alpha$*  knockdown reduces leukocyte adhesion.** HAECs were subjected to DF for 48 hours after either control siRNA (SC) or siRNA targeted towards *HIF-1 $\alpha$*  treatment for 24 hours. After removal from DF, 5-fold THP-1 cells loaded with 5  $\mu$ M calcein AM dye for were incubated with the HAECs for 1 hour. The samples were subsequently washed 3 times with PBS prior to **(A)** fluorescence counting. **B.** Biological replicates and fluorescence intensities of plates are shown (n = 3). \* p < 0.05.
