# Supplementary material for: HIF-1α is required for disturbed flow-induced metabolic reprogramming in human and porcine vascular endothelium
Source: eLife journal article supplement (doi:10.7554/elife.25217), 2017-05-30
Supplement: supp [file elife-25217-supp-v1.zip › elife_poa_e25217_Figure_6_figure_supplement_2.pdf]

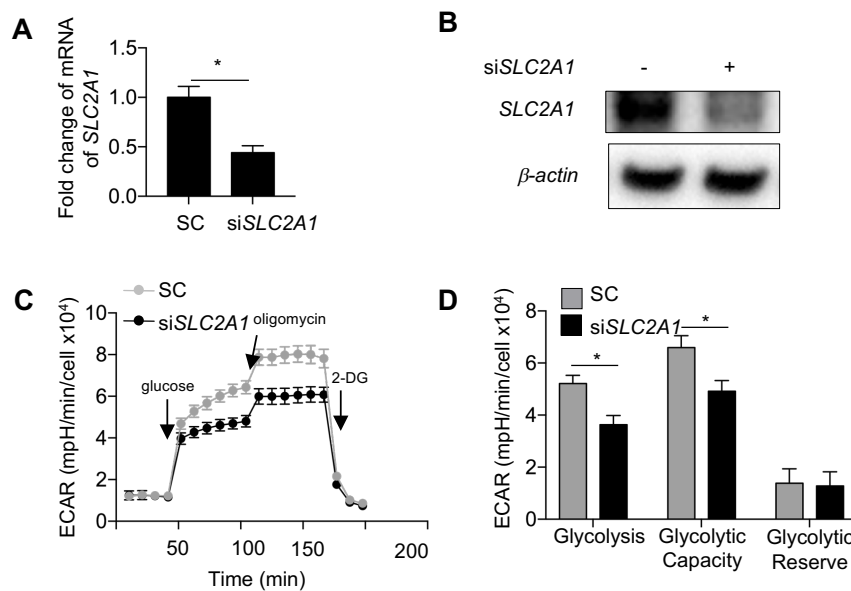

**Figure 6 – figure supplement 2. *SLC2A1* controls glycolysis in HAECs.** Control siRNA or siRNA targeted against *SLC2A1* (50 nM) were incubated with HAECs for 72 hours prior to cell lysis, **(A)** RNA purification and qRT-PCR for *SLC2A1* (n = 4) or **(B)** Western blotting for *SLC2A1*. HAECs were treated with either control siRNA or siRNA targeted against *SLC2A1* (50 nM) for 24 hours prior to disturbed flow treatment for 48 hours and **(C)** glycolysis stress test and quantification of glycolysis stress test parameters **(D)** (n = 5).
