# Supplementary material for: HIF-1α is required for disturbed flow-induced metabolic reprogramming in human and porcine vascular endothelium
Source: eLife journal article supplement (doi:10.7554/elife.25217), 2017-05-30
Supplement: supp [file elife-25217-supp-v1.zip › elife_poa_e25217_Figure_6_figure_supplement_3.pdf]

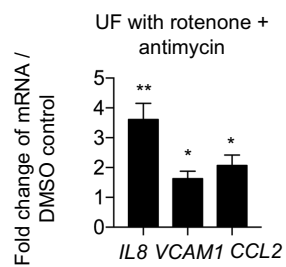

**Figure 6 – figure supplement 3. Mitochondrial inhibition increases inflammation.** HAECs were treated with DMSO or rotenone (1  $\mu$ M) and antimycin (1  $\mu$ M) and subjected to UF for 24 hours prior to cell lysis, RNA purification, and qRT-PCR (n = 4). \* p < 0.05; \*\* p < 0.005
