# Supplementary material for: HIF-1α is required for disturbed flow-induced metabolic reprogramming in human and porcine vascular endothelium
Source: eLife journal article supplement (doi:10.7554/elife.25217), 2017-05-30
Supplement: supp [file elife-25217-supp-v1.zip › elife_poa_e25217_Figure_6_figure_supplement_4.pdf]

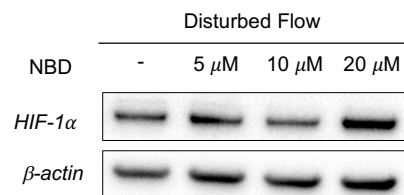

**Figure 6 – figure supplement 4. *HIF-1 $\alpha$*  is upstream of *NF- $\kappa$ B*-induced inflammatory gene transcription.** HAECs were subjected to DF for 24 hours and simultaneously treated with DMSO or NBD prior to cell lysis and Western blotting. There is no reduction in *HIF-1 $\alpha$*  by inhibiting the *NF- $\kappa$ B* pathway with either of the two compounds.
